# Supplementary material for: Impact of BNT162b First Vaccination on the Immune Transcriptome of Elderly Patients Infected with the B.1.351 SARS-CoV-2 Variant
Source: Res Sq. 2021 Jun 1:rs.3.rs-509143. Preprint. [Version 1] doi: 10.21203/rs.3.rs-509143/v1 (PMC8183022; doi:10.21203/rs.3.rs-509143/v1)
Supplement: Supplement 1 [file 3985c39eaed4394810fbcf57.xlsx]

## Sheet: Sheet1
Group	patient ID	Variant	Age	1st Vaccination prior to COVID symptoms (days)	2nd Vaccination after 1st vaccination (days)	COVID-19 test after onset of symptoms (days)	first blood draw after onset of symptoms (days)	second blood draw after the onset of symptoms (days)	Disease severity	Steroid Treatment + Other	Hospitalization (days)	BMI	Underlying diseases
Unvaccinated	1	B.1.351	91			4	10	28	moderate	Dexamethsone 6 mg (1st samping between treatment)	11	33.2	atrial fibrillation; hypertension, chronic renal insufficiency stage III
	6	B.1.351	79			5	12	30	severe	Dexamethsone 6mg + Methylprednisolone (1st-2nd samplings next day of treatment)	32 (ICU 2d)	31.3	hypertension
Vaccinated	2	B.1.351	80	-8	41	6	13	31	severe	Dexamethsone 6mg (1st samping between treatment) + 4mg (before 2nd sampling)	15 (ICU 11d)	33.3	hypertension
	3	B.1.351	85	-11	38	3	10	28	mild	Dexamethsone 6mg (before 1st sampling)	19	22.2	atrial fibrillation, hypertension, chronic renal insufficiency, chronic heart disease, dementia
	4	B.1.351	87	-11		4	10	deceased	severe	Dexamethsone 6 mg (1st samping between treatment)	11 (ICU 1d)	32.4	hypertension, renal insufficiency, dementia
	5	B.1.351	71	-11	38	4	10	28	severe	Dexamethsone 6mg (1st samping between treatment) + 4mg (before 2nd sampling)	11	22	hypertension, chronic heart disease, dementia
Unvaccinated_young	7	B.1.351	58			6	14	27	severe	Dexamethsone 4mg + Methylprednisolone (1st-2nd samplings between treatment), Enoxaparin sodium, Ceftriaxone for 8 days	53 (ICU 29d)	34	CLL, hepatosplenomegaly, mitral regurgitation, diastolic disfunction
	14	B.1.351	62			-3	-1	6	mild to moderate	no	11	38.1	cerebral leukoencephalopathy, diabetes mellitus, hypertension
	24	B.1.351	48			9	10	18	moderate	no	18	28.8	none
Non-COVID (GSE162562)	379		67
	397		54
	401		51
	407		59
	413		75
