# Supplementary material for: Impact of BNT162b First Vaccination on the Immune Transcriptome of Elderly Patients Infected with the B.1.351 SARS-CoV-2 Variant
Source: Res Sq. 2021 Jun 1:rs.3.rs-509143. Preprint. [Version 1] doi: 10.21203/rs.3.rs-509143/v1 (PMC8183022; doi:10.21203/rs.3.rs-509143/v1)
Supplement: Supplement 2 [file 413631c879bc784fbe4b8623.xlsx]

## Sheet: B1351_Vaccine_1st vs 2nd-allGen
	Vaccinated_1st				Vaccinated_2nd
Gene	ID2_1st	ID3_1st	ID4_1st	ID5_1st	ID2_2nd	ID3_2nd	ID5_2nd	log2FoldChange	pvalue	padj	meanVaccine	meanVaccine_2nd
A1BG	2.08229	7.60108	1.24235	6.04056	7.00568	2.94533	6.9934	0.513395	0.638523	NA	4.24157	5.64813
A1BG-AS1	17.6995	21.5364	14.9082	8.45679	18.0146	14.7266	12.8212	-0.0276146	0.956577	0.981265	15.6502	15.1875
A1CF	2.08229	1.26685	1.24235	4.83245	3.00244	1.47266	6.9934	0.688122	0.443645	NA	2.35598	3.82283
A2M	162.419	32.938	98.1457	57.9894	217.176	88.3598	143.365	0.781092	0.0408212	0.156362	87.8729	149.634
A2M-AS1	59.3452	6.33424	11.1812	21.746	103.084	19.1446	94.4108	1.62631	0.000810235	0.0105556	24.6517	72.213
A2ML1	1.04114	1.26685	0	6.04056	10.0081	5.89065	6.9934	1.87332	0.0530853	NA	2.08714	7.63072
A2MP1	102.032	6.33424	6.21175	32.619	149.121	45.6526	123.55	1.89806	0.0001416	0.00300306	36.7993	106.108
A3GALT2	351.907	273.639	639.811	437.337	322.261	402.037	223.789	-0.420829	0.187398	0.406174	425.673	316.029
A4GNT	7.28801	16.469	8.69646	8.45679	2.00162	5.89065	4.66226	-1.30479	0.13011	NA	10.2276	4.18485
AAAS	721.513	689.165	740.441	752.654	794.644	758.421	708.664	0.0489893	0.675804	0.828479	725.943	753.91
AACS	163.46	116.55	224.866	175.176	211.171	164.938	186.491	0.137378	0.588186	0.773211	170.013	187.533
AAED1	249.875	271.105	323.011	256.12	251.204	238.571	349.67	0.0423577	0.838822	0.924299	275.028	279.815
AAGAB	1910.5	2223.32	2025.03	2097.28	1514.23	1995.46	2084.03	-0.145627	0.33288	0.566505	2064.03	1864.57
AAK1	5851.23	4393.43	4594.21	4354.04	9030.32	5513.65	7794.14	0.615634	6.61957e-06	0.00032148	4798.23	7446.04
AAMDC	197.817	207.763	248.47	184.841	147.119	142.848	143.365	-0.524025	0.0247721	0.112051	209.723	144.444
AAMP	1085.91	1691.24	1259.74	1215.36	1333.08	1307.72	1141.09	-0.042479	0.797072	0.899608	1313.06	1260.63
AANAT	135.349	182.426	537.938	240.414	99.0804	139.903	108.398	-1.14531	0.00542154	0.0404337	274.032	115.794
AAR2	582	603.019	500.667	589.559	502.407	639.136	525.67	-0.0364753	0.843963	0.926914	568.811	555.738
AARD	1.04114	2.53369	0	4.83245	1.00081	1.47266	16.3179	1.47556	0.276398	NA	2.10182	6.2638
AARS	672.579	686.631	550.361	1258.85	690.56	508.069	713.326	-0.335406	0.227084	0.456972	792.106	637.318
AARS2	215.517	195.094	200.018	240.414	225.183	192.919	227.285	0.0110092	0.941819	0.974543	212.761	215.129
AASDH	497.667	315.445	407.491	443.377	458.372	323.986	539.657	0.06572	0.693022	0.838347	415.995	440.672
AASDHPPT	740.254	591.618	588.874	734.532	594.482	497.76	578.121	-0.257735	0.132936	0.328548	663.82	556.788
AASS	236.34	91.213	131.689	142.557	306.248	92.7778	338.014	0.631824	0.028484	0.122838	150.45	245.68
AATBC	97.8676	209.03	93.1763	146.182	118.096	217.954	158.517	0.287213	0.41765	0.644481	136.564	164.856
AATF	2582.04	3488.9	2975.43	2713.42	2145.74	3144.14	2647	-0.151046	0.138572	0.336886	2939.95	2645.63
AATK	336.29	309.111	493.213	251.287	573.465	478.616	115.391	0.168289	0.766379	0.882381	347.475	389.157
ABALON	11.4526	29.1375	9.93881	4.83245	12.0097	26.5079	9.32453	0.161647	0.791468	0.897482	13.8403	15.9474
ABAT	1768.9	4171.73	2784.11	3545.81	2047.66	3812.72	2627.19	-0.0961188	0.708802	0.847229	3067.64	2829.19
ABCA1	7673.23	17454.6	36354.9	27706.9	10621.6	13659	11123	-0.758085	0.0287344	0.123443	22297.4	11801.2
ABCA10	149.925	114.016	140.386	164.303	121.098	58.9065	110.729	-0.574215	0.0259536	0.115236	142.157	96.9112
ABCA11P	78.0858	30.4043	60.8752	26.5785	94.0763	32.3986	54.7816	0.244563	0.475894	0.689966	48.986	60.4188
ABCA12	6.24687	0	0	0	1.00081	0	1.16557	-0.597424	0.677596	NA	1.56172	0.722126
ABCA13	2674.7	1156.63	3001.52	368.474	588.477	1745.11	307.709	-1.58752	0.135032	0.331372	1800.33	880.431
ABCA17P	6.24687	1.26685	1.24235	2.41623	7.00568	1.47266	4.66226	0.691596	0.460107	NA	2.79307	4.3802
ABCA2	1702.27	2182.78	3397.83	2656.64	2048.66	2207.52	979.075	-0.497221	0.17236	0.385777	2484.88	1745.09
ABCA3	102.032	49.407	55.9058	55.5732	164.133	45.6526	60.6094	0.387203	0.293173	0.529363	65.7295	90.1317
ABCA4	0	0	2.4847	2.41623	3.00244	0	1.16557	0.283558	0.865833	NA	1.22523	1.38933
ABCA5	2506.03	1736.85	2400.22	3092.77	2621.13	1384.3	2605.04	-0.167508	0.509632	0.714164	2433.97	2203.49
ABCA6	22.9052	15.2022	29.8164	33.8272	39.0317	27.9806	34.967	0.404928	0.609435	0.78585	25.4377	33.9931
ABCA7	5911.62	6364.64	5180.6	6107.01	6084.94	5594.65	3233.28	-0.252788	0.466655	0.683149	5890.97	4970.95
ABCA9	39.5635	31.6712	26.0894	45.9083	35.0284	42.7072	25.6424	-0.027741	0.967657	0.986406	35.8081	34.4594
ABCB1	507.037	73.4771	69.5717	200.547	491.399	195.864	446.412	1.08128	0.00371647	0.031237	212.658	377.891
ABCB10	1573.17	1136.36	1188.93	1090.93	1198.97	1304.78	1296.11	0.0269647	0.840515	0.92517	1247.35	1266.62
ABCB11	26.0286	8.86793	73.2987	18.1217	20.0162	11.7813	6.9934	-1.19143	0.139084	0.337519	31.5792	12.9303
ABCB4	52.0572	3.80054	177.656	21.746	44.0357	8.83598	58.2783	-1.13103	0.159523	0.36777	63.815	37.05
ABCB6	271.739	410.458	386.371	369.682	206.167	181.138	191.153	-0.871256	0.000330636	0.00558373	359.563	192.819
ABCB7	720.472	737.305	561.543	578.686	680.552	817.328	820.558	0.251278	0.0922702	0.263043	649.501	772.813
ABCB8	216.558	210.297	229.835	188.466	347.282	223.845	199.312	0.259378	0.25596	0.48937	211.289	256.813
ABCB9	13.5349	12.6685	21.12	50.7407	21.017	16.1993	36.1325	-0.0998219	0.872202	0.941622	24.516	24.4496
ABCC1	2003.16	1942.08	2143.06	2047.75	2587.1	2136.83	2669.15	0.277586	0.0864246	0.252605	2034.01	2464.36
ABCC10	673.62	689.165	616.206	633.051	730.593	686.261	611.922	0.0484724	0.764799	0.88137	653.011	676.259
ABCC11	178.036	10.1348	50.9364	107.522	29.0235	19.1446	3.4967	-2.10275	0.0136975	0.0762184	86.6572	17.2216
ABCC13	1.04114	10.1348	1.24235	0	2.00162	2.94533	2.33113	-0.342503	0.808703	NA	3.10457	2.42603
ABCC2	522.654	983.073	1108.18	984.612	492.399	608.21	559.472	-0.65156	0.00312607	0.0277941	899.629	553.36
ABCC3	1487.8	1023.61	300.649	1180.33	1205.98	1232.62	1257.65	0.318667	0.49083	0.701828	998.096	1232.08
ABCC4	1795.97	829.785	286.983	541.234	859.697	780.511	664.373	-0.0109784	0.982666	0.993439	863.494	768.194
ABCC5	3293.14	4370.62	2695.9	4531.63	4020.26	4949.62	3767.11	0.188049	0.605881	0.783793	3722.82	4245.66
ABCC5-AS1	3.12343	0	3.72705	1.20811	3.00244	0	1.16557	-0.496498	0.767769	NA	2.01465	1.38933
ABCC6	819.381	943.801	606.267	774.4	1140.93	862.981	790.254	0.245773	0.588595	0.773652	785.962	931.387
ABCC6P1	9.3703	5.06739	22.3623	3.62434	6.00487	2.94533	6.9934	-0.958111	0.322498	0.557243	10.1061	5.31453
ABCC8	0	0	8.69646	0	0	0	0	-2.06545	0.605401	NA	2.17411	0
ABCD1	200.941	297.709	371.463	306.861	229.186	237.099	150.358	-0.487505	0.164466	0.374026	294.243	205.548
ABCD2	297.767	93.7467	69.5717	147.39	615.499	254.771	543.154	1.68948	1.1227e-10	7.06486e-08	152.119	471.141
ABCD3	831.874	599.219	575.208	718.827	682.554	840.891	792.585	0.184278	0.188355	0.407518	681.282	772.01
ABCD4	1174.41	1035.01	1001.33	941.12	1224.99	1150.15	912.638	0.0789906	0.63199	0.801038	1037.97	1095.93
ABCE1	1093.2	880.459	713.109	1287.85	1111.9	899.797	1401.01	0.184915	0.324487	0.558974	993.654	1137.57
ABCF1	1453.44	2178.98	1318.13	1617.66	1867.51	2172.18	2391.74	0.398638	0.149006	0.35239	1642.05	2143.81
ABCF2	851.656	901.995	781.439	920.582	935.759	879.18	1081.65	0.153307	0.192172	0.412881	863.918	965.528
ABCF3	2425.87	2683.18	2156.72	2876.52	3465.81	3747.93	3022.31	0.418372	0.0200353	0.0977065	2535.57	3412.02
ABCG1	2117.69	3691.59	6345.93	5661.22	1927.56	2082.35	1746.02	-1.11121	0.000117062	0.00260023	4454.11	1918.64
ABCG2	19.7817	7.60108	1.24235	2.41623	30.0244	4.41799	8.15896	0.911089	0.266469	0.500182	7.76035	14.2004
ABCG4	1.04114	2.53369	1.24235	0	0	0	2.33113	-0.504408	0.825675	NA	1.2043	0.777044
ABHD1	34.3578	13.9353	16.1506	21.746	22.0179	45.6526	31.4703	0.628332	0.191909	0.41249	21.5474	33.0469
ABHD10	497.667	309.111	406.249	588.351	478.388	527.213	551.313	0.214358	0.335122	0.56823	450.344	518.971
ABHD11	157.213	222.965	206.23	244.039	151.123	136.958	163.179	-0.461601	0.0446119	0.16666	207.612	150.42
ABHD11-AS1	4.16458	1.26685	14.9082	2.41623	5.00406	1.47266	3.4967	-0.805348	0.442677	NA	5.68897	3.32447
ABHD12	310.261	329.38	273.317	347.936	366.297	337.24	362.491	0.17167	0.263787	0.49788	315.224	355.343
ABHD12B	644.468	770.243	1098.24	922.998	519.421	1138.37	868.347	-0.0580566	0.87229	0.941644	858.987	842.045
ABHD13	4114.6	4279.41	4631.48	4395.11	4500.65	5288.33	4584.17	0.13867	0.163383	0.372853	4355.15	4791.05
ABHD14A	34.3578	11.4016	16.1506	25.3704	38.0308	32.3986	30.3047	0.629885	0.0992264	0.275554	21.8201	33.578
ABHD14B	635.098	283.774	354.07	373.307	624.506	466.834	562.968	0.447594	0.00103397	0.0127135	411.562	551.436
ABHD15	349.825	129.218	198.776	171.552	334.271	231.208	301.882	0.476348	0.0437014	0.164268	212.343	289.12
ABHD16A	3905.33	5773.02	6519.86	4927.89	4627.75	5529.85	3619.08	-0.176067	0.307825	0.543706	5281.53	4592.23
ABHD16B	5.20572	10.1348	9.93881	10.873	6.00487	2.94533	8.15896	-0.567763	0.397281	0.627598	9.03808	5.70305
ABHD17A	137.431	77.2777	84.4799	65.2381	179.145	108.977	78.0929	0.419806	0.33048	0.564087	91.1067	122.072
ABHD17B	807.928	591.618	883.312	793.73	627.509	631.772	565.299	-0.337303	0.0943982	0.266979	769.147	608.194
ABHD17C	167.624	181.159	263.378	149.806	145.118	145.794	40.7948	-0.789437	0.134382	0.33046	190.492	110.569
ABHD2	11352.6	14343.2	20508.7	14185.7	22540.3	23341.7	19851.9	0.591433	0.0269323	0.118192	15097.6	21911.3
ABHD3	10181.4	10131	12526.6	7309.08	8475.87	9280.72	7045.85	-0.276425	0.130689	0.325434	10037	8267.48
ABHD4	2475.84	2357.6	2554.27	2549.12	2177.77	2432.84	2124.83	-0.14945	0.504068	0.710747	2484.21	2245.14
ABHD5	10670.7	12093.3	13873.3	12563.2	11759.5	13059.6	10347.9	-0.0585019	0.854836	0.932306	12300.1	11722.3
ABHD6	82.2504	81.0782	118.023	190.882	69.056	85.4145	95.5764	-0.50985	0.169695	0.381844	118.058	83.349
ABHD8	21.864	17.7359	24.847	15.7055	23.0187	32.3986	12.8212	0.163766	0.759252	0.877535	20.0381	22.7462
ABI1	9748.24	11271.1	13028.5	10636.2	8820.15	9760.81	9041.29	-0.262597	0.0321337	0.133201	11171	9207.42
ABI2	1030.73	571.348	444.762	681.376	1474.2	798.183	1465.12	0.854384	1.03953e-08	2.50939e-06	682.055	1245.83
ABI3	980.758	492.804	356.555	473.58	951.772	527.213	441.749	0.194105	0.585472	0.770815	575.924	640.245
ABI3BP	28.1109	10.1348	11.1812	14.4974	16.013	13.254	43.1259	0.6427	0.239359	0.471525	15.981	24.131
ABL1	735.048	796.847	764.046	712.786	784.636	790.82	660.876	-0.0105661	0.92998	0.969492	752.182	745.444
ABL2	1192.11	1214.91	1948.01	1313.22	1327.08	1351.9	1377.7	-0.0476332	0.771567	0.885762	1417.06	1352.23
ABLIM1	5294.22	1978.82	1622.51	1360.33	9199.46	3074.92	5337.13	1.19178	0.00010969	0.00247329	2563.97	5870.5
ABLIM2	6.24687	7.60108	11.1812	1.20811	21.017	4.41799	20.9802	1.07583	0.0912876	0.261653	6.5593	15.4717
ABLIM3	1877.18	1996.55	592.601	2132.32	768.623	1530.1	2110.84	-0.186286	0.709992	0.847602	1649.66	1469.85
ABO	35.3989	69.6766	33.5435	33.8272	36.0292	108.977	44.2915	0.50547	0.364864	0.596894	43.1115	63.0993
ABR	5105.77	6123.94	7639.22	5309.65	5614.55	8089.34	4776.49	0.0233623	0.906134	0.957402	6044.65	6160.13
ABRA	13.5349	3.80054	11.1812	6.04056	1.00081	10.3086	12.8212	-0.127597	0.853977	0.93189	8.63928	8.04356
ABRACL	1699.15	2258.79	1344.22	1640.62	1066.87	2210.47	1639.95	-0.109724	0.653348	0.814081	1735.69	1639.09
ABT1	543.477	506.739	407.491	425.256	587.476	509.541	493.034	0.172097	0.313477	0.54876	470.741	530.017
ABTB1	11495.3	10747.9	13987.6	8688.75	10969.9	11893.2	5070.21	-0.284854	0.462756	0.681084	11229.9	9311.11
ABTB2	120.773	321.779	211.2	165.511	223.181	353.439	255.259	0.520742	0.105738	0.285569	204.816	277.293
ACAA1	4323.87	5781.89	5552.07	3857.5	3641.95	6329.51	2926.74	-0.210257	0.236495	0.46825	4878.83	4299.4
ACAA2	1464.89	1121.16	951.641	1192.41	995.808	992.575	1004.72	-0.239709	0.162143	0.371262	1182.52	997.7
ACACA	533.066	364.852	465.882	431.296	414.336	435.908	557.14	0.0614659	0.76017	0.877881	448.774	469.128
ACACB	564.3	377.52	525.514	442.169	849.689	547.831	752.956	0.574261	0.0197188	0.0967071	477.376	716.825
ACAD10	1048.43	1247.84	1538.03	1227.44	1015.82	1116.28	1014.04	-0.263569	0.0426175	0.161227	1265.44	1048.71
ACAD11	39.5635	24.0701	17.3929	16.9136	59.0479	19.1446	29.1391	0.51683	0.161209	0.370156	24.485	35.7772
ACAD8	1636.68	1809.06	1826.26	1330.13	1462.19	2203.1	1298.44	-0.0115369	0.94667	0.976411	1650.53	1654.58
ACAD9	465.392	475.068	416.188	445.794	488.396	437.381	406.782	-0.0199765	0.868069	0.939447	450.61	444.187
ACADM	811.051	786.712	1018.73	977.363	575.467	652.39	728.479	-0.468754	0.0122722	0.0712749	898.464	652.112
ACADS	63.5098	46.8733	43.4823	51.9488	61.0495	39.7619	25.6424	-0.284599	0.381054	0.612815	51.4536	42.1513
ACADSB	829.792	700.566	711.867	601.64	944.766	768.73	970.916	0.323227	0.0631644	0.208499	710.966	894.804
ACADVL	10919.5	10343.8	9382.23	9957.26	11906.7	12333.6	8864.13	0.121764	0.462447	0.680936	10150.7	11034.8
ACAN	5.20572	3.80054	2.4847	4.83245	9.00731	14.7266	3.4967	1.1428	0.176315	0.391058	4.08085	9.07688
ACAP1	4252.03	6487.52	10558.7	5472.75	5238.25	7009.88	5318.48	-0.134992	0.551527	0.746135	6692.76	5855.53
ACAP2	18247.1	25596.6	29381.6	24159.8	19002.4	22337.4	18691	-0.256234	0.0675731	0.216643	24346.3	20010.3
ACAP3	385.223	450.998	453.458	368.474	516.419	462.416	354.332	0.1064	0.642407	0.806756	414.538	444.389
ACAT1	652.798	486.469	525.514	618.554	498.404	485.979	473.22	-0.231314	0.148484	0.351965	570.834	485.868
ACAT2	242.587	288.841	259.651	324.982	174.141	270.97	334.517	-0.10214	0.685467	0.833479	279.015	259.876
ACBD3	1584.62	1748.25	1805.14	1989.76	1369.11	1622.87	1575.85	-0.224708	0.0571259	0.196464	1781.94	1522.61
ACBD4	251.957	174.825	156.536	113.563	297.241	164.938	200.477	0.319385	0.17526	0.38946	174.22	220.886
ACBD5	1728.3	2087.76	1800.17	1797.67	1987.61	1880.59	1875.4	0.053776	0.572081	0.761862	1853.48	1914.53
ACBD6	316.508	530.809	673.354	489.286	298.242	556.667	452.24	-0.179564	0.44655	0.668014	502.489	435.716
ACBD7	58.3041	64.6092	310.588	147.39	22.0179	27.9806	19.8146	-2.58856	0.000233707	0.00432992	145.223	23.271
ACCS	492.461	388.922	472.093	366.058	807.655	521.323	657.379	0.60285	0.112397	0.296984	429.884	662.119
ACCSL	12.4937	36.7386	8.69646	4.83245	1.00081	13.254	9.32453	-1.09923	0.166281	0.376212	15.6903	7.85977
ACD	200.941	168.491	155.294	182.425	177.144	117.813	130.543	-0.332106	0.0722394	0.226282	176.788	141.833
ACE	20.8229	13.9353	63.3599	19.3298	33.0268	22.0899	87.4174	0.632899	0.317002	0.552338	29.362	47.5114
ACE2	20.8229	29.1375	58.3905	44.7002	27.0219	47.1252	30.3047	-0.0876182	0.81872	0.912809	38.2628	34.8173
ACER1	27.0698	7.60108	6.21175	7.24868	40.0325	2.94533	12.8212	0.544956	0.35116	0.583607	12.0328	18.5997
ACER2	51.0161	25.3369	26.0894	18.1217	65.0528	45.6526	53.616	0.876575	0.0171117	0.0883645	30.141	54.7738
ACER3	1737.67	3250.73	2967.98	2644.56	1230	2896.73	2283.34	-0.316367	0.0879858	0.2554	2650.23	2136.69
ACIN1	11919	15292.1	16746.9	14104.7	11853.6	13337.9	11471.5	-0.231826	0.00138206	0.0158426	14515.7	12221
ACKR1	0	5.06739	1.24235	1.20811	3.00244	4.41799	3.4967	0.855495	0.585003	NA	1.87946	3.63904
ACKR2	4.16458	7.60108	1.24235	1.20811	9.00731	7.36332	5.82783	1.05569	0.165627	0.37527	3.55403	7.39948
ACKR3	60.3864	13.9353	9.93881	66.4462	31.0252	22.0899	32.6358	-0.250024	0.682648	0.832336	37.6767	28.5837
ACKR4	73.9213	48.1402	57.1481	80.9435	86.0698	51.5432	83.9207	0.162677	0.551829	0.746213	65.0383	73.8446
ACLY	3253.58	4085.58	4082.37	3518.02	2891.34	3774.44	2988.51	-0.21039	0.0328453	0.135259	3734.89	3218.1
ACMSD	14.576	11.4016	9.93881	15.7055	23.0187	4.41799	16.3179	0.111802	0.815095	0.910251	12.9055	14.5849
ACO1	670.497	1337.79	1641.15	1472.69	694.563	425.6	600.266	-1.07741	0.00621186	0.0445906	1280.53	573.476
ACO2	748.583	970.405	950.398	1035.35	789.64	902.742	875.34	-0.108668	0.499381	0.707857	926.185	855.908
ACOT1	47.8926	26.6038	23.6047	7.24868	25.0203	32.3986	9.32453	-0.226414	0.735369	0.86142	26.3374	22.2478
ACOT11	14.576	2.53369	6.21175	1.20811	18.0146	8.83598	5.82783	0.919893	0.280624	0.515955	6.1324	10.8928
ACOT12	1.04114	11.4016	0	6.04056	3.00244	1.47266	2.33113	-0.904832	0.50729	NA	4.62083	2.26874
ACOT13	963.059	1292.18	1229.93	1060.72	886.719	1288.58	944.108	-0.127645	0.246469	0.479581	1136.47	1039.8
ACOT2	156.172	70.9434	79.5105	113.563	191.155	100.141	134.04	0.42989	0.0292866	0.124835	105.047	141.779
ACOT4	31.2343	2.53369	2.4847	15.7055	21.017	10.3086	19.8146	0.582537	0.340078	0.572459	12.9895	17.0468
ACOT7	92.6619	44.3396	24.847	39.8677	63.0511	22.0899	38.4637	-0.288034	0.539073	0.737763	50.4291	41.2016
ACOT8	284.232	348.383	366.494	332.231	254.206	304.841	223.789	-0.346473	0.104934	0.284427	332.835	260.945
ACOT9	2224.93	3768.87	3293.47	3333.18	2213.8	1862.92	1671.42	-0.670287	0.00371604	0.031237	3155.11	1916.05
ACOX1	13672.3	13975.9	14480.8	15245.2	11850.6	11891.8	10163.7	-0.341369	0.249671	0.482935	14343.5	11302
ACOX2	10.4114	25.3369	22.3623	21.746	4.00325	41.2346	9.32453	-0.437146	0.418234	0.644994	19.9642	18.1874
ACOX3	171.789	178.625	206.23	205.379	203.165	212.063	181.828	0.0700329	0.679433	0.830765	190.506	199.019
ACOXL	37.4812	69.6766	57.1481	148.598	37.03	39.7619	30.3047	-1.11444	0.0750502	0.231439	78.2259	35.6989
ACP1	1592.95	1169.3	858.464	1342.21	1484.2	1365.16	1519.9	0.245179	0.0794541	0.239794	1240.73	1456.42
ACP2	307.138	415.526	327.981	442.169	214.174	321.041	285.564	-0.450552	0.0162699	0.0855459	373.203	273.593
ACP5	204.064	190.027	291.952	233.166	224.182	223.845	283.233	0.0703663	0.828885	0.918174	229.802	243.753
ACP6	382.1	305.31	345.374	300.82	307.249	275.388	228.451	-0.301766	0.304394	0.540639	333.401	270.363
ACPP	2625.77	2099.17	1541.76	2102.12	3554.88	2456.4	2831.16	0.511269	0.0749683	0.231346	2092.2	2947.48
ACPT	6.24687	1.26685	3.72705	7.24868	1.00081	19.1446	5.82783	0.715045	0.431111	0.655965	4.62236	8.65775
ACRBP	3382.68	2911.21	1308.2	3216	2075.68	1518.32	2455.85	-0.420883	0.318292	0.553587	2704.52	2016.62
ACRC	575.753	508.006	515.576	448.21	450.365	569.921	467.392	-0.0509833	0.775133	0.887452	511.886	495.893
ACRV1	5.20572	8.86793	2.4847	2.41623	0	2.94533	3.4967	-1.20459	0.316958	NA	4.74364	2.14734
ACSBG1	85.3738	39.2723	18.6353	61.6137	42.0341	27.9806	89.7486	0.0798328	0.877593	0.94405	51.2238	53.2544
ACSBG2	16.6583	8.86793	13.6659	19.3298	12.0097	8.83598	16.3179	-0.253399	0.629977	0.799822	14.6305	12.3879
ACSF2	212.393	254.636	291.952	351.561	251.204	220.899	313.537	-0.126743	0.69401	0.838646	277.636	261.88
ACSF3	270.698	267.305	245.985	302.028	329.267	251.825	259.921	0.0396709	0.837018	0.923178	271.504	280.338
ACSL1	96259	193526	280996	197386	70479.2	207232	97025.2	-0.659846	0.0272518	0.119154	192042	124912
ACSL3	1824.08	3713.13	4560.67	3940.86	1775.44	3213.35	2275.18	-0.496778	0.000998444	0.0124163	3509.69	2421.33
ACSL4	7712.8	13570.5	19589.4	12992	5704.63	10871.2	9529.67	-0.577663	0.00911962	0.0579732	13466.2	8701.83
ACSL5	3053.68	3908.22	3031.34	2962.29	3049.47	3236.91	2901.09	-0.0708287	0.634948	0.802731	3238.88	3062.49
ACSL6	331.084	111.483	54.6634	80.9435	530.43	210.591	342.676	1.41889	0.00407659	0.0332654	144.543	361.232
ACSM1	20.8229	12.6685	28.5741	4.83245	29.0235	14.7266	19.8146	0.337141	0.449762	0.670894	16.7245	21.1883
ACSM3	56.2218	34.2049	21.12	41.0758	88.0714	73.6332	100.239	1.20011	1.49132e-06	0.00010417	38.1556	87.3144
ACSM4	18.7406	6.33424	48.4517	14.4974	3.00244	4.41799	0	-3.23244	0.00307536	0.0274508	22.006	2.47347
ACSM6	0	0	2.4847	0	1.00081	0	2.33113	0.668213	0.723498	NA	0.621175	1.11065
ACSS1	2106.24	1360.59	1150.42	1646.66	2104.71	1524.21	1756.51	0.204331	0.103579	0.282099	1565.98	1795.14
ACSS2	2399.84	3813.21	4088.58	2412.6	2279.85	3331.16	2452.35	-0.213418	0.126415	0.318702	3178.56	2687.79
ACSS3	20.8229	65.876	21.12	66.4462	15.0122	113.395	66.4373	0.467591	0.393953	0.624203	43.5663	64.9482
ACTA2	204.064	315.445	387.613	141.349	198.161	176.72	171.338	-0.46027	0.0860608	0.251951	262.118	182.073
ACTA2-AS1	18.7406	20.2696	34.7858	32.619	59.0479	29.4533	40.7948	0.634816	0.134378	0.33046	26.6038	43.0987
ACTB	186490	242388	212717	159843	135845	223622	136367	-0.301435	0.0854214	0.251154	200359	165278
ACTG1	31622.7	30990.9	31004.1	26063.8	23002.7	35383.7	23657.5	-0.150396	0.37116	0.603672	29920.4	27347.9
ACTG1P17	84.3327	20.2696	26.0894	47.1164	75.0609	47.1252	40.7948	0.392147	0.255054	0.488817	44.452	54.327
ACTG1P20	450.816	456.065	525.514	607.681	700.568	759.894	617.75	0.443296	0.0185747	0.0929056	510.019	692.737
ACTG1P4	44.7692	40.5391	59.6328	44.7002	47.0381	55.9612	46.6226	0.0659208	0.838987	0.924299	47.4103	49.874
ACTG2	0	0	0	1.20811	3.00244	0	1.16557	1.40573	0.519669	NA	0.302028	1.38933
ACTL10	1.04114	0	3.72705	4.83245	10.0081	1.47266	1.16557	0.512569	0.670105	NA	2.40016	4.21545
ACTL6A	666.332	504.205	432.338	589.559	634.515	553.721	623.578	0.145296	0.377591	0.610086	548.109	603.938
ACTN1	14654.1	21146.2	27037.3	15146.1	15541.6	20696.8	11743.1	-0.251628	0.307611	0.543592	19495.9	15993.8
ACTN1-AS1	7.28801	3.80054	0	2.41623	4.00325	5.89065	3.4967	0.476275	0.673031	NA	3.37619	4.46353
ACTN2	1.04114	1.26685	0	6.04056	0	0	0	-3.25534	0.141022	NA	2.08714	0
ACTN3	5.20572	0	1.24235	3.62434	0	0	2.33113	-1.41422	0.343152	NA	2.5181	0.777044
ACTN4	4564.38	5735.02	6304.93	5092.19	4877.96	5789.04	4029.36	-0.131814	0.416217	0.643394	5424.13	4898.79
ACTR10	2582.04	3004.96	2461.1	2452.47	2071.68	2929.13	2074.71	-0.164675	0.159018	0.367181	2625.14	2358.5
ACTR1A	3609.65	4322.48	4428.98	3601.38	3554.88	5054.18	3817.23	0.0500924	0.691488	0.83755	3990.62	4142.1
ACTR1B	950.565	711.968	750.38	518.28	1116.91	862.981	749.459	0.311244	0.155713	0.361533	732.798	909.782
ACTR2	47054.5	60698.4	64863.1	51971.8	41420.6	63278.9	51647.4	-0.106187	0.522371	0.723666	56147	52115.6
ACTR3	28932.4	34915.6	36651.8	31966.7	29311.8	39278.9	35221.1	0.0700366	0.585865	0.771147	33116.6	34603.9
ACTR3B	203.023	207.763	80.7528	167.928	181.147	134.012	219.126	0.121474	0.706623	0.846208	164.867	178.095
ACTR3C	41.6458	51.9407	44.7246	47.1164	36.0292	57.4339	43.1259	-0.0433253	0.870027	0.940624	46.3569	45.5297
ACTR5	323.796	259.704	224.866	303.236	443.36	329.877	461.564	0.54846	0.000940782	0.0118701	277.9	411.6
ACTR6	588.247	416.793	534.211	451.834	465.377	431.49	572.293	-0.0282751	0.850663	0.930164	497.771	489.72
ACTR8	566.383	641.025	677.081	784.065	493.4	848.254	624.743	-0.038968	0.844522	0.927179	667.138	655.466
ACTRT3	2.08229	1.26685	7.45411	8.45679	2.00162	4.41799	6.9934	-0.0895181	0.936602	NA	4.81501	4.471
ACVR1	739.213	710.701	463.397	645.132	662.537	758.421	877.671	0.26281	0.234788	0.466438	639.611	766.21
ACVR1B	1630.43	2009.22	3102.15	2486.3	1156.94	2088.24	1501.25	-0.55577	0.0313571	0.13104	2307.02	1582.14
ACVR1C	191.571	65.876	40.9976	71.2786	507.412	103.086	280.901	1.59064	0.000939756	0.0118662	92.4307	297.133
ACVR2A	527.86	495.337	221.138	223.501	745.605	614.101	705.167	0.91153	0.00258937	0.0245893	366.959	688.291
ACVR2B	336.29	155.822	144.113	164.303	510.414	213.536	432.425	0.933371	0.0210508	0.10089	200.132	385.458
ACVR2B-AS1	8.32916	3.80054	1.24235	3.62434	8.00649	4.41799	3.4967	0.358356	0.682612	NA	4.2491	5.30706
ACVRL1	33.3166	63.3424	119.266	59.1975	14.0114	26.5079	23.3113	-1.63855	3.58458e-05	0.0010937	68.7805	21.2769
ACY3	8.32916	0	0	12.0811	4.00325	1.47266	2.33113	-0.888712	0.416526	NA	5.10257	2.60235
ACYP1	252.998	152.022	134.174	211.42	314.255	148.739	250.597	0.313948	0.142976	0.343675	187.653	237.864
ACYP2	98.9087	81.0782	52.1787	54.3651	70.0568	63.3245	74.5962	-0.0424467	0.885797	0.948082	71.6327	69.3258
ADA	609.069	145.687	122.993	450.626	560.455	294.533	473.22	0.552496	0.0803294	0.241584	332.094	442.736
ADAD2	0	0	0	4.83245	0	1.47266	1.16557	-0.408734	0.835355	NA	1.20811	0.87941
ADAL	135.349	115.283	89.4493	126.852	125.101	116.34	141.033	0.12794	0.53128	0.730949	116.733	127.492
ADAM10	8172.98	10487	11997.4	9035.47	8076.55	11460.3	9720.82	-0.0167906	0.905058	0.956924	9923.2	9752.54
ADAM11	17.6995	2.53369	12.4235	7.24868	20.0162	4.41799	5.82783	-0.00112641	0.998666	0.999718	9.97633	10.0874
ADAM12	22.9052	26.6038	9.93881	14.4974	39.0317	41.2346	39.6292	1.12387	0.0234144	0.108154	18.4863	39.9652
ADAM15	1073.42	1223.77	954.126	726.076	1033.84	1792.23	928.956	0.307669	0.174527	0.388771	994.349	1251.68
ADAM17	9188.1	6205.02	10512.8	6174.66	5410.39	6258.82	4627.3	-0.569846	0.0126047	0.0724968	8020.14	5432.17
ADAM19	9048.59	7062.67	11873.1	12938.9	7951.45	10501.6	8214.91	-0.210809	0.503737	0.710747	10230.8	8889.31
ADAM1A	371.689	160.89	260.894	210.212	374.304	253.298	277.405	0.275608	0.345485	0.578029	250.921	301.669
ADAM20	20.8229	15.2022	12.4235	16.9136	25.0203	19.1446	20.9802	0.412458	0.455396	0.675766	16.3405	21.715
ADAM20P1	62.4687	58.275	67.087	59.1975	99.0804	64.7972	86.2519	0.431205	0.0984972	0.274253	61.757	83.3765
ADAM21	7.28801	0	6.21175	8.45679	13.0106	4.41799	8.15896	0.608053	0.345996	0.578599	5.48914	8.52917
ADAM22	192.612	72.2103	91.934	95.4409	240.195	128.122	187.656	0.725843	0.000823188	0.0106904	113.049	185.324
ADAM23	38.5223	15.2022	11.1812	49.5326	114.093	45.6526	371.816	2.49334	0.000303675	0.00529737	28.6096	177.187
ADAM28	2298.85	1193.37	3575.49	2553.95	2054.67	851.199	1906.87	-0.723636	0.0522138	0.184997	2405.41	1604.24
ADAM30	0	1.26685	0	0	0	5.89065	4.66226	3.11481	0.089693	NA	0.316712	3.51764
ADAM32	4.16458	8.86793	7.45411	7.24868	3.00244	5.89065	4.66226	-0.593323	0.455948	0.676219	6.93382	4.51845
ADAM33	0	0	1.24235	0	3.00244	5.89065	0	2.89712	0.135199	NA	0.310588	2.96436
ADAM8	5804.38	9047.82	9959.93	4852.99	7534.11	9126.09	4232.17	-0.0632313	0.834746	0.922037	7416.28	6964.12
ADAM9	2187.44	4292.08	7059.04	3516.82	1498.22	4161.75	2915.08	-0.5566	0.014361	0.078789	4263.84	2858.35
ADAMDEC1	17.6995	64.6092	77.0258	22.9541	10.0081	26.5079	30.3047	-0.892144	0.0531854	0.187147	45.5721	22.2736
ADAMTS1	132.225	22.8032	36.0282	80.9435	69.056	38.2892	116.557	0.23894	0.660481	0.819668	68.0001	74.6339
ADAMTS10	205.105	34.2049	24.847	78.5273	296.24	107.504	223.789	1.51304	0.000949247	0.0119291	85.6712	209.178
ADAMTS13	15.6172	16.469	14.9082	19.3298	33.0268	19.1446	11.6557	0.353241	0.422325	0.648804	16.581	21.2757
ADAMTS14	30.1932	3.80054	4.9694	9.6649	28.0227	17.672	11.6557	0.941246	0.150522	0.354545	12.157	19.1168
ADAMTS15	0	0	0	0	0	0	0	0	1	NA	0	0
ADAMTS16	4.16458	0	2.4847	2.41623	4.00325	0	2.33113	-0.181492	0.866373	NA	2.26638	2.11146
ADAMTS17	58.3041	45.6065	24.847	15.7055	99.0804	41.2346	53.616	0.756537	0.204679	0.42896	36.1158	64.6437
ADAMTS2	1482.59	1659.57	2102.06	2436.76	223.181	555.194	25.6424	-2.99755	0.000871921	0.011208	1920.25	268.006
ADAMTS3	0	5.06739	24.847	15.7055	0	10.3086	1.16557	-2.17045	0.0916816	0.262233	11.405	3.82474
ADAMTS4	8.32916	3.80054	9.93881	0	20.0162	10.3086	16.3179	1.46792	0.0195624	0.0962291	5.51713	15.5476
ADAMTS5	2.08229	11.4016	8.69646	16.9136	30.0244	29.4533	69.934	2.22962	0.000206173	0.00394904	9.77349	43.1372
ADAMTS6	43.7281	34.2049	73.2987	49.5326	29.0235	27.9806	46.6226	-0.550675	0.175162	0.389345	50.1911	34.5423
ADAMTS7P1	1.04114	1.26685	0	2.41623	18.0146	8.83598	16.3179	3.58804	0.0040744	0.0332654	1.18105	14.3895
ADAMTS8	4.16458	1.26685	1.24235	0	11.0089	4.41799	4.66226	2.04456	0.0285079	NA	1.66844	6.69639
ADAMTSL4	6140.67	7750.57	10189.8	8437.46	4625.75	6553.35	3933.78	-0.687389	0.00675574	0.0473306	8129.62	5037.63
ADAMTSL4-AS1	500.79	582.75	683.293	728.492	431.35	537.522	386.968	-0.462427	0.0732564	0.227963	623.831	451.947
ADAMTSL5	19.7817	16.469	6.21175	10.873	48.039	16.1993	34.967	1.22078	0.0236884	0.108798	13.3339	33.0684
ADAP1	739.213	985.607	1074.63	639.092	629.511	867.399	474.385	-0.382266	0.187733	0.406603	859.636	657.098
ADAP2	673.62	1702.64	1241.11	1222.61	388.315	1375.47	969.751	-0.444029	0.125339	0.317555	1210	911.178
ADAR	44709.9	81185.9	111738	77055.8	44953.5	54808.1	45320.7	-0.617996	0.00137445	0.0157774	78672.5	48360.8
ADARB1	1068.21	813.316	940.46	492.91	1538.25	961.649	1223.84	0.561076	0.0620838	0.206548	828.725	1241.25
ADARB2	307.138	666.362	1.24235	317.734	288.234	533.104	125.881	-0.522847	0.78382	0.892525	323.119	315.74
ADAT1	1083.83	874.124	977.73	920.582	1491.21	1156.04	1331.08	0.457362	0.0937025	0.265698	964.067	1326.11
ADAT2	973.47	444.663	488.244	484.453	1318.07	731.914	1176.06	0.85184	1.84229e-08	3.82801e-06	597.708	1075.35
ADAT3	5.20572	22.8032	16.1506	10.873	10.0081	11.7813	5.82783	-0.441846	0.42901	0.654236	13.7581	9.20575
ADCK1	415.417	177.359	84.4799	122.019	394.32	147.266	138.702	0.260748	0.60559	0.783781	199.819	226.763
ADCK2	181.159	125.418	144.113	101.481	210.17	157.575	110.729	0.211061	0.463772	0.681602	138.043	159.491
ADCK3	1049.47	1494.88	981.457	953.201	1206.98	1384.3	1138.76	0.158199	0.467565	0.683871	1119.75	1243.35
ADCK4	534.107	629.623	807.528	529.153	430.349	444.744	322.862	-0.629675	0.0141535	0.0780418	625.103	399.318
ADCK5	39.5635	35.4717	33.5435	25.3704	60.0487	44.1799	29.1391	0.400329	0.37761	0.610086	33.4873	44.4559
ADCY1	4.16458	0	3.72705	0	3.00244	4.41799	2.33113	0.736604	0.560826	NA	1.97291	3.25052
ADCY10	81.2093	35.4717	49.694	86.9841	70.0568	100.141	83.9207	0.466195	0.172219	0.385514	63.3398	84.7062
ADCY10P1	2856.9	4596.12	3771.78	2831.82	2221.8	3314.96	1887.05	-0.509489	0.00654069	0.0462782	3514.15	2474.61
ADCY3	352.948	755.041	713.109	332.231	391.317	653.862	292.557	-0.244946	0.364214	0.596247	538.332	445.912
ADCY4	1019.28	2148.57	2144.3	1723.98	806.654	1247.35	622.412	-0.941453	1.5217e-06	0.000105842	1759.03	892.137
ADCY5	18.7406	6.33424	7.45411	8.45679	24.0195	5.89065	23.3113	0.785185	0.0869001	0.253549	10.2464	17.7405
ADCY6	31.2343	17.7359	8.69646	47.1164	20.0162	27.9806	24.4769	-0.108247	0.859561	0.935036	26.1958	24.1579
ADCY7	14185.6	16529.8	19514.8	16945	14346.6	14775.2	13323.6	-0.236448	0.0171212	0.0883645	16793.8	14148.5
ADCY9	195.735	182.426	223.623	172.76	265.215	272.443	290.226	0.506521	0.115097	0.30153	193.636	275.961
ADD1	10215.7	9717.98	13355.3	9544.09	9258.51	11218.7	8561.08	-0.144881	0.338562	0.57123	10708.3	9679.45
ADD2	36.4401	10.1348	55.9058	13.2892	57.0463	11.7813	54.7816	0.244008	0.745193	0.867912	28.9425	41.2031
ADD3	14990.4	15598.7	17953.2	16696.1	15436.5	15972.5	15119.7	-0.0656421	0.779151	0.889965	16309.6	15509.6
ADD3-AS1	43.7281	89.9461	78.2681	65.2381	29.0235	44.1799	38.4637	-0.86453	0.0453765	0.168825	69.2951	37.2224
ADGB	1.04114	38.0054	37.2705	26.5785	8.00649	11.7813	5.82783	-1.25782	0.0973294	0.272313	25.7239	8.53854
ADGRA2	98.9087	30.4043	86.9646	91.8166	61.0495	55.9612	127.047	0.0391604	0.93225	0.970532	77.0235	81.3525
ADGRA3	67.6744	13.9353	24.847	24.1623	56.0455	26.5079	58.2783	0.592527	0.273565	0.508499	32.6547	46.9439
ADGRB1	6.24687	16.469	6.21175	14.4974	21.017	23.5626	10.4901	0.732293	0.173606	0.387405	10.8562	18.3566
ADGRB2	8.32916	2.53369	1.24235	1.20811	9.00731	8.83598	6.9934	1.33995	0.061792	0.205921	3.32833	8.27889
ADGRB3	0	5.06739	3.72705	3.62434	6.00487	1.47266	1.16557	-0.398482	0.744559	0.867481	3.10469	2.88103
ADGRD1	34.3578	26.6038	11.1812	25.3704	48.039	79.5238	66.4373	1.40442	0.000469053	0.00720058	24.3783	64.6667
ADGRE1	974.511	3216.52	7040.4	1092.13	1510.22	3484.32	2995.5	0.147127	0.773046	0.886266	3080.89	2663.35
ADGRE2	8759.15	15339	29927	10658	11867.6	16971	10949.3	-0.15593	0.604317	0.782941	16170.8	13262.6
ADGRE3	6082.37	7854.45	4775.6	7544.66	10249.3	11315.9	10456.3	0.698401	0.0541117	0.189241	6564.27	10673.8
ADGRE4P	1529.44	186.227	1745.5	135.309	3263.65	1391.67	2291.5	1.31696	0.125962	0.31823	899.12	2315.61
ADGRE5	41027.3	37350.5	45373.1	23855.4	58090.1	42100.5	30973.7	0.26447	0.497154	0.706134	36901.6	43721.5
ADGRF3	66.6332	63.3424	67.087	80.9435	87.0706	58.9065	57.1127	-0.0604058	0.859936	0.935244	69.5015	67.6966
ADGRG1	1936.53	277.44	285.741	782.857	1492.21	908.633	1258.81	0.888534	0.0794169	0.23977	820.641	1219.88
ADGRG2	27.0698	60.8087	54.6634	62.8219	31.0252	51.5432	26.808	-0.465275	0.179901	0.395894	51.3409	36.4588
ADGRG3	11288.1	26436.6	29866.1	21512.9	20962	29696.3	14893.6	0.0664812	0.83887	0.924299	22275.9	21850.6
ADGRG5	535.148	98.8141	144.113	419.215	520.422	397.619	708.664	1.00582	0.0126189	0.0725021	299.323	542.235
ADGRG6	1.04114	3.80054	3.72705	1.20811	1.00081	4.41799	5.82783	0.66542	0.428369	0.653806	2.44421	3.74888
ADGRL1	515.366	483.936	446.004	408.342	751.61	415.291	458.067	0.20014	0.444014	0.666225	463.412	541.656
ADGRL2	0	6.33424	1.24235	1.20811	1.00081	0	1.16557	-2.25989	0.276123	NA	2.19617	0.722126
ADGRV1	22.9052	44.3396	37.2705	53.157	44.0357	80.9965	67.6028	0.704071	0.142946	0.343653	39.4181	64.2117
ADH1A	2.08229	0	0	0	0	0	2.33113	0.951294	0.723981	NA	0.520572	0.777044
ADH4	6.24687	6.33424	0	4.83245	5.00406	1.47266	1.16557	-0.990379	0.494335	NA	4.35339	2.54743
ADH5	1440.94	1517.68	1197.63	1414.7	1116.91	1466.77	1390.52	-0.0733891	0.575851	0.764835	1392.74	1324.73
ADH6	20.8229	1.26685	4.9694	12.0811	17.0138	8.83598	24.4769	0.915553	0.0585172	0.199241	9.78507	16.7756
ADHFE1	545.56	271.105	206.23	345.52	644.523	587.593	608.425	0.891713	0.00074855	0.00991743	342.104	613.514
ADI1	1426.37	1370.73	1196.38	1221.4	1412.15	1749.52	1563.02	0.268816	0.0134543	0.0755052	1303.72	1574.9
ADIPOR1	13077.8	19257.3	15480.9	16552.4	13535	24412.3	15533.5	0.12075	0.550681	0.745827	16092.1	17826.9
ADIPOR2	3282.73	3406.55	4063.73	3219.62	2928.38	3447.5	3387.13	-0.101383	0.505326	0.711217	3493.16	3254.34
ADIRF	9.3703	1.26685	3.72705	7.24868	9.00731	5.89065	5.82783	0.410512	0.51774	0.720413	5.40322	6.9086
ADK	402.923	304.043	703.171	695.873	436.354	279.806	769.273	-0.116653	0.746625	0.868717	526.502	495.144
ADM	1268.11	7616.28	6537.25	1975.26	1465.19	9121.68	3204.14	0.111577	0.786858	0.894603	4349.23	4597
ADM2	37.4812	110.216	64.6022	47.1164	34.0276	60.3792	16.3179	-0.807216	0.0718714	0.225448	64.8539	36.9082
ADM5	40.6046	26.6038	22.3623	14.4974	63.0511	32.3986	33.8014	0.705714	0.046802	0.172139	26.017	43.0837
ADNP	4640.38	4607.52	5091.15	4954.47	4933	4942.26	4918.69	0.0357741	0.751596	0.872151	4823.38	4931.32
ADNP-AS1	319.631	368.652	359.039	410.758	613.498	559.612	547.816	0.653508	1.39686e-08	3.15719e-06	364.52	573.642
ADNP2	1471.14	1520.22	1249.81	1447.32	1626.32	1751	1782.15	0.269843	0.131955	0.327098	1422.12	1719.82
ADO	563.259	497.871	495.698	490.494	552.448	639.136	758.783	0.341794	0.0150559	0.0813772	511.83	650.122
ADORA1	0	0	1.24235	0	0	0	0	-0.673304	0.80809	NA	0.310588	0
ADORA2A	63.5098	96.2804	119.266	91.8166	261.212	455.053	335.683	1.93577	0.00102132	0.0126337	92.7181	350.649
ADORA2A-AS1	179.077	255.903	296.922	239.206	500.406	1210.53	786.757	1.7197	0.00154007	0.0171602	242.777	832.564
ADORA2B	49.9749	49.407	28.5741	53.157	47.0381	66.2698	65.2717	0.391317	0.174287	0.388502	45.2782	59.5266
ADORA3	246.751	68.4097	161.506	276.658	99.0804	107.504	124.716	-0.744088	0.189028	0.408275	188.331	110.433
ADPGK	6493.62	8408.06	7486.41	7572.45	6617.37	8740.26	7695.07	0.0417196	0.528841	0.729503	7490.13	7684.23
ADPGK-AS1	95.7853	126.685	172.687	142.557	102.083	129.594	131.709	-0.118482	0.578241	0.766204	134.429	121.129
ADPRH	288.397	661.294	797.589	489.286	182.148	340.185	334.517	-0.929352	0.000227887	0.00424122	559.142	285.617
ADPRHL1	14.576	25.3369	6.21175	36.2434	26.0211	36.8166	10.4901	0.238412	0.704913	0.845226	20.592	24.4426
ADPRHL2	774.611	755.041	644.78	566.605	518.42	540.467	357.829	-0.534596	0.0119628	0.0697956	685.259	472.239
ADPRM	558.053	521.941	581.42	547.275	827.671	435.908	573.458	0.0928269	0.711643	0.848585	552.172	612.346
ADRA2A	21.864	19.0027	21.12	33.8272	8.00649	11.7813	27.9736	-0.584372	0.283178	0.519024	23.9535	15.9205
ADRA2B	1.04114	2.53369	2.4847	3.62434	0	2.94533	3.4967	-0.112935	0.934274	NA	2.42097	2.14734
ADRB1	27.0698	39.2723	24.847	6.04056	32.026	11.7813	41.9604	0.305528	0.708901	0.847284	24.3074	28.5892
ADRB2	466.433	386.388	395.068	422.839	336.273	630.3	402.12	0.108672	0.610067	0.786312	417.682	456.231
ADRBK1	8630.05	12605.1	15534.4	9515.09	11696.5	13198	8339.62	-0.0267794	0.895884	0.952889	11571.2	11078
ADRBK2	2625.77	4945.77	3661.21	3669.04	2323.88	4385.59	4297.44	-0.0166278	0.945425	0.975679	3725.45	3668.97
ADRM1	482.05	717.035	606.267	529.153	449.364	553.721	375.312	-0.330951	0.0857827	0.251666	583.626	459.466
ADSL	1659.58	1301.05	1160.36	1418.32	1406.14	1500.64	1629.46	0.130955	0.258876	0.492543	1384.83	1512.08
ADSS	2645.55	2837.74	2382.83	2075.54	2209.79	3089.65	2592.22	0.0765436	0.755203	0.874886	2485.41	2630.55
ADSSL1	15.6172	21.5364	14.9082	9.6649	38.0308	25.0353	17.4835	0.795723	0.0873969	0.25441	15.4317	26.8499
ADTRP	903.713	243.235	118.023	128.06	989.803	512.487	547.816	1.17874	0.00367988	0.0310248	348.258	683.368
AEBP1	108.279	34.2049	192.564	28.9947	130.106	25.0353	55.9472	-0.675704	0.258847	0.492543	91.0107	70.3627
AEBP2	1223.34	904.529	901.947	897.628	1550.26	1153.1	1566.52	0.52818	0.000100265	0.00229227	981.862	1423.29
AEN	641.345	340.782	449.731	634.259	833.676	480.088	742.465	0.389882	0.0685694	0.21854	516.529	685.41
AES	3275.44	2118.17	1868.5	1964.39	3920.18	2555.07	3168.01	0.46959	0.00936481	0.0590558	2306.62	3214.42
AFAP1	532.025	449.731	330.465	279.074	680.552	597.901	544.319	0.610241	0.128913	0.322576	397.824	607.591
AFAP1-AS1	20.8229	13.9353	4.9694	24.1623	32.026	11.7813	17.4835	0.322051	0.603637	0.782493	15.9725	20.4303
AFAP1L1	1.04114	13.9353	3.72705	14.4974	1.00081	4.41799	2.33113	-1.70002	0.150463	0.354545	8.30022	2.58331
AFAP1L2	72.8801	45.6065	55.9058	33.8272	65.0528	45.6526	46.6226	0.0128903	0.973937	0.989226	52.0549	52.4426
AFF1	7991.82	13222.1	20182	13413.7	11104	11881.4	13450.6	-0.097198	0.611432	0.787313	13702.4	12145.4
AFF2	256.122	200.162	401.279	233.166	135.11	209.118	156.186	-0.73559	0.0815132	0.243657	272.682	166.805
AFF3	290.479	103.881	677.081	144.974	303.246	144.321	312.372	-0.391681	0.511883	0.716005	304.104	253.313
AFF4	7483.75	7445.26	10223.3	9521.14	9359.59	8385.34	8723.09	0.032423	0.813438	0.909257	8668.36	8822.68
AFG3L1P	1073.42	895.661	773.985	816.684	1141.93	971.958	1029.19	0.232235	0.174774	0.389059	889.937	1047.69
AFG3L2	760.035	656.227	565.27	776.816	744.604	695.097	870.678	0.15485	0.269191	0.503448	689.587	770.126
AFMID	194.694	184.96	181.383	276.658	120.097	204.7	209.802	-0.246774	0.418627	0.645297	209.424	178.2
AFTPH	5962.63	7797.44	7595.73	7373.11	4764.86	5750.75	4937.34	-0.468016	0.00021093	0.00400742	7182.23	5150.98
AGA	411.252	282.507	460.912	453.042	377.306	374.056	463.895	0.0091772	0.963334	0.984077	401.928	405.086
AGAP1	193.653	22.8032	21.12	57.9894	252.205	80.9965	166.676	1.45991	0.00387606	0.0322645	73.8914	166.626
AGAP11	4.16458	2.53369	3.72705	3.62434	5.00406	0	4.66226	-0.361242	0.716785	NA	3.51242	3.22211
AGAP2	1578.37	1663.37	2038.7	1679.28	2057.67	2437.26	1719.21	0.25308	0.313088	0.548376	1739.93	2071.38
AGAP3	305.055	463.666	228.593	167.928	330.268	384.365	224.954	0.128421	0.665513	0.82324	291.31	313.196
AGAP4	36.4401	160.89	21.12	109.938	57.0463	150.212	165.51	0.637176	0.196768	0.419528	82.097	124.256
AGAP5	153.048	169.758	172.687	222.293	212.172	179.665	234.279	0.203637	0.299189	0.535104	179.446	208.705
AGAP6	647.592	449.731	506.879	414.383	730.593	447.69	624.743	0.222865	0.178171	0.393789	504.646	601.008
AGAP7P	1523.19	358.518	286.983	381.764	1582.28	615.573	949.936	0.854148	0.135721	0.332449	637.615	1049.26
AGAP9	47.8926	34.2049	43.4823	27.7866	63.0511	57.4339	29.1391	0.379159	0.378259	0.610658	38.3416	49.8747
AGBL2	108.279	57.0081	111.812	73.6949	109.088	47.1252	67.6028	-0.29615	0.310837	0.546471	87.6984	74.6055
AGBL3	52.0572	12.6685	27.3317	48.3245	80.0649	33.8713	45.4571	0.594464	0.0759108	0.233304	35.0955	53.1311
AGBL4	0	1.26685	0	0	0	0	0	-0.704825	0.749058	NA	0.316712	0
AGBL5	530.984	554.879	523.03	527.945	595.483	497.76	494.2	-0.0176442	0.901966	0.955828	534.209	529.148
AGER	2460.22	3970.3	3155.57	2029.63	2036.65	3220.71	1655.1	-0.34309	0.0625373	0.207477	2903.93	2304.16
AGFG1	13092.4	14610.5	23961.2	19793.7	8871.19	14918.1	10828.1	-0.627371	0.00321355	0.0283148	17864.5	11539.1
AGFG2	127.02	108.949	83.2375	90.6084	231.188	144.321	206.305	0.900417	9.72287e-07	7.63641e-05	102.454	193.938
AGGF1	1301.43	1565.82	1672.2	1513.77	1048.85	1163.4	1241.33	-0.388982	0.0020741	0.0210552	1513.31	1151.19
AGK	1044.27	501.671	489.486	759.903	1193.97	818.801	1115.45	0.599526	3.19299e-06	0.000188454	698.832	1042.74
AGL	1188.99	914.664	1234.9	1007.57	1385.12	1027.92	1240.16	0.153452	0.334724	0.567789	1086.53	1217.73
AGMAT	185.324	51.9407	49.694	78.5273	133.108	75.1058	90.9141	0.243931	0.435179	0.65973	91.3714	99.7093
AGMO	7.28801	5.06739	8.69646	12.0811	15.0122	2.94533	15.1524	0.30614	0.733095	0.860266	8.28325	11.0366
AGO1	3026.61	4938.17	4775.6	4865.07	4119.34	6108.61	5391.91	0.261067	0.0617471	0.205886	4401.36	5206.62
AGO2	1176.49	1567.09	2124.42	1134.42	1930.57	1711.23	1169.06	0.139039	0.557027	0.750213	1500.61	1603.62
AGO3	766.282	907.062	1070.91	971.323	1157.94	904.215	1160.9	0.226366	0.106746	0.286929	928.893	1074.35
AGO4	26735.5	34714.1	32327.2	30976	28765.3	39913.6	26521.3	0.018977	0.935618	0.972344	31188.2	31733.4
AGPAT1	2267.61	1885.07	2221.32	2162.52	1557.26	2033.75	2021.09	-0.194981	0.308667	0.544404	2134.13	1870.7
AGPAT2	183.241	219.165	238.531	141.349	112.091	228.263	67.6028	-0.610456	0.0942935	0.266821	195.572	135.986
AGPAT3	1186.9	1748.25	1397.64	965.282	1137.92	1322.45	1099.13	-0.142107	0.472026	0.687272	1324.52	1186.5
AGPAT4	1781.4	832.319	556.573	918.166	1670.35	851.199	1211.02	0.31729	0.308568	0.544347	1022.11	1244.19
AGPAT4-IT1	72.8801	31.6712	50.9364	43.4921	118.096	27.9806	50.1193	0.34859	0.417182	0.644389	49.7449	65.3986
AGPAT5	317.549	198.895	280.771	251.287	313.254	170.829	367.153	0.0345672	0.917778	0.963165	262.126	283.745
AGPAT6	3180.7	4384.56	3423.92	4223.56	3054.48	5874.45	3796.25	0.123404	0.564747	0.756329	3803.18	4241.73
AGPAT9	2576.83	5318.22	3479.82	3312.64	2483.01	5116.03	2127.16	-0.218126	0.407229	0.636453	3671.88	3242.07
AGPS	2095.82	1826.79	1854.83	1872.57	1515.23	1786.34	1793.81	-0.172924	0.320769	0.555776	1912.51	1698.46
AGRN	30.1932	143.154	136.659	44.7002	37.03	5.89065	10.4901	-2.18663	0.00513598	0.0389598	88.6764	17.8036
AGRP	1.04114	5.06739	6.21175	2.41623	6.00487	0	4.66226	-0.445794	0.703959	NA	3.68413	3.55571
AGTPBP1	14443.8	18969.8	20073.9	14829.6	14175.5	24447.7	14971.7	0.0426598	0.811168	0.908028	17079.3	17865
AGTRAP	3058.88	6393.78	5627.85	3363.39	1957.59	3476.96	1220.35	-1.04818	0.000129086	0.00281774	4610.97	2218.3
AHCTF1	10548.9	13584.4	11681.8	12073.9	12633.2	13550	13113.8	0.142728	0.49889	0.707531	11972.2	13099
AHCTF1P1	40.6046	22.8032	17.3929	16.9136	48.039	19.1446	20.9802	0.207033	0.673351	0.827128	24.4286	29.3879
AHCY	736.089	591.618	650.992	866.217	526.427	618.518	514.015	-0.362274	0.0260116	0.115431	711.229	552.987
AHCYL1	2693.44	2871.94	2902.13	2382.4	2724.21	3167.7	3218.13	0.166945	0.294174	0.53012	2712.48	3036.68
AHCYL2	823.545	637.224	638.568	618.554	1062.86	802.601	1045.51	0.507913	3.22638e-05	0.00102045	679.473	970.325
AHDC1	92.6619	36.7386	54.6634	48.3245	107.087	47.1252	46.6226	0.193197	0.50845	0.713413	58.0971	66.9449
AHI1	149.925	91.213	81.9952	286.323	242.196	126.649	343.842	0.615761	0.147563	0.350299	152.364	237.562
AHNAK	83966.2	91016.6	57144.4	62848.4	101241	133637	115998	0.666495	7.8023e-05	0.0018974	73743.9	116959
AHNAK2	16.6583	2.53369	139.143	3.62434	16.013	22.0899	10.4901	-1.12208	0.222146	0.450724	40.4899	16.1977
AHR	6175.03	18559.3	7127.37	9892.03	7595.16	15253.8	11569.4	0.196062	0.703708	0.844275	10438.4	11472.8
AHRR	20.8229	79.8114	53.4211	64.03	19.0154	26.5079	38.4637	-0.82361	0.115884	0.302663	54.5213	27.9957
AHSA1	1488.84	1459.41	1303.23	1327.72	979.795	1132.48	1053.67	-0.404298	4.10001e-06	0.000225505	1394.8	1055.31
AHSA2	3850.15	4176.79	4135.79	3572.39	4891.97	4973.18	5215.91	0.348246	0.0895518	0.258483	3933.78	5027.02
AHSP	24.9875	268.572	26.0894	7.24868	21.017	48.5979	18.6491	-1.27572	0.138723	0.337092	81.7243	29.4213
AICDA	29.152	5.06739	19.8776	41.0758	13.0106	7.36332	13.9868	-1.04524	0.0827387	0.245998	23.7932	11.4536
AIDA	1360.78	1301.05	1739.29	1297.51	1228	1083.88	1435.98	-0.204009	0.253497	0.486856	1424.66	1249.28
AIF1	13332.9	24033.4	13888.2	13776.1	14119.5	34578.1	23668	0.53449	0.00637751	0.0454962	16257.6	24121.9
AIF1L	18.7406	8.86793	3.72705	2.41623	8.00649	4.41799	9.32453	-0.142431	0.832038	0.920344	8.43795	7.24967
AIFM1	650.715	762.642	719.321	823.933	554.45	659.753	709.83	-0.203498	0.221958	0.450435	739.153	641.344
AIFM2	91.6207	53.2076	99.3881	114.771	108.088	63.3245	95.5764	-0.0453588	0.869995	0.940624	89.7468	88.9962
AIFM3	62.4687	108.949	75.7834	94.2328	73.0593	83.9418	58.2783	-0.223601	0.490971	0.701906	85.3584	71.7598
AIG1	550.765	665.095	504.394	862.592	603.489	843.836	1068.82	0.379752	0.146313	0.348937	645.712	838.716
AIM1	6069.87	7950.73	9995.96	8430.21	7320.94	7986.25	7043.51	-0.106487	0.449584	0.670797	8111.69	7450.23
AIM1L	82.2504	51.9407	105.6	78.5273	94.0763	75.1058	71.0995	0.00235066	0.995257	0.998662	79.5796	80.0939
AIM2	1648.13	3259.6	5815.44	3270.36	694.563	1893.84	1129.43	-1.47031	6.15517e-05	0.0016058	3498.38	1239.28
AIMP1	1133.81	1097.09	862.192	1012.4	1295.05	1108.92	1320.59	0.269962	0.0325265	0.134204	1026.37	1241.52
AIMP2	54.1395	84.8788	49.694	74.903	36.0292	44.1799	41.9604	-0.688419	0.0099113	0.0612783	65.9038	40.7232
AIP	688.196	728.437	593.844	561.772	742.602	805.547	557.14	0.128369	0.601158	0.781315	643.062	701.763
AIRE	2.08229	3.80054	1.24235	4.83245	4.00325	0	6.9934	0.00990406	0.992485	NA	2.98941	3.66555
AIRN	23.9463	26.6038	39.7552	31.4109	66.0536	35.3439	46.6226	0.779949	0.0792339	0.239438	30.4291	49.34
AJAP1	1.04114	0	0	0	8.00649	4.41799	2.33113	3.79685	0.0041897	NA	0.260286	4.91854
AJUBA	41.6458	55.7413	79.5105	32.619	23.0187	32.3986	15.1524	-1.15544	0.00843151	0.0548117	52.3791	23.5232
AK1	329.002	88.6793	78.2681	79.7354	368.299	223.845	213.299	1.04823	0.0101804	0.0624017	143.921	268.481
AK2	3152.59	3898.09	3107.12	2880.14	2828.29	3725.84	3881.33	0.0955609	0.455854	0.676165	3259.48	3478.49
AK3	1313.92	567.547	755.349	1000.32	1045.85	798.183	1193.54	0.179549	0.292367	0.528427	909.285	1012.52
AK4	80.1681	127.952	180.141	79.7354	36.0292	76.5785	69.934	-0.923892	0.0182025	0.0917229	116.999	60.8472
AK5	120.773	40.5391	33.5435	31.4109	207.168	73.6332	93.2453	1.17918	0.0184468	0.0925388	56.5666	124.682
AK6	107.238	98.8141	73.2987	120.811	81.0657	64.7972	106.066	-0.255448	0.256988	0.490405	100.04	83.9765
AK7	0	0	1.24235	1.20811	1.00081	2.94533	1.16557	1.43922	0.355098	NA	0.612616	1.7039
AK8	4.16458	1.26685	19.8776	0	3.00244	1.47266	12.8212	-0.285003	0.79381	NA	6.32726	5.76544
AK9	553.889	575.149	588.874	624.594	547.444	524.268	564.134	-0.103016	0.463633	0.68152	585.626	545.282
AKAP1	458.104	241.968	282.014	433.712	577.468	296.005	502.359	0.349651	0.0649398	0.211972	353.949	458.611
AKAP10	3520.11	5646.34	4466.25	5623.76	3678.98	6247.04	5335.96	0.0814638	0.595362	0.778151	4814.12	5087.33
AKAP11	2395.67	1316.25	1869.74	1417.12	3276.66	1930.66	3180.83	0.640613	0.000948419	0.0119291	1749.7	2796.05
AKAP12	15.6172	8.86793	28.5741	10.873	73.0593	83.9418	230.782	2.98369	2.00495e-05	0.000728126	15.983	129.261
AKAP13	32908.5	31781.4	46642.8	44467	31916.9	28771.4	30882.8	-0.33434	0.0581348	0.198602	38949.9	30523.7
AKAP14	9.3703	7.60108	4.9694	2.41623	9.00731	5.89065	2.33113	-0.117074	0.891292	NA	6.08925	5.74303
AKAP3	9.3703	8.86793	18.6353	18.1217	11.0089	2.94533	30.3047	-0.125304	0.856661	0.93349	13.7488	14.753
AKAP5	255.08	46.8733	36.0282	199.339	222.18	129.594	388.133	1.0831	0.0171166	0.0883645	134.33	246.636
AKAP6	15.6172	6.33424	14.9082	2.41623	19.0154	13.254	36.1325	1.15962	0.0897077	0.258796	9.81896	22.8006
AKAP7	285.274	201.429	171.444	189.674	309.251	114.868	303.047	0.146564	0.654923	0.814931	211.955	242.389
AKAP8	1957.35	2534.96	1895.83	2202.39	2550.07	2680.25	2348.62	0.233487	0.0905836	0.2604	2147.63	2526.31
AKAP8L	2932.9	3162.05	2808.96	2407.77	3025.45	3471.07	2702.95	0.115314	0.383349	0.615239	2827.92	3066.49
AKAP9	4117.73	4654.4	5199.24	5225.09	5805.71	4023.32	5643.67	0.0963652	0.53197	0.73129	4799.11	5157.56
AKIP1	96.8264	83.6119	57.1481	70.0705	64.0519	78.0511	80.424	-0.0539025	0.824606	0.916401	76.9143	74.1757
AKIRIN1	7072.49	8821.06	8995.86	8351.68	9183.45	10433.8	9549.48	0.242332	0.0379157	0.148861	8310.27	9722.25
AKIRIN2	6437.4	8134.43	8123.73	6215.74	3843.12	6304.47	3912.8	-0.649141	0.000365292	0.00603853	7227.82	4686.8
AKNA	15615.1	16026.9	20336	16003.9	17394.1	16720.6	11853.8	-0.143627	0.474964	0.689167	16995.5	15322.8
AKNAD1	1.04114	0	4.9694	6.04056	4.00325	4.41799	5.82783	0.663093	0.591258	NA	3.01278	4.74969
AKR1A1	1140.05	1460.67	1279.62	1537.93	822.667	1295.94	1392.85	-0.217483	0.384393	0.616013	1354.57	1170.49
AKR1B1	697.567	510.539	484.517	704.33	800.649	555.194	623.578	0.134067	0.292473	0.528448	599.238	659.807
AKR1C1	14.576	53.2076	32.3011	20.5379	16.013	75.1058	38.4637	0.494863	0.251023	0.484269	30.1557	43.1942
AKR1C2	15.6172	1.26685	3.72705	4.83245	6.00487	4.41799	3.4967	-0.353602	0.664415	0.822191	6.36088	4.63985
AKR1C3	300.891	288.841	359.039	260.952	184.149	204.7	276.239	-0.470721	0.160686	0.369317	302.431	221.696
AKR1C4	52.0572	88.6793	28.5741	61.6137	71.0576	48.5979	24.4769	-0.281042	0.538578	0.737405	57.7311	48.0441
AKR1C6P	4.16458	1.26685	6.21175	0	10.0081	2.94533	4.66226	1.00274	0.374197	NA	2.91079	5.8719
AKR1C8P	27.0698	40.5391	11.1812	18.1217	26.0211	22.0899	17.4835	-0.192798	0.741392	0.864917	24.2279	21.8648
AKR1E2	24.9875	27.8706	6.21175	21.746	36.0292	41.2346	44.2915	0.999108	0.0387716	0.15085	20.204	40.5184
AKR7A2	185.324	167.224	142.87	135.309	193.157	175.247	184.159	0.220939	0.196747	0.419528	157.682	184.188
AKR7A2P1	6.24687	6.33424	7.45411	15.7055	14.0114	17.672	31.4703	1.25907	0.0824193	0.245538	8.93517	21.0512
AKR7A3	7.28801	1.26685	8.69646	1.20811	12.0097	1.47266	11.6557	0.741565	0.317076	0.55241	4.61486	8.37935
AKR7L	11.4526	13.9353	8.69646	20.5379	18.0146	14.7266	10.4901	0.0655136	0.893519	0.95194	13.6556	14.4104
AKT1	4113.56	3647.25	3763.08	3449.16	5210.23	4384.12	3218.13	0.192125	0.547448	0.743672	3743.26	4270.82
AKT1S1	387.306	438.329	273.317	289.947	380.308	500.705	358.994	0.240311	0.300994	0.53726	347.225	413.336
AKT2	2979.76	3099.97	3041.28	2370.32	3788.07	3630.11	2626.02	0.220137	0.293769	0.529908	2872.83	3348.07
AKT3	745.459	263.504	521.787	474.788	1143.93	528.686	1391.69	0.997494	7.1768e-06	0.000338526	501.385	1021.43
AKTIP	1490.92	1755.85	1802.65	1745.72	1598.3	1846.72	1392.85	-0.070536	0.72849	0.857462	1698.79	1612.62
ALAD	1275.4	1309.92	1330.56	1255.23	1056.86	1350.43	1325.25	-0.0582759	0.609043	0.785653	1292.78	1244.18
ALAS1	1730.38	3461.03	3671.15	2112.99	1323.07	2784.81	1695.9	-0.492928	0.108379	0.290077	2743.89	1934.59
ALAS2	120.773	4797.55	98.1457	35.0353	227.184	963.122	324.027	-0.674993	0.530261	0.73055	1262.88	504.778
ALB	4.16458	1.26685	2.4847	1.20811	3.00244	0	2.33113	-0.365865	0.728795	NA	2.28106	1.77786
ALCAM	2190.57	1070.49	2519.49	1077.64	1474.2	1350.43	1662.1	-0.194922	0.53697	0.736187	1714.54	1495.57
ALDH16A1	233.216	198.895	200.018	247.663	319.259	238.571	296.054	0.352324	0.132718	0.328295	219.948	284.628
ALDH18A1	485.173	217.898	253.44	771.984	452.367	313.677	491.869	-0.0235067	0.939176	0.973754	432.124	419.304
ALDH1A1	238.422	1657.04	695.717	555.732	493.4	440.326	583.948	-0.342552	0.464868	0.682313	786.727	505.892
ALDH1A2	32.2755	76.0108	38.5129	100.273	33.0268	30.9259	46.6226	-0.675064	0.159198	0.367337	61.7681	36.8584
ALDH1A3	5.20572	12.6685	18.6353	21.746	8.00649	11.7813	8.15896	-0.58485	0.298382	0.534477	14.5639	9.31559
ALDH1B1	46.8515	25.3369	22.3623	106.314	22.0179	42.7072	66.4373	-0.191539	0.711834	0.84869	50.2162	43.7208
ALDH1L2	34.3578	58.275	69.5717	158.263	26.0211	27.9806	37.2981	-1.41818	0.0261762	0.115899	80.1168	30.4333
ALDH2	3239	5506.98	4004.1	2479.05	1773.44	3092.59	1698.23	-0.795716	0.00101302	0.0125706	3807.28	2188.09
ALDH3A2	992.211	857.655	908.159	912.125	917.744	960.176	1225.01	0.164777	0.236395	0.46825	917.537	1034.31
ALDH3B1	1165.04	1475.88	1357.89	1227.44	621.504	1228.2	649.22	-0.688912	0.000151879	0.00315981	1306.56	832.975
ALDH4A1	107.238	108.949	141.628	112.354	66.0536	131.067	81.5896	-0.374773	0.346555	0.579036	117.542	92.9034
ALDH5A1	199.9	122.884	134.174	96.649	300.244	150.212	240.107	0.674054	0.00809784	0.0534054	138.402	230.187
ALDH6A1	240.504	120.35	122.993	167.928	211.171	176.72	244.769	0.386911	0.032615	0.134449	162.944	210.887
ALDH7A1	17.6995	8.86793	14.9082	6.04056	24.0195	7.36332	11.6557	0.00106146	0.998893	0.999718	11.879	14.3462
ALDH8A1	38.5223	41.806	43.4823	54.3651	36.0292	41.2346	41.9604	-0.169754	0.615937	0.790606	44.5439	39.7414
ALDH9A1	2491.46	2298.06	2074.73	2276.08	1663.35	2191.32	1720.38	-0.30735	0.0131887	0.0745243	2285.08	1858.35
ALDOA	12744.6	18141.2	14829.9	13231.2	13309.8	19850	10683.6	-0.0214663	0.920616	0.964446	14736.8	14614.5
ALDOB	23.9463	6.33424	6.21175	8.45679	19.0154	5.89065	5.82783	-0.109124	0.871068	0.941262	11.2373	10.2446
ALDOC	298.808	310.378	421.157	256.12	371.301	351.966	391.63	0.217696	0.299167	0.535104	321.616	371.633
ALG1	91.6207	81.0782	53.4211	181.217	71.0576	79.5238	110.729	-0.22316	0.485812	0.698134	101.834	87.1034
ALG10	217.599	159.623	250.955	283.906	392.318	159.048	284.398	0.227655	0.309326	0.54506	228.021	278.588
ALG10B	793.352	315.445	572.724	482.037	1028.83	538.995	842.704	0.555284	0.00170481	0.0184108	540.889	803.511
ALG11	197.817	235.634	263.378	328.607	242.196	294.533	318.199	0.159534	0.47038	0.685816	256.359	284.976
ALG12	237.381	230.566	233.562	218.668	334.271	294.533	198.146	0.259402	0.325686	0.559863	230.044	275.65
ALG13	2008.37	1290.92	1461	1264.89	2550.07	1930.66	2269.36	0.577546	0.000263469	0.00475257	1506.3	2250.03
ALG14	78.0858	77.2777	63.3599	173.968	53.043	67.7425	78.0929	-0.568638	0.103164	0.281349	98.1729	66.2928
ALG1L	0	0	3.72705	2.41623	5.00406	0	1.16557	0.554455	0.72985	NA	1.53582	2.05654
ALG1L2	2.08229	6.33424	2.4847	13.2892	4.00325	7.36332	10.4901	0.287082	0.719679	0.853024	6.04762	7.28555
ALG1L9P	16.6583	8.86793	4.9694	4.83245	25.0203	2.94533	20.9802	0.790832	0.150512	0.354545	8.83202	16.3153
ALG2	471.638	373.72	434.823	544.859	434.352	453.58	606.094	0.122348	0.479784	0.693035	456.26	498.009
ALG3	226.969	215.364	168.96	271.825	173.14	216.481	201.643	-0.16615	0.340292	0.572619	220.78	197.088
ALG5	372.73	437.062	270.833	687.416	258.209	360.802	403.286	-0.373159	0.193488	0.414608	442.01	340.766
ALG6	992.211	1149.03	1151.66	1257.65	746.606	852.672	912.638	-0.437386	0.00508648	0.0387626	1137.64	837.305
ALG8	364.401	305.31	289.468	407.134	248.201	270.97	355.498	-0.233768	0.200416	0.424165	341.578	291.556
ALG9	401.882	217.898	249.713	465.123	516.419	318.095	488.372	0.388615	0.0621701	0.206699	333.654	440.962
ALK	6.24687	10.1348	16.1506	8.45679	16.013	4.41799	10.4901	0.0057769	0.992366	0.997653	10.2472	10.307
ALKBH1	251.957	292.642	351.585	230.75	272.221	244.462	235.444	-0.147073	0.451957	0.673036	281.733	250.709
ALKBH2	107.238	57.0081	81.9952	100.273	105.085	85.4145	106.066	0.186316	0.33613	0.569291	86.6286	98.8554
ALKBH3	336.29	212.83	206.23	225.917	285.231	206.173	219.126	-0.04682	0.738678	0.863274	245.317	236.844
ALKBH3-AS1	7.28801	6.33424	13.6659	3.62434	23.0187	8.83598	15.1524	0.973784	0.0488727	0.177057	7.72811	15.669
ALKBH4	405.005	374.987	444.762	231.958	393.319	564.03	145.696	-0.0400633	0.912913	0.960791	364.178	367.682
ALKBH5	2289.48	2294.26	1829.98	1861.7	2866.32	2612.5	2409.22	0.341146	0.00703958	0.0486751	2068.86	2629.35
ALKBH6	697.567	734.771	812.498	591.975	699.567	708.351	572.293	-0.101406	0.391314	0.622044	709.203	660.07
ALKBH7	42.6869	49.407	26.0894	36.2434	51.0414	79.5238	34.967	0.493759	0.245929	0.479034	38.6067	55.1774
ALKBH8	318.59	244.501	193.807	305.652	345.28	303.369	419.604	0.420989	0.017021	0.088091	265.638	356.084
ALMS1	634.057	552.345	408.733	664.462	1096.89	812.91	1028.03	0.777167	5.67811e-06	0.000290362	564.899	979.276
ALMS1-IT1	68.7155	84.8788	36.0282	76.1111	101.082	119.286	142.199	0.85613	0.0093224	0.0588621	66.4334	120.856
ALMS1P	6.24687	8.86793	99.3881	7.24868	8.00649	8.83598	17.4835	-1.21029	0.193163	0.414217	30.4379	11.442
ALOX12	852.697	1432.8	742.926	1656.32	722.586	771.675	1280.96	-0.317289	0.305378	0.541746	1171.19	925.073
ALOX12-AS1	138.472	188.76	168.96	198.13	200.162	176.72	244.769	0.268649	0.16489	0.374585	173.581	207.217
ALOX12B	7.28801	5.06739	6.21175	3.62434	9.00731	4.41799	2.33113	-0.141513	0.836628	0.92312	5.54787	5.25214
ALOX12P2	21.864	25.3369	36.0282	21.746	63.0511	8.83598	24.4769	0.169793	0.704476	0.844887	26.2438	32.1213
ALOX15	66.6332	7.60108	4.9694	3.62434	413.335	328.404	586.28	4.87548	6.3861e-05	0.00164824	20.707	442.673
ALOX15B	279.027	146.954	357.797	532.778	30.0244	4.41799	13.9868	-4.47153	2.58977e-09	8.33549e-07	329.139	16.143
ALOX15P1	31.2343	13.9353	17.3929	13.2892	52.0422	20.6173	26.808	0.755483	0.08318	0.246818	18.963	33.1558
ALOX5	20463.7	36482.7	41680.9	26277.7	17260	33316.1	14967	-0.523953	0.00289066	0.0263857	31226.2	21847.7
ALOX5AP	36428.6	30230.8	47859.1	37701.6	19857.1	24347.5	19949.8	-0.837158	0.0153489	0.0824206	38055	21384.8
ALOXE3	5.20572	1.26685	0	0	6.00487	1.47266	1.16557	0.968421	0.472963	NA	1.61814	2.88103
ALPK1	11047.6	24644	30450	18029.9	10419.5	21062	12174.3	-0.474718	0.0505806	0.181205	21042.9	14551.9
ALPK2	2.08229	12.6685	11.1812	1.20811	11.0089	4.41799	10.4901	0.488329	0.546263	0.743117	6.78501	8.639
ALPK3	82.2504	288.841	286.983	291.155	115.093	220.899	130.543	-0.556327	0.115698	0.302401	237.307	155.512
ALPL	7381.71	22098.9	20321.1	9047.56	5636.57	29665.3	6820.89	-0.356661	0.43466	0.659238	14712.3	14040.9
ALS2	1033.86	905.796	1023.7	955.617	1097.89	1060.32	1190.04	0.187185	0.261387	0.495343	979.742	1116.08
ALS2CL	272.78	148.221	63.3599	71.2786	852.692	198.81	290.226	1.59431	0.00105135	0.0128121	138.91	447.242
ALS2CR11	18.7406	5.06739	6.21175	13.2892	37.03	7.36332	20.9802	0.977256	0.0620731	0.206548	10.8272	21.7912
ALS2CR12	147.843	140.62	94.4187	123.227	157.127	176.72	192.318	0.468589	0.033969	0.138855	126.527	175.388
ALX3	157.213	186.227	212.442	158.263	209.17	156.102	148.027	-0.0509735	0.802813	0.903286	178.536	171.1
ALX4	0	0	6.21175	0	0	1.47266	0	-1.48721	0.412378	NA	1.55294	0.490888
ALYREF	666.332	680.297	637.326	654.797	758.615	814.383	613.088	0.138458	0.608646	0.785324	659.688	728.695
AMACR	1.04114	0	0	0	0	1.47266	0	0.262045	0.903176	NA	0.260286	0.490888
AMBN	1.04114	1.26685	0	3.62434	0	1.47266	0	-1.73354	0.315601	NA	1.48308	0.490888
AMBRA1	593.452	689.165	865.919	785.273	741.601	650.917	701.671	-0.0620433	0.746242	0.868496	733.452	698.063
AMD1	6026.14	6439.38	6836.66	5355.56	6206.03	6406.08	6901.32	0.0769778	0.669136	0.825296	6164.44	6504.48
AMDHD1	42.6869	39.2723	116.781	48.3245	35.0284	44.1799	36.1325	-0.654429	0.15302	0.357778	61.7662	38.4469
AMDHD2	79.127	70.9434	54.6634	57.9894	147.119	82.4691	24.4769	0.34527	0.576683	0.765178	65.6808	84.6884
AMER1	237.381	209.03	175.171	210.212	327.265	197.337	341.511	0.450924	0.00598756	0.0434124	207.948	288.704
AMFR	1605.44	1306.12	1380.25	1330.13	1479.2	1725.96	1600.32	0.190085	0.233887	0.465477	1405.49	1601.83
AMH	1.04114	0	1.24235	7.24868	9.00731	0	3.4967	0.253256	0.891817	NA	2.38304	4.168
AMHR2	5.20572	8.86793	6.21175	14.4974	7.00568	5.89065	20.9802	0.450652	0.605252	0.783781	8.69569	11.2922
AMICA1	41635.4	76411.1	42459.8	42975	48216.1	85647.1	57476.4	0.32062	0.250173	0.483346	50870.3	63779.9
AMIGO1	124.937	24.0701	34.7858	39.8677	170.138	55.9612	121.219	1.13214	0.00273964	0.0254363	55.9152	115.773
AMIGO2	583.041	891.86	1459.76	695.873	452.367	256.243	385.802	-1.31797	0.000323425	0.005513	907.634	364.804
AMIGO3	62.4687	57.0081	75.7834	45.9083	101.082	89.8324	37.2981	0.332601	0.440391	0.663957	60.2921	76.0708
AMMECR1	1119.23	771.51	899.462	933.871	1392.13	942.504	1418.49	0.410139	0.00306921	0.0274108	931.018	1251.04
AMMECR1L	1494.04	1610.16	1510.7	1389.33	1460.18	1668.53	1431.31	0.0207193	0.852407	0.931203	1501.06	1520.01
AMN1	1503.41	2491.89	3200.3	2909.14	924.75	1050.01	1090.97	-1.27103	3.84442e-06	0.000215379	2526.18	1021.91
AMOT	93.703	20.2696	32.3011	45.9083	98.0795	50.0705	115.391	0.923459	0.00173985	0.0186787	48.0455	87.847
AMOTL1	69.7567	72.2103	109.327	96.649	53.043	73.6332	67.6028	-0.429941	0.253969	0.487364	86.9857	64.7597
AMPD1	1.04114	5.06739	3.72705	7.24868	5.00406	0	3.4967	-0.556931	0.624064	NA	4.27107	2.83359
AMPD2	11442.2	5823.7	5542.13	7961.46	31150.3	18190.3	19377.5	1.55616	0.00114003	0.0136995	7692.37	22906
AMPD3	2893.34	3652.32	4041.37	2265.21	2638.14	4392.95	2457.01	-0.0406906	0.872439	0.941672	3213.06	3162.7
AMPH	419.581	244.501	559.058	427.672	62.0503	111.922	62.9406	-2.4066	7.30905e-05	0.00181236	412.703	78.9711
AMT	762.118	458.599	829.89	582.31	725.588	430.018	461.564	-0.302982	0.143054	0.343776	658.229	539.057
AMY2B	3066.17	2600.84	3897.25	3263.11	2717.2	2362.15	2467.5	-0.354581	0.0590737	0.200267	3206.84	2515.62
AMZ1	7.28801	3.80054	7.45411	2.41623	8.00649	1.47266	3.4967	-0.307321	0.672115	0.826672	5.23972	4.32528
AMZ2	2372.77	2175.18	2223.81	1969.22	2084.69	2228.14	2021.09	-0.0502441	0.772206	0.886157	2185.24	2111.31
AMZ2P1	611.152	727.17	634.841	685	497.403	720.132	552.478	-0.177594	0.402569	0.632588	664.541	590.005
ANAPC1	1137.97	713.235	862.192	1203.28	1307.06	871.817	1435.98	0.274189	0.0994067	0.275719	979.169	1204.95
ANAPC10	92.6619	100.081	63.3599	84.5679	79.0641	97.1958	128.212	0.248271	0.211352	0.437497	85.1676	101.491
ANAPC11	173.871	177.359	187.595	154.638	179.145	160.52	129.378	-0.142253	0.578429	0.766213	173.366	156.348
ANAPC13	1994.83	1994.02	1631.21	1413.49	1287.04	1776.03	1463.95	-0.234999	0.266957	0.500698	1758.39	1509.01
ANAPC15	169.707	212.83	152.809	158.263	208.169	203.228	186.491	0.205245	0.264295	0.498269	173.402	199.296
ANAPC16	4112.52	3263.4	3133.21	3000.95	3616.93	3167.7	3493.2	0.0186422	0.911371	0.960201	3377.52	3425.94
ANAPC1P1	24.9875	0	4.9694	18.1217	56.0455	17.672	53.616	1.92839	0.00483892	0.0372391	12.0196	42.4445
ANAPC2	281.109	363.585	329.223	273.033	514.417	356.384	259.921	0.264147	0.437936	0.6621	311.738	376.908
ANAPC4	3355.61	3557.31	2830.08	3311.44	3269.65	3541.75	3195.98	0.0306918	0.820112	0.913239	3263.61	3335.8
ANAPC5	4680.99	3767.6	3231.35	4444.65	4779.88	4157.33	4668.09	0.169595	0.08592	0.251816	4031.15	4535.1
ANAPC7	1507.58	1454.34	1346.71	1487.19	1240.01	1241.45	1304.27	-0.201287	0.0755567	0.232564	1448.95	1261.91
ANG	71.839	59.5418	91.934	67.6543	30.0244	29.4533	22.1458	-1.42527	0.000598832	0.00850357	72.7423	27.2078
ANGEL1	504.955	247.035	262.136	345.52	521.423	397.619	475.551	0.482574	0.00408144	0.0332665	339.912	464.864
ANGEL2	2149.96	2062.43	2124.42	2104.53	2353.91	2203.1	2356.77	0.122162	0.196006	0.418555	2110.34	2304.6
ANGPT1	307.138	134.286	166.475	282.698	298.242	69.2152	148.027	-0.379111	0.52333	0.724749	222.649	171.828
ANGPT2	22.9052	10.1348	12.4235	15.7055	29.0235	16.1993	39.6292	0.882268	0.0258347	0.11477	15.2922	28.284
ANGPT4	16.6583	11.4016	26.0894	14.4974	34.0276	25.0353	18.6491	0.589026	0.168842	0.380236	17.1617	25.904
ANGPTL1	64.551	31.6712	142.87	61.6137	114.093	75.1058	85.0863	0.318098	0.372315	0.60513	75.1766	91.4282
ANGPTL2	1.04114	6.33424	12.4235	12.0811	12.0097	13.254	9.32453	0.681714	0.334144	0.56732	7.97	11.5294
ANGPTL3	4.16458	0	2.4847	0	8.00649	0	9.32453	1.77606	0.0809477	NA	1.66232	5.77701
ANGPTL4	5.20572	16.469	12.4235	1.20811	3.00244	5.89065	0	-1.55542	0.126894	NA	8.82659	2.96436
ANGPTL6	11.4526	11.4016	24.847	14.4974	10.0081	11.7813	16.3179	-0.28314	0.575401	0.764547	15.5496	12.7024
ANGPTL7	2.08229	3.80054	8.69646	2.41623	7.00568	8.83598	4.66226	0.829397	0.262241	NA	4.24888	6.83464
ANK1	291.52	314.178	116.781	339.48	124.101	179.665	332.186	-0.323829	0.450379	0.671477	265.49	211.984
ANK2	0	0	113.054	0	2.00162	1.47266	3.4967	-2.37936	0.199178	0.422636	28.2635	2.32366
ANK3	414.375	95.0135	99.3881	137.725	578.469	244.462	555.975	1.42019	2.89315e-05	0.000953634	186.625	459.635
ANKAR	150.966	106.415	115.539	111.146	178.144	139.903	166.676	0.407635	0.0222218	0.104569	121.017	161.574
ANKDD1A	881.849	1164.23	2094.6	2111.78	789.64	976.376	1705.22	-0.384487	0.254687	0.488227	1563.12	1157.08
ANKDD1B	35.3989	30.4043	22.3623	49.5326	33.0268	39.7619	40.7948	0.135296	0.777495	0.888635	34.4245	37.8612
ANKEF1	67.6744	22.8032	37.2705	48.3245	94.0763	20.6173	92.0797	0.587016	0.096493	0.270696	44.0182	68.9244
ANKFY1	4181.24	6403.91	8274.06	5443.76	4582.72	4699.27	4559.69	-0.357246	0.057654	0.1977	6075.74	4613.89
ANKH	1162.96	912.13	1006.3	890.379	1896.54	1188.44	1836.93	0.689827	1.06524e-07	1.5074e-05	992.943	1640.64
ANKHD1	665.291	728.437	616.206	669.294	668.542	829.109	803.075	0.192765	0.164351	0.373814	669.807	766.909
ANKHD1-EIF4EBP3	69.7567	84.8788	110.569	86.9841	86.0698	95.7231	83.9207	0.0192197	0.94444	0.975357	88.0472	88.5712
ANKIB1	1972.97	2052.29	2441.22	2183.06	2185.77	1979.26	2360.27	0.00839995	0.942014	0.974543	2162.38	2175.1
ANKK1	15.6172	6.33424	19.8776	4.83245	31.0252	1.47266	22.1458	0.406696	0.545155	0.742488	11.6654	18.2145
ANKLE1	66.6332	167.224	109.327	90.6084	77.0625	104.559	96.742	-0.176928	0.576899	0.765298	108.448	92.7878
ANKLE2	3701.27	3026.5	3232.6	3132.64	3479.82	3172.12	3136.54	-0.00640127	0.950177	0.978308	3273.25	3262.83
ANKMY1	147.843	135.553	178.899	125.644	245.199	197.337	265.749	0.667931	0.00220587	0.022052	146.984	236.095
ANKMY2	618.44	571.348	545.392	514.656	618.502	477.143	564.134	-0.0341538	0.772029	0.88609	562.459	553.259
ANKRA2	1508.62	1342.86	1469.7	1325.3	1555.26	1131.01	1312.43	-0.0880755	0.616883	0.791352	1411.62	1332.9
ANKRD1	1.04114	0	11.1812	1.20811	0	0	0	-4.0702	0.185391	NA	3.3576	0
ANKRD10	4764.28	6211.35	5216.63	4716.47	3934.19	6018.77	4644.78	-0.105746	0.542885	0.740524	5227.18	4865.91
ANKRD11	3124.47	2977.09	3681.09	3667.83	4595.73	3656.62	3395.29	0.209446	0.179351	0.395121	3362.62	3882.55
ANKRD12	7795.05	9868.74	10223.3	8667	10449.5	9981.71	9636.9	0.147338	0.286472	0.522377	9138.52	10022.7
ANKRD13A	21166.5	23408.8	26520.5	19149.8	20836.9	24589.1	19519.7	-0.0540211	0.703458	0.844275	22561.4	21648.6
ANKRD13B	27.0698	5.06739	7.45411	14.4974	21.017	19.1446	12.8212	0.429654	0.466249	0.682881	13.5221	17.661
ANKRD13C	631.975	561.213	611.237	564.189	758.615	561.085	854.36	0.273763	0.0671274	0.215925	592.153	724.687
ANKRD13D	3319.17	4304.75	4662.54	2870.48	3720.02	3448.98	1965.14	-0.296518	0.356818	0.588778	3789.23	3044.71
ANKRD16	45.8104	25.3369	43.4823	45.9083	57.0463	35.3439	47.7882	0.182808	0.605704	0.783781	40.1345	46.7261
ANKRD17	3573.21	4787.42	5296.14	4631.9	4719.83	4830.33	5144.81	0.11625	0.326381	0.560295	4572.17	4898.32
ANKRD18A	165.542	74.744	103.115	32.619	102.083	107.504	89.7486	0.0797854	0.891126	0.950847	94.005	99.7786
ANKRD18DP	30.1932	24.0701	23.6047	21.746	22.0179	14.7266	3.4967	-0.932721	0.236327	0.46825	24.9035	13.4137
ANKRD19P	123.896	65.876	69.5717	111.146	117.095	78.0511	113.06	0.153919	0.61393	0.789399	92.6226	102.735
ANKRD2	21.864	25.3369	39.7552	28.9947	24.0195	14.7266	11.6557	-0.691589	0.155211	0.360876	28.9877	16.8006
ANKRD20A11P	12.4937	1.26685	1.24235	3.62434	16.013	2.94533	4.66226	0.822616	0.316831	0.552158	4.65682	7.87353
ANKRD20A12P	0	0	7.45411	1.20811	1.00081	2.94533	11.6557	1.16374	0.368708	NA	2.16555	5.2006
ANKRD20A4	108.279	0	1.24235	8.45679	63.0511	0	9.32453	0.341899	0.845756	0.927704	29.4945	24.1252
ANKRD20A5P	66.6332	30.4043	32.3011	50.7407	105.085	73.6332	125.881	1.18318	0.000404327	0.00645624	45.0199	101.533
ANKRD20A8P	2.08229	0	1.24235	0	1.00081	0	0	-0.979881	0.609473	NA	0.83116	0.333604
ANKRD20A9P	1.04114	1.26685	22.3623	0	6.00487	4.41799	1.16557	-0.108211	0.921278	NA	6.16758	3.86281
ANKRD22	649.674	3563.64	4677.45	1870.16	269.218	848.254	635.233	-1.90579	2.44252e-07	2.7651e-05	2690.23	584.235
ANKRD23	84.3327	57.0081	74.5411	74.903	116.094	67.7425	99.0731	0.36497	0.0760006	0.233492	72.6962	94.3033
ANKRD24	20.8229	10.1348	39.7552	13.2892	21.017	11.7813	17.4835	-0.447414	0.475306	0.68954	21.0005	16.7606
ANKRD26	346.701	291.375	508.122	425.256	444.36	303.369	446.412	0.0131898	0.948081	0.977069	392.863	398.047
ANKRD26P1	3.12343	2.53369	3.72705	1.20811	2.00162	0	1.16557	-1.45435	0.270938	NA	2.64807	1.05573
ANKRD27	1074.46	1238.98	1119.36	1005.15	1019.83	1251.76	962.757	-0.0419255	0.808533	0.906191	1109.49	1078.12
ANKRD28	3306.67	1511.35	1688.35	2550.33	2279.85	2893.78	2319.48	0.171572	0.486957	0.699053	2264.18	2497.7
ANKRD29	3.12343	6.33424	2.4847	2.41623	8.00649	7.36332	4.66226	0.921947	0.344847	NA	3.58965	6.67736
ANKRD30B	1.04114	0	0	0	1.00081	4.41799	2.33113	2.73609	0.205227	NA	0.260286	2.58331
ANKRD30BL	0	0	0	0	0	0	0	0	1	NA	0	0
ANKRD31	17.6995	2.53369	11.1812	4.83245	39.0317	13.254	22.1458	1.44668	0.0194337	0.0957684	9.06169	24.8105
ANKRD32	927.66	994.475	1205.08	1289.06	910.739	964.594	862.519	-0.264458	0.224928	0.454145	1104.07	912.617
ANKRD33B	671.538	1131.29	1894.59	1355.5	509.413	541.94	709.83	-0.989667	0.00363454	0.0307531	1263.23	587.061
ANKRD34A	84.3327	39.2723	140.386	73.6949	71.0576	75.1058	68.7684	-0.235979	0.538623	0.737405	84.4214	71.6439
ANKRD34B	298.808	220.431	603.783	439.753	119.097	275.388	428.928	-0.616153	0.552419	0.74658	390.694	274.471
ANKRD35	8.32916	10.1348	13.6659	4.83245	6.00487	7.36332	4.66226	-0.617953	0.454633	0.675183	9.24056	6.01015
ANKRD36	760.035	352.183	489.486	569.021	1120.91	724.55	1076.98	0.849047	8.66431e-07	7.04082e-05	542.682	974.147
ANKRD36B	483.091	149.488	192.564	231.958	783.636	260.661	297.219	0.750346	0.0116659	0.0685628	264.275	447.172
ANKRD36BP1	1058.84	1688.71	1631.21	1225.03	1529.24	1823.16	1793.81	0.312809	0.183796	0.401049	1400.95	1715.4
ANKRD36BP2	155.131	44.3396	73.2987	426.464	219.178	78.0511	166.676	-0.225156	0.712449	0.849175	174.808	154.635
ANKRD36C	199.9	108.949	180.141	149.806	357.29	256.243	331.021	0.970207	5.28599e-06	0.000275459	159.699	314.851
ANKRD37	18.7406	20.2696	23.6047	7.24868	25.0203	10.3086	19.8146	0.0410478	0.93026	0.969548	17.4659	18.3812
ANKRD39	44.7692	20.2696	31.0588	26.5785	55.0446	17.672	25.6424	0.0515053	0.890667	0.950728	30.669	32.7863
ANKRD40	968.264	852.588	744.168	763.527	926.752	1092.72	1016.37	0.2841	0.01145	0.0676085	832.137	1011.95
ANKRD42	686.114	537.143	464.639	411.966	1470.19	1285.63	1663.26	1.48646	5.54518e-07	5.06005e-05	524.966	1473.03
ANKRD44	14166.9	18153.9	17161.8	16488.3	17928.5	19140.2	17410.1	0.148335	0.176603	0.391589	16492.7	18159.6
ANKRD44-IT1	381.059	452.264	362.766	276.658	313.254	335.767	243.603	-0.316217	0.21575	0.443136	368.187	297.542
ANKRD45	6.24687	21.5364	7.45411	51.9488	0	4.41799	1.16557	-3.73712	0.0025035	0.0240462	21.7966	1.86119
ANKRD46	163.46	98.8141	108.085	100.273	231.188	88.3598	203.974	0.507994	0.0310562	0.130114	117.658	174.507
ANKRD49	2118.73	1784.99	2197.72	2071.91	2322.88	2100.02	2207.58	0.111107	0.292451	0.528448	2043.34	2210.16
ANKRD50	588.247	941.267	1246.08	843.263	547.444	1223.78	903.314	-0.0405205	0.853321	0.931582	904.714	891.514
ANKRD52	2789.23	2662.91	2587.82	2520.12	3234.62	2993.92	2989.68	0.213085	0.0717147	0.225193	2640.02	3072.74
ANKRD53	6.24687	12.6685	12.4235	12.0811	17.0138	11.7813	19.8146	0.645697	0.211289	0.43742	10.855	16.2032
ANKRD54	366.483	181.159	175.171	166.72	344.279	259.189	181.828	0.274236	0.261475	0.495453	222.383	261.765
ANKRD55	429.993	302.776	711.867	553.316	373.303	440.326	216.795	-0.536056	0.122261	0.313078	499.488	343.475
ANKRD6	355.03	480.135	515.576	582.31	379.308	363.748	301.882	-0.431508	0.1091	0.291342	483.263	348.312
ANKRD61	82.2504	87.4124	105.6	137.725	135.11	120.758	162.014	0.42478	0.0873196	0.254366	103.247	139.294
ANKRD62	4.16458	6.33424	6.21175	1.20811	4.00325	5.89065	4.66226	0.114901	0.895362	NA	4.47967	4.85205
ANKRD62P1-PARP4P3	16.6583	2.53369	3.72705	12.0811	7.00568	2.94533	10.4901	-0.279033	0.711264	0.848318	8.75005	6.8137
ANKRD7	1.04114	0	4.9694	3.62434	2.00162	0	0	-1.66417	0.375274	NA	2.40872	0.667208
ANKRD9	65.5921	45.6065	31.0588	78.5273	48.039	53.0159	52.4505	-0.0994533	0.784671	0.892858	55.1962	51.1684
ANKS1A	1225.43	1328.92	1607.6	1409.87	1176.95	1556.6	1167.9	-0.100756	0.671073	0.826432	1392.95	1300.49
ANKS1B	2.08229	1.26685	1.24235	0	2.00162	1.47266	1.16557	0.429175	0.759324	NA	1.14787	1.54662
ANKS3	80.1681	48.1402	55.9058	38.6596	109.088	57.4339	58.2783	0.403006	0.132375	0.327791	55.7184	74.9335
ANKS6	265.492	74.744	125.477	101.481	365.296	119.286	390.465	1.01575	3.45685e-06	0.000199103	141.799	291.682
ANKUB1	61.4275	10.1348	7.45411	32.619	217.176	30.9259	93.2453	2.05367	0.00207294	0.0210552	27.9089	113.782
ANKZF1	3102.61	2619.84	3197.81	3103.64	4038.28	3079.34	3026.97	0.156909	0.458322	0.678012	3005.98	3381.53
ANLN	274.862	112.749	206.23	263.369	50.0406	120.758	87.4174	-1.4563	0.00704559	0.0486962	214.303	86.0721
ANO10	1005.75	1161.7	1200.11	823.933	757.614	1454.99	671.366	-0.195151	0.455478	0.675827	1047.87	961.324
ANO2	24.9875	21.5364	8.69646	30.2028	4.00325	19.1446	45.4571	0.102544	0.908713	0.958707	21.3558	22.8683
ANO5	31.2343	78.5445	113.054	28.9947	28.0227	88.3598	41.9604	-0.280032	0.509457	0.714093	62.9569	52.781
ANO6	5286.93	4304.75	3375.47	4465.18	3484.83	3901.08	5425.71	-0.0271371	0.890295	0.950517	4358.08	4270.54
ANO7	21.864	10.1348	29.8164	1.20811	6.00487	8.83598	4.66226	-1.33305	0.126877	0.319431	15.7558	6.50104
ANO8	178.036	121.617	135.416	146.182	272.221	176.72	163.179	0.489193	0.0707975	0.223274	145.313	204.04
ANO9	473.721	211.563	166.475	146.182	944.766	400.564	529.167	1.33267	0.00015921	0.00325907	249.485	624.832
ANOS1	26.0286	26.6038	103.115	32.619	10.0081	53.0159	20.9802	-0.871834	0.187959	0.40677	47.0916	28.0014
ANP32A	36682.6	36666.4	37244.4	33759.5	22520.3	40334.8	26551.6	-0.327662	0.104877	0.284321	36088.2	29802.2
ANP32A-IT1	474.762	818.383	1002.58	674.127	749.608	1316.56	884.664	0.432971	0.027856	0.120903	742.462	983.611
ANP32AP1	11.4526	10.1348	6.21175	8.45679	6.00487	7.36332	12.8212	-0.0630904	0.923217	0.965139	9.06398	8.7298
ANP32B	5381.68	4357.95	3134.45	4548.54	4182.39	5316.31	5194.93	0.17672	0.284323	0.519959	4355.66	4897.88
ANP32C	14.576	8.86793	4.9694	2.41623	4.00325	2.94533	5.82783	-0.893136	0.350046	NA	7.70739	4.2588
ANP32E	3627.35	3825.88	3488.52	3770.52	2630.13	3814.2	3540.99	-0.148964	0.401567	0.631754	3678.07	3328.44
ANPEP	15493.3	21316	18178.1	14912.9	15345.4	31410.4	11398.1	0.00334609	0.993478	0.998205	17475.1	19384.6
ANTXR1	2.08229	12.6685	6.21175	10.873	2.00162	0	9.32453	-0.961064	0.395854	NA	7.95888	3.77538
ANTXR2	5977.21	6930.92	8656.7	5826.73	6614.36	6163.1	5972.36	-0.100118	0.621514	0.794466	6847.89	6249.94
ANTXRL	37.4812	15.2022	19.8776	3.62434	9.00731	5.89065	0	-1.99378	0.0742376	0.230231	19.0463	4.96599
ANTXRLP1	39.5635	6.33424	2.4847	8.45679	122.099	26.5079	59.4439	2.40625	1.14311e-08	2.71944e-06	14.2098	69.3503
ANXA1	42068.5	44931.3	48564.7	28898.1	28547.2	41171.2	28058.7	-0.354247	0.158717	0.366743	41115.6	32592.4
ANXA10	12.4937	16.469	26.0894	25.3704	5.00406	5.89065	8.15896	-1.60687	0.0533779	0.187626	20.1056	6.35122
ANXA11	16220	16727.4	17621.5	12688.8	12606.2	17454	10852.6	-0.233038	0.253014	0.486213	15814.4	13637.6
ANXA2	10936.2	17027.7	14736.8	14046.7	5868.76	12759.2	10457.5	-0.569829	0.0112317	0.0666792	14186.8	9695.12
ANXA2P2	14.576	25.3369	4.9694	16.9136	10.0081	13.254	11.6557	-0.378962	0.47201	0.687272	15.449	11.6392
ANXA2R	418.54	496.604	591.359	380.555	378.307	323.986	417.273	-0.346891	0.183081	0.40014	471.765	373.188
ANXA3	7908.53	25931.1	26163.9	14220.7	4391.56	20935.4	6477.05	-0.959344	0.00612721	0.044152	18556.1	10601.3
ANXA4	1620.02	2091.56	2084.66	1309.59	916.744	1708.29	1200.53	-0.495464	0.00398965	0.0329387	1776.46	1275.19
ANXA5	6181.27	13523.6	7670.27	10029.8	4655.78	10891.8	8473.66	-0.227565	0.318337	0.553608	9351.22	8007.09
ANXA6	8570.7	5710.95	6061.43	7043.3	5969.84	7785.97	7452.63	0.0547389	0.758607	0.877001	6846.59	7069.48
ANXA7	3945.94	5918.71	4406.62	4314.17	4762.86	6824.32	5416.38	0.291404	0.00424581	0.0340662	4646.36	5667.86
ANXA8	6.24687	0	17.3929	0	2.00162	0	2.33113	-2.22648	0.172299	NA	5.90994	1.44425
ANXA8L1	30.1932	2.53369	18.6353	0	5.00406	2.94533	1.16557	-1.98021	0.0766457	0.23464	12.8405	3.03832
ANXA9	2722.59	2654.04	2644.97	1768.68	4063.3	3457.81	2600.38	0.47568	0.114212	0.300251	2447.57	3373.83
AOAH	7052.71	13201.8	10486.7	13342.4	8047.53	13716.4	13906.4	0.126393	0.515543	0.718696	11020.9	11890.1
AOAH-IT1	61.4275	140.62	221.138	295.988	71.0576	212.063	263.418	0.0814759	0.865026	0.938308	179.793	182.18
AOC1	2.08229	64.6092	154.052	88.1922	2.00162	19.1446	15.1524	-2.2783	0.0219135	0.103543	77.2338	12.0995
AOC2	1024.49	893.127	788.893	845.679	1434.16	1108.92	956.93	0.391508	0.247022	0.480027	888.046	1166.67
AOC3	884.973	770.243	688.262	613.721	958.778	740.75	679.525	0.101277	0.794672	0.898866	739.3	793.017
AOC4P	38.5223	43.0728	27.3317	33.8272	43.0349	60.3792	51.2849	0.509815	0.179227	0.394953	35.6885	51.5663
AOX1	6.24687	8.86793	24.847	4.83245	3.00244	0	5.82783	-1.81671	0.0483619	0.175672	11.1986	2.94342
AOX2P	0	6.33424	1.24235	7.24868	0	10.3086	12.8212	1.08519	0.567021	NA	3.70632	7.70996
AP1AR	443.528	535.876	437.308	457.875	440.357	409.4	606.094	0.0522528	0.783103	0.892189	468.647	485.284
AP1B1	1153.59	1781.19	1784.02	1513.77	1291.05	1587.53	1085.14	-0.227645	0.354533	0.586659	1558.14	1321.24
AP1G1	8838.27	9975.15	10519	10053.9	9554.75	11753.3	9718.49	0.0725781	0.439151	0.663076	9846.58	10342.2
AP1G2	3617.98	3481.3	3643.82	3663	3876.14	3722.89	3278.74	0.00635393	0.96953	0.987149	3601.52	3625.92
AP1M1	1010.95	1379.6	1211.29	909.709	1187.96	1356.32	800.744	-0.00675178	0.976226	0.990099	1127.89	1115.01
AP1M2	179.077	67.1429	126.72	50.7407	116.094	25.0353	30.3047	-1.01087	0.123316	0.314521	105.92	57.1447
AP1S1	305.055	277.44	245.985	253.704	168.136	245.935	182.994	-0.447941	0.0485901	0.176306	270.546	199.022
AP1S2	3182.78	6811.84	3423.92	4494.18	3192.59	5360.49	5979.35	0.145452	0.460179	0.679433	4478.18	4844.15
AP1S3	138.472	190.027	428.611	228.333	112.091	125.176	172.504	-0.838056	0.0383354	0.150003	246.361	136.59
AP2A1	1427.41	1363.13	1369.07	1110.26	1785.45	1708.29	1120.11	0.222047	0.334897	0.567965	1317.47	1537.95
AP2A2	842.286	761.375	787.65	695.873	986.8	835	764.611	0.160953	0.261167	0.495098	771.796	862.137
AP2B1	6829.91	5975.72	5719.78	6462.19	6258.08	6068.84	6352.33	-0.00492896	0.961758	0.98345	6246.9	6226.42
AP2M1	7050.63	7812.65	6246.54	6173.46	5852.75	8288.15	6304.55	-0.0110473	0.936391	0.972716	6820.82	6815.15
AP2S1	694.443	997.009	690.747	868.633	592.481	867.399	815.896	-0.0948725	0.594367	0.777599	812.708	758.592
AP3B1	2485.21	3806.88	4289.84	3945.7	2852.31	3378.29	3389.47	-0.147594	0.229836	0.460249	3631.91	3206.69
AP3B2	12.4937	556.146	124.235	18.1217	9.00731	600.847	4.66226	-0.705147	0.463027	0.681423	177.749	204.839
AP3D1	1561.72	1828.06	1931.86	1716.73	1665.35	1845.25	1388.19	-0.101881	0.409017	0.637865	1759.59	1632.93
AP3M1	1908.42	2033.29	2335.62	2110.57	1737.41	2016.08	2163.29	-0.0860877	0.488252	0.700009	2096.97	1972.26
AP3M2	1222.3	557.413	484.517	593.183	1841.49	1139.84	1775.16	1.17615	1.98072e-05	0.000720919	714.354	1585.5
AP3S1	2992.25	4243.94	3489.76	3318.69	2006.63	3422.47	2582.89	-0.404612	0.00241965	0.0234585	3511.16	2670.66
AP3S2	3.12343	5.06739	6.21175	2.41623	9.00731	8.83598	9.32453	1.12644	0.0838775	0.24829	4.2047	9.05594
AP4B1	1326.42	1010.94	832.375	974.947	1239	1313.62	1201.7	0.283611	0.0817119	0.244095	1036.17	1251.44
AP4B1-AS1	129.102	100.081	94.4187	141.349	160.13	161.993	142.199	0.412182	0.124053	0.315514	116.238	154.774
AP4E1	1201.48	927.332	1483.37	1553.63	942.765	762.839	1221.51	-0.421399	0.0514432	0.183136	1291.45	975.706
AP4M1	99.9499	135.553	106.842	91.8166	103.084	159.048	122.384	0.235712	0.35594	0.588276	108.54	128.172
AP4S1	272.78	249.569	241.016	286.323	446.362	310.732	448.743	0.600544	9.68457e-06	0.000418348	262.422	401.946
AP5B1	13888.9	28250.7	42044.9	27222.4	13107.6	20405.2	15890.2	-0.655462	0.00115832	0.0138787	27851.7	16467.7
AP5M1	1488.84	2002.89	1997.7	2125.07	1437.17	1456.46	1385.86	-0.399794	0.000198423	0.0038229	1903.62	1426.5
AP5S1	88.4973	102.615	119.266	123.227	129.105	91.3051	94.4108	-0.0322699	0.897544	0.953766	108.401	104.94
AP5Z1	543.477	601.752	559.058	504.991	639.519	608.21	310.041	-0.0908894	0.772983	0.886255	552.32	519.256
APAF1	12088.7	12240.3	19085	13956.1	13080.6	13329.1	10901.5	-0.177991	0.490141	0.701466	14342.5	12437.1
APBA1	11.4526	12.6685	16.1506	3.62434	27.0219	17.672	29.1391	1.10299	0.0410191	0.15695	10.974	24.611
APBA2	596.576	54.4744	47.2093	158.263	534.433	142.848	258.756	0.926289	0.0741723	0.230072	214.131	312.012
APBA3	86.415	141.887	110.569	74.903	131.106	132.54	58.2783	0.0709499	0.887727	0.949071	103.444	107.308
APBB1	546.601	154.555	146.597	141.349	1053.85	265.079	405.617	1.21776	3.5587e-05	0.00108782	247.276	574.85
APBB1IP	11718.1	26820.4	27293.2	20577.8	10466.5	20123.9	13682.6	-0.496652	0.00195137	0.0202604	21602.4	14757.7
APBB2	88.4973	390.189	314.315	211.42	49.0398	231.208	83.9207	-1.08303	0.0113513	0.0671706	251.105	121.39
APBB3	1931.32	2654.04	2056.09	2280.92	1711.39	2619.87	1578.18	-0.195153	0.336703	0.569933	2230.59	1969.81
APC	3802.26	5064.85	6293.75	6347.42	4185.39	4965.82	5386.08	-0.118352	0.452432	0.673621	5377.07	4845.76
APC2	58.3041	43.0728	77.0258	38.6596	74.0601	53.0159	22.1458	-0.130229	0.783105	0.892189	54.2656	49.7406
APCDD1	24.9875	11.4016	27.3317	30.2028	12.0097	16.1993	60.6094	0.256442	0.67007	0.825828	23.4809	29.6062
APCDD1L	5.20572	1.26685	7.45411	2.41623	3.00244	5.89065	5.82783	0.264347	0.791425	NA	4.08572	4.90697
APCDD1L-AS1	10.4114	8.86793	2.4847	4.83245	2.00162	4.41799	1.16557	-1.50387	0.114552	NA	6.64913	2.52839
APEH	1430.53	1393.53	1387.71	1385.71	1346.09	1508.01	1188.88	-0.0538633	0.737325	0.862327	1399.37	1347.66
APEX1	1716.85	1505.01	1320.62	1493.23	1776.44	1848.19	1987.29	0.310996	0.00820608	0.0538595	1508.93	1870.64
APEX2	367.524	283.774	316.799	326.19	227.184	284.224	248.266	-0.358556	0.051219	0.182655	323.572	253.225
APH1A	4082.33	5602	5255.14	5061.99	4078.31	5297.17	4490.93	-0.10356	0.208235	0.433174	5000.37	4622.13
APH1B	1585.66	1807.79	1843.65	1736.06	1291.05	1743.63	1188.88	-0.314961	0.334598	0.567789	1743.29	1407.85
API5	2107.28	2147.31	1744.26	2260.38	1987.61	2098.54	2373.09	0.0591099	0.621622	0.794466	2064.81	2153.08
APIP	497.667	501.671	454.7	343.104	368.299	388.783	325.193	-0.317873	0.0993596	0.275719	449.286	360.758
APITD1	9.3703	1.26685	2.4847	4.83245	2.00162	4.41799	10.4901	0.472324	0.605682	NA	4.48857	5.63657
APLF	121.814	76.0108	168.96	122.019	89.0722	63.3245	162.014	-0.25464	0.420298	0.646961	122.201	104.803
APLN	0	0	6.21175	3.62434	1.00081	4.41799	1.16557	-0.201042	0.87393	NA	2.45902	2.19479
APLP1	12.4937	11.4016	31.0588	7.24868	11.0089	13.254	9.32453	-0.494377	0.480509	0.693778	15.5507	11.1958
APLP2	25451.8	40525.2	38695.5	32860.7	25128.4	44188.7	28416.5	-0.0805938	0.525198	0.726356	34383.3	32577.9
APMAP	10957	10395.7	11032.1	10198.9	8815.15	21004.6	10072.8	0.197007	0.566352	0.757304	10645.9	13297.5
APOA1-AS	16.6583	34.2049	33.5435	25.3704	31.0252	29.4533	29.1391	0.168371	0.604289	0.782941	27.4443	29.8725
APOA1BP	327.96	249.569	196.291	297.196	250.203	266.552	202.808	-0.148747	0.417952	0.64476	267.754	239.854
APOA2	84.3327	523.208	324.254	381.764	84.0682	503.651	365.988	0.0182421	0.974931	0.989458	328.389	317.902
APOBEC2	86.415	82.3451	69.5717	49.5326	103.084	80.9965	87.4174	0.315584	0.238464	0.470818	71.9661	90.4992
APOBEC3A	3099.49	7968.47	6522.34	5350.73	2601.11	3382.71	2001.28	-1.02294	7.91457e-05	0.00191337	5735.26	2661.7
APOBEC3B	211.352	96.2804	325.496	526.737	151.123	36.8166	146.861	-1.40145	0.0866689	0.253054	289.966	111.6
APOBEC3B-AS1	5.20572	6.33424	6.21175	8.45679	3.00244	1.47266	4.66226	-1.07533	0.199057	NA	6.55213	3.04579
APOBEC3C	954.729	1007.14	1033.64	1308.39	674.547	899.797	910.307	-0.383549	0.118454	0.306613	1075.97	828.217
APOBEC3D	492.461	354.717	608.752	480.829	528.429	251.825	482.544	-0.292397	0.247074	0.480027	484.19	420.933
APOBEC3F	691.32	775.31	1012.52	791.314	535.434	329.877	627.074	-0.783808	0.0172732	0.0888559	817.615	497.462
APOBEC3G	1921.95	2096.63	1995.22	2120.24	1521.23	1546.3	1409.17	-0.445393	0.00412236	0.0334827	2033.51	1492.23
APOBEC3H	352.948	92.4798	124.235	102.69	193.157	204.7	173.669	0.348453	0.289941	0.526422	168.088	190.509
APOBEC4	3.12343	2.53369	3.72705	2.41623	5.00406	4.41799	5.82783	0.790286	0.401597	NA	2.9501	5.08329
APOBR	23367.4	49042.2	53811.2	34352.7	24840.1	30931.8	16530.1	-0.651095	0.00859364	0.0556249	40143.4	24100.7
APOC1	0	0	36.0282	0	0	0	1.16557	-2.26577	0.662124	NA	9.00704	0.388522
APOD	0	0	2.4847	0	0	0	0	-1.57735	0.522279	NA	0.621175	0
APOE	10.4114	10.1348	77.0258	4.83245	16.013	14.7266	5.82783	-0.91526	0.25279	0.486187	25.6011	12.1891
APOF	3.12343	11.4016	7.45411	4.83245	6.00487	5.89065	9.32453	0.183289	0.827437	0.917419	6.7029	7.07335
APOL1	3949.06	10356.5	16640	5830.35	3501.84	3453.39	3796.25	-1.12853	0.00676141	0.0473501	9193.98	3583.83
APOL2	9095.44	21679.6	20401.9	13132.2	6420.21	7351.53	7061	-1.09207	7.84714e-05	0.00190267	16077.3	6944.25
APOL3	1890.72	4134.99	2170.39	1958.35	2099.7	1612.57	2432.54	-0.279549	0.346734	0.579242	2538.61	2048.27
APOL4	64.551	238.167	96.9034	15.7055	31.0252	22.0899	30.3047	-1.63411	0.00926785	0.0587477	103.832	27.8066
APOL5	0	1.26685	9.93881	8.45679	2.00162	0	2.33113	-1.61957	0.412315	NA	4.91561	1.44425
APOL6	16667.7	62796.3	88111.3	49593	17961.6	13638.3	24560.8	-1.33285	0.00385558	0.0321429	54292.1	18720.2
APOLD1	142.637	76.0108	62.1175	164.303	113.092	106.032	179.497	0.297531	0.403975	0.633963	111.267	132.874
APOM	246.751	339.515	309.345	271.825	218.177	350.494	236.61	-0.131261	0.445205	0.666914	291.859	268.427
APOO	117.649	146.954	130.447	129.268	67.0544	79.5238	92.0797	-0.716029	0.00625922	0.0448277	131.08	79.5526
APOOL	320.672	372.453	318.042	403.51	388.315	374.056	523.339	0.267114	0.10273	0.28093	353.669	428.57
APOPT1	237.381	302.776	196.291	205.379	205.166	229.735	223.789	-0.097159	0.535739	0.735051	235.457	219.563
APP	5958.47	6681.35	5770.72	4954.47	3887.15	7288.21	5762.56	-0.075516	0.622327	0.794981	5841.25	5645.97
APPBP2	2862.11	3053.1	3213.96	3143.51	2608.12	2154.51	2438.36	-0.357766	0.00408892	0.03331	3068.17	2400.33
APPL1	1424.29	1408.73	1989	1477.52	1243.01	1419.65	1582.84	-0.16264	0.414737	0.642336	1574.89	1415.16
APPL2	4404.04	4642.99	4907.29	4814.33	4208.41	4585.87	3751.96	-0.165187	0.258867	0.492543	4692.16	4182.08
APRT	321.714	267.305	213.684	215.044	315.256	275.388	238.941	0.130271	0.693257	0.838354	254.437	276.528
APTR	378.977	357.251	448.489	337.063	216.175	287.169	172.504	-0.765861	0.0028963	0.026398	380.445	225.283
APTX	608.028	699.3	501.91	645.132	521.423	596.429	649.22	-0.0593848	0.638829	0.80497	613.592	589.024
AQP1	21.864	12.6685	14.9082	35.0353	22.0179	32.3986	39.6292	0.580132	0.252969	0.486213	21.119	31.3486
AQP10	386.265	491.537	154.052	492.91	206.167	189.974	604.929	-0.195158	0.781782	0.891301	381.191	333.69
AQP11	63.5098	51.9407	68.3293	64.03	114.093	66.2698	97.9075	0.533845	0.0520981	0.184746	61.9525	92.7566
AQP3	461.227	241.968	176.414	1611.62	545.442	241.517	712.161	-0.389416	0.525761	0.726829	622.808	499.707
AQP7	2.08229	2.53369	0	1.20811	12.0097	2.94533	1.16557	1.80083	0.11972	NA	1.45602	5.37354
AQP7P1	7.28801	3.80054	3.72705	8.45679	6.00487	7.36332	2.33113	-0.184476	0.833447	0.921219	5.8181	5.23311
AQP7P3	5.20572	0	2.4847	0	0	2.94533	2.33113	-0.421055	0.809229	NA	1.92261	1.75882
AQP8	4.16458	10.1348	2.4847	1.20811	3.00244	1.47266	2.33113	-0.897957	0.451116	NA	4.49804	2.26874
AQP9	66007.5	117072	159795	132245	72168.5	130288	90998.1	-0.237047	0.407874	0.636731	118780	97818.2
AQR	1816.8	2339.87	2075.97	2158.9	2497.03	2186.9	2257.7	0.146078	0.188612	0.407848	2097.88	2313.88
AR	3.12343	35.4717	9.93881	1.20811	3.00244	20.6173	5.82783	-0.201497	0.782372	0.89174	12.4355	9.81585
ARAF	3160.91	3798.01	3138.18	2973.17	4262.46	4967.29	3342.84	0.352449	0.0779144	0.236951	3267.57	4190.86
ARAP1	12230.3	16742.7	17935.8	12523.3	15551.6	18866.3	10598.5	0.0303685	0.8948	0.952399	14858	15005.5
ARAP2	4666.41	6520.46	8802.06	6260.44	5393.37	4180.89	5409.39	-0.369589	0.0499969	0.179584	6562.34	4994.55
ARAP3	4980.83	7229.9	9959.93	6386.08	6097.95	7216.05	5712.44	-0.115937	0.666758	0.823829	7139.19	6342.14
ARCN1	3309.8	4606.26	4817.84	4463.98	2235.81	2831.93	2676.14	-0.721677	5.74332e-06	0.000292785	4299.47	2581.29
AREG	32.2755	57.0081	96.9034	146.182	52.0422	134.012	129.378	0.405009	0.552936	0.74691	83.0921	105.144
AREL1	3628.39	4755.74	6198.09	4619.82	5138.17	7157.14	5225.23	0.300214	0.0711981	0.224021	4800.51	5840.18
ARF1	12000.2	14695.4	13539.1	12000.2	12259.9	15178.7	11449.4	-0.00860069	0.951541	0.978913	13058.7	12962.7
ARF3	9692.01	12664.7	11681.8	11083.2	10988.9	15007.9	12477.4	0.190819	0.0608191	0.20391	11280.4	12824.7
ARF4	5799.17	7247.63	5853.96	6707.44	5442.41	7790.39	6776.6	0.0529327	0.761926	0.879043	6402.05	6669.8
ARF5	2326.96	2702.18	2206.42	1873.78	2209.79	3054.3	2160.96	0.11251	0.539789	0.738345	2277.34	2475.02
ARF6	6956.93	7499.73	6172	5493.29	5782.69	7233.72	7527.22	0.0683597	0.587366	0.772666	6530.49	6847.88
ARFGAP1	822.504	965.337	915.613	855.344	1130.92	1173.71	810.068	0.229218	0.299347	0.53527	889.699	1038.23
ARFGAP2	3584.66	3476.23	3074.82	3220.83	3951.2	4357.61	3656.38	0.256401	0.0955058	0.269032	3339.13	3988.4
ARFGAP3	2950.6	4627.79	3437.59	4119.66	3294.67	5416.45	3654.05	0.111043	0.44675	0.668071	3783.91	4121.73
ARFGEF1	4590.41	5210.54	6123.55	4946.01	4267.46	5512.18	4599.32	-0.117756	0.508083	0.713277	5217.63	4792.99
ARFGEF2	2142.68	2108.03	1977.82	2401.73	2492.02	2048.47	2793.86	0.162485	0.256395	0.489779	2157.56	2444.79
ARFGEF3	15.6172	12.6685	14.9082	10.873	4.00325	7.36332	4.66226	-1.41993	0.0771131	0.235369	13.5167	5.34294
ARFIP1	2882.93	4670.87	4816.59	6287.02	2288.86	1882.06	2985.01	-0.914609	0.00425231	0.0340662	4664.35	2385.31
ARFIP2	895.384	844.987	827.406	879.506	988.802	898.324	1071.16	0.190498	0.0526976	0.185948	861.821	986.094
ARFRP1	270.698	316.712	250.955	254.912	284.231	278.333	240.107	-0.0232693	0.890926	0.950752	273.319	267.557
ARG1	9842.98	6490.06	17349.4	6012.78	3494.83	11071.5	1345.06	-1.25419	0.0479495	0.174754	9923.81	5303.79
ARG2	400.841	433.262	300.649	455.458	332.269	450.635	500.028	0.10179	0.606764	0.784444	397.552	427.644
ARGFX	1.04114	2.53369	2.4847	1.20811	3.00244	0	0	-1.00081	0.550253	NA	1.81691	1.00081
ARGFXP2	170.748	391.456	344.131	438.545	290.235	303.369	300.716	-0.117211	0.641382	0.80627	336.22	298.107
ARGLU1	10690.5	11273.7	11996.1	10604.8	10212.3	11349.8	11665	-0.00564535	0.950537	0.978433	11141.3	11075.7
ARHGAP1	3644.01	4240.14	3761.84	3605.01	3522.86	4431.24	2961.7	-0.0691694	0.70927	0.84732	3812.75	3638.6
ARHGAP10	195.735	133.019	111.812	157.055	179.145	240.044	276.239	0.648551	0.0233027	0.10775	149.405	231.809
ARHGAP11A	421.663	349.65	460.912	816.684	311.252	462.416	360.16	-0.443476	0.15078	0.354901	512.227	377.943
ARHGAP11B	49.9749	69.6766	69.5717	76.1111	73.0593	66.2698	73.4306	0.121174	0.644706	0.807934	66.3336	70.9199
ARHGAP12	1558.59	1102.16	1311.92	1334.96	1701.38	1502.12	1817.12	0.334432	0.0431987	0.162861	1326.91	1673.54
ARHGAP15	4336.37	5524.72	5212.9	4807.08	6836.54	9049.51	7052.84	0.621848	0.000638116	0.00895272	4970.27	7646.3
ARHGAP17	1451.36	2115.63	2195.23	1379.66	1318.07	1537.46	1641.12	-0.236433	0.126342	0.318669	1785.47	1498.88
ARHGAP18	1169.21	1150.3	954.126	1566.92	741.601	1060.32	1229.67	-0.27079	0.257178	0.490652	1210.14	1010.53
ARHGAP19	4196.85	2585.63	4599.18	3984.36	3196.59	3419.52	2950.05	-0.270933	0.3325	0.566219	3841.51	3188.72
ARHGAP20	9.3703	13.9353	4.9694	4.83245	6.00487	4.41799	13.9868	-0.149327	0.859709	0.935135	8.27687	8.13655
ARHGAP21	2855.86	1934.48	1033.64	2103.32	2265.84	1834.94	2515.29	0.174193	0.473258	0.688089	1981.82	2205.36
ARHGAP22	9.3703	17.7359	11.1812	6.04056	17.0138	10.3086	10.4901	0.249785	0.726813	0.856691	11.082	12.6042
ARHGAP23	5.20572	26.6038	63.3599	28.9947	10.0081	11.7813	10.4901	-1.32506	0.0480563	0.174973	31.041	10.7598
ARHGAP24	932.865	1333.99	2412.65	1626.12	523.425	1169.29	953.433	-0.805272	0.0468626	0.172222	1576.41	882.051
ARHGAP25	20885.4	23379.7	24191.1	20914.8	21733.6	20764.5	19517.4	-0.100474	0.578286	0.766204	22342.7	20671.9
ARHGAP26	23673.5	28473.7	34219.3	28029.4	24456.8	27649.2	22495.4	-0.179863	0.282015	0.517758	28599	24867.2
ARHGAP26-AS1	18.7406	13.9353	27.3317	12.0811	24.0195	23.5626	16.3179	0.254728	0.667744	0.824447	18.0222	21.3
ARHGAP26-IT1	55.1807	46.8733	85.7222	103.898	138.112	113.395	96.742	0.699631	0.0439736	0.164838	72.9185	116.083
ARHGAP27	9292.21	14706.8	15379.1	11380.4	9616.8	12788.6	7357.05	-0.331336	0.0901417	0.259403	12689.6	9920.82
ARHGAP29	178.036	169.758	222.381	450.626	63.0511	169.356	121.219	-1.12772	0.0286406	0.123183	255.2	117.875
ARHGAP30	39253.2	49326	55479.7	39151.3	37674.6	48287.2	34626.6	-0.176798	0.202861	0.427029	45802.5	40196.1
ARHGAP31	505.996	1777.39	1316.89	814.268	548.445	957.231	620.081	-0.543817	0.033135	0.136148	1103.64	708.586
ARHGAP31-AS1	16.6583	31.6712	33.5435	12.0811	18.0146	27.9806	27.9736	0.103179	0.768993	0.884274	23.4885	24.6563
ARHGAP32	230.093	191.294	118.023	178.801	234.19	253.298	297.219	0.554484	0.0212993	0.101733	179.553	261.569
ARHGAP33	181.159	125.418	156.536	88.1922	181.147	204.7	66.4373	0.101682	0.812357	0.908651	137.826	150.761
ARHGAP35	1091.12	1016.01	1074.63	1048.64	1561.27	1497.7	1600.32	0.553115	0.000478087	0.00727996	1057.6	1553.1
ARHGAP39	3.12343	0	0	1.20811	4.00325	0	5.82783	1.67793	0.272865	NA	1.08289	3.27703
ARHGAP4	3067.21	3567.44	3399.07	2605.9	3717.01	3525.56	2286.84	0.0148788	0.952353	0.979388	3159.91	3176.47
ARHGAP42	26.0286	13.9353	37.2705	201.755	13.0106	26.5079	45.4571	-1.17272	0.133933	0.329957	69.7473	28.3252
ARHGAP44	3.12343	11.4016	8.69646	9.6649	3.00244	7.36332	5.82783	-0.617836	0.454049	0.674764	8.2216	5.39786
ARHGAP5	991.169	903.262	1104.45	1058.31	1677.36	880.653	1417.33	0.33098	0.0916657	0.262233	1014.3	1325.11
ARHGAP5-AS1	6.24687	11.4016	12.4235	9.6649	10.0081	8.83598	15.1524	0.162996	0.754407	0.874424	9.93423	11.3322
ARHGAP6	325.878	230.566	64.6022	306.861	174.141	125.176	278.57	-0.262622	0.599412	0.780096	231.977	192.629
ARHGAP9	25344.6	28915.8	27070.8	23297.2	21737.6	29448.8	19381	-0.16515	0.421267	0.647934	26157.1	23522.5
ARHGDIA	1681.45	2457.68	2282.2	1852.04	2277.85	2665.52	1629.46	0.0977234	0.747124	0.868848	2068.34	2190.94
ARHGDIB	90632.7	76532.8	66468.3	58456.9	66491.9	98770	70999.3	0.0797209	0.718781	0.852378	73022.7	78753.7
ARHGEF1	7185.98	8755.18	8251.69	5568.19	9916.04	8850.71	4846.42	0.0828974	0.796702	0.899554	7440.26	7871.06
ARHGEF10	93.703	43.0728	49.694	15.7055	95.0771	85.4145	78.0929	0.825299	0.056161	0.19449	50.5438	86.1948
ARHGEF10L	156.172	323.046	81.9952	148.598	175.142	201.755	167.841	0.105777	0.771509	0.885762	177.453	181.579
ARHGEF11	5251.53	8833.72	10030.7	7995.29	4652.77	7438.42	3894.16	-0.57891	0.000540657	0.00794528	8027.82	5328.45
ARHGEF12	2671.58	1515.15	2643.72	2393.27	1743.41	1513.9	2968.7	-0.163971	0.586023	0.771293	2305.93	2075.34
ARHGEF17	81.2093	105.148	186.353	35.0353	45.0365	132.54	13.9868	-0.808178	0.131293	0.326214	101.936	63.8543
ARHGEF18	1667.91	1581.03	1832.47	1518.6	2856.32	1948.33	1634.12	0.357859	0.0572071	0.196661	1650	2146.26
ARHGEF19	152.007	74.744	114.296	224.709	169.137	64.7972	114.225	-0.372066	0.32343	0.558031	141.439	116.053
ARHGEF2	6634.17	7949.47	8562.28	6293.06	5936.81	6746.27	4933.84	-0.31448	0.0240396	0.109713	7359.74	5872.31
ARHGEF25	22.9052	7.60108	4.9694	8.45679	9.00731	11.7813	20.9802	0.428321	0.429798	0.654768	10.9831	13.9229
ARHGEF26	19.7817	19.0027	37.2705	26.5785	29.0235	14.7266	4.66226	-0.651239	0.241038	0.473622	25.6584	16.1375
ARHGEF26-AS1	0	0	1.24235	0	0	0	0	-0.669945	0.735224	NA	0.310588	0
ARHGEF28	28.1109	1.26685	4.9694	8.45679	17.0138	20.6173	16.3179	1.10016	0.124669	0.316346	10.701	17.983
ARHGEF3	3715.84	3137.98	3282.29	2772.62	3970.22	3129.41	3553.81	0.128722	0.346417	0.579022	3227.18	3551.15
ARHGEF33	2.08229	3.80054	6.21175	8.45679	7.00568	1.47266	10.4901	0.232308	0.761421	0.87871	5.13784	6.32281
ARHGEF34P	37.4812	12.6685	45.967	22.9541	76.0617	19.1446	19.8146	0.289437	0.552717	0.746798	29.7677	38.3403
ARHGEF35	46.8515	17.7359	52.1787	39.8677	37.03	19.1446	26.808	-0.521398	0.219475	0.447649	39.1585	27.6609
ARHGEF37	6.24687	17.7359	48.4517	30.2028	6.00487	4.41799	4.66226	-2.1869	0.00362825	0.0307316	25.6593	5.02837
ARHGEF39	89.5384	43.0728	86.9646	73.6949	84.0682	63.3245	66.4373	-0.0421597	0.905547	0.957151	73.3177	71.2766
ARHGEF4	23.9463	29.1375	18.6353	12.0811	57.0463	29.4533	17.4835	0.722538	0.146799	0.349892	20.95	34.661
ARHGEF40	12197	9269.52	8000.74	9204.61	9790.94	9183.53	5748.57	-0.249727	0.447918	0.669268	9667.97	8241.01
ARHGEF5	109.32	49.407	150.324	68.8624	82.0666	30.9259	85.0863	-0.557842	0.146987	0.350035	94.4785	66.0263
ARHGEF6	8692.51	9582.43	8830.63	8106.44	9606.79	9955.2	10280.3	0.182131	0.174702	0.389003	8803	9947.43
ARHGEF7	2058.34	2130.84	1878.43	2117.82	2373.93	2244.34	2360.27	0.182973	0.120024	0.309148	2046.36	2326.18
ARHGEF9	596.576	197.628	285.741	334.647	713.579	379.947	590.942	0.692729	6.48411e-05	0.00166048	353.648	561.489
ARHGEF9-IT1	5.20572	1.26685	0	4.83245	2.00162	2.94533	5.82783	0.410812	0.66102	NA	2.82625	3.59159
ARID1A	9234.95	9725.58	12962.7	9767.59	10152.2	10701.8	9263.92	-0.0418677	0.718823	0.852378	10422.7	10039.3
ARID1B	2994.33	3051.83	3145.63	2482.67	3200.6	2724.43	2502.47	-0.064129	0.63553	0.803128	2918.62	2809.16
ARID2	2383.18	2118.17	2433.77	1896.74	3002.44	2575.69	2443.03	0.272557	0.0240276	0.109713	2207.96	2673.72
ARID3A	568.465	877.925	1124.33	717.619	551.447	883.598	622.412	-0.232371	0.294359	0.530279	822.084	685.819
ARID3B	2212.43	2627.44	2720.75	2804.03	2567.08	2963	2343.95	0.0229255	0.827283	0.917371	2591.16	2624.68
ARID3C	0	0	4.9694	3.62434	2.00162	1.47266	0	-0.897931	0.686992	NA	2.14844	1.1581
ARID4A	6138.59	6825.77	9234.39	8255.03	7515.09	8077.56	7668.26	0.0470971	0.740803	0.864639	7613.45	7753.64
ARID4B	9182.89	13191.7	17240.1	12240.6	11080	11645.8	10894.5	-0.15852	0.269979	0.504289	12963.8	11206.8
ARID5A	1093.2	2263.86	2764.23	1159.79	1296.05	1940.97	907.976	-0.333726	0.298196	0.534433	1820.27	1381.67
ARID5B	2531.02	3135.45	5271.29	4668.15	2621.13	1952.75	2803.19	-0.674547	0.0197803	0.0969233	3901.48	2459.02
ARIH1	5100.57	5666.61	5412.92	5110.32	6043.9	5688.9	5288.17	0.0925146	0.356609	0.588669	5322.6	5673.66
ARIH2	4097.94	3396.42	3566.79	3294.52	4437.6	3319.38	4038.69	0.123254	0.179722	0.395621	3588.92	3931.89
ARIH2OS	55.1807	68.4097	58.3905	50.7407	60.0487	55.9612	31.4703	-0.226554	0.529369	0.729788	58.1804	49.1601
ARL1	754.83	481.402	578.936	819.1	677.55	516.905	757.618	-0.0276412	0.864704	0.938082	658.567	650.691
ARL10	79.127	21.5364	37.2705	21.746	127.103	50.0705	88.583	1.15804	2.28109e-05	0.0008018	39.92	88.5855
ARL11	1175.45	2235.99	2400.22	2334.07	1182.96	1824.63	1441.8	-0.415808	0.0915057	0.262118	2036.43	1483.13
ARL13A	36.4401	26.6038	23.6047	25.3704	90.0731	29.4533	55.9472	0.932214	0.0169447	0.0879101	28.0047	58.4912
ARL13B	232.175	220.431	260.894	273.033	203.165	182.61	269.246	-0.179973	0.266333	0.500162	246.633	218.34
ARL14	0	0	1.24235	0	0	0	1.16557	0.260116	0.937584	NA	0.310588	0.388522
ARL14EP	614.275	321.779	327.981	450.626	609.494	466.834	610.757	0.410259	0.032243	0.133454	428.665	562.362
ARL14EPL	1.04114	5.06739	0	1.20811	0	0	3.4967	-0.525662	0.808584	NA	1.82916	1.16557
ARL15	666.332	1154.1	614.964	964.074	540.438	652.39	776.267	-0.361356	0.107864	0.289201	849.867	656.365
ARL16	454.98	400.324	319.284	358.809	407.33	427.072	378.809	0.080047	0.710577	0.84786	383.349	404.404
ARL17A	1046.35	578.949	947.914	524.321	1530.24	708.351	817.062	0.349228	0.299975	0.536168	774.383	1018.55
ARL2	12.4937	8.86793	9.93881	8.45679	9.00731	5.89065	5.82783	-0.517976	0.366138	0.598181	9.93931	6.9086
ARL2BP	1228.55	1122.43	1070.91	1063.14	1045.85	1027.92	1275.13	-0.00917403	0.919573	0.963723	1121.26	1116.3
ARL3	681.95	730.971	653.477	483.245	526.427	783.457	613.088	-0.00765131	0.970644	0.987812	637.41	640.99
ARL4A	1563.8	2113.1	1875.95	2140.78	753.611	1126.59	987.234	-1.00793	2.10309e-05	0.000752117	1923.41	955.811
ARL4C	4787.18	1252.91	808.77	1894.32	5612.55	3023.38	6401.29	1.35929	0.000375134	0.00615167	2185.8	5012.41
ARL4D	16.6583	11.4016	24.847	16.9136	23.0187	11.7813	24.4769	0.126077	0.810559	0.907718	17.4551	19.759
ARL5A	1497.17	1567.09	1454.79	1798.88	1513.23	1552.19	2011.77	0.0960562	0.482391	0.695436	1579.48	1692.39
ARL5B	923.495	1550.62	1644.87	1569.34	1801.46	1831.99	3256.59	0.762953	0.0165985	0.0865513	1422.08	2296.68
ARL5C	2.08229	1.26685	4.9694	0	2.00162	2.94533	1.16557	-0.0512821	0.96191	NA	2.07963	2.03751
ARL6	33.3166	32.938	27.3317	26.5785	86.0698	27.9806	64.1061	0.930272	0.00115455	0.0138639	30.0412	59.3855
ARL6IP1	4312.42	4382.02	4518.43	3927.57	3798.08	4627.11	4249.65	-0.020605	0.87777	0.944129	4285.11	4224.95
ARL6IP4	816.257	871.591	913.128	704.33	877.712	811.437	566.465	-0.136496	0.517626	0.720385	826.326	751.871
ARL6IP5	8732.08	9222.65	9511.44	6798.05	5691.62	8631.28	7325.58	-0.257365	0.072303	0.226369	8566.05	7216.16
ARL6IP6	989.087	1340.32	1392.68	1019.65	709.575	1169.29	990.731	-0.308433	0.0828502	0.246075	1185.43	956.534
ARL8A	2213.47	4243.94	3985.46	2895.85	2305.87	3936.43	1925.51	-0.285572	0.0810981	0.242952	3334.68	2722.6
ARL8B	2611.19	4183.13	3568.03	3874.42	1987.61	3011.6	2718.1	-0.457264	0.00524361	0.0393916	3559.19	2572.44
ARL9	4.16458	1.26685	1.24235	7.24868	2.00162	2.94533	5.82783	0.113855	0.929456	NA	3.48061	3.59159
ARMC1	444.569	342.049	284.498	384.18	466.378	441.799	428.928	0.302536	0.0937795	0.265825	363.824	445.702
ARMC10	465.392	619.488	414.945	415.591	445.361	821.746	625.909	0.381639	0.017172	0.0884739	478.854	631.005
ARMC12	210.311	135.553	331.708	253.704	56.0455	122.231	45.4571	-1.63972	0.00531391	0.0397937	232.819	74.5779
ARMC2	458.104	395.256	329.223	253.704	455.369	553.721	364.822	0.330069	0.191113	0.411209	359.072	457.971
ARMC2-AS1	21.864	36.7386	18.6353	39.8677	58.0471	60.3792	36.1325	0.836415	0.0614305	0.205164	29.2764	51.5196
ARMC3	41.6458	38.0054	16.1506	31.4109	46.0373	19.1446	52.4505	0.321483	0.517633	0.720385	31.8032	39.2108
ARMC4	5.20572	1.26685	0	0	0	1.47266	1.16557	-0.551018	0.748544	NA	1.61814	0.87941
ARMC5	131.184	95.0135	85.7222	74.903	101.082	136.958	85.0863	0.150423	0.688488	0.835356	96.7057	107.709
ARMC6	118.69	124.151	142.87	147.39	148.12	139.903	75.7618	-0.127462	0.719596	0.852987	133.275	121.262
ARMC7	451.857	736.038	603.783	485.661	268.218	415.291	219.126	-0.916162	4.52127e-09	1.2796e-06	569.335	300.878
ARMC8	2540.39	3073.37	3104.63	2938.13	2511.04	2998.34	2816.01	-0.0629669	0.483178	0.696139	2914.13	2775.13
ARMC9	7.28801	2.53369	4.9694	10.873	16.013	1.47266	6.9934	0.249181	0.706448	0.84614	6.41603	8.15968
ARMCX1	15.6172	16.469	19.8776	21.746	7.00568	14.7266	31.4703	-0.0977185	0.828995	0.918174	18.4275	17.7342
ARMCX2	66.6332	31.6712	206.23	22.9541	47.0381	35.3439	40.7948	-1.03508	0.0888794	0.257221	81.8722	41.059
ARMCX3	1663.75	1812.86	2025.03	2425.89	1931.57	1624.35	2716.93	0.0771371	0.683761	0.832822	1981.88	2090.95
ARMCX4	652.798	570.081	741.684	607.681	845.686	639.136	737.803	0.195959	0.253391	0.486766	643.061	740.875
ARMCX5	270.698	214.097	155.294	270.617	329.267	334.295	364.822	0.594639	0.0017952	0.0190732	227.676	342.795
ARMCX5-GPRASP2	9.3703	8.86793	4.9694	8.45679	11.0089	7.36332	12.8212	0.397511	0.414249	0.641864	7.91611	10.3978
ARMCX6	433.116	426.927	444.762	582.31	445.361	484.506	537.326	0.0507129	0.71261	0.849222	471.779	489.064
ARMT1	1207.73	1573.42	1487.09	1582.63	612.497	861.508	735.472	-0.987685	5.69195e-11	4.49136e-08	1462.72	736.492
ARNT	2795.47	4171.73	5168.18	3687.16	3371.73	4490.15	3811.4	0.00206628	0.98999	0.996852	3955.63	3891.09
ARNT2	8.32916	1.26685	23.6047	0	4.00325	4.41799	0	-1.58247	0.327713	NA	8.30017	2.80708
ARNTL	3838.7	4430.16	4324.62	3527.69	5097.13	6569.55	5236.89	0.481286	0.000275976	0.00491105	4030.29	5634.52
ARNTL2	60.3864	130.485	125.477	231.958	40.0325	94.2504	120.053	-0.689626	0.182211	0.398801	137.077	84.7787
ARPC1A	1713.72	2379.14	2531.91	2139.57	1522.23	2512.36	1720.38	-0.195689	0.0286897	0.123301	2191.09	1918.32
ARPC1B	3716.89	4878.63	4801.69	3620.71	3176.58	5012.95	3358	-0.152591	0.468299	0.684618	4254.48	3849.17
ARPC2	37185.5	40441.6	40920.6	35976.4	31410.5	42593.8	37229.3	-0.0639716	0.615497	0.790384	38631	37077.9
ARPC3	33403	46457.8	36189.7	33070.9	29089.6	51204.5	37732.9	0.0559119	0.716244	0.851316	37280.4	39342.3
ARPC4	7364.01	8353.59	6599.37	6125.13	5496.46	8585.63	6219.46	-0.0959617	0.574506	0.763781	7110.53	6767.18
ARPC5	20219	20885.2	30243.8	17898.2	12727.3	19478.9	13941.3	-0.548467	0.0175302	0.0895606	22311.6	15382.5
ARPC5L	1433.66	1306.12	1079.6	1405.03	1174.95	1790.76	1568.85	0.205229	0.398483	0.62883	1306.1	1511.52
ARPIN	254.039	1455.61	387.613	781.649	304.247	1480.03	1082.81	0.444901	0.281585	0.517332	719.727	955.695
ARPP19	7855.43	7407.25	6962.13	9059.64	8478.88	7454.62	8130.99	0.0354118	0.761072	0.878551	7821.12	8021.49
ARPP21	1.04114	0	0	0	0	4.41799	0	2.09469	0.477966	NA	0.260286	1.47266
ARR3	62.4687	82.3451	101.873	61.6137	83.0674	67.7425	93.2453	0.075214	0.784435	0.892775	77.0751	81.3517
ARRB1	4788.22	5112.99	4061.25	5744.58	6607.36	5326.62	8582.06	0.463782	0.0345013	0.140391	4926.76	6838.68
ARRB2	41964.4	65626.5	67432.3	47378.6	38607.3	56124.7	40608.3	-0.278047	0.0266119	0.117334	55600.4	45113.4
ARRDC1	617.399	865.257	693.232	502.575	708.575	964.594	497.697	0.111217	0.727965	0.857212	669.615	723.622
ARRDC1-AS1	135.349	87.4124	111.812	100.273	143.116	100.141	132.875	0.196003	0.300641	0.536956	108.712	125.377
ARRDC2	2650.75	2144.77	2115.72	1736.06	2803.27	1966.01	2448.85	0.12645	0.508149	0.713294	2161.83	2406.04
ARRDC3	6310.38	5833.83	7886.44	7321.16	8029.51	6955.39	7648.44	0.151185	0.596887	0.778812	6837.95	7544.45
ARRDC3-AS1	144.719	152.022	152.809	190.882	115.093	95.7231	115.391	-0.563218	0.00427727	0.0341987	160.108	108.736
ARRDC4	2324.88	3018.9	1622.51	1884.66	3206.6	4769.96	3366.15	0.763633	0.0427366	0.161641	2212.73	3780.9
ARRDC5	181.159	105.148	156.536	153.43	118.096	128.122	179.497	-0.0680161	0.839077	0.924331	149.068	141.905
ARSA	1314.97	971.672	1105.69	865.009	1538.25	1446.16	1030.36	0.327661	0.21936	0.447649	1064.33	1338.25
ARSB	889.137	2181.51	2589.06	1386.91	846.687	1474.14	1289.12	-0.471868	0.0574964	0.197407	1761.66	1203.31
ARSD	1120.27	1276.98	1708.23	1095.76	655.532	1029.39	786.757	-0.670658	0.000350805	0.00586402	1300.31	823.893
ARSG	1025.53	985.607	1284.59	1009.98	1350.09	899.797	757.618	-0.0739987	0.819139	0.912928	1076.43	1002.5
ARSJ	10.4114	1.26685	1.24235	2.41623	2.00162	5.89065	4.66226	0.453114	0.676433	NA	3.83422	4.18485
ARSK	66.6332	32.938	57.1481	76.1111	114.093	32.3986	118.888	0.514598	0.0942543	0.266788	58.2076	88.4596
ART1	7.28801	6.33424	7.45411	2.41623	15.0122	4.41799	6.9934	0.621562	0.410586	0.638686	5.87314	8.80785
ART3	3.12343	1.26685	2.4847	0	6.00487	2.94533	10.4901	1.91211	0.0418099	NA	1.71875	6.4801
ARTN	1.04114	0	0	2.41623	1.00081	1.47266	1.16557	0.517153	0.737403	NA	0.864342	1.21301
ARV1	206.147	238.167	228.593	256.12	128.104	131.067	165.51	-0.717823	0.000930548	0.0117771	232.257	141.56
ARVCF	32.2755	5.06739	19.8776	10.873	55.0446	19.1446	20.9802	0.901686	0.173021	0.38673	17.0234	31.7231
ASAH1	30997	27138.4	23302.8	31609.1	27565.4	35869.7	28596	0.0965184	0.710247	0.847844	28261.8	30677
ASAH2	0	0	0	1.20811	2.00162	2.94533	0	2.14703	0.286475	NA	0.302028	1.64898
ASAH2B	5.20572	6.33424	3.72705	1.20811	11.0089	16.1993	15.1524	1.76231	0.00264622	0.0248642	4.11878	14.1202
ASAP1	10530.1	23082	30124.5	13888.5	13777.2	22835.1	11938.9	-0.175233	0.457731	0.6777	19406.3	16183.7
ASAP1-IT1	12.4937	5.06739	13.6659	3.62434	13.0106	8.83598	8.15896	0.203642	0.759376	0.877535	8.71283	10.0018
ASAP1-IT2	81.2093	92.4798	147.84	31.4109	57.0463	125.176	71.0995	-0.0847991	0.838907	0.924299	88.2349	84.4407
ASAP2	438.322	238.167	94.4187	364.85	394.32	69.2152	307.709	-0.224342	0.684739	0.833332	283.939	257.081
ASAP3	18.7406	43.0728	22.3623	37.4515	23.0187	26.5079	51.2849	0.0998998	0.873097	0.942082	30.4068	33.6038
ASB1	1489.88	1607.63	1418.76	1112.67	1569.27	1353.38	1312.43	0.00434267	0.979012	0.991735	1407.24	1411.69
ASB11	2.08229	0	1.24235	0	2.00162	0	2.33113	0.777128	0.62927	NA	0.83116	1.44425
ASB12	6.24687	0	1.24235	3.62434	2.00162	0	4.66226	-0.222789	0.830497	NA	2.77839	2.2213
ASB13	174.912	178.625	142.87	102.69	140.114	169.356	169.007	0.0901115	0.712236	0.848983	149.774	159.492
ASB14	173.871	169.758	255.924	169.136	209.17	197.337	202.808	0.0675007	0.787939	0.895398	192.172	203.105
ASB15	4.16458	6.33424	8.69646	3.62434	7.00568	10.3086	11.6557	0.836373	0.259098	0.492712	5.7049	9.65666
ASB16	340.454	304.043	314.315	403.51	348.282	287.169	283.233	-0.156783	0.404899	0.634649	340.58	306.228
ASB16-AS1	417.499	437.062	539.18	419.215	394.32	304.841	321.696	-0.422449	0.0516891	0.183772	453.239	340.286
ASB2	21.864	10.1348	12.4235	31.4109	42.0341	25.0353	46.6226	0.992268	0.0431709	0.162796	18.9583	37.8973
ASB3	44.7692	13.9353	18.6353	22.9541	25.0203	23.5626	31.4703	0.122559	0.734953	0.861213	25.0735	26.6844
ASB6	1035.94	891.86	864.676	961.658	1148.93	1045.59	831.048	0.0985316	0.565521	0.756628	938.533	1008.52
ASB7	2214.51	2870.68	3072.33	2155.27	2045.66	2593.36	2087.53	-0.186802	0.120367	0.309739	2578.2	2242.18
ASB8	2941.23	3893.02	3741.96	3887.71	2870.33	3295.82	2517.62	-0.308567	0.00575427	0.0424373	3615.98	2894.59
ASB9	17.6995	10.1348	22.3623	2.41623	13.0106	4.41799	11.6557	-0.478067	0.466168	0.682881	13.1532	9.69473
ASB9P1	56.2218	183.693	213.684	223.501	92.0747	98.6684	54.7816	-0.898908	0.0196587	0.0965388	169.275	81.8416
ASCC1	1035.94	1480.94	1311.92	1304.76	798.648	824.691	724.982	-0.701951	0.00397779	0.0328613	1283.39	782.774
ASCC2	1245.21	1610.16	1304.47	1500.48	1479.2	1444.68	1441.8	0.0459255	0.715332	0.850821	1415.08	1455.23
ASCC3	1322.25	1350.46	1070.91	1608	1736.41	1310.67	1937.17	0.285545	0.156507	0.362963	1337.9	1661.42
ASCL2	37.4812	48.1402	22.3623	26.5785	20.0162	14.7266	10.4901	-1.12965	0.0075788	0.0512803	33.6405	15.0777
ASCL3	1.04114	0	1.24235	0	1.00081	0	0	-0.40798	0.822796	NA	0.570874	0.333604
ASF1A	279.027	176.092	165.233	254.912	264.214	157.575	235.444	-0.000525677	0.99824	0.999519	218.816	219.078
ASF1B	475.803	342.049	188.837	304.444	337.274	344.603	338.014	0.0612187	0.868577	0.939676	327.783	339.964
ASGR1	48.9338	97.5472	60.8752	50.7407	47.0381	97.1958	57.1127	0.061888	0.878772	0.944626	64.5242	67.1155
ASGR2	804.805	2285.39	1252.29	585.935	446.362	2104.44	515.18	-0.428094	0.264938	0.498791	1232.11	1021.99
ASH1L	5643	7294.51	8331.21	7057.79	8807.14	8329.38	8034.25	0.260242	0.0178315	0.0906765	7081.63	8390.26
ASH1L-AS1	92.6619	89.9461	90.6916	77.3192	103.084	111.922	93.2453	0.225319	0.433592	0.658322	87.6547	102.75
ASH2L	1505.49	2163.77	2381.59	2021.17	1047.85	1331.29	1208.69	-0.7382	4.82594e-09	1.34267e-06	2018.01	1195.94
ASIC1	14.576	3.80054	6.21175	3.62434	38.0308	11.7813	4.66226	1.35078	0.0366896	0.146106	7.05316	18.1581
ASIC3	56.2218	39.2723	67.087	45.9083	94.0763	38.2892	57.1127	0.194842	0.608742	0.785326	52.1223	63.1594
ASIC4	1.04114	5.06739	3.72705	1.20811	3.00244	2.94533	0	-0.553413	0.738446	NA	2.76092	1.98259
ASIP	2.08229	0	3.72705	0	4.00325	1.47266	0	0.321081	0.821766	NA	1.45234	1.8253
ASL	803.763	604.286	793.862	791.314	607.493	645.026	411.445	-0.43548	0.112301	0.2968	748.306	554.655
ASNA1	633.016	871.591	701.928	742.989	670.544	876.235	508.187	-0.102564	0.715712	0.850962	737.381	684.988
ASNS	1277.48	610.62	884.554	735.741	1386.12	737.804	852.029	0.166806	0.598219	0.779533	877.1	991.986
ASNSD1	1838.66	2992.29	2690.93	1691.36	1446.17	2145.67	1356.72	-0.466915	0.0142288	0.0782726	2303.31	1649.52
ASPDH	33.3166	22.8032	57.1481	26.5785	45.0365	23.5626	65.2717	0.275618	0.530068	0.730384	34.9616	44.6236
ASPH	6301.01	6055.53	16171.7	14276.3	1834.49	6469.41	3040.96	-1.61189	0.000652802	0.00908114	10701.1	3781.62
ASPHD1	2.08229	5.06739	12.4235	6.04056	2.00162	4.41799	4.66226	-0.769156	0.396149	NA	6.40344	3.69396
ASPHD2	148.884	254.636	301.891	240.414	139.113	216.481	237.775	-0.227948	0.373292	0.605858	236.456	197.79
ASPM	396.676	140.62	252.197	740.573	114.093	187.028	196.981	-1.22707	0.0172302	0.0887184	382.517	166.034
ASPN	2.08229	0	4.9694	2.41623	1.00081	1.47266	1.16557	-1.10512	0.475031	NA	2.36698	1.21301
ASPRV1	1819.92	2846.61	2425.07	2425.89	1725.4	2381.3	1270.47	-0.409492	0.0642003	0.210449	2379.37	1792.39
ASPSCR1	114.526	126.685	109.327	125.644	134.109	111.922	90.9141	-0.0825485	0.807289	0.905653	119.045	112.315
ASRGL1	203.023	184.96	231.077	224.709	168.136	268.025	370.65	0.323879	0.27488	0.510021	210.942	268.937
ASS1	0	0	3.72705	0	1.00081	0	0	-1.02943	0.675455	NA	0.931763	0.333604
ASTE1	276.944	217.898	327.981	332.231	320.26	347.548	300.716	0.15817	0.410078	0.638434	288.763	322.841
ASTL	11.4526	2.53369	2.4847	2.41623	4.00325	2.94533	9.32453	0.339091	0.691287	0.83739	4.7218	5.42437
ASTN2	14.576	6.33424	6.21175	7.24868	20.0162	13.254	15.1524	0.938667	0.10906	0.291321	8.59267	16.1409
ASTN2-AS1	4.16458	0	2.4847	1.20811	5.00406	1.47266	6.9934	1.24184	0.306457	NA	1.96435	4.49004
ASUN	580.959	475.068	463.397	569.021	558.453	500.705	627.074	0.101672	0.532922	0.732166	522.111	562.078
ASXL1	3887.63	3882.89	3336.95	4074.96	5253.26	4325.21	4621.47	0.313397	0.00776863	0.0519951	3795.61	4733.31
ASXL2	1687.7	1977.55	2743.11	2247.09	3299.68	3104.37	3338.18	0.609901	6.40062e-06	0.00031363	2163.86	3247.41
ASXL3	5.20572	3.80054	0	3.62434	1.00081	7.36332	13.9868	1.04974	0.405488	NA	3.15765	7.45031
ATAD1	1196.27	1227.57	1369.07	1541.55	1500.22	1098.61	1285.62	-0.0525278	0.698468	0.841296	1333.62	1294.81
ATAD2	1051.56	608.087	836.102	1071.6	813.66	670.062	893.989	-0.169147	0.337566	0.570841	891.835	792.57
ATAD2B	1499.25	1873.67	2502.09	1627.33	1542.25	1720.07	1691.24	-0.16413	0.304714	0.541035	1875.58	1651.19
ATAD3A	38.5223	34.2049	32.3011	48.3245	44.0357	29.4533	26.808	-0.196623	0.593072	0.776626	38.3382	33.4323
ATAD3B	114.526	63.3424	72.0564	103.898	133.108	75.1058	43.1259	-0.0835648	0.822454	0.914921	88.4556	83.7799
ATAD3C	14.576	8.86793	4.9694	13.2892	9.00731	5.89065	9.32453	-0.38315	0.528448	0.729254	10.4256	8.07416
ATAD5	425.828	300.243	373.948	469.956	380.308	287.169	461.564	-0.07653	0.729114	0.857762	392.494	376.347
ATAT1	318.59	243.235	267.105	233.166	364.295	287.169	376.478	0.362457	0.0040682	0.0332654	265.524	342.648
ATE1	1261.87	1169.3	1145.45	1032.94	1034.84	1116.28	1079.31	-0.099274	0.327913	0.561751	1152.39	1076.81
ATE1-AS1	7.28801	20.2696	13.6659	14.4974	8.00649	8.83598	0	-1.25959	0.100365	0.27717	13.9302	5.61416
ATF1	840.204	891.86	859.707	921.79	730.593	792.293	951.102	-0.0924039	0.51717	0.720168	878.39	824.662
ATF2	3099.49	3910.76	3462.43	3617.09	3057.48	3216.3	3214.63	-0.148572	0.215187	0.442315	3522.44	3162.8
ATF3	187.406	1223.77	530.484	213.836	233.189	326.931	298.385	-0.660052	0.445806	0.6672	538.875	286.168
ATF4	16057.6	18953.3	13417.4	17112.9	11925.7	17398	15217.6	-0.150282	0.359421	0.591557	16385.3	14847.1
ATF5	189.488	744.906	274.56	514.656	235.191	359.33	322.862	-0.409542	0.286727	0.522784	430.902	305.794
ATF6	4441.52	8694.37	9569.83	7271.63	4851.94	10114.3	7932.84	0.0573373	0.684556	0.833266	7494.34	7633.01
ATF6B	3957.39	4083.05	4503.52	3434.66	4195.4	4856.84	3490.87	0.0664066	0.748603	0.869785	3994.66	4181.04
ATF7	2280.11	3150.65	3493.49	3010.62	2372.92	2995.4	2488.48	-0.174416	0.179943	0.395894	2983.72	2618.93
ATF7IP	13369.3	12031.2	15585.3	14162.7	13815.2	9566.42	10701.1	-0.292802	0.0180694	0.0913313	13787.1	11360.9
ATF7IP2	603.864	287.574	330.465	320.15	702.57	382.892	611.922	0.545096	0.00363377	0.0307531	385.513	565.795
ATG10	263.41	402.857	291.952	385.388	192.156	187.028	251.762	-0.651196	0.00265115	0.024882	335.902	210.315
ATG101	236.34	323.046	245.985	250.079	199.162	176.72	216.795	-0.397224	0.10069	0.277692	263.863	197.559
ATG12	2581	3595.31	3628.91	3184.58	2452.99	3004.23	2855.64	-0.210404	0.0122188	0.0710239	3247.45	2770.95
ATG13	3304.59	3936.09	3932.04	3786.22	3327.7	4042.46	3381.31	-0.0558963	0.463924	0.68164	3739.74	3583.82
ATG14	1791.81	1683.64	1448.58	1701.02	2143.74	2181.01	2301.99	0.413558	8.1475e-05	0.00196678	1656.26	2208.92
ATG16L1	1978.17	1736.85	1569.09	1773.51	2170.76	1874.7	2003.61	0.185758	0.068506	0.218439	1764.41	2016.36
ATG16L2	20909.3	20946	26204.9	18554.2	22638.4	24980.8	15795.7	-0.0343802	0.904024	0.956589	21653.6	21138.3
ATG2A	2477.92	1612.7	1579.03	2429.51	5745.66	3148.55	2258.87	0.827264	0.0376222	0.148204	2024.79	3717.69
ATG2B	4231.21	4288.28	4109.7	4757.55	5056.1	5987.85	5368.6	0.330949	0.0453609	0.168805	4346.68	5470.85
ATG3	5799.17	10732.7	10184.8	6793.22	5371.36	8104.06	7005.05	-0.251189	0.204126	0.428427	8377.48	6826.82
ATG4A	503.914	497.871	514.333	829.973	395.321	465.362	593.273	-0.276822	0.198858	0.422337	586.523	484.652
ATG4B	1146.3	1000.81	893.25	896.42	1449.18	1293	1059.5	0.367018	0.054202	0.189384	984.195	1267.22
ATG4C	283.191	220.431	325.496	345.52	244.198	206.173	336.849	-0.190226	0.438785	0.66274	293.66	262.406
ATG4D	289.438	466.2	455.943	358.809	545.442	680.37	364.822	0.441304	0.141401	0.341211	392.598	530.212
ATG5	1251.46	1670.97	1321.86	1427.99	939.762	1181.08	1162.07	-0.369169	0.000723942	0.00972464	1418.07	1094.3
ATG7	1835.54	3131.65	3180.42	2744.83	1772.44	2775.97	2318.31	-0.218482	0.133715	0.329601	2723.11	2288.91
ATG9A	2560.17	2631.24	3001.52	3022.7	3174.57	3363.56	2371.93	0.0817094	0.761424	0.87871	2803.91	2970.02
ATG9B	70.7978	16.469	9.93881	13.2892	82.0666	33.8713	36.1325	1.03978	0.040793	0.156306	27.6237	50.6901
ATHL1	10031.4	6393.78	14975.3	11257.2	11352.2	7143.89	6588.94	-0.368426	0.316633	0.552106	10664.4	8361.68
ATIC	856.862	420.593	408.733	878.298	710.576	488.924	868.347	0.118718	0.559786	0.752324	641.122	689.282
ATL1	127.02	83.6119	40.9976	97.8571	80.0649	30.9259	116.557	-0.237326	0.538165	0.737117	87.3716	75.8491
ATL2	1668.95	1198.44	1488.34	1420.74	1736.41	1516.84	1739.02	0.20385	0.172868	0.386598	1444.12	1664.09
ATL3	1814.71	1753.32	2103.3	1711.9	1612.31	1896.79	1993.12	-0.0121073	0.913861	0.961202	1845.81	1834.07
ATM	19136.2	10053.7	11346.4	13485	25456.6	13028.7	20496.5	0.520695	0.000164505	0.00334202	13505.3	19660.6
ATMIN	1883.43	1674.77	1393.92	1659.95	1861.51	2368.04	1994.28	0.33295	0.0152684	0.0821321	1653.02	2074.61
ATN1	415.417	276.173	524.272	259.744	628.51	351.966	518.677	0.370137	0.266545	0.500267	368.901	499.718
ATOH7	10.4114	8.86793	1.24235	4.83245	1.00081	5.89065	4.66226	-0.732002	0.519389	NA	6.33854	3.85124
ATOH8	12.4937	35.4717	90.6916	82.1517	13.0106	57.4339	37.2981	-0.602557	0.396051	0.626438	55.2022	35.9142
ATOX1	471.638	641.025	475.82	549.691	378.307	541.94	445.246	-0.232206	0.139661	0.338281	534.544	455.164
ATP10A	764.2	414.259	427.369	373.307	822.667	343.131	655.048	0.255425	0.339383	0.571792	494.784	606.949
ATP10B	0	1.26685	0	1.20811	10.0081	0	5.82783	2.97149	0.0124559	NA	0.61874	5.27865
ATP10D	781.899	1241.51	1185.2	1036.56	955.775	1044.12	1336.9	0.0678087	0.758431	0.876982	1061.29	1112.27
ATP11A	6478	7556.74	9949.99	7908.31	7938.44	9059.82	6691.51	0.00446484	0.979328	0.991871	7973.26	7896.59
ATP11A-AS1	22.9052	63.3424	100.63	84.5679	101.082	88.3598	62.9406	0.450817	0.30251	0.538637	67.8615	84.1274
ATP11AUN	5.20572	3.80054	17.3929	19.3298	8.00649	10.3086	2.33113	-0.736212	0.317935	0.553084	11.4322	6.88209
ATP11B	10212.6	18012	27533	17079.1	10550.6	17991.5	12395.8	-0.361479	0.0679122	0.217229	18209.2	13646
ATP11C	1208.77	1885.07	1658.54	1362.75	1580.28	1681.78	1792.64	0.16228	0.19968	0.423317	1528.78	1684.9
ATP13A1	608.028	823.451	888.281	770.776	809.657	619.991	523.339	-0.256163	0.302111	0.538278	772.634	650.996
ATP13A2	192.612	190.027	221.138	120.811	236.192	175.247	160.848	0.0672817	0.824674	0.916401	181.147	190.762
ATP13A3	2446.69	3262.13	2751.81	3248.61	2932.38	5251.52	3610.92	0.40993	0.006055	0.0437661	2927.31	3931.61
ATP13A4	77.0447	43.0728	39.7552	112.354	76.0617	61.8518	135.206	0.419293	0.393915	0.624203	68.0568	91.0397
ATP13A4-AS1	0	1.26685	0	0	1.00081	0	1.16557	0.993729	0.592378	NA	0.316712	0.722126
ATP13A5	3.12343	2.53369	0	3.62434	3.00244	2.94533	3.4967	0.440021	0.670385	NA	2.32037	3.14815
ATP13A5-AS1	0	0	3.72705	0	4.00325	4.41799	1.16557	2.11406	0.0931982	NA	0.931763	3.1956
ATP1A1	5077.66	6449.52	4412.83	5134.48	6335.14	7009.88	7465.45	0.406283	0.0260725	0.115608	5268.62	6936.82
ATP1A1-AS1	59.3452	87.4124	49.694	66.4462	69.056	79.5238	132.875	0.532661	0.128224	0.321361	65.7245	93.8181
ATP1A2	0	0	0	0	0	2.94533	1.16557	2.25701	0.358697	NA	0	1.3703
ATP1A3	65.5921	32.938	33.5435	56.7813	95.0771	85.4145	48.9538	0.734822	0.0720469	0.225826	47.2137	76.4818
ATP1A4	41.6458	36.7386	29.8164	0	43.0349	33.8713	1.16557	-0.0326343	0.983281	0.993632	27.0502	26.0239
ATP1B1	44.7692	64.6092	14.9082	94.2328	27.0219	48.5979	160.848	0.504833	0.398166	0.628633	54.6299	78.8226
ATP1B2	4.16458	43.0728	8.69646	6.04056	1.00081	13.254	0	-2.01478	0.0623776	0.207147	15.4936	4.75159
ATP1B3	1639.8	2852.94	1816.32	2365.48	1440.17	1715.65	2260.03	-0.25593	0.332138	0.565918	2168.64	1805.28
ATP2A1	117.649	179.892	147.84	124.436	104.084	111.922	97.9075	-0.434486	0.0285115	0.122869	142.454	104.638
ATP2A2	4108.36	5647.6	4472.46	5167.1	4705.82	5537.21	5722.93	0.138475	0.427243	0.652937	4848.88	5321.99
ATP2A3	5504.53	4012.1	5535.92	4138.99	5340.33	5099.83	3705.33	-0.0251224	0.919258	0.963551	4797.89	4715.17
ATP2B1	6763.27	8442.27	5483.74	7533.79	13309.8	12645.8	13160.4	0.883387	0.0002391	0.00440002	7055.77	13038.7
ATP2B2	23.9463	15.2022	17.3929	13.2892	11.0089	8.83598	11.6557	-0.740327	0.159607	0.367833	17.4577	10.5002
ATP2B4	8504.07	8297.85	14595.1	8995.61	9735.9	14943.1	10916.7	0.228343	0.221961	0.450435	10098.2	11865.2
ATP2C1	2428.99	2498.22	2714.54	2580.53	2495.02	2437.26	2704.11	-0.00638225	0.955659	0.980753	2555.57	2545.46
ATP2C2	269.656	171.024	192.564	128.06	177.144	195.864	73.4306	-0.41256	0.350295	0.58276	190.326	148.813
ATP5A1	6717.46	6483.72	5851.47	8413.3	5101.14	6716.82	6915.3	-0.13764	0.388133	0.618923	6866.49	6244.42
ATP5B	10065.8	12617.8	10417.1	11990.5	8241.68	11759.2	10185.9	-0.165236	0.245333	0.47851	11272.8	10062.3
ATP5C1	2579.96	2958.09	2379.1	3028.74	1841.49	2750.93	2465.17	-0.22269	0.0991626	0.275424	2736.47	2352.53
ATP5D	44.7692	19.0027	18.6353	19.3298	25.0203	26.5079	9.32453	-0.252745	0.679204	0.830661	25.4342	20.2843
ATP5E	4.16458	1.26685	3.72705	1.20811	0	1.47266	1.16557	-1.56888	0.303982	NA	2.59165	0.87941
ATP5F1	4375.93	4653.13	3763.08	4807.08	3279.66	5182.3	4249.65	-0.0695025	0.659286	0.818746	4399.81	4237.2
ATP5G1	680.908	713.235	515.576	924.206	464.377	568.448	757.618	-0.249548	0.306372	0.542594	708.481	596.814
ATP5G2	4607.06	6237.95	4492.34	5286.7	3846.12	5942.2	5823.17	0.0122073	0.934261	0.971426	5156.02	5203.83
ATP5G3	1359.73	1516.42	1354.16	1815.79	1051.85	1363.69	1383.53	-0.257462	0.189108	0.408291	1511.53	1266.36
ATP5H	2472.72	2939.09	2502.09	2411.39	1661.35	2702.34	2387.08	-0.21045	0.209484	0.434946	2581.32	2250.25
ATP5I	829.792	914.664	767.773	798.562	769.624	839.418	548.982	-0.199308	0.419596	0.646304	827.698	719.341
ATP5J	1685.61	2191.65	1580.27	1710.69	1098.89	1717.13	1727.37	-0.24606	0.177166	0.392609	1792.05	1514.46
ATP5J2	186.365	244.501	124.235	172.76	91.0739	188.501	127.047	-0.458415	0.0353264	0.142604	181.965	135.54
ATP5L	6103.19	7299.57	5160.73	5628.6	4757.86	6724.18	6270.74	-0.0346641	0.783947	0.892525	6048.02	5917.59
ATP5L2	4.16458	5.06739	2.4847	0	6.00487	5.89065	6.9934	1.10575	0.188705	NA	2.92917	6.29631
ATP5O	2673.66	3545.9	2293.38	2991.29	2207.79	2921.76	2688.96	-0.139416	0.31969	0.554609	2876.06	2606.17
ATP5S	256.122	257.17	196.291	242.831	291.236	226.79	347.339	0.267322	0.123131	0.31424	238.103	288.455
ATP5SL	332.125	362.318	376.432	315.317	296.24	340.185	297.219	-0.15343	0.306542	0.542594	346.548	311.215
ATP6AP1	5773.15	6193.62	6548.43	4849.36	4519.67	7389.82	3762.45	-0.197823	0.255219	0.488848	5841.14	5223.98
ATP6AP1L	155.131	95.0135	70.814	136.517	149.121	110.45	150.358	0.269884	0.495054	0.705023	114.369	136.643
ATP6AP2	7039.18	8837.53	6749.69	7585.74	6472.25	8205.68	8375.76	0.0306666	0.813485	0.909257	7553.03	7684.56
ATP6V0A1	3272.32	4897.63	5251.42	4114.83	3741.03	4328.16	3191.32	-0.189045	0.334005	0.567155	4384.05	3753.5
ATP6V0A2	1507.58	1298.52	1499.52	1187.57	1791.45	1462.35	1883.55	0.306514	0.059568	0.20124	1373.3	1712.45
ATP6V0B	16242.9	19881.9	16577.9	15250	15121.3	20604	12281.6	-0.112396	0.543515	0.74102	16988.2	16002.3
ATP6V0C	1014.07	1107.22	983.942	970.114	810.657	1085.35	663.207	-0.274719	0.145314	0.347269	1018.84	853.072
ATP6V0D1	5944.93	6776.36	8521.29	5140.52	5280.28	7255.81	4445.47	-0.224082	0.373663	0.606334	6595.78	5660.52
ATP6V0E1	9923.15	11775.3	13675.8	10341.4	6566.33	9796.15	7210.19	-0.545312	6.58718e-05	0.00167901	11428.9	7857.56
ATP6V0E2	267.574	69.6766	62.1175	80.9435	405.329	72.1605	198.146	0.898947	0.0147098	0.0801397	120.078	225.212
ATP6V0E2-AS1	20.8229	8.86793	17.3929	13.2892	43.0349	14.7266	16.3179	0.638969	0.131587	0.326629	15.0932	24.6932
ATP6V1A	9312	9597.63	10038.2	9480.06	9013.31	10673.9	9788.42	0.0337215	0.885917	0.948082	9606.97	9825.2
ATP6V1B1	0	3.80054	4.9694	4.83245	1.00081	1.47266	5.82783	-0.208088	0.88063	NA	3.4006	2.7671
ATP6V1B1-AS1	3.12343	3.80054	2.4847	1.20811	6.00487	0	1.16557	-0.400468	0.77449	NA	2.6542	2.39015
ATP6V1B2	17766.1	19419.5	23633.2	18002.1	19596.9	20693.9	17059.2	-0.0282854	0.897946	0.953908	19705.2	19116.7
ATP6V1C1	3776.23	5757.82	8685.28	7381.57	3283.66	4400.32	4718.21	-0.580352	0.00980481	0.0608722	6400.22	4134.06
ATP6V1C2	42.6869	44.3396	43.4823	39.8677	43.0349	39.7619	29.1391	-0.185846	0.574872	0.764091	42.5941	37.312
ATP6V1D	1260.83	1612.7	1446.1	1504.1	1396.13	1839.36	1614.31	0.156408	0.259689	0.493447	1455.93	1616.6
ATP6V1E1	5314	6890.38	6210.51	5455.84	3635.95	5613.79	4318.42	-0.405947	0.00108599	0.0131367	5967.68	4522.72
ATP6V1E2	129.102	79.8114	67.087	140.141	84.0682	83.9418	155.02	0.0592832	0.854115	0.93189	104.035	107.677
ATP6V1F	1129.64	1691.24	1352.92	1164.62	971.788	1244.4	948.771	-0.319683	0.111406	0.295243	1334.61	1054.99
ATP6V1G1	5338.99	6626.88	6309.9	5116.36	4924.99	4927.53	4662.26	-0.265255	0.0918956	0.262479	5848.03	4838.26
ATP6V1G2	49.9749	67.1429	40.9976	25.3704	53.043	23.5626	32.6358	-0.351631	0.41016	0.638434	45.8714	36.4138
ATP6V1H	712.143	782.911	895.735	769.568	508.412	618.518	529.167	-0.513216	1.54446e-06	0.000106622	790.089	552.033
ATP7A	1327.46	1830.59	2064.79	2125.07	2599.11	2725.9	2468.67	0.522867	0.00261038	0.0247113	1836.98	2597.89
ATP7B	122.855	108.949	245.985	206.587	133.108	117.813	151.524	-0.289571	0.421561	0.648107	171.094	134.148
ATP8A1	4089.62	3284.93	4469.98	3009.41	4519.67	3443.09	3985.07	0.0844615	0.689225	0.835879	3713.48	3982.61
ATP8A2	10.4114	2.53369	1.24235	6.04056	17.0138	2.94533	5.82783	0.792993	0.236335	0.46825	5.05701	8.59565
ATP8B1	128.061	103.881	142.87	112.354	160.13	125.176	146.861	0.229334	0.306757	0.542727	121.792	144.056
ATP8B2	3232.75	1109.76	911.886	2523.75	5769.68	2234.03	4842.93	1.15978	5.03503e-07	4.80524e-05	1944.54	4282.21
ATP8B3	70.7978	153.288	236.047	80.9435	55.0446	176.72	93.2453	-0.314326	0.378289	0.610658	135.269	108.336
ATP8B4	2121.85	1506.28	2454.89	1218.99	1224.99	1639.07	1074.65	-0.503886	0.1446	0.346108	1825.5	1312.91
ATP8B5P	0	2.53369	4.9694	2.41623	0	1.47266	0	-2.12189	0.185191	NA	2.47983	0.490888
ATP9A	579.917	489.003	518.06	503.783	373.303	700.988	463.895	-0.116895	0.826091	0.9169	522.691	512.729
ATP9B	381.059	525.742	499.425	469.956	580.471	808.492	702.836	0.578608	0.000158147	0.00325487	469.045	697.266
ATPAF1	754.83	553.612	544.15	647.548	544.442	684.788	645.723	0.00322756	0.980956	0.992796	625.035	624.984
ATPAF2	217.599	309.111	275.802	266.993	296.24	372.584	370.65	0.377374	0.0761991	0.23384	267.376	346.491
ATPIF1	914.125	554.879	701.928	704.33	788.64	568.448	610.757	-0.133571	0.458022	0.677846	718.815	655.948
ATR	1574.21	1434.07	1513.18	1618.87	1793.45	1322.45	2019.93	0.136394	0.305376	0.541746	1535.08	1711.94
ATRAID	1051.56	1118.63	915.613	1038.98	858.696	1138.37	1063	-0.0188942	0.878137	0.944183	1031.19	1020.02
ATRIP	336.29	307.844	490.729	306.861	262.213	222.372	270.411	-0.515575	0.00497669	0.0380673	360.431	251.665
ATRN	902.672	943.801	916.855	1042.6	1121.91	1326.87	1384.69	0.422949	0.000594201	0.00845951	951.482	1277.82
ATRNL1	0	0	0	1.20811	0	0	2.33113	1.05395	0.66379	NA	0.302028	0.777044
ATRX	5699.22	6059.33	7018.04	6607.17	6832.54	6475.3	6900.15	0.0966374	0.411924	0.63978	6345.94	6736
ATXN1	4337.41	7017.07	7459.07	6007.94	4900.97	7407.5	5794.03	-0.0141757	0.90422	0.956669	6205.37	6034.17
ATXN10	1045.31	1021.08	785.166	896.42	830.674	1048.54	1083.98	0.0775337	0.619721	0.793194	936.993	987.729
ATXN1L	7569.12	8693.1	9208.31	9262.6	10491.5	10797.6	10659.1	0.303379	0.0127462	0.0729274	8683.28	10649.4
ATXN2	696.526	808.248	766.531	695.873	915.743	905.688	825.221	0.261366	0.017625	0.089877	741.794	882.217
ATXN2L	3480.55	5086.39	4547	3798.31	5381.36	5995.21	5071.38	0.391348	0.00932327	0.0588621	4228.06	5482.65
ATXN3	3201.52	3743.53	3474.86	2711	3649.96	2839.29	2857.97	-0.0758505	0.653812	0.814103	3282.73	3115.74
ATXN3L	0	0	1.24235	1.20811	0	0	3.4967	1.29493	0.550082	NA	0.612616	1.16557
ATXN7	7832.53	16361.3	19072.6	15965.2	11234.1	10930.1	11611.4	-0.304836	0.0756026	0.232595	14807.9	11258.5
ATXN7L1	1304.55	1973.75	1534.3	1942.65	1369.11	1346.01	1227.34	-0.343774	0.0174827	0.0894294	1688.81	1314.16
ATXN7L2	203.023	177.359	132.932	210.212	263.213	269.497	186.491	0.395612	0.118967	0.307534	180.881	239.734
ATXN7L3	4412.37	5159.87	6103.67	4306.92	5711.63	7280.85	5252.04	0.289764	0.0496945	0.179046	4995.71	6081.51
ATXN7L3B	4406.12	2391.81	3040.03	3347.68	4341.52	3257.53	4569.02	0.303092	0.0127102	0.072823	3296.41	4056.02
AUH	457.062	515.607	393.825	509.824	482.391	457.998	571.127	0.0997596	0.609561	0.785881	469.079	503.839
AUNIP	40.6046	31.6712	26.0894	68.8624	25.0203	47.1252	38.4637	-0.188187	0.644649	0.807934	41.8069	36.8697
AUP1	5117.22	5487.98	4096.03	5268.58	4406.57	5898.02	5022.42	0.0305426	0.828962	0.918174	4992.45	5109
AURKA	80.1681	79.8114	94.4187	165.511	63.0511	47.1252	71.0995	-0.778853	0.0170218	0.088091	104.977	60.4253
AURKAIP1	396.676	562.48	499.425	370.891	346.281	379.947	247.1	-0.477564	0.0922591	0.263043	457.368	324.443
AURKAPS1	183.241	159.623	212.442	212.628	216.175	192.919	202.808	0.0936487	0.669852	0.825745	191.983	203.968
AURKB	222.805	239.434	183.868	303.236	96.0779	126.649	76.9273	-1.26324	2.82885e-05	0.000941899	237.336	99.8848
AURKC	90.5796	48.1402	47.2093	79.7354	43.0349	33.8713	55.9472	-0.576765	0.0888726	0.257221	66.4161	44.2844
AUTS2	447.692	88.6793	149.082	253.704	569.462	198.81	379.974	0.759714	0.0625403	0.207477	234.789	382.749
AVEN	140.554	92.4798	77.0258	151.014	138.112	141.376	186.491	0.438758	0.0384525	0.150207	115.269	155.326
AVIL	1731.42	1545.55	1652.33	1790.42	1824.48	933.668	1083.98	-0.375282	0.329161	0.56283	1679.93	1280.71
AVL9	4690.36	5880.7	6703.73	6428.37	4258.45	5179.36	4501.42	-0.340772	0.0151437	0.0817171	5925.79	4646.41
AVPI1	22.9052	40.5391	34.7858	31.4109	32.026	32.3986	37.2981	0.0689283	0.877067	0.944032	32.4103	33.9076
AVPR1A	64.551	60.8087	23.6047	39.8677	35.0284	20.6173	41.9604	-0.518577	0.220345	0.448954	47.208	32.5354
AVPR1B	0	0	7.45411	4.83245	4.00325	1.47266	0	-0.760074	0.647213	NA	3.07164	1.8253
AVPR2	24.9875	39.2723	50.9364	14.4974	65.0528	41.2346	34.967	0.629489	0.239111	0.471394	32.4234	47.0848
AWAT1	3.12343	1.26685	0	0	5.00406	0	3.4967	1.3653	0.386364	NA	1.09757	2.83359
AXDND1	6.24687	2.53369	4.9694	8.45679	9.00731	4.41799	6.9934	0.293896	0.695853	0.839663	5.55169	6.80623
AXIN1	882.89	776.577	954.126	700.705	1005.82	877.707	695.843	0.0543523	0.805201	0.90456	828.575	859.789
AXIN2	310.261	59.5418	36.0282	86.9841	705.572	142.848	376.478	1.82675	2.50598e-07	2.79834e-05	123.204	408.299
AXL	11.4526	26.6038	24.847	28.9947	31.0252	4.41799	17.4835	-0.220162	0.724644	0.855952	22.9745	17.6422
AZI2	2187.44	2934.02	4190.45	4074.96	1443.17	1915.93	1904.53	-0.904238	9.51689e-06	0.000414166	3346.72	1754.55
AZIN1	8415.57	8838.79	9497.77	9457.11	7591.16	10690.1	9065.77	0.000920497	0.995709	0.998683	9052.31	9115.66
AZIN1-AS1	14.576	7.60108	19.8776	8.45679	10.0081	13.254	6.9934	-0.340229	0.547867	0.743919	12.6279	10.0852
AZIN2	38.5223	24.0701	27.3317	22.9541	80.0649	20.6173	44.2915	0.708218	0.110434	0.293797	28.2196	48.3246
AZU1	142.637	96.2804	245.985	21.746	12.0097	39.7619	10.4901	-2.95898	0.00106269	0.0129215	126.662	20.7539
B2M	760548	1.01213e+06	978341	751308	627949	708376	705273	-0.340756	0.00613804	0.0441854	875581	680533
B3GALNT1	40.6046	25.3369	22.3623	62.8219	27.0219	25.0353	34.967	-0.374625	0.419911	0.646668	37.7814	29.0081
B3GALNT2	518.49	231.833	441.035	386.596	619.502	279.806	519.842	0.216824	0.352081	0.584368	394.488	473.05
B3GALT2	11.4526	11.4016	16.1506	4.83245	7.00568	23.5626	18.6491	0.542352	0.477187	0.691047	10.9593	16.4058
B3GALT4	119.732	177.359	180.141	105.106	81.0657	139.903	92.0797	-0.480308	0.0283196	0.122333	145.584	104.349
B3GALT6	120.773	120.35	75.7834	89.4003	84.0682	83.9418	96.742	-0.19966	0.420958	0.647613	101.577	88.2506
B3GAT1	282.15	21.5364	14.9082	115.979	236.192	78.0511	233.113	1.16081	0.0693491	0.220315	108.643	182.452
B3GAT3	380.018	338.248	290.71	247.663	393.319	366.693	276.239	0.133427	0.486198	0.698429	314.16	345.417
B3GLCT	267.574	206.496	132.932	205.379	297.241	315.15	264.583	0.543243	0.0149161	0.0808877	203.095	292.325
B3GNT2	2520.61	3259.6	2607.69	2889.81	2291.86	4066.02	2579.4	0.0569017	0.806803	0.905363	2819.43	2979.09
B3GNT3	1.04114	6.33424	1.24235	2.41623	7.00568	4.41799	5.82783	1.15838	0.340235	NA	2.75849	5.7505
B3GNT4	5.20572	7.60108	11.1812	6.04056	9.00731	16.1993	12.8212	0.777683	0.233266	0.464693	7.50713	12.6759
B3GNT5	5001.66	6341.84	10022	14757.1	5775.68	5918.63	8872.29	-0.325832	0.424605	0.650723	9030.66	6855.53
B3GNT7	106.197	5.06739	34.7858	60.4056	138.112	19.1446	127.047	0.879151	0.270674	0.505071	51.6139	94.7678
B3GNT8	96.8264	130.485	320.527	114.771	75.0609	144.321	59.4439	-0.807531	0.0507749	0.181578	165.652	92.9419
B3GNT9	26.0286	39.2723	49.694	31.4109	24.0195	51.5432	24.4769	-0.157327	0.668164	0.824779	36.6015	33.3465
B3GNTL1	567.424	619.488	474.578	445.794	899.73	779.039	391.63	0.395744	0.24528	0.478464	526.821	690.133
B4GALNT3	154.089	111.483	68.3293	95.4409	139.113	75.1058	95.5764	-0.0955757	0.883664	0.946948	107.336	103.265
B4GALNT4	7.28801	0	3.72705	0	13.0106	4.41799	1.16557	1.27843	0.291897	NA	2.75377	6.19804
B4GALT1	9594.15	9895.34	10174.9	11664.3	10256.3	10653.2	9160.18	-0.0428018	0.756888	0.876063	10332.2	10023.2
B4GALT1-AS1	74.9624	73.4771	22.3623	57.9894	46.0373	48.5979	47.7882	-0.282452	0.453745	0.674547	57.1978	47.4745
B4GALT2	31.2343	30.4043	22.3623	70.0705	15.0122	32.3986	23.3113	-0.713459	0.169815	0.382008	38.5179	23.574
B4GALT3	1566.92	1502.48	1135.51	1800.09	2017.64	2725.9	1762.34	0.513704	0.0206178	0.0995414	1501.25	2168.62
B4GALT4	1321.21	928.599	1661.02	1757.8	727.59	574.339	486.041	-1.25633	0.000165793	0.00336403	1417.16	595.99
B4GALT4-AS1	15.6172	5.06739	24.847	21.746	22.0179	11.7813	16.3179	-0.0348606	0.955437	0.980735	16.8194	16.7057
B4GALT5	21426.8	20427.9	39030.9	19569	11264.1	25818.7	11815.3	-0.732262	0.0149308	0.0809408	25113.7	16299.4
B4GALT6	309.22	121.617	144.113	181.217	183.149	138.43	224.954	-0.0228748	0.93687	0.972905	189.042	182.178
B4GALT7	90.5796	84.8788	121.75	130.476	131.106	75.1058	78.0929	-0.205915	0.481832	0.694977	106.921	94.7684
B4GAT1	33.3166	16.469	14.9082	27.7866	26.0211	16.1993	29.1391	0.0461234	0.895006	0.952449	23.1201	23.7865
B9D1	6.24687	8.86793	16.1506	28.9947	6.00487	1.47266	18.6491	-0.907301	0.222783	0.451257	15.065	8.70886
B9D2	98.9087	195.094	94.4187	131.684	159.129	166.411	114.225	0.201702	0.449559	0.670797	130.027	146.588
BAALC	10.4114	11.4016	8.69646	19.3298	14.0114	16.1993	12.8212	0.194167	0.72277	0.854955	12.4598	14.344
BAALC-AS1	0	0	2.4847	0	0	0	1.16557	-0.240392	0.922003	NA	0.621175	0.388522
BAAT	3.12343	1.26685	0	4.83245	3.00244	0	2.33113	-0.402194	0.723936	NA	2.30568	1.77786
BABAM1	1219.18	1189.57	1079.6	994.277	1130.92	1064.74	914.969	-0.113972	0.473133	0.687984	1120.66	1036.87
BACE1	432.075	421.86	352.828	402.301	625.507	438.854	566.465	0.404175	0.0176363	0.0898866	402.266	543.609
BACE1-AS	23.9463	13.9353	14.9082	20.5379	24.0195	26.5079	34.967	0.63138	0.0825893	0.245866	18.3319	28.4981
BACE2	72.8801	13.9353	268.348	76.1111	122.099	104.559	261.087	0.538848	0.432108	0.656813	107.819	162.582
BACH1	15562	29284.4	31242.6	22257.1	16356.3	20761.6	18130.4	-0.340782	0.14698	0.350035	24586.5	18416.1
BACH1-IT2	70.7978	144.421	161.506	137.725	134.109	273.915	179.497	0.641076	0.00758547	0.0512831	128.612	195.84
BACH2	1338.91	254.636	1462.25	357.601	1934.57	403.51	958.095	0.138841	0.768124	0.883559	853.349	1098.72
BAD	80.1681	81.0782	84.4799	51.9488	58.0471	67.7425	58.2783	-0.27831	0.440665	0.664112	74.4188	61.356
BAG1	2156.21	3262.13	2135.6	2154.06	1881.53	2487.33	2037.41	-0.180659	0.291202	0.527545	2427	2135.42
BAG2	112.444	65.876	63.3599	78.5273	107.087	58.9065	86.2519	0.0566072	0.810772	0.907799	80.0517	84.0817
BAG3	197.817	179.892	149.082	118.395	341.277	240.044	320.531	0.862696	0.0110656	0.0660756	161.297	300.617
BAG4	1212.93	1450.54	1587.72	1284.22	1268.03	1796.65	1348.56	0.0884656	0.651905	0.813215	1383.86	1471.08
BAG5	3194.23	2916.28	2400.22	3072.23	3716.01	3376.82	3577.12	0.29393	0.0134408	0.0754811	2895.74	3556.65
BAG6	5463.93	7270.44	6335.99	5575.44	6407.2	8476.65	6080.76	0.183095	0.0768119	0.234698	6161.45	6988.2
BAHCC1	63.5098	81.0782	85.7222	60.4056	49.0398	64.7972	48.9538	-0.414319	0.150377	0.35446	72.679	54.2636
BAHD1	1047.39	838.653	798.832	750.238	1252.02	917.469	1099.13	0.33698	0.0457738	0.169496	858.778	1089.54
BAIAP2	240.504	145.687	207.473	189.674	405.329	210.591	142.199	0.343087	0.35307	0.58536	195.835	252.706
BAIAP2-AS1	425.828	228.032	218.654	314.109	523.425	349.021	412.61	0.552862	0.103666	0.282236	296.656	428.352
BAIAP2L1	244.669	428.194	622.418	361.226	273.222	515.432	230.782	-0.275176	0.354715	0.586893	414.127	339.812
BAIAP2L2	39.5635	34.2049	29.8164	28.9947	35.0284	30.9259	17.4835	-0.262736	0.54738	0.743672	33.1449	27.8126
BAIAP3	950.565	306.577	229.835	349.145	704.571	151.684	191.153	-0.500032	0.182212	0.398801	459.03	349.136
BAK1	1746	2399.41	3263.66	2603.48	1791.45	1500.64	1984.96	-0.496226	0.0628421	0.207932	2503.14	1759.02
BAMBI	58.3041	63.3424	258.409	149.806	25.0203	8.83598	64.1061	-1.91315	0.00537692	0.040174	132.465	32.6541
BANF1	1009.91	1130.03	749.138	1028.1	586.476	846.781	769.273	-0.420159	0.0190933	0.0946021	979.295	734.177
BANK1	979.717	326.847	2613.91	805.811	590.479	223.845	1065.33	-1.17167	0.0467469	0.172069	1181.57	626.55
BANP	758.994	723.37	781.439	653.589	977.793	871.817	852.029	0.308624	0.0455695	0.16916	729.348	900.546
BAP1	3161.96	3906.96	3869.92	3363.39	4492.64	5004.11	3872.01	0.325718	0.115276	0.301698	3575.56	4456.25
BARD1	409.17	312.911	437.308	497.742	314.255	381.42	371.816	-0.215833	0.2546	0.488227	414.283	355.83
BARX2	4.16458	0	1.24235	0	3.00244	1.47266	0	0.477468	0.804799	NA	1.35173	1.4917
BASP1	16543.8	28848.6	25983.8	16623.6	10751.7	30992.2	15361	-0.31842	0.284865	0.520578	22000	19035
BATF	224.887	776.577	757.834	409.55	206.167	335.767	163.179	-1.09529	0.0198958	0.097344	542.212	235.038
BATF2	520.572	2185.31	3287.26	1145.29	247.2	150.212	355.498	-2.41877	9.07911e-05	0.00214437	1784.61	250.97
BATF3	22.9052	36.7386	16.1506	15.7055	15.0122	32.3986	20.9802	-0.0386034	0.957008	0.981523	22.8749	22.797
BAX	1304.55	1678.57	1226.2	1030.52	1214.99	1399.03	997.724	-0.117274	0.532548	0.731798	1309.96	1203.91
BAZ1A	17345.5	20667.3	30369.3	18374.2	13973.3	16648.5	14312	-0.499655	0.00582498	0.0426291	21689.1	14977.9
BAZ1B	2750.7	2515.96	2755.53	2985.25	3066.49	2288.52	3278.74	0.0488584	0.68548	0.833479	2751.86	2877.91
BAZ2A	18347	28531.9	34875.3	24035.4	23659.2	24553.7	22952.3	-0.10684	0.365172	0.59722	26447.4	23721.7
BAZ2B	11383.9	12487.3	17077.4	12133.1	16520.4	12159.8	9931.79	0.0022387	0.993636	0.998205	13270.4	12870.7
BBC3	104.114	186.227	57.1481	48.3245	65.0528	70.6878	26.808	-0.860589	0.0764706	0.234278	98.9534	54.1829
BBIP1	1238.96	1771.05	1552.94	1250.4	1271.03	1503.59	1320.59	-0.0718545	0.605777	0.783781	1453.34	1365.07
BBS1	290.479	315.445	359.039	236.79	359.291	372.584	306.544	0.202477	0.263112	0.497395	300.438	346.14
BBS10	451.857	540.944	657.204	669.294	380.308	375.529	525.67	-0.45148	0.0631956	0.208499	579.825	427.169
BBS12	27.0698	24.0701	42.2399	32.619	39.0317	25.0353	57.1127	0.369493	0.280172	0.515294	31.4997	40.3932
BBS2	1285.81	1074.29	949.156	662.046	1538.25	1120.7	1121.27	0.331983	0.152639	0.357343	992.825	1260.07
BBS4	712.143	1251.64	1042.33	1013.61	886.719	1350.43	876.506	0.0512469	0.788855	0.895819	1004.93	1037.89
BBS5	38.5223	13.9353	24.847	14.4974	53.043	26.5079	39.6292	0.78502	0.0307515	0.129333	22.9505	39.7267
BBS7	350.866	267.305	331.708	309.277	372.302	240.044	362.491	0.0343088	0.839849	0.924747	314.789	324.946
BBS9	364.401	401.591	413.703	316.526	552.448	440.326	518.677	0.419409	0.0209801	0.100784	374.055	503.817
BBX	3346.24	4141.32	4595.46	4233.23	4120.34	3201.57	4458.29	-0.0587504	0.725373	0.856392	4079.06	3926.73
BCAP29	1045.31	1241.51	1114.39	1002.73	795.645	1092.72	1255.31	-0.0707464	0.653292	0.814077	1100.99	1047.89
BCAP31	4431.11	5112.99	4471.22	3737.9	4266.46	6578.39	4453.63	0.178097	0.31711	0.55241	4438.31	5099.49
BCAR3	18.7406	10.1348	22.3623	33.8272	30.0244	13.254	29.1391	0.168214	0.728608	0.857539	21.2662	24.1392
BCAR4	0	1.26685	0	2.41623	1.00081	0	1.16557	-0.431269	0.817073	NA	0.920768	0.722126
BCAS1	34.3578	36.7386	27.3317	72.4868	51.0414	53.0159	104.901	0.715452	0.118026	0.306065	42.7287	69.6527
BCAS2	1452.4	1341.59	1393.92	1454.57	1438.17	1207.58	1543.21	-0.0148473	0.924609	0.966007	1410.62	1396.32
BCAS3	1209.81	1402.4	1427.46	1250.4	1246.01	1384.3	1082.81	-0.0883481	0.56454	0.756113	1322.52	1237.71
BCAS4	97.8676	5.06739	33.5435	20.5379	111.09	20.6173	74.5962	0.884229	0.0311007	0.130267	39.2541	68.7679
BCAT1	638.222	951.402	1685.87	819.1	332.269	1485.92	560.637	-0.483919	0.439996	0.663713	1023.65	792.941
BCAT2	104.114	87.4124	86.9646	100.273	109.088	98.6684	99.0731	0.103151	0.641031	0.806053	94.6912	102.277
BCCIP	901.631	974.205	747.895	1075.22	855.694	818.801	965.089	-0.0743657	0.640658	0.805854	924.738	879.861
BCDIN3D	77.0447	130.485	130.447	93.0247	81.0657	70.6878	79.2585	-0.469471	0.100886	0.278016	107.75	77.004
BCDIN3D-AS1	23.9463	13.9353	12.4235	14.4974	25.0203	25.0353	20.9802	0.530869	0.132045	0.327222	16.2006	23.6786
BCKDHA	397.717	805.715	771.5	591.975	366.297	793.765	377.643	-0.334231	0.239946	0.472317	641.727	512.569
BCKDHB	208.229	64.6092	74.5411	131.684	219.178	107.504	223.789	0.646639	0.00283595	0.0259488	119.766	183.49
BCKDK	940.153	1208.57	975.245	1198.45	870.706	1231.15	942.943	-0.0940955	0.721343	0.854257	1080.6	1014.93
BCL10	1714.76	2813.67	2753.05	2898.26	1774.44	2961.53	2667.98	-0.0222914	0.914953	0.961828	2544.94	2467.98
BCL11A	369.606	305.31	521.787	283.906	360.292	234.153	357.829	-0.312397	0.4467	0.668071	370.153	317.425
BCL11B	5398.33	1368.19	826.163	1296.3	7660.21	2768.61	5923.41	1.45273	4.0988e-05	0.00119576	2222.25	5450.74
BCL2	2499.79	901.995	1247.32	1035.35	2955.4	1821.68	3105.07	0.930929	3.318e-07	3.55981e-05	1421.11	2627.38
BCL2A1	29541.4	46492	63899.1	48341.4	22817.5	40862	48439.8	-0.258193	0.395245	0.625706	47068.5	37373.1
BCL2L1	1127.56	1641.83	877.1	1036.56	782.635	930.723	839.207	-0.452281	0.0918583	0.262464	1170.76	850.855
BCL2L10	4.16458	6.33424	7.45411	1.20811	4.00325	0	3.4967	-1.03685	0.36325	NA	4.79026	2.49998
BCL2L11	3418.08	5463.91	6665.21	4407.19	2827.29	3594.77	2859.13	-0.661285	0.00149462	0.0167812	4988.6	3093.73
BCL2L12	974.511	929.866	995.123	838.43	1198.97	1042.65	1370.71	0.35878	0.00742936	0.0504564	934.483	1204.11
BCL2L13	1728.3	2210.65	1885.89	1485.98	1461.19	1820.21	1382.36	-0.227328	0.0965631	0.270696	1827.7	1554.59
BCL2L14	13.5349	6.33424	14.9082	14.4974	7.00568	19.1446	19.8146	0.349312	0.602281	0.781784	12.3187	15.3216
BCL2L15	434.157	200.162	391.341	119.603	200.162	343.131	121.219	-0.426241	0.429068	0.654236	286.316	221.504
BCL2L2	967.223	1298.52	1027.42	1088.51	734.596	1153.1	1171.39	-0.105711	0.454426	0.67506	1095.42	1019.69
BCL3	2742.37	8604.43	7337.32	4689.89	4122.34	9430.93	6685.69	0.312585	0.325625	0.559863	5843.5	6746.32
BCL6	67001.8	135936	173738	71572.2	46387.6	91290.4	41101.3	-0.878492	0.000957735	0.0120067	112062	59593.1
BCL6B	1.04114	2.53369	4.9694	2.41623	3.00244	1.47266	2.33113	-0.472467	0.700275	NA	2.74012	2.26874
BCL7A	93.703	15.2022	229.835	76.1111	82.0666	32.3986	109.563	-0.681839	0.411787	0.63978	103.713	74.6761
BCL7B	1160.88	1706.44	1202.6	1206.9	1300.05	1381.36	1061.83	-0.0606698	0.791307	0.897366	1319.2	1247.75
BCL7C	12.4937	12.6685	14.9082	14.4974	17.0138	17.672	12.8212	0.216289	0.674539	0.827695	13.6419	15.8357
BCL9	373.771	499.138	432.338	526.737	549.446	854.145	659.71	0.58063	0.00119598	0.014182	457.996	687.767
BCL9L	1343.08	639.758	526.757	559.356	2472	877.707	1331.08	0.990092	0.000402079	0.00642661	767.237	1560.26
BCLAF1	22710.5	25758.8	23258.1	25301.5	37850.7	37495.5	37468.3	0.637155	0.000637843	0.00895272	24257.2	37604.8
BCO2	82.2504	84.8788	132.932	88.1922	76.0617	101.614	96.742	-0.0898749	0.74141	0.864917	97.0632	91.4725
BCOR	846.45	918.464	1376.52	649.965	819.665	480.088	685.353	-0.550181	0.087241	0.254182	947.851	661.702
BCORL1	673.62	890.593	1128.05	589.559	675.548	1013.19	571.127	-0.118088	0.59852	0.779591	820.457	753.289
BCORP1	0	92.4798	0	118.395	0	212.063	609.591	2.08993	0.653503	0.814103	52.7187	273.885
BCR	1866.77	937.467	1010.03	962.866	2372.92	1561.02	1063	0.487964	0.117166	0.304779	1194.28	1665.65
BCRP3	7.28801	3.80054	4.9694	4.83245	12.0097	5.89065	8.15896	0.711013	0.357769	0.589577	5.2226	8.68645
BCS1L	355.03	277.44	268.348	333.439	442.359	265.079	338.014	0.151343	0.32474	0.559233	308.564	348.484
BDH1	269.656	146.954	171.444	120.811	291.236	173.774	194.649	0.305716	0.22499	0.454158	177.217	219.887
BDH2	318.59	235.634	263.378	171.552	303.246	284.224	223.789	0.132582	0.566233	0.757206	247.289	270.42
BDKRB2	5.20572	1.26685	0	1.20811	0	0	0	-2.69932	0.365657	NA	1.92017	0
BDNF	4.16458	7.60108	3.72705	9.6649	7.00568	1.47266	5.82783	-0.426143	0.610241	0.786312	6.2894	4.76872
BDNF-AS	18.7406	10.1348	16.1506	7.24868	20.0162	11.7813	16.3179	0.283807	0.519073	0.721289	13.0687	16.0385
BDP1	2628.89	2110.57	2500.85	2744.83	3441.79	2232.56	3215.8	0.220206	0.0604828	0.203115	2496.29	2963.38
BEAN1	163.46	368.652	299.407	269.409	137.111	247.407	78.0929	-0.852904	0.060555	0.203309	275.232	154.204
BEAN1-AS1	100.991	195.094	144.113	160.679	69.056	123.704	43.1259	-0.974937	0.0210208	0.100864	150.219	78.6285
BECN1	2245.75	3449.62	3371.74	3052.9	2172.76	2808.37	2345.12	-0.288379	0.000663476	0.00915977	3030	2442.08
BEGAIN	29.152	38.0054	42.2399	22.9541	43.0349	39.7619	16.3179	0.00361131	0.994222	0.998602	33.0879	33.0382
BEND2	844.368	434.529	70.814	461.499	614.498	331.349	889.327	0.463769	0.376392	0.608777	452.802	611.725
BEND3	39.5635	11.4016	11.1812	45.9083	24.0195	30.9259	44.2915	0.358761	0.444961	0.666914	27.0136	33.079
BEND3P3	102.032	483.936	505.637	382.972	199.162	537.522	714.492	0.5244	0.250981	0.484269	368.644	483.725
BEND4	88.4973	22.8032	300.649	74.903	43.0349	57.4339	73.4306	-1.02159	0.130225	0.324477	121.713	57.9665
BEND5	39.5635	5.06739	7.45411	30.2028	27.0219	5.89065	29.1391	0.0473374	0.917843	0.963165	20.5719	20.6839
BEND6	0	0	1.24235	0	3.00244	0	3.4967	2.39892	0.156521	NA	0.310588	2.16638
BEND7	499.749	461.132	746.653	341.896	290.235	238.571	127.047	-1.1887	0.0249489	0.112528	512.358	218.618
BEST1	2733	3545.9	4496.07	4360.08	2273.84	4083.69	2532.77	-0.374526	0.238687	0.471013	3783.76	2963.44
BEST2	6.24687	5.06739	11.1812	4.83245	2.00162	0	12.8212	-0.418349	0.647518	NA	6.83197	4.94095
BEST3	2.08229	5.06739	0	8.45679	1.00081	4.41799	24.4769	1.35399	0.16413	0.373609	3.90162	9.96523
BEST4	23.9463	26.6038	23.6047	2.41623	19.0154	17.672	17.4835	-0.085392	0.875235	0.943087	19.1428	18.057
BET1	215.517	263.504	113.054	369.682	235.191	141.376	299.55	-0.106501	0.736924	0.862327	240.439	225.372
BET1L	1968.8	1553.15	1552.94	1479.94	2315.88	1898.26	1402.18	0.189881	0.422991	0.64934	1638.71	1872.11
BEX1	43.7281	83.6119	62.1175	7.24868	15.0122	86.8871	13.9868	-0.775661	0.387298	0.618487	49.1765	38.6287
BEX2	174.912	51.9407	83.2375	45.9083	203.165	116.34	196.981	1.00733	0.00416596	0.0336805	88.9997	172.162
BEX4	958.894	922.265	568.997	414.383	894.726	880.653	694.677	0.196109	0.49469	0.704829	716.135	823.352
BEX5	32.2755	22.8032	11.1812	10.873	45.0365	20.6173	37.2981	0.810858	0.159933	0.368153	19.2832	34.3173
BFAR	1033.86	1265.58	1010.03	1292.68	976.792	1298.89	1221.51	0.018485	0.899295	0.954476	1150.54	1165.73
BFSP1	22.9052	15.2022	11.1812	10.873	9.00731	25.0353	37.2981	0.655897	0.245142	0.478281	15.0404	23.7802
BFSP2	8.32916	1.26685	4.9694	6.04056	2.00162	5.89065	3.4967	-0.344173	0.697242	0.840587	5.15149	3.79632
BGLAP	0	2.53369	4.9694	0	7.00568	1.47266	2.33113	1.37305	0.273319	NA	1.87577	3.60316
BHLHB9	119.732	36.7386	60.8752	42.2839	80.0649	54.4885	100.239	0.306658	0.379115	0.611313	64.9073	78.264
BHLHE40	4260.36	4644.26	1807.62	1562.09	3782.07	4584.4	4046.84	0.418346	0.250867	0.484127	3068.58	4137.77
BHLHE40-AS1	30.1932	13.9353	11.1812	6.04056	20.0162	14.7266	26.808	0.437482	0.435694	0.660198	15.3376	20.517
BHLHE41	15.6172	20.2696	44.7246	136.517	1.00081	14.7266	44.2915	-1.50571	0.12389	0.315296	54.282	20.0063
BHMT	1.04114	0	1.24235	1.20811	0	0	1.16557	-0.9818	0.616047	NA	0.872902	0.388522
BHMT2	4.16458	5.06739	1.24235	1.20811	0	1.47266	1.16557	-1.82044	0.250048	NA	2.92061	0.87941
BICC1	2.08229	3.80054	12.4235	2.41623	1.00081	7.36332	17.4835	0.770857	0.454049	0.674764	5.18064	8.61587
BICD1	130.143	100.081	124.235	142.557	153.124	110.45	123.55	0.0299647	0.892919	0.951647	124.254	129.041
BICD2	4003.2	4705.07	3924.59	3447.95	4142.36	6065.9	4077.15	0.234711	0.220439	0.449002	4020.2	4761.8
BID	2380.06	4090.65	2430.04	1651.49	2685.18	3584.46	2602.71	0.181283	0.495822	0.705708	2638.06	2957.45
BIK	36.4401	62.0755	52.1787	51.9488	35.0284	25.0353	31.4703	-0.661688	0.062821	0.207932	50.6608	30.5113
BIN1	704.855	260.97	264.621	298.404	990.804	441.799	723.816	0.935664	0.000138466	0.00296338	382.212	718.806
BIN2	34481.7	40593.6	39163.9	33498.5	28407	40879.7	26622.7	-0.22133	0.137062	0.334853	36934.4	31969.8
BIN3	1319.13	2510.89	2135.6	1585.04	1624.32	1992.51	1413.83	-0.117876	0.384762	0.616318	1887.67	1676.89
BIN3-IT1	18.7406	43.0728	40.9976	30.2028	45.0365	58.9065	51.2849	0.708284	0.0935798	0.265509	33.2534	51.7426
BIRC2	4459.22	6202.48	7582.07	6836.71	3806.09	3920.23	4876.73	-0.540209	0.00672662	0.0472475	6270.12	4201.01
BIRC3	5131.8	4934.37	7312.48	4404.78	7820.34	4353.19	7917.69	0.234832	0.464065	0.68164	5445.86	6697.07
BIRC5	175.953	121.617	96.9034	337.063	34.0276	76.5785	59.4439	-1.7431	0.00322499	0.0283699	182.884	56.6833
BIRC6	5994.91	5588.06	8111.31	6180.7	6818.53	6096.83	6784.76	0.0259115	0.866713	0.939117	6468.75	6566.7
BIRC6-AS2	22.9052	24.0701	26.0894	16.9136	34.0276	23.5626	38.4637	0.49267	0.181916	0.398472	22.4946	32.018
BISPR	744.418	1801.46	2013.85	1336.17	615.499	499.233	734.306	-1.17896	0.000222135	0.00417053	1473.97	616.346
BIVM	241.546	78.5445	106.842	106.314	158.128	138.43	206.305	0.394336	0.147097	0.350051	133.312	167.621
BLACAT1	8.32916	0	1.24235	0	8.00649	2.94533	0	0.967732	0.397241	NA	2.39288	3.65061
BLACE	0	2.53369	1.24235	2.41623	1.00081	0	5.82783	0.503736	0.824124	NA	1.54807	2.27621
BLCAP	1929.24	2070.03	1694.57	1825.46	1767.43	2120.63	1974.47	0.0552709	0.560008	0.752499	1879.82	1954.18
BLK	414.375	121.617	2232.5	337.063	272.221	103.086	395.127	-1.91415	0.0322775	0.133493	776.39	256.811
BLM	259.245	165.957	182.626	397.469	166.135	170.829	187.656	-0.504897	0.126068	0.31823	251.324	174.873
BLMH	776.694	529.542	485.759	913.333	663.538	824.691	845.035	0.222626	0.260242	0.494087	676.332	777.755
BLNK	170.748	116.55	612.479	440.961	173.14	63.3245	224.954	-1.44322	0.0230381	0.106918	335.184	153.806
BLOC1S1	179.077	283.774	247.228	215.044	154.125	228.263	155.02	-0.356898	0.0342319	0.139499	231.281	179.136
BLOC1S2	3908.46	5539.92	4775.6	4356.45	3240.63	5747.8	3954.76	-0.123973	0.291866	0.527989	4645.11	4314.4
BLOC1S3	873.52	833.585	918.097	942.328	681.553	886.543	759.949	-0.202404	0.127582	0.320518	891.883	776.015
BLOC1S4	275.903	177.359	135.416	161.887	200.162	123.704	155.02	-0.232741	0.208192	0.433174	187.641	159.629
BLOC1S6	3736.67	4917.9	4788.02	4807.08	3891.16	5117.5	6475.88	0.19771	0.317794	0.552898	4562.42	5161.51
BLVRA	874.561	2087.76	2043.67	1161	657.533	1029.39	1030.36	-0.680156	0.0271886	0.119014	1541.75	905.762
BLVRB	258.204	471.267	493.213	314.109	184.149	375.529	188.822	-0.633204	0.0340237	0.138965	384.198	249.5
BLZF1	827.71	1223.77	1264.71	1281.81	935.759	808.492	930.122	-0.323636	0.133526	0.329371	1149.5	891.458
BMF	1199.4	2480.49	2008.88	1432.82	1168.95	2195.74	2059.55	0.0395688	0.897696	0.953766	1780.4	1808.08
BMI1	3.12343	1.26685	1.24235	1.20811	0	1.47266	2.33113	-0.199225	0.911688	NA	1.71019	1.26793
BMP1	61.4275	97.5472	62.1175	85.776	68.0552	151.684	82.7552	0.347286	0.382011	0.614053	76.7171	100.832
BMP10	3.12343	19.0027	9.93881	9.6649	14.0114	11.7813	4.66226	0.0636663	0.92288	0.965003	10.4325	10.1516
BMP2	157.213	32.938	39.7552	19.3298	84.0682	42.7072	5.82783	-0.433639	0.671368	0.826432	62.309	44.2011
BMP2K	1397.22	2039.62	2442.46	2141.98	2131.73	2871.69	3257.76	0.494161	0.025626	0.114121	2005.32	2753.73
BMP3	4.16458	0	0	4.83245	2.00162	0	1.16557	-0.966663	0.484491	0.697196	2.24926	1.05573
BMP6	378.977	239.434	91.934	254.912	283.23	204.7	205.14	-0.0388598	0.930763	0.969692	241.314	231.023
BMP8A	307.138	212.83	231.077	304.444	403.327	349.021	402.12	0.539142	0.23575	0.467873	263.872	384.823
BMP8B	74.9624	34.2049	59.6328	141.349	109.088	57.4339	99.0731	0.153092	0.645508	0.808547	77.5373	88.5318
BMPER	0	0	0	2.41623	0	0	2.33113	0.192802	0.925864	NA	0.604056	0.777044
BMPR1A	178.036	45.6065	142.87	53.157	192.156	83.9418	179.497	0.509781	0.0957821	0.269592	104.917	151.865
BMPR1B	1.04114	5.06739	1.24235	2.41623	4.00325	5.89065	5.82783	1.15563	0.19508	NA	2.44178	5.24058
BMPR2	1635.64	1918.01	2657.39	1884.66	1322.07	1100.08	1364.88	-0.69493	0.000770664	0.0101468	2023.92	1262.34
BMS1	947.441	681.564	652.234	1058.31	1013.82	792.293	1094.47	0.207059	0.197222	0.420223	834.886	966.86
BMS1P20	1748.08	1540.49	1095.75	4881.98	1680.36	1480.03	2284.51	-0.354697	0.410596	0.638686	2316.58	1814.97
BMS1P4	357.113	362.318	329.223	472.372	379.308	337.24	449.908	0.0197349	0.917338	0.962979	380.256	388.819
BMS1P5	49.9749	40.5391	47.2093	27.7866	82.0666	38.2892	40.7948	0.345161	0.2697	0.504057	41.3775	53.7169
BMS1P6	5.20572	0	3.72705	3.62434	10.0081	8.83598	8.15896	1.51449	0.0474945	0.173713	3.13928	9.00102
BMX	967.223	1603.83	2918.28	1512.56	529.429	1094.19	468.557	-1.3192	0.00692425	0.0480802	1750.47	697.392
BNC2	424.787	50.6739	68.3293	256.12	253.205	179.665	418.438	0.841292	0.0995712	0.275812	199.977	283.769
BNIP1	327.96	315.445	195.049	282.698	339.275	335.767	399.789	0.348386	0.19432	0.415983	280.288	358.277
BNIP2	7164.11	10390.7	10809.7	8837.34	7136.79	10974.3	8921.24	-0.0331573	0.707848	0.846811	9300.46	9010.77
BNIP3	476.844	426.927	354.07	287.531	470.381	415.291	399.789	0.146776	0.406579	0.636163	386.343	428.487
BNIP3L	11365.1	14153.2	10684.2	10894.8	12148.9	13793	10739.5	0.0544375	0.746277	0.868496	11774.3	12227.1
BNIPL	260.286	367.386	339.162	283.906	154.125	179.665	166.676	-0.890265	3.91752e-07	4.09593e-05	312.685	166.822
BOC	0	1.26685	4.9694	1.20811	0	2.94533	4.66226	1.083	0.440638	NA	1.86109	2.53586
BOD1	229.052	212.83	171.444	178.801	220.179	222.372	268.08	0.255616	0.0965147	0.270696	198.032	236.877
BOD1L1	17345.5	19893.3	23055.5	20241.9	24186.6	20299.2	17848.3	0.0760876	0.764418	0.881236	20134.1	20778
BOK	42.6869	3.80054	2.4847	15.7055	41.0333	4.41799	33.8014	0.901315	0.290183	0.526629	16.1694	26.4176
BOLA1	21.864	12.6685	9.93881	15.7055	30.0244	14.7266	11.6557	0.338364	0.58427	0.76987	15.0442	18.8022
BOLA3	54.1395	25.3369	26.0894	68.8624	39.0317	32.3986	34.967	-0.280016	0.452767	0.673937	43.6071	35.4657
BOLA3-AS1	164.501	117.817	141.628	130.476	129.105	116.34	141.033	-0.107139	0.647528	0.810027	138.605	128.826
BOLL	3.12343	2.53369	2.4847	1.20811	4.00325	1.47266	9.32453	1.05835	0.185161	0.403428	2.33749	4.93348
BOP1	71.839	40.5391	69.5717	79.7354	76.0617	48.5979	47.7882	-0.19965	0.610179	0.786312	65.4213	57.4826
BORA	279.027	226.766	232.32	281.49	340.276	263.607	303.047	0.240537	0.0965409	0.270696	254.901	302.31
BPGM	812.093	1459.41	1156.63	1051.06	621.504	808.492	641.061	-0.67194	2.02079e-05	0.000730361	1119.8	690.352
BPHL	51.0161	38.0054	59.6328	49.5326	58.0471	38.2892	74.5962	0.180174	0.511033	0.715202	49.5467	56.9775
BPI	6620.64	1380.86	5052.64	759.903	1148.93	1896.79	596.77	-1.83071	0.0664684	0.214529	3453.51	1214.16
BPIFB3	7.28801	0	0	0	0	0	2.33113	-0.0750713	0.970641	NA	1.822	0.777044
BPNT1	352.948	293.909	429.853	316.526	269.218	266.552	427.763	-0.135439	0.529112	0.729557	348.309	321.178
BPTF	6011.57	6787.77	8491.47	7226.93	7590.16	7235.19	7297.61	0.0629096	0.595163	0.778151	7129.43	7374.32
BRAF	671.538	1064.15	1462.25	1123.54	1157.94	1163.4	1115.45	0.156483	0.417218	0.644389	1080.37	1145.6
BRAP	1502.37	2073.83	1844.89	2038.09	1180.96	1540.41	1263.47	-0.482923	1.67558e-05	0.000639642	1864.79	1328.28
BRAT1	250.916	366.119	383.886	283.906	504.409	412.346	307.709	0.35785	0.357911	0.589692	321.207	408.155
BRCA1	991.169	1023.61	1620.03	1519.81	903.733	854.145	721.485	-0.616243	0.00776996	0.0519951	1288.65	826.454
BRCA2	391.47	400.324	694.474	665.67	255.207	288.642	261.087	-0.991046	0.0016873	0.0182577	537.985	268.312
BRCAT107	27.0698	0	2.4847	6.04056	68.0552	0	102.57	2.56953	0.202457	0.426614	8.89875	56.875
BRCAT54	9.3703	5.06739	2.4847	8.45679	1.00081	1.47266	10.4901	-0.564032	0.449967	0.671057	6.34479	4.32119
BRCC3	972.429	1048.95	752.865	1028.1	879.713	960.176	927.79	-0.042249	0.774678	0.887188	950.587	922.56
BRD1	701.731	554.879	616.206	541.234	890.722	687.734	634.068	0.284789	0.109733	0.292461	603.513	737.508
BRD2	19079	29963.5	27344.1	25220.6	23491.1	39733.9	28528.4	0.267727	0.103575	0.282099	25401.8	30584.5
BRD3	685.073	673.963	726.775	530.361	647.525	612.628	509.352	-0.1412	0.553495	0.747307	654.043	589.835
BRD4	2508.12	2764.26	3605.3	2775.03	2960.4	3231.02	2434.87	-0.00675041	0.969561	0.987149	2913.18	2875.43
BRD7	2594.53	2893.48	3409.01	2251.92	2544.06	2097.07	1988.46	-0.33658	0.0235547	0.108397	2787.24	2209.86
BRD7P3	23.9463	32.938	24.847	30.2028	50.0406	55.9612	64.1061	1.03272	0.000551837	0.00803502	27.9835	56.7026
BRD8	1997.96	2484.29	2125.66	1647.87	1907.55	2613.98	1783.32	0.0205356	0.940194	0.973853	2063.94	2101.61
BRD9	1025.53	1000.81	904.431	881.922	1068.87	998.466	1058.33	0.124042	0.198164	0.421409	953.173	1041.89
BRDT	2.08229	2.53369	1.24235	2.41623	3.00244	0	1.16557	-0.576711	0.671536	NA	2.06864	1.38933
BRE	958.894	1521.48	1064.69	1069.18	821.666	1326.87	989.565	-0.142574	0.320831	0.555824	1153.56	1046.03
BRE-AS1	124.937	101.348	201.261	166.72	86.0698	116.34	186.491	-0.134318	0.797068	0.899608	148.566	129.634
BREA2	37.4812	8.86793	13.6659	7.24868	53.043	22.0899	20.9802	0.99181	0.0166196	0.086634	16.8159	32.0377
BRF1	186.365	92.4798	126.72	125.644	241.196	161.993	146.861	0.471377	0.0416959	0.158692	132.802	183.35
BRF2	488.297	508.006	503.152	518.28	393.319	524.268	350.835	-0.264625	0.0658154	0.213552	504.434	422.807
BRI3	3822.04	6427.98	5432.8	4787.75	2301.87	4853.9	2454.68	-0.714756	6.5329e-05	0.0016696	5117.64	3203.48
BRI3BP	14.576	12.6685	12.4235	10.873	21.017	11.7813	12.8212	0.266709	0.597002	0.778812	12.6353	15.2065
BRICD5	26.0286	11.4016	12.4235	2.41623	27.0219	8.83598	5.82783	0.089014	0.900293	0.95498	13.0675	13.8952
BRIP1	183.241	68.4097	99.3881	146.182	91.0739	75.1058	102.57	-0.445074	0.207543	0.432387	124.305	89.5832
BRIX1	579.917	377.52	355.312	449.418	593.481	553.721	685.353	0.480802	0.00112112	0.0135218	440.542	610.852
BRK1	4694.52	5629.87	3981.73	4270.68	3275.66	5930.41	4950.16	0.00154389	0.991967	0.997588	4644.2	4718.74
BRMS1	1421.16	2109.3	2044.91	1548.8	1390.13	1814.32	1051.34	-0.318098	0.166491	0.37644	1781.04	1418.6
BRMS1L	145.76	168.491	118.023	164.303	220.179	159.048	266.915	0.514806	0.0147363	0.0802309	149.144	215.38
BROX	4972.51	8016.61	7808.18	6469.44	4509.66	5713.93	4295.11	-0.46811	0.00090068	0.0114432	6816.68	4839.57
BRPF1	1645.01	1880	1657.3	1623.7	1995.62	2406.33	1692.4	0.250602	0.12282	0.313846	1701.5	2031.45
BRPF3	1678.32	2167.58	1962.91	1997.01	2398.95	2728.84	1847.42	0.259931	0.117822	0.305874	1951.46	2325.07
BRSK1	37.4812	83.6119	80.7528	36.2434	28.0227	39.7619	34.967	-0.754213	0.0397498	0.153136	59.5223	34.2505
BRSK2	8.32916	2.53369	2.4847	0	7.00568	4.41799	2.33113	0.524394	0.666619	NA	3.33689	4.58493
BRWD1	5988.66	4730.41	5263.84	4987.09	7749.28	6248.51	7257.98	0.427431	0.000103503	0.00235645	5242.5	7085.26
BRWD1-AS1	2.08229	2.53369	0	0	1.00081	2.94533	2.33113	0.845108	0.523082	NA	1.154	2.09242
BRWD1-IT2	2.08229	2.53369	1.24235	2.41623	2.00162	2.94533	4.66226	0.614744	0.53767	NA	2.06864	3.20307
BRWD3	5604.48	7552.94	10191	8284.03	9796.95	9645.94	9713.83	0.344105	0.054084	0.189241	7908.11	9718.9
BSCL2	54.1395	39.2723	19.8776	49.5326	26.0211	51.5432	51.2849	0.0628741	0.871486	0.941353	40.7055	42.9497
BSDC1	2716.35	2898.55	3046.24	2546.7	3607.93	3144.14	2933.73	0.211961	0.127378	0.320101	2801.96	3228.6
BSG	1940.69	1693.77	1760.41	891.587	2230.81	1745.11	670.2	-0.0159156	0.96936	0.987149	1571.62	1548.71
BSN	9.3703	2.53369	3.72705	6.04056	3.00244	13.254	15.1524	0.935833	0.124106	0.315582	5.4179	10.4696
BSND	2.08229	7.60108	2.4847	13.2892	1.00081	2.94533	0	-2.45223	0.0596787	NA	6.36433	1.31538
BSPRY	13.5349	5.06739	24.847	9.6649	13.0106	11.7813	13.9868	-0.0519337	0.922522	0.964904	13.2785	12.9262
BST1	5095.36	9122.57	9051.77	8213.96	3451.8	8609.19	5323.14	-0.486161	0.0349257	0.141452	7870.91	5794.71
BST2	1713.72	3515.5	4435.19	2328.03	1339.09	1105.97	997.724	-1.31489	0.00251786	0.0241418	2998.11	1147.59
BTAF1	5314	6626.88	7569.64	6256.82	8191.64	6719.76	8367.6	0.278879	0.149002	0.35239	6441.83	7759.67
BTBD1	2704.89	3129.11	2562.97	3023.91	2145.74	2706.75	2891.77	-0.145552	0.254532	0.488157	2855.22	2581.42
BTBD10	1491.96	1525.28	2105.78	1908.82	1413.15	1806.96	1653.94	-0.109359	0.504077	0.710747	1757.96	1624.68
BTBD11	562.218	404.124	185.11	161.887	677.55	353.439	377.643	0.514527	0.186469	0.405201	328.335	469.544
BTBD18	3.12343	2.53369	6.21175	6.04056	4.00325	8.83598	4.66226	0.347827	0.606072	0.783977	4.47736	5.83383
BTBD19	220.723	238.167	327.981	235.582	382.31	377.002	257.59	0.431897	0.258949	0.492543	255.613	338.967
BTBD2	290.479	282.507	419.915	242.831	312.253	273.915	184.159	-0.265315	0.386325	0.617662	308.933	256.776
BTBD3	239.463	319.245	392.583	270.617	178.144	303.369	243.603	-0.350454	0.301475	0.537708	305.477	241.705
BTBD6	476.844	321.779	203.746	372.099	489.397	382.892	456.902	0.378286	0.0879264	0.255318	343.617	443.064
BTBD7	1578.37	1695.04	1716.93	1512.56	1782.45	1917.41	1829.94	0.184192	0.0640779	0.210287	1625.73	1843.26
BTBD8	26.0286	24.0701	48.4517	38.6596	37.03	22.0899	20.9802	-0.36368	0.329229	0.562888	34.3025	26.7001
BTBD9	740.254	817.116	1022.45	862.592	1083.88	886.543	910.307	0.168603	0.142847	0.343516	860.604	960.243
BTD	426.869	468.733	329.223	376.931	489.397	513.959	416.107	0.239502	0.121792	0.312612	400.439	473.154
BTF3	9111.05	8116.69	6209.27	7168.94	9269.52	9984.66	10388.7	0.372371	0.00102741	0.0126613	7651.49	9880.95
BTF3L4	2019.82	2470.35	1769.11	2121.45	1664.35	2191.32	1843.93	-0.140457	0.316816	0.552158	2095.18	1899.87
BTG1	33124	29973.6	34703.8	28265	31816.8	25462.3	29321	-0.132671	0.387654	0.618635	31516.6	28866.7
BTG2	21113.4	24532.5	26888.2	23579.9	24826.1	39432	40870.6	0.544015	0.0109835	0.0656567	24028.5	35042.9
BTG3	395.635	319.245	212.442	304.444	525.426	500.705	812.399	0.993273	0.000755612	0.0100027	307.942	612.844
BTK	5087.03	7810.11	7555.98	8774.52	3891.16	6428.17	5312.65	-0.486002	0.000727729	0.00974362	7306.91	5210.66
BTLA	848.533	430.728	977.73	700.705	763.619	334.295	791.419	-0.403448	0.401986	0.632173	739.424	629.778
BTN1A1	41.6458	86.1456	81.9952	73.6949	29.0235	20.6173	22.1458	-1.53416	0.000140677	0.00298733	70.8704	23.9289
BTN2A1	9816.95	15423.9	20100	17575.6	8967.27	8299.93	9476.05	-0.769126	4.0352e-05	0.00119133	15729.1	8914.42
BTN2A2	2238.46	2629.97	3459.95	3327.14	1339.09	1008.77	1535.05	-1.19178	0.000187513	0.00369069	2913.88	1294.3
BTN2A3P	284.232	548.545	600.055	471.164	195.158	144.321	199.312	-1.33918	9.46741e-05	0.00219665	475.999	179.597
BTN3A1	28447.2	32475.6	62464.2	52511.8	19649.9	9978.77	28988.8	-1.20154	0.000503946	0.00756149	43974.7	19539.2
BTN3A2	14209.5	16159.9	22390.9	15338.2	10362.4	6874.39	11529.8	-0.875964	0.00435811	0.0346055	17024.6	9588.86
BTN3A3	6461.34	7445.26	9379.75	8037.57	4946.01	2599.25	4389.52	-1.00684	9.93771e-06	0.000427035	7830.98	3978.26
BTNL10	3.12343	1.26685	2.4847	0	3.00244	0	2.33113	-0.173098	0.914139	NA	1.71875	1.77786
BTNL2	13.5349	2.53369	27.3317	14.4974	9.00731	0	11.6557	-1.8879	0.0562979	0.194662	14.4744	6.88765
BTNL3	0	1877.47	49.694	1564.51	0	1080.93	836.876	-0.542839	0.834353	0.921854	872.917	639.27
BTNL8	3230.67	3145.58	5037.73	3392.38	3212.61	2373.93	1835.77	-0.52138	0.216495	0.443999	3701.59	2474.1
BTNL9	27.0698	12.6685	120.508	21.746	15.0122	23.5626	29.1391	-0.951072	0.253009	0.486213	45.4981	22.5713
BTRC	525.778	338.248	336.677	355.185	627.509	400.564	522.173	0.402647	0.00131276	0.015186	388.972	516.749
BUB1	219.681	212.83	203.746	1309.59	60.0487	122.231	195.815	-1.95508	0.00340371	0.0294527	486.463	126.032
BUB1B	190.529	103.881	149.082	378.139	50.0406	94.2504	88.583	-1.44471	0.00430014	0.0342987	205.408	77.6247
BUB3	2608.07	1801.46	1534.3	2087.62	2504.03	1796.65	2285.67	0.126523	0.324821	0.559254	2007.86	2195.45
BUD13	723.595	903.262	795.105	729.7	632.513	783.457	581.617	-0.235265	0.0383529	0.150003	787.915	665.862
BUD31	1849.07	3298.87	2935.68	2549.12	1497.21	2300.3	1593.33	-0.544665	0.00227237	0.0225111	2658.18	1796.95
BVES	3.12343	2.53369	6.21175	20.5379	1.00081	0	2.33113	-2.83382	0.0384018	0.150087	8.1017	1.11065
BYSL	119.732	88.6793	110.569	184.841	77.0625	120.758	109.563	-0.295062	0.282567	0.518336	125.955	102.461
BZRAP1	1092.16	880.459	947.914	797.354	1263.02	1248.82	1496.59	0.525599	0.0994999	0.275719	929.472	1336.14
BZRAP1-AS1	424.787	407.925	344.131	450.626	618.502	528.686	780.929	0.65749	0.0073148	0.0500302	406.867	642.706
BZW1	6736.2	6623.08	7604.43	6718.31	7048.72	9012.7	8154.3	0.221765	0.0649587	0.211972	6920.51	8071.9
BZW2	580.959	372.453	336.677	681.376	456.37	564.03	574.624	0.130655	0.573859	0.763236	492.866	531.675
C10orf10	103.073	172.291	134.174	112.354	92.0747	142.848	106.066	-0.187453	0.591628	0.775868	130.473	113.663
C10orf105	2734.05	2708.52	4666.27	3270.36	1845.5	2733.26	1558.36	-0.714721	0.00360682	0.0306432	3344.8	2045.71
C10orf11	86.415	136.819	125.477	103.898	52.0422	123.704	88.583	-0.388801	0.0929021	0.264249	113.152	88.1096
C10orf111	3.12343	3.80054	8.69646	12.0811	9.00731	10.3086	8.15896	0.419334	0.649443	0.811466	6.92539	9.1583
C10orf113	0	1.26685	0	0	0	0	0	-0.677428	0.897786	NA	0.316712	0
C10orf12	475.803	701.833	817.467	898.836	674.547	689.206	705.167	-0.0368713	0.846432	0.92795	723.485	689.64
C10orf128	4591.45	1997.82	2572.91	5418.38	2575.09	1346.01	2471	-0.788803	0.0290162	0.12412	3645.14	2130.7
C10orf131	89.5384	191.294	151.567	137.725	67.0544	116.34	99.0731	-0.564821	0.110052	0.293026	142.531	94.156
C10orf2	164.501	57.0081	101.873	184.841	158.128	89.8324	167.841	0.123208	0.681459	0.83184	127.056	138.601
C10orf25	160.336	216.631	144.113	158.263	103.084	201.755	203.974	-0.0166841	0.942015	0.974543	169.836	169.604
C10orf32	731.925	732.238	508.122	712.786	649.527	692.152	704.002	0.0257695	0.871297	0.941353	671.268	681.893
C10orf35	17.6995	10.1348	0	1.20811	32.026	10.3086	13.9868	1.43184	0.0506297	0.181262	7.26059	18.7738
C10orf54	41211.6	33485.3	53368.9	41199.1	44406	44824.9	23327.6	-0.178065	0.569671	0.759735	42316.2	37519.5
C10orf55	9.3703	7.60108	3.72705	1.20811	4.00325	20.6173	11.6557	0.781865	0.474066	0.688609	5.47664	12.0921
C10orf67	1.04114	0	0	0	1.00081	0	0	0.251252	0.906571	NA	0.260286	0.333604
C10orf76	1519.03	1947.14	1534.3	1546.38	1434.16	1780.45	1729.7	0.0154922	0.887257	0.948754	1636.72	1648.1
C10orf82	0	0	0	0	1.00081	4.41799	5.82783	4.04692	0.0976211	NA	0	3.74888
C10orf88	279.027	176.092	121.75	175.176	278.226	161.993	258.756	0.303444	0.121939	0.312791	188.011	232.991
C10orf91	9.3703	0	0	4.83245	8.00649	4.41799	2.33113	0.728626	0.419309	NA	3.55069	4.91854
C10orf95	0	6.33424	0	0	5.00406	4.41799	1.16557	1.16007	0.415427	NA	1.58356	3.5292
C11orf1	137.431	65.876	45.967	79.7354	179.145	91.3051	128.212	0.705255	0.00298213	0.0268954	82.2524	132.888
C11orf16	2.08229	0	3.72705	1.20811	2.00162	0	0	-1.25819	0.555302	NA	1.75436	0.667208
C11orf21	3835.58	5543.72	5822.9	4386.66	3708.01	4821.5	4098.13	-0.196032	0.240335	0.472636	4897.21	4209.21
C11orf24	94.7441	78.5445	154.052	151.014	85.069	66.2698	71.0995	-0.713011	0.0265147	0.117	119.589	74.1461
C11orf30	2019.82	2159.97	2335.62	2289.37	2270.84	2319.44	2342.79	0.0762009	0.514525	0.717947	2201.2	2311.02
C11orf31	271.739	228.032	203.746	225.917	230.187	270.97	259.921	0.123648	0.41858	0.645285	232.358	253.693
C11orf42	18.7406	16.469	29.8164	22.9541	14.0114	41.2346	16.3179	-0.000380651	0.999337	0.999718	21.995	23.8546
C11orf45	18.7406	2.53369	9.93881	3.62434	16.013	4.41799	8.15896	0.168667	0.793177	0.898241	8.70936	9.52998
C11orf49	264.451	276.173	229.835	196.922	302.245	284.224	277.405	0.24887	0.177856	0.393464	241.845	287.958
C11orf54	1580.46	2204.31	2371.65	2204.81	1509.22	1540.41	1435.98	-0.45501	0.0134674	0.0755174	2090.31	1495.2
C11orf57	927.66	784.178	704.413	827.557	730.593	798.183	772.77	-0.0799922	0.416941	0.644089	810.952	767.182
C11orf58	4599.78	5115.53	4549.49	4902.52	4330.51	4674.23	4940.83	-0.0416935	0.663055	0.821376	4791.83	4648.53
C11orf63	67.6744	22.8032	9.93881	54.3651	86.0698	27.9806	81.5896	0.763149	0.00835092	0.0544185	38.6954	65.2133
C11orf65	9.3703	1.26685	6.21175	9.6649	14.0114	5.89065	13.9868	0.759109	0.196572	0.419381	6.62845	11.2963
C11orf68	417.499	710.701	723.048	502.575	269.218	298.951	247.1	-1.06273	1.56513e-10	8.52066e-08	588.456	271.756
C11orf71	318.59	310.378	359.039	241.623	286.232	256.243	296.054	-0.136466	0.347418	0.579913	307.407	279.51
C11orf72	5.20572	3.80054	0	2.41623	1.00081	2.94533	0	-1.29854	0.531936	NA	2.85562	1.31538
C11orf73	414.375	329.38	368.978	283.906	362.294	282.751	283.233	-0.174657	0.258907	0.492543	349.16	309.426
C11orf74	63.5098	63.3424	72.0564	53.157	41.0333	72.1605	86.2519	0.0515985	0.853641	0.931746	63.0164	66.4819
C11orf80	213.435	67.1429	151.567	373.307	250.203	104.559	270.411	-0.0122768	0.975483	0.989616	201.363	208.391
C11orf84	58.3041	44.3396	45.967	48.3245	77.0625	51.5432	47.7882	0.248067	0.368851	0.600971	49.2338	58.798
C11orf85	17.6995	24.0701	58.3905	10.873	5.00406	1.47266	12.8212	-2.16834	0.00938831	0.0590576	27.7583	6.43265
C11orf91	6.24687	3.80054	11.1812	2.41623	6.00487	5.89065	8.15896	0.224217	0.793352	NA	5.9112	6.68483
C11orf94	1.04114	2.53369	0	7.24868	2.00162	1.47266	2.33113	-0.595171	0.669838	NA	2.70588	1.93514
C11orf95	115.567	82.3451	74.5411	80.9435	123.1	136.958	129.378	0.553851	0.00494757	0.0378975	88.3492	129.812
C12orf10	273.821	296.442	239.774	240.414	254.206	315.15	209.802	-0.0187917	0.910686	0.959801	262.613	259.719
C12orf29	304.014	140.62	167.717	167.928	268.218	187.028	251.762	0.285166	0.0955173	0.269032	195.07	235.669
C12orf4	478.926	616.955	778.954	669.294	431.35	475.67	544.319	-0.379333	0.0419826	0.159413	636.032	483.78
C12orf40	1.04114	0	0	1.20811	9.00731	1.47266	1.16557	2.59669	0.0557826	NA	0.562314	3.88184
C12orf42	47.8926	10.1348	162.748	16.9136	41.0333	11.7813	33.8014	-1.2674	0.0796547	0.240355	59.4222	28.872
C12orf43	223.846	184.96	171.444	211.42	189.153	203.228	213.299	0.0256958	0.872976	0.942013	197.917	201.893
C12orf45	69.7567	46.8733	45.967	80.9435	64.0519	55.9612	92.0797	0.209153	0.442612	0.664997	60.8851	70.6976
C12orf49	858.944	663.828	654.719	793.73	731.593	861.508	878.837	0.15395	0.356982	0.588813	742.805	823.979
C12orf54	1.04114	0	0	0	0	1.47266	5.82783	2.6675	0.0951447	NA	0.260286	2.4335
C12orf56	4.16458	2.53369	2.4847	0	1.00081	2.94533	4.66226	0.308953	0.826218	NA	2.29574	2.86947
C12orf57	171.789	48.1402	65.8446	78.5273	260.211	63.3245	124.716	0.666161	0.00577931	0.0424462	91.0752	149.417
C12orf60	13.5349	13.9353	13.6659	22.9541	6.00487	22.0899	9.32453	-0.418928	0.471008	0.68627	16.0225	12.4731
C12orf65	208.229	105.148	127.962	112.354	194.157	151.684	196.981	0.396326	0.0501627	0.180022	138.423	180.941
C12orf66	198.859	98.8141	145.355	113.563	261.212	147.266	230.782	0.594561	0.00467485	0.0363686	139.148	213.087
C12orf71	47.8926	29.1375	39.7552	33.8272	40.0325	42.7072	31.4703	0.0141629	0.966221	0.985676	37.6531	38.07
C12orf73	82.2504	48.1402	52.1787	44.7002	66.0536	63.3245	58.2783	0.149427	0.581558	0.767943	56.8174	62.5521
C12orf74	2.08229	0	17.3929	7.24868	0	0	11.6557	-1.05894	0.464246	0.68164	6.68097	3.88522
C12orf75	591.37	291.375	213.684	614.929	326.265	664.171	859.022	0.606072	0.106142	0.286142	427.84	616.486
C12orf76	717.348	423.127	391.341	414.383	542.44	673.007	735.472	0.443336	0.113252	0.298639	486.55	650.306
C12orf79	185.324	116.55	85.7222	94.2328	261.212	150.212	173.669	0.675124	0.0174264	0.0892525	120.457	195.031
C14orf1	382.1	224.232	209.957	225.917	245.199	235.626	196.981	-0.190878	0.403489	0.633503	260.552	225.935
C14orf119	684.032	965.337	860.949	851.719	338.274	559.612	446.412	-0.912008	7.79524e-11	5.11835e-08	840.509	448.099
C14orf132	42.6869	7.60108	1.24235	15.7055	82.0666	35.3439	108.398	2.43705	1.70011e-05	0.000646081	16.809	75.2694
C14orf142	150.966	193.828	137.901	163.095	100.081	178.192	153.855	-0.180081	0.327586	0.561307	161.447	144.043
C14orf159	8507.19	9743.32	7947.32	9837.66	8683.04	8367.67	7796.47	-0.119189	0.589674	0.774556	9008.87	8282.39
C14orf166	1911.54	2294.26	1652.33	2061.04	1674.36	1974.84	1968.64	-0.0788064	0.615426	0.790384	1979.79	1872.61
C14orf169	186.365	88.6793	113.054	144.974	219.178	129.594	179.497	0.401446	0.0313009	0.130906	133.268	176.09
C14orf178	2.08229	3.80054	0	2.41623	0	1.47266	3.4967	-0.358093	0.786187	NA	2.07476	1.65645
C14orf2	3609.65	5519.65	3682.33	3278.82	2246.82	4575.56	2866.13	-0.347187	0.030289	0.127963	4022.61	3229.5
C14orf28	157.213	165.957	176.414	167.928	136.11	138.43	142.199	-0.263712	0.17623	0.391026	166.878	138.913
C14orf37	0	6.33424	1.24235	1.20811	3.00244	4.41799	2.33113	0.562637	0.686191	NA	2.19617	3.25052
C14orf79	26.0286	39.2723	53.4211	30.2028	31.0252	17.672	26.808	-0.505984	0.195657	0.418039	37.2312	25.1684
C14orf80	21.864	21.5364	16.1506	21.746	25.0203	38.2892	24.4769	0.487249	0.331024	0.564629	20.3243	29.2621
C14orf93	689.238	1344.12	1356.65	989.444	477.387	731.914	525.67	-0.889252	6.06718e-08	9.764e-06	1094.86	578.324
C15orf26	185.324	53.2076	13.6659	124.436	173.14	45.6526	188.822	0.581963	0.340148	0.572459	94.1582	135.872
C15orf27	7.28801	5.06739	2.4847	6.04056	4.00325	4.41799	6.9934	-0.0317797	0.966567	NA	5.22017	5.13821
C15orf39	4393.63	5322.02	5332.17	4959.3	5571.52	3856.9	3381.31	-0.210336	0.542397	0.740104	5001.78	4269.91
C15orf40	336.29	366.119	250.955	273.033	329.267	290.115	268.08	-0.0489798	0.762736	0.879853	306.599	295.821
C15orf41	68.7155	30.4043	45.967	60.4056	62.0503	45.6526	64.1061	0.156234	0.512154	0.716221	51.3731	57.2697
C15orf43	16.6583	6.33424	4.9694	3.62434	34.0276	27.9806	33.8014	2.03147	0.00346523	0.0298089	7.89657	31.9365
C15orf48	35.3989	50.6739	59.6328	90.6084	15.0122	33.8713	55.9472	-0.697186	0.255139	0.488848	59.0785	34.9435
C15orf52	555.971	283.774	226.108	467.54	318.258	294.533	390.465	-0.16551	0.578119	0.766112	383.348	334.418
C15orf53	12.4937	5.06739	1.24235	3.62434	9.00731	16.1993	19.8146	1.35573	0.0497383	0.179094	5.60695	15.0071
C15orf54	22.9052	24.0701	2.4847	50.7407	60.0487	2.94533	23.3113	-0.153838	0.849583	0.929418	25.0502	28.7684
C15orf56	2.08229	0	0	0	0	0	0	-0.997161	0.693222	NA	0.520572	0
C15orf57	731.925	866.523	920.582	989.444	660.536	840.891	777.432	-0.203304	0.114934	0.301333	877.119	759.62
C15orf61	14.576	7.60108	7.45411	3.62434	12.0097	13.254	12.8212	0.636074	0.28216	0.517967	8.31389	12.695
C15orf62	127.02	82.3451	104.357	101.481	162.131	169.356	138.702	0.59609	0.00498275	0.0380959	103.801	156.73
C15orf65	21.864	12.6685	19.8776	18.1217	8.00649	17.672	2.33113	-1.1382	0.142582	0.343013	18.133	9.33653
C16orf13	114.526	93.7467	94.4187	78.5273	98.0795	132.54	86.2519	0.157317	0.657633	0.817311	95.3046	105.624
C16orf45	410.211	592.884	283.256	415.591	262.213	363.748	360.16	-0.360906	0.214402	0.441414	425.486	328.707
C16orf46	14.576	15.2022	13.6659	18.1217	24.0195	22.0899	19.8146	0.506257	0.205552	0.430014	15.3914	21.9747
C16orf47	1.04114	1.26685	0	2.41623	1.00081	4.41799	0	0.367855	0.807488	NA	1.18105	1.80627
C16orf52	398.758	225.499	269.59	217.46	588.477	363.748	496.531	0.785715	7.64725e-05	0.00187358	277.827	482.919
C16orf54	7871.05	7900.06	6866.47	6493.61	8682.04	8785.91	6421.1	0.125654	0.645611	0.808615	7282.8	7963.02
C16orf58	567.424	314.178	407.491	465.123	776.63	440.326	480.213	0.346339	0.0416157	0.158534	438.554	565.723
C16orf59	5.20572	6.33424	3.72705	13.2892	4.00325	2.94533	1.16557	-1.36353	0.150593	NA	7.13906	2.70471
C16orf62	887.055	1016.01	880.827	1052.27	787.639	1038.23	925.459	-0.066695	0.496728	0.705875	959.04	917.109
C16orf70	978.676	1582.29	1116.87	1241.94	872.708	1547.77	1019.87	-0.111126	0.421975	0.648534	1229.95	1146.78
C16orf71	16.6583	21.5364	13.6659	7.24868	19.0154	4.41799	15.1524	-0.202188	0.715231	0.850821	14.7773	12.8619
C16orf72	8312.5	14775.2	16028.8	10816.2	10315.4	13516.1	10006.4	-0.0898403	0.556381	0.749536	12483.2	11279.3
C16orf74	27.0698	16.469	37.2705	27.7866	33.0268	20.6173	29.1391	0.0087267	0.982737	0.99344	27.149	27.5944
C16orf86	28.1109	24.0701	23.6047	22.9541	37.03	27.9806	12.8212	0.0868205	0.865934	0.938796	24.685	25.944
C16orf87	540.354	649.893	667.142	672.919	594.482	886.543	769.273	0.247375	0.340938	0.57347	632.577	750.1
C16orf89	7.28801	0	6.21175	0	13.0106	5.89065	4.66226	1.23602	0.171417	NA	3.37494	7.85449
C16orf90	0	1.26685	3.72705	1.20811	3.00244	1.47266	2.33113	0.611056	0.645021	NA	1.5505	2.26874
C16orf91	80.1681	60.8087	73.2987	59.1975	74.0601	61.8518	46.6226	-0.173271	0.581117	0.767791	68.3683	60.8448
C16orf95	12.4937	32.938	11.1812	26.5785	3.00244	2.94533	9.32453	-2.05863	0.00261526	0.0247156	20.7978	5.09076
C16orf96	15.6172	10.1348	6.21175	1.20811	21.017	13.254	10.4901	0.803554	0.172159	0.385432	8.29295	14.9204
C17orf100	43.7281	15.2022	24.847	14.4974	75.0609	30.9259	62.9406	1.17177	0.00160383	0.0177046	24.5686	56.3091
C17orf104	36.4401	41.806	38.5129	71.2786	31.0252	23.5626	41.9604	-0.549673	0.11522	0.301696	47.0094	32.1827
C17orf105	5.20572	7.60108	13.6659	4.83245	2.00162	1.47266	2.33113	-1.8495	0.0635034	NA	7.82628	1.93514
C17orf107	13.5349	7.60108	6.21175	6.04056	41.0333	29.4533	23.3113	1.85485	0.0139375	0.0771616	8.34707	31.266
C17orf47	5.20572	6.33424	12.4235	6.04056	6.00487	0	3.4967	-1.24838	0.195306	NA	7.50101	3.16719
C17orf50	3.12343	0	0	1.20811	5.00406	1.47266	2.33113	1.45009	0.184481	NA	1.08289	2.93595
C17orf51	153.048	167.224	81.9952	37.4515	198.161	223.845	114.225	0.71933	0.117754	0.305833	109.93	178.744
C17orf53	111.402	73.4771	140.386	138.933	46.0373	61.8518	44.2915	-1.17755	0.0164981	0.0863299	116.05	50.7269
C17orf58	117.649	157.089	121.75	158.263	53.043	103.086	76.9273	-0.858704	8.96358e-05	0.00213242	138.688	77.6856
C17orf59	184.283	108.949	154.052	124.436	132.107	135.485	90.9141	-0.262385	0.417728	0.644516	142.93	119.502
C17orf62	3421.2	5599.46	7555.98	4532.84	3337.71	5407.62	3358	-0.356465	0.116497	0.303636	5277.37	4034.44
C17orf67	102.032	72.2103	106.842	45.9083	198.161	95.7231	159.683	0.83732	0.00167762	0.0181865	81.7482	151.189
C17orf75	332.125	236.9	212.442	276.658	310.252	282.751	256.424	0.105436	0.560753	0.752999	264.531	283.142
C17orf77	5.20572	20.2696	8.69646	8.45679	17.0138	4.41799	9.32453	0.0353508	0.952786	0.97958	10.6571	10.2521
C17orf78	1.04114	2.53369	3.72705	3.62434	4.00325	4.41799	11.6557	1.36715	0.159212	NA	2.73156	6.6923
C17orf80	409.17	390.189	401.279	396.261	391.317	285.697	393.961	-0.17266	0.458355	0.678012	399.225	356.992
C17orf85	3549.26	3515.5	3832.65	3294.52	3554.88	4244.22	3507.19	0.0859747	0.546385	0.743136	3547.98	3768.76
C17orf89	80.1681	70.9434	33.5435	76.1111	47.0381	50.0705	67.6028	-0.246259	0.42201	0.648534	65.1915	54.9038
C17orf96	19.7817	43.0728	48.4517	42.2839	25.0203	53.0159	24.4769	-0.167578	0.757469	0.876316	38.3975	34.171
C17orf97	41.6458	67.1429	57.1481	91.8166	48.039	60.3792	39.6292	-0.370604	0.321752	0.556488	64.4383	49.3491
C17orf99	1.04114	0	8.69646	0	3.00244	0	0	-0.907061	0.61018	NA	2.4344	1.00081
C18orf21	640.304	787.979	642.295	787.689	600.487	807.019	656.214	-0.0582471	0.721944	0.85466	714.567	687.907
C18orf25	6681.02	7853.18	13668.3	7820.11	6416.2	5569.61	4859.24	-0.643269	0.000666157	0.00916889	9005.67	5615.02
C18orf54	111.402	55.7413	75.7834	91.8166	111.09	88.3598	93.2453	0.228678	0.380986	0.612766	83.6859	97.5651
C18orf61	10.4114	16.469	16.1506	4.83245	30.0244	32.3986	15.1524	1.1573	0.0525652	0.185721	11.9659	25.8584
C18orf65	18.7406	21.5364	13.6659	12.0811	6.00487	13.254	15.1524	-0.568593	0.386051	0.617404	16.506	11.4704
C18orf8	2203.06	2538.76	2400.22	2373.94	2369.92	2694.97	2306.65	0.0473333	0.680321	0.83116	2379	2457.18
C19orf12	427.91	260.97	572.724	295.988	517.42	309.259	484.875	0.141687	0.551062	0.74584	389.398	437.185
C19orf18	26.0286	39.2723	37.2705	18.1217	21.017	25.0353	27.9736	-0.299414	0.508628	0.713488	30.1733	24.6753
C19orf24	19.7817	19.0027	21.12	9.6649	26.0211	19.1446	12.8212	0.141076	0.862748	0.937003	17.3923	19.329
C19orf25	70.7978	63.3424	70.814	37.4515	77.0625	73.6332	33.8014	0.0318304	0.952513	0.979475	60.6014	61.499
C19orf35	605.946	590.351	734.229	519.488	365.296	506.596	305.378	-0.651165	0.00167507	0.0181865	612.504	392.424
C19orf38	2414.41	4336.42	4112.18	3081.9	1971.6	4161.75	1962.81	-0.394919	0.0664402	0.214529	3486.23	2698.72
C19orf43	1804.3	1901.54	1459.76	1268.52	1186.96	1513.9	1329.91	-0.265355	0.0863763	0.252514	1608.53	1343.59
C19orf44	63.5098	76.0108	73.2987	79.7354	69.056	107.504	57.1127	0.0745514	0.792355	0.897806	73.1387	77.891
C19orf45	33.3166	51.9407	75.7834	49.5326	46.0373	64.7972	60.6094	0.18097	0.716596	0.851369	52.6433	57.148
C19orf47	107.238	108.949	106.842	94.2328	117.095	94.2504	58.2783	-0.206396	0.526676	0.727911	104.315	89.8746
C19orf48	133.266	102.615	113.054	152.222	167.136	128.122	90.9141	0.0299694	0.91801	0.963192	125.289	128.724
C19orf52	141.596	116.55	115.539	125.644	141.114	120.758	93.2453	-0.0776536	0.685178	0.833383	124.832	118.373
C19orf53	574.712	642.291	467.124	484.453	701.569	619.991	468.557	0.144971	0.592845	0.776546	542.145	596.706
C19orf54	373.771	489.003	449.731	560.564	264.214	362.275	354.332	-0.514053	0.00475175	0.0367577	468.267	326.94
C19orf57	8.32916	8.86793	8.69646	2.41623	9.00731	1.47266	9.32453	-0.0659797	0.917094	0.962846	7.07744	6.6015
C19orf60	40.6046	32.938	27.3317	22.9541	60.0487	33.8713	30.3047	0.405156	0.270545	0.505018	30.9571	41.4082
C19orf66	1199.4	1812.86	2083.42	1453.36	1024.83	1016.14	797.247	-0.763951	0.0213211	0.10174	1637.26	946.072
C19orf67	2.08229	0	2.4847	0	3.00244	4.41799	0	1.03191	0.429752	NA	1.14175	2.47347
C19orf68	454.98	568.814	556.573	416.799	410.333	379.947	571.127	-0.139216	0.472498	0.687655	499.292	453.802
C19orf70	92.6619	78.5445	80.7528	56.7813	94.0763	66.2698	67.6028	-0.0325486	0.922613	0.964937	77.1851	75.983
C19orf71	62.4687	55.7413	77.0258	43.4921	111.09	48.5979	26.808	0.00667998	0.990057	0.996859	59.6819	62.1653
C19orf84	58.3041	10.1348	13.6659	14.4974	36.0292	29.4533	33.8014	0.638143	0.225477	0.454811	24.1505	33.0946
C1D	1635.64	2054.83	2056.09	1820.63	1636.33	2141.25	1960.48	0.0260561	0.86954	0.940345	1891.8	1912.69
C1GALT1	6239.58	10334.9	11334	10603.6	6335.14	6042.34	7318.59	-0.513229	0.0105416	0.0638157	9628.02	6565.35
C1GALT1C1	675.703	1052.75	1627.48	1072.8	636.516	1120.7	777.432	-0.366188	0.0140443	0.077674	1107.18	844.882
C1orf100	49.9749	38.0054	36.0282	33.8272	28.0227	45.6526	33.8014	-0.160208	0.63304	0.801492	39.4589	35.8256
C1orf101	61.4275	39.2723	37.2705	51.9488	43.0349	41.2346	54.7816	-0.0377199	0.896913	0.953736	47.4798	46.3504
C1orf105	1.04114	10.1348	2.4847	1.20811	7.00568	19.1446	10.4901	1.79645	0.074088	0.229954	3.71718	12.2135
C1orf106	17.6995	5.06739	16.1506	0	2.00162	4.41799	1.16557	-2.09545	0.0600253	0.202116	9.72935	2.52839
C1orf109	174.912	140.62	115.539	164.303	196.159	178.192	174.835	0.298651	0.0979751	0.273391	148.844	183.062
C1orf111	1.04114	0	4.9694	10.873	2.00162	0	1.16557	-1.97343	0.19553	NA	4.22089	1.05573
C1orf112	472.68	608.087	649.75	623.386	519.421	365.22	439.418	-0.415733	0.0337465	0.138143	588.475	441.353
C1orf115	74.9624	98.8141	130.447	114.771	63.0511	36.8166	36.1325	-1.27288	0.0019797	0.02042	104.749	45.3334
C1orf116	51.0161	93.7467	63.3599	79.7354	46.0373	36.8166	58.2783	-0.595286	0.0947909	0.267767	71.9645	47.0441
C1orf122	142.637	239.434	185.11	140.141	114.093	142.848	73.4306	-0.668176	0.00257527	0.0244971	176.831	110.124
C1orf123	804.805	596.685	623.66	538.818	664.539	683.316	762.28	0.133614	0.255776	0.489228	640.992	703.378
C1orf127	6.24687	20.2696	4.9694	25.3704	10.0081	36.8166	12.8212	0.43032	0.458712	0.678234	14.214	19.882
C1orf131	300.891	324.313	263.378	357.601	194.157	228.263	214.464	-0.549267	0.00650824	0.0460862	311.546	212.295
C1orf145	26.0286	10.1348	17.3929	14.4974	51.0414	19.1446	33.8014	0.979406	0.0525437	0.185685	17.0134	34.6625
C1orf146	22.9052	5.06739	7.45411	9.6649	16.013	10.3086	12.8212	0.266682	0.587443	0.772666	11.2729	13.0476
C1orf159	18.7406	13.9353	6.21175	16.9136	26.0211	7.36332	9.32453	-0.00804552	0.99014	0.996881	13.9503	14.2363
C1orf162	6621.68	9574.83	12278.2	9848.53	3926.18	6884.7	4785.81	-0.882788	0.00042482	0.00670521	9580.8	5198.9
C1orf167	0	3.80054	3.72705	3.62434	0	1.47266	2.33113	-1.02624	0.523433	NA	2.78798	1.26793
C1orf174	1173.37	904.529	785.166	1048.64	1128.92	946.922	1102.63	0.116931	0.516883	0.719829	977.927	1059.49
C1orf177	60.3864	11.4016	9.93881	19.3298	40.0325	16.1993	50.1193	0.627425	0.254036	0.487435	25.2642	35.4504
C1orf186	41.6458	8.86793	125.477	88.1922	86.0698	51.5432	114.225	0.221733	0.737351	0.862327	66.0458	83.9462
C1orf189	17.6995	12.6685	18.6353	12.0811	12.0097	16.1993	18.6491	0.0205427	0.96249	0.983805	15.2711	15.6194
C1orf194	54.1395	17.7359	26.0894	18.1217	33.0268	27.9806	9.32453	-0.332588	0.601713	0.781604	29.0216	23.444
C1orf195	1.04114	0	3.72705	4.83245	0	0	0	-3.47011	0.157045	NA	2.40016	0
C1orf198	324.837	162.156	72.0564	124.436	159.129	204.7	251.762	0.33546	0.425808	0.65208	170.871	205.197
C1orf204	84.3327	119.084	55.9058	45.9083	70.0568	88.3598	69.934	-0.0132922	0.971347	0.988142	76.3076	76.1169
C1orf21	944.318	144.421	135.416	317.734	998.81	409.4	736.638	1.15511	0.0133448	0.0750701	385.472	714.949
C1orf216	471.638	410.458	283.256	345.52	374.304	427.072	538.491	0.24582	0.214591	0.441476	377.718	446.622
C1orf220	27.0698	11.4016	49.694	32.619	29.0235	8.83598	18.6491	-0.839479	0.132238	0.327612	30.1961	18.8362
C1orf226	18.7406	60.8087	90.6916	91.8166	8.00649	44.1799	33.8014	-1.18523	0.0248164	0.112159	65.5144	28.6626
C1orf228	439.363	404.124	708.14	306.861	374.304	296.005	244.769	-0.584188	0.0779727	0.237003	464.622	305.026
C1orf233	13.5349	5.06739	4.9694	1.20811	12.0097	11.7813	3.4967	0.629502	0.562202	NA	6.19495	9.09591
C1orf234	7.28801	1.26685	1.24235	0	7.00568	0	1.16557	0.0599237	0.96272	NA	2.4493	2.72375
C1orf27	1294.14	1725.45	1488.34	1598.33	1730.4	1655.27	1882.39	0.218025	0.0977189	0.272984	1526.56	1756.02
C1orf35	74.9624	73.4771	69.5717	88.1922	128.104	108.977	82.7552	0.471937	0.0357329	0.143728	76.5508	106.612
C1orf43	3037.02	4560.65	3533.25	3936.03	2351.91	3488.74	2782.21	-0.385172	0.00015427	0.00318935	3766.74	2874.28
C1orf50	205.105	211.563	141.628	194.506	184.149	228.263	176	0.0554591	0.770116	0.884925	188.201	196.138
C1orf52	1488.84	1551.89	1449.82	1425.57	1602.3	1908.57	1841.59	0.269505	0.0190044	0.0943037	1479.03	1784.15
C1orf54	66.6332	59.5418	52.1787	74.903	45.0365	64.7972	100.239	0.140804	0.673003	0.826835	63.3142	70.0241
C1orf56	94.7441	83.6119	84.4799	77.3192	57.0463	100.141	74.5962	-0.157111	0.562705	0.754579	85.0388	77.2612
C1orf61	10.4114	13.9353	3.72705	6.04056	5.00406	4.41799	5.82783	-0.76546	0.301205	0.537539	8.52859	5.08329
C1orf74	360.236	190.027	233.562	262.16	431.35	216.481	346.173	0.318348	0.355924	0.588276	261.496	331.335
C1orf87	1.04114	0	0	0	18.0146	0	0	3.84488	0.0800663	0.241154	0.260286	6.00487
C1orf95	5.20572	3.80054	39.7552	2.41623	9.00731	1.47266	5.82783	-1.34998	0.135422	0.332006	12.7944	5.43593
C1QA	234.257	211.563	398.795	159.471	80.0649	175.247	51.2849	-1.3647	0.0196644	0.0965388	251.022	102.199
C1QB	94.7441	160.89	475.82	89.4003	13.0106	122.231	24.4769	-2.28656	0.000533124	0.00786274	205.214	53.2395
C1QBP	456.021	418.06	315.557	594.391	375.304	374.056	456.902	-0.149323	0.489573	0.701191	446.007	402.088
C1QC	27.0698	51.9407	196.291	42.2839	6.00487	27.9806	6.9934	-2.63452	0.000313449	0.00541608	79.3965	13.6596
C1QL3	55.1807	41.806	38.5129	22.9541	99.0804	54.4885	58.2783	0.800645	0.0328527	0.135259	39.6134	70.6157
C1QTNF3	102.032	36.7386	53.4211	53.157	107.087	63.3245	92.0797	0.519992	0.0174095	0.0892525	61.3372	87.497
C1QTNF3-AMACR	10.4114	1.26685	2.4847	0	5.00406	2.94533	5.82783	0.426762	0.607208	0.784643	3.54075	4.5924
C1QTNF6	219.681	136.819	190.08	106.314	270.219	161.993	95.5764	0.0867619	0.787175	0.894839	163.224	175.929
C1QTNF7	10.4114	25.3369	62.1175	44.7002	16.013	30.9259	26.808	-0.42438	0.472734	0.687876	35.6415	24.5823
C1QTNF9	11.4526	1.26685	8.69646	2.41623	3.00244	1.47266	0	-1.99543	0.0798707	NA	5.95803	1.4917
C1QTNF9B-AS1	5.20572	0	0	2.41623	8.00649	2.94533	1.16557	1.52032	0.271541	NA	1.90549	4.03913
C1R	241.546	511.806	368.978	321.358	256.208	503.651	276.239	-0.0671981	0.795694	0.899348	360.922	345.366
C1RL	5979.29	9940.95	11388.6	10163.9	5451.42	8339.69	5682.13	-0.504031	0.00814362	0.0535997	9368.18	6491.08
C1RL-AS1	1504.45	997.009	1528.09	3739.11	1903.54	1301.83	2528.11	0.00596948	0.99146	0.997497	1942.17	1911.16
C1S	55.1807	74.744	53.4211	48.3245	46.0373	29.4533	51.2849	-0.479235	0.155056	0.360618	57.9176	42.2585
C2	263.41	472.534	772.742	744.197	98.0795	134.012	221.458	-1.91347	0.000183344	0.00363478	563.221	151.183
C2-AS1	7.28801	8.86793	12.4235	15.7055	0	1.47266	2.33113	-3.20905	0.00354627	0.0302557	11.0712	1.26793
C20orf173	6.24687	2.53369	0	2.41623	5.00406	7.36332	6.9934	1.23412	0.122823	0.313846	2.7992	6.45359
C20orf194	592.411	853.855	689.505	614.929	612.497	867.399	897.486	0.209101	0.249549	0.482833	687.675	792.46
C20orf195	9.3703	3.80054	11.1812	0	17.0138	7.36332	8.15896	0.796562	0.351782	0.583931	6.088	10.8454
C20orf196	173.871	183.693	172.687	166.72	162.131	131.067	195.815	-0.0884501	0.626695	0.798216	174.243	163.005
C20orf197	706.937	837.386	657.204	1170.66	497.403	444.744	434.756	-0.864748	0.00300181	0.0269851	843.047	458.968
C20orf202	6.24687	7.60108	2.4847	6.04056	9.00731	5.89065	5.82783	0.310986	0.680206	0.831082	5.5933	6.9086
C20orf203	6.24687	6.33424	1.24235	1.20811	13.0106	14.7266	13.9868	1.92341	0.0141666	0.0780613	3.75789	13.908
C20orf24	143.678	239.434	237.289	186.049	243.197	372.584	361.325	0.720423	0.00422307	0.0339813	201.613	325.702
C20orf27	181.159	192.561	226.108	146.182	109.088	185.556	100.239	-0.526515	0.0592468	0.20073	186.502	131.628
C20orf62	6.24687	3.80054	9.93881	7.24868	4.00325	0	1.16557	-2.02617	0.0811212	NA	6.80872	1.72294
C20orf96	125.978	328.113	114.296	130.476	126.102	184.083	143.365	-0.188495	0.578111	0.766112	174.716	151.183
C21orf140	26.0286	13.9353	7.45411	16.9136	36.0292	23.5626	47.7882	1.15594	0.0023181	0.022846	16.0829	35.7933
C21orf2	206.147	186.227	186.353	165.511	277.225	217.954	228.451	0.356281	0.0756415	0.23265	186.059	241.21
C21orf33	705.896	624.556	491.971	552.107	631.512	653.862	641.061	0.115824	0.359878	0.592023	593.632	642.145
C21orf58	123.896	72.2103	108.085	95.4409	103.084	82.4691	79.2585	-0.185521	0.344477	0.57694	99.908	88.2704
C21orf59	371.689	238.167	213.684	288.739	330.268	290.115	340.345	0.208847	0.0997361	0.276126	278.07	320.243
C21orf62	15.6172	3.80054	6.21175	3.62434	43.0349	8.83598	19.8146	1.68476	0.00425225	0.0340662	7.31345	23.8952
C21orf62-AS1	38.5223	13.9353	16.1506	25.3704	67.0544	11.7813	71.0995	1.02728	0.00300637	0.0270112	23.4946	49.9784
C21orf91	2157.25	3613.05	3448.77	2300.25	1651.34	1784.87	2114.34	-0.598729	0.0027722	0.0256163	2879.83	1850.18
C21orf91-OT1	34.3578	55.7413	40.9976	24.1623	36.0292	33.8713	16.3179	-0.377288	0.469349	0.685422	38.8147	28.7395
C22orf15	7.28801	2.53369	9.93881	2.41623	12.0097	13.254	2.33113	0.717449	0.320925	0.55589	5.54418	9.19828
C22orf23	283.191	207.763	303.134	192.09	387.314	204.7	283.233	0.198377	0.374481	0.606822	246.544	291.749
C22orf24	21.864	7.60108	18.6353	9.6649	18.0146	17.672	19.8146	0.3597	0.468866	0.685041	14.4413	18.5004
C22orf29	538.272	473.801	408.733	442.169	808.656	556.667	537.326	0.431444	0.0160956	0.085229	465.744	634.216
C22orf34	91.6207	136.819	122.993	112.354	121.098	175.247	158.517	0.391955	0.305633	0.542024	115.947	151.621
C22orf39	832.916	699.3	683.293	582.31	776.63	801.129	727.313	0.13478	0.326322	0.560295	699.455	768.357
C22orf42	2.08229	1.26685	0	1.20811	0	1.47266	0	-1.3788	0.454556	NA	1.13931	0.490888
C22orf46	913.084	739.839	916.855	1150.12	1029.84	664.171	1139.92	-0.00262158	0.989476	0.996514	929.975	944.643
C2CD2	387.306	445.93	477.063	364.85	431.35	318.095	441.749	-0.115953	0.602519	0.78197	418.787	397.065
C2CD2L	1011.99	1183.24	716.836	914.541	1318.07	1239.98	930.122	0.289023	0.148505	0.351965	956.651	1162.72
C2CD3	1929.24	2358.87	3467.4	2547.91	2519.04	2063.2	2054.89	-0.202636	0.220144	0.44868	2575.86	2212.38
C2CD4D	5.20572	0	0	1.20811	4.00325	2.94533	12.8212	2.09915	0.030088	0.127358	1.60346	6.58993
C2CD5	3467.01	3045.5	3215.2	3566.35	2807.28	2867.28	2779.87	-0.23765	0.214985	0.442173	3323.52	2818.14
C2orf15	31.2343	20.2696	13.6659	6.04056	29.0235	14.7266	13.9868	0.119384	0.827268	0.917371	17.8026	19.2457
C2orf16	27.0698	21.5364	24.847	22.9541	19.0154	16.1993	26.808	-0.227763	0.604111	0.782921	24.1018	20.6742
C2orf27A	15.6172	12.6685	6.21175	22.9541	16.013	19.1446	38.4637	0.786562	0.181146	0.397422	14.3629	24.5404
C2orf40	6.24687	0	1.24235	0	10.0081	1.47266	3.4967	1.63342	0.131426	NA	1.8723	4.99249
C2orf42	329.002	335.714	321.769	334.647	273.222	217.954	256.424	-0.416064	0.0213978	0.101866	330.283	249.2
C2orf44	124.937	54.4744	70.814	90.6084	134.109	98.6684	124.716	0.503669	0.0726288	0.227086	85.2085	119.164
C2orf47	164.501	183.693	181.383	260.952	172.14	151.684	177.166	-0.238087	0.323399	0.558031	197.632	166.997
C2orf48	93.703	16.469	34.7858	59.1975	27.0219	39.7619	30.3047	-0.585076	0.285733	0.521645	51.0388	32.3628
C2orf49	1564.84	1436.6	1520.64	1708.27	1923.56	1848.19	2045.57	0.317162	0.0167982	0.0872881	1557.59	1939.11
C2orf50	2.08229	2.53369	2.4847	0	3.00244	1.47266	0	-0.247577	0.861913	NA	1.77517	1.4917
C2orf61	47.8926	15.2022	42.2399	55.5732	59.0479	29.4533	40.7948	0.096232	0.83869	0.924299	40.227	43.0987
C2orf66	23.9463	53.2076	19.8776	20.5379	8.00649	23.5626	32.6358	-0.439261	0.530785	0.730609	29.3924	21.4016
C2orf68	3285.85	3140.51	3580.46	3307.81	2645.15	2656.68	2816.01	-0.298802	0.0286938	0.123301	3328.66	2705.95
C2orf69	1555.47	1754.58	1633.69	1763.84	1541.25	1515.37	1706.39	-0.0722348	0.658039	0.817598	1676.9	1587.67
C2orf71	0	1.26685	1.24235	1.20811	0	1.47266	4.66226	1.46266	0.344108	NA	0.929328	2.04498
C2orf74	244.669	174.825	171.444	256.12	176.143	136.958	184.159	-0.35367	0.189781	0.409257	211.765	165.753
C2orf76	346.701	342.049	344.131	221.085	156.127	244.462	230.782	-0.586871	0.00383734	0.0320397	313.491	210.457
C2orf81	5.20572	6.33424	4.9694	3.62434	7.00568	7.36332	6.9934	0.465431	0.540995	0.739344	5.03342	7.1208
C2orf88	2792.35	1672.24	468.366	2573.28	1949.58	989.63	2459.34	-0.0566541	0.903132	0.956199	1876.56	1799.52
C2orf91	1.04114	0	2.4847	0	0	1.47266	0	-1.02156	0.59237	NA	0.881462	0.490888
C3	129.102	252.103	403.764	202.963	70.0568	73.6332	73.4306	-1.67778	0.000354029	0.00589642	246.983	72.3735
C3AR1	1718.93	12169.3	26202.4	6445.28	658.534	3267.84	1138.76	-2.64698	5.18166e-07	4.91659e-05	11634	1688.38
C3orf14	48.9338	106.415	24.847	36.2434	40.0325	88.3598	41.9604	0.0318595	0.94676	0.976427	54.1098	56.7842
C3orf17	1854.28	1774.85	1566.6	1783.17	1988.61	1899.74	2183.1	0.209839	0.127688	0.320657	1744.73	2023.82
C3orf18	265.492	152.022	177.656	108.73	315.256	198.81	292.557	0.603311	0.0327962	0.135094	175.975	268.874
C3orf20	41.6458	234.367	248.47	177.593	81.0657	212.063	141.033	-0.132268	0.676045	0.828532	175.519	144.721
C3orf22	5.20572	24.0701	54.6634	39.8677	18.0146	32.3986	16.3179	-0.282407	0.643907	0.807547	30.9517	22.2437
C3orf33	43.7281	21.5364	29.8164	19.3298	50.0406	36.8166	69.934	0.863771	0.00864001	0.0558023	28.6027	52.2637
C3orf35	98.9087	103.881	137.901	112.354	168.136	134.012	144.53	0.394134	0.0655219	0.213021	113.261	148.893
C3orf38	1258.74	1738.11	1739.29	1609.21	1405.14	1431.43	1486.1	-0.13107	0.482762	0.695684	1586.34	1440.89
C3orf49	32.2755	21.5364	47.2093	56.7813	25.0203	11.7813	25.6424	-0.92581	0.0245335	0.111248	39.4506	20.8147
C3orf52	30.1932	11.4016	4.9694	56.7813	29.0235	22.0899	41.9604	0.323886	0.547298	0.743638	25.8364	31.0246
C3orf58	1450.31	2490.62	1816.32	1806.13	1176.95	2509.42	1820.61	-0.0542209	0.794933	0.898866	1890.85	1835.66
C3orf62	7424.4	5178.87	4886.17	4306.92	5862.75	4937.84	3482.71	-0.205313	0.426896	0.652893	5449.09	4761.1
C3orf67	0	3.80054	0	1.20811	6.00487	2.94533	6.9934	2.41807	0.053351	NA	1.25216	5.31453
C3orf70	5.20572	11.4016	6.21175	10.873	8.00649	4.41799	16.3179	0.21743	0.724993	0.85617	8.42303	9.5808
C3orf80	2.08229	2.53369	3.72705	0	6.00487	5.89065	0	1.04528	0.523107	NA	2.08576	3.96517
C3orf84	4.16458	0	3.72705	1.20811	3.00244	1.47266	1.16557	-0.248067	0.89029	NA	2.27494	1.88022
C4BPA	147.843	519.407	9092.77	381.764	88.0714	164.938	420.769	-2.83613	0.0135201	0.075719	2535.44	224.593
C4BPB	8.32916	7.60108	9.93881	1.20811	17.0138	2.94533	6.9934	0.262433	0.729251	0.857762	6.76929	8.98417
C4orf17	2.08229	0	3.72705	1.20811	0	0	0	-3.11281	0.157061	NA	1.75436	0
C4orf19	237.381	116.55	77.0258	170.344	262.213	150.212	207.471	0.460751	0.293165	0.529363	150.325	206.632
C4orf22	0	1.26685	2.4847	0	1.00081	0	0	-0.86998	0.68942	NA	0.937887	0.333604
C4orf26	1.04114	7.60108	9.93881	2.41623	6.00487	1.47266	3.4967	-0.625256	0.509206	0.713801	5.24931	3.65808
C4orf27	219.681	258.437	253.44	218.668	147.119	188.501	266.915	-0.245814	0.18221	0.398801	237.557	200.845
C4orf29	772.529	1113.56	1067.18	991.86	986.8	1008.77	1080.48	0.0714852	0.527736	0.728932	986.282	1025.35
C4orf3	11694.1	13106.8	21257.9	10562.5	8720.07	9644.47	7790.64	-0.669817	0.000161768	0.00329048	14155.3	8718.39
C4orf32	638.222	1204.77	1269.68	683.792	563.457	746.64	810.068	-0.36878	0.123994	0.315413	949.117	706.722
C4orf33	1119.23	1301.05	1252.29	1211.74	985.8	885.071	1008.21	-0.329438	0.0430162	0.162399	1221.08	959.695
C4orf36	3.12343	16.469	7.45411	1.20811	0	2.94533	9.32453	-0.570247	0.612554	NA	7.06367	4.08995
C4orf45	15.6172	11.4016	8.69646	25.3704	21.017	17.672	6.9934	-0.0426791	0.947395	0.976668	15.2714	15.2275
C4orf46	743.377	601.752	596.328	848.095	625.507	633.245	624.743	-0.152881	0.45786	0.677768	697.388	627.832
C4orf47	5.20572	3.80054	1.24235	3.62434	4.00325	4.41799	12.8212	1.05582	0.271473	NA	3.46824	7.08082
C5	534.107	513.073	725.533	747.822	312.253	303.369	350.835	-0.974653	2.94884e-07	3.18456e-05	630.134	322.152
C5AR1	22845.8	20278.4	23605.9	17807.6	29218.7	29878.9	21236.6	0.332325	0.330413	0.564031	21134.4	26778.1
C5AR2	1414.92	1831.86	1678.42	1572.96	1793.45	1814.32	1489.59	0.0896402	0.751898	0.87237	1624.54	1699.12
C5orf15	1587.75	1866.07	1569.09	1356.71	1219.99	1437.32	1454.63	-0.214166	0.0420261	0.15952	1594.9	1370.64
C5orf17	0	0	0	6.04056	9.00731	1.47266	8.15896	2.1043	0.199777	NA	1.51014	6.21298
C5orf22	583.041	520.674	752.865	664.462	439.356	346.076	529.167	-0.539819	0.0071306	0.0489949	630.26	438.2
C5orf24	2062.51	1407.47	1424.98	1449.74	2228.81	1834.94	2002.44	0.353579	0.00942041	0.0591954	1586.17	2022.06
C5orf28	292.562	140.62	157.779	159.471	317.257	172.302	326.358	0.529436	0.00164721	0.0180016	187.608	271.972
C5orf30	1862.61	1059.08	4110.94	2721.88	365.296	459.471	214.464	-2.80961	1.20554e-05	0.000499721	2438.63	346.41
C5orf34	72.8801	34.2049	45.967	74.903	114.093	45.6526	88.583	0.511473	0.0482088	0.175285	56.9887	82.776
C5orf42	297.767	112.749	212.442	138.933	391.317	157.575	306.544	0.539086	0.0282478	0.122087	190.473	285.145
C5orf45	203.023	116.55	247.228	126.852	397.322	178.192	277.405	0.622914	0.0183094	0.0920237	173.413	284.306
C5orf47	21.864	98.8141	55.9058	107.522	8.00649	36.8166	39.6292	-1.29856	0.0594204	0.201069	71.0265	28.1508
C5orf51	1394.09	1520.22	1795.2	1876.2	885.718	784.929	983.738	-0.896044	1.3844e-05	0.000550427	1646.43	884.795
C5orf56	1095.28	2228.38	2571.67	1279.39	1399.13	1652.33	1678.41	-0.089611	0.812702	0.908877	1793.68	1576.63
C5orf58	618.44	884.259	944.187	775.608	844.685	656.808	1178.39	0.177448	0.508904	0.713643	805.624	893.293
C5orf60	3.12343	1.26685	1.24235	0	1.00081	0	0	-1.67244	0.364321	NA	1.40816	0.333604
C5orf63	332.125	98.8141	203.746	152.222	389.316	170.829	368.319	0.643698	0.00994482	0.0613582	196.727	309.488
C5orf64	0	1.26685	0	1.20811	0	0	3.4967	1.11842	0.543206	NA	0.61874	1.16557
C5orf66	3308.76	2746.52	3223.9	3735.48	2185.77	3447.5	2186.6	-0.327432	0.114726	0.30098	3253.67	2606.63
C5orf67	146.801	385.122	354.07	239.206	83.0674	269.497	113.06	-0.888732	0.00639397	0.0455779	281.3	155.208
C6orf1	234.257	355.984	268.348	263.369	249.202	377.002	202.808	-0.0336692	0.876857	0.94393	280.489	276.337
C6orf10	3.12343	0	16.1506	2.41623	5.00406	0	10.4901	-0.250956	0.81605	0.91108	5.42256	5.16472
C6orf106	4340.53	4668.33	5579.4	5153.81	4900.97	4644.78	5311.48	0.00615918	0.96089	0.98311	4935.52	4952.41
C6orf120	906.837	629.623	862.192	792.522	1117.91	811.437	1130.6	0.340779	0.0147328	0.0802309	797.793	1019.98
C6orf132	22.9052	10.1348	36.0282	27.7866	19.0154	8.83598	4.66226	-1.20482	0.0640788	0.210287	24.2137	10.8379
C6orf136	776.694	862.723	519.303	729.7	697.566	811.437	531.498	-0.10109	0.651755	0.813215	722.105	680.167
C6orf163	114.526	231.833	226.108	176.384	94.0763	167.884	158.517	-0.376056	0.301546	0.537708	187.213	140.159
C6orf165	16.6583	25.3369	12.4235	19.3298	9.00731	22.0899	12.8212	-0.405699	0.465417	0.682643	18.4371	14.6395
C6orf201	54.1395	15.2022	23.6047	32.619	92.0747	26.5079	71.0995	0.981164	0.00722075	0.0495521	31.3913	63.2274
C6orf203	155.131	110.216	110.569	166.72	158.128	116.34	149.192	0.0432849	0.828362	0.917886	135.659	141.22
C6orf222	30.1932	68.4097	120.508	27.7866	11.0089	17.672	11.6557	-2.07886	0.00136923	0.0157395	61.7244	13.4455
C6orf226	19.7817	21.5364	9.93881	14.4974	19.0154	23.5626	10.4901	0.0904086	0.85317	0.931582	16.4386	17.6894
C6orf229	386.265	260.97	323.011	306.861	234.19	268.025	233.113	-0.385125	0.0786046	0.238326	319.277	245.109
C6orf25	3508.66	2604.64	1462.25	3187	1884.53	2033.75	3037.46	-0.223808	0.618168	0.792234	2690.64	2318.58
C6orf47	1283.73	2063.69	2233.75	1699.81	1173.95	1454.99	1223.84	-0.463019	2.88398e-06	0.000175987	1820.25	1284.26
C6orf48	1251.46	941.267	929.278	839.638	1563.27	1228.2	1409.17	0.491072	0.00893909	0.0570954	990.41	1400.21
C6orf52	9.3703	6.33424	6.21175	6.04056	5.00406	2.94533	9.32453	-0.276017	0.666663	0.823793	6.98921	5.75797
C6orf58	0	0	0	1.20811	3.00244	0	2.33113	2.25057	0.152285	NA	0.302028	1.77786
C6orf62	12545.8	13106.8	21238	13419.7	11273.1	11997.8	11518.1	-0.352611	0.0983532	0.27402	15077.6	11596.4
C6orf89	6262.48	7544.07	7646.67	7120.62	6764.49	7233.72	6164.68	-0.0766788	0.510765	0.715064	7143.46	6720.96
C6orf99	3.12343	1.26685	6.21175	3.62434	5.00406	2.94533	6.9934	0.48732	0.587078	NA	3.55659	4.98093
C7	3.12343	1.26685	2.4847	1.20811	1.00081	1.47266	1.16557	-0.717615	0.643097	NA	2.02077	1.21301
C7orf13	26.0286	11.4016	16.1506	19.3298	18.0146	4.41799	12.8212	-0.769477	0.247753	0.480752	18.2276	11.7513
C7orf25	297.767	396.523	711.867	358.809	186.151	260.661	248.266	-0.899095	0.0249381	0.112528	441.242	231.693
C7orf26	699.649	784.178	537.938	584.726	671.545	765.785	569.962	0.037092	0.839271	0.924482	651.623	669.097
C7orf31	236.34	349.65	327.981	356.393	152.123	201.755	234.279	-0.69346	0.000592971	0.00845474	317.591	196.052
C7orf34	192.612	168.491	115.539	349.145	60.0487	157.575	97.9075	-1.06216	0.0136926	0.0762184	206.446	105.177
C7orf43	1905.29	1508.81	1877.19	1125.96	2060.67	1802.54	1185.38	0.0652794	0.812043	0.908574	1604.32	1682.86
C7orf49	1616.9	3279.87	4062.49	3025.11	1633.32	1949.81	1505.91	-0.737234	3.52022e-05	0.00108573	2996.09	1696.35
C7orf50	52.0572	50.6739	42.2399	28.9947	50.0406	38.2892	17.4835	-0.323109	0.50426	0.710753	43.4914	35.2711
C7orf55	7.28801	0	3.72705	6.04056	3.00244	1.47266	2.33113	-0.87471	0.345456	NA	4.26391	2.26874
C7orf57	9.3703	13.9353	8.69646	9.6649	11.0089	14.7266	4.66226	-0.0632112	0.907523	0.95801	10.4167	10.1326
C7orf60	1839.7	2304.39	2622.6	2013.92	1790.45	2035.22	1884.72	-0.183589	0.232664	0.464131	2195.16	1903.46
C7orf61	121.814	162.156	206.23	89.4003	83.0674	113.395	90.9141	-0.564275	0.0822427	0.245106	144.9	95.7922
C7orf71	26.0286	24.0701	40.9976	16.9136	18.0146	39.7619	30.3047	0.0911651	0.824326	0.916259	27.0025	29.3604
C7orf73	3068.25	3234.26	3184.15	2730.33	1962.59	2912.93	2824.17	-0.257388	0.0528507	0.186261	3054.25	2566.56
C8B	0	1.26685	0	1.20811	0	0	0	-1.35872	0.746178	0.868496	0.61874	0
C8G	3.12343	3.80054	2.4847	4.83245	1.00081	0	1.16557	-2.22563	0.0751408	NA	3.56028	0.722126
C8orf31	17.6995	50.6739	57.1481	30.2028	28.0227	10.3086	19.8146	-1.28034	0.0857223	0.251666	38.9311	19.382
C8orf33	509.12	364.852	436.065	577.478	451.366	521.323	695.843	0.236513	0.178466	0.394039	471.879	556.177
C8orf37	63.5098	46.8733	45.967	53.157	75.0609	39.7619	103.735	0.450827	0.0633729	0.208889	52.3768	72.8527
C8orf37-AS1	8.32916	5.06739	2.4847	9.6649	7.00568	7.36332	4.66226	0.0158071	0.984781	0.994098	6.38654	6.34375
C8orf44	190.529	212.83	187.595	199.339	210.17	189.974	257.59	0.150353	0.540182	0.738678	197.573	219.245
C8orf44-SGK3	1.04114	1.26685	2.4847	3.62434	1.00081	0	0	-2.2427	0.16823	NA	2.10426	0.333604
C8orf46	65.5921	24.0701	49.694	26.5785	69.056	33.8713	54.7816	0.344249	0.52409	0.725226	41.4837	52.5696
C8orf58	604.905	497.871	496.94	484.453	573.465	681.843	572.293	0.219633	0.268451	0.502523	521.042	609.2
C8orf59	913.084	846.254	848.526	1000.32	821.666	948.395	1063	0.0631132	0.674261	0.827695	902.045	944.352
C8orf76	105.156	84.8788	54.6634	57.9894	41.0333	111.922	55.9472	-0.158689	0.637347	0.804217	75.6718	69.6343
C8orf82	37.4812	43.0728	31.0588	38.6596	22.0179	36.8166	27.9736	-0.388315	0.356267	0.588471	37.5681	28.936
C8orf88	9.3703	19.0027	22.3623	31.4109	16.013	51.5432	30.3047	0.641094	0.110224	0.293415	20.5366	32.6203
C9	1.04114	2.53369	0	0	2.00162	0	1.16557	0.0794707	0.964381	NA	0.89371	1.05573
C9orf106	8.32916	21.5364	57.1481	22.9541	20.0162	38.2892	13.9868	-0.0652299	0.881763	0.945835	27.492	24.0974
C9orf114	439.363	362.318	342.889	324.982	542.44	365.22	358.994	0.18469	0.352251	0.584495	367.388	422.218
C9orf116	1.04114	1.26685	3.72705	1.20811	0	1.47266	1.16557	-1.06336	0.493536	NA	1.81079	0.87941
C9orf117	9.3703	7.60108	3.72705	9.6649	16.013	10.3086	15.1524	0.862608	0.0767628	0.234698	7.59083	13.8247
C9orf131	171.789	192.561	355.312	250.079	311.252	300.423	290.226	0.35573	0.0682548	0.218104	242.435	300.634
C9orf135	0	0	0	0	0	0	1.16557	0.66365	0.857156	NA	0	0.388522
C9orf139	250.916	323.046	375.19	253.704	229.186	268.025	145.696	-0.474185	0.0847761	0.249778	300.714	214.302
C9orf142	105.156	100.081	69.5717	48.3245	170.138	97.1958	80.424	0.495253	0.287216	0.523141	80.7832	115.919
C9orf152	14.576	29.1375	8.69646	22.9541	1.00081	2.94533	11.6557	-1.88036	0.0230594	0.106974	18.841	5.2006
C9orf153	7.28801	1.26685	6.21175	4.83245	4.00325	0	2.33113	-1.16862	0.177652	0.393299	4.89977	2.11146
C9orf156	659.044	722.103	498.183	885.547	1087.88	989.63	869.512	0.503378	0.0579187	0.198135	691.219	982.341
C9orf16	68.7155	67.1429	48.4517	50.7407	71.0576	76.5785	65.2717	0.27629	0.447301	0.668651	58.7627	70.9693
C9orf163	3.12343	0	1.24235	0	0	0	1.16557	-1.15944	0.600911	NA	1.09145	0.388522
C9orf171	2.08229	8.86793	0	0	1.00081	2.94533	1.16557	-0.703447	0.589659	NA	2.73755	1.7039
C9orf173-AS1	2.08229	0	4.9694	0	4.00325	2.94533	0	0.394966	0.769495	NA	1.76292	2.31619
C9orf24	12.4937	6.33424	3.72705	3.62434	12.0097	1.47266	10.4901	0.212585	0.77966	0.890118	6.54484	7.99083
C9orf3	115.567	141.887	109.327	106.314	113.092	132.54	95.5764	-0.0612688	0.772653	0.886157	118.274	113.736
C9orf40	201.982	253.369	196.291	221.085	93.0755	101.614	122.384	-1.04556	8.47885e-08	1.25388e-05	218.182	105.691
C9orf41	230.093	184.96	190.08	260.952	294.239	198.81	298.385	0.273037	0.125897	0.31823	216.521	263.811
C9orf41-AS1	13.5349	1.26685	13.6659	13.2892	27.0219	16.1993	26.808	1.15108	0.0035202	0.0300958	10.4392	23.3431
C9orf43	11.4526	6.33424	16.1506	12.0811	6.00487	4.41799	12.8212	-0.582999	0.295777	0.531666	11.5046	7.74803
C9orf47	45.8104	140.62	64.6022	86.9841	59.0479	64.7972	116.557	0.00423449	0.993399	0.998205	84.5042	80.1339
C9orf64	211.352	169.758	203.746	239.206	87.0706	86.8871	131.709	-1.02437	0.00242088	0.0234585	206.015	101.889
[truncated: 16,995 more rows]

## Sheet: Significantly regulated genes
Gene	ID2_1st	ID3_1st	ID4_1st	ID5_1st	ID2_2nd	ID3_2nd	ID5_2nd	log2FoldChange	pvalue	padj	meanVaccine	meanVaccine_2nd
IFI27	899.549	9847.2	6733.54	3975.9	17.0138	32.3986	13.9868	-7.79407	4.66886e-11	4.49136e-08	5364.05	21.1331
MAOA	1108.82	1090.76	7132.34	791.314	36.0292	132.54	2.33113	-5.59218	4.3521e-06	0.000234229	2530.81	56.9667
SIGLEC1	901.631	12106	14566.6	9890.82	310.252	203.228	179.497	-5.14817	4.77572e-07	4.61137e-05	9366.25	230.992
ALOX15B	279.027	146.954	357.797	532.778	30.0244	4.41799	13.9868	-4.47153	2.58977e-09	8.33549e-07	329.139	16.143
OLAH	1968.8	2822.54	12081.9	2881.35	170.138	403.51	101.404	-4.36576	1.06151e-06	8.10453e-05	4938.64	225.017
IFI44L	7504.57	67935.9	112101	68991.7	5682.61	1223.78	2747.24	-4.32078	4.85595e-06	0.000255482	64133.3	3217.88
RSAD2	6511.32	40083	62603.3	28124.9	2708.2	434.436	1500.08	-4.23367	1.04985e-05	0.000447617	34330.6	1547.57
NRIR	470.597	2194.18	3385.41	2608.32	159.129	57.4339	125.881	-4.21033	1.46277e-06	0.000102613	2164.62	114.148
MYO1B	314.426	195.094	928.036	471.164	33.0268	17.672	29.1391	-4.15178	5.56462e-06	0.000286343	477.18	26.6126
FBXO39	38.5223	125.418	248.47	151.014	15.0122	1.47266	12.8212	-4.13151	1.07036e-05	0.000454855	140.856	9.76869
LY6E	5872.05	19651.3	27192.6	11744.1	1754.42	485.979	459.233	-4.08684	1.67782e-06	0.000113339	16115	899.878
CXCL11	4.16458	58.275	57.1481	21.746	2.00162	1.47266	2.33113	-4.0791	0.000861606	0.0110928	35.3334	1.93514
PLVAP	29.152	49.407	118.023	54.3651	8.00649	1.47266	2.33113	-4.07385	0.000206993	0.00396013	62.7369	3.93676
SMTNL1	1560.68	4480.84	13086.9	6050.23	401.325	248.88	508.187	-3.94756	4.03622e-07	4.14091e-05	6294.67	386.131
LINC00487	39.5635	566.281	382.644	186.049	9.00731	13.254	25.6424	-3.89738	0.000473326	0.00722758	293.634	15.9679
NWD1	43.7281	19.0027	37.2705	10.873	1.00081	2.94533	2.33113	-3.78106	7.49562e-05	0.00184746	27.7186	2.09242
OAS1	5795.01	22865.3	33502.5	12752.8	1425.16	1125.11	1014.04	-3.76459	7.42102e-11	5.07567e-08	18728.9	1188.1
CXCL10	18.7406	520.674	439.792	56.7813	14.0114	5.89065	27.9736	-3.61921	0.000620773	0.00874677	258.997	15.9585
IFI44	9973.12	59199.8	82620.1	50525.7	5827.73	2337.12	3398.79	-3.61027	3.42382e-06	0.000198672	50579.7	3854.54
TIMM10	1406.59	3417.95	8357.29	2934.51	255.207	219.427	448.743	-3.57583	1.01988e-08	2.49872e-06	4029.08	307.792
OTOF	40.6046	230.566	839.829	229.541	52.0422	14.7266	11.6557	-3.5056	0.00342969	0.0296307	335.135	26.1415
LOC284648	13.5349	64.6092	44.7246	32.619	4.00325	4.41799	1.16557	-3.46855	3.23658e-05	0.0010217	38.8719	3.1956
CMPK2	2343.62	12595	18737.1	9876.32	1215.99	374.056	917.3	-3.46287	6.87083e-06	0.000328818	10888	835.781
IFIT1	6282.27	35955.7	57318.3	29012.8	3904.17	974.903	1976.8	-3.44165	0.00013794	0.00295598	32142.3	2285.29
SCN5A	113.485	26.6038	233.562	111.146	9.00731	19.1446	5.82783	-3.43855	2.02809e-05	0.000730361	121.199	11.3266
JUP	248.834	399.057	952.883	511.032	65.0528	20.6173	72.2651	-3.43174	6.54363e-06	0.000319684	527.951	52.645
EPSTI1	18773.9	35034.7	41744.2	28325.4	4333.51	1266.49	3229.78	-3.43006	1.20509e-10	7.06486e-08	30969.6	2943.26
OAS3	7727.37	36942.5	61488.9	32685.5	5108.14	1590.48	2367.26	-3.37348	3.07235e-05	0.000996692	34711.1	3021.96
NETO1	71.839	16.469	832.375	62.8219	22.0179	11.7813	41.9604	-3.37077	0.0031481	0.027933	245.876	25.2532
NR5A2	24.9875	11.4016	8.69646	70.0705	5.00406	1.47266	2.33113	-3.35642	0.00094293	0.011888	28.789	2.93595
OAS2	7937.68	31530.6	46719.8	24488.4	3116.53	1681.78	2571.24	-3.3478	1.61274e-08	3.464e-06	27669.1	2456.52
SPATS2L	371.689	1972.48	3773.02	1512.56	194.157	166.411	142.199	-3.34217	1.14148e-07	1.58791e-05	1907.44	167.589
SERPING1	4795.51	9315.13	14053.5	5321.74	842.683	465.362	947.605	-3.31126	1.29243e-05	0.000523833	8371.46	751.883
LOC613266	32.2755	7.60108	298.164	18.1217	7.00568	5.89065	13.9868	-3.3013	0.000617666	0.00871798	89.0406	8.96104
OR2B6	92.6619	391.456	85.7222	192.09	21.017	27.9806	9.32453	-3.2616	1.31403e-05	0.000530403	190.482	19.4407
USP18	174.912	1021.08	1383.98	733.324	132.107	47.1252	76.9273	-3.21248	9.98304e-05	0.00228552	828.324	85.3866
FAM225A	31.2343	131.752	147.84	118.395	9.00731	8.83598	11.6557	-3.14764	3.41805e-05	0.00106466	107.305	9.83298
RNASE1	92.6619	120.35	2248.66	1011.19	22.0179	53.0159	221.458	-3.11313	0.0021049	0.0212628	868.214	98.8304
SLCO2B1	9.3703	16.469	150.324	21.746	2.00162	19.1446	1.16557	-3.11226	0.000441707	0.00686612	49.4775	7.43727
RTP4	405.005	1548.09	2157.96	1047.43	164.133	95.7231	117.722	-3.10753	1.76835e-07	2.18252e-05	1289.62	125.859
GBP1P1	165.542	1174.37	1851.1	457.875	77.0625	39.7619	117.722	-3.01933	0.0026301	0.0247837	912.222	78.1822
ADAMTS2	1482.59	1659.57	2102.06	2436.76	223.181	555.194	25.6424	-2.99755	0.000871921	0.011208	1920.25	268.006
ZNF608	1302.47	7070.27	15242.4	4048.39	356.289	1938.02	308.875	-2.97892	7.20483e-10	2.88457e-07	6915.88	867.73
COL9A2	1804.3	885.526	2803.99	3979.52	472.383	189.974	284.398	-2.97232	3.29097e-11	3.85866e-08	2368.33	315.585
AZU1	142.637	96.2804	245.985	21.746	12.0097	39.7619	10.4901	-2.95898	0.00106269	0.0129215	126.662	20.7539
EPCAM	160.336	115.283	267.105	213.836	24.0195	42.7072	9.32453	-2.95386	0.000154823	0.00319675	189.14	25.3504
TRIM6	90.5796	159.623	554.089	373.307	37.03	35.3439	34.967	-2.9345	1.2781e-06	9.32448e-05	294.399	35.7803
XAF1	9026.72	34216.3	45128.4	35663.5	4830.92	2344.48	4352.22	-2.90716	1.12468e-06	8.39164e-05	31008.7	3842.54
HIST1H2BO	93.703	879.192	175.171	345.52	39.0317	66.2698	37.2981	-2.89104	0.000390527	0.00630955	373.397	47.5332
CA12	65.5921	126.685	181.383	182.425	10.0081	39.7619	11.6557	-2.88156	9.21327e-07	7.27095e-05	139.021	20.4752
SAP30	2018.78	889.327	2949.34	3965.03	394.32	402.037	216.795	-2.86511	4.06812e-07	4.14771e-05	2455.62	337.717
CTSG	870.397	333.181	1092.03	93.0247	95.0771	144.321	38.4637	-2.85843	0.00579018	0.0424914	597.157	92.6206
DDX60	3625.26	13764.3	23015.8	13730.2	2169.76	1135.42	1856.75	-2.84009	2.1444e-07	2.4789e-05	13533.9	1720.64
IFI6	2696.56	10698.5	13166.4	6550.39	1665.35	608.21	838.042	-2.82754	4.98703e-06	0.00026154	8277.98	1037.2
ETV7	753.789	1333.99	3899.74	914.541	514.417	53.0159	278.57	-2.82077	0.00378167	0.0316392	1725.51	282.001
IFIT3	16380.3	75225.4	131237	63515.3	10345.4	4968.77	8193.93	-2.81635	0.00014429	0.00304046	71589.5	7836.03
FN1	103.073	510.539	2443.7	315.317	88.0714	86.8871	122.384	-2.81045	0.000666371	0.00916889	843.159	99.1143
C5orf30	1862.61	1059.08	4110.94	2721.88	365.296	459.471	214.464	-2.80961	1.20554e-05	0.000499721	2438.63	346.41
CCNA1	26.0286	354.717	641.053	445.794	11.0089	114.868	37.2981	-2.80425	0.000197456	0.00382276	366.898	54.3916
GPNMB	12.4937	21.5364	557.816	28.9947	9.00731	29.4533	20.9802	-2.76855	0.0021565	0.0216438	155.21	19.8136
DAAM2	3959.47	1695.04	8088.95	7148.4	1147.93	1001.41	179.497	-2.74966	0.00274104	0.0254363	5222.97	776.28
ZDHHC19	73.9213	470	1070.91	67.6543	30.0244	95.7231	19.8146	-2.74506	0.000585363	0.00839925	420.621	48.5207
IL18R1	13779.5	6378.57	39537.8	45386.4	2824.29	5395.84	3621.41	-2.74066	9.52119e-06	0.000414166	26270.6	3947.18
MX1	9715.96	30391.7	49654.3	27342	7052.72	1918.88	3155.19	-2.72942	2.63977e-06	0.00016476	29276	4042.26
MPO	2322.79	1263.05	4719.69	453.042	257.209	692.152	242.438	-2.68791	0.00406026	0.0332581	2189.64	397.266
GUCY2D	42.6869	31.6712	50.9364	68.8624	6.00487	7.36332	9.32453	-2.68549	0.000190036	0.00372249	48.5392	7.56424
LOC344887	15.6172	255.903	361.524	123.227	7.00568	41.2346	19.8146	-2.65233	4.10024e-05	0.00119576	189.068	22.685
C3AR1	1718.93	12169.3	26202.4	6445.28	658.534	3267.84	1138.76	-2.64698	5.18166e-07	4.91659e-05	11634	1688.38
C1QC	27.0698	51.9407	196.291	42.2839	6.00487	27.9806	6.9934	-2.63452	0.000313449	0.00541608	79.3965	13.6596
HERC5	4483.17	18261.6	22031.9	11925.3	2758.24	1329.81	2063.05	-2.59801	9.41223e-06	0.000414166	14175.5	2050.37
ACBD7	58.3041	64.6092	310.588	147.39	22.0179	27.9806	19.8146	-2.58856	0.000233707	0.00432992	145.223	23.271
SFRP1	136.39	32.938	101.873	80.9435	27.0219	5.89065	13.9868	-2.55634	0.00158275	0.0175073	88.0361	15.6331
RNASE3	917.248	578.949	1771.59	164.303	97.0787	393.201	95.5764	-2.54887	0.00401468	0.0330662	858.023	195.285
MT2A	1025.53	823.451	1380.25	570.229	256.208	185.556	57.1127	-2.5425	2.23167e-05	0.000787805	949.865	166.292
MIR503HG	5.20572	21.5364	34.7858	12.0811	2.00162	1.47266	4.66226	-2.49065	0.00194498	0.020222	18.4023	2.71218
FOXC1	32.2755	127.952	223.623	45.9083	7.00568	47.1252	6.9934	-2.47322	5.90199e-05	0.00156766	107.44	20.3748
LINC01093	153.048	841.186	1502	297.196	45.0365	273.915	59.4439	-2.45702	3.97675e-05	0.00118044	698.358	126.132
RNF144A-AS1	65.5921	217.898	371.463	167.928	57.0463	8.83598	43.1259	-2.44841	0.00243665	0.0235427	205.72	36.3361
ZBTB16	1728.3	220.431	554.089	2698.92	288.234	181.138	159.683	-2.44406	0.00326425	0.0286692	1300.44	209.685
TMIGD3	553.889	421.86	1411.31	1649.07	230.187	203.228	117.722	-2.4255	0.00296995	0.0268161	1009.03	183.712
BATF2	520.572	2185.31	3287.26	1145.29	247.2	150.212	355.498	-2.41877	9.07911e-05	0.00214437	1784.61	250.97
TIMP3	13.5349	131.752	60.8752	27.7866	6.00487	13.254	9.32453	-2.41215	0.00354982	0.0302703	58.4872	9.52779
AMPH	419.581	244.501	559.058	427.672	62.0503	111.922	62.9406	-2.4066	7.30905e-05	0.00181236	412.703	78.9711
HESX1	19.7817	76.0108	105.6	62.8219	11.0089	10.3086	13.9868	-2.37071	0.00268088	0.0250866	66.0536	11.7681
ZNF442	46.8515	29.1375	52.1787	56.7813	14.0114	4.41799	9.32453	-2.36468	4.13922e-07	4.16843e-05	46.2373	9.25129
RPH3A	2496.66	9232.78	3012.7	840.846	513.416	1961.59	162.014	-2.34882	0.00576867	0.0424441	3895.75	879.006
FAP	16.6583	53.2076	79.5105	62.8219	5.00406	5.89065	15.1524	-2.3436	0.00268919	0.0251384	53.0496	8.68236
LINC01118	49.9749	26.6038	83.2375	45.9083	13.0106	8.83598	8.15896	-2.33421	0.00148625	0.0167231	51.4311	10.0018
SEPT4	189.488	622.022	1321.86	512.24	126.102	54.4885	150.358	-2.33373	0.000288515	0.00508151	661.403	110.316
HPN	8.32916	43.0728	79.5105	37.4515	5.00406	13.254	4.66226	-2.3057	5.49997e-05	0.00148735	42.091	7.6401
GLDN	36.4401	82.3451	188.837	22.9541	11.0089	33.8713	5.82783	-2.28753	0.001753	0.0187463	82.6441	16.9027
C1QB	94.7441	160.89	475.82	89.4003	13.0106	122.231	24.4769	-2.28656	0.000533124	0.00786274	205.214	53.2395
PCDH9	35.3989	39.2723	326.738	44.7002	21.017	11.7813	32.6358	-2.28467	0.00484623	0.0372778	111.527	21.8114
LOC339874	289.438	197.628	267.105	287.531	59.0479	54.4885	48.9538	-2.26426	9.21192e-09	2.32636e-06	260.426	54.1634
CD163L1	128.061	157.089	279.529	151.014	31.0252	54.4885	27.9736	-2.25703	1.47314e-05	0.000573023	178.923	37.8291
HMCN1	29.152	44.3396	26.0894	91.8166	7.00568	14.7266	9.32453	-2.2405	5.99382e-05	0.00157927	47.8494	10.3523
CD163	18969.7	22172.4	49372.3	39250.4	3555.88	12778.3	6481.71	-2.21529	3.18851e-06	0.000188454	32441.2	7605.3
RNASE2	2191.61	4637.93	9782.27	2574.49	442.359	2228.14	743.631	-2.2069	1.90239e-05	0.000706301	4796.57	1138.04
MYBL2	290.479	202.696	273.317	1397.79	64.0519	106.032	174.835	-2.19248	0.000354971	0.00589762	541.07	114.973
SAMD9L	10616.5	19607	47442.9	29066	6906.6	1758.36	7961.98	-2.18763	2.36956e-05	0.000824076	26683.1	5542.31
ARHGEF37	6.24687	17.7359	48.4517	30.2028	6.00487	4.41799	4.66226	-2.1869	0.00362825	0.0307316	25.6593	5.02837
AGRN	30.1932	143.154	136.659	44.7002	37.03	5.89065	10.4901	-2.18663	0.00513598	0.0389598	88.6764	17.8036
FBXO6	606.987	2572.97	3669.9	1384.5	312.253	521.323	350.835	-2.18209	2.66472e-06	0.000165317	2058.59	394.804
FAM212A	8.32916	38.0054	9.93881	37.4515	4.00325	2.94533	9.32453	-2.17584	0.00711322	0.0489164	23.4312	5.42437
ZNF684	387.306	406.658	805.043	756.278	132.107	139.903	116.557	-2.17159	3.95639e-09	1.13937e-06	588.821	129.522
VSIG4	1405.54	2708.52	3560.58	1495.64	273.222	1396.08	177.166	-2.12335	0.00662605	0.0467411	2292.57	615.491
DISC1-IT1	6.24687	20.2696	34.7858	35.0353	3.00244	8.83598	4.66226	-2.11995	0.00196571	0.020333	24.0844	5.50023
WDR78	44.7692	35.4717	32.3011	39.8677	10.0081	8.83598	8.15896	-2.09647	0.00020456	0.00392517	38.1024	9.00102
C6orf222	30.1932	68.4097	120.508	27.7866	11.0089	17.672	11.6557	-2.07886	0.00136923	0.0157395	61.7244	13.4455
CES1	867.273	5434.77	3673.63	4608.95	264.214	1368.1	905.645	-2.07319	7.88935e-05	0.00191008	3646.16	845.988
DLL4	20.8229	25.3369	38.5129	33.8272	8.00649	7.36332	5.82783	-2.07056	0.000211968	0.00401321	29.625	7.06588
LOC100129940	38.5223	127.952	228.593	181.217	24.0195	53.0159	22.1458	-2.06205	2.19513e-05	0.000778	144.071	33.0604
C16orf95	12.4937	32.938	11.1812	26.5785	3.00244	2.94533	9.32453	-2.05863	0.00261526	0.0247156	20.7978	5.09076
TP73	20.8229	15.2022	17.3929	64.03	11.0089	4.41799	8.15896	-2.05161	0.00263488	0.0248144	29.362	7.86196
OASL	3355.61	9089.63	12316.7	6744.89	2088.69	1696.51	1183.05	-2.02993	3.71947e-05	0.00112234	7876.7	1656.08
EPHB2	105.156	282.507	459.67	327.399	51.0414	55.9612	86.2519	-2.02365	0.00102872	0.012668	293.683	64.4182
SCRG1	144.719	93.7467	166.475	207.795	32.026	53.0159	31.4703	-1.98821	0.000889177	0.0113477	153.184	38.8374
YPEL4	32.2755	89.9461	132.932	57.9894	16.013	11.7813	25.6424	-1.98613	1.21485e-05	0.000500423	78.2856	17.8122
TRIM22	56892.3	113593	169021	120415	24578.9	28201.5	28963.1	-1.98042	3.47598e-12	5.70582e-09	114980	27247.9
TROAP	113.485	46.8733	151.567	170.344	19.0154	44.1799	33.8014	-1.96843	4.48597e-05	0.001274	120.567	32.3322
PPAP2B	60.3864	107.682	236.047	159.471	18.0146	89.8324	18.6491	-1.9635	2.90941e-05	0.000957072	140.896	42.1654
CACNA1A	165.542	316.712	587.632	215.044	64.0519	116.34	55.9472	-1.95662	5.55315e-06	0.000286343	321.232	78.7798
BUB1	219.681	212.83	203.746	1309.59	60.0487	122.231	195.815	-1.95508	0.00340371	0.0294527	486.463	126.032
IFIT2	15291.3	45098.5	96714.5	46317.8	12172.9	7238.14	12797.9	-1.94029	0.00040139	0.00642184	50855.5	10736.3
SLC5A9	588.247	658.76	1341.74	828.765	261.212	235.626	171.338	-1.92451	8.84876e-06	0.00039798	854.378	222.725
UBQLNL	124.937	201.429	376.432	163.095	69.056	39.7619	57.1127	-1.92213	2.85817e-05	0.000947235	216.473	55.3102
C2	263.41	472.534	772.742	744.197	98.0795	134.012	221.458	-1.91347	0.000183344	0.00363478	563.221	151.183
BAMBI	58.3041	63.3424	258.409	149.806	25.0203	8.83598	64.1061	-1.91315	0.00537692	0.040174	132.465	32.6541
ANKRD22	649.674	3563.64	4677.45	1870.16	269.218	848.254	635.233	-1.90579	2.44252e-07	2.7651e-05	2690.23	584.235
LINC00482	257.163	481.402	446.004	501.367	46.0373	182.61	127.047	-1.90006	2.64731e-05	0.000895992	421.484	118.565
SLC1A3	150.966	173.558	498.183	533.986	28.0227	200.282	88.583	-1.89249	0.0019101	0.0199223	339.173	105.629
EFNA1	35.3989	40.5391	57.1481	14.4974	4.00325	14.7266	11.6557	-1.8893	0.000899241	0.0114338	36.8959	10.1285
NAV2	94.7441	39.2723	111.812	10.873	18.0146	14.7266	19.8146	-1.8642	0.00365837	0.0308751	64.1752	17.5186
OLFML2A	51.0161	38.0054	86.9646	16.9136	20.0162	10.3086	9.32453	-1.85266	0.00314547	0.0279248	48.2249	13.2165
THBS1	3868.89	21702.4	5081.22	18694.3	1478.2	3415.11	4636.62	-1.84284	0.00344229	0.0296615	12336.7	3176.64
FKBP5	57417	23687.5	76065.4	93545.4	12054.8	29850.9	13937.8	-1.83512	0.00256839	0.0244548	62678.8	18614.5
DHX58	437.281	1259.25	2092.12	943.536	401.325	273.915	245.934	-1.82911	0.00032083	0.00548996	1183.05	307.058
KLHDC7B	154.089	159.623	197.534	204.171	68.0552	39.7619	43.1259	-1.81968	0.000673631	0.00925327	178.854	50.3143
E2F8	128.061	79.8114	139.143	269.409	25.0203	57.4339	58.2783	-1.81136	0.00517201	0.0390481	154.106	46.9108
HCG9	44.7692	136.819	228.593	254.912	24.0195	61.8518	46.6226	-1.8095	0.00253144	0.0242013	166.273	44.1647
KIF18B	90.5796	35.4717	58.3905	171.552	18.0146	27.9806	31.4703	-1.79724	0.00172682	0.0185752	88.9984	25.8218
GBP6	400.841	635.957	1595.18	715.203	176.143	167.884	283.233	-1.78891	0.000741675	0.00985797	836.795	209.086
HIST1H2BE	21.864	40.5391	75.7834	38.6596	6.00487	13.254	17.4835	-1.78673	0.000519591	0.00771165	44.2115	12.2474
CARD17	326.919	894.394	2316.98	1090.93	148.12	378.474	352.001	-1.77089	0.000541187	0.00794595	1157.31	292.865
ECRP	83.2916	159.623	478.305	109.938	32.026	103.086	45.4571	-1.76941	0.00271023	0.0252775	207.789	60.1898
NEXN	442.486	1391	559.058	1465.44	315.256	157.575	384.637	-1.75532	0.00353547	0.030195	964.496	285.822
PLSCR1	5277.56	24721.3	31302.3	20672	3573.9	6946.55	5190.26	-1.75359	9.53729e-06	0.000414166	20493.3	5236.91
TCN2	530.984	2210.65	2520.73	1768.68	210.17	1007.3	420.769	-1.74792	0.000200396	0.00385639	1757.76	546.08
BIRC5	175.953	121.617	96.9034	337.063	34.0276	76.5785	59.4439	-1.7431	0.00322499	0.0283699	182.884	56.6833
IFIH1	2548.72	10180.4	14474.6	8424.17	2447.99	1784.87	2722.76	-1.73245	0.00196995	0.0203632	8906.98	2318.54
HERC6	1227.51	3221.59	3672.39	3271.57	1103.9	581.702	824.055	-1.73175	0.000204688	0.00392517	2848.26	836.551
MT1X	443.528	592.884	842.314	733.324	132.107	307.787	151.524	-1.72918	0.00076751	0.0101246	653.013	197.139
HIST1H4D	72.8801	74.744	131.689	88.1922	19.0154	36.8166	27.9736	-1.72844	0.000183803	0.00363856	91.8764	27.9352
LINC00659	24.9875	26.6038	58.3905	53.157	20.0162	8.83598	8.15896	-1.72054	0.000785061	0.0103177	40.7847	12.3371
IFIT5	1580.46	4843.16	7856.63	5053.53	1595.29	983.739	1230.84	-1.71765	0.000159701	0.0032628	4833.44	1269.96
MT1F	121.814	168.491	236.047	187.257	34.0276	104.559	32.6358	-1.71392	0.00709252	0.048848	178.402	57.0742
HLA-DOB	1542.98	1788.79	5650.21	964.074	885.718	547.831	813.565	-1.704	0.00183755	0.0193603	2486.51	749.038
EXO1	105.156	67.1429	54.6634	266.993	25.0203	35.3439	53.616	-1.7028	0.0027456	0.0254363	123.489	37.9934
HMGB2	35228.2	30619.7	41428.7	37277.5	9702.87	17962.1	7397.85	-1.69983	2.37407e-06	0.000151048	36138.5	11687.6
KCNE1	1630.43	2097.9	4420.28	3745.15	742.602	1282.69	713.326	-1.6996	0.000139179	0.00296705	2973.44	912.873
HIST1H4H	738.171	1676.04	1412.55	1730.02	447.363	427.072	381.14	-1.69432	0.00059129	0.00845472	1389.2	418.525
HIST1H2BF	167.624	187.493	531.726	246.455	56.0455	85.4145	108.398	-1.68184	0.00104314	0.012757	283.325	83.2858
LHFPL2	1819.92	4070.38	8093.92	3714.95	960.779	1674.42	1148.08	-1.68092	1.72609e-06	0.000115648	4424.79	1261.09
PTRF	19.7817	30.4043	37.2705	19.3298	9.00731	8.83598	5.82783	-1.67939	0.000283157	0.00501405	26.6966	7.89037
C3	129.102	252.103	403.764	202.963	70.0568	73.6332	73.4306	-1.67778	0.000354029	0.00589642	246.983	72.3735
CDC20	113.485	116.55	100.63	338.272	35.0284	86.8871	47.7882	-1.67698	0.00184229	0.019373	167.234	56.5679
INHBB	374.812	406.658	323.011	495.326	73.0593	229.735	108.398	-1.67303	0.00015119	0.00314947	399.952	137.064
TMEM119	1032.82	1360.59	1124.33	676.543	346.281	452.108	203.974	-1.67282	6.58795e-08	1.03982e-05	1048.57	334.121
TPST1	6782.01	3817.01	8710.12	9312.13	2383.93	3691.97	1049.01	-1.67027	0.00517628	0.0390481	7155.32	2374.97
TRIP13	84.3327	48.1402	39.7552	209.003	12.0097	38.2892	37.2981	-1.66783	0.00432675	0.0344107	95.3079	29.199
SLPI	4145.84	6211.35	13156.5	747.822	1136.92	4594.71	815.896	-1.66236	0.00667916	0.0470537	6065.38	2182.51
GRB10	5745.03	4765.88	8036.77	4744.26	1190.97	3699.33	1266.97	-1.64498	0.0013979	0.0159795	5822.98	2052.42
TNNT3	462.268	1071.75	1326.83	664.462	234.19	315.15	266.915	-1.64423	0.00246346	0.0237449	881.328	272.085
ARMC12	210.311	135.553	331.708	253.704	56.0455	122.231	45.4571	-1.63972	0.00531391	0.0397937	232.819	74.5779
ACVRL1	33.3166	63.3424	119.266	59.1975	14.0114	26.5079	23.3113	-1.63855	3.58458e-05	0.0010937	68.7805	21.2769
STAP1	351.907	240.701	1375.28	488.077	227.184	98.6684	346.173	-1.63598	0.00671999	0.0472212	613.992	224.009
TRIM21	3855.36	9881.41	11750.2	6125.13	2077.69	2739.15	2152.8	-1.62862	3.89443e-12	5.81155e-09	7903.01	2323.21
IFITM3	12855	34270.7	41469.7	20217.8	6219.04	13555.9	5377.92	-1.62736	0.0069048	0.048006	27203.3	8384.28
MARC1	4816.33	5931.38	11957.6	7107.33	1807.47	3289.93	2109.67	-1.6261	4.44275e-06	0.000238326	7453.17	2402.36
LOC731424	394.594	2470.35	3729.54	1617.66	363.295	868.871	379.974	-1.61954	1.08249e-05	0.00045716	2053.04	537.38
RRM2	1294.14	724.637	741.684	3122.97	262.213	634.718	594.439	-1.61491	0.0043055	0.0343081	1470.86	497.123
EIF2AK2	3259.82	12479.7	16166.7	15305.6	3242.63	3152.97	3545.65	-1.6122	1.33384e-05	0.000535328	11803	3313.75
ASPH	6301.01	6055.53	16171.7	14276.3	1834.49	6469.41	3040.96	-1.61189	0.000652802	0.00908114	10701.1	3781.62
UBE2L6	10639.5	26581	30337	17110.5	6157.99	5550.47	7218.35	-1.60536	7.03012e-05	0.00175914	21167	6308.94
GBP1	8871.59	37529.1	56766.7	24826.7	8385.8	4588.82	11625.4	-1.60521	0.00587509	0.0429002	31998.5	8199.99
RASGEF1A	1289.98	1378.33	2135.6	1710.69	512.416	802.601	327.524	-1.60377	0.000166867	0.00337537	1628.65	547.514
IFITM1	35500.9	96209.4	118278	44689.3	21727.6	33335.2	13392.4	-1.6017	0.000264508	0.00476609	73669.4	22818.4
CDC45	188.447	120.35	101.873	353.977	38.0308	85.4145	72.2651	-1.60014	0.000435285	0.00681144	191.162	65.2368
ZCCHC2	10579.1	24113.2	31040.1	18899.7	8292.73	4582.93	6263.75	-1.59994	0.000114476	0.00255664	21158	6379.8
MELK	140.554	76.0108	67.087	230.75	32.026	45.6526	50.1193	-1.59593	0.000734516	0.00979454	128.6	42.5993
TRIM69	168.665	519.407	499.425	543.651	101.082	132.54	173.669	-1.58073	0.000635551	0.00893199	432.787	135.764
PARP14	24393	62026.1	81776.5	48746.1	19176.6	11457.3	19236.5	-1.57607	0.000373548	0.00613793	54235.4	16623.5
MCM10	76.0035	63.3424	47.2093	188.466	18.0146	45.6526	33.8014	-1.56093	0.00283565	0.0259488	93.7552	32.4895
TMEM60	585.123	831.052	1305.71	843.263	267.217	306.314	303.047	-1.55489	1.47175e-07	1.91736e-05	891.287	292.193
PTGER4P2-CDK2AP2P2	47.8926	97.5472	83.2375	78.5273	22.0179	35.3439	20.9802	-1.55338	0.00106102	0.0129116	76.8012	26.114
PRKCE	1140.05	967.871	2794.05	938.703	502.407	462.416	503.524	-1.54902	4.13075e-05	0.00119799	1460.17	489.449
SSPN	139.513	115.283	58.3905	180.009	35.0284	26.5079	68.7684	-1.54892	0.00201818	0.0206698	123.299	43.4349
IFI35	1539.85	5121.86	5995.59	3670.25	1189.97	1381.36	1155.08	-1.5476	0.000958196	0.0120067	4081.89	1242.13
CDCA5	252.998	169.758	162.748	538.818	66.0536	123.704	108.398	-1.54488	0.00343261	0.0296403	281.08	99.385
FAM72B	65.5921	114.016	57.1481	129.268	17.0138	41.2346	37.2981	-1.54056	0.000392898	0.00634152	91.5061	31.8488
KIAA1958	483.091	1631.7	3105.88	1295.1	414.336	457.998	578.121	-1.54033	0.000149481	0.00312578	1628.94	483.485
PSTPIP2	8207.34	20659.7	35025.6	19540	3635.95	7488.49	7846.59	-1.54001	4.30469e-06	0.000232494	20858.2	6323.68
VNN1	2389.43	8144.56	16076	8517.19	1262.02	5441.49	2151.63	-1.53868	0.000995053	0.0123925	8781.8	2951.72
SLC26A8	2218.68	8117.96	11334	7599.03	1159.94	4147.02	1949.99	-1.53845	0.000189304	0.00371323	7317.41	2418.98
GINS2	116.608	58.275	60.8752	245.247	35.0284	42.7072	44.2915	-1.53428	0.00407599	0.0332654	120.251	40.6757
BTN1A1	41.6458	86.1456	81.9952	73.6949	29.0235	20.6173	22.1458	-1.53416	0.000140677	0.00298733	70.8704	23.9289
CALCRL	40.6046	100.081	247.228	106.314	39.0317	16.1993	58.2783	-1.53092	0.0014839	0.0167181	123.557	37.8364
DHRS9	2558.09	1436.6	6004.28	2238.63	1291.05	873.289	889.327	-1.52452	0.00298644	0.0269058	3059.4	1017.89
GBP3	1587.75	2987.23	6060.19	2646.97	1341.09	742.222	1268.14	-1.52113	0.000744758	0.00988294	3320.53	1117.15
PARP9	24132.7	64647.2	83320.7	49713.8	14987.2	17925.3	18975.4	-1.51908	3.20308e-06	0.000188454	55453.6	17295.9
KIAA1614	87.4561	115.283	200.018	256.12	67.0544	61.8518	41.9604	-1.50803	1.56882e-05	0.000605379	164.719	56.9555
PARP12	3929.28	10209.5	14590.2	7953.01	3632.95	2547.71	2789.2	-1.50691	0.000185174	0.00365718	9170.49	2989.95
ZBTB32	27.0698	34.2049	74.5411	141.349	43.0349	14.7266	27.9736	-1.49793	0.00618969	0.044485	69.2912	28.5784
SAMD4A	229.052	961.537	802.559	382.972	240.195	166.411	219.126	-1.48494	0.00346847	0.0298089	594.03	208.577
LGALS3BP	546.601	1008.41	941.702	567.813	351.285	235.626	208.636	-1.48295	0.00569127	0.0420821	766.132	265.182
CFB	58.3041	107.682	185.11	135.309	36.0292	33.8713	57.1127	-1.47858	0.00189791	0.0198308	121.601	42.3377
GALM	1289.98	2947.95	2030	1193.62	819.665	742.222	364.822	-1.47634	4.39559e-05	0.00125703	1865.39	642.236
FAM19A2	91.6207	724.637	880.827	546.067	70.0568	212.063	224.954	-1.47274	0.00611763	0.0441216	560.788	169.025
SPATC1	33.3166	60.8087	49.694	48.3245	18.0146	30.9259	4.66226	-1.47244	0.00289174	0.0263857	48.036	17.8676
AIM2	1648.13	3259.6	5815.44	3270.36	694.563	1893.84	1129.43	-1.47031	6.15517e-05	0.0016058	3498.38	1239.28
LOC101929023	104.114	159.623	145.355	101.481	37.03	57.4339	43.1259	-1.46905	1.40405e-08	3.15719e-06	127.643	45.8633
OIT3	15.6172	27.8706	44.7246	18.1217	8.00649	5.89065	11.6557	-1.46609	0.00444173	0.0350702	26.5835	8.5176
GIMAP4	7908.53	11964.1	13691.9	11153.3	4058.29	3261.95	4235.67	-1.45731	1.65279e-07	2.08696e-05	11179.5	3851.97
ANLN	274.862	112.749	206.23	263.369	50.0406	120.758	87.4174	-1.4563	0.00704559	0.0486962	214.303	86.0721
PAWR	85.3738	31.6712	162.748	85.776	49.0398	17.672	46.6226	-1.45502	0.00302112	0.0270768	91.3922	37.7781
LRRN1	381.059	516.874	1552.94	462.707	165.134	422.654	203.974	-1.44858	0.00123314	0.0145104	728.395	263.921
BUB1B	190.529	103.881	149.082	378.139	50.0406	94.2504	88.583	-1.44471	0.00430014	0.0342987	205.408	77.6247
STAT2	14045	45451.9	55822.6	33345.1	12441.1	10332.2	13837.6	-1.43891	0.000186982	0.00368464	37166.2	12203.6
GGH	194.694	184.96	243.501	588.351	64.0519	189.974	108.398	-1.43193	0.000896085	0.0114025	302.876	120.808
ANG	71.839	59.5418	91.934	67.6543	30.0244	29.4533	22.1458	-1.42527	0.000598832	0.00850357	72.7423	27.2078
SRBD1	3571.13	4167.93	5668.85	5647.93	2028.65	1385.78	1810.12	-1.4252	1.19017e-10	7.06486e-08	4763.96	1741.52
HIST1H3D	89.5384	131.752	371.463	225.917	46.0373	97.1958	75.7618	-1.42382	0.0027672	0.0255907	204.668	72.9983
KIF2C	204.064	110.216	146.597	376.931	58.0471	82.4691	95.5764	-1.42001	0.00142314	0.0162003	209.452	78.6975
PFN4	24.9875	20.2696	21.12	25.3704	11.0089	11.7813	3.4967	-1.41866	0.00237138	0.0231291	22.9368	8.76231
WDR34	53.0984	36.7386	53.4211	72.4868	26.0211	17.672	17.4835	-1.41829	0.000835934	0.0107961	53.9362	20.3922
ZNF396	142.637	326.847	326.738	263.369	89.0722	125.176	71.0995	-1.41129	1.04884e-06	8.05945e-05	264.898	95.116
GAPT	4674.74	8022.94	10553.8	15362.4	3128.54	2740.63	4366.21	-1.40917	5.03926e-05	0.00139258	9653.45	3411.79
ZBP1	4969.38	11100.1	13489.4	10109.5	4263.46	3142.66	3165.68	-1.40542	9.61663e-06	0.000416509	9917.11	3523.93
CCNB1	212.393	127.952	120.508	323.774	52.0422	85.4145	87.4174	-1.40519	0.00304258	0.0272323	196.157	74.958
NUDT16P1	732.966	355.984	694.474	1059.51	311.252	198.81	301.882	-1.40119	0.000122693	0.0027143	710.735	270.648
DDX58	7573.28	20547	25986.3	13992.4	6085.94	5518.07	5672.81	-1.399	0.000462944	0.00712873	17024.7	5758.94
DIRAS1	46.8515	50.6739	36.0282	30.2028	28.0227	7.36332	16.3179	-1.39792	0.00682686	0.0476053	40.9391	17.2347
DTX3L	8320.83	20744.6	29673.6	19537.6	5728.65	6375.16	8020.26	-1.39382	5.44211e-06	0.000282697	19569.1	6708.02
GINS1	102.032	55.7413	72.0564	167.928	32.026	45.6526	34.967	-1.39267	0.000806519	0.0105322	99.4394	37.5485
ERLIN1	4156.25	3036.63	6570.79	8354.1	1950.58	2510.89	1874.23	-1.39146	0.000494034	0.00747426	5529.44	2111.9
IRAK3	30302.5	39784.1	68441.1	61781.7	11812.6	33252.7	15112.7	-1.38836	0.000313974	0.00541944	50077.3	20059.3
RGS16	34.3578	59.5418	103.115	175.176	22.0179	54.4885	32.6358	-1.38064	0.00601024	0.0435576	93.0478	36.3807
IFI16	15056	35887.2	47429.2	33151.8	9131.41	13471.9	12684.9	-1.37673	3.66288e-10	1.5417e-07	32881.1	11762.7
TNFAIP6	1881.35	5878.17	8318.78	4565.46	1272.03	1406.39	1996.61	-1.37311	0.000317702	0.00545511	5160.94	1558.35
CLEC4D	5876.22	8505.61	16272.3	11994.1	2698.19	6621.09	3508.35	-1.36646	9.04603e-05	0.00214437	10662.1	4275.88
MCEMP1	2199.94	6411.51	12173.8	4419.28	981.796	5572.56	1600.32	-1.3604	2.46003e-06	0.000154718	6301.13	2718.23
KL	41.6458	96.2804	109.327	115.979	22.0179	54.4885	30.3047	-1.36001	0.00432003	0.0343906	90.808	35.6037
LOC102546294	63.5098	91.213	98.1457	49.5326	32.026	39.7619	16.3179	-1.35558	7.28301e-06	0.000341573	75.6003	29.3686
EPB41L5	697.567	1863.53	3871.17	2271.25	684.555	650.917	961.592	-1.35426	0.00191164	0.0199236	2175.88	765.688
LOC102724552	589.288	1486.01	887.039	711.578	307.249	397.619	317.034	-1.34945	9.19355e-06	0.000407754	918.479	340.634
GTSE1	94.7441	54.4744	73.2987	209.003	26.0211	61.8518	45.4571	-1.34898	0.00436179	0.0346055	107.88	44.4433
IL18RAP	20710.4	45334.1	77018.3	80543.7	10137.2	38106.6	18731.8	-1.34774	0.00174506	0.0186979	55901.6	22325.2
ZNF366	64.551	269.838	377.675	230.75	68.0552	89.8324	97.9075	-1.34499	0.00211313	0.0213196	235.703	85.2651
TRIM5	1674.16	2475.42	3893.53	2726.71	1142.93	824.691	1135.26	-1.34373	5.38704e-07	5.05909e-05	2692.45	1034.29
MAP2K6	1136.93	3073.37	4543.28	3033.57	735.597	1876.17	806.572	-1.3427	2.67686e-09	8.45012e-07	2946.79	1139.45
NTNG2	1155.67	2110.57	3084.76	1641.83	758.615	914.524	529.167	-1.34082	0.000268654	0.00483019	1998.2	734.102
BTN2A3P	284.232	548.545	600.055	471.164	195.158	144.321	199.312	-1.33918	9.46741e-05	0.00219665	475.999	179.597
APOL6	16667.7	62796.3	88111.3	49593	17961.6	13638.3	24560.8	-1.33285	0.00385558	0.0321429	54292.1	18720.2
EYS	270.698	523.208	488.244	668.086	178.144	194.392	194.649	-1.33187	1.97789e-05	0.000720919	487.559	189.062
TDRD9	616.357	2543.83	3458.7	1025.69	348.282	1600.78	383.471	-1.33163	0.00070511	0.00955771	1911.14	777.513
LOC100419583	2978.71	4569.52	6632.91	4994.34	1662.35	1724.49	2065.38	-1.33145	7.60744e-05	0.0018694	4793.87	1817.41
SHISA5	8207.34	16056	22221.9	11630.5	5921.8	5915.69	4213.52	-1.33093	3.32047e-05	0.00104217	14528.9	5350.34
TFCP2L1	85.3738	300.243	436.065	134.1	53.043	192.919	43.1259	-1.32061	0.00521487	0.0392131	238.946	96.3626
BMX	967.223	1603.83	2918.28	1512.56	529.429	1094.19	468.557	-1.3192	0.00692425	0.0480802	1750.47	697.392
TRAFD1	7305.71	18890	23976.1	10685.8	4480.63	6342.76	5649.5	-1.31877	5.86732e-06	0.000297259	15214.4	5490.96
AMIGO2	583.041	891.86	1459.76	695.873	452.367	256.243	385.802	-1.31797	0.000323425	0.005513	907.634	364.804
ZNF496	118.69	340.782	518.06	268.201	129.105	104.559	118.888	-1.31668	0.00447291	0.0352824	311.433	117.517
BST2	1713.72	3515.5	4435.19	2328.03	1339.09	1105.97	997.724	-1.31489	0.00251786	0.0241418	2998.11	1147.59
CLEC4E	30583.6	26344.1	38586.2	47524.7	12791.4	17963.5	13142.9	-1.31342	0.00102232	0.0126365	35759.7	14632.6
ESPL1	199.9	130.485	168.96	304.444	59.0479	122.231	73.4306	-1.31213	0.000348381	0.00582943	200.947	84.9032
IRF2BPL	2724.67	3068.3	6199.33	2332.87	1728.4	1454.99	949.936	-1.30147	0.000130597	0.00283565	3581.29	1377.78
HELZ2	1286.85	2927.68	4710.99	2503.21	1235	1136.9	738.969	-1.2959	0.000659177	0.00913437	2857.19	1036.96
SMARCD3	2792.35	5936.45	7180.79	4730.97	1293.05	3606.55	1510.57	-1.29296	5.2285e-08	8.66927e-06	5160.14	2136.72
HIST1H2BD	898.508	1330.19	2648.69	1252.81	433.351	683.316	694.677	-1.29105	0.00209092	0.0211736	1532.55	603.781
CC2D2B	220.723	494.07	406.249	288.739	98.0795	156.102	163.179	-1.28266	7.78879e-05	0.00189693	352.445	139.12
ZNF844	718.39	553.612	699.444	1252.81	432.351	268.025	319.365	-1.28056	4.20364e-06	0.000229537	806.065	339.913
CCNA2	264.451	195.094	213.684	591.975	94.0763	163.466	141.033	-1.27776	0.00660676	0.0467054	316.301	132.858
CH17-340M24.3	17.6995	38.0054	36.0282	16.9136	8.00649	14.7266	10.4901	-1.27471	0.00477674	0.0369096	27.1617	11.0744
VAMP5	511.202	1164.23	889.523	675.335	235.191	418.236	329.855	-1.27403	0.00392101	0.0324903	810.073	327.761
C1orf115	74.9624	98.8141	130.447	114.771	63.0511	36.8166	36.1325	-1.27288	0.0019797	0.02042	104.749	45.3334
MARCH3	95.7853	267.305	253.44	166.72	79.0641	88.3598	64.1061	-1.27199	1.45862e-05	0.000571139	195.812	77.1767
AMN1	1503.41	2491.89	3200.3	2909.14	924.75	1050.01	1090.97	-1.27103	3.84442e-06	0.000215379	2526.18	1021.91
NT5C3A	6775.77	10440.1	12245.9	8935.2	3785.07	3772.96	4042.18	-1.26925	2.04238e-05	0.000733602	9599.23	3866.74
RNF144B	10130.3	14547.2	23084.1	27436.2	5595.54	10743.1	7020.2	-1.26818	0.00059885	0.00850357	18799.5	7786.27
ZNF230	1117.15	1815.39	2349.29	2523.75	803.652	888.016	669.035	-1.26693	9.83633e-06	0.000423789	1951.39	786.901
CDC6	248.834	220.431	272.075	685	122.099	181.138	148.027	-1.26362	0.00195631	0.0202989	356.585	150.421
AURKB	222.805	239.434	183.868	303.236	96.0779	126.649	76.9273	-1.26324	2.82885e-05	0.000941899	237.336	99.8848
SAMD9	6797.63	13953.1	18432.8	18758.4	6219.04	3951.16	6629.74	-1.26194	0.00059242	0.00845474	14485.5	5599.98
MOV10	1927.16	4490.97	6968.35	3474.53	1786.45	1606.68	1546.71	-1.25958	0.00594034	0.0431845	4215.25	1646.61
TBC1D8	1080.71	4262.94	4989.28	3226.87	706.573	2049.95	1245.99	-1.25905	0.000152178	0.00316204	3389.95	1334.17
B4GALT4	1321.21	928.599	1661.02	1757.8	727.59	574.339	486.041	-1.25633	0.000165793	0.00336403	1417.16	595.99
MYLK3	40.6046	97.5472	98.1457	99.0652	34.0276	36.8166	30.3047	-1.2558	0.00013577	0.00292093	83.8407	33.7163
RMI1	831.874	1051.48	1398.89	1122.34	440.357	421.182	510.518	-1.24954	4.35576e-07	4.34112e-05	1101.15	457.352
MIR181A1HG	108.279	385.122	475.82	367.266	76.0617	173.774	135.206	-1.24492	0.00164004	0.0179955	334.122	128.347
PRRG4	3973.01	9439.28	12706.8	6121.51	2085.69	3861.32	3557.31	-1.24129	1.26385e-05	0.000517359	8060.14	3168.11
UPB1	252.998	654.96	1075.88	360.018	135.11	385.838	186.491	-1.23954	0.00425953	0.0340908	585.963	235.813
KLHDC8B	2033.36	644.825	1196.38	1802.5	794.644	518.377	446.412	-1.23916	0.00224769	0.0223205	1419.27	586.478
NSUN7	1147.34	4967.31	3876.13	2875.31	628.51	2491.75	1010.55	-1.23227	0.00123681	0.0145126	3216.52	1376.93
HEXIM2	425.828	519.407	632.357	496.534	232.188	206.173	215.63	-1.23166	3.05922e-15	2.51086e-11	518.532	217.997
LOC400927-CSNK1E	30.1932	40.5391	69.5717	53.157	23.0187	23.5626	13.9868	-1.22985	0.000610773	0.00865042	48.3652	20.1894
CCDC121	81.2093	115.283	126.72	124.436	53.043	42.7072	43.1259	-1.22943	7.7316e-06	0.000357505	111.912	46.2921
ZNF93	236.34	254.636	509.364	303.236	185.15	63.3245	167.841	-1.22644	0.00226189	0.0224369	325.894	138.772
TDRD7	2004.2	5452.51	6563.34	4096.71	1643.33	2005.77	1664.43	-1.22464	4.07059e-05	0.00119576	4529.19	1771.18
CEACAM1	4468.59	8237.04	14449.8	5568.19	3131.54	3770.02	2616.7	-1.2224	0.00279907	0.0257838	8180.9	3172.75
IL15	665.291	2000.35	1267.2	936.287	338.274	671.534	490.703	-1.22162	6.25372e-05	0.00162686	1217.28	500.171
TNFSF10	8811.21	31637	38068.1	18603.7	7297.92	10030.3	8916.58	-1.21981	0.00269976	0.0252085	24280	8748.27
MAP1LC3B2	157.213	252.103	613.721	212.628	128.104	141.376	86.2519	-1.21866	0.000740933	0.00985609	308.916	118.577
TXLNB	237.381	105.148	295.68	316.526	130.106	51.5432	152.689	-1.21857	0.00164905	0.0180016	238.684	111.446
SDC3	59.3452	146.954	249.713	106.314	43.0349	80.9965	48.9538	-1.21199	0.00126896	0.014818	140.581	57.6617
CHMP5	3167.16	7967.2	8187.09	4659.69	2021.64	2870.22	2307.82	-1.21019	2.41334e-10	1.16847e-07	5995.29	2399.89
BTN3A1	28447.2	32475.6	62464.2	52511.8	19649.9	9978.77	28988.8	-1.20154	0.000503946	0.00756149	43974.7	19539.2
ZNF441	529.943	390.189	523.03	746.614	297.241	212.063	217.961	-1.19859	3.46924e-06	0.000199117	547.444	242.422
PLTP	74.9624	83.6119	244.743	77.3192	27.0219	95.7231	44.2915	-1.19857	0.00259	0.0245893	120.159	55.6788
CLMP	144.719	198.895	229.835	146.182	75.0609	78.0511	75.7618	-1.19703	9.28416e-05	0.00218337	179.908	76.2913
TYMP	3473.26	12049	12508	5931.83	2395.94	4525.49	3085.25	-1.19675	0.000359797	0.00595993	8490.52	3335.56
TRMT1L	1333.71	1797.66	2180.33	1999.43	806.654	835	724.982	-1.19619	3.71903e-08	6.63563e-06	1827.78	788.879
BTN2A2	2238.46	2629.97	3459.95	3327.14	1339.09	1008.77	1535.05	-1.19178	0.000187513	0.00369069	2913.88	1294.3
RP9P	108.279	120.35	127.962	105.106	53.043	33.8713	62.9406	-1.1905	8.58433e-07	7.04082e-05	115.424	49.9516
NUF2	184.283	97.5472	151.567	323.774	65.0528	82.4691	101.404	-1.18916	0.00496221	0.0379742	189.293	82.9754
FAM174B	109.32	190.027	168.96	146.182	37.03	114.868	58.2783	-1.1841	0.00027423	0.00490358	153.622	70.0587
NOXRED1	234.257	381.321	525.514	442.169	145.118	216.481	152.689	-1.18166	7.27541e-05	0.00180675	395.816	171.429
BISPR	744.418	1801.46	2013.85	1336.17	615.499	499.233	734.306	-1.17896	0.000222135	0.00417053	1473.97	616.346
KPTN	223.846	597.952	653.477	492.91	218.177	197.337	194.649	-1.17563	0.000698225	0.00950362	492.046	203.388
DHCR24	533.066	240.701	395.068	343.104	129.105	184.083	186.491	-1.17051	0.000535594	0.00788719	377.985	166.559
PML	1563.8	4104.58	5789.36	2820.94	1785.45	1301.83	1255.31	-1.1699	0.004793	0.0369897	3569.67	1447.53
CCDC62	78.0858	138.086	191.322	111.146	56.0455	75.1058	37.2981	-1.16964	3.10426e-05	0.00100308	129.66	56.1498
GEN1	639.263	566.281	2571.67	1292.68	512.416	487.451	667.869	-1.16944	0.00593983	0.0431845	1267.47	555.912
KLHL8	4227.05	3116.44	5402.98	5819.48	1821.48	2434.31	1991.95	-1.16752	0.00143274	0.0162983	4641.49	2082.58
PHF11	2870.44	7084.21	7105	5325.36	1986.61	2516.78	2561.91	-1.16372	7.54353e-06	0.000349794	5596.25	2355.1
POC1A	99.9499	126.685	105.6	108.73	25.0203	85.4145	47.7882	-1.16358	4.18982e-05	0.00121084	110.241	52.741
MAB21L3	211.352	487.736	509.364	763.527	212.172	270.97	157.351	-1.16098	0.0062629	0.0448345	492.995	213.498
SFRP2	48.9338	40.5391	62.1175	55.5732	16.013	41.2346	16.3179	-1.15973	0.00343796	0.0296554	51.7909	24.5218
UBE2C	251.957	225.499	330.465	343.104	91.0739	166.411	137.537	-1.15885	0.000189095	0.00371323	287.756	131.674
EFCAB2	420.622	1696.31	2452.4	1571.75	370.3	948.395	576.955	-1.15781	0.00330608	0.0288974	1535.27	631.883
CYSLTR1	1999	2871.94	3350.62	3887.71	1663.35	1023.5	1364.88	-1.15266	0.000517919	0.00769385	3027.32	1350.58
TNFAIP8L2	499.749	1090.76	786.408	554.524	264.214	366.693	312.372	-1.15144	1.47131e-14	8.05049e-11	732.859	314.426
NAT1	283.191	358.518	489.486	564.189	164.133	176.72	223.789	-1.14743	2.29893e-06	0.00014741	423.846	188.214
AANAT	135.349	182.426	537.938	240.414	99.0804	139.903	108.398	-1.14531	0.00542154	0.0404337	274.032	115.794
HSPA6	7926.23	14715.7	15425	9107.96	4364.54	7609.25	3863.85	-1.13852	0.00309892	0.0276161	11793.7	5279.21
DDAH2	840.204	2448.82	3056.18	1199.66	641.52	1248.82	543.154	-1.13825	8.84006e-05	0.00210786	1886.21	811.164
APOL1	3949.06	10356.5	16640	5830.35	3501.84	3453.39	3796.25	-1.12853	0.00676141	0.0473501	9193.98	3583.83
LINC00671	1160.88	1603.83	890.766	1450.94	576.468	836.473	421.935	-1.12466	0.00145828	0.0165315	1276.6	611.625
SDC4	330.043	535.876	436.065	566.605	170.138	175.247	285.564	-1.12201	0.00319654	0.0282103	467.147	210.316
POU5F1	215.517	305.31	622.418	386.596	110.089	262.134	150.358	-1.1187	0.000715578	0.00965971	382.46	174.194
SPTLC2	8546.75	8864.13	11729	12185	4050.28	6021.72	4367.38	-1.11572	8.43523e-06	0.000383558	10331.2	4813.13
MYO7A	140.554	176.092	197.534	413.175	73.0593	142.848	111.894	-1.11504	0.00626689	0.0448435	231.839	109.267
RNF122	2050.01	1672.24	1724.38	1721.56	712.578	1048.54	763.446	-1.1133	0.000727648	0.00974362	1792.05	841.52
ABCG1	2117.69	3691.59	6345.93	5661.22	1927.56	2082.35	1746.02	-1.11121	0.000117062	0.00260023	4454.11	1918.64
ITPKC	371.689	510.539	939.217	583.518	225.183	368.166	229.616	-1.1087	0.000689367	0.00940645	601.241	274.322
KIAA0040	10638.4	24920.1	29544.3	17727.8	7976.47	10380.8	8469	-1.10679	7.37612e-08	1.13158e-05	20707.7	8942.09
SLC22A1	682.991	1565.82	1182.72	1051.06	388.315	833.527	360.16	-1.1063	0.00147713	0.0166876	1120.65	527.334
RAP2C-AS1	123.896	238.167	263.378	218.668	89.0722	89.8324	107.232	-1.10375	7.19851e-06	0.000338577	211.028	95.3789
LILRA6	3695.02	6595.21	8161	4984.67	1574.28	5331.04	1968.64	-1.10297	3.45309e-09	1.04968e-06	5858.98	2957.99
LGALSL	4966.26	5966.85	8635.58	4741.84	1751.42	4130.82	2697.12	-1.10106	0.00117862	0.0140502	6077.63	2859.79
SMIM14	1060.93	2410.81	2457.37	1420.74	711.577	966.067	762.28	-1.10049	1.61655e-10	8.52066e-08	1837.46	813.308
GYG1	4151.04	9033.89	13508.1	6137.21	1584.28	8746.15	2735.58	-1.0998	3.54004e-06	0.000202473	8207.56	4355.34
FRMD3	1141.09	1436.6	1617.54	1228.65	403.327	646.499	832.214	-1.0972	0.00495753	0.0379561	1355.97	627.347
CAPG	1813.67	4517.58	4801.69	3022.7	1043.85	2577.16	1296.11	-1.09417	3.41389e-08	6.36808e-06	3538.91	1639.04
APOL2	9095.44	21679.6	20401.9	13132.2	6420.21	7351.53	7061	-1.09207	7.84714e-05	0.00190267	16077.3	6944.25
CARD6	1001.58	2380.41	3990.43	2352.2	635.515	1331.29	1180.72	-1.09094	0.00060306	0.00855595	2431.15	1049.17
DACH1	287.356	614.421	586.39	477.204	144.117	404.982	171.338	-1.08958	2.23988e-09	7.35353e-07	491.343	240.146
LINC01137	85.3738	172.291	178.899	142.557	73.0593	63.3245	55.9472	-1.08296	0.00017619	0.00353133	144.78	64.1103
HCP5	5161.99	9164.37	15124.4	9890.82	5167.19	3391.54	4537.55	-1.07892	0.00035418	0.00589642	9835.39	4365.43
PARP11	846.45	1788.79	3037.55	1442.49	875.71	643.554	883.499	-1.07855	0.00347802	0.0298597	1778.82	800.921
NMI	8030.35	16944.1	16725.8	11068.7	4964.03	6791.92	5902.43	-1.07749	6.81065e-05	0.00171995	13192.2	5886.12
ACO1	670.497	1337.79	1641.15	1472.69	694.563	425.6	600.266	-1.07741	0.00621186	0.0445906	1280.53	573.476
RMI2	207.188	216.631	299.407	264.577	92.0747	173.774	95.5764	-1.07685	0.0025228	0.0241634	246.95	120.475
CMYA5	51.0161	46.8733	48.4517	72.4868	21.017	30.9259	26.808	-1.07473	0.00617737	0.0444159	54.707	26.2503
SOWAHD	35.3989	50.6739	37.2705	37.4515	18.0146	23.5626	15.1524	-1.07391	0.00404604	0.0332079	40.1987	18.9099
MOCS3	107.238	78.5445	118.023	152.222	48.039	57.4339	58.2783	-1.07384	3.59802e-05	0.00109504	114.007	54.5837
SLC22A15	6725.79	7498.47	10962.5	10150.6	4222.42	4650.67	3568.96	-1.07082	6.01046e-06	0.000299884	8834.33	4147.35
LINC00467	79.127	173.558	152.809	187.257	46.0373	70.6878	86.2519	-1.06659	0.00110683	0.0133691	148.188	67.659
HNRNPLL	2092.7	4275.61	3872.41	3037.2	1328.08	1908.57	1408	-1.06648	1.28597e-06	9.34038e-05	3319.48	1548.22
CXorf21	2460.22	4845.69	5466.34	4293.63	1765.43	2114.74	1875.4	-1.0651	0.000687552	0.00938949	4266.47	1918.52
C11orf68	417.499	710.701	723.048	502.575	269.218	298.951	247.1	-1.06273	1.56513e-10	8.52066e-08	588.456	271.756
HCG26	2879.81	4249.01	4620.3	3350.1	2121.72	1409.34	1895.21	-1.06009	1.70032e-05	0.000646081	3774.8	1808.76
LINC01191	64.551	116.55	101.873	102.69	32.026	54.4885	50.1193	-1.05858	0.00351756	0.0300958	96.4158	45.5446
STOML1	55.1807	111.483	136.659	71.2786	43.0349	47.1252	40.7948	-1.05606	0.00399597	0.0329452	93.6501	43.6516
E2F2	778.776	866.523	937.975	1535.51	306.248	755.476	490.703	-1.0557	0.00423425	0.0340435	1029.7	517.476
GLMP	521.613	600.486	1464.73	740.573	338.274	571.393	296.054	-1.05384	0.00185517	0.0194835	831.851	401.907
AGTRAP	3058.88	6393.78	5627.85	3363.39	1957.59	3476.96	1220.35	-1.04818	0.000129086	0.00281774	4610.97	2218.3
CFAP58-AS1	1052.6	1548.09	1729.35	942.328	597.485	742.222	522.173	-1.0458	0.00164668	0.0180016	1318.09	620.627
C9orf40	201.982	253.369	196.291	221.085	93.0755	101.614	122.384	-1.04556	8.47885e-08	1.25388e-05	218.182	105.691
HSD17B13	322.755	349.65	566.512	437.337	196.159	175.247	222.623	-1.04284	3.567e-06	0.000203307	419.063	198.01
STAT1	15563	46046.1	59360.8	34926.5	14632.9	13820.9	20779.7	-1.04252	0.00142069	0.0161836	38974.1	16411.2
KIF11	465.392	268.572	330.465	799.771	169.137	242.989	271.577	-1.03822	0.00527612	0.0395649	466.05	227.901
MCM2	355.03	200.162	262.136	641.508	183.149	187.028	157.351	-1.03686	0.000286872	0.00505801	364.709	175.843
CKAP2L	219.681	188.76	249.713	279.074	76.0617	209.118	90.9141	-1.03672	0.00681665	0.0475778	234.307	125.365
PTPRN2	617.399	730.971	1057.24	335.855	441.358	344.603	180.663	-1.03435	0.00710003	0.048848	685.366	322.208
KRCC1	2032.31	2826.34	2623.85	2689.26	1206.98	1223.78	1255.31	-1.02798	3.01601e-06	0.000182014	2542.94	1228.69
TMEM140	2955.81	6586.34	10127.6	6743.68	3100.51	2387.19	3049.12	-1.02556	0.00195778	0.0203013	6603.37	2845.61
C9orf64	211.352	169.758	203.746	239.206	87.0706	86.8871	131.709	-1.02437	0.00242088	0.0234585	206.015	101.889
WSB1	8454.09	22585.3	39315.4	22404.4	8436.84	12922.6	9895.65	-1.0237	0.000124734	0.00274879	23189.8	10418.4
NBN	6268.73	13481.8	18016.6	11084.4	4838.92	5672.7	5956.04	-1.02333	0.000618599	0.00872363	12212.9	5489.22
APOBEC3A	3099.49	7968.47	6522.34	5350.73	2601.11	3382.71	2001.28	-1.02294	7.91457e-05	0.00191337	5735.26	2661.7
PSMB9	4719.51	9313.86	8046.71	6143.25	3251.64	3155.92	3475.72	-1.02221	0.00016832	0.00339431	7055.83	3294.42
GDPD3	1236.88	1787.52	1807.62	1312.01	686.557	969.012	601.432	-1.02082	3.60632e-09	1.0571e-06	1536.01	752.334
DLGAP1-AS2	211.352	290.108	110.569	414.383	116.094	131.067	134.04	-1.01858	0.00643003	0.0456922	256.603	127.067
SPRY2	206.147	225.499	433.58	356.393	82.0666	204.7	167.841	-1.01522	0.00603651	0.0436709	305.405	151.536
POLR3GL	2567.46	1959.81	2746.84	2045.33	1096.89	1217.89	1151.58	-1.01154	8.04141e-09	2.09523e-06	2329.86	1155.45
RGS18	17697.4	23142.8	33654	30775.5	12413.1	10723.9	14930.9	-1.01052	0.00157632	0.0174721	26317.4	12689.3
ARL4A	1563.8	2113.1	1875.95	2140.78	753.611	1126.59	987.234	-1.00793	2.10309e-05	0.000752117	1923.41	955.811
BTN3A3	6461.34	7445.26	9379.75	8037.57	4946.01	2599.25	4389.52	-1.00684	9.93771e-06	0.000427035	7830.98	3978.26
NHLH1	58.3041	163.423	120.508	74.903	34.0276	86.8871	34.967	-1.0067	0.00405489	0.0332472	104.285	51.9606
RAB13	597.617	527.008	816.225	293.571	157.127	449.162	304.213	-1.00461	0.00458279	0.0358563	558.605	303.501
DHRS7B	366.483	581.483	496.94	344.312	171.139	291.587	205.14	-1.00392	2.60957e-05	0.000886876	447.305	222.622
RNF135	2113.52	4817.82	4778.08	3035.99	1249.01	2474.07	1641.12	-1.00335	1.66342e-13	3.90071e-10	3686.35	1788.07
SOCS5	1977.13	1080.62	2033.73	3080.69	1065.86	874.762	1108.45	-1.00174	0.00316435	0.0280468	2043.04	1016.36
TLR5	1813.67	7580.81	11522.8	4097.92	947.769	6241.15	2368.43	-1.00026	0.00438854	0.0347841	6253.8	3185.78
SEPHS2	2825.67	5088.92	4994.25	3582.05	1520.23	2911.45	1741.36	-0.999577	4.54572e-14	1.52501e-10	4122.72	2057.68
LOC100130705	42.6869	45.6065	63.3599	55.5732	21.017	38.2892	19.8146	-0.99874	0.00421914	0.0339663	51.8066	26.3736
PAQR6	604.905	1126.23	1857.31	699.497	381.309	792.293	390.465	-0.998677	0.000590531	0.00845124	1071.99	521.356
COX10-AS1	345.66	135.553	140.386	148.598	478.388	237.099	421.935	0.995031	6.70924e-08	1.04888e-05	192.549	379.141
CACNA2D2	243.628	124.151	101.873	149.806	397.322	222.372	301.882	0.995101	0.00140256	0.0160216	154.864	307.192
LINC01024	76.0035	17.7359	32.3011	20.5379	109.088	27.9806	83.9207	0.995182	0.00168911	0.0182653	36.6446	73.6633
LRIG1	700.69	340.782	351.585	282.698	1091.89	561.085	853.194	0.996022	0.000354965	0.00589762	418.939	835.388
AKT3	745.459	263.504	521.787	474.788	1143.93	528.686	1391.69	0.997494	7.1768e-06	0.000338526	501.385	1021.43
DDX21	5826.24	9287.26	6511.16	7629.23	11260.1	11638.5	19637.5	0.997844	0.000524064	0.00775001	7313.47	14178.7
ZNF674-AS1	519.531	348.383	280.771	340.688	772.627	652.39	806.572	0.998196	5.48402e-07	5.05909e-05	372.343	743.863
CTSF	183.241	22.8032	63.3599	68.8624	220.179	82.4691	169.007	1.00086	0.00177046	0.0188715	84.5667	157.218
LOC100499484	71.839	22.8032	27.3317	30.2028	102.083	36.8166	89.7486	1.00099	0.0066195	0.046715	38.0442	76.216
MAGEE1	166.583	32.938	59.6328	55.5732	227.184	55.9612	188.822	1.00166	0.00239788	0.0233182	78.6818	157.322
PRPF40B	74.9624	50.6739	40.9976	32.619	130.106	79.5238	92.0797	1.00176	3.29354e-05	0.0010357	49.8132	100.57
MAP9	144.719	39.2723	84.4799	86.9841	247.2	78.0511	223.789	1.00197	0.000223434	0.00418684	88.8638	183.013
FBXO32	1095.28	233.1	226.108	579.894	1460.18	612.628	892.823	1.00494	0.0050699	0.0386671	533.596	988.545
BEX2	174.912	51.9407	83.2375	45.9083	203.165	116.34	196.981	1.00733	0.00416596	0.0336805	88.9997	172.162
CASD1	781.899	326.847	368.978	419.215	1108.9	646.499	1074.65	1.01036	2.15652e-12	3.93325e-09	474.235	943.35
PLEKHB1	294.644	74.744	62.1175	56.7813	391.317	104.559	208.636	1.01306	0.00362659	0.0307316	122.072	234.838
ANKS6	265.492	74.744	125.477	101.481	365.296	119.286	390.465	1.01575	3.45685e-06	0.000199103	141.799	291.682
SNORD18B	29.152	21.5364	28.5741	19.3298	55.0446	38.2892	57.1127	1.01595	0.00131716	0.0152154	24.6481	50.1489
TXK	3465.97	717.035	607.51	1267.31	3955.21	1500.64	2658.66	1.01845	0.000479276	0.0072913	1514.46	2704.84
GNL1	1689.78	1948.41	1391.43	1662.36	3654.96	2992.45	3550.31	1.0191	8.86818e-06	0.00039798	1673	3399.24
ME3	60.3864	32.938	27.3317	30.2028	91.0739	53.0159	86.2519	1.02313	0.00163936	0.0179955	37.7147	76.7805
CACNA1C	54.1395	16.469	28.5741	10.873	70.0568	35.3439	60.6094	1.0249	0.00515362	0.0390026	27.5139	55.3367
SNORD30	31.2343	6.33424	12.4235	14.4974	41.0333	19.1446	37.2981	1.0261	0.00537132	0.0401577	16.1224	32.492
C21orf62-AS1	38.5223	13.9353	16.1506	25.3704	67.0544	11.7813	71.0995	1.02728	0.00300637	0.0270112	23.4946	49.9784
ZXDA	245.71	143.154	141.628	171.552	413.335	225.317	453.405	1.02859	5.59319e-11	4.49136e-08	175.511	364.019
BRD7P3	23.9463	32.938	24.847	30.2028	50.0406	55.9612	64.1061	1.03272	0.000551837	0.00803502	27.9835	56.7026
DOCK3	274.862	88.6793	42.2399	53.157	356.289	117.813	186.491	1.03469	0.00681768	0.0475778	114.735	220.198
EDARADD	28.1109	20.2696	9.93881	21.746	52.0422	27.9806	41.9604	1.03607	0.00305595	0.0273072	20.0163	40.6611
SLC4A7	2005.24	809.515	997.608	1112.67	2891.34	1715.65	2883.61	1.04098	2.42022e-10	1.16847e-07	1231.26	2496.87
TNK1	91.6207	58.275	44.7246	39.8677	176.143	88.3598	106.066	1.04305	0.00116688	0.0139609	58.622	123.523
PANK1	36.4401	36.7386	24.847	41.0758	66.0536	70.6878	79.2585	1.04684	0.00119169	0.0141546	34.7754	72
DUSP10	332.125	561.213	370.221	280.282	785.637	840.891	756.452	1.04769	0.000271823	0.00486585	385.96	794.327
ETS1	25597.6	6434.32	6599.37	9691.48	31612.6	13977	23105	1.0491	4.39004e-07	4.34112e-05	12080.7	22898.2
LINC01237	79.127	22.8032	36.0282	33.8272	135.11	51.5432	80.424	1.04965	0.00330856	0.0289036	42.9464	89.0256
SNORA21	14.576	13.9353	23.6047	19.3298	39.0317	38.2892	33.8014	1.05179	0.00650715	0.0460862	17.8615	37.0408
MAST4	427.91	358.518	195.049	201.755	564.458	770.203	503.524	1.05293	0.00128443	0.0149388	295.808	612.728
DTX3	612.193	148.221	141.628	206.587	691.561	368.166	480.213	1.0542	2.18452e-05	0.000776166	277.157	513.313
SLC7A5P2	36.4401	46.8733	28.5741	43.4921	89.0722	88.3598	66.4373	1.05434	0.00297756	0.0268701	38.8449	81.2898
IL2RA	289.438	200.162	140.386	143.765	342.278	400.564	416.107	1.05629	0.000597333	0.00849672	193.438	386.316
FAM169A	401.882	117.817	232.32	183.633	661.537	216.481	627.074	1.05883	0.000368938	0.00607915	233.913	501.697
SNORA9	82.2504	122.884	122.993	94.2328	154.125	223.845	273.908	1.06118	0.00312118	0.0277692	105.59	217.293
SEMA4C	245.71	72.2103	90.6916	66.4462	342.278	150.212	223.789	1.06588	0.00372958	0.0312991	118.765	238.759
PKIA	265.492	97.5472	83.2375	193.298	378.307	175.247	437.087	1.06607	0.000726519	0.00974362	159.894	330.214
FAM229B	28.1109	11.4016	11.1812	21.746	53.043	20.6173	41.9604	1.06683	0.00120702	0.0142644	18.1099	38.5402
TAF13	1033.86	937.467	746.653	869.841	1738.41	1904.15	2045.57	1.06857	9.15675e-05	0.0021596	896.954	1896.04
SNORA66	34.3578	19.0027	13.6659	16.9136	51.0414	23.5626	59.4439	1.07022	0.00333909	0.0290467	20.985	44.6826
ENO2	1081.75	329.38	459.67	419.215	1730.4	586.12	1328.75	1.07214	8.39346e-07	7.02582e-05	572.504	1215.09
TMEM120B	295.685	164.69	178.899	241.623	480.39	450.635	452.24	1.07405	4.07021e-11	4.17578e-08	220.224	461.088
CYP3A5	67.6744	22.8032	47.2093	37.4515	122.099	50.0705	109.563	1.07441	1.00641e-05	0.000431338	43.7846	93.9109
SOCS2-AS1	32.2755	11.4016	12.4235	6.04056	35.0284	29.4533	31.4703	1.07908	0.00727588	0.0498055	15.5353	31.984
ABCB1	507.037	73.4771	69.5717	200.547	491.399	195.864	446.412	1.08128	0.00371647	0.031237	212.658	377.891
GOLGA8B	5167.2	724.637	1213.78	1992.18	7763.3	1472.66	4825.44	1.08288	2.57019e-05	0.000877123	2274.45	4687.13
CAPN5	78.0858	22.8032	17.3929	42.2839	95.0771	60.3792	82.7552	1.08452	0.00473283	0.036646	40.1415	79.4038
CD84	3556.55	2247.39	2016.34	1994.59	5655.59	4513.71	5306.82	1.08667	4.05333e-11	4.17578e-08	2453.72	5158.71
ZNF286B	93.703	25.3369	44.7246	36.2434	158.128	51.5432	113.06	1.09079	9.51477e-06	0.000414166	50.002	107.577
EVL	4333.24	1577.22	1457.28	1843.58	6465.24	2789.22	5207.75	1.09363	7.13274e-08	1.10457e-05	2302.83	4820.74
YES1	314.426	101.348	93.1763	194.506	336.273	245.935	470.889	1.09474	0.00101469	0.0125706	175.864	351.032
KCTD7	1269.16	984.34	674.597	778.025	2100.7	1820.21	2009.44	1.09519	2.90402e-08	5.60818e-06	926.529	1976.78
FMNL3	922.454	344.582	428.611	358.809	1310.06	714.242	1218.02	1.09868	3.4924e-08	6.44131e-06	513.614	1080.77
SPEF2	184.283	41.806	85.7222	83.3598	278.226	92.7778	269.246	1.10245	0.00123581	0.0145126	98.7926	213.416
MFHAS1	712.143	249.569	300.649	337.063	1057.86	531.631	937.115	1.10397	7.50671e-08	1.14095e-05	399.856	842.201
H2AFY2	65.5921	34.2049	27.3317	33.8272	86.0698	85.4145	81.5896	1.10779	0.00055357	0.00804146	40.239	84.358
SLC2A8	28.1109	6.33424	8.69646	19.3298	37.03	25.0353	36.1325	1.10917	0.00534395	0.0400004	15.6178	32.7326
CASP1P2	85.3738	39.2723	40.9976	19.3298	119.097	78.0511	94.4108	1.10949	0.00710029	0.048848	46.2434	97.1862
KIAA1147	3048.47	986.874	1788.99	1414.7	5634.57	2092.65	4348.73	1.11139	3.04675e-10	1.38923e-07	1809.76	4025.32
RNF157	907.878	309.111	209.957	219.876	1029.84	614.101	776.267	1.11187	0.00586507	0.0428652	411.706	806.734
UBAP1L	41.6458	19.0027	43.4823	14.4974	88.0714	54.4885	52.4505	1.11236	0.00206047	0.0209948	29.657	65.0035
PLCXD2	146.801	40.5391	58.3905	100.273	264.214	100.141	199.312	1.11867	6.12733e-07	5.43676e-05	86.5011	187.889
NR3C2	229.052	68.4097	145.355	86.9841	463.376	113.395	363.657	1.11923	3.46872e-05	0.00107635	132.45	313.476
ZNF540	116.608	34.2049	55.9058	22.9541	181.147	72.1605	118.888	1.12281	0.000260005	0.004716	57.4182	124.065
NPTXR	145.76	51.9407	22.3623	41.0758	250.203	64.7972	101.404	1.12482	0.00399117	0.0329387	65.2848	138.801
TMEM116	160.336	150.755	115.539	105.106	315.256	235.626	332.186	1.12912	1.23677e-09	4.31949e-07	132.934	294.356
PCNXL2	367.524	165.957	309.345	253.704	886.719	306.314	704.002	1.12918	3.19693e-05	0.00101645	274.132	632.345
RNF125	3897	1809.06	1149.17	2059.83	5739.66	3301.71	5218.24	1.12925	2.97953e-05	0.000970417	2228.77	4753.2
ZNF831	1199.4	272.372	344.131	382.972	1515.23	690.679	1135.26	1.13049	7.25675e-05	0.00180582	549.718	1113.72
AMIGO1	124.937	24.0701	34.7858	39.8677	170.138	55.9612	121.219	1.13214	0.00273964	0.0254363	55.9152	115.773
IRGQ	1724.14	2238.52	1574.06	1757.8	3923.18	3272.26	4805.63	1.1326	0.000237489	0.00438782	1823.63	4000.36
CCDC85C	36.4401	17.7359	42.2399	15.7055	81.0657	53.0159	52.4505	1.13293	0.000672654	0.00924759	28.0303	62.1774
MAF	729.842	374.987	268.348	376.931	777.631	696.57	1319.42	1.13424	2.38608e-06	0.000151226	437.527	931.207
JUN	799.599	1083.15	1351.68	1229.86	1916.55	2197.21	3098.07	1.13445	0.00213506	0.0215012	1116.07	2403.95
PRR5L	1306.64	500.405	285.741	389.012	1866.51	737.804	1345.06	1.13639	0.00164358	0.0179982	620.448	1316.46
TRPC1	112.444	27.8706	64.6022	32.619	178.144	60.3792	160.848	1.13712	0.00252307	0.0241634	59.3839	133.124
RORA-AS1	89.5384	29.1375	49.694	61.6137	147.119	69.2152	164.345	1.13761	5.86679e-05	0.00156591	57.4959	126.893
TRAF1	1272.28	696.766	715.594	620.97	2440.98	1340.12	1706.39	1.13868	6.26523e-07	5.52923e-05	826.402	1829.16
PHC1	562.218	253.369	252.197	374.515	1111.9	503.651	789.088	1.13953	6.01949e-11	4.49136e-08	360.575	801.547
KIF21A	233.216	70.9434	88.2069	167.928	350.284	215.009	331.021	1.14001	0.000160595	0.00327168	140.074	298.771
FHOD3	23.9463	7.60108	12.4235	18.1217	40.0325	11.7813	53.616	1.14524	0.00198837	0.0204763	15.5232	35.1433
CDH24	27.0698	8.86793	8.69646	14.4974	46.0373	25.0353	25.6424	1.14817	0.00587084	0.0428882	14.7829	32.2384
PI4K2A	1019.28	1029.95	837.345	778.025	1687.37	1999.88	2419.71	1.15022	0.000171259	0.00344512	916.149	2035.65
C9orf41-AS1	13.5349	1.26685	13.6659	13.2892	27.0219	16.1993	26.808	1.15108	0.0035202	0.0300958	10.4392	23.3431
DUOX1	88.4973	22.8032	27.3317	30.2028	128.104	53.0159	88.583	1.15345	0.00113805	0.0136858	42.2088	89.9009
C21orf140	26.0286	13.9353	7.45411	16.9136	36.0292	23.5626	47.7882	1.15594	0.0023181	0.022846	16.0829	35.7933
ARL10	79.127	21.5364	37.2705	21.746	127.103	50.0705	88.583	1.15804	2.28109e-05	0.0008018	39.92	88.5855
ATP8B2	3232.75	1109.76	911.886	2523.75	5769.68	2234.03	4842.93	1.15978	5.03503e-07	4.80524e-05	1944.54	4282.21
ZSWIM5	98.9087	22.8032	36.0282	33.8272	165.134	50.0705	104.901	1.16447	0.00579064	0.0424914	47.8918	106.702
MLLT3	521.613	225.499	108.085	217.46	797.647	340.185	620.081	1.16581	0.000130106	0.00282873	268.164	585.971
NFKBIZ	12583.3	30745.1	26475.7	19447	24851.2	80258.7	47698.5	1.16641	0.00703906	0.0486751	22312.8	50936.1
THEM4	1023.44	239.434	289.468	440.961	1483.2	460.944	1317.09	1.16904	0.000384211	0.00625056	498.327	1087.08
CRTAM	136.39	39.2723	49.694	55.5732	214.174	119.286	120.053	1.16942	0.00265752	0.0249276	70.2323	151.171
PRH2	24.9875	10.1348	11.1812	12.0811	38.0308	17.672	43.1259	1.16993	0.00480852	0.0370746	14.5961	32.9429
RAB3A	41.6458	53.2076	73.2987	30.2028	103.084	106.032	123.55	1.17012	0.00300874	0.0270177	49.5887	110.888
C17orf100	43.7281	15.2022	24.847	14.4974	75.0609	30.9259	62.9406	1.17177	0.00160383	0.0177046	24.5686	56.3091
SNORD26	16.6583	5.06739	11.1812	10.873	33.0268	16.1993	25.6424	1.17582	0.00249635	0.0239915	10.945	24.9562
AP3M2	1222.3	557.413	484.517	593.183	1841.49	1139.84	1775.16	1.17615	1.98072e-05	0.000720919	714.354	1585.5
ADTRP	903.713	243.235	118.023	128.06	989.803	512.487	547.816	1.17874	0.00367988	0.0310248	348.258	683.368
LOC101927066	103.073	179.892	161.506	154.638	303.246	371.111	315.868	1.18025	4.08781e-05	0.00119576	149.777	330.075
ANKRD20A5P	66.6332	30.4043	32.3011	50.7407	105.085	73.6332	125.881	1.18318	0.000404327	0.00645624	45.0199	101.533
LOC148696	348.783	205.229	283.256	326.19	776.63	589.065	624.743	1.18387	0.000189338	0.00371323	290.865	663.479
PASK	705.896	207.763	354.07	300.82	1198.97	460.944	1043.18	1.18432	2.04067e-07	2.39268e-05	392.137	901.032
THEM5	112.444	51.9407	48.4517	74.903	180.146	69.2152	251.762	1.18448	0.000312343	0.00540264	71.9347	167.041
CD247	4404.04	951.402	616.206	1577.8	5143.17	2052.89	3932.62	1.18478	0.000406081	0.00646933	1887.36	3709.56
SBK1	246.751	44.3396	37.2705	71.2786	278.226	120.758	188.822	1.18647	0.00388118	0.0322907	99.91	195.935
NLRC3	2653.88	794.313	700.686	921.79	3215.61	1861.45	2878.95	1.18681	2.21298e-06	0.000143016	1267.67	2652
SIGLEC17P	70.7978	46.8733	47.2093	114.771	120.097	128.122	231.948	1.18681	0.00260703	0.0246972	69.9128	160.056
TIAM1	1179.62	506.739	570.239	639.092	1980.61	1097.13	1813.62	1.18746	0.00591137	0.0430693	723.922	1630.45
TSEN54	699.649	183.693	163.99	349.145	944.766	471.252	790.254	1.18777	0.000420991	0.00667043	349.119	735.424
MIR2355	14.576	8.86793	17.3929	22.9541	42.0341	30.9259	34.967	1.18877	0.00182884	0.0193132	15.9478	35.9757
ZNF573	130.143	53.2076	74.5411	60.4056	240.195	110.45	202.808	1.19043	3.9909e-07	4.13901e-05	79.5743	184.484
SNORA38B	15.6172	16.469	13.6659	18.1217	41.0333	26.5079	40.7948	1.19084	0.000397197	0.00637964	15.9684	36.112
ABLIM1	5294.22	1978.82	1622.51	1360.33	9199.46	3074.92	5337.13	1.19178	0.00010969	0.00247329	2563.97	5870.5
PLK3	3942.81	4878.63	3698.48	4397.53	8161.62	13591.2	8514.46	1.19434	0.00264604	0.0248642	4229.36	10089.1
SLC14A1	363.359	106.415	91.934	155.847	543.441	204.7	441.749	1.19686	5.37348e-05	0.00146036	179.389	396.63
GAREML	29.152	10.1348	28.5741	8.45679	60.0487	25.0353	48.9538	1.19863	0.000358466	0.00594967	19.0794	44.6792
EPHA1	144.719	92.4798	100.63	101.481	389.316	173.774	209.802	1.19989	0.000168246	0.00339431	109.828	257.631
ACSM3	56.2218	34.2049	21.12	41.0758	88.0714	73.6332	100.239	1.20011	1.49132e-06	0.00010417	38.1556	87.3144
LOC100129203	57.2629	22.8032	26.0894	22.9541	94.0763	50.0705	79.2585	1.20804	6.34476e-06	0.000312009	32.2774	74.4684
ROBO3	144.719	29.1375	16.1506	28.9947	176.143	72.1605	68.7684	1.20982	0.00328683	0.0287597	54.7505	105.691
FAM84B	504.955	219.165	170.202	161.887	876.711	372.584	566.465	1.21065	0.00407737	0.0332654	264.052	605.253
DOCK9	1066.13	475.068	310.588	426.464	2017.64	740.75	1222.68	1.21453	4.45819e-05	0.00126831	569.563	1327.02
CDHR1	40.6046	7.60108	23.6047	28.9947	46.0373	38.2892	88.583	1.21498	0.00346804	0.0298089	25.2013	57.6365
NPR2	108.279	22.8032	32.3011	39.8677	135.11	80.9965	111.894	1.21627	1.42999e-05	0.00056156	50.8128	109.333
MKRN2OS	29.152	5.06739	16.1506	6.04056	41.0333	19.1446	36.1325	1.21669	0.00294608	0.0267035	14.1026	32.1035
GIPR	185.324	44.3396	94.4187	95.4409	258.209	176.72	271.577	1.21685	0.000128514	0.00280899	104.881	235.502
APBB1	546.601	154.555	146.597	141.349	1053.85	265.079	405.617	1.21776	3.5587e-05	0.00108782	247.276	574.85
DHRS3	277.986	77.2777	52.1787	83.3598	365.296	159.048	261.087	1.21885	0.00327501	0.0287329	122.7	261.81
DYRK2	3167.16	947.602	1094.51	1232.27	4851.94	2248.76	3662.21	1.21895	1.20948e-05	0.000500091	1610.39	3587.63
SCART1	70.7978	19.0027	43.4823	45.9083	121.098	42.7072	165.51	1.2193	0.000424672	0.00670521	44.7978	109.772
LMO7	331.084	91.213	135.416	158.263	588.477	257.716	368.319	1.21939	6.91701e-06	0.000329109	178.994	404.837
SKAP1	1092.16	235.634	247.228	331.023	1104.9	780.511	981.406	1.22685	6.89245e-06	0.000328894	476.511	955.605
MTRNR2L9	133.266	58.275	34.7858	82.1517	217.176	142.848	157.351	1.22719	0.00313004	0.0278028	77.1197	172.459
SNORD50B	15.6172	20.2696	14.9082	22.9541	52.0422	38.2892	39.6292	1.22924	0.000960358	0.0120246	18.4373	43.3202
SAMD3	2110.4	366.119	181.383	665.67	1727.4	1079.46	1757.67	1.22936	0.00294284	0.0267035	830.893	1521.51
MTUS1	38.5223	17.7359	28.5741	15.7055	95.0771	42.7072	40.7948	1.23289	0.00510989	0.0388688	25.1344	59.5264
PWARSN	92.6619	40.5391	45.967	77.3192	227.184	79.5238	165.51	1.23751	1.49929e-08	3.32579e-06	64.1218	157.406
LOC100505658	51.0161	82.3451	77.0258	114.771	158.128	200.282	201.643	1.23759	2.8383e-05	0.000943131	81.2894	186.684
DNAH3	22.9052	12.6685	22.3623	9.6649	50.0406	39.7619	30.3047	1.24051	0.00332758	0.0289963	16.9002	40.0357
MCAT	54.1395	58.275	48.4517	78.5273	220.179	55.9612	159.683	1.24673	0.00198047	0.02042	59.8484	145.274
LOC100507487	49.9749	15.2022	13.6659	10.873	65.0528	41.2346	41.9604	1.24758	0.00708861	0.048848	22.429	49.4159
SPOCK2	4215.59	1776.12	1039.85	1432.82	7142.79	3067.56	4567.85	1.24832	8.87364e-06	0.00039798	2116.1	4926.07
NOTCH4	17.6995	21.5364	13.6659	15.7055	41.0333	32.3986	48.9538	1.24981	0.00242624	0.023487	17.1518	40.7952
ERI3-IT1	23.9463	13.9353	36.0282	35.0353	85.069	51.5432	62.9406	1.25002	0.00055981	0.00809628	27.2363	66.5176
CACNA1I	731.925	135.553	175.171	169.136	1161.94	316.623	511.683	1.2504	0.00416723	0.0336805	302.946	663.416
HOOK1	167.624	48.1402	104.357	80.9435	373.303	95.7231	308.875	1.2543	0.000155629	0.00320936	100.266	259.3
PMEL	87.4561	26.6038	42.2399	31.4109	223.181	48.5979	87.4174	1.25611	0.00271324	0.0252912	46.9277	119.732
CD40LG	171.789	111.483	23.6047	99.0652	472.383	91.3051	263.418	1.25712	0.00355699	0.0302999	101.485	275.702
NFATC2	2490.42	400.324	519.303	954.409	2839.3	1335.71	2582.89	1.26125	3.74641e-06	0.00021206	1091.11	2252.63
ZAP70	2192.65	431.995	421.157	649.965	3110.52	1184.02	1567.69	1.26309	0.00308446	0.0275171	923.942	1954.08
IRGM	36.4401	10.1348	14.9082	9.6649	56.0455	22.0899	48.9538	1.2645	0.00387311	0.0322563	17.787	42.3631
PRKCA	2198.9	931.133	603.783	1238.32	3500.84	1833.47	3346.34	1.26811	0.000143333	0.00302417	1243.03	2893.55
MATK	258.204	51.9407	32.3011	85.776	240.195	159.048	244.769	1.26895	0.00291733	0.0265602	107.055	214.67
FAM124B	29.152	30.4043	14.9082	36.2434	45.0365	82.4691	75.7618	1.27249	6.0844e-05	0.00159545	27.677	67.7558
STMN3	297.767	125.418	166.475	83.3598	733.595	281.279	241.272	1.27602	0.00598721	0.0434124	168.255	418.715
RCAN3	1115.07	521.941	403.764	462.707	2254.83	865.926	1463.95	1.27626	0.000523902	0.00775001	625.869	1528.24
ZNF483	82.2504	34.2049	64.6022	47.1164	201.163	79.5238	149.192	1.27685	7.46988e-06	0.00034736	57.0435	143.293
ZNF208	209.27	57.0081	63.3599	83.3598	396.321	100.141	268.08	1.27772	0.00520216	0.0391828	103.249	254.848
LOC100506985	561.177	198.895	114.296	167.928	818.664	304.841	690.015	1.28001	0.00204148	0.0208401	260.574	604.507
SLFN12L	804.805	254.636	202.503	552.107	1323.07	640.608	1220.35	1.28274	0.000153049	0.00317231	453.513	1061.34
LINC01012	19.7817	6.33424	28.5741	9.6649	52.0422	29.4533	38.4637	1.2844	0.00439128	0.034789	16.0887	39.9864
ZNF662	114.526	48.1402	32.3011	30.2028	207.168	108.977	75.7618	1.28657	0.00595859	0.0432789	56.2925	130.636
USP51	22.9052	2.53369	9.93881	13.2892	33.0268	25.0353	26.808	1.29155	0.00673607	0.0472654	12.1667	28.29
LDOC1	30.1932	10.1348	8.69646	24.1623	49.0398	27.9806	53.616	1.29705	0.00718306	0.0493141	18.2967	43.5455
GPR19	54.1395	12.6685	11.1812	20.5379	62.0503	47.1252	57.1127	1.30039	0.00299237	0.0269445	24.6318	55.4294
LCK	2676.78	700.566	350.343	518.28	3448.8	1360.74	2066.55	1.30112	0.000609143	0.00863478	1061.49	2292.03
DSEL	137.431	34.2049	27.3317	77.3192	213.173	75.1058	200.477	1.30373	1.35146e-06	9.60353e-05	69.0717	162.919
CRHR1-IT1	123.896	53.2076	70.814	66.4462	229.186	110.45	252.928	1.30641	3.99744e-08	7.05569e-06	78.591	197.521
DOK6	340.454	79.8114	50.9364	177.593	444.36	232.681	396.292	1.30919	0.00220973	0.0220548	162.199	357.778
SGSM1	106.197	21.5364	11.1812	27.7866	110.089	66.2698	81.5896	1.30929	0.00472797	0.0366256	41.6752	85.9829
ZNF781	35.3989	6.33424	16.1506	24.1623	53.043	23.5626	74.5962	1.31151	0.000154117	0.00318935	20.5115	50.4006
TSHZ2	497.667	96.2804	106.842	141.349	724.588	207.645	514.015	1.31222	0.00248895	0.0239345	210.535	482.083
TIGIT	766.282	148.221	118.023	250.079	774.628	447.69	797.247	1.31255	0.000440645	0.00686563	320.652	673.188
CABP4	49.9749	6.33424	40.9976	14.4974	62.0503	51.5432	81.5896	1.31503	0.00294526	0.0267035	27.951	65.061
KCNA3	3634.64	1682.37	1108.18	3309.02	7191.83	3665.46	7190.38	1.31925	1.01291e-05	0.000432993	2433.55	6015.89
RTKN2	309.22	183.693	268.348	375.723	530.43	312.205	1413.83	1.31999	0.00581908	0.0426239	284.246	752.155
CD200R1	103.073	41.806	69.5717	35.0353	172.14	91.3051	217.961	1.33181	0.000719511	0.00969686	62.3715	160.469
ANO9	473.721	211.563	166.475	146.182	944.766	400.564	529.167	1.33267	0.00015921	0.00325907	249.485	624.832
SYTL2	995.334	250.836	139.143	465.123	1372.11	715.714	1030.36	1.34312	0.000522838	0.00774584	462.609	1039.4
ZNF793	162.419	27.8706	77.0258	57.9894	272.221	116.34	209.802	1.34407	1.25134e-06	9.2111e-05	81.3261	199.454
TGFBR3	1816.8	292.642	188.837	782.857	1956.59	977.848	1932.51	1.3487	0.00317976	0.0281379	770.283	1622.31
CACNA2D3	32.2755	87.4124	18.6353	68.8624	86.0698	98.6684	192.318	1.34985	0.00328541	0.0287597	51.7964	125.686
CD69	3396.21	1824.26	3084.76	1819.42	5959.83	4635.94	8549.43	1.35078	8.36635e-05	0.00201074	2531.16	6381.73
MYBL1	1918.83	473.801	340.404	894.003	2828.29	1004.36	2686.63	1.35274	0.000427993	0.00673586	906.759	2173.09
KLHL3	433.116	127.952	180.141	113.563	926.752	256.243	500.028	1.35832	3.43728e-06	0.000198672	213.693	561.008
SH2D1A	928.701	228.032	70.814	167.928	1027.83	497.76	730.81	1.35858	0.00585725	0.0428271	348.869	752.135
ARL4C	4787.18	1252.91	808.77	1894.32	5612.55	3023.38	6401.29	1.35929	0.000375134	0.00615167	2185.8	5012.41
GAMT	18.7406	3.80054	13.6659	2.41623	29.0235	22.0899	22.1458	1.36293	0.00481758	0.037127	9.65581	24.4197
CLUHP3	249.875	59.5418	121.75	124.436	523.425	142.848	435.922	1.36384	0.000209774	0.00399934	138.901	367.398
NAP1L3	138.472	31.6712	36.0282	26.5785	192.156	88.3598	136.371	1.36946	0.00403697	0.0331666	58.1875	138.962
FAAH2	92.6619	19.0027	9.93881	36.2434	118.096	39.7619	113.06	1.37153	0.00148236	0.0167121	39.4617	90.3059
FAM102A	1063.01	205.229	282.014	311.693	2007.63	488.924	1002.39	1.37196	1.10021e-06	8.32253e-05	465.486	1166.31
CD5	991.169	291.375	198.776	152.222	1655.34	581.702	719.154	1.37464	0.000566715	0.00818894	408.386	985.4
FLJ33360	6.24687	11.4016	3.72705	13.2892	13.0106	41.2346	17.4835	1.3757	0.0057717	0.0424462	8.6662	23.9095
LOC101928150	659.044	225.499	99.3881	173.968	1129.92	353.439	680.69	1.37659	0.00123496	0.0145126	289.475	721.349
TAS2R4	40.6046	10.1348	4.9694	8.45679	59.0479	19.1446	36.1325	1.37769	0.0013146	0.0151966	16.0414	38.1084
CCDC136	120.773	46.8733	57.1481	70.0705	242.196	126.649	203.974	1.3801	3.68317e-08	6.63563e-06	73.7162	190.94
GPR174	346.701	84.8788	137.901	118.395	515.418	259.189	510.518	1.38171	6.41527e-07	5.55689e-05	171.969	428.375
KIF5C	185.324	46.8733	73.2987	47.1164	371.301	94.2504	245.934	1.38898	9.42253e-05	0.00219599	88.153	237.162
PLN	12.4937	13.9353	7.45411	7.24868	23.0187	30.9259	27.9736	1.3892	0.00104332	0.012757	10.283	27.3061
VSIG1	196.776	48.1402	37.2705	209.003	439.356	135.485	372.981	1.38999	0.00147865	0.0166932	122.798	315.941
CXCL5	1076.54	316.712	214.927	389.012	1436.16	681.843	1516.4	1.39031	1.90613e-05	0.000706301	499.299	1211.47
PWAR5	254.039	78.5445	202.503	167.928	702.57	250.353	498.862	1.39074	3.35142e-10	1.44773e-07	175.754	483.928
COL10A1	44.7692	22.8032	16.1506	47.1164	70.0568	72.1605	111.894	1.392	7.3388e-05	0.00181699	32.7099	84.7039
P2RY10	312.343	91.213	280.771	206.587	810.657	262.134	833.38	1.39319	4.10255e-05	0.00119576	222.729	635.39
LOC101927051	139.513	198.895	146.597	124.436	359.291	491.869	360.16	1.39943	2.86219e-05	0.000947235	152.36	403.774
CD3G	645.51	186.227	79.5105	113.563	767.623	353.439	650.386	1.39968	0.000520995	0.00772551	256.202	590.482
PTPN13	30.1932	13.9353	32.3011	50.7407	67.0544	72.1605	115.391	1.39977	0.00148193	0.0167121	31.7926	84.8686
PYHIN1	1186.9	207.763	168.96	385.388	1183.96	745.168	1188.88	1.40028	0.000113221	0.00253551	487.254	1039.33
SNORD11	40.6046	15.2022	23.6047	38.6596	63.0511	67.7425	94.4108	1.40255	4.3844e-05	0.00125703	29.5178	75.0682
PLCG1	3650.25	1223.77	888.281	995.485	6405.19	2608.09	3741.47	1.40393	6.42494e-07	5.55689e-05	1689.45	4251.58
ADGRD1	34.3578	26.6038	11.1812	25.3704	48.039	79.5238	66.4373	1.40442	0.000469053	0.00720058	24.3783	64.6667
GOLGA7B	425.828	88.6793	78.2681	86.9841	582.472	215.009	386.968	1.40461	0.000797997	0.0104542	169.94	394.816
TRIM2	71.839	24.0701	62.1175	26.5785	207.168	51.5432	152.689	1.40487	0.000399464	0.00640352	46.1513	137.133
PRKX-AS1	21.864	8.86793	14.9082	12.0811	51.0414	17.672	48.9538	1.40488	0.00240462	0.023354	14.4303	39.2224
LINC00987	181.159	26.6038	24.847	67.6543	247.2	66.2698	227.285	1.40628	0.00274286	0.0254363	75.0661	180.252
JAKMIP1	113.485	49.407	16.1506	76.1111	152.123	101.614	229.616	1.40721	0.00318543	0.0281577	63.7884	161.118
TIPARP-AS1	17.6995	10.1348	8.69646	19.3298	40.0325	42.7072	27.9736	1.40973	0.000319272	0.00547061	13.9651	36.9044
KLF12	2470.64	657.494	898.22	1359.13	4106.33	1842.3	4472.28	1.41609	1.58402e-10	8.52066e-08	1346.37	3473.64
CD3D	2064.59	753.774	270.833	337.063	2420.96	1437.32	2299.66	1.41692	0.000470979	0.00721187	856.565	2052.65
ACSL6	331.084	111.483	54.6634	80.9435	530.43	210.591	342.676	1.41889	0.00407659	0.0332654	144.543	361.232
TC2N	2961.01	1207.31	711.867	1325.3	4900.97	2453.46	4701.89	1.41906	5.22799e-06	0.000273304	1551.37	4018.77
ANK3	414.375	95.0135	99.3881	137.725	578.469	244.462	555.975	1.42019	2.89315e-05	0.000953634	186.625	459.635
GPR82	16.6583	21.5364	21.12	18.1217	23.0187	64.7972	72.2651	1.42405	0.0034977	0.0299816	19.3591	53.3603
CTD-2201I18.1	112.444	53.2076	40.9976	66.4462	226.183	120.758	200.477	1.42441	4.10542e-06	0.000225505	68.2737	182.473
CCDC64	372.73	120.35	86.9646	85.776	630.511	281.279	354.332	1.42926	5.10101e-05	0.00140022	166.455	422.041
PRKCQ-AS1	1072.38	395.256	243.501	349.145	2042.66	726.023	1298.44	1.43006	1.92931e-05	0.000711678	515.07	1355.71
CTLA4	684.032	272.372	108.085	202.963	762.619	650.917	840.373	1.43161	7.72909e-05	0.00189081	316.863	751.303
LINC01032	9.3703	17.7359	6.21175	10.873	26.0211	33.8713	29.1391	1.44035	0.00545769	0.0406479	11.0477	29.6772
MID2	189.488	48.1402	98.1457	47.1164	384.312	97.1958	325.193	1.44099	9.84406e-05	0.00226904	95.7226	268.9
LINC00161	23.9463	5.06739	4.9694	9.6649	40.0325	23.5626	18.6491	1.44226	0.00442694	0.0349703	10.912	27.4147
IFNG	178.036	38.0054	23.6047	44.7002	128.104	187.028	139.868	1.44457	0.000895798	0.0114025	71.0865	151.667
NR4A2	1574.21	1739.38	2202.69	1492.02	4184.39	3421	6294.06	1.45209	0.000648976	0.00904917	1752.07	4633.15
BCL11B	5398.33	1368.19	826.163	1296.3	7660.21	2768.61	5923.41	1.45273	4.0988e-05	0.00119576	2222.25	5450.74
PFN1P2	81.2093	64.6092	17.3929	54.3651	170.138	120.758	137.537	1.45486	0.00691972	0.0480691	54.3941	142.811
GPRIN3	1886.55	839.92	713.109	1413.49	3290.67	2469.66	3890.66	1.45711	1.24701e-07	1.67608e-05	1213.27	3216.99
LINC01163	64.551	11.4016	17.3929	20.5379	100.081	50.0705	67.6028	1.45949	0.00233661	0.0229189	28.4709	72.5848
AGAP1	193.653	22.8032	21.12	57.9894	252.205	80.9965	166.676	1.45991	0.00387606	0.0322645	73.8914	166.626
FAM184A	111.402	24.0701	19.8776	12.0811	146.119	66.2698	85.0863	1.46664	0.00317742	0.0281324	41.8578	99.1582
GPRASP1	1395.13	476.334	511.849	584.726	3139.55	1064.74	2086.36	1.46683	1.72403e-07	2.15694e-05	742.011	2096.88
PNMA3	399.799	39.2723	58.3905	132.892	640.519	132.54	365.988	1.46712	0.000147647	0.0031041	157.589	379.682
SLC29A1	213.435	172.291	105.6	192.09	350.284	437.381	632.902	1.46919	0.000555792	0.00805236	170.854	473.522
CD3E	4827.79	1641.83	736.714	1326.51	6407.2	3827.45	5734.58	1.47168	2.35812e-05	0.000821839	2133.21	5323.08
PTPRM	172.83	55.7413	29.8164	26.5785	305.248	117.813	107.232	1.47375	0.00561118	0.0416211	71.2415	176.764
IL21R	221.764	27.8706	62.1175	53.157	305.248	134.012	226.12	1.47471	8.43184e-07	7.02582e-05	91.2272	221.793
CACNA1C-AS1	55.1807	20.2696	24.847	24.1623	131.106	48.5979	82.7552	1.47546	2.61593e-07	2.88191e-05	31.1149	87.4865
CD2	2254.08	508.006	280.771	415.591	2403.95	1447.63	2123.66	1.4811	0.000125037	0.00274879	864.611	1991.75
CYP4F35P	117.649	30.4043	21.12	73.6949	152.123	125.176	191.153	1.4861	6.45735e-05	0.00165621	60.7171	156.151
ANKRD42	686.114	537.143	464.639	411.966	1470.19	1285.63	1663.26	1.48646	5.54518e-07	5.06005e-05	524.966	1473.03
CA6	306.096	74.744	19.8776	48.3245	407.33	157.575	208.636	1.48698	0.00574767	0.0424227	112.261	257.847
IKZF2	1080.71	292.642	209.957	791.314	1523.24	749.586	2445.36	1.49375	3.20756e-05	0.00101645	593.655	1572.73
WNT10B	87.4561	21.5364	24.847	26.5785	139.113	83.9418	96.742	1.49436	0.00030123	0.00526031	40.1045	106.599
LOC284454	1583.58	3353.34	1836.19	1483.56	4402.57	6208.75	6133.21	1.4945	2.52948e-05	0.000867912	2064.17	5581.51
LOC102723604	201.982	206.496	186.353	401.093	823.668	491.869	783.26	1.49827	0.00280463	0.0257964	248.981	699.599
LOC286059	135.349	155.822	62.1175	196.922	536.435	298.951	322.862	1.49948	0.00402666	0.0331316	137.553	386.082
LOC101929719	15.6172	22.8032	13.6659	8.45679	39.0317	35.3439	51.2849	1.5011	0.000237902	0.00438782	15.1358	41.8868
CD96	2866.27	618.221	530.484	884.338	3779.06	1882.06	3396.46	1.50114	5.99533e-07	5.34855e-05	1224.83	3019.2
CPAMD8	44.7692	36.7386	38.5129	30.2028	139.113	73.6332	108.398	1.51064	0.000135533	0.00292093	37.5559	107.048
ADAMTS10	205.105	34.2049	24.847	78.5273	296.24	107.504	223.789	1.51304	0.000949247	0.0119291	85.6712	209.178
DPP4	982.84	310.378	197.534	165.511	1731.4	690.679	820.558	1.51309	0.000653523	0.00908348	414.066	1080.88
GPR171	249.875	69.6766	95.661	61.6137	352.286	247.407	349.67	1.51382	9.97238e-07	7.79204e-05	119.207	316.454
GATA3	239.463	65.876	31.0588	78.5273	343.278	141.376	320.531	1.51708	1.0507e-06	8.05945e-05	103.731	268.395
RASGRP1	2537.27	865.257	617.448	1170.66	4641.76	2214.89	3761.28	1.52063	1.40915e-07	1.86542e-05	1297.66	3539.31
HLF	21.864	5.06739	19.8776	13.2892	39.0317	27.9806	64.1061	1.52436	0.00255748	0.0243793	15.0246	43.7061
CAMK2N1	22.9052	12.6685	11.1812	7.24868	40.0325	17.672	60.6094	1.52503	0.000247349	0.00452143	13.5009	39.4379
FBLN7	36.4401	2.53369	12.4235	18.1217	75.0609	23.5626	44.2915	1.52822	0.00238986	0.023254	17.3797	47.6383
LEF1	3181.74	648.626	403.764	674.127	4646.77	1624.35	2767.05	1.54155	0.00022231	0.00417053	1227.06	3012.72
ITK	5155.75	1265.58	873.373	1702.23	8467.87	3248.69	5901.26	1.54471	7.87846e-08	1.18647e-05	2249.23	5872.61
INADL	507.037	225.499	237.289	209.003	1150.93	513.959	967.42	1.55241	1.49354e-13	3.90071e-10	294.707	877.438
GCSAM	171.789	25.3369	38.5129	97.8571	268.218	80.9965	347.339	1.55502	6.98205e-05	0.00175495	83.3739	232.184
AMPD2	11442.2	5823.7	5542.13	7961.46	31150.3	18190.3	19377.5	1.55616	0.00114003	0.0136995	7692.37	22906
LINC01550	159.295	31.6712	31.0588	22.9541	260.211	73.6332	155.02	1.55867	0.000297471	0.00520574	61.2448	162.955
PAPPA	11.4526	5.06739	2.4847	4.83245	21.017	13.254	18.6491	1.55872	0.00148638	0.0167231	5.95928	17.64
NMT2	543.477	116.55	144.113	192.09	974.791	309.259	814.731	1.55991	5.82934e-11	4.49136e-08	249.057	699.593
STXBP1	57.2629	20.2696	8.69646	9.6649	77.0625	51.5432	68.7684	1.56313	0.000425789	0.00671405	23.9735	65.7914
SRGAP3	45.8104	29.1375	23.6047	27.7866	90.0731	69.2152	121.219	1.56661	1.21638e-05	0.000500423	31.5848	93.5024
LGR6	161.377	40.5391	23.6047	117.187	217.176	132.54	334.517	1.56913	0.00213113	0.0214748	85.677	228.078
MORC4	143.678	48.1402	33.5435	14.4974	222.18	103.086	176	1.58087	2.70822e-05	0.00091097	59.9647	167.089
CCDC141	60.3864	21.5364	21.12	12.0811	147.119	48.5979	67.6028	1.5818	7.88685e-06	0.000361627	28.781	87.7733
CDHR3	69.7567	22.8032	7.45411	30.2028	120.097	44.1799	113.06	1.58328	5.1238e-05	0.00140413	32.5542	92.4457
OBSCN	292.562	83.6119	139.143	88.1922	892.724	237.099	292.557	1.58345	0.0011568	0.0138735	150.877	474.127
KLRB1	2325.92	287.574	201.261	478.413	1884.53	1142.79	2087.53	1.58807	0.000439684	0.00686065	823.291	1704.95
ACVR1C	191.571	65.876	40.9976	71.2786	507.412	103.086	280.901	1.59064	0.000939756	0.0118662	92.4307	297.133
RORA	5258.82	1467.01	1181.48	2383.61	8554.94	4339.94	8653.16	1.59093	1.42309e-07	1.8688e-05	2572.73	7182.68
CD6	2248.87	601.752	327.981	320.15	3945.2	1381.36	1705.22	1.59138	0.000325104	0.00553587	874.689	2343.93
RRP12	2583.08	2371.54	1551.7	1937.81	6647.39	7621.03	5635.51	1.59373	0.000160644	0.00327168	2111.03	6634.64
ALS2CL	272.78	148.221	63.3599	71.2786	852.692	198.81	290.226	1.59431	0.00105135	0.0128121	138.91	447.242
SLC5A5	19.7817	7.60108	4.9694	3.62434	33.0268	19.1446	25.6424	1.60289	0.00464186	0.0362149	8.99414	25.938
MTMR8	30.1932	12.6685	26.0894	12.0811	85.069	42.7072	59.4439	1.60479	6.23635e-08	9.9388e-06	20.258	62.4067
PPEF2	11.4526	10.1348	1.24235	8.45679	21.017	19.1446	31.4703	1.61138	0.00119708	0.014182	7.82163	23.8773
OXNAD1	1485.71	515.607	458.427	649.965	3838.11	1300.36	2035.08	1.62065	1.94561e-09	6.5178e-07	777.428	2391.18
A2M-AS1	59.3452	6.33424	11.1812	21.746	103.084	19.1446	94.4108	1.62631	0.000810235	0.0105556	24.6517	72.213
TESPA1	1715.81	509.273	357.797	467.54	3274.66	1070.63	2417.38	1.63649	2.10388e-06	0.000137126	762.604	2254.22
EPHX2	342.537	145.687	53.4211	131.684	638.518	276.861	586.28	1.6374	1.91175e-05	0.000706787	168.332	500.553
LOC221946	34.3578	29.1375	49.694	59.1975	136.11	108.977	150.358	1.64176	0.000193602	0.00377431	43.0967	131.815
NAP1L2	87.4561	7.60108	31.0588	35.0353	124.101	51.5432	180.663	1.64382	0.00154973	0.0172467	40.2878	118.769
CD8A	1761.62	340.782	150.324	368.474	1818.47	1611.09	1762.34	1.64687	0.00702097	0.0485873	655.299	1730.63
TRAT1	767.323	292.642	167.717	221.085	1562.27	662.698	997.724	1.64874	1.03708e-06	8.03004e-05	362.192	1074.23
WDR86-AS1	54.1395	20.2696	17.3929	18.1217	107.087	48.5979	95.5764	1.64922	0.00338723	0.0293566	27.4809	83.7537
SALL2	40.6046	6.33424	8.69646	9.6649	67.0544	23.5626	52.4505	1.65313	3.8279e-05	0.00114662	16.3251	47.6892
KCNA6	24.9875	7.60108	4.9694	4.83245	18.0146	23.5626	55.9472	1.66212	0.0067737	0.0473957	10.5976	32.5081
TCEA3	108.279	45.6065	21.12	30.2028	256.208	92.7778	135.206	1.66388	0.000142376	0.00301562	51.3021	161.397
FAAHP1	39.5635	12.6685	17.3929	12.0811	80.0649	23.5626	94.4108	1.67182	0.00257581	0.0244971	20.4265	66.0128
G0S2	2061.47	1838.2	872.13	1790.42	4216.42	7747.68	5627.35	1.67597	0.00475164	0.0367577	1640.55	5863.82
C21orf62	15.6172	3.80054	6.21175	3.62434	43.0349	8.83598	19.8146	1.68476	0.00425225	0.0340662	7.31345	23.8952
LOC100132111	36.4401	13.9353	22.3623	27.7866	76.0617	42.7072	127.047	1.68672	3.15488e-05	0.00101147	25.1311	81.9385
TNFRSF25	814.175	328.113	195.049	212.628	1934.57	637.663	1127.1	1.68861	4.18904e-05	0.00121084	387.491	1233.11
ABCD2	297.767	93.7467	69.5717	147.39	615.499	254.771	543.154	1.68948	1.1227e-10	7.06486e-08	152.119	471.141
LOC100507506	7.28801	3.80054	2.4847	10.873	25.0203	17.672	16.3179	1.69297	0.00273164	0.0254051	6.11157	19.6701
RASGRF2	616.357	172.291	105.6	155.847	1219.99	344.603	848.532	1.69505	0.0011222	0.0135249	262.524	804.375
LOC101929241	65.5921	11.4016	7.45411	13.2892	90.0731	32.3986	85.0863	1.70779	0.00176822	0.0188598	24.4343	69.186
IL1B	332.125	1668.44	1149.17	541.234	798.648	3110.26	3643.56	1.70856	0.00404017	0.0331763	922.743	2517.49
TRABD2A	1365.98	342.049	258.409	256.12	3082.5	690.679	1511.74	1.71358	9.89236e-05	0.00227427	555.64	1761.64
TBC1D4	1551.31	482.669	275.802	501.367	2988.42	1047.06	2444.19	1.71453	5.78497e-07	5.2176e-05	702.786	2159.89
RNF157-AS1	78.0858	40.5391	22.3623	19.3298	141.114	101.614	143.365	1.71875	0.000390153	0.00630955	40.0793	128.698
LRRN3	26.0286	22.8032	7.45411	26.5785	51.0414	25.0353	135.206	1.71962	0.00470867	0.0365403	20.7161	70.4274
ADORA2A-AS1	179.077	255.903	296.922	239.206	500.406	1210.53	786.757	1.7197	0.00154007	0.0171602	242.777	832.564
LINC00612	35.3989	1.26685	4.9694	10.873	74.0601	11.7813	33.8014	1.72053	0.00381243	0.0318803	13.127	39.8809
KIAA1671	139.513	26.6038	16.1506	54.3651	155.126	120.758	223.789	1.72681	0.000285184	0.00503364	59.1582	166.558
TNF	146.801	430.728	274.56	173.968	631.512	1051.48	727.313	1.73444	0.000140522	0.00298733	256.514	803.436
TCF7	3862.65	829.785	580.178	735.741	7408.01	1865.86	4434.98	1.74038	0.000344143	0.00577028	1502.09	4569.62
CD8B	571.588	87.4124	33.5435	113.563	561.455	469.78	553.644	1.74309	0.00644353	0.0457288	201.527	528.293
LOC101929125	33.3166	21.5364	17.3929	51.9488	38.0308	67.7425	198.146	1.74847	0.00660973	0.0467063	31.0487	101.307
SATB1-AS1	162.419	34.2049	19.8776	31.4109	275.223	85.4145	184.159	1.75381	0.000317215	0.00545511	61.978	181.599
ASAH2B	5.20572	6.33424	3.72705	1.20811	11.0089	16.1993	15.1524	1.76231	0.00264622	0.0248642	4.11878	14.1202
DBNDD1	31.2343	2.53369	1.24235	7.24868	54.0438	7.36332	25.6424	1.76374	0.0037772	0.031618	10.5648	29.0165
MIR342	11.4526	5.06739	3.72705	8.45679	37.03	8.83598	30.3047	1.76891	0.00105031	0.012809	7.17595	25.3902
CLIC5	48.9338	22.8032	21.12	26.5785	89.0722	88.3598	121.219	1.7693	2.36776e-08	4.79837e-06	29.8589	99.5503
CCDC173	20.8229	46.8733	17.3929	53.157	172.14	73.6332	131.709	1.76959	0.00494337	0.0378831	34.5615	125.827
HKDC1	163.46	22.8032	12.4235	49.5326	276.224	66.2698	201.643	1.76994	1.28733e-05	0.000523057	62.0548	181.379
LINC00950	19.7817	7.60108	12.4235	3.62434	50.0406	19.1446	44.2915	1.77358	5.96356e-06	0.000299663	10.8577	37.8256
ZAR1L	5.20572	12.6685	4.9694	6.04056	21.017	17.672	31.4703	1.77513	0.00449635	0.0353823	7.22104	23.3864
ISM1	13.5349	11.4016	7.45411	2.41623	31.0252	22.0899	37.2981	1.77978	0.00566595	0.0419756	8.70171	30.1377
DUSP2	335.248	177.359	161.506	177.593	821.666	671.534	687.684	1.78024	2.96686e-05	0.000968211	212.926	726.962
LINC00861	8950.72	1765.98	823.679	1593.5	13195.7	5132.23	9240.61	1.78409	3.96797e-05	0.00117997	3283.47	9189.51
RRS1-AS1	11.4526	2.53369	9.93881	8.45679	27.0219	22.0899	33.8014	1.78655	0.00119492	0.014182	8.09547	27.6378
FAM19A1	16.6583	2.53369	3.72705	2.41623	24.0195	14.7266	20.9802	1.80674	0.00723114	0.049582	6.33382	19.9088
GCNT4	110.361	41.806	23.6047	56.7813	282.229	63.3245	289.06	1.81694	1.06795e-06	8.1159e-05	58.1383	211.538
COLGALT2	44.7692	8.86793	16.1506	47.1164	66.0536	73.6332	158.517	1.81909	0.00167989	0.0181896	29.226	99.4012
EHD4-AS1	8.32916	11.4016	16.1506	18.1217	57.0463	33.8713	50.1193	1.82209	0.000390443	0.00630955	13.5008	47.0123
LOC152225	26.0286	8.86793	6.21175	9.6649	36.0292	45.6526	40.7948	1.82487	0.0040327	0.0331481	12.6933	40.8255
AXIN2	310.261	59.5418	36.0282	86.9841	705.572	142.848	376.478	1.82675	2.50598e-07	2.79834e-05	123.204	408.299
TRNP1	6.24687	3.80054	1.24235	3.62434	10.0081	8.83598	20.9802	1.83086	0.00689873	0.0479842	3.72852	13.2748
IGSF9B	58.3041	22.8032	19.8776	9.6649	192.156	48.5979	60.6094	1.83177	0.00101877	0.0126117	27.6625	100.454
SOGA3	5.20572	10.1348	11.1812	2.41623	22.0179	27.9806	25.6424	1.83737	0.00167819	0.0181865	7.23447	25.2136
MDS2	150.966	32.938	16.1506	28.9947	439.356	63.3245	136.371	1.84378	0.000104699	0.00237709	57.2623	213.017
LINC00540	2.08229	26.6038	6.21175	8.45679	14.0114	58.9065	39.6292	1.85282	0.0050716	0.0386671	10.8387	37.5157
IL7R	6550.88	1475.88	1534.3	2633.69	15034.2	4565.26	11733.8	1.85808	1.36623e-08	3.15719e-06	3048.69	10444.4
CYSLTR2	201.982	302.776	69.5717	144.974	605.491	478.616	817.062	1.85935	0.000179229	0.00357625	179.826	633.723
GCSAML	60.3864	58.275	17.3929	65.2381	92.0747	159.048	305.378	1.87174	0.0026146	0.0247156	50.3231	185.5
RNF207	34.3578	17.7359	2.4847	10.873	43.0349	50.0705	73.4306	1.879	0.000432996	0.00678741	16.3628	55.512
MIR4697HG	594.493	273.639	74.5411	115.979	1274.03	636.19	796.081	1.87963	0.000254846	0.00462754	264.663	902.102
TMEM30B	105.156	24.0701	9.93881	27.7866	185.15	79.5238	139.868	1.88945	2.0289e-05	0.000730361	41.7378	134.847
MIR1200	4.16458	3.80054	1.24235	3.62434	14.0114	11.7813	10.4901	1.88979	0.00572683	0.0423069	3.20795	12.0943
GATA2	54.1395	76.0108	21.12	49.5326	106.086	139.903	311.206	1.89663	0.00162935	0.0179381	50.2007	185.732
A2MP1	102.032	6.33424	6.21175	32.619	149.121	45.6526	123.55	1.89806	0.0001416	0.00300306	36.7993	106.108
NUAK1	131.184	7.60108	3.72705	19.3298	121.098	47.1252	55.9472	1.90663	0.00415715	0.0336805	40.4605	74.7235
PLXDC1	250.916	62.0755	45.967	53.157	665.54	135.485	328.69	1.91898	0.000353712	0.00589642	103.029	376.571
NEK10	11.4526	1.26685	2.4847	3.62434	20.0162	8.83598	22.1458	1.92368	0.00171287	0.0184614	4.70712	16.9993
CAMK4	310.261	81.0782	77.0258	70.0705	811.658	225.317	446.412	1.92526	6.82253e-06	0.000327462	134.609	494.462
LINC00544	4.16458	2.53369	2.4847	6.04056	18.0146	4.41799	23.3113	1.93525	0.00317106	0.0280912	3.80588	15.248
ADORA2A	63.5098	96.2804	119.266	91.8166	261.212	455.053	335.683	1.93577	0.00102132	0.0126337	92.7181	350.649
FRMPD3	51.0161	6.33424	4.9694	10.873	85.069	48.5979	44.2915	1.93924	0.000430127	0.00675927	18.2982	59.3195
EGR3	411.252	288.841	316.799	440.961	1680.36	924.832	1547.87	1.94526	0.00173245	0.0186114	364.463	1384.36
CUX2	5.20572	2.53369	6.21175	2.41623	14.0114	16.1993	17.4835	1.94913	0.005062	0.0386478	4.09185	15.898
RGS1	637.18	300.243	223.623	304.444	1708.39	1061.79	1391.69	1.94983	6.34852e-06	0.000312009	366.373	1387.29
TTC39C-AS1	13.5349	11.4016	8.69646	18.1217	36.0292	41.2346	74.5962	1.9507	0.000512846	0.00763225	12.9387	50.62
EDAR	226.969	20.2696	19.8776	31.4109	429.348	95.7231	113.06	1.95525	0.000555361	0.00805236	74.6319	212.71
LINGO2	26.0286	3.80054	2.4847	9.6649	21.017	23.5626	44.2915	1.96454	0.00436028	0.0346055	10.4947	29.6237
HPCAL4	105.156	20.2696	11.1812	39.8677	201.163	50.0705	223.789	1.96459	0.000826615	0.0107264	44.1185	158.341
SLC16A10	19.7817	6.33424	7.45411	10.873	85.069	7.36332	57.1127	1.96518	0.000210452	0.00400493	11.1108	49.8483
PLAU	117.649	174.825	106.842	60.4056	278.226	885.071	409.114	1.96529	0.000581327	0.00836326	114.931	524.137
LOC101927156	63.5098	6.33424	9.93881	22.9541	89.0722	72.1605	94.4108	1.97494	1.27025e-05	0.000517399	25.6842	85.2145
PZP	305.055	40.5391	26.0894	56.7813	508.412	163.466	352.001	1.97777	1.08337e-05	0.00045716	107.116	341.293
LINC00649	494.544	55.7413	40.9976	96.649	1000.81	235.626	390.465	1.98455	1.89521e-05	0.000705438	171.983	542.301
DUSP4	131.184	114.016	149.082	102.69	495.402	425.6	583.948	2.00583	1.25591e-07	1.67608e-05	124.243	501.65
EPGN	3.12343	5.06739	2.4847	4.83245	16.013	11.7813	18.6491	2.01185	0.000542081	0.00795198	3.87699	15.4811
ELOVL4	4.16458	1.26685	2.4847	3.62434	15.0122	4.41799	16.3179	2.01196	0.00651074	0.0460862	2.88512	11.916
C15orf43	16.6583	6.33424	4.9694	3.62434	34.0276	27.9806	33.8014	2.03147	0.00346523	0.0298089	7.89657	31.9365
REREP3	53.0984	11.4016	3.72705	12.0811	85.069	54.4885	44.2915	2.03178	4.83334e-05	0.00135391	20.077	61.283
CD28	1715.81	663.828	303.134	541.234	4169.38	1581.64	3816.06	2.03187	1.38219e-06	9.7796e-05	806	3189.03
OLFM1	8.32916	35.4717	2.4847	6.04056	20.0162	107.504	32.6358	2.0325	0.00596489	0.0433055	13.0815	53.3855
FAM153C	90.5796	12.6685	7.45411	21.746	328.266	19.1446	83.9207	2.03861	0.0049939	0.0381633	33.112	143.777
THEMIS	753.789	164.69	120.508	148.598	1429.16	715.714	1047.84	2.04731	2.31349e-07	2.65567e-05	296.896	1064.24
ANKUB1	61.4275	10.1348	7.45411	32.619	217.176	30.9259	93.2453	2.05367	0.00207294	0.0210552	27.9089	113.782
SIRPG-AS1	36.4401	10.1348	8.69646	21.746	73.0593	25.0353	144.53	2.06806	3.54523e-05	0.00108573	19.2543	80.8749
INPP4B	421.663	183.693	106.842	166.72	1337.08	483.033	961.592	2.07879	1.03538e-09	3.69471e-07	219.73	927.237
UBASH3A	329.002	70.9434	53.4211	167.928	790.641	203.228	889.327	2.07916	2.35384e-05	0.000821839	155.323	627.732
SORCS3	143.678	20.2696	6.21175	4.83245	340.276	47.1252	52.4505	2.08326	0.00238213	0.0232063	43.7479	146.617
LOC728989	4.16458	24.0701	12.4235	10.873	11.0089	45.6526	100.239	2.08842	0.00602358	0.0436351	12.8828	52.3
CCR4	103.073	150.755	42.2399	160.679	489.397	276.861	741.3	2.09442	1.66105e-10	8.52066e-08	114.187	502.519
ZBED2	61.4275	7.60108	9.93881	18.1217	135.11	54.4885	86.2519	2.10418	1.75548e-06	0.000117139	24.2723	91.95
MCOLN3	29.152	10.1348	8.69646	4.83245	66.0536	36.8166	59.4439	2.10723	0.000803471	0.0105043	13.2039	54.1047
EGR1	648.633	956.47	1213.78	787.689	2465	5802.29	3932.62	2.11303	0.00112596	0.0135602	901.642	4066.64
DOK4	58.3041	51.9407	29.8164	47.1164	84.0682	365.22	243.603	2.12045	0.000226792	0.00422565	46.7944	230.964
NTRK1	8.32916	5.06739	2.4847	7.24868	24.0195	32.3986	20.9802	2.13572	7.02204e-05	0.00175914	5.78248	25.7994
LOC100996286	83.2916	3.80054	6.21175	22.9541	133.108	35.3439	120.053	2.1504	0.00302075	0.0270768	29.0645	96.1684
SMPD3	108.279	58.275	43.4823	60.4056	319.259	291.587	300.716	2.19927	9.4514e-09	2.35068e-06	67.6105	303.854
DUSP8	34.3578	16.469	24.847	7.24868	132.107	63.3245	95.5764	2.19938	6.61996e-05	0.00168123	20.7306	97.0027
ADAMTS5	2.08229	11.4016	8.69646	16.9136	30.0244	29.4533	69.934	2.22962	0.000206173	0.00394904	9.77349	43.1372
TLE2	24.9875	12.6685	4.9694	1.20811	89.0722	32.3986	36.1325	2.29195	0.00050537	0.00756902	10.9584	52.5345
KCNH2	38.5223	8.86793	6.21175	2.41623	78.0633	29.4533	66.4373	2.2929	0.000317497	0.00545511	14.0046	57.9846
IL21R-AS1	6.24687	1.26685	3.72705	1.20811	17.0138	14.7266	15.1524	2.30698	0.000384144	0.00625056	3.11222	15.6309
ICOS	594.493	241.968	125.477	175.176	858.696	1048.54	1883.55	2.32103	1.55694e-06	0.000106622	284.279	1263.6
FAM153A	216.558	51.9407	6.21175	26.5785	756.614	141.376	100.239	2.38421	0.000946844	0.0119282	75.3222	332.743
ANTXRLP1	39.5635	6.33424	2.4847	8.45679	122.099	26.5079	59.4439	2.40625	1.14311e-08	2.71944e-06	14.2098	69.3503
CXCL8	16098.2	16718.6	8182.12	11567.7	60747.3	76085.1	80925.2	2.40855	3.54081e-05	0.00108573	13141.6	72585.9
C14orf132	42.6869	7.60108	1.24235	15.7055	82.0666	35.3439	108.398	2.43705	1.70011e-05	0.000646081	16.809	75.2694
PVRL3	12.4937	3.80054	6.21175	3.62434	21.017	20.6173	65.2717	2.45252	2.28913e-05	0.000802906	6.53259	35.6353
ADAM23	38.5223	15.2022	11.1812	49.5326	114.093	45.6526	371.816	2.49334	0.000303675	0.00529737	28.6096	177.187
ITGB8	29.152	10.1348	9.93881	26.5785	68.0552	76.5785	166.676	2.50991	0.00073009	0.00976725	18.951	103.77
TMEM178B	2.08229	7.60108	4.9694	3.62434	28.0227	14.7266	26.808	2.51761	0.000275727	0.00491105	4.56928	23.1858
LOC728084	84.3327	10.1348	6.21175	14.4974	108.088	89.8324	153.855	2.54199	7.34085e-06	0.000342473	28.7941	117.258
NELL2	549.724	92.4798	79.5105	125.644	1583.28	419.709	1343.9	2.58328	9.09787e-09	2.32636e-06	211.84	1115.63
HRASLS5	9.3703	5.06739	7.45411	1.20811	31.0252	38.2892	37.2981	2.58493	0.000497062	0.00749933	5.77498	35.5375
CACNG8	49.9749	17.7359	21.12	45.9083	163.132	197.337	269.246	2.59061	0.000111747	0.00250933	33.6848	209.905
IL5RA	147.843	25.3369	48.4517	18.1217	308.25	250.353	459.233	2.6169	0.000208348	0.00398141	59.9382	339.279
FOSB	3609.65	5648.87	2059.82	2463.34	25173.4	14315.8	24634.2	2.70639	0.00155137	0.0172532	3445.42	21374.5
CCR8	6.24687	2.53369	2.4847	3.62434	24.0195	22.0899	33.8014	2.81719	3.87918e-07	4.08184e-05	3.7224	26.6369
ST8SIA1	44.7692	8.86793	9.93881	2.41623	120.097	60.3792	138.702	2.89635	2.62743e-08	5.13444e-06	16.498	106.393
SEZ6L	3.12343	7.60108	1.24235	4.83245	41.0333	16.1993	27.9736	2.91096	6.62659e-05	0.00168123	4.19983	28.4021
CYP7B1	1.04114	1.26685	4.9694	1.20811	12.0097	17.672	16.3179	2.96625	9.58765e-05	0.00221664	2.12138	15.3332
HRH4	26.0286	95.0135	12.4235	20.5379	134.109	223.845	426.597	2.97487	1.55327e-06	0.000106622	38.5009	261.517
AKAP12	15.6172	8.86793	28.5741	10.873	73.0593	83.9418	230.782	2.98369	2.00495e-05	0.000728126	15.983	129.261
ENPP3	13.5349	8.86793	1.24235	6.04056	54.0438	32.3986	106.066	3.11494	4.30572e-06	0.000232494	7.42143	64.1696
UGT2B11	24.9875	7.60108	19.8776	6.04056	148.12	136.958	156.186	3.26451	0.00179995	0.0191114	14.6267	147.088
MS4A2	84.3327	16.469	27.3317	18.1217	270.219	192.919	580.452	3.32201	4.20899e-06	0.000229537	36.5638	347.863
CPA3	30.1932	5.06739	4.9694	25.3704	137.111	181.138	299.55	3.7088	1.82908e-06	0.000121479	16.4001	205.933
PTGDR2	21.864	2.53369	4.9694	1.20811	81.0657	64.7972	176	3.88562	7.63424e-07	6.45959e-05	7.64381	107.288
FCER1A	81.2093	40.5391	50.9364	25.3704	619.502	441.799	1198.2	3.90148	2.10514e-06	0.000137126	49.5138	753.168
HDC	195.735	27.8706	18.6353	90.6084	854.693	1113.33	1490.76	4.03699	5.58083e-05	0.00150426	83.2124	1152.93
SIGLEC8	27.0698	1.26685	3.72705	1.20811	125.101	101.614	174.835	4.41619	8.29533e-05	0.00199659	8.31794	133.85
ALOX15	66.6332	7.60108	4.9694	3.62434	413.335	328.404	586.28	4.87548	6.3861e-05	0.00164824	20.707	442.673

## Sheet: GSEA-H
Gene Set Name	# Genes in Gene Set (K)	Description	# Genes in Overlap (k)	k/K	p-value	FDR q-value
HALLMARK_INTERFERON_GAMMA_RESPONSE	200	Genes up-regulated in response to IFNG [GeneID=3458].	56	0.28	4.58e-64	2.29e-62
HALLMARK_INTERFERON_ALPHA_RESPONSE	97	Genes up-regulated in response to alpha interferon proteins.	45	0.4639	1.58e-63	3.95e-62
HALLMARK_G2M_CHECKPOINT	200	Genes involved in the G2/M checkpoint, as in progression through the cell division cycle.	20	0.1	3.07e-14	5.12e-13
HALLMARK_INFLAMMATORY_RESPONSE	200	Genes defining inflammatory response.	18	0.09	3.63e-12	4.54e-11
HALLMARK_E2F_TARGETS	200	Genes encoding cell cycle related targets of E2F transcription factors.	16	0.08	3.36e-10	3.36e-09
HALLMARK_COAGULATION	138	Genes encoding components of blood coagulation system; also up-regulated in platelets.	9	0.0652	1.36e-05	0.000114
HALLMARK_IL2_STAT5_SIGNALING	199	Genes up-regulated by STAT5 in response to IL2 stimulation.	10	0.0503	4.38e-05	0.000254
HALLMARK_KRAS_SIGNALING_UP	200	Genes up-regulated by KRAS activation.	10	0.05	4.57e-05	0.000254
HALLMARK_XENOBIOTIC_METABOLISM	200	Genes encoding proteins involved in processing of drugs and other xenobiotics.	10	0.05	4.57e-05	0.000254
HALLMARK_COMPLEMENT	200	Genes encoding components of the complement system, which is part of the innate immune system.	9	0.045	0.00024	0.00109
HALLMARK_TNFA_SIGNALING_VIA_NFKB	200	Genes regulated by NF-kB in response to TNF [GeneID=7124].	9	0.045	0.00024	0.00109
HALLMARK_IL6_JAK_STAT3_SIGNALING	87	Genes up-regulated by IL6 [GeneID=3569] via STAT3 [GeneID=6774], e.g., during acute phase response.	6	0.069	0.00028	0.00117
HALLMARK_ALLOGRAFT_REJECTION	200	Genes up-regulated during transplant rejection.	8	0.04	0.00114	0.00378
HALLMARK_EPITHELIAL_MESENCHYMAL_TRANSITION	200	Genes defining epithelial-mesenchymal transition, as in wound healing, fibrosis and metastasis.	8	0.04	0.00114	0.00378
HALLMARK_HYPOXIA	200	Genes up-regulated in response to low oxygen levels (hypoxia).	8	0.04	0.00114	0.00378
Gene Symbol	HALLMARK_INTERFERON_GAMMA_RESPONSE	HALLMARK_INTERFERON_ALPHA_RESPONSE	HALLMARK_INFLAMMATORY_RESPONSE	HALLMARK_COAGULATION	HALLMARK_IL2_STAT5_SIGNALING	HALLMARK_XENOBIOTIC_METABOLISM	HALLMARK_COMPLEMENT	HALLMARK_TNFA_SIGNALING_VIA_NFKB	HALLMARK_IL6_JAK_STAT3_SIGNALING	HALLMARK_ALLOGRAFT_REJECTION
CXCL10	HALLMARK_INTERFERON_GAMMA_RESPONSE	HALLMARK_INTERFERON_ALPHA_RESPONSE	HALLMARK_INFLAMMATORY_RESPONSE		HALLMARK_IL2_STAT5_SIGNALING			HALLMARK_TNFA_SIGNALING_VIA_NFKB	HALLMARK_IL6_JAK_STAT3_SIGNALING
CXCL11	HALLMARK_INTERFERON_GAMMA_RESPONSE	HALLMARK_INTERFERON_ALPHA_RESPONSE	HALLMARK_INFLAMMATORY_RESPONSE					HALLMARK_TNFA_SIGNALING_VIA_NFKB	HALLMARK_IL6_JAK_STAT3_SIGNALING
IL15	HALLMARK_INTERFERON_GAMMA_RESPONSE	HALLMARK_INTERFERON_ALPHA_RESPONSE	HALLMARK_INFLAMMATORY_RESPONSE							HALLMARK_ALLOGRAFT_REJECTION
LY6E	HALLMARK_INTERFERON_GAMMA_RESPONSE	HALLMARK_INTERFERON_ALPHA_RESPONSE	HALLMARK_INFLAMMATORY_RESPONSE
EIF2AK2	HALLMARK_INTERFERON_GAMMA_RESPONSE	HALLMARK_INTERFERON_ALPHA_RESPONSE	HALLMARK_INFLAMMATORY_RESPONSE
RTP4	HALLMARK_INTERFERON_GAMMA_RESPONSE	HALLMARK_INTERFERON_ALPHA_RESPONSE	HALLMARK_INFLAMMATORY_RESPONSE
BST2	HALLMARK_INTERFERON_GAMMA_RESPONSE	HALLMARK_INTERFERON_ALPHA_RESPONSE	HALLMARK_INFLAMMATORY_RESPONSE
NMI	HALLMARK_INTERFERON_GAMMA_RESPONSE	HALLMARK_INTERFERON_ALPHA_RESPONSE	HALLMARK_INFLAMMATORY_RESPONSE
PLSCR1	HALLMARK_INTERFERON_GAMMA_RESPONSE	HALLMARK_INTERFERON_ALPHA_RESPONSE			HALLMARK_IL2_STAT5_SIGNALING		HALLMARK_COMPLEMENT
IFITM3	HALLMARK_INTERFERON_GAMMA_RESPONSE	HALLMARK_INTERFERON_ALPHA_RESPONSE			HALLMARK_IL2_STAT5_SIGNALING
PSMB9	HALLMARK_INTERFERON_GAMMA_RESPONSE	HALLMARK_INTERFERON_ALPHA_RESPONSE					HALLMARK_COMPLEMENT
IFIT2	HALLMARK_INTERFERON_GAMMA_RESPONSE	HALLMARK_INTERFERON_ALPHA_RESPONSE						HALLMARK_TNFA_SIGNALING_VIA_NFKB
IFIH1	HALLMARK_INTERFERON_GAMMA_RESPONSE	HALLMARK_INTERFERON_ALPHA_RESPONSE						HALLMARK_TNFA_SIGNALING_VIA_NFKB
STAT2	HALLMARK_INTERFERON_GAMMA_RESPONSE	HALLMARK_INTERFERON_ALPHA_RESPONSE							HALLMARK_IL6_JAK_STAT3_SIGNALING
IFI44L	HALLMARK_INTERFERON_GAMMA_RESPONSE	HALLMARK_INTERFERON_ALPHA_RESPONSE
MX1	HALLMARK_INTERFERON_GAMMA_RESPONSE	HALLMARK_INTERFERON_ALPHA_RESPONSE
RSAD2	HALLMARK_INTERFERON_GAMMA_RESPONSE	HALLMARK_INTERFERON_ALPHA_RESPONSE
TRAFD1	HALLMARK_INTERFERON_GAMMA_RESPONSE	HALLMARK_INTERFERON_ALPHA_RESPONSE
UBE2L6	HALLMARK_INTERFERON_GAMMA_RESPONSE	HALLMARK_INTERFERON_ALPHA_RESPONSE
CMPK2	HALLMARK_INTERFERON_GAMMA_RESPONSE	HALLMARK_INTERFERON_ALPHA_RESPONSE
IFI44	HALLMARK_INTERFERON_GAMMA_RESPONSE	HALLMARK_INTERFERON_ALPHA_RESPONSE
USP18	HALLMARK_INTERFERON_GAMMA_RESPONSE	HALLMARK_INTERFERON_ALPHA_RESPONSE
BATF2	HALLMARK_INTERFERON_GAMMA_RESPONSE	HALLMARK_INTERFERON_ALPHA_RESPONSE
SAMD9L	HALLMARK_INTERFERON_GAMMA_RESPONSE	HALLMARK_INTERFERON_ALPHA_RESPONSE
TDRD7	HALLMARK_INTERFERON_GAMMA_RESPONSE	HALLMARK_INTERFERON_ALPHA_RESPONSE
IFI27	HALLMARK_INTERFERON_GAMMA_RESPONSE	HALLMARK_INTERFERON_ALPHA_RESPONSE
IFI35	HALLMARK_INTERFERON_GAMMA_RESPONSE	HALLMARK_INTERFERON_ALPHA_RESPONSE
IFIT3	HALLMARK_INTERFERON_GAMMA_RESPONSE	HALLMARK_INTERFERON_ALPHA_RESPONSE
LGALS3BP	HALLMARK_INTERFERON_GAMMA_RESPONSE	HALLMARK_INTERFERON_ALPHA_RESPONSE
PARP14	HALLMARK_INTERFERON_GAMMA_RESPONSE	HALLMARK_INTERFERON_ALPHA_RESPONSE
HERC6	HALLMARK_INTERFERON_GAMMA_RESPONSE	HALLMARK_INTERFERON_ALPHA_RESPONSE
DDX60	HALLMARK_INTERFERON_GAMMA_RESPONSE	HALLMARK_INTERFERON_ALPHA_RESPONSE
PARP12	HALLMARK_INTERFERON_GAMMA_RESPONSE	HALLMARK_INTERFERON_ALPHA_RESPONSE
TRIM21	HALLMARK_INTERFERON_GAMMA_RESPONSE	HALLMARK_INTERFERON_ALPHA_RESPONSE
DHX58	HALLMARK_INTERFERON_GAMMA_RESPONSE	HALLMARK_INTERFERON_ALPHA_RESPONSE
HELZ2	HALLMARK_INTERFERON_GAMMA_RESPONSE	HALLMARK_INTERFERON_ALPHA_RESPONSE
OASL	HALLMARK_INTERFERON_GAMMA_RESPONSE	HALLMARK_INTERFERON_ALPHA_RESPONSE
EPSTI1	HALLMARK_INTERFERON_GAMMA_RESPONSE	HALLMARK_INTERFERON_ALPHA_RESPONSE
MT2A	HALLMARK_INTERFERON_GAMMA_RESPONSE					HALLMARK_XENOBIOTIC_METABOLISM
PML	HALLMARK_INTERFERON_GAMMA_RESPONSE
TNFSF10	HALLMARK_INTERFERON_GAMMA_RESPONSE		HALLMARK_INFLAMMATORY_RESPONSE		HALLMARK_IL2_STAT5_SIGNALING
TNFAIP6	HALLMARK_INTERFERON_GAMMA_RESPONSE		HALLMARK_INFLAMMATORY_RESPONSE					HALLMARK_TNFA_SIGNALING_VIA_NFKB
CFB	HALLMARK_INTERFERON_GAMMA_RESPONSE			HALLMARK_COAGULATION		HALLMARK_XENOBIOTIC_METABOLISM	HALLMARK_COMPLEMENT
SERPING1	HALLMARK_INTERFERON_GAMMA_RESPONSE			HALLMARK_COAGULATION			HALLMARK_COMPLEMENT
ARL4A	HALLMARK_INTERFERON_GAMMA_RESPONSE				HALLMARK_IL2_STAT5_SIGNALING
DDX58	HALLMARK_INTERFERON_GAMMA_RESPONSE							HALLMARK_TNFA_SIGNALING_VIA_NFKB
STAT1	HALLMARK_INTERFERON_GAMMA_RESPONSE								HALLMARK_IL6_JAK_STAT3_SIGNALING	HALLMARK_ALLOGRAFT_REJECTION
SSPN	HALLMARK_INTERFERON_GAMMA_RESPONSE
IFIT1	HALLMARK_INTERFERON_GAMMA_RESPONSE
VAMP5	HALLMARK_INTERFERON_GAMMA_RESPONSE
GBP6	HALLMARK_INTERFERON_GAMMA_RESPONSE
OAS2	HALLMARK_INTERFERON_GAMMA_RESPONSE
OAS3	HALLMARK_INTERFERON_GAMMA_RESPONSE
XAF1	HALLMARK_INTERFERON_GAMMA_RESPONSE
APOL6	HALLMARK_INTERFERON_GAMMA_RESPONSE
ZBP1	HALLMARK_INTERFERON_GAMMA_RESPONSE
IFITM1		HALLMARK_INTERFERON_ALPHA_RESPONSE	HALLMARK_INFLAMMATORY_RESPONSE
MOV10		HALLMARK_INTERFERON_ALPHA_RESPONSE
OAS1		HALLMARK_INTERFERON_ALPHA_RESPONSE
SAMD9		HALLMARK_INTERFERON_ALPHA_RESPONSE
TMEM140		HALLMARK_INTERFERON_ALPHA_RESPONSE
PARP9		HALLMARK_INTERFERON_ALPHA_RESPONSE
TRIM5		HALLMARK_INTERFERON_ALPHA_RESPONSE
CDC6					HALLMARK_IL2_STAT5_SIGNALING
HPN			HALLMARK_INFLAMMATORY_RESPONSE	HALLMARK_COAGULATION
RGS16			HALLMARK_INFLAMMATORY_RESPONSE		HALLMARK_IL2_STAT5_SIGNALING
IL18R1			HALLMARK_INFLAMMATORY_RESPONSE		HALLMARK_IL2_STAT5_SIGNALING				HALLMARK_IL6_JAK_STAT3_SIGNALING
C3AR1			HALLMARK_INFLAMMATORY_RESPONSE
IL18RAP			HALLMARK_INFLAMMATORY_RESPONSE							HALLMARK_ALLOGRAFT_REJECTION
CALCRL			HALLMARK_INFLAMMATORY_RESPONSE
RNF144B			HALLMARK_INFLAMMATORY_RESPONSE
C2				HALLMARK_COAGULATION			HALLMARK_COMPLEMENT			HALLMARK_ALLOGRAFT_REJECTION
FN1				HALLMARK_COAGULATION			HALLMARK_COMPLEMENT
ANG				HALLMARK_COAGULATION			HALLMARK_COMPLEMENT
C3				HALLMARK_COAGULATION			HALLMARK_COMPLEMENT
TIMP3				HALLMARK_COAGULATION
THBS1				HALLMARK_COAGULATION
CAPG					HALLMARK_IL2_STAT5_SIGNALING					HALLMARK_ALLOGRAFT_REJECTION
GALM					HALLMARK_IL2_STAT5_SIGNALING
JUP						HALLMARK_XENOBIOTIC_METABOLISM
TPST1						HALLMARK_XENOBIOTIC_METABOLISM
MAOA						HALLMARK_XENOBIOTIC_METABOLISM
VNN1						HALLMARK_XENOBIOTIC_METABOLISM
CES1						HALLMARK_XENOBIOTIC_METABOLISM
DDAH2						HALLMARK_XENOBIOTIC_METABOLISM
UPB1						HALLMARK_XENOBIOTIC_METABOLISM
SLC22A1						HALLMARK_XENOBIOTIC_METABOLISM
C1QC							HALLMARK_COMPLEMENT
SDC4								HALLMARK_TNFA_SIGNALING_VIA_NFKB
EFNA1								HALLMARK_TNFA_SIGNALING_VIA_NFKB
PLPP3								HALLMARK_TNFA_SIGNALING_VIA_NFKB
ACVRL1									HALLMARK_IL6_JAK_STAT3_SIGNALING
INHBB										HALLMARK_ALLOGRAFT_REJECTION
HLA-DOB										HALLMARK_ALLOGRAFT_REJECTION
SOCS5										HALLMARK_ALLOGRAFT_REJECTION

## Sheet: GSEA-C2
Gene Set Name	# Genes in Gene Set (K)	Description	# Genes in Overlap (k)	k/K	p-value	FDR q-value
BLANCO_MELO_BRONCHIAL_EPITHELIAL_CELLS_INFLUENZA_A_DEL_NS1_INFECTION_UP	644	Genes up-regulated on infection of normal human bronchial epithelial cells by mutant Influenza A lacking its antiviral antagonist (IAV_NS1) (MOI: 3, 12hpi)	95	0.1475	5.26e-81	3.31e-77
BLANCO_MELO_HUMAN_PARAINFLUENZA_VIRUS_3_INFECTION_A594_CELLS_UP	204	Genes up-regulated in HPIV3 (A549 cells, MOI: 2, 24hpi)	64	0.3137	6.68e-77	2.1e-73
HECKER_IFNB1_TARGETS	95	Genes transcriptionally modulated in the blood of multiple sclerosis patients in response to subcutaneous treatment with recombinant IFNB1 [GeneID = 3456].	49	0.5158	3.56e-72	7.46e-69
BLANCO_MELO_COVID19_SARS_COV_2_INFECTION_CALU3_CELLS_UP	339	Genes up-regulated in SARS-CoV-2 infection (Calu-3 cells, MOI: 2, 24hpi)	63	0.1858	8.27e-60	1.3e-56
TAKEDA_TARGETS_OF_NUP98_HOXA9_FUSION_3D_UP	186	Genes up-regulated in CD34+ [GeneID=947] hematopoetic cells by expression of NUP98-HOXA9 fusion [GeneID=4928;3205] off a retroviral vector at 3 days after transduction.	50	0.2688	3.23e-56	4.06e-53
XIE_ST_HSC_S1PR3_OE_UP	188	Genes upregulated in short-term hematopoietic stem cells (CD34+,CD38_,CD45RA_,CD90_,CD49f_) upon overexpression of Sphingosine-1-Phosphate Receptor 3 (S1PR3)	50	0.266	5.9e-56	6.18e-53
MOSERLE_IFNA_RESPONSE	32	Top 50 genes up-regulated in ovarian cancer progenitor cells (also known as side population, SP, cells) in response to interferon alpha (IFNA).	29	0.9062	3.59e-55	3.23e-52
FULCHER_INFLAMMATORY_RESPONSE_LECTIN_VS_LPS_DN	458	Genes down-regulated in monocyte-derived dendritic cells (MDDC) after stimulation with galecin-1 (lectin, LGALS1) [GeneID=3956] compared to that with bacterial lipopolysaccharide (LPS).	63	0.1376	2.7e-51	2.12e-48
BLANCO_MELO_RESPIRATORY_SYNCYTIAL_VIRUS_INFECTION_A594_CELLS_UP	286	Genes up-regulated in RSV (A549 cells, MOI: 2, 24hpi)	52	0.1818	7.63e-49	5.33e-46
BLANCO_MELO_COVID19_SARS_COV_2_POS_PATIENT_LUNG_TISSUE_UP	172	Genes strongly up-regulated (log2(FC)>3.58, padj<0.05) in post mortem lung tissue from COVID-19 patients vs uninfected biopsy.	44	0.2558	1.81e-48	1.14e-45
BOSCO_INTERFERON_INDUCED_ANTIVIRAL_MODULE	78	Genes representing interferon-induced antiviral module in sputum during asthma exacerbations.	34	0.4359	5.5e-47	3.15e-44
TAKEDA_TARGETS_OF_NUP98_HOXA9_FUSION_10D_UP	195	Genes up-regulated in CD34+ [GeneID=947] hematopoetic cells by expression of NUP98-HOXA9 fusion [GeneID=4928;3205] off a retroviral vector at 10 days after transduction.	44	0.2256	8e-46	4.19e-43
BROWNE_INTERFERON_RESPONSIVE_GENES	67	Genes up-regulated in primary fibroblast culture after treatment with interferon alpha for 6 h.	31	0.4627	5.78e-44	2.79e-41
SANA_RESPONSE_TO_IFNG_UP	76	Genes up-regulated in five primary endothelial cell types (lung, aortic, iliac, dermal, and colon) by IFNG [GeneID=3458].	30	0.3947	6e-40	2.69e-37
BLANCO_MELO_BETA_INTERFERON_TREATED_BRONCHIAL_EPITHELIAL_CELLS_UP	378	Genes up-regulated on treatment of normal human bronchial epithelial cells with beta interferon (hIFNB treatment 100u/ml, 4-12hrs).	48	0.127	1.87e-37	7.84e-35
DAUER_STAT3_TARGETS_DN	48	Top 50 genes down-regulated in A549 cells (lung cancer) expressing STAT3 [GeneID=6774] off an adenovirus vector.	25	0.5208	2.2e-37	8.64e-35
NUYTTEN_EZH2_TARGETS_UP	1033	Genes up-regulated in PC3 cells (prostate cancer) after knockdown of EZH2 [GeneID=2146] by RNAi.	69	0.0668	1.92e-35	7.11e-33
TAKEDA_TARGETS_OF_NUP98_HOXA9_FUSION_8D_UP	156	Genes up-regulated in CD34+ [GeneID=947] hematopoetic cells by expression of NUP98-HOXA9 fusion [GeneID=4928;3205] off a retroviral vector at 8 days after transduction.	32	0.2051	3.85e-32	1.34e-29
NUYTTEN_NIPP1_TARGETS_UP	767	Genes up-regulated in PC3 cells (prostate cancer) after knockdown of NIPP1 [GeneID=5511] by RNAi.	55	0.0717	8.4e-30	2.78e-27
REACTOME_INTERFERON_SIGNALING	203	Interferon Signaling	33	0.1626	1.31e-29	4.11e-27
Gene Symbol	BLANCO_MELO_BRONCHIAL_EPITHELIAL_CELLS_INFLUENZA_A_DEL_NS1_INFECTION_UP	BLANCO_MELO_HUMAN_PARAINFLUENZA_VIRUS_3_INFECTION_A594_CELLS_UP	HECKER_IFNB1_TARGETS	BLANCO_MELO_COVID19_SARS_COV_2_INFECTION_CALU3_CELLS_UP	MOSERLE_IFNA_RESPONSE	FULCHER_INFLAMMATORY_RESPONSE_LECTIN_VS_LPS_DN	BLANCO_MELO_RESPIRATORY_SYNCYTIAL_VIRUS_INFECTION_A594_CELLS_UP	BLANCO_MELO_COVID19_SARS_COV_2_POS_PATIENT_LUNG_TISSUE_UP	BOSCO_INTERFERON_INDUCED_ANTIVIRAL_MODULE	BROWNE_INTERFERON_RESPONSIVE_GENES	SANA_RESPONSE_TO_IFNG_UP	BLANCO_MELO_BETA_INTERFERON_TREATED_BRONCHIAL_EPITHELIAL_CELLS_UP	REACTOME_INTERFERON_SIGNALING
MX1	BLANCO_MELO_BRONCHIAL_EPITHELIAL_CELLS_INFLUENZA_A_DEL_NS1_INFECTION_UP	BLANCO_MELO_HUMAN_PARAINFLUENZA_VIRUS_3_INFECTION_A594_CELLS_UP	HECKER_IFNB1_TARGETS	BLANCO_MELO_COVID19_SARS_COV_2_INFECTION_CALU3_CELLS_UP	MOSERLE_IFNA_RESPONSE	FULCHER_INFLAMMATORY_RESPONSE_LECTIN_VS_LPS_DN	BLANCO_MELO_RESPIRATORY_SYNCYTIAL_VIRUS_INFECTION_A594_CELLS_UP	BLANCO_MELO_COVID19_SARS_COV_2_POS_PATIENT_LUNG_TISSUE_UP	BOSCO_INTERFERON_INDUCED_ANTIVIRAL_MODULE	BROWNE_INTERFERON_RESPONSIVE_GENES	SANA_RESPONSE_TO_IFNG_UP	BLANCO_MELO_BETA_INTERFERON_TREATED_BRONCHIAL_EPITHELIAL_CELLS_UP	REACTOME_INTERFERON_SIGNALING
IFI44L	BLANCO_MELO_BRONCHIAL_EPITHELIAL_CELLS_INFLUENZA_A_DEL_NS1_INFECTION_UP	BLANCO_MELO_HUMAN_PARAINFLUENZA_VIRUS_3_INFECTION_A594_CELLS_UP	HECKER_IFNB1_TARGETS	BLANCO_MELO_COVID19_SARS_COV_2_INFECTION_CALU3_CELLS_UP	MOSERLE_IFNA_RESPONSE	FULCHER_INFLAMMATORY_RESPONSE_LECTIN_VS_LPS_DN	BLANCO_MELO_RESPIRATORY_SYNCYTIAL_VIRUS_INFECTION_A594_CELLS_UP	BLANCO_MELO_COVID19_SARS_COV_2_POS_PATIENT_LUNG_TISSUE_UP	BOSCO_INTERFERON_INDUCED_ANTIVIRAL_MODULE	BROWNE_INTERFERON_RESPONSIVE_GENES	SANA_RESPONSE_TO_IFNG_UP
IFIT3	BLANCO_MELO_BRONCHIAL_EPITHELIAL_CELLS_INFLUENZA_A_DEL_NS1_INFECTION_UP	BLANCO_MELO_HUMAN_PARAINFLUENZA_VIRUS_3_INFECTION_A594_CELLS_UP	HECKER_IFNB1_TARGETS	BLANCO_MELO_COVID19_SARS_COV_2_INFECTION_CALU3_CELLS_UP	MOSERLE_IFNA_RESPONSE	FULCHER_INFLAMMATORY_RESPONSE_LECTIN_VS_LPS_DN	BLANCO_MELO_RESPIRATORY_SYNCYTIAL_VIRUS_INFECTION_A594_CELLS_UP	BLANCO_MELO_COVID19_SARS_COV_2_POS_PATIENT_LUNG_TISSUE_UP	BOSCO_INTERFERON_INDUCED_ANTIVIRAL_MODULE	BROWNE_INTERFERON_RESPONSIVE_GENES		BLANCO_MELO_BETA_INTERFERON_TREATED_BRONCHIAL_EPITHELIAL_CELLS_UP	REACTOME_INTERFERON_SIGNALING
SAMD9L	BLANCO_MELO_BRONCHIAL_EPITHELIAL_CELLS_INFLUENZA_A_DEL_NS1_INFECTION_UP	BLANCO_MELO_HUMAN_PARAINFLUENZA_VIRUS_3_INFECTION_A594_CELLS_UP	HECKER_IFNB1_TARGETS	BLANCO_MELO_COVID19_SARS_COV_2_INFECTION_CALU3_CELLS_UP	MOSERLE_IFNA_RESPONSE	FULCHER_INFLAMMATORY_RESPONSE_LECTIN_VS_LPS_DN	BLANCO_MELO_RESPIRATORY_SYNCYTIAL_VIRUS_INFECTION_A594_CELLS_UP	BLANCO_MELO_COVID19_SARS_COV_2_POS_PATIENT_LUNG_TISSUE_UP	BOSCO_INTERFERON_INDUCED_ANTIVIRAL_MODULE		SANA_RESPONSE_TO_IFNG_UP	BLANCO_MELO_BETA_INTERFERON_TREATED_BRONCHIAL_EPITHELIAL_CELLS_UP
IFIT1	BLANCO_MELO_BRONCHIAL_EPITHELIAL_CELLS_INFLUENZA_A_DEL_NS1_INFECTION_UP	BLANCO_MELO_HUMAN_PARAINFLUENZA_VIRUS_3_INFECTION_A594_CELLS_UP	HECKER_IFNB1_TARGETS	BLANCO_MELO_COVID19_SARS_COV_2_INFECTION_CALU3_CELLS_UP	MOSERLE_IFNA_RESPONSE	FULCHER_INFLAMMATORY_RESPONSE_LECTIN_VS_LPS_DN	BLANCO_MELO_RESPIRATORY_SYNCYTIAL_VIRUS_INFECTION_A594_CELLS_UP	BLANCO_MELO_COVID19_SARS_COV_2_POS_PATIENT_LUNG_TISSUE_UP	BOSCO_INTERFERON_INDUCED_ANTIVIRAL_MODULE			BLANCO_MELO_BETA_INTERFERON_TREATED_BRONCHIAL_EPITHELIAL_CELLS_UP	REACTOME_INTERFERON_SIGNALING
HERC5	BLANCO_MELO_BRONCHIAL_EPITHELIAL_CELLS_INFLUENZA_A_DEL_NS1_INFECTION_UP	BLANCO_MELO_HUMAN_PARAINFLUENZA_VIRUS_3_INFECTION_A594_CELLS_UP	HECKER_IFNB1_TARGETS	BLANCO_MELO_COVID19_SARS_COV_2_INFECTION_CALU3_CELLS_UP	MOSERLE_IFNA_RESPONSE	FULCHER_INFLAMMATORY_RESPONSE_LECTIN_VS_LPS_DN	BLANCO_MELO_RESPIRATORY_SYNCYTIAL_VIRUS_INFECTION_A594_CELLS_UP	BLANCO_MELO_COVID19_SARS_COV_2_POS_PATIENT_LUNG_TISSUE_UP	BOSCO_INTERFERON_INDUCED_ANTIVIRAL_MODULE				REACTOME_INTERFERON_SIGNALING
OAS1	BLANCO_MELO_BRONCHIAL_EPITHELIAL_CELLS_INFLUENZA_A_DEL_NS1_INFECTION_UP	BLANCO_MELO_HUMAN_PARAINFLUENZA_VIRUS_3_INFECTION_A594_CELLS_UP	HECKER_IFNB1_TARGETS	BLANCO_MELO_COVID19_SARS_COV_2_INFECTION_CALU3_CELLS_UP	MOSERLE_IFNA_RESPONSE	FULCHER_INFLAMMATORY_RESPONSE_LECTIN_VS_LPS_DN	BLANCO_MELO_RESPIRATORY_SYNCYTIAL_VIRUS_INFECTION_A594_CELLS_UP	BLANCO_MELO_COVID19_SARS_COV_2_POS_PATIENT_LUNG_TISSUE_UP		BROWNE_INTERFERON_RESPONSIVE_GENES	SANA_RESPONSE_TO_IFNG_UP		REACTOME_INTERFERON_SIGNALING
CXCL10	BLANCO_MELO_BRONCHIAL_EPITHELIAL_CELLS_INFLUENZA_A_DEL_NS1_INFECTION_UP	BLANCO_MELO_HUMAN_PARAINFLUENZA_VIRUS_3_INFECTION_A594_CELLS_UP	HECKER_IFNB1_TARGETS	BLANCO_MELO_COVID19_SARS_COV_2_INFECTION_CALU3_CELLS_UP	MOSERLE_IFNA_RESPONSE	FULCHER_INFLAMMATORY_RESPONSE_LECTIN_VS_LPS_DN	BLANCO_MELO_RESPIRATORY_SYNCYTIAL_VIRUS_INFECTION_A594_CELLS_UP	BLANCO_MELO_COVID19_SARS_COV_2_POS_PATIENT_LUNG_TISSUE_UP		BROWNE_INTERFERON_RESPONSIVE_GENES	SANA_RESPONSE_TO_IFNG_UP
IFIT2	BLANCO_MELO_BRONCHIAL_EPITHELIAL_CELLS_INFLUENZA_A_DEL_NS1_INFECTION_UP	BLANCO_MELO_HUMAN_PARAINFLUENZA_VIRUS_3_INFECTION_A594_CELLS_UP	HECKER_IFNB1_TARGETS	BLANCO_MELO_COVID19_SARS_COV_2_INFECTION_CALU3_CELLS_UP	MOSERLE_IFNA_RESPONSE	FULCHER_INFLAMMATORY_RESPONSE_LECTIN_VS_LPS_DN	BLANCO_MELO_RESPIRATORY_SYNCYTIAL_VIRUS_INFECTION_A594_CELLS_UP	BLANCO_MELO_COVID19_SARS_COV_2_POS_PATIENT_LUNG_TISSUE_UP		BROWNE_INTERFERON_RESPONSIVE_GENES		BLANCO_MELO_BETA_INTERFERON_TREATED_BRONCHIAL_EPITHELIAL_CELLS_UP	REACTOME_INTERFERON_SIGNALING
IFI44	BLANCO_MELO_BRONCHIAL_EPITHELIAL_CELLS_INFLUENZA_A_DEL_NS1_INFECTION_UP	BLANCO_MELO_HUMAN_PARAINFLUENZA_VIRUS_3_INFECTION_A594_CELLS_UP	HECKER_IFNB1_TARGETS	BLANCO_MELO_COVID19_SARS_COV_2_INFECTION_CALU3_CELLS_UP	MOSERLE_IFNA_RESPONSE	FULCHER_INFLAMMATORY_RESPONSE_LECTIN_VS_LPS_DN	BLANCO_MELO_RESPIRATORY_SYNCYTIAL_VIRUS_INFECTION_A594_CELLS_UP		BOSCO_INTERFERON_INDUCED_ANTIVIRAL_MODULE	BROWNE_INTERFERON_RESPONSIVE_GENES
OASL	BLANCO_MELO_BRONCHIAL_EPITHELIAL_CELLS_INFLUENZA_A_DEL_NS1_INFECTION_UP	BLANCO_MELO_HUMAN_PARAINFLUENZA_VIRUS_3_INFECTION_A594_CELLS_UP	HECKER_IFNB1_TARGETS	BLANCO_MELO_COVID19_SARS_COV_2_INFECTION_CALU3_CELLS_UP	MOSERLE_IFNA_RESPONSE	FULCHER_INFLAMMATORY_RESPONSE_LECTIN_VS_LPS_DN	BLANCO_MELO_RESPIRATORY_SYNCYTIAL_VIRUS_INFECTION_A594_CELLS_UP		BOSCO_INTERFERON_INDUCED_ANTIVIRAL_MODULE	BROWNE_INTERFERON_RESPONSIVE_GENES			REACTOME_INTERFERON_SIGNALING
RSAD2	BLANCO_MELO_BRONCHIAL_EPITHELIAL_CELLS_INFLUENZA_A_DEL_NS1_INFECTION_UP	BLANCO_MELO_HUMAN_PARAINFLUENZA_VIRUS_3_INFECTION_A594_CELLS_UP	HECKER_IFNB1_TARGETS	BLANCO_MELO_COVID19_SARS_COV_2_INFECTION_CALU3_CELLS_UP	MOSERLE_IFNA_RESPONSE	FULCHER_INFLAMMATORY_RESPONSE_LECTIN_VS_LPS_DN	BLANCO_MELO_RESPIRATORY_SYNCYTIAL_VIRUS_INFECTION_A594_CELLS_UP		BOSCO_INTERFERON_INDUCED_ANTIVIRAL_MODULE	BROWNE_INTERFERON_RESPONSIVE_GENES			REACTOME_INTERFERON_SIGNALING
GBP1	BLANCO_MELO_BRONCHIAL_EPITHELIAL_CELLS_INFLUENZA_A_DEL_NS1_INFECTION_UP	BLANCO_MELO_HUMAN_PARAINFLUENZA_VIRUS_3_INFECTION_A594_CELLS_UP	HECKER_IFNB1_TARGETS	BLANCO_MELO_COVID19_SARS_COV_2_INFECTION_CALU3_CELLS_UP	MOSERLE_IFNA_RESPONSE	FULCHER_INFLAMMATORY_RESPONSE_LECTIN_VS_LPS_DN	BLANCO_MELO_RESPIRATORY_SYNCYTIAL_VIRUS_INFECTION_A594_CELLS_UP			BROWNE_INTERFERON_RESPONSIVE_GENES	SANA_RESPONSE_TO_IFNG_UP	BLANCO_MELO_BETA_INTERFERON_TREATED_BRONCHIAL_EPITHELIAL_CELLS_UP	REACTOME_INTERFERON_SIGNALING
DDX58	BLANCO_MELO_BRONCHIAL_EPITHELIAL_CELLS_INFLUENZA_A_DEL_NS1_INFECTION_UP	BLANCO_MELO_HUMAN_PARAINFLUENZA_VIRUS_3_INFECTION_A594_CELLS_UP	HECKER_IFNB1_TARGETS	BLANCO_MELO_COVID19_SARS_COV_2_INFECTION_CALU3_CELLS_UP	MOSERLE_IFNA_RESPONSE	FULCHER_INFLAMMATORY_RESPONSE_LECTIN_VS_LPS_DN	BLANCO_MELO_RESPIRATORY_SYNCYTIAL_VIRUS_INFECTION_A594_CELLS_UP					BLANCO_MELO_BETA_INTERFERON_TREATED_BRONCHIAL_EPITHELIAL_CELLS_UP	REACTOME_INTERFERON_SIGNALING
OAS2	BLANCO_MELO_BRONCHIAL_EPITHELIAL_CELLS_INFLUENZA_A_DEL_NS1_INFECTION_UP	BLANCO_MELO_HUMAN_PARAINFLUENZA_VIRUS_3_INFECTION_A594_CELLS_UP	HECKER_IFNB1_TARGETS	BLANCO_MELO_COVID19_SARS_COV_2_INFECTION_CALU3_CELLS_UP	MOSERLE_IFNA_RESPONSE	FULCHER_INFLAMMATORY_RESPONSE_LECTIN_VS_LPS_DN		BLANCO_MELO_COVID19_SARS_COV_2_POS_PATIENT_LUNG_TISSUE_UP	BOSCO_INTERFERON_INDUCED_ANTIVIRAL_MODULE	BROWNE_INTERFERON_RESPONSIVE_GENES	SANA_RESPONSE_TO_IFNG_UP		REACTOME_INTERFERON_SIGNALING
EPSTI1	BLANCO_MELO_BRONCHIAL_EPITHELIAL_CELLS_INFLUENZA_A_DEL_NS1_INFECTION_UP	BLANCO_MELO_HUMAN_PARAINFLUENZA_VIRUS_3_INFECTION_A594_CELLS_UP	HECKER_IFNB1_TARGETS	BLANCO_MELO_COVID19_SARS_COV_2_INFECTION_CALU3_CELLS_UP	MOSERLE_IFNA_RESPONSE	FULCHER_INFLAMMATORY_RESPONSE_LECTIN_VS_LPS_DN		BLANCO_MELO_COVID19_SARS_COV_2_POS_PATIENT_LUNG_TISSUE_UP	BOSCO_INTERFERON_INDUCED_ANTIVIRAL_MODULE
IFIT5	BLANCO_MELO_BRONCHIAL_EPITHELIAL_CELLS_INFLUENZA_A_DEL_NS1_INFECTION_UP	BLANCO_MELO_HUMAN_PARAINFLUENZA_VIRUS_3_INFECTION_A594_CELLS_UP	HECKER_IFNB1_TARGETS	BLANCO_MELO_COVID19_SARS_COV_2_INFECTION_CALU3_CELLS_UP	MOSERLE_IFNA_RESPONSE	FULCHER_INFLAMMATORY_RESPONSE_LECTIN_VS_LPS_DN			BOSCO_INTERFERON_INDUCED_ANTIVIRAL_MODULE	BROWNE_INTERFERON_RESPONSIVE_GENES		BLANCO_MELO_BETA_INTERFERON_TREATED_BRONCHIAL_EPITHELIAL_CELLS_UP	REACTOME_INTERFERON_SIGNALING
STAT1	BLANCO_MELO_BRONCHIAL_EPITHELIAL_CELLS_INFLUENZA_A_DEL_NS1_INFECTION_UP	BLANCO_MELO_HUMAN_PARAINFLUENZA_VIRUS_3_INFECTION_A594_CELLS_UP	HECKER_IFNB1_TARGETS	BLANCO_MELO_COVID19_SARS_COV_2_INFECTION_CALU3_CELLS_UP	MOSERLE_IFNA_RESPONSE		BLANCO_MELO_RESPIRATORY_SYNCYTIAL_VIRUS_INFECTION_A594_CELLS_UP			BROWNE_INTERFERON_RESPONSIVE_GENES	SANA_RESPONSE_TO_IFNG_UP		REACTOME_INTERFERON_SIGNALING
OAS3	BLANCO_MELO_BRONCHIAL_EPITHELIAL_CELLS_INFLUENZA_A_DEL_NS1_INFECTION_UP	BLANCO_MELO_HUMAN_PARAINFLUENZA_VIRUS_3_INFECTION_A594_CELLS_UP	HECKER_IFNB1_TARGETS	BLANCO_MELO_COVID19_SARS_COV_2_INFECTION_CALU3_CELLS_UP		FULCHER_INFLAMMATORY_RESPONSE_LECTIN_VS_LPS_DN	BLANCO_MELO_RESPIRATORY_SYNCYTIAL_VIRUS_INFECTION_A594_CELLS_UP	BLANCO_MELO_COVID19_SARS_COV_2_POS_PATIENT_LUNG_TISSUE_UP	BOSCO_INTERFERON_INDUCED_ANTIVIRAL_MODULE			BLANCO_MELO_BETA_INTERFERON_TREATED_BRONCHIAL_EPITHELIAL_CELLS_UP	REACTOME_INTERFERON_SIGNALING
XAF1	BLANCO_MELO_BRONCHIAL_EPITHELIAL_CELLS_INFLUENZA_A_DEL_NS1_INFECTION_UP	BLANCO_MELO_HUMAN_PARAINFLUENZA_VIRUS_3_INFECTION_A594_CELLS_UP	HECKER_IFNB1_TARGETS	BLANCO_MELO_COVID19_SARS_COV_2_INFECTION_CALU3_CELLS_UP		FULCHER_INFLAMMATORY_RESPONSE_LECTIN_VS_LPS_DN	BLANCO_MELO_RESPIRATORY_SYNCYTIAL_VIRUS_INFECTION_A594_CELLS_UP		BOSCO_INTERFERON_INDUCED_ANTIVIRAL_MODULE	BROWNE_INTERFERON_RESPONSIVE_GENES		BLANCO_MELO_BETA_INTERFERON_TREATED_BRONCHIAL_EPITHELIAL_CELLS_UP	REACTOME_INTERFERON_SIGNALING
PARP12	BLANCO_MELO_BRONCHIAL_EPITHELIAL_CELLS_INFLUENZA_A_DEL_NS1_INFECTION_UP	BLANCO_MELO_HUMAN_PARAINFLUENZA_VIRUS_3_INFECTION_A594_CELLS_UP	HECKER_IFNB1_TARGETS	BLANCO_MELO_COVID19_SARS_COV_2_INFECTION_CALU3_CELLS_UP			BLANCO_MELO_RESPIRATORY_SYNCYTIAL_VIRUS_INFECTION_A594_CELLS_UP		BOSCO_INTERFERON_INDUCED_ANTIVIRAL_MODULE			BLANCO_MELO_BETA_INTERFERON_TREATED_BRONCHIAL_EPITHELIAL_CELLS_UP
PARP9	BLANCO_MELO_BRONCHIAL_EPITHELIAL_CELLS_INFLUENZA_A_DEL_NS1_INFECTION_UP	BLANCO_MELO_HUMAN_PARAINFLUENZA_VIRUS_3_INFECTION_A594_CELLS_UP	HECKER_IFNB1_TARGETS	BLANCO_MELO_COVID19_SARS_COV_2_INFECTION_CALU3_CELLS_UP			BLANCO_MELO_RESPIRATORY_SYNCYTIAL_VIRUS_INFECTION_A594_CELLS_UP				SANA_RESPONSE_TO_IFNG_UP	BLANCO_MELO_BETA_INTERFERON_TREATED_BRONCHIAL_EPITHELIAL_CELLS_UP
DTX3L	BLANCO_MELO_BRONCHIAL_EPITHELIAL_CELLS_INFLUENZA_A_DEL_NS1_INFECTION_UP	BLANCO_MELO_HUMAN_PARAINFLUENZA_VIRUS_3_INFECTION_A594_CELLS_UP	HECKER_IFNB1_TARGETS	BLANCO_MELO_COVID19_SARS_COV_2_INFECTION_CALU3_CELLS_UP			BLANCO_MELO_RESPIRATORY_SYNCYTIAL_VIRUS_INFECTION_A594_CELLS_UP				SANA_RESPONSE_TO_IFNG_UP	BLANCO_MELO_BETA_INTERFERON_TREATED_BRONCHIAL_EPITHELIAL_CELLS_UP
EIF2AK2	BLANCO_MELO_BRONCHIAL_EPITHELIAL_CELLS_INFLUENZA_A_DEL_NS1_INFECTION_UP	BLANCO_MELO_HUMAN_PARAINFLUENZA_VIRUS_3_INFECTION_A594_CELLS_UP	HECKER_IFNB1_TARGETS	BLANCO_MELO_COVID19_SARS_COV_2_INFECTION_CALU3_CELLS_UP				BLANCO_MELO_COVID19_SARS_COV_2_POS_PATIENT_LUNG_TISSUE_UP	BOSCO_INTERFERON_INDUCED_ANTIVIRAL_MODULE	BROWNE_INTERFERON_RESPONSIVE_GENES		BLANCO_MELO_BETA_INTERFERON_TREATED_BRONCHIAL_EPITHELIAL_CELLS_UP	REACTOME_INTERFERON_SIGNALING
CMPK2	BLANCO_MELO_BRONCHIAL_EPITHELIAL_CELLS_INFLUENZA_A_DEL_NS1_INFECTION_UP	BLANCO_MELO_HUMAN_PARAINFLUENZA_VIRUS_3_INFECTION_A594_CELLS_UP	HECKER_IFNB1_TARGETS	BLANCO_MELO_COVID19_SARS_COV_2_INFECTION_CALU3_CELLS_UP	MOSERLE_IFNA_RESPONSE	FULCHER_INFLAMMATORY_RESPONSE_LECTIN_VS_LPS_DN	BLANCO_MELO_RESPIRATORY_SYNCYTIAL_VIRUS_INFECTION_A594_CELLS_UP
RTP4	BLANCO_MELO_BRONCHIAL_EPITHELIAL_CELLS_INFLUENZA_A_DEL_NS1_INFECTION_UP	BLANCO_MELO_HUMAN_PARAINFLUENZA_VIRUS_3_INFECTION_A594_CELLS_UP	HECKER_IFNB1_TARGETS	BLANCO_MELO_COVID19_SARS_COV_2_INFECTION_CALU3_CELLS_UP	MOSERLE_IFNA_RESPONSE			BLANCO_MELO_COVID19_SARS_COV_2_POS_PATIENT_LUNG_TISSUE_UP				BLANCO_MELO_BETA_INTERFERON_TREATED_BRONCHIAL_EPITHELIAL_CELLS_UP
DHX58	BLANCO_MELO_BRONCHIAL_EPITHELIAL_CELLS_INFLUENZA_A_DEL_NS1_INFECTION_UP	BLANCO_MELO_HUMAN_PARAINFLUENZA_VIRUS_3_INFECTION_A594_CELLS_UP	HECKER_IFNB1_TARGETS	BLANCO_MELO_COVID19_SARS_COV_2_INFECTION_CALU3_CELLS_UP		FULCHER_INFLAMMATORY_RESPONSE_LECTIN_VS_LPS_DN	BLANCO_MELO_RESPIRATORY_SYNCYTIAL_VIRUS_INFECTION_A594_CELLS_UP		BOSCO_INTERFERON_INDUCED_ANTIVIRAL_MODULE			BLANCO_MELO_BETA_INTERFERON_TREATED_BRONCHIAL_EPITHELIAL_CELLS_UP
TMEM140	BLANCO_MELO_BRONCHIAL_EPITHELIAL_CELLS_INFLUENZA_A_DEL_NS1_INFECTION_UP	BLANCO_MELO_HUMAN_PARAINFLUENZA_VIRUS_3_INFECTION_A594_CELLS_UP	HECKER_IFNB1_TARGETS	BLANCO_MELO_COVID19_SARS_COV_2_INFECTION_CALU3_CELLS_UP		FULCHER_INFLAMMATORY_RESPONSE_LECTIN_VS_LPS_DN	BLANCO_MELO_RESPIRATORY_SYNCYTIAL_VIRUS_INFECTION_A594_CELLS_UP					BLANCO_MELO_BETA_INTERFERON_TREATED_BRONCHIAL_EPITHELIAL_CELLS_UP
PLSCR1	BLANCO_MELO_BRONCHIAL_EPITHELIAL_CELLS_INFLUENZA_A_DEL_NS1_INFECTION_UP	BLANCO_MELO_HUMAN_PARAINFLUENZA_VIRUS_3_INFECTION_A594_CELLS_UP	HECKER_IFNB1_TARGETS		MOSERLE_IFNA_RESPONSE					BROWNE_INTERFERON_RESPONSIVE_GENES		BLANCO_MELO_BETA_INTERFERON_TREATED_BRONCHIAL_EPITHELIAL_CELLS_UP
HERC6	BLANCO_MELO_BRONCHIAL_EPITHELIAL_CELLS_INFLUENZA_A_DEL_NS1_INFECTION_UP	BLANCO_MELO_HUMAN_PARAINFLUENZA_VIRUS_3_INFECTION_A594_CELLS_UP	HECKER_IFNB1_TARGETS			FULCHER_INFLAMMATORY_RESPONSE_LECTIN_VS_LPS_DN	BLANCO_MELO_RESPIRATORY_SYNCYTIAL_VIRUS_INFECTION_A594_CELLS_UP
IFITM1	BLANCO_MELO_BRONCHIAL_EPITHELIAL_CELLS_INFLUENZA_A_DEL_NS1_INFECTION_UP	BLANCO_MELO_HUMAN_PARAINFLUENZA_VIRUS_3_INFECTION_A594_CELLS_UP		BLANCO_MELO_COVID19_SARS_COV_2_INFECTION_CALU3_CELLS_UP	MOSERLE_IFNA_RESPONSE	FULCHER_INFLAMMATORY_RESPONSE_LECTIN_VS_LPS_DN	BLANCO_MELO_RESPIRATORY_SYNCYTIAL_VIRUS_INFECTION_A594_CELLS_UP	BLANCO_MELO_COVID19_SARS_COV_2_POS_PATIENT_LUNG_TISSUE_UP					REACTOME_INTERFERON_SIGNALING
IFIH1	BLANCO_MELO_BRONCHIAL_EPITHELIAL_CELLS_INFLUENZA_A_DEL_NS1_INFECTION_UP	BLANCO_MELO_HUMAN_PARAINFLUENZA_VIRUS_3_INFECTION_A594_CELLS_UP		BLANCO_MELO_COVID19_SARS_COV_2_INFECTION_CALU3_CELLS_UP	MOSERLE_IFNA_RESPONSE	FULCHER_INFLAMMATORY_RESPONSE_LECTIN_VS_LPS_DN	BLANCO_MELO_RESPIRATORY_SYNCYTIAL_VIRUS_INFECTION_A594_CELLS_UP		BOSCO_INTERFERON_INDUCED_ANTIVIRAL_MODULE		SANA_RESPONSE_TO_IFNG_UP	BLANCO_MELO_BETA_INTERFERON_TREATED_BRONCHIAL_EPITHELIAL_CELLS_UP
USP18	BLANCO_MELO_BRONCHIAL_EPITHELIAL_CELLS_INFLUENZA_A_DEL_NS1_INFECTION_UP	BLANCO_MELO_HUMAN_PARAINFLUENZA_VIRUS_3_INFECTION_A594_CELLS_UP		BLANCO_MELO_COVID19_SARS_COV_2_INFECTION_CALU3_CELLS_UP	MOSERLE_IFNA_RESPONSE	FULCHER_INFLAMMATORY_RESPONSE_LECTIN_VS_LPS_DN	BLANCO_MELO_RESPIRATORY_SYNCYTIAL_VIRUS_INFECTION_A594_CELLS_UP					BLANCO_MELO_BETA_INTERFERON_TREATED_BRONCHIAL_EPITHELIAL_CELLS_UP	REACTOME_INTERFERON_SIGNALING
BST2	BLANCO_MELO_BRONCHIAL_EPITHELIAL_CELLS_INFLUENZA_A_DEL_NS1_INFECTION_UP	BLANCO_MELO_HUMAN_PARAINFLUENZA_VIRUS_3_INFECTION_A594_CELLS_UP		BLANCO_MELO_COVID19_SARS_COV_2_INFECTION_CALU3_CELLS_UP			BLANCO_MELO_RESPIRATORY_SYNCYTIAL_VIRUS_INFECTION_A594_CELLS_UP			BROWNE_INTERFERON_RESPONSIVE_GENES	SANA_RESPONSE_TO_IFNG_UP		REACTOME_INTERFERON_SIGNALING
HELZ2	BLANCO_MELO_BRONCHIAL_EPITHELIAL_CELLS_INFLUENZA_A_DEL_NS1_INFECTION_UP	BLANCO_MELO_HUMAN_PARAINFLUENZA_VIRUS_3_INFECTION_A594_CELLS_UP		BLANCO_MELO_COVID19_SARS_COV_2_INFECTION_CALU3_CELLS_UP			BLANCO_MELO_RESPIRATORY_SYNCYTIAL_VIRUS_INFECTION_A594_CELLS_UP					BLANCO_MELO_BETA_INTERFERON_TREATED_BRONCHIAL_EPITHELIAL_CELLS_UP
TRIM22	BLANCO_MELO_BRONCHIAL_EPITHELIAL_CELLS_INFLUENZA_A_DEL_NS1_INFECTION_UP	BLANCO_MELO_HUMAN_PARAINFLUENZA_VIRUS_3_INFECTION_A594_CELLS_UP		BLANCO_MELO_COVID19_SARS_COV_2_INFECTION_CALU3_CELLS_UP	MOSERLE_IFNA_RESPONSE	FULCHER_INFLAMMATORY_RESPONSE_LECTIN_VS_LPS_DN	BLANCO_MELO_RESPIRATORY_SYNCYTIAL_VIRUS_INFECTION_A594_CELLS_UP		BOSCO_INTERFERON_INDUCED_ANTIVIRAL_MODULE	BROWNE_INTERFERON_RESPONSIVE_GENES	SANA_RESPONSE_TO_IFNG_UP		REACTOME_INTERFERON_SIGNALING
IFI16	BLANCO_MELO_BRONCHIAL_EPITHELIAL_CELLS_INFLUENZA_A_DEL_NS1_INFECTION_UP	BLANCO_MELO_HUMAN_PARAINFLUENZA_VIRUS_3_INFECTION_A594_CELLS_UP		BLANCO_MELO_COVID19_SARS_COV_2_INFECTION_CALU3_CELLS_UP	MOSERLE_IFNA_RESPONSE	FULCHER_INFLAMMATORY_RESPONSE_LECTIN_VS_LPS_DN	BLANCO_MELO_RESPIRATORY_SYNCYTIAL_VIRUS_INFECTION_A594_CELLS_UP					BLANCO_MELO_BETA_INTERFERON_TREATED_BRONCHIAL_EPITHELIAL_CELLS_UP
STAT2	BLANCO_MELO_BRONCHIAL_EPITHELIAL_CELLS_INFLUENZA_A_DEL_NS1_INFECTION_UP	BLANCO_MELO_HUMAN_PARAINFLUENZA_VIRUS_3_INFECTION_A594_CELLS_UP		BLANCO_MELO_COVID19_SARS_COV_2_INFECTION_CALU3_CELLS_UP			BLANCO_MELO_RESPIRATORY_SYNCYTIAL_VIRUS_INFECTION_A594_CELLS_UP		BOSCO_INTERFERON_INDUCED_ANTIVIRAL_MODULE			BLANCO_MELO_BETA_INTERFERON_TREATED_BRONCHIAL_EPITHELIAL_CELLS_UP	REACTOME_INTERFERON_SIGNALING
PARP14	BLANCO_MELO_BRONCHIAL_EPITHELIAL_CELLS_INFLUENZA_A_DEL_NS1_INFECTION_UP	BLANCO_MELO_HUMAN_PARAINFLUENZA_VIRUS_3_INFECTION_A594_CELLS_UP		BLANCO_MELO_COVID19_SARS_COV_2_INFECTION_CALU3_CELLS_UP			BLANCO_MELO_RESPIRATORY_SYNCYTIAL_VIRUS_INFECTION_A594_CELLS_UP				SANA_RESPONSE_TO_IFNG_UP
BATF2	BLANCO_MELO_BRONCHIAL_EPITHELIAL_CELLS_INFLUENZA_A_DEL_NS1_INFECTION_UP	BLANCO_MELO_HUMAN_PARAINFLUENZA_VIRUS_3_INFECTION_A594_CELLS_UP		BLANCO_MELO_COVID19_SARS_COV_2_INFECTION_CALU3_CELLS_UP			BLANCO_MELO_RESPIRATORY_SYNCYTIAL_VIRUS_INFECTION_A594_CELLS_UP				SANA_RESPONSE_TO_IFNG_UP	BLANCO_MELO_BETA_INTERFERON_TREATED_BRONCHIAL_EPITHELIAL_CELLS_UP
TDRD7	BLANCO_MELO_BRONCHIAL_EPITHELIAL_CELLS_INFLUENZA_A_DEL_NS1_INFECTION_UP	BLANCO_MELO_HUMAN_PARAINFLUENZA_VIRUS_3_INFECTION_A594_CELLS_UP		BLANCO_MELO_COVID19_SARS_COV_2_INFECTION_CALU3_CELLS_UP					BOSCO_INTERFERON_INDUCED_ANTIVIRAL_MODULE	BROWNE_INTERFERON_RESPONSIVE_GENES		BLANCO_MELO_BETA_INTERFERON_TREATED_BRONCHIAL_EPITHELIAL_CELLS_UP
TNFSF10	BLANCO_MELO_BRONCHIAL_EPITHELIAL_CELLS_INFLUENZA_A_DEL_NS1_INFECTION_UP	BLANCO_MELO_HUMAN_PARAINFLUENZA_VIRUS_3_INFECTION_A594_CELLS_UP		BLANCO_MELO_COVID19_SARS_COV_2_INFECTION_CALU3_CELLS_UP	MOSERLE_IFNA_RESPONSE	FULCHER_INFLAMMATORY_RESPONSE_LECTIN_VS_LPS_DN	BLANCO_MELO_RESPIRATORY_SYNCYTIAL_VIRUS_INFECTION_A594_CELLS_UP	BLANCO_MELO_COVID19_SARS_COV_2_POS_PATIENT_LUNG_TISSUE_UP	BOSCO_INTERFERON_INDUCED_ANTIVIRAL_MODULE	BROWNE_INTERFERON_RESPONSIVE_GENES	SANA_RESPONSE_TO_IFNG_UP	BLANCO_MELO_BETA_INTERFERON_TREATED_BRONCHIAL_EPITHELIAL_CELLS_UP
UBE2L6	BLANCO_MELO_BRONCHIAL_EPITHELIAL_CELLS_INFLUENZA_A_DEL_NS1_INFECTION_UP	BLANCO_MELO_HUMAN_PARAINFLUENZA_VIRUS_3_INFECTION_A594_CELLS_UP		BLANCO_MELO_COVID19_SARS_COV_2_INFECTION_CALU3_CELLS_UP		FULCHER_INFLAMMATORY_RESPONSE_LECTIN_VS_LPS_DN	BLANCO_MELO_RESPIRATORY_SYNCYTIAL_VIRUS_INFECTION_A594_CELLS_UP			BROWNE_INTERFERON_RESPONSIVE_GENES	SANA_RESPONSE_TO_IFNG_UP		REACTOME_INTERFERON_SIGNALING
NT5C3A	BLANCO_MELO_BRONCHIAL_EPITHELIAL_CELLS_INFLUENZA_A_DEL_NS1_INFECTION_UP	BLANCO_MELO_HUMAN_PARAINFLUENZA_VIRUS_3_INFECTION_A594_CELLS_UP		BLANCO_MELO_COVID19_SARS_COV_2_INFECTION_CALU3_CELLS_UP		FULCHER_INFLAMMATORY_RESPONSE_LECTIN_VS_LPS_DN		BLANCO_MELO_COVID19_SARS_COV_2_POS_PATIENT_LUNG_TISSUE_UP				BLANCO_MELO_BETA_INTERFERON_TREATED_BRONCHIAL_EPITHELIAL_CELLS_UP
TRIM5	BLANCO_MELO_BRONCHIAL_EPITHELIAL_CELLS_INFLUENZA_A_DEL_NS1_INFECTION_UP	BLANCO_MELO_HUMAN_PARAINFLUENZA_VIRUS_3_INFECTION_A594_CELLS_UP		BLANCO_MELO_COVID19_SARS_COV_2_INFECTION_CALU3_CELLS_UP		FULCHER_INFLAMMATORY_RESPONSE_LECTIN_VS_LPS_DN						BLANCO_MELO_BETA_INTERFERON_TREATED_BRONCHIAL_EPITHELIAL_CELLS_UP	REACTOME_INTERFERON_SIGNALING
APOL6	BLANCO_MELO_BRONCHIAL_EPITHELIAL_CELLS_INFLUENZA_A_DEL_NS1_INFECTION_UP	BLANCO_MELO_HUMAN_PARAINFLUENZA_VIRUS_3_INFECTION_A594_CELLS_UP		BLANCO_MELO_COVID19_SARS_COV_2_INFECTION_CALU3_CELLS_UP			BLANCO_MELO_RESPIRATORY_SYNCYTIAL_VIRUS_INFECTION_A594_CELLS_UP		BOSCO_INTERFERON_INDUCED_ANTIVIRAL_MODULE			BLANCO_MELO_BETA_INTERFERON_TREATED_BRONCHIAL_EPITHELIAL_CELLS_UP
TRIM21	BLANCO_MELO_BRONCHIAL_EPITHELIAL_CELLS_INFLUENZA_A_DEL_NS1_INFECTION_UP	BLANCO_MELO_HUMAN_PARAINFLUENZA_VIRUS_3_INFECTION_A594_CELLS_UP		BLANCO_MELO_COVID19_SARS_COV_2_INFECTION_CALU3_CELLS_UP						BROWNE_INTERFERON_RESPONSIVE_GENES		BLANCO_MELO_BETA_INTERFERON_TREATED_BRONCHIAL_EPITHELIAL_CELLS_UP	REACTOME_INTERFERON_SIGNALING
ETV7	BLANCO_MELO_BRONCHIAL_EPITHELIAL_CELLS_INFLUENZA_A_DEL_NS1_INFECTION_UP	BLANCO_MELO_HUMAN_PARAINFLUENZA_VIRUS_3_INFECTION_A594_CELLS_UP		BLANCO_MELO_COVID19_SARS_COV_2_INFECTION_CALU3_CELLS_UP							SANA_RESPONSE_TO_IFNG_UP
PHF11	BLANCO_MELO_BRONCHIAL_EPITHELIAL_CELLS_INFLUENZA_A_DEL_NS1_INFECTION_UP	BLANCO_MELO_HUMAN_PARAINFLUENZA_VIRUS_3_INFECTION_A594_CELLS_UP		BLANCO_MELO_COVID19_SARS_COV_2_INFECTION_CALU3_CELLS_UP								BLANCO_MELO_BETA_INTERFERON_TREATED_BRONCHIAL_EPITHELIAL_CELLS_UP
GBP3	BLANCO_MELO_BRONCHIAL_EPITHELIAL_CELLS_INFLUENZA_A_DEL_NS1_INFECTION_UP	BLANCO_MELO_HUMAN_PARAINFLUENZA_VIRUS_3_INFECTION_A594_CELLS_UP					BLANCO_MELO_RESPIRATORY_SYNCYTIAL_VIRUS_INFECTION_A594_CELLS_UP				SANA_RESPONSE_TO_IFNG_UP	BLANCO_MELO_BETA_INTERFERON_TREATED_BRONCHIAL_EPITHELIAL_CELLS_UP	REACTOME_INTERFERON_SIGNALING
IFITM3	BLANCO_MELO_BRONCHIAL_EPITHELIAL_CELLS_INFLUENZA_A_DEL_NS1_INFECTION_UP	BLANCO_MELO_HUMAN_PARAINFLUENZA_VIRUS_3_INFECTION_A594_CELLS_UP				FULCHER_INFLAMMATORY_RESPONSE_LECTIN_VS_LPS_DN		BLANCO_MELO_COVID19_SARS_COV_2_POS_PATIENT_LUNG_TISSUE_UP	BOSCO_INTERFERON_INDUCED_ANTIVIRAL_MODULE				REACTOME_INTERFERON_SIGNALING
NMI	BLANCO_MELO_BRONCHIAL_EPITHELIAL_CELLS_INFLUENZA_A_DEL_NS1_INFECTION_UP	BLANCO_MELO_HUMAN_PARAINFLUENZA_VIRUS_3_INFECTION_A594_CELLS_UP				FULCHER_INFLAMMATORY_RESPONSE_LECTIN_VS_LPS_DN				BROWNE_INTERFERON_RESPONSIVE_GENES		BLANCO_MELO_BETA_INTERFERON_TREATED_BRONCHIAL_EPITHELIAL_CELLS_UP
CEACAM1	BLANCO_MELO_BRONCHIAL_EPITHELIAL_CELLS_INFLUENZA_A_DEL_NS1_INFECTION_UP	BLANCO_MELO_HUMAN_PARAINFLUENZA_VIRUS_3_INFECTION_A594_CELLS_UP					BLANCO_MELO_RESPIRATORY_SYNCYTIAL_VIRUS_INFECTION_A594_CELLS_UP	BLANCO_MELO_COVID19_SARS_COV_2_POS_PATIENT_LUNG_TISSUE_UP			SANA_RESPONSE_TO_IFNG_UP
APOL1	BLANCO_MELO_BRONCHIAL_EPITHELIAL_CELLS_INFLUENZA_A_DEL_NS1_INFECTION_UP	BLANCO_MELO_HUMAN_PARAINFLUENZA_VIRUS_3_INFECTION_A594_CELLS_UP					BLANCO_MELO_RESPIRATORY_SYNCYTIAL_VIRUS_INFECTION_A594_CELLS_UP		BOSCO_INTERFERON_INDUCED_ANTIVIRAL_MODULE		SANA_RESPONSE_TO_IFNG_UP
BTN3A3	BLANCO_MELO_BRONCHIAL_EPITHELIAL_CELLS_INFLUENZA_A_DEL_NS1_INFECTION_UP	BLANCO_MELO_HUMAN_PARAINFLUENZA_VIRUS_3_INFECTION_A594_CELLS_UP
BTN3A1	BLANCO_MELO_BRONCHIAL_EPITHELIAL_CELLS_INFLUENZA_A_DEL_NS1_INFECTION_UP	BLANCO_MELO_HUMAN_PARAINFLUENZA_VIRUS_3_INFECTION_A594_CELLS_UP
IFI35	BLANCO_MELO_BRONCHIAL_EPITHELIAL_CELLS_INFLUENZA_A_DEL_NS1_INFECTION_UP		HECKER_IFNB1_TARGETS	BLANCO_MELO_COVID19_SARS_COV_2_INFECTION_CALU3_CELLS_UP					BOSCO_INTERFERON_INDUCED_ANTIVIRAL_MODULE	BROWNE_INTERFERON_RESPONSIVE_GENES	SANA_RESPONSE_TO_IFNG_UP		REACTOME_INTERFERON_SIGNALING
ZBP1	BLANCO_MELO_BRONCHIAL_EPITHELIAL_CELLS_INFLUENZA_A_DEL_NS1_INFECTION_UP		HECKER_IFNB1_TARGETS	BLANCO_MELO_COVID19_SARS_COV_2_INFECTION_CALU3_CELLS_UP				BLANCO_MELO_COVID19_SARS_COV_2_POS_PATIENT_LUNG_TISSUE_UP	BOSCO_INTERFERON_INDUCED_ANTIVIRAL_MODULE			BLANCO_MELO_BETA_INTERFERON_TREATED_BRONCHIAL_EPITHELIAL_CELLS_UP
IFI27	BLANCO_MELO_BRONCHIAL_EPITHELIAL_CELLS_INFLUENZA_A_DEL_NS1_INFECTION_UP		HECKER_IFNB1_TARGETS			FULCHER_INFLAMMATORY_RESPONSE_LECTIN_VS_LPS_DN				BROWNE_INTERFERON_RESPONSIVE_GENES			REACTOME_INTERFERON_SIGNALING
LGALS3BP	BLANCO_MELO_BRONCHIAL_EPITHELIAL_CELLS_INFLUENZA_A_DEL_NS1_INFECTION_UP		HECKER_IFNB1_TARGETS			FULCHER_INFLAMMATORY_RESPONSE_LECTIN_VS_LPS_DN					SANA_RESPONSE_TO_IFNG_UP
LY6E	BLANCO_MELO_BRONCHIAL_EPITHELIAL_CELLS_INFLUENZA_A_DEL_NS1_INFECTION_UP		HECKER_IFNB1_TARGETS			FULCHER_INFLAMMATORY_RESPONSE_LECTIN_VS_LPS_DN
IFI6	BLANCO_MELO_BRONCHIAL_EPITHELIAL_CELLS_INFLUENZA_A_DEL_NS1_INFECTION_UP		HECKER_IFNB1_TARGETS					BLANCO_MELO_COVID19_SARS_COV_2_POS_PATIENT_LUNG_TISSUE_UP	BOSCO_INTERFERON_INDUCED_ANTIVIRAL_MODULE	BROWNE_INTERFERON_RESPONSIVE_GENES			REACTOME_INTERFERON_SIGNALING
APOBEC3A	BLANCO_MELO_BRONCHIAL_EPITHELIAL_CELLS_INFLUENZA_A_DEL_NS1_INFECTION_UP		HECKER_IFNB1_TARGETS			FULCHER_INFLAMMATORY_RESPONSE_LECTIN_VS_LPS_DN		BLANCO_MELO_COVID19_SARS_COV_2_POS_PATIENT_LUNG_TISSUE_UP				BLANCO_MELO_BETA_INTERFERON_TREATED_BRONCHIAL_EPITHELIAL_CELLS_UP
C3AR1	BLANCO_MELO_BRONCHIAL_EPITHELIAL_CELLS_INFLUENZA_A_DEL_NS1_INFECTION_UP		HECKER_IFNB1_TARGETS			FULCHER_INFLAMMATORY_RESPONSE_LECTIN_VS_LPS_DN		BLANCO_MELO_COVID19_SARS_COV_2_POS_PATIENT_LUNG_TISSUE_UP
TYMP	BLANCO_MELO_BRONCHIAL_EPITHELIAL_CELLS_INFLUENZA_A_DEL_NS1_INFECTION_UP		HECKER_IFNB1_TARGETS							BROWNE_INTERFERON_RESPONSIVE_GENES
PML	BLANCO_MELO_BRONCHIAL_EPITHELIAL_CELLS_INFLUENZA_A_DEL_NS1_INFECTION_UP			BLANCO_MELO_COVID19_SARS_COV_2_INFECTION_CALU3_CELLS_UP					BOSCO_INTERFERON_INDUCED_ANTIVIRAL_MODULE	BROWNE_INTERFERON_RESPONSIVE_GENES		BLANCO_MELO_BETA_INTERFERON_TREATED_BRONCHIAL_EPITHELIAL_CELLS_UP	REACTOME_INTERFERON_SIGNALING
SPRY2	BLANCO_MELO_BRONCHIAL_EPITHELIAL_CELLS_INFLUENZA_A_DEL_NS1_INFECTION_UP			BLANCO_MELO_COVID19_SARS_COV_2_INFECTION_CALU3_CELLS_UP								BLANCO_MELO_BETA_INTERFERON_TREATED_BRONCHIAL_EPITHELIAL_CELLS_UP
FAP	BLANCO_MELO_BRONCHIAL_EPITHELIAL_CELLS_INFLUENZA_A_DEL_NS1_INFECTION_UP			BLANCO_MELO_COVID19_SARS_COV_2_INFECTION_CALU3_CELLS_UP
KLHDC7B	BLANCO_MELO_BRONCHIAL_EPITHELIAL_CELLS_INFLUENZA_A_DEL_NS1_INFECTION_UP			BLANCO_MELO_COVID19_SARS_COV_2_INFECTION_CALU3_CELLS_UP
ZNF442	BLANCO_MELO_BRONCHIAL_EPITHELIAL_CELLS_INFLUENZA_A_DEL_NS1_INFECTION_UP			BLANCO_MELO_COVID19_SARS_COV_2_INFECTION_CALU3_CELLS_UP
FBXO6	BLANCO_MELO_BRONCHIAL_EPITHELIAL_CELLS_INFLUENZA_A_DEL_NS1_INFECTION_UP
AIM2	BLANCO_MELO_BRONCHIAL_EPITHELIAL_CELLS_INFLUENZA_A_DEL_NS1_INFECTION_UP					FULCHER_INFLAMMATORY_RESPONSE_LECTIN_VS_LPS_DN						BLANCO_MELO_BETA_INTERFERON_TREATED_BRONCHIAL_EPITHELIAL_CELLS_UP
APOL2	BLANCO_MELO_BRONCHIAL_EPITHELIAL_CELLS_INFLUENZA_A_DEL_NS1_INFECTION_UP						BLANCO_MELO_RESPIRATORY_SYNCYTIAL_VIRUS_INFECTION_A594_CELLS_UP				SANA_RESPONSE_TO_IFNG_UP	BLANCO_MELO_BETA_INTERFERON_TREATED_BRONCHIAL_EPITHELIAL_CELLS_UP
C3	BLANCO_MELO_BRONCHIAL_EPITHELIAL_CELLS_INFLUENZA_A_DEL_NS1_INFECTION_UP						BLANCO_MELO_RESPIRATORY_SYNCYTIAL_VIRUS_INFECTION_A594_CELLS_UP					BLANCO_MELO_BETA_INTERFERON_TREATED_BRONCHIAL_EPITHELIAL_CELLS_UP
HSPA6	BLANCO_MELO_BRONCHIAL_EPITHELIAL_CELLS_INFLUENZA_A_DEL_NS1_INFECTION_UP						BLANCO_MELO_RESPIRATORY_SYNCYTIAL_VIRUS_INFECTION_A594_CELLS_UP
CARD17	BLANCO_MELO_BRONCHIAL_EPITHELIAL_CELLS_INFLUENZA_A_DEL_NS1_INFECTION_UP							BLANCO_MELO_COVID19_SARS_COV_2_POS_PATIENT_LUNG_TISSUE_UP
IL15	BLANCO_MELO_BRONCHIAL_EPITHELIAL_CELLS_INFLUENZA_A_DEL_NS1_INFECTION_UP									BROWNE_INTERFERON_RESPONSIVE_GENES		BLANCO_MELO_BETA_INTERFERON_TREATED_BRONCHIAL_EPITHELIAL_CELLS_UP
PSMB9	BLANCO_MELO_BRONCHIAL_EPITHELIAL_CELLS_INFLUENZA_A_DEL_NS1_INFECTION_UP									BROWNE_INTERFERON_RESPONSIVE_GENES
SEPTIN4	BLANCO_MELO_BRONCHIAL_EPITHELIAL_CELLS_INFLUENZA_A_DEL_NS1_INFECTION_UP										SANA_RESPONSE_TO_IFNG_UP
KIAA0040	BLANCO_MELO_BRONCHIAL_EPITHELIAL_CELLS_INFLUENZA_A_DEL_NS1_INFECTION_UP											BLANCO_MELO_BETA_INTERFERON_TREATED_BRONCHIAL_EPITHELIAL_CELLS_UP
ZCCHC2	BLANCO_MELO_BRONCHIAL_EPITHELIAL_CELLS_INFLUENZA_A_DEL_NS1_INFECTION_UP											BLANCO_MELO_BETA_INTERFERON_TREATED_BRONCHIAL_EPITHELIAL_CELLS_UP
CCNA1	BLANCO_MELO_BRONCHIAL_EPITHELIAL_CELLS_INFLUENZA_A_DEL_NS1_INFECTION_UP											BLANCO_MELO_BETA_INTERFERON_TREATED_BRONCHIAL_EPITHELIAL_CELLS_UP
GALM	BLANCO_MELO_BRONCHIAL_EPITHELIAL_CELLS_INFLUENZA_A_DEL_NS1_INFECTION_UP											BLANCO_MELO_BETA_INTERFERON_TREATED_BRONCHIAL_EPITHELIAL_CELLS_UP
GRB10	BLANCO_MELO_BRONCHIAL_EPITHELIAL_CELLS_INFLUENZA_A_DEL_NS1_INFECTION_UP
H3C4	BLANCO_MELO_BRONCHIAL_EPITHELIAL_CELLS_INFLUENZA_A_DEL_NS1_INFECTION_UP
HLA-DOB	BLANCO_MELO_BRONCHIAL_EPITHELIAL_CELLS_INFLUENZA_A_DEL_NS1_INFECTION_UP
CALCRL	BLANCO_MELO_BRONCHIAL_EPITHELIAL_CELLS_INFLUENZA_A_DEL_NS1_INFECTION_UP
RGS16	BLANCO_MELO_BRONCHIAL_EPITHELIAL_CELLS_INFLUENZA_A_DEL_NS1_INFECTION_UP
HNRNPLL	BLANCO_MELO_BRONCHIAL_EPITHELIAL_CELLS_INFLUENZA_A_DEL_NS1_INFECTION_UP
EFNA1	BLANCO_MELO_BRONCHIAL_EPITHELIAL_CELLS_INFLUENZA_A_DEL_NS1_INFECTION_UP
ZNF844	BLANCO_MELO_BRONCHIAL_EPITHELIAL_CELLS_INFLUENZA_A_DEL_NS1_INFECTION_UP
MARCHF3	BLANCO_MELO_BRONCHIAL_EPITHELIAL_CELLS_INFLUENZA_A_DEL_NS1_INFECTION_UP
STOML1	BLANCO_MELO_BRONCHIAL_EPITHELIAL_CELLS_INFLUENZA_A_DEL_NS1_INFECTION_UP
RNF122	BLANCO_MELO_BRONCHIAL_EPITHELIAL_CELLS_INFLUENZA_A_DEL_NS1_INFECTION_UP
TRIM69	BLANCO_MELO_BRONCHIAL_EPITHELIAL_CELLS_INFLUENZA_A_DEL_NS1_INFECTION_UP
SAMD9		BLANCO_MELO_HUMAN_PARAINFLUENZA_VIRUS_3_INFECTION_A594_CELLS_UP	HECKER_IFNB1_TARGETS	BLANCO_MELO_COVID19_SARS_COV_2_INFECTION_CALU3_CELLS_UP	MOSERLE_IFNA_RESPONSE	FULCHER_INFLAMMATORY_RESPONSE_LECTIN_VS_LPS_DN	BLANCO_MELO_RESPIRATORY_SYNCYTIAL_VIRUS_INFECTION_A594_CELLS_UP	BLANCO_MELO_COVID19_SARS_COV_2_POS_PATIENT_LUNG_TISSUE_UP				BLANCO_MELO_BETA_INTERFERON_TREATED_BRONCHIAL_EPITHELIAL_CELLS_UP
DDX60		BLANCO_MELO_HUMAN_PARAINFLUENZA_VIRUS_3_INFECTION_A594_CELLS_UP	HECKER_IFNB1_TARGETS	BLANCO_MELO_COVID19_SARS_COV_2_INFECTION_CALU3_CELLS_UP	MOSERLE_IFNA_RESPONSE		BLANCO_MELO_RESPIRATORY_SYNCYTIAL_VIRUS_INFECTION_A594_CELLS_UP		BOSCO_INTERFERON_INDUCED_ANTIVIRAL_MODULE		SANA_RESPONSE_TO_IFNG_UP
SERPING1		BLANCO_MELO_HUMAN_PARAINFLUENZA_VIRUS_3_INFECTION_A594_CELLS_UP	HECKER_IFNB1_TARGETS			FULCHER_INFLAMMATORY_RESPONSE_LECTIN_VS_LPS_DN	BLANCO_MELO_RESPIRATORY_SYNCYTIAL_VIRUS_INFECTION_A594_CELLS_UP				SANA_RESPONSE_TO_IFNG_UP
TNFAIP6		BLANCO_MELO_HUMAN_PARAINFLUENZA_VIRUS_3_INFECTION_A594_CELLS_UP	HECKER_IFNB1_TARGETS			FULCHER_INFLAMMATORY_RESPONSE_LECTIN_VS_LPS_DN
CXCL11		BLANCO_MELO_HUMAN_PARAINFLUENZA_VIRUS_3_INFECTION_A594_CELLS_UP		BLANCO_MELO_COVID19_SARS_COV_2_INFECTION_CALU3_CELLS_UP		FULCHER_INFLAMMATORY_RESPONSE_LECTIN_VS_LPS_DN	BLANCO_MELO_RESPIRATORY_SYNCYTIAL_VIRUS_INFECTION_A594_CELLS_UP				SANA_RESPONSE_TO_IFNG_UP
CFB		BLANCO_MELO_HUMAN_PARAINFLUENZA_VIRUS_3_INFECTION_A594_CELLS_UP				FULCHER_INFLAMMATORY_RESPONSE_LECTIN_VS_LPS_DN	BLANCO_MELO_RESPIRATORY_SYNCYTIAL_VIRUS_INFECTION_A594_CELLS_UP
CLMP		BLANCO_MELO_HUMAN_PARAINFLUENZA_VIRUS_3_INFECTION_A594_CELLS_UP					BLANCO_MELO_RESPIRATORY_SYNCYTIAL_VIRUS_INFECTION_A594_CELLS_UP
HCP5		BLANCO_MELO_HUMAN_PARAINFLUENZA_VIRUS_3_INFECTION_A594_CELLS_UP
CD163			HECKER_IFNB1_TARGETS			FULCHER_INFLAMMATORY_RESPONSE_LECTIN_VS_LPS_DN
SIGLEC1			HECKER_IFNB1_TARGETS			FULCHER_INFLAMMATORY_RESPONSE_LECTIN_VS_LPS_DN
STAP1			HECKER_IFNB1_TARGETS					BLANCO_MELO_COVID19_SARS_COV_2_POS_PATIENT_LUNG_TISSUE_UP
C1QB			HECKER_IFNB1_TARGETS
JUP			HECKER_IFNB1_TARGETS
C1QC			HECKER_IFNB1_TARGETS
CLEC4E				BLANCO_MELO_COVID19_SARS_COV_2_INFECTION_CALU3_CELLS_UP				BLANCO_MELO_COVID19_SARS_COV_2_POS_PATIENT_LUNG_TISSUE_UP
THBS1				BLANCO_MELO_COVID19_SARS_COV_2_INFECTION_CALU3_CELLS_UP								BLANCO_MELO_BETA_INTERFERON_TREATED_BRONCHIAL_EPITHELIAL_CELLS_UP
MT2A				BLANCO_MELO_COVID19_SARS_COV_2_INFECTION_CALU3_CELLS_UP									REACTOME_INTERFERON_SIGNALING
NAV2				BLANCO_MELO_COVID19_SARS_COV_2_INFECTION_CALU3_CELLS_UP
UBQLNL				BLANCO_MELO_COVID19_SARS_COV_2_INFECTION_CALU3_CELLS_UP
GBP1P1				BLANCO_MELO_COVID19_SARS_COV_2_INFECTION_CALU3_CELLS_UP
BAMBI
BISPR
CTSG
PCDH9
VNN1
SPATS2L
SHISA5
HMCN1
TMIGD3
SAMD4A						FULCHER_INFLAMMATORY_RESPONSE_LECTIN_VS_LPS_DN	BLANCO_MELO_RESPIRATORY_SYNCYTIAL_VIRUS_INFECTION_A594_CELLS_UP
NBN						FULCHER_INFLAMMATORY_RESPONSE_LECTIN_VS_LPS_DN		BLANCO_MELO_COVID19_SARS_COV_2_POS_PATIENT_LUNG_TISSUE_UP
HESX1						FULCHER_INFLAMMATORY_RESPONSE_LECTIN_VS_LPS_DN		BLANCO_MELO_COVID19_SARS_COV_2_POS_PATIENT_LUNG_TISSUE_UP
TASL						FULCHER_INFLAMMATORY_RESPONSE_LECTIN_VS_LPS_DN		BLANCO_MELO_COVID19_SARS_COV_2_POS_PATIENT_LUNG_TISSUE_UP
VAMP5						FULCHER_INFLAMMATORY_RESPONSE_LECTIN_VS_LPS_DN					SANA_RESPONSE_TO_IFNG_UP
GPNMB						FULCHER_INFLAMMATORY_RESPONSE_LECTIN_VS_LPS_DN
H2BC5						FULCHER_INFLAMMATORY_RESPONSE_LECTIN_VS_LPS_DN
SPTLC2						FULCHER_INFLAMMATORY_RESPONSE_LECTIN_VS_LPS_DN
DDAH2						FULCHER_INFLAMMATORY_RESPONSE_LECTIN_VS_LPS_DN
CES1						FULCHER_INFLAMMATORY_RESPONSE_LECTIN_VS_LPS_DN
KLHDC8B						FULCHER_INFLAMMATORY_RESPONSE_LECTIN_VS_LPS_DN
WSB1						FULCHER_INFLAMMATORY_RESPONSE_LECTIN_VS_LPS_DN
SEPHS2						FULCHER_INFLAMMATORY_RESPONSE_LECTIN_VS_LPS_DN
C2						FULCHER_INFLAMMATORY_RESPONSE_LECTIN_VS_LPS_DN
IRF2BPL						FULCHER_INFLAMMATORY_RESPONSE_LECTIN_VS_LPS_DN
C9orf64						FULCHER_INFLAMMATORY_RESPONSE_LECTIN_VS_LPS_DN
SDC4							BLANCO_MELO_RESPIRATORY_SYNCYTIAL_VIRUS_INFECTION_A594_CELLS_UP					BLANCO_MELO_BETA_INTERFERON_TREATED_BRONCHIAL_EPITHELIAL_CELLS_UP
ZBTB32							BLANCO_MELO_RESPIRATORY_SYNCYTIAL_VIRUS_INFECTION_A594_CELLS_UP
RNASE2								BLANCO_MELO_COVID19_SARS_COV_2_POS_PATIENT_LUNG_TISSUE_UP
ANKRD22								BLANCO_MELO_COVID19_SARS_COV_2_POS_PATIENT_LUNG_TISSUE_UP
CLEC4D								BLANCO_MELO_COVID19_SARS_COV_2_POS_PATIENT_LUNG_TISSUE_UP
GAPT								BLANCO_MELO_COVID19_SARS_COV_2_POS_PATIENT_LUNG_TISSUE_UP
CACNA1A								BLANCO_MELO_COVID19_SARS_COV_2_POS_PATIENT_LUNG_TISSUE_UP
MAP2K6								BLANCO_MELO_COVID19_SARS_COV_2_POS_PATIENT_LUNG_TISSUE_UP
PSTPIP2								BLANCO_MELO_COVID19_SARS_COV_2_POS_PATIENT_LUNG_TISSUE_UP
RGS18								BLANCO_MELO_COVID19_SARS_COV_2_POS_PATIENT_LUNG_TISSUE_UP
RNASE3								BLANCO_MELO_COVID19_SARS_COV_2_POS_PATIENT_LUNG_TISSUE_UP
MIR3945HG								BLANCO_MELO_COVID19_SARS_COV_2_POS_PATIENT_LUNG_TISSUE_UP
LILRA6								BLANCO_MELO_COVID19_SARS_COV_2_POS_PATIENT_LUNG_TISSUE_UP
SLC26A8								BLANCO_MELO_COVID19_SARS_COV_2_POS_PATIENT_LUNG_TISSUE_UP
ZDHHC19								BLANCO_MELO_COVID19_SARS_COV_2_POS_PATIENT_LUNG_TISSUE_UP
LINC01093								BLANCO_MELO_COVID19_SARS_COV_2_POS_PATIENT_LUNG_TISSUE_UP
TRAFD1									BOSCO_INTERFERON_INDUCED_ANTIVIRAL_MODULE
MOV10									BOSCO_INTERFERON_INDUCED_ANTIVIRAL_MODULE
SDC3									BOSCO_INTERFERON_INDUCED_ANTIVIRAL_MODULE
KPTN									BOSCO_INTERFERON_INDUCED_ANTIVIRAL_MODULE
FN1
DHRS9
NEXN
TDRD9
TIMP3
ARL4A
ZNF93
EPCAM
MELK										BROWNE_INTERFERON_RESPONSIVE_GENES
SSPN											SANA_RESPONSE_TO_IFNG_UP
TRIM6													REACTOME_INTERFERON_SIGNALING
MT1X
SLC1A3
LGALSL
CHMP5
AGRN
EPHB2
SOCS5
CA12
PRKCE
FOXC1
LHFPL2
H2BC17
MACIR
GBP6													REACTOME_INTERFERON_SIGNALING

## Sheet: GSEA-C5
Gene Set Name	# Genes in Gene Set (K)	Description	# Genes in Overlap (k)	k/K	p-value	FDR q-value
GOBP_DEFENSE_RESPONSE	1790	Reactions, triggered in response to the presence of a foreign body or the occurrence of an injury, which result in restriction of damage to the organism attacked or prevention/recovery from the infection caused by the attack. [GOC:go_curators]	100	0.0559	5.23e-45	7.84e-41
GOBP_RESPONSE_TO_BIOTIC_STIMULUS	1606	Any process that results in a change in state or activity of a cell or an organism (in terms of movement, secretion, enzyme production, gene expression, etc.) as a result of a biotic stimulus, a stimulus caused or produced by a living organism. [GOC:hb]	92	0.0573	4.13e-42	3.1e-38
GOBP_DEFENSE_RESPONSE_TO_OTHER_ORGANISM	1208	Reactions triggered in response to the presence of another organism that act to protect the cell or organism from damage caused by that organism. [GOC:dos]	81	0.0671	7.36e-42	3.68e-38
GOBP_DEFENSE_RESPONSE_TO_VIRUS	260	Reactions triggered in response to the presence of a virus that act to protect the cell or organism. [GOC:ai]	45	0.1731	2.52e-41	9.46e-38
GOBP_RESPONSE_TO_VIRUS	358	Any process that results in a change in state or activity of a cell or an organism (in terms of movement, secretion, enzyme production, gene expression, etc.) as a result of a stimulus from a virus. [GOC:hb]	48	0.1341	1.37e-38	4.11e-35
GOBP_INNATE_IMMUNE_RESPONSE	997	Innate immune responses are defense responses mediated by germline encoded components that directly recognize components of potential pathogens. [GO_REF:0000022, GOC:add, GOC:ebc, GOC:mtg_sensu]	71	0.0712	2.79e-38	6.97e-35
GOBP_IMMUNE_EFFECTOR_PROCESS	1296	Any process of the immune system that can potentially contribute to an immune response. [GO_REF:0000022, GOC:add, ISBN:0781735149]	79	0.061	7.48e-38	1.6e-34
GOBP_RESPONSE_TO_CYTOKINE	1188	Any process that results in a change in state or activity of a cell or an organism (in terms of movement, secretion, enzyme production, gene expression, etc.) as a result of a cytokine stimulus. [GOC:sl]	64	0.0539	1.42e-27	2.66e-24
GOBP_NEGATIVE_REGULATION_OF_VIRAL_PROCESS	89	Any process that stops, prevents, or reduces the frequency, rate or extent of a multi-organism process in which a virus is a participant. [GOC:bf, GOC:jl]	22	0.2472	2.09e-24	3.48e-21
GOBP_REGULATION_OF_IMMUNE_SYSTEM_PROCESS	1593	Any process that modulates the frequency, rate, or extent of an immune system process. [GOC:add]	68	0.0427	1.62e-23	2.43e-20
GOBP_CYTOKINE_MEDIATED_SIGNALING_PATHWAY	803	A series of molecular signals initiated by the binding of a cytokine to a receptor on the surface of a cell, and ending with regulation of a downstream cellular process, e.g. transcription. [GOC:mah, GOC:signaling, PMID:19295629]	47	0.0585	7.57e-22	1.03e-18
GOBP_RESPONSE_TO_TYPE_I_INTERFERON	101	Any process that results in a change in state or activity of a cell or an organism (in terms of movement, secretion, enzyme production, gene expression, etc.) as a result of a type I interferon stimulus. Type I interferons include the interferon-alpha, beta, delta, episilon, zeta, kappa, tau, and omega gene families. [GOC:add, ISBN:0126896631, PMID:15546383, PMID:16681834]	21	0.2079	1.22e-21	1.52e-18
GOBP_NEGATIVE_REGULATION_OF_VIRAL_GENOME_REPLICATION	54	Any process that stops, prevents, or reduces the frequency, rate or extent of viral genome replication. [GOC:go_curators]	17	0.3148	3.62e-21	4.18e-18
GOBP_REGULATION_OF_VIRAL_LIFE_CYCLE	148	Any process that modulates the frequency, rate or extent of viral life cycle. [GO_REF:0000058, GOC:TermGenie, PMID:18005716]	23	0.1554	1.54e-20	1.65e-17
GOBP_REGULATION_OF_VIRAL_GENOME_REPLICATION	83	Any process that modulates the frequency, rate or extent of viral genome replication. [GOC:ai]	18	0.2169	4.34e-19	4.34e-16
GOBP_REGULATION_OF_IMMUNE_RESPONSE	993	Any process that modulates the frequency, rate or extent of the immune response, the immunological reaction of an organism to an immunogenic stimulus. [GOC:ai]	48	0.0483	6.99e-19	6.56e-16
GOBP_REGULATION_OF_BIOLOGICAL_PROCESS_INVOLVED_IN_SYMBIOTIC_INTERACTION	197	Any process that modulates the frequency, rate or extent of symbiosis, an interaction between two organisms living together in more or less intimate association. [GOC:jl]	24	0.1218	7.94e-19	7e-16
GOBP_REGULATION_OF_RESPONSE_TO_BIOTIC_STIMULUS	418	Any process that modulates the frequency, rate, or extent of a response to biotic stimulus. [GOC:add]	32	0.0766	1.53e-18	1.28e-15
GOBP_POSITIVE_REGULATION_OF_IMMUNE_SYSTEM_PROCESS	1050	Any process that activates or increases the frequency, rate, or extent of an immune system process. [GOC:add]	48	0.0457	6.47e-18	5.1e-15
GOBP_CYTOKINE_PRODUCTION	823	The appearance of a cytokine due to biosynthesis or secretion following a cellular stimulus, resulting in an increase in its intracellular or extracellular levels. [GOC:add, ISBN:0781735149]	42	0.051	1.83e-17	1.37e-14
Gene Symbol	GOBP_DEFENSE_RESPONSE	GOBP_RESPONSE_TO_BIOTIC_STIMULUS	GOBP_DEFENSE_RESPONSE_TO_OTHER_ORGANISM	GOBP_DEFENSE_RESPONSE_TO_VIRUS	GOBP_RESPONSE_TO_VIRUS	GOBP_INNATE_IMMUNE_RESPONSE	GOBP_IMMUNE_EFFECTOR_PROCESS	GOBP_RESPONSE_TO_CYTOKINE	GOBP_NEGATIVE_REGULATION_OF_VIRAL_PROCESS	GOBP_REGULATION_OF_IMMUNE_SYSTEM_PROCESS	GOBP_CYTOKINE_MEDIATED_SIGNALING_PATHWAY	GOBP_RESPONSE_TO_TYPE_I_INTERFERON	GOBP_NEGATIVE_REGULATION_OF_VIRAL_GENOME_REPLICATION	GOBP_REGULATION_OF_VIRAL_LIFE_CYCLE	GOBP_REGULATION_OF_VIRAL_GENOME_REPLICATION	GOBP_REGULATION_OF_IMMUNE_RESPONSE	GOBP_REGULATION_OF_BIOLOGICAL_PROCESS_INVOLVED_IN_SYMBIOTIC_INTERACTION	GOBP_REGULATION_OF_RESPONSE_TO_BIOTIC_STIMULUS	GOBP_POSITIVE_REGULATION_OF_IMMUNE_SYSTEM_PROCESS	GOBP_CYTOKINE_PRODUCTION
TRIM6	GOBP_DEFENSE_RESPONSE	GOBP_RESPONSE_TO_BIOTIC_STIMULUS	GOBP_DEFENSE_RESPONSE_TO_OTHER_ORGANISM	GOBP_DEFENSE_RESPONSE_TO_VIRUS	GOBP_RESPONSE_TO_VIRUS	GOBP_INNATE_IMMUNE_RESPONSE	GOBP_IMMUNE_EFFECTOR_PROCESS	GOBP_RESPONSE_TO_CYTOKINE	GOBP_NEGATIVE_REGULATION_OF_VIRAL_PROCESS	GOBP_REGULATION_OF_IMMUNE_SYSTEM_PROCESS	GOBP_CYTOKINE_MEDIATED_SIGNALING_PATHWAY	GOBP_RESPONSE_TO_TYPE_I_INTERFERON	GOBP_NEGATIVE_REGULATION_OF_VIRAL_GENOME_REPLICATION	GOBP_REGULATION_OF_VIRAL_LIFE_CYCLE	GOBP_REGULATION_OF_VIRAL_GENOME_REPLICATION	GOBP_REGULATION_OF_IMMUNE_RESPONSE	GOBP_REGULATION_OF_BIOLOGICAL_PROCESS_INVOLVED_IN_SYMBIOTIC_INTERACTION	GOBP_REGULATION_OF_RESPONSE_TO_BIOTIC_STIMULUS	GOBP_POSITIVE_REGULATION_OF_IMMUNE_SYSTEM_PROCESS	GOBP_CYTOKINE_PRODUCTION
RSAD2	GOBP_DEFENSE_RESPONSE	GOBP_RESPONSE_TO_BIOTIC_STIMULUS	GOBP_DEFENSE_RESPONSE_TO_OTHER_ORGANISM	GOBP_DEFENSE_RESPONSE_TO_VIRUS	GOBP_RESPONSE_TO_VIRUS	GOBP_INNATE_IMMUNE_RESPONSE	GOBP_IMMUNE_EFFECTOR_PROCESS	GOBP_RESPONSE_TO_CYTOKINE	GOBP_NEGATIVE_REGULATION_OF_VIRAL_PROCESS	GOBP_REGULATION_OF_IMMUNE_SYSTEM_PROCESS	GOBP_CYTOKINE_MEDIATED_SIGNALING_PATHWAY	GOBP_RESPONSE_TO_TYPE_I_INTERFERON	GOBP_NEGATIVE_REGULATION_OF_VIRAL_GENOME_REPLICATION	GOBP_REGULATION_OF_VIRAL_LIFE_CYCLE	GOBP_REGULATION_OF_VIRAL_GENOME_REPLICATION	GOBP_REGULATION_OF_IMMUNE_RESPONSE	GOBP_REGULATION_OF_BIOLOGICAL_PROCESS_INVOLVED_IN_SYMBIOTIC_INTERACTION		GOBP_POSITIVE_REGULATION_OF_IMMUNE_SYSTEM_PROCESS	GOBP_CYTOKINE_PRODUCTION
IFITM1	GOBP_DEFENSE_RESPONSE	GOBP_RESPONSE_TO_BIOTIC_STIMULUS	GOBP_DEFENSE_RESPONSE_TO_OTHER_ORGANISM	GOBP_DEFENSE_RESPONSE_TO_VIRUS	GOBP_RESPONSE_TO_VIRUS	GOBP_INNATE_IMMUNE_RESPONSE	GOBP_IMMUNE_EFFECTOR_PROCESS	GOBP_RESPONSE_TO_CYTOKINE	GOBP_NEGATIVE_REGULATION_OF_VIRAL_PROCESS	GOBP_REGULATION_OF_IMMUNE_SYSTEM_PROCESS	GOBP_CYTOKINE_MEDIATED_SIGNALING_PATHWAY	GOBP_RESPONSE_TO_TYPE_I_INTERFERON	GOBP_NEGATIVE_REGULATION_OF_VIRAL_GENOME_REPLICATION	GOBP_REGULATION_OF_VIRAL_LIFE_CYCLE	GOBP_REGULATION_OF_VIRAL_GENOME_REPLICATION	GOBP_REGULATION_OF_IMMUNE_RESPONSE	GOBP_REGULATION_OF_BIOLOGICAL_PROCESS_INVOLVED_IN_SYMBIOTIC_INTERACTION
IFIT1	GOBP_DEFENSE_RESPONSE	GOBP_RESPONSE_TO_BIOTIC_STIMULUS	GOBP_DEFENSE_RESPONSE_TO_OTHER_ORGANISM	GOBP_DEFENSE_RESPONSE_TO_VIRUS	GOBP_RESPONSE_TO_VIRUS	GOBP_INNATE_IMMUNE_RESPONSE	GOBP_IMMUNE_EFFECTOR_PROCESS	GOBP_RESPONSE_TO_CYTOKINE	GOBP_NEGATIVE_REGULATION_OF_VIRAL_PROCESS	GOBP_REGULATION_OF_IMMUNE_SYSTEM_PROCESS	GOBP_CYTOKINE_MEDIATED_SIGNALING_PATHWAY	GOBP_RESPONSE_TO_TYPE_I_INTERFERON	GOBP_NEGATIVE_REGULATION_OF_VIRAL_GENOME_REPLICATION	GOBP_REGULATION_OF_VIRAL_LIFE_CYCLE	GOBP_REGULATION_OF_VIRAL_GENOME_REPLICATION		GOBP_REGULATION_OF_BIOLOGICAL_PROCESS_INVOLVED_IN_SYMBIOTIC_INTERACTION	GOBP_REGULATION_OF_RESPONSE_TO_BIOTIC_STIMULUS
BST2	GOBP_DEFENSE_RESPONSE	GOBP_RESPONSE_TO_BIOTIC_STIMULUS	GOBP_DEFENSE_RESPONSE_TO_OTHER_ORGANISM	GOBP_DEFENSE_RESPONSE_TO_VIRUS	GOBP_RESPONSE_TO_VIRUS	GOBP_INNATE_IMMUNE_RESPONSE	GOBP_IMMUNE_EFFECTOR_PROCESS	GOBP_RESPONSE_TO_CYTOKINE	GOBP_NEGATIVE_REGULATION_OF_VIRAL_PROCESS	GOBP_REGULATION_OF_IMMUNE_SYSTEM_PROCESS	GOBP_CYTOKINE_MEDIATED_SIGNALING_PATHWAY	GOBP_RESPONSE_TO_TYPE_I_INTERFERON	GOBP_NEGATIVE_REGULATION_OF_VIRAL_GENOME_REPLICATION	GOBP_REGULATION_OF_VIRAL_LIFE_CYCLE	GOBP_REGULATION_OF_VIRAL_GENOME_REPLICATION		GOBP_REGULATION_OF_BIOLOGICAL_PROCESS_INVOLVED_IN_SYMBIOTIC_INTERACTION			GOBP_CYTOKINE_PRODUCTION
STAT1	GOBP_DEFENSE_RESPONSE	GOBP_RESPONSE_TO_BIOTIC_STIMULUS	GOBP_DEFENSE_RESPONSE_TO_OTHER_ORGANISM	GOBP_DEFENSE_RESPONSE_TO_VIRUS	GOBP_RESPONSE_TO_VIRUS	GOBP_INNATE_IMMUNE_RESPONSE	GOBP_IMMUNE_EFFECTOR_PROCESS	GOBP_RESPONSE_TO_CYTOKINE	GOBP_NEGATIVE_REGULATION_OF_VIRAL_PROCESS	GOBP_REGULATION_OF_IMMUNE_SYSTEM_PROCESS	GOBP_CYTOKINE_MEDIATED_SIGNALING_PATHWAY	GOBP_RESPONSE_TO_TYPE_I_INTERFERON				GOBP_REGULATION_OF_IMMUNE_RESPONSE	GOBP_REGULATION_OF_BIOLOGICAL_PROCESS_INVOLVED_IN_SYMBIOTIC_INTERACTION	GOBP_REGULATION_OF_RESPONSE_TO_BIOTIC_STIMULUS		GOBP_CYTOKINE_PRODUCTION
TRIM5	GOBP_DEFENSE_RESPONSE	GOBP_RESPONSE_TO_BIOTIC_STIMULUS	GOBP_DEFENSE_RESPONSE_TO_OTHER_ORGANISM	GOBP_DEFENSE_RESPONSE_TO_VIRUS	GOBP_RESPONSE_TO_VIRUS	GOBP_INNATE_IMMUNE_RESPONSE	GOBP_IMMUNE_EFFECTOR_PROCESS	GOBP_RESPONSE_TO_CYTOKINE	GOBP_NEGATIVE_REGULATION_OF_VIRAL_PROCESS	GOBP_REGULATION_OF_IMMUNE_SYSTEM_PROCESS	GOBP_CYTOKINE_MEDIATED_SIGNALING_PATHWAY			GOBP_REGULATION_OF_VIRAL_LIFE_CYCLE		GOBP_REGULATION_OF_IMMUNE_RESPONSE	GOBP_REGULATION_OF_BIOLOGICAL_PROCESS_INVOLVED_IN_SYMBIOTIC_INTERACTION	GOBP_REGULATION_OF_RESPONSE_TO_BIOTIC_STIMULUS	GOBP_POSITIVE_REGULATION_OF_IMMUNE_SYSTEM_PROCESS
IFI16	GOBP_DEFENSE_RESPONSE	GOBP_RESPONSE_TO_BIOTIC_STIMULUS	GOBP_DEFENSE_RESPONSE_TO_OTHER_ORGANISM	GOBP_DEFENSE_RESPONSE_TO_VIRUS	GOBP_RESPONSE_TO_VIRUS	GOBP_INNATE_IMMUNE_RESPONSE	GOBP_IMMUNE_EFFECTOR_PROCESS	GOBP_RESPONSE_TO_CYTOKINE	GOBP_NEGATIVE_REGULATION_OF_VIRAL_PROCESS	GOBP_REGULATION_OF_IMMUNE_SYSTEM_PROCESS			GOBP_NEGATIVE_REGULATION_OF_VIRAL_GENOME_REPLICATION	GOBP_REGULATION_OF_VIRAL_LIFE_CYCLE	GOBP_REGULATION_OF_VIRAL_GENOME_REPLICATION	GOBP_REGULATION_OF_IMMUNE_RESPONSE	GOBP_REGULATION_OF_BIOLOGICAL_PROCESS_INVOLVED_IN_SYMBIOTIC_INTERACTION	GOBP_REGULATION_OF_RESPONSE_TO_BIOTIC_STIMULUS	GOBP_POSITIVE_REGULATION_OF_IMMUNE_SYSTEM_PROCESS	GOBP_CYTOKINE_PRODUCTION
PLSCR1	GOBP_DEFENSE_RESPONSE	GOBP_RESPONSE_TO_BIOTIC_STIMULUS	GOBP_DEFENSE_RESPONSE_TO_OTHER_ORGANISM	GOBP_DEFENSE_RESPONSE_TO_VIRUS	GOBP_RESPONSE_TO_VIRUS	GOBP_INNATE_IMMUNE_RESPONSE	GOBP_IMMUNE_EFFECTOR_PROCESS	GOBP_RESPONSE_TO_CYTOKINE	GOBP_NEGATIVE_REGULATION_OF_VIRAL_PROCESS	GOBP_REGULATION_OF_IMMUNE_SYSTEM_PROCESS			GOBP_NEGATIVE_REGULATION_OF_VIRAL_GENOME_REPLICATION	GOBP_REGULATION_OF_VIRAL_LIFE_CYCLE	GOBP_REGULATION_OF_VIRAL_GENOME_REPLICATION	GOBP_REGULATION_OF_IMMUNE_RESPONSE	GOBP_REGULATION_OF_BIOLOGICAL_PROCESS_INVOLVED_IN_SYMBIOTIC_INTERACTION	GOBP_REGULATION_OF_RESPONSE_TO_BIOTIC_STIMULUS	GOBP_POSITIVE_REGULATION_OF_IMMUNE_SYSTEM_PROCESS
MX1	GOBP_DEFENSE_RESPONSE	GOBP_RESPONSE_TO_BIOTIC_STIMULUS	GOBP_DEFENSE_RESPONSE_TO_OTHER_ORGANISM	GOBP_DEFENSE_RESPONSE_TO_VIRUS	GOBP_RESPONSE_TO_VIRUS	GOBP_INNATE_IMMUNE_RESPONSE	GOBP_IMMUNE_EFFECTOR_PROCESS	GOBP_RESPONSE_TO_CYTOKINE	GOBP_NEGATIVE_REGULATION_OF_VIRAL_PROCESS		GOBP_CYTOKINE_MEDIATED_SIGNALING_PATHWAY	GOBP_RESPONSE_TO_TYPE_I_INTERFERON	GOBP_NEGATIVE_REGULATION_OF_VIRAL_GENOME_REPLICATION	GOBP_REGULATION_OF_VIRAL_LIFE_CYCLE	GOBP_REGULATION_OF_VIRAL_GENOME_REPLICATION		GOBP_REGULATION_OF_BIOLOGICAL_PROCESS_INVOLVED_IN_SYMBIOTIC_INTERACTION
OAS2	GOBP_DEFENSE_RESPONSE	GOBP_RESPONSE_TO_BIOTIC_STIMULUS	GOBP_DEFENSE_RESPONSE_TO_OTHER_ORGANISM	GOBP_DEFENSE_RESPONSE_TO_VIRUS	GOBP_RESPONSE_TO_VIRUS	GOBP_INNATE_IMMUNE_RESPONSE	GOBP_IMMUNE_EFFECTOR_PROCESS	GOBP_RESPONSE_TO_CYTOKINE	GOBP_NEGATIVE_REGULATION_OF_VIRAL_PROCESS		GOBP_CYTOKINE_MEDIATED_SIGNALING_PATHWAY	GOBP_RESPONSE_TO_TYPE_I_INTERFERON	GOBP_NEGATIVE_REGULATION_OF_VIRAL_GENOME_REPLICATION	GOBP_REGULATION_OF_VIRAL_LIFE_CYCLE	GOBP_REGULATION_OF_VIRAL_GENOME_REPLICATION		GOBP_REGULATION_OF_BIOLOGICAL_PROCESS_INVOLVED_IN_SYMBIOTIC_INTERACTION
OAS1	GOBP_DEFENSE_RESPONSE	GOBP_RESPONSE_TO_BIOTIC_STIMULUS	GOBP_DEFENSE_RESPONSE_TO_OTHER_ORGANISM	GOBP_DEFENSE_RESPONSE_TO_VIRUS	GOBP_RESPONSE_TO_VIRUS	GOBP_INNATE_IMMUNE_RESPONSE	GOBP_IMMUNE_EFFECTOR_PROCESS	GOBP_RESPONSE_TO_CYTOKINE	GOBP_NEGATIVE_REGULATION_OF_VIRAL_PROCESS		GOBP_CYTOKINE_MEDIATED_SIGNALING_PATHWAY	GOBP_RESPONSE_TO_TYPE_I_INTERFERON	GOBP_NEGATIVE_REGULATION_OF_VIRAL_GENOME_REPLICATION	GOBP_REGULATION_OF_VIRAL_LIFE_CYCLE	GOBP_REGULATION_OF_VIRAL_GENOME_REPLICATION		GOBP_REGULATION_OF_BIOLOGICAL_PROCESS_INVOLVED_IN_SYMBIOTIC_INTERACTION
OAS3	GOBP_DEFENSE_RESPONSE	GOBP_RESPONSE_TO_BIOTIC_STIMULUS	GOBP_DEFENSE_RESPONSE_TO_OTHER_ORGANISM	GOBP_DEFENSE_RESPONSE_TO_VIRUS	GOBP_RESPONSE_TO_VIRUS	GOBP_INNATE_IMMUNE_RESPONSE	GOBP_IMMUNE_EFFECTOR_PROCESS	GOBP_RESPONSE_TO_CYTOKINE	GOBP_NEGATIVE_REGULATION_OF_VIRAL_PROCESS		GOBP_CYTOKINE_MEDIATED_SIGNALING_PATHWAY	GOBP_RESPONSE_TO_TYPE_I_INTERFERON	GOBP_NEGATIVE_REGULATION_OF_VIRAL_GENOME_REPLICATION	GOBP_REGULATION_OF_VIRAL_LIFE_CYCLE	GOBP_REGULATION_OF_VIRAL_GENOME_REPLICATION		GOBP_REGULATION_OF_BIOLOGICAL_PROCESS_INVOLVED_IN_SYMBIOTIC_INTERACTION
OASL	GOBP_DEFENSE_RESPONSE	GOBP_RESPONSE_TO_BIOTIC_STIMULUS	GOBP_DEFENSE_RESPONSE_TO_OTHER_ORGANISM	GOBP_DEFENSE_RESPONSE_TO_VIRUS	GOBP_RESPONSE_TO_VIRUS	GOBP_INNATE_IMMUNE_RESPONSE	GOBP_IMMUNE_EFFECTOR_PROCESS	GOBP_RESPONSE_TO_CYTOKINE	GOBP_NEGATIVE_REGULATION_OF_VIRAL_PROCESS		GOBP_CYTOKINE_MEDIATED_SIGNALING_PATHWAY	GOBP_RESPONSE_TO_TYPE_I_INTERFERON	GOBP_NEGATIVE_REGULATION_OF_VIRAL_GENOME_REPLICATION	GOBP_REGULATION_OF_VIRAL_LIFE_CYCLE	GOBP_REGULATION_OF_VIRAL_GENOME_REPLICATION		GOBP_REGULATION_OF_BIOLOGICAL_PROCESS_INVOLVED_IN_SYMBIOTIC_INTERACTION
IFITM3	GOBP_DEFENSE_RESPONSE	GOBP_RESPONSE_TO_BIOTIC_STIMULUS	GOBP_DEFENSE_RESPONSE_TO_OTHER_ORGANISM	GOBP_DEFENSE_RESPONSE_TO_VIRUS	GOBP_RESPONSE_TO_VIRUS	GOBP_INNATE_IMMUNE_RESPONSE	GOBP_IMMUNE_EFFECTOR_PROCESS	GOBP_RESPONSE_TO_CYTOKINE	GOBP_NEGATIVE_REGULATION_OF_VIRAL_PROCESS		GOBP_CYTOKINE_MEDIATED_SIGNALING_PATHWAY	GOBP_RESPONSE_TO_TYPE_I_INTERFERON	GOBP_NEGATIVE_REGULATION_OF_VIRAL_GENOME_REPLICATION	GOBP_REGULATION_OF_VIRAL_LIFE_CYCLE	GOBP_REGULATION_OF_VIRAL_GENOME_REPLICATION		GOBP_REGULATION_OF_BIOLOGICAL_PROCESS_INVOLVED_IN_SYMBIOTIC_INTERACTION
PML	GOBP_DEFENSE_RESPONSE	GOBP_RESPONSE_TO_BIOTIC_STIMULUS	GOBP_DEFENSE_RESPONSE_TO_OTHER_ORGANISM	GOBP_DEFENSE_RESPONSE_TO_VIRUS	GOBP_RESPONSE_TO_VIRUS	GOBP_INNATE_IMMUNE_RESPONSE	GOBP_IMMUNE_EFFECTOR_PROCESS	GOBP_RESPONSE_TO_CYTOKINE	GOBP_NEGATIVE_REGULATION_OF_VIRAL_PROCESS		GOBP_CYTOKINE_MEDIATED_SIGNALING_PATHWAY			GOBP_REGULATION_OF_VIRAL_LIFE_CYCLE			GOBP_REGULATION_OF_BIOLOGICAL_PROCESS_INVOLVED_IN_SYMBIOTIC_INTERACTION			GOBP_CYTOKINE_PRODUCTION
EIF2AK2	GOBP_DEFENSE_RESPONSE	GOBP_RESPONSE_TO_BIOTIC_STIMULUS	GOBP_DEFENSE_RESPONSE_TO_OTHER_ORGANISM	GOBP_DEFENSE_RESPONSE_TO_VIRUS	GOBP_RESPONSE_TO_VIRUS	GOBP_INNATE_IMMUNE_RESPONSE	GOBP_IMMUNE_EFFECTOR_PROCESS	GOBP_RESPONSE_TO_CYTOKINE	GOBP_NEGATIVE_REGULATION_OF_VIRAL_PROCESS				GOBP_NEGATIVE_REGULATION_OF_VIRAL_GENOME_REPLICATION	GOBP_REGULATION_OF_VIRAL_LIFE_CYCLE	GOBP_REGULATION_OF_VIRAL_GENOME_REPLICATION		GOBP_REGULATION_OF_BIOLOGICAL_PROCESS_INVOLVED_IN_SYMBIOTIC_INTERACTION			GOBP_CYTOKINE_PRODUCTION
ZBP1	GOBP_DEFENSE_RESPONSE	GOBP_RESPONSE_TO_BIOTIC_STIMULUS	GOBP_DEFENSE_RESPONSE_TO_OTHER_ORGANISM	GOBP_DEFENSE_RESPONSE_TO_VIRUS	GOBP_RESPONSE_TO_VIRUS	GOBP_INNATE_IMMUNE_RESPONSE	GOBP_IMMUNE_EFFECTOR_PROCESS	GOBP_RESPONSE_TO_CYTOKINE		GOBP_REGULATION_OF_IMMUNE_SYSTEM_PROCESS	GOBP_CYTOKINE_MEDIATED_SIGNALING_PATHWAY	GOBP_RESPONSE_TO_TYPE_I_INTERFERON				GOBP_REGULATION_OF_IMMUNE_RESPONSE		GOBP_REGULATION_OF_RESPONSE_TO_BIOTIC_STIMULUS	GOBP_POSITIVE_REGULATION_OF_IMMUNE_SYSTEM_PROCESS	GOBP_CYTOKINE_PRODUCTION
AIM2	GOBP_DEFENSE_RESPONSE	GOBP_RESPONSE_TO_BIOTIC_STIMULUS	GOBP_DEFENSE_RESPONSE_TO_OTHER_ORGANISM	GOBP_DEFENSE_RESPONSE_TO_VIRUS	GOBP_RESPONSE_TO_VIRUS	GOBP_INNATE_IMMUNE_RESPONSE	GOBP_IMMUNE_EFFECTOR_PROCESS	GOBP_RESPONSE_TO_CYTOKINE		GOBP_REGULATION_OF_IMMUNE_SYSTEM_PROCESS	GOBP_CYTOKINE_MEDIATED_SIGNALING_PATHWAY					GOBP_REGULATION_OF_IMMUNE_RESPONSE		GOBP_REGULATION_OF_RESPONSE_TO_BIOTIC_STIMULUS	GOBP_POSITIVE_REGULATION_OF_IMMUNE_SYSTEM_PROCESS	GOBP_CYTOKINE_PRODUCTION
PARP9	GOBP_DEFENSE_RESPONSE	GOBP_RESPONSE_TO_BIOTIC_STIMULUS	GOBP_DEFENSE_RESPONSE_TO_OTHER_ORGANISM	GOBP_DEFENSE_RESPONSE_TO_VIRUS	GOBP_RESPONSE_TO_VIRUS	GOBP_INNATE_IMMUNE_RESPONSE	GOBP_IMMUNE_EFFECTOR_PROCESS	GOBP_RESPONSE_TO_CYTOKINE		GOBP_REGULATION_OF_IMMUNE_SYSTEM_PROCESS	GOBP_CYTOKINE_MEDIATED_SIGNALING_PATHWAY					GOBP_REGULATION_OF_IMMUNE_RESPONSE		GOBP_REGULATION_OF_RESPONSE_TO_BIOTIC_STIMULUS	GOBP_POSITIVE_REGULATION_OF_IMMUNE_SYSTEM_PROCESS
GBP1	GOBP_DEFENSE_RESPONSE	GOBP_RESPONSE_TO_BIOTIC_STIMULUS	GOBP_DEFENSE_RESPONSE_TO_OTHER_ORGANISM	GOBP_DEFENSE_RESPONSE_TO_VIRUS	GOBP_RESPONSE_TO_VIRUS	GOBP_INNATE_IMMUNE_RESPONSE	GOBP_IMMUNE_EFFECTOR_PROCESS	GOBP_RESPONSE_TO_CYTOKINE		GOBP_REGULATION_OF_IMMUNE_SYSTEM_PROCESS	GOBP_CYTOKINE_MEDIATED_SIGNALING_PATHWAY					GOBP_REGULATION_OF_IMMUNE_RESPONSE			GOBP_POSITIVE_REGULATION_OF_IMMUNE_SYSTEM_PROCESS	GOBP_CYTOKINE_PRODUCTION
DDX58	GOBP_DEFENSE_RESPONSE	GOBP_RESPONSE_TO_BIOTIC_STIMULUS	GOBP_DEFENSE_RESPONSE_TO_OTHER_ORGANISM	GOBP_DEFENSE_RESPONSE_TO_VIRUS	GOBP_RESPONSE_TO_VIRUS	GOBP_INNATE_IMMUNE_RESPONSE	GOBP_IMMUNE_EFFECTOR_PROCESS	GOBP_RESPONSE_TO_CYTOKINE		GOBP_REGULATION_OF_IMMUNE_SYSTEM_PROCESS								GOBP_REGULATION_OF_RESPONSE_TO_BIOTIC_STIMULUS	GOBP_POSITIVE_REGULATION_OF_IMMUNE_SYSTEM_PROCESS	GOBP_CYTOKINE_PRODUCTION
IFI27	GOBP_DEFENSE_RESPONSE	GOBP_RESPONSE_TO_BIOTIC_STIMULUS	GOBP_DEFENSE_RESPONSE_TO_OTHER_ORGANISM	GOBP_DEFENSE_RESPONSE_TO_VIRUS	GOBP_RESPONSE_TO_VIRUS	GOBP_INNATE_IMMUNE_RESPONSE	GOBP_IMMUNE_EFFECTOR_PROCESS	GOBP_RESPONSE_TO_CYTOKINE			GOBP_CYTOKINE_MEDIATED_SIGNALING_PATHWAY	GOBP_RESPONSE_TO_TYPE_I_INTERFERON
STAT2	GOBP_DEFENSE_RESPONSE	GOBP_RESPONSE_TO_BIOTIC_STIMULUS	GOBP_DEFENSE_RESPONSE_TO_OTHER_ORGANISM	GOBP_DEFENSE_RESPONSE_TO_VIRUS	GOBP_RESPONSE_TO_VIRUS	GOBP_INNATE_IMMUNE_RESPONSE	GOBP_IMMUNE_EFFECTOR_PROCESS	GOBP_RESPONSE_TO_CYTOKINE			GOBP_CYTOKINE_MEDIATED_SIGNALING_PATHWAY	GOBP_RESPONSE_TO_TYPE_I_INTERFERON
IFIT3	GOBP_DEFENSE_RESPONSE	GOBP_RESPONSE_TO_BIOTIC_STIMULUS	GOBP_DEFENSE_RESPONSE_TO_OTHER_ORGANISM	GOBP_DEFENSE_RESPONSE_TO_VIRUS	GOBP_RESPONSE_TO_VIRUS	GOBP_INNATE_IMMUNE_RESPONSE	GOBP_IMMUNE_EFFECTOR_PROCESS	GOBP_RESPONSE_TO_CYTOKINE			GOBP_CYTOKINE_MEDIATED_SIGNALING_PATHWAY	GOBP_RESPONSE_TO_TYPE_I_INTERFERON
IFI6	GOBP_DEFENSE_RESPONSE	GOBP_RESPONSE_TO_BIOTIC_STIMULUS	GOBP_DEFENSE_RESPONSE_TO_OTHER_ORGANISM	GOBP_DEFENSE_RESPONSE_TO_VIRUS	GOBP_RESPONSE_TO_VIRUS	GOBP_INNATE_IMMUNE_RESPONSE	GOBP_IMMUNE_EFFECTOR_PROCESS	GOBP_RESPONSE_TO_CYTOKINE			GOBP_CYTOKINE_MEDIATED_SIGNALING_PATHWAY	GOBP_RESPONSE_TO_TYPE_I_INTERFERON
IFIT2	GOBP_DEFENSE_RESPONSE	GOBP_RESPONSE_TO_BIOTIC_STIMULUS	GOBP_DEFENSE_RESPONSE_TO_OTHER_ORGANISM	GOBP_DEFENSE_RESPONSE_TO_VIRUS	GOBP_RESPONSE_TO_VIRUS	GOBP_INNATE_IMMUNE_RESPONSE	GOBP_IMMUNE_EFFECTOR_PROCESS	GOBP_RESPONSE_TO_CYTOKINE			GOBP_CYTOKINE_MEDIATED_SIGNALING_PATHWAY	GOBP_RESPONSE_TO_TYPE_I_INTERFERON
TRIM22	GOBP_DEFENSE_RESPONSE	GOBP_RESPONSE_TO_BIOTIC_STIMULUS	GOBP_DEFENSE_RESPONSE_TO_OTHER_ORGANISM	GOBP_DEFENSE_RESPONSE_TO_VIRUS	GOBP_RESPONSE_TO_VIRUS	GOBP_INNATE_IMMUNE_RESPONSE	GOBP_IMMUNE_EFFECTOR_PROCESS	GOBP_RESPONSE_TO_CYTOKINE			GOBP_CYTOKINE_MEDIATED_SIGNALING_PATHWAY			GOBP_REGULATION_OF_VIRAL_LIFE_CYCLE			GOBP_REGULATION_OF_BIOLOGICAL_PROCESS_INVOLVED_IN_SYMBIOTIC_INTERACTION
IFIH1	GOBP_DEFENSE_RESPONSE	GOBP_RESPONSE_TO_BIOTIC_STIMULUS	GOBP_DEFENSE_RESPONSE_TO_OTHER_ORGANISM	GOBP_DEFENSE_RESPONSE_TO_VIRUS	GOBP_RESPONSE_TO_VIRUS	GOBP_INNATE_IMMUNE_RESPONSE	GOBP_IMMUNE_EFFECTOR_PROCESS	GOBP_RESPONSE_TO_CYTOKINE												GOBP_CYTOKINE_PRODUCTION
GBP3	GOBP_DEFENSE_RESPONSE	GOBP_RESPONSE_TO_BIOTIC_STIMULUS	GOBP_DEFENSE_RESPONSE_TO_OTHER_ORGANISM	GOBP_DEFENSE_RESPONSE_TO_VIRUS	GOBP_RESPONSE_TO_VIRUS	GOBP_INNATE_IMMUNE_RESPONSE	GOBP_IMMUNE_EFFECTOR_PROCESS	GOBP_RESPONSE_TO_CYTOKINE
IFIT5	GOBP_DEFENSE_RESPONSE	GOBP_RESPONSE_TO_BIOTIC_STIMULUS	GOBP_DEFENSE_RESPONSE_TO_OTHER_ORGANISM	GOBP_DEFENSE_RESPONSE_TO_VIRUS	GOBP_RESPONSE_TO_VIRUS	GOBP_INNATE_IMMUNE_RESPONSE	GOBP_IMMUNE_EFFECTOR_PROCESS		GOBP_NEGATIVE_REGULATION_OF_VIRAL_PROCESS				GOBP_NEGATIVE_REGULATION_OF_VIRAL_GENOME_REPLICATION	GOBP_REGULATION_OF_VIRAL_LIFE_CYCLE	GOBP_REGULATION_OF_VIRAL_GENOME_REPLICATION		GOBP_REGULATION_OF_BIOLOGICAL_PROCESS_INVOLVED_IN_SYMBIOTIC_INTERACTION
APOBEC3A	GOBP_DEFENSE_RESPONSE	GOBP_RESPONSE_TO_BIOTIC_STIMULUS	GOBP_DEFENSE_RESPONSE_TO_OTHER_ORGANISM	GOBP_DEFENSE_RESPONSE_TO_VIRUS	GOBP_RESPONSE_TO_VIRUS	GOBP_INNATE_IMMUNE_RESPONSE	GOBP_IMMUNE_EFFECTOR_PROCESS		GOBP_NEGATIVE_REGULATION_OF_VIRAL_PROCESS				GOBP_NEGATIVE_REGULATION_OF_VIRAL_GENOME_REPLICATION	GOBP_REGULATION_OF_VIRAL_LIFE_CYCLE	GOBP_REGULATION_OF_VIRAL_GENOME_REPLICATION		GOBP_REGULATION_OF_BIOLOGICAL_PROCESS_INVOLVED_IN_SYMBIOTIC_INTERACTION
DHX58	GOBP_DEFENSE_RESPONSE	GOBP_RESPONSE_TO_BIOTIC_STIMULUS	GOBP_DEFENSE_RESPONSE_TO_OTHER_ORGANISM	GOBP_DEFENSE_RESPONSE_TO_VIRUS	GOBP_RESPONSE_TO_VIRUS	GOBP_INNATE_IMMUNE_RESPONSE	GOBP_IMMUNE_EFFECTOR_PROCESS			GOBP_REGULATION_OF_IMMUNE_SYSTEM_PROCESS						GOBP_REGULATION_OF_IMMUNE_RESPONSE		GOBP_REGULATION_OF_RESPONSE_TO_BIOTIC_STIMULUS	GOBP_POSITIVE_REGULATION_OF_IMMUNE_SYSTEM_PROCESS	GOBP_CYTOKINE_PRODUCTION
RNF135	GOBP_DEFENSE_RESPONSE	GOBP_RESPONSE_TO_BIOTIC_STIMULUS	GOBP_DEFENSE_RESPONSE_TO_OTHER_ORGANISM	GOBP_DEFENSE_RESPONSE_TO_VIRUS	GOBP_RESPONSE_TO_VIRUS	GOBP_INNATE_IMMUNE_RESPONSE	GOBP_IMMUNE_EFFECTOR_PROCESS			GOBP_REGULATION_OF_IMMUNE_SYSTEM_PROCESS						GOBP_REGULATION_OF_IMMUNE_RESPONSE		GOBP_REGULATION_OF_RESPONSE_TO_BIOTIC_STIMULUS		GOBP_CYTOKINE_PRODUCTION
DDX60	GOBP_DEFENSE_RESPONSE	GOBP_RESPONSE_TO_BIOTIC_STIMULUS	GOBP_DEFENSE_RESPONSE_TO_OTHER_ORGANISM	GOBP_DEFENSE_RESPONSE_TO_VIRUS	GOBP_RESPONSE_TO_VIRUS	GOBP_INNATE_IMMUNE_RESPONSE	GOBP_IMMUNE_EFFECTOR_PROCESS			GOBP_REGULATION_OF_IMMUNE_SYSTEM_PROCESS								GOBP_REGULATION_OF_RESPONSE_TO_BIOTIC_STIMULUS	GOBP_POSITIVE_REGULATION_OF_IMMUNE_SYSTEM_PROCESS
HERC5	GOBP_DEFENSE_RESPONSE	GOBP_RESPONSE_TO_BIOTIC_STIMULUS	GOBP_DEFENSE_RESPONSE_TO_OTHER_ORGANISM	GOBP_DEFENSE_RESPONSE_TO_VIRUS	GOBP_RESPONSE_TO_VIRUS	GOBP_INNATE_IMMUNE_RESPONSE	GOBP_IMMUNE_EFFECTOR_PROCESS			GOBP_REGULATION_OF_IMMUNE_SYSTEM_PROCESS								GOBP_REGULATION_OF_RESPONSE_TO_BIOTIC_STIMULUS		GOBP_CYTOKINE_PRODUCTION
DTX3L	GOBP_DEFENSE_RESPONSE	GOBP_RESPONSE_TO_BIOTIC_STIMULUS	GOBP_DEFENSE_RESPONSE_TO_OTHER_ORGANISM	GOBP_DEFENSE_RESPONSE_TO_VIRUS	GOBP_RESPONSE_TO_VIRUS	GOBP_INNATE_IMMUNE_RESPONSE	GOBP_IMMUNE_EFFECTOR_PROCESS			GOBP_REGULATION_OF_IMMUNE_SYSTEM_PROCESS								GOBP_REGULATION_OF_RESPONSE_TO_BIOTIC_STIMULUS
RNASE2	GOBP_DEFENSE_RESPONSE	GOBP_RESPONSE_TO_BIOTIC_STIMULUS	GOBP_DEFENSE_RESPONSE_TO_OTHER_ORGANISM	GOBP_DEFENSE_RESPONSE_TO_VIRUS	GOBP_RESPONSE_TO_VIRUS	GOBP_INNATE_IMMUNE_RESPONSE	GOBP_IMMUNE_EFFECTOR_PROCESS
IL15	GOBP_DEFENSE_RESPONSE	GOBP_RESPONSE_TO_BIOTIC_STIMULUS	GOBP_DEFENSE_RESPONSE_TO_OTHER_ORGANISM	GOBP_DEFENSE_RESPONSE_TO_VIRUS	GOBP_RESPONSE_TO_VIRUS		GOBP_IMMUNE_EFFECTOR_PROCESS	GOBP_RESPONSE_TO_CYTOKINE		GOBP_REGULATION_OF_IMMUNE_SYSTEM_PROCESS	GOBP_CYTOKINE_MEDIATED_SIGNALING_PATHWAY					GOBP_REGULATION_OF_IMMUNE_RESPONSE		GOBP_REGULATION_OF_RESPONSE_TO_BIOTIC_STIMULUS	GOBP_POSITIVE_REGULATION_OF_IMMUNE_SYSTEM_PROCESS	GOBP_CYTOKINE_PRODUCTION
CXCL10	GOBP_DEFENSE_RESPONSE	GOBP_RESPONSE_TO_BIOTIC_STIMULUS	GOBP_DEFENSE_RESPONSE_TO_OTHER_ORGANISM	GOBP_DEFENSE_RESPONSE_TO_VIRUS	GOBP_RESPONSE_TO_VIRUS		GOBP_IMMUNE_EFFECTOR_PROCESS	GOBP_RESPONSE_TO_CYTOKINE		GOBP_REGULATION_OF_IMMUNE_SYSTEM_PROCESS	GOBP_CYTOKINE_MEDIATED_SIGNALING_PATHWAY								GOBP_POSITIVE_REGULATION_OF_IMMUNE_SYSTEM_PROCESS
MOV10	GOBP_DEFENSE_RESPONSE	GOBP_RESPONSE_TO_BIOTIC_STIMULUS	GOBP_DEFENSE_RESPONSE_TO_OTHER_ORGANISM	GOBP_DEFENSE_RESPONSE_TO_VIRUS	GOBP_RESPONSE_TO_VIRUS		GOBP_IMMUNE_EFFECTOR_PROCESS			GOBP_REGULATION_OF_IMMUNE_SYSTEM_PROCESS
AZU1	GOBP_DEFENSE_RESPONSE	GOBP_RESPONSE_TO_BIOTIC_STIMULUS	GOBP_DEFENSE_RESPONSE_TO_OTHER_ORGANISM	GOBP_DEFENSE_RESPONSE_TO_VIRUS	GOBP_RESPONSE_TO_VIRUS		GOBP_IMMUNE_EFFECTOR_PROCESS													GOBP_CYTOKINE_PRODUCTION
IFI44L	GOBP_DEFENSE_RESPONSE	GOBP_RESPONSE_TO_BIOTIC_STIMULUS	GOBP_DEFENSE_RESPONSE_TO_OTHER_ORGANISM	GOBP_DEFENSE_RESPONSE_TO_VIRUS	GOBP_RESPONSE_TO_VIRUS		GOBP_IMMUNE_EFFECTOR_PROCESS
RTP4	GOBP_DEFENSE_RESPONSE	GOBP_RESPONSE_TO_BIOTIC_STIMULUS	GOBP_DEFENSE_RESPONSE_TO_OTHER_ORGANISM	GOBP_DEFENSE_RESPONSE_TO_VIRUS	GOBP_RESPONSE_TO_VIRUS		GOBP_IMMUNE_EFFECTOR_PROCESS
NT5C3A	GOBP_DEFENSE_RESPONSE	GOBP_RESPONSE_TO_BIOTIC_STIMULUS	GOBP_DEFENSE_RESPONSE_TO_OTHER_ORGANISM	GOBP_DEFENSE_RESPONSE_TO_VIRUS	GOBP_RESPONSE_TO_VIRUS		GOBP_IMMUNE_EFFECTOR_PROCESS
NMI	GOBP_DEFENSE_RESPONSE	GOBP_RESPONSE_TO_BIOTIC_STIMULUS	GOBP_DEFENSE_RESPONSE_TO_OTHER_ORGANISM		GOBP_RESPONSE_TO_VIRUS	GOBP_INNATE_IMMUNE_RESPONSE	GOBP_IMMUNE_EFFECTOR_PROCESS	GOBP_RESPONSE_TO_CYTOKINE		GOBP_REGULATION_OF_IMMUNE_SYSTEM_PROCESS	GOBP_CYTOKINE_MEDIATED_SIGNALING_PATHWAY					GOBP_REGULATION_OF_IMMUNE_RESPONSE		GOBP_REGULATION_OF_RESPONSE_TO_BIOTIC_STIMULUS	GOBP_POSITIVE_REGULATION_OF_IMMUNE_SYSTEM_PROCESS	GOBP_CYTOKINE_PRODUCTION
IRAK3	GOBP_DEFENSE_RESPONSE	GOBP_RESPONSE_TO_BIOTIC_STIMULUS	GOBP_DEFENSE_RESPONSE_TO_OTHER_ORGANISM		GOBP_RESPONSE_TO_VIRUS	GOBP_INNATE_IMMUNE_RESPONSE	GOBP_IMMUNE_EFFECTOR_PROCESS	GOBP_RESPONSE_TO_CYTOKINE		GOBP_REGULATION_OF_IMMUNE_SYSTEM_PROCESS	GOBP_CYTOKINE_MEDIATED_SIGNALING_PATHWAY					GOBP_REGULATION_OF_IMMUNE_RESPONSE		GOBP_REGULATION_OF_RESPONSE_TO_BIOTIC_STIMULUS	GOBP_POSITIVE_REGULATION_OF_IMMUNE_SYSTEM_PROCESS	GOBP_CYTOKINE_PRODUCTION
IFI35	GOBP_DEFENSE_RESPONSE	GOBP_RESPONSE_TO_BIOTIC_STIMULUS	GOBP_DEFENSE_RESPONSE_TO_OTHER_ORGANISM			GOBP_INNATE_IMMUNE_RESPONSE	GOBP_IMMUNE_EFFECTOR_PROCESS	GOBP_RESPONSE_TO_CYTOKINE		GOBP_REGULATION_OF_IMMUNE_SYSTEM_PROCESS	GOBP_CYTOKINE_MEDIATED_SIGNALING_PATHWAY	GOBP_RESPONSE_TO_TYPE_I_INTERFERON				GOBP_REGULATION_OF_IMMUNE_RESPONSE		GOBP_REGULATION_OF_RESPONSE_TO_BIOTIC_STIMULUS	GOBP_POSITIVE_REGULATION_OF_IMMUNE_SYSTEM_PROCESS
CEACAM1	GOBP_DEFENSE_RESPONSE	GOBP_RESPONSE_TO_BIOTIC_STIMULUS	GOBP_DEFENSE_RESPONSE_TO_OTHER_ORGANISM			GOBP_INNATE_IMMUNE_RESPONSE	GOBP_IMMUNE_EFFECTOR_PROCESS	GOBP_RESPONSE_TO_CYTOKINE		GOBP_REGULATION_OF_IMMUNE_SYSTEM_PROCESS	GOBP_CYTOKINE_MEDIATED_SIGNALING_PATHWAY					GOBP_REGULATION_OF_IMMUNE_RESPONSE		GOBP_REGULATION_OF_RESPONSE_TO_BIOTIC_STIMULUS	GOBP_POSITIVE_REGULATION_OF_IMMUNE_SYSTEM_PROCESS	GOBP_CYTOKINE_PRODUCTION
IL18RAP	GOBP_DEFENSE_RESPONSE	GOBP_RESPONSE_TO_BIOTIC_STIMULUS	GOBP_DEFENSE_RESPONSE_TO_OTHER_ORGANISM			GOBP_INNATE_IMMUNE_RESPONSE	GOBP_IMMUNE_EFFECTOR_PROCESS	GOBP_RESPONSE_TO_CYTOKINE		GOBP_REGULATION_OF_IMMUNE_SYSTEM_PROCESS	GOBP_CYTOKINE_MEDIATED_SIGNALING_PATHWAY					GOBP_REGULATION_OF_IMMUNE_RESPONSE		GOBP_REGULATION_OF_RESPONSE_TO_BIOTIC_STIMULUS	GOBP_POSITIVE_REGULATION_OF_IMMUNE_SYSTEM_PROCESS
SLPI	GOBP_DEFENSE_RESPONSE	GOBP_RESPONSE_TO_BIOTIC_STIMULUS	GOBP_DEFENSE_RESPONSE_TO_OTHER_ORGANISM			GOBP_INNATE_IMMUNE_RESPONSE	GOBP_IMMUNE_EFFECTOR_PROCESS		GOBP_NEGATIVE_REGULATION_OF_VIRAL_PROCESS				GOBP_NEGATIVE_REGULATION_OF_VIRAL_GENOME_REPLICATION	GOBP_REGULATION_OF_VIRAL_LIFE_CYCLE	GOBP_REGULATION_OF_VIRAL_GENOME_REPLICATION		GOBP_REGULATION_OF_BIOLOGICAL_PROCESS_INVOLVED_IN_SYMBIOTIC_INTERACTION
VSIG4	GOBP_DEFENSE_RESPONSE	GOBP_RESPONSE_TO_BIOTIC_STIMULUS	GOBP_DEFENSE_RESPONSE_TO_OTHER_ORGANISM			GOBP_INNATE_IMMUNE_RESPONSE	GOBP_IMMUNE_EFFECTOR_PROCESS			GOBP_REGULATION_OF_IMMUNE_SYSTEM_PROCESS						GOBP_REGULATION_OF_IMMUNE_RESPONSE		GOBP_REGULATION_OF_RESPONSE_TO_BIOTIC_STIMULUS	GOBP_POSITIVE_REGULATION_OF_IMMUNE_SYSTEM_PROCESS	GOBP_CYTOKINE_PRODUCTION
SERPING1	GOBP_DEFENSE_RESPONSE	GOBP_RESPONSE_TO_BIOTIC_STIMULUS	GOBP_DEFENSE_RESPONSE_TO_OTHER_ORGANISM			GOBP_INNATE_IMMUNE_RESPONSE	GOBP_IMMUNE_EFFECTOR_PROCESS			GOBP_REGULATION_OF_IMMUNE_SYSTEM_PROCESS						GOBP_REGULATION_OF_IMMUNE_RESPONSE		GOBP_REGULATION_OF_RESPONSE_TO_BIOTIC_STIMULUS	GOBP_POSITIVE_REGULATION_OF_IMMUNE_SYSTEM_PROCESS
CLEC4D	GOBP_DEFENSE_RESPONSE	GOBP_RESPONSE_TO_BIOTIC_STIMULUS	GOBP_DEFENSE_RESPONSE_TO_OTHER_ORGANISM			GOBP_INNATE_IMMUNE_RESPONSE	GOBP_IMMUNE_EFFECTOR_PROCESS			GOBP_REGULATION_OF_IMMUNE_SYSTEM_PROCESS						GOBP_REGULATION_OF_IMMUNE_RESPONSE		GOBP_REGULATION_OF_RESPONSE_TO_BIOTIC_STIMULUS	GOBP_POSITIVE_REGULATION_OF_IMMUNE_SYSTEM_PROCESS
C3	GOBP_DEFENSE_RESPONSE	GOBP_RESPONSE_TO_BIOTIC_STIMULUS	GOBP_DEFENSE_RESPONSE_TO_OTHER_ORGANISM			GOBP_INNATE_IMMUNE_RESPONSE	GOBP_IMMUNE_EFFECTOR_PROCESS			GOBP_REGULATION_OF_IMMUNE_SYSTEM_PROCESS						GOBP_REGULATION_OF_IMMUNE_RESPONSE			GOBP_POSITIVE_REGULATION_OF_IMMUNE_SYSTEM_PROCESS	GOBP_CYTOKINE_PRODUCTION
C1QC	GOBP_DEFENSE_RESPONSE	GOBP_RESPONSE_TO_BIOTIC_STIMULUS	GOBP_DEFENSE_RESPONSE_TO_OTHER_ORGANISM			GOBP_INNATE_IMMUNE_RESPONSE	GOBP_IMMUNE_EFFECTOR_PROCESS			GOBP_REGULATION_OF_IMMUNE_SYSTEM_PROCESS						GOBP_REGULATION_OF_IMMUNE_RESPONSE			GOBP_POSITIVE_REGULATION_OF_IMMUNE_SYSTEM_PROCESS
C2	GOBP_DEFENSE_RESPONSE	GOBP_RESPONSE_TO_BIOTIC_STIMULUS	GOBP_DEFENSE_RESPONSE_TO_OTHER_ORGANISM			GOBP_INNATE_IMMUNE_RESPONSE	GOBP_IMMUNE_EFFECTOR_PROCESS			GOBP_REGULATION_OF_IMMUNE_SYSTEM_PROCESS						GOBP_REGULATION_OF_IMMUNE_RESPONSE			GOBP_POSITIVE_REGULATION_OF_IMMUNE_SYSTEM_PROCESS
CFB	GOBP_DEFENSE_RESPONSE	GOBP_RESPONSE_TO_BIOTIC_STIMULUS	GOBP_DEFENSE_RESPONSE_TO_OTHER_ORGANISM			GOBP_INNATE_IMMUNE_RESPONSE	GOBP_IMMUNE_EFFECTOR_PROCESS			GOBP_REGULATION_OF_IMMUNE_SYSTEM_PROCESS						GOBP_REGULATION_OF_IMMUNE_RESPONSE			GOBP_POSITIVE_REGULATION_OF_IMMUNE_SYSTEM_PROCESS
C1QB	GOBP_DEFENSE_RESPONSE	GOBP_RESPONSE_TO_BIOTIC_STIMULUS	GOBP_DEFENSE_RESPONSE_TO_OTHER_ORGANISM			GOBP_INNATE_IMMUNE_RESPONSE	GOBP_IMMUNE_EFFECTOR_PROCESS			GOBP_REGULATION_OF_IMMUNE_SYSTEM_PROCESS						GOBP_REGULATION_OF_IMMUNE_RESPONSE			GOBP_POSITIVE_REGULATION_OF_IMMUNE_SYSTEM_PROCESS
VNN1	GOBP_DEFENSE_RESPONSE	GOBP_RESPONSE_TO_BIOTIC_STIMULUS	GOBP_DEFENSE_RESPONSE_TO_OTHER_ORGANISM			GOBP_INNATE_IMMUNE_RESPONSE	GOBP_IMMUNE_EFFECTOR_PROCESS			GOBP_REGULATION_OF_IMMUNE_SYSTEM_PROCESS									GOBP_POSITIVE_REGULATION_OF_IMMUNE_SYSTEM_PROCESS
RNASE3	GOBP_DEFENSE_RESPONSE	GOBP_RESPONSE_TO_BIOTIC_STIMULUS	GOBP_DEFENSE_RESPONSE_TO_OTHER_ORGANISM			GOBP_INNATE_IMMUNE_RESPONSE	GOBP_IMMUNE_EFFECTOR_PROCESS
TRIM21	GOBP_DEFENSE_RESPONSE	GOBP_RESPONSE_TO_BIOTIC_STIMULUS	GOBP_DEFENSE_RESPONSE_TO_OTHER_ORGANISM			GOBP_INNATE_IMMUNE_RESPONSE		GOBP_RESPONSE_TO_CYTOKINE	GOBP_NEGATIVE_REGULATION_OF_VIRAL_PROCESS	GOBP_REGULATION_OF_IMMUNE_SYSTEM_PROCESS	GOBP_CYTOKINE_MEDIATED_SIGNALING_PATHWAY			GOBP_REGULATION_OF_VIRAL_LIFE_CYCLE		GOBP_REGULATION_OF_IMMUNE_RESPONSE	GOBP_REGULATION_OF_BIOLOGICAL_PROCESS_INVOLVED_IN_SYMBIOTIC_INTERACTION	GOBP_REGULATION_OF_RESPONSE_TO_BIOTIC_STIMULUS		GOBP_CYTOKINE_PRODUCTION
USP18	GOBP_DEFENSE_RESPONSE	GOBP_RESPONSE_TO_BIOTIC_STIMULUS	GOBP_DEFENSE_RESPONSE_TO_OTHER_ORGANISM			GOBP_INNATE_IMMUNE_RESPONSE		GOBP_RESPONSE_TO_CYTOKINE		GOBP_REGULATION_OF_IMMUNE_SYSTEM_PROCESS	GOBP_CYTOKINE_MEDIATED_SIGNALING_PATHWAY	GOBP_RESPONSE_TO_TYPE_I_INTERFERON				GOBP_REGULATION_OF_IMMUNE_RESPONSE		GOBP_REGULATION_OF_RESPONSE_TO_BIOTIC_STIMULUS
PSMB9	GOBP_DEFENSE_RESPONSE	GOBP_RESPONSE_TO_BIOTIC_STIMULUS	GOBP_DEFENSE_RESPONSE_TO_OTHER_ORGANISM			GOBP_INNATE_IMMUNE_RESPONSE		GOBP_RESPONSE_TO_CYTOKINE		GOBP_REGULATION_OF_IMMUNE_SYSTEM_PROCESS	GOBP_CYTOKINE_MEDIATED_SIGNALING_PATHWAY					GOBP_REGULATION_OF_IMMUNE_RESPONSE		GOBP_REGULATION_OF_RESPONSE_TO_BIOTIC_STIMULUS	GOBP_POSITIVE_REGULATION_OF_IMMUNE_SYSTEM_PROCESS
PARP14	GOBP_DEFENSE_RESPONSE	GOBP_RESPONSE_TO_BIOTIC_STIMULUS	GOBP_DEFENSE_RESPONSE_TO_OTHER_ORGANISM			GOBP_INNATE_IMMUNE_RESPONSE		GOBP_RESPONSE_TO_CYTOKINE		GOBP_REGULATION_OF_IMMUNE_SYSTEM_PROCESS	GOBP_CYTOKINE_MEDIATED_SIGNALING_PATHWAY					GOBP_REGULATION_OF_IMMUNE_RESPONSE		GOBP_REGULATION_OF_RESPONSE_TO_BIOTIC_STIMULUS
XAF1	GOBP_DEFENSE_RESPONSE	GOBP_RESPONSE_TO_BIOTIC_STIMULUS	GOBP_DEFENSE_RESPONSE_TO_OTHER_ORGANISM			GOBP_INNATE_IMMUNE_RESPONSE		GOBP_RESPONSE_TO_CYTOKINE			GOBP_CYTOKINE_MEDIATED_SIGNALING_PATHWAY	GOBP_RESPONSE_TO_TYPE_I_INTERFERON
MT2A	GOBP_DEFENSE_RESPONSE	GOBP_RESPONSE_TO_BIOTIC_STIMULUS	GOBP_DEFENSE_RESPONSE_TO_OTHER_ORGANISM			GOBP_INNATE_IMMUNE_RESPONSE		GOBP_RESPONSE_TO_CYTOKINE			GOBP_CYTOKINE_MEDIATED_SIGNALING_PATHWAY
GBP6	GOBP_DEFENSE_RESPONSE	GOBP_RESPONSE_TO_BIOTIC_STIMULUS	GOBP_DEFENSE_RESPONSE_TO_OTHER_ORGANISM			GOBP_INNATE_IMMUNE_RESPONSE		GOBP_RESPONSE_TO_CYTOKINE
HMGB2	GOBP_DEFENSE_RESPONSE	GOBP_RESPONSE_TO_BIOTIC_STIMULUS	GOBP_DEFENSE_RESPONSE_TO_OTHER_ORGANISM			GOBP_INNATE_IMMUNE_RESPONSE				GOBP_REGULATION_OF_IMMUNE_SYSTEM_PROCESS						GOBP_REGULATION_OF_IMMUNE_RESPONSE		GOBP_REGULATION_OF_RESPONSE_TO_BIOTIC_STIMULUS	GOBP_POSITIVE_REGULATION_OF_IMMUNE_SYSTEM_PROCESS	GOBP_CYTOKINE_PRODUCTION
CLEC4E	GOBP_DEFENSE_RESPONSE	GOBP_RESPONSE_TO_BIOTIC_STIMULUS	GOBP_DEFENSE_RESPONSE_TO_OTHER_ORGANISM			GOBP_INNATE_IMMUNE_RESPONSE				GOBP_REGULATION_OF_IMMUNE_SYSTEM_PROCESS						GOBP_REGULATION_OF_IMMUNE_RESPONSE		GOBP_REGULATION_OF_RESPONSE_TO_BIOTIC_STIMULUS	GOBP_POSITIVE_REGULATION_OF_IMMUNE_SYSTEM_PROCESS
TASL	GOBP_DEFENSE_RESPONSE	GOBP_RESPONSE_TO_BIOTIC_STIMULUS	GOBP_DEFENSE_RESPONSE_TO_OTHER_ORGANISM			GOBP_INNATE_IMMUNE_RESPONSE				GOBP_REGULATION_OF_IMMUNE_SYSTEM_PROCESS						GOBP_REGULATION_OF_IMMUNE_RESPONSE		GOBP_REGULATION_OF_RESPONSE_TO_BIOTIC_STIMULUS	GOBP_POSITIVE_REGULATION_OF_IMMUNE_SYSTEM_PROCESS
TRAFD1	GOBP_DEFENSE_RESPONSE	GOBP_RESPONSE_TO_BIOTIC_STIMULUS	GOBP_DEFENSE_RESPONSE_TO_OTHER_ORGANISM			GOBP_INNATE_IMMUNE_RESPONSE				GOBP_REGULATION_OF_IMMUNE_SYSTEM_PROCESS						GOBP_REGULATION_OF_IMMUNE_RESPONSE		GOBP_REGULATION_OF_RESPONSE_TO_BIOTIC_STIMULUS
TNFAIP8L2	GOBP_DEFENSE_RESPONSE	GOBP_RESPONSE_TO_BIOTIC_STIMULUS	GOBP_DEFENSE_RESPONSE_TO_OTHER_ORGANISM			GOBP_INNATE_IMMUNE_RESPONSE				GOBP_REGULATION_OF_IMMUNE_SYSTEM_PROCESS
TLR5	GOBP_DEFENSE_RESPONSE	GOBP_RESPONSE_TO_BIOTIC_STIMULUS	GOBP_DEFENSE_RESPONSE_TO_OTHER_ORGANISM			GOBP_INNATE_IMMUNE_RESPONSE														GOBP_CYTOKINE_PRODUCTION
APOL1	GOBP_DEFENSE_RESPONSE	GOBP_RESPONSE_TO_BIOTIC_STIMULUS	GOBP_DEFENSE_RESPONSE_TO_OTHER_ORGANISM			GOBP_INNATE_IMMUNE_RESPONSE
ANG	GOBP_DEFENSE_RESPONSE	GOBP_RESPONSE_TO_BIOTIC_STIMULUS	GOBP_DEFENSE_RESPONSE_TO_OTHER_ORGANISM			GOBP_INNATE_IMMUNE_RESPONSE
H2BC7	GOBP_DEFENSE_RESPONSE	GOBP_RESPONSE_TO_BIOTIC_STIMULUS	GOBP_DEFENSE_RESPONSE_TO_OTHER_ORGANISM			GOBP_INNATE_IMMUNE_RESPONSE
H2BC6	GOBP_DEFENSE_RESPONSE	GOBP_RESPONSE_TO_BIOTIC_STIMULUS	GOBP_DEFENSE_RESPONSE_TO_OTHER_ORGANISM			GOBP_INNATE_IMMUNE_RESPONSE
CTSG	GOBP_DEFENSE_RESPONSE	GOBP_RESPONSE_TO_BIOTIC_STIMULUS	GOBP_DEFENSE_RESPONSE_TO_OTHER_ORGANISM				GOBP_IMMUNE_EFFECTOR_PROCESS			GOBP_REGULATION_OF_IMMUNE_SYSTEM_PROCESS						GOBP_REGULATION_OF_IMMUNE_RESPONSE			GOBP_POSITIVE_REGULATION_OF_IMMUNE_SYSTEM_PROCESS
MPO	GOBP_DEFENSE_RESPONSE	GOBP_RESPONSE_TO_BIOTIC_STIMULUS	GOBP_DEFENSE_RESPONSE_TO_OTHER_ORGANISM				GOBP_IMMUNE_EFFECTOR_PROCESS
BATF2	GOBP_DEFENSE_RESPONSE	GOBP_RESPONSE_TO_BIOTIC_STIMULUS	GOBP_DEFENSE_RESPONSE_TO_OTHER_ORGANISM
STAP1	GOBP_DEFENSE_RESPONSE	GOBP_RESPONSE_TO_BIOTIC_STIMULUS					GOBP_IMMUNE_EFFECTOR_PROCESS	GOBP_RESPONSE_TO_CYTOKINE		GOBP_REGULATION_OF_IMMUNE_SYSTEM_PROCESS	GOBP_CYTOKINE_MEDIATED_SIGNALING_PATHWAY					GOBP_REGULATION_OF_IMMUNE_RESPONSE			GOBP_POSITIVE_REGULATION_OF_IMMUNE_SYSTEM_PROCESS
CXCL11	GOBP_DEFENSE_RESPONSE	GOBP_RESPONSE_TO_BIOTIC_STIMULUS						GOBP_RESPONSE_TO_CYTOKINE			GOBP_CYTOKINE_MEDIATED_SIGNALING_PATHWAY
SOCS5	GOBP_DEFENSE_RESPONSE						GOBP_IMMUNE_EFFECTOR_PROCESS	GOBP_RESPONSE_TO_CYTOKINE		GOBP_REGULATION_OF_IMMUNE_SYSTEM_PROCESS	GOBP_CYTOKINE_MEDIATED_SIGNALING_PATHWAY					GOBP_REGULATION_OF_IMMUNE_RESPONSE			GOBP_POSITIVE_REGULATION_OF_IMMUNE_SYSTEM_PROCESS	GOBP_CYTOKINE_PRODUCTION
IL18R1	GOBP_DEFENSE_RESPONSE						GOBP_IMMUNE_EFFECTOR_PROCESS	GOBP_RESPONSE_TO_CYTOKINE		GOBP_REGULATION_OF_IMMUNE_SYSTEM_PROCESS	GOBP_CYTOKINE_MEDIATED_SIGNALING_PATHWAY					GOBP_REGULATION_OF_IMMUNE_RESPONSE			GOBP_POSITIVE_REGULATION_OF_IMMUNE_SYSTEM_PROCESS	GOBP_CYTOKINE_PRODUCTION
C3AR1	GOBP_DEFENSE_RESPONSE						GOBP_IMMUNE_EFFECTOR_PROCESS			GOBP_REGULATION_OF_IMMUNE_SYSTEM_PROCESS						GOBP_REGULATION_OF_IMMUNE_RESPONSE			GOBP_POSITIVE_REGULATION_OF_IMMUNE_SYSTEM_PROCESS	GOBP_CYTOKINE_PRODUCTION
TNFAIP6	GOBP_DEFENSE_RESPONSE						GOBP_IMMUNE_EFFECTOR_PROCESS
THBS1	GOBP_DEFENSE_RESPONSE							GOBP_RESPONSE_TO_CYTOKINE		GOBP_REGULATION_OF_IMMUNE_SYSTEM_PROCESS									GOBP_POSITIVE_REGULATION_OF_IMMUNE_SYSTEM_PROCESS	GOBP_CYTOKINE_PRODUCTION
FN1	GOBP_DEFENSE_RESPONSE							GOBP_RESPONSE_TO_CYTOKINE			GOBP_CYTOKINE_MEDIATED_SIGNALING_PATHWAY									GOBP_CYTOKINE_PRODUCTION
MYLK3	GOBP_DEFENSE_RESPONSE							GOBP_RESPONSE_TO_CYTOKINE
MACIR	GOBP_DEFENSE_RESPONSE																			GOBP_CYTOKINE_PRODUCTION
INHBB	GOBP_DEFENSE_RESPONSE																			GOBP_CYTOKINE_PRODUCTION
CALCRL	GOBP_DEFENSE_RESPONSE
SIGLEC1	GOBP_DEFENSE_RESPONSE
TMIGD3	GOBP_DEFENSE_RESPONSE
TPST1	GOBP_DEFENSE_RESPONSE
CYSLTR1	GOBP_DEFENSE_RESPONSE
APOL2	GOBP_DEFENSE_RESPONSE
CD163	GOBP_DEFENSE_RESPONSE
LGALS3BP	GOBP_DEFENSE_RESPONSE
IFI44		GOBP_RESPONSE_TO_BIOTIC_STIMULUS			GOBP_RESPONSE_TO_VIRUS
PRKCE		GOBP_RESPONSE_TO_BIOTIC_STIMULUS					GOBP_IMMUNE_EFFECTOR_PROCESS			GOBP_REGULATION_OF_IMMUNE_SYSTEM_PROCESS						GOBP_REGULATION_OF_IMMUNE_RESPONSE			GOBP_POSITIVE_REGULATION_OF_IMMUNE_SYSTEM_PROCESS
CARD17		GOBP_RESPONSE_TO_BIOTIC_STIMULUS																		GOBP_CYTOKINE_PRODUCTION
FAP		GOBP_RESPONSE_TO_BIOTIC_STIMULUS
CHMP5		GOBP_RESPONSE_TO_BIOTIC_STIMULUS
DACH1		GOBP_RESPONSE_TO_BIOTIC_STIMULUS
HMCN1		GOBP_RESPONSE_TO_BIOTIC_STIMULUS
CMPK2		GOBP_RESPONSE_TO_BIOTIC_STIMULUS
FKBP5		GOBP_RESPONSE_TO_BIOTIC_STIMULUS
BTN3A3							GOBP_IMMUNE_EFFECTOR_PROCESS			GOBP_REGULATION_OF_IMMUNE_SYSTEM_PROCESS						GOBP_REGULATION_OF_IMMUNE_RESPONSE			GOBP_POSITIVE_REGULATION_OF_IMMUNE_SYSTEM_PROCESS	GOBP_CYTOKINE_PRODUCTION
NBN							GOBP_IMMUNE_EFFECTOR_PROCESS
EXO1							GOBP_IMMUNE_EFFECTOR_PROCESS
JUP							GOBP_IMMUNE_EFFECTOR_PROCESS
GAPT							GOBP_IMMUNE_EFFECTOR_PROCESS
GYG1							GOBP_IMMUNE_EFFECTOR_PROCESS
MCEMP1							GOBP_IMMUNE_EFFECTOR_PROCESS
GGH							GOBP_IMMUNE_EFFECTOR_PROCESS
HSPA6							GOBP_IMMUNE_EFFECTOR_PROCESS
PTPRN2							GOBP_IMMUNE_EFFECTOR_PROCESS
PLVAP								GOBP_RESPONSE_TO_CYTOKINE		GOBP_REGULATION_OF_IMMUNE_SYSTEM_PROCESS	GOBP_CYTOKINE_MEDIATED_SIGNALING_PATHWAY								GOBP_POSITIVE_REGULATION_OF_IMMUNE_SYSTEM_PROCESS
H3C4								GOBP_RESPONSE_TO_CYTOKINE		GOBP_REGULATION_OF_IMMUNE_SYSTEM_PROCESS	GOBP_CYTOKINE_MEDIATED_SIGNALING_PATHWAY
SFRP1								GOBP_RESPONSE_TO_CYTOKINE		GOBP_REGULATION_OF_IMMUNE_SYSTEM_PROCESS
FOXC1								GOBP_RESPONSE_TO_CYTOKINE			GOBP_CYTOKINE_MEDIATED_SIGNALING_PATHWAY
BIRC5								GOBP_RESPONSE_TO_CYTOKINE			GOBP_CYTOKINE_MEDIATED_SIGNALING_PATHWAY
MAOA								GOBP_RESPONSE_TO_CYTOKINE			GOBP_CYTOKINE_MEDIATED_SIGNALING_PATHWAY
NR5A2								GOBP_RESPONSE_TO_CYTOKINE						GOBP_REGULATION_OF_VIRAL_LIFE_CYCLE	GOBP_REGULATION_OF_VIRAL_GENOME_REPLICATION		GOBP_REGULATION_OF_BIOLOGICAL_PROCESS_INVOLVED_IN_SYMBIOTIC_INTERACTION
SPRY2								GOBP_RESPONSE_TO_CYTOKINE
MYBL2								GOBP_RESPONSE_TO_CYTOKINE
MCM2								GOBP_RESPONSE_TO_CYTOKINE
TIMP3								GOBP_RESPONSE_TO_CYTOKINE
AANAT								GOBP_RESPONSE_TO_CYTOKINE
MT1X								GOBP_RESPONSE_TO_CYTOKINE
LY6E									GOBP_NEGATIVE_REGULATION_OF_VIRAL_PROCESS					GOBP_REGULATION_OF_VIRAL_LIFE_CYCLE			GOBP_REGULATION_OF_BIOLOGICAL_PROCESS_INVOLVED_IN_SYMBIOTIC_INTERACTION
BTN2A2										GOBP_REGULATION_OF_IMMUNE_SYSTEM_PROCESS						GOBP_REGULATION_OF_IMMUNE_RESPONSE			GOBP_POSITIVE_REGULATION_OF_IMMUNE_SYSTEM_PROCESS	GOBP_CYTOKINE_PRODUCTION
BTN3A1										GOBP_REGULATION_OF_IMMUNE_SYSTEM_PROCESS						GOBP_REGULATION_OF_IMMUNE_RESPONSE			GOBP_POSITIVE_REGULATION_OF_IMMUNE_SYSTEM_PROCESS	GOBP_CYTOKINE_PRODUCTION
BTN1A1										GOBP_REGULATION_OF_IMMUNE_SYSTEM_PROCESS						GOBP_REGULATION_OF_IMMUNE_RESPONSE			GOBP_POSITIVE_REGULATION_OF_IMMUNE_SYSTEM_PROCESS	GOBP_CYTOKINE_PRODUCTION
BTN2A3P										GOBP_REGULATION_OF_IMMUNE_SYSTEM_PROCESS						GOBP_REGULATION_OF_IMMUNE_RESPONSE			GOBP_POSITIVE_REGULATION_OF_IMMUNE_SYSTEM_PROCESS	GOBP_CYTOKINE_PRODUCTION
PAWR										GOBP_REGULATION_OF_IMMUNE_SYSTEM_PROCESS						GOBP_REGULATION_OF_IMMUNE_RESPONSE			GOBP_POSITIVE_REGULATION_OF_IMMUNE_SYSTEM_PROCESS
BMX										GOBP_REGULATION_OF_IMMUNE_SYSTEM_PROCESS						GOBP_REGULATION_OF_IMMUNE_RESPONSE			GOBP_POSITIVE_REGULATION_OF_IMMUNE_SYSTEM_PROCESS
ZBTB16										GOBP_REGULATION_OF_IMMUNE_SYSTEM_PROCESS									GOBP_POSITIVE_REGULATION_OF_IMMUNE_SYSTEM_PROCESS
GPNMB										GOBP_REGULATION_OF_IMMUNE_SYSTEM_PROCESS										GOBP_CYTOKINE_PRODUCTION
SDC4										GOBP_REGULATION_OF_IMMUNE_SYSTEM_PROCESS
HLA-DOB										GOBP_REGULATION_OF_IMMUNE_SYSTEM_PROCESS
H4C4										GOBP_REGULATION_OF_IMMUNE_SYSTEM_PROCESS
H4C8										GOBP_REGULATION_OF_IMMUNE_SYSTEM_PROCESS
ALOX15B																				GOBP_CYTOKINE_PRODUCTION
UBE2L6																				GOBP_CYTOKINE_PRODUCTION
POLR3GL																				GOBP_CYTOKINE_PRODUCTION

## Sheet: GSEA-C7
Gene Set Name	# Genes in Gene Set (K)	Description	# Genes in Overlap (k)	k/K	p-value	FDR q-value
HARALAMBIEVA_PBMC_M_M_R_II_AGE_11_22YO_VACCINATED_VS_UNVACCINATED_7YR_UP	973	Genes up-regulated in peripheral blood mononuclear cell vaccinated vs unvaccinated in adolescent/young adults (11-22) after exposure to M-M-R II , time point 7Y	140	0.1439	1.3e-120	6.77e-117
OSMAN_BLOOD_CHAD63_KH_AGE_18_50YO_HIGH_DOSE_SUBJECTS_24HR_UP	1992	Genes up-regulated in blood 24hr vs 0hr in adults (18-50) (high dose subjects) after exposure to ChAd63-KH , time point 24H , administered Intramuscular injection. Comment: DE gene list for high dose subjects.	178	0.0894	4.34e-120	1.13e-116
GSE13485_CTRL_VS_DAY7_YF17D_VACCINE_PBMC_DN	200	Genes down-regulated in comparison of unstimulated peripheral blood mononuclear cells (PBMC) versus PBMC 7 days after stimulation with YF17D vaccine.	84	0.42	2.61e-114	4.54e-111
GAUCHER_PBMC_YF_VAX_STAMARIL_UNKNOWN_AGE_10DY_UP	196	Genes up-regulated in peripheral blood mononuclear cell 10d vs 0d in unknown after exposure to YF-Vax/Stamaril , time point 10D	83	0.4235	2.67e-113	3.39e-110
GAUCHER_PBMC_YF_VAX_STAMARIL_UNKNOWN_AGE_7DY_UP	292	Genes up-regulated in peripheral blood mononuclear cell 7d vs 0d in unknown after exposure to YF-Vax/Stamaril , time point 7D	93	0.3185	3.25e-113	3.39e-110
HOWARD_NEUTROPHIL_INACT_MONOV_INFLUENZA_A_INDONESIA_05_2005_H5N1_AGE_18_49YO_1DY_UP	394	Genes up-regulated in neutrophil 1d vs 0d in adults (18-49) after exposure to inactivated monovalent influenza A/Indonesia/05/2005 H5N1 split-virus vaccine , time point 1D , administered i.m.	100	0.2538	1.06e-110	9.25e-108
ZAK_PBMC_MRKAD5_HIV_1_GAG_POL_NEF_AGE_20_50YO_1DY_UP	1012	Genes up-regulated in peripheral blood mononuclear cell 1d vs 0d in adults (20-50) after exposure to MRKAd5 HIV-1 gag/pol/nef , time point 1D. Comment: Table includes specific cell types	132	0.1304	1.97e-107	1.47e-104
ERWIN_COHEN_BLOOD_TC_83_AGE_23_48YO_VACCINATED_VS_CONTROL_2DY_UP	119	Genes up-regulated in blood vaccinated vs control in adults (23-48) after exposure to Live attenuated vaccine TC-83 , time point 2D	67	0.563	2.25e-102	1.47e-99
GSE42724_NAIVE_BCELL_VS_PLASMABLAST_UP	197	Genes up-regulated in B lymphocytes: naÔve versus plasmablasts.	76	0.3858	1.03e-99	5.95e-97
GAUCHER_PBMC_YF_VAX_STAMARIL_UNKNOWN_AGE_3DY_UP	219	Genes up-regulated in peripheral blood mononuclear cell 3d vs 0d in unknown after exposure to YF-Vax/Stamaril , time point 3D	78	0.3562	4.51e-99	2.35e-96
GSE13485_DAY3_VS_DAY7_YF17D_VACCINE_PBMC_DN	198	Genes down-regulated in comparison of unstimulated peripheral blood mononuclear cells (PBMC) 3 days after stimulation with YF17D vaccine versus PBMC 7 days after the stimulation.	75	0.3788	1.2e-97	5.7e-95
HOWARD_NEUTROPHIL_INACT_MONOV_INFLUENZA_A_INDONESIA_05_2005_H5N1_AGE_18_49YO_3DY_UP	119	Genes up-regulated in neutrophil 3d vs 0d in adults (18-49) after exposure to inactivated monovalent influenza A/Indonesia/05/2005 H5N1 split-virus vaccine , time point 3D , administered i.m.	64	0.5378	6.18e-96	2.69e-93
ERWIN_COHEN_BLOOD_VACCINE_TC_83_AGE_23_48YO_VACCINATED_VS_CONTROL_7DY_UP	72	Genes up-regulated in blood vaccinated vs control in adults (23-48) after exposure to Live attenuated vaccine TC-83 , time point 7D	53	0.7361	1.14e-90	4.56e-88
GSE13485_DAY1_VS_DAY7_YF17D_VACCINE_PBMC_DN	198	Genes down-regulated in comparison of unstimulated peripheral blood mononuclear cells (PBMC) 1 day after stimulation with YF17D vaccine versus PBMC 7 days after the stimulation.	69	0.3485	1.06e-86	3.97e-84
GSE13485_CTRL_VS_DAY3_YF17D_VACCINE_PBMC_DN	199	Genes down-regulated in comparison of unstimulated peripheral blood mononuclear cells (PBMC) versus PBMC 3 days after stimulation with YF17D vaccine.	68	0.3417	9.81e-85	3.41e-82
GSE13484_UNSTIM_VS_YF17D_VACCINE_STIM_PBMC_DN	200	Genes down-regulated in comparison of unstimulated peripheral blood mononuclear cells (PBMC) versus PBMC stimulated with YF17D vaccine.	68	0.34	1.47e-84	4.81e-82
ZAK_PBMC_MRKAD5_HIV_1_GAG_POL_NEF_AGE_20_50YO_3DY_UP	131	Genes up-regulated in peripheral blood mononuclear cell 3d vs 0d in adults (20-50) after exposure to MRKAd5 HIV-1 gag/pol/nef , time point 3D. Comment: Table includes specific cell types	59	0.4504	2.99e-82	9.17e-80
GSE13485_PRE_VS_POST_YF17D_VACCINATION_PBMC_DN	198	Genes down-regulated in comparison of peripheral blood mononuclear cells (PBMC) before vs after YF17D vaccination.	66	0.3333	2.26e-81	6.56e-79
FRANCO_BLOOD_SANOFI_PASTEUR_SA_INACTIVATED_INFLUENZA_VACCINE_CORRELATED_WITH_ANTIBODY_RESPONSE_AGE_18_40YO_1DY_POSITIVE	129	Genes positively correlated with antibody response in blood in adults (18-40) after exposure to Sanofi Pasteur, SA, Inactivated influenza vaccine , time point 1D	58	0.4496	8.51e-81	2.34e-78
GSE21546_WT_VS_SAP1A_KO_DP_THYMOCYTES_UP	196	Genes up-regulated in untreated double positive thymocytes: wildtype versus ELK4 [GeneID=2005] knockout.	65	0.3316	5.88e-80	1.53e-77
[truncated: 227 more rows]

## Sheet: gene families
	cytokines and growth factors	transcription factors	homeodomain proteins	cell differentiation markers	protein kinases	translocated cancer genes	oncogenes	tumor suppressors
tumor suppressors	0	0	0	0	1	0	0	2
oncogenes	0	3	1	0	0	3	3
translocated cancer genes	0	3	1	0	0	3
protein kinases	0	0	0	0	13
cell differentiation markers	1	0	0	11
homeodomain proteins	0	2	2
transcription factors	0	24
cytokines and growth factors	11

## Sheet: ranked gene list
NAME	SCORE	TITLE
SIGLEC8	2.84631	sialic acid binding Ig like lectin 8 [Source:HGNC Symbol;Acc:HGNC:10877]
SMPD3	2.77344	sphingomyelin phosphodiesterase 3 [Source:HGNC Symbol;Acc:HGNC:14240]
CACNG8	2.51427	calcium voltage+gated channel auxiliary subunit gamma 8 [Source:HGNC Symbol;Acc:HGNC:13628]
PRSS33	2.32285	serine protease 33 [Source:HGNC Symbol;Acc:HGNC:30405]
[truncated: 7,224 more rows]
