# Supplementary material for: Impact of BNT162b First Vaccination on the Immune Transcriptome of Elderly Patients Infected with the B.1.351 SARS-CoV-2 Variant
Source: Res Sq. 2021 Jun 1:rs.3.rs-509143. Preprint. [Version 1] doi: 10.21203/rs.3.rs-509143/v1 (PMC8183022; doi:10.21203/rs.3.rs-509143/v1)
Supplement: Supplement 3 [file b444ce574a36ea827ea5c3be.xlsx]

## Sheet: B1351_Healthy vs 1st-allGenes-w
	Healthy					B.1.351 variant
Gene	Healthy_1	Healthy_2	Healthy_3	Healthy_4	Healthy_5	ID1_1st	ID2_1st	ID3_1st	ID4_1st	ID5_1st	ID6_1st	ID7_1st	ID14_1st	ID24_1st	log2FoldChange	pvalue	padj	meanHealthy	mean1st
A1BG	1.90068	3.15242	6.04822	2.26456	3.78216	3.59139	2.08229	7.60108	1.24235	6.04056	3.39224	2.14926	1.90789	17.0435	0.599313	0.394358	0.487474	3.42961	5.00562
A1BG-AS1	18.3732	28.3718	42.3376	30.1942	18.2804	26.3369	17.6995	21.5364	14.9082	8.45679	6.78447	3.22389	29.5724	19.0486	-0.830184	0.00662996	0.0141213	27.5114	16.3963
A1CF	6.3356	15.7621	7.1479	10.568	8.82503	3.59139	2.08229	1.26685	1.24235	4.83245	3.39224	3.22389	3.81579	10.0256	-1.40919	0.00458807	0.010161	9.72772	3.7192
A2M	356.061	433.233	609.221	618.226	559.129	52.6738	162.419	32.938	98.1457	57.9894	84.8059	185.911	62.9605	108.276	-2.54364	3.30672e-20	1.09225e-18	515.174	94.0132
A2M-AS1	82.9963	88.2678	67.6301	82.2792	57.9931	21.5484	59.3452	6.33424	11.1812	21.746	35.6185	38.6867	24.8026	31.0793	-1.51317	0.000121309	0.000372638	75.8333	27.8158
A2ML1	18.3732	15.3118	6.04822	3.01942	10.0858	4.78852	1.04114	1.26685	0	6.04056	5.08835	2.14926	0.953947	1.00256	-2.15929	0.000930975	0.00239659	10.5677	2.48124
A2MP1	215.41	263.903	280.967	366.859	339.764	83.7992	102.032	6.33424	6.21175	32.619	69.5408	182.687	61.0526	69.1765	-2.48703	1.33663e-09	9.39552e-09	293.381	68.1615
A3GALT2	86.7977	22.9676	69.8295	85.2986	47.9073	489.627	351.907	273.639	639.811	437.337	754.773	580.3	156.447	326.834	2.78124	2.17147e-27	1.77007e-25	62.5601	445.63
A4GNT	0	7.20553	2.74919	6.79369	1.89108	5.98565	7.28801	16.469	8.69646	8.45679	1.69612	1.07463	2.86184	4.01023	0.536332	0.362014	0.454353	3.7279	6.28208
AAAS	701.984	827.285	715.34	705.789	670.703	803.275	721.513	689.165	740.441	752.654	613.995	894.092	771.743	708.808	0.0450364	0.571628	0.655937	724.22	743.965
AACS	248.989	197.702	225.984	185.694	253.405	155.627	163.46	116.55	224.866	175.176	150.955	147.224	176.48	155.396	-0.455273	0.00626544	0.0134235	222.355	162.859
AAED1	321.848	301.281	379.938	420.454	358.044	173.584	249.875	271.105	323.011	256.12	218.799	252.538	340.559	437.115	-0.35425	0.035619	0.0630809	356.313	280.301
AAGAB	1780.3	1931.08	1981.62	2247.2	1983.11	1786.12	1910.5	2223.32	2025.03	2097.28	1497.67	1510.93	1926.02	2293.85	-0.0553404	0.603732	0.683313	1984.66	1918.97
AAK1	11248.9	10203	10074.1	9969.37	9756.07	5045.91	5851.23	4393.43	4594.21	4354.04	4842.42	7387.01	7449.37	8009.43	-0.844252	1.17295e-09	8.31265e-09	10250.3	5769.67
AAMDC	173.595	163.025	181.997	155.5	136.158	114.925	197.817	207.763	248.47	184.841	152.651	92.4182	219.408	186.476	0.0944768	0.593382	0.674372	162.055	178.308
AAMP	1428.68	1905.41	1678.66	1725.6	1666.04	1277.34	1085.91	1691.24	1259.74	1215.36	912.512	896.241	1425.2	1102.81	-0.499581	2.5629e-05	8.91361e-05	1680.88	1207.37
AANAT	34.8458	35.127	37.389	39.2525	54.2109	126.896	135.349	182.426	537.938	240.414	145.866	290.15	181.25	411.048	2.66514	2.42568e-10	1.92283e-09	40.165	250.149
AAR2	710.22	937.17	964.417	866.573	760.214	286.114	582	603.019	500.667	589.559	432.51	562.031	717.368	694.772	-0.621098	5.55751e-05	0.00018152	847.719	552.005
AARD	3.80136	6.30484	4.39871	2.26456	1.26072	0	1.04114	2.53369	0	4.83245	3.39224	4.29852	5.72368	0	-0.544373	0.553294	0.639683	3.60604	2.42464
AARS	824.895	1125.86	906.684	1021.32	876.83	791.304	672.579	686.631	550.361	1258.85	346.008	485.733	1044.57	885.258	-0.380386	0.0544768	0.0914835	951.118	746.811
AARS2	316.146	428.279	375.54	315.529	331.569	180.767	215.517	195.094	200.018	240.414	176.396	246.09	270.921	320.818	-0.629395	4.07388e-09	2.65727e-08	353.413	227.337
AASDH	643.063	756.131	790.668	702.015	649.27	487.232	497.667	315.445	407.491	443.377	322.262	498.628	816.579	400.02	-0.63304	8.7387e-08	4.61424e-07	708.229	465.411
AASDHPPT	896.487	1014.63	913.282	774.481	863.593	763.77	740.254	591.618	588.874	734.532	444.383	477.136	1227.73	691.765	-0.395425	0.00062621	0.00167468	892.494	695.562
AASS	504.313	487.274	523.446	301.942	512.482	228.652	236.34	91.213	131.689	142.557	162.827	205.254	110.658	229.586	-1.45582	3.44581e-08	1.94839e-07	465.892	170.975
AATBC	190.068	195.45	166.051	166.823	151.286	123.304	97.8676	209.03	93.1763	146.182	55.9719	95.6421	230.855	123.315	-0.505049	0.0332813	0.05937	173.936	130.594
AATF	2319.46	1935.14	2109.73	2289.48	2364.48	2591.79	2582.04	3488.9	2975.43	2713.42	3638.17	2726.34	2444.97	2443.23	0.347323	4.19148e-07	1.97737e-06	2203.66	2844.92
AATK	40.5478	22.5173	27.4919	18.8714	52.3198	226.258	336.29	309.111	493.213	251.287	803.96	274.031	93.4868	197.504	3.16937	4.73149e-15	7.4763e-14	32.3497	331.682
ABALON	12.6712	5.8545	15.3955	12.0777	6.93395	3.59139	11.4526	29.1375	9.93881	4.83245	33.9224	20.418	7.63158	12.0307	0.35398	0.378596	0.471613	10.5866	14.7728
ABAT	3627.13	1255.56	1966.22	1769.38	2626.08	2536.72	1768.9	4171.73	2784.11	3545.81	3326.09	1824.72	1536.81	1905.86	0.152862	0.408303	0.502088	2248.87	2600.08
ABCA1	4822.02	1818.95	4384.96	4064.14	5218.75	16234.3	7673.23	17454.6	36354.9	27706.9	22970.5	13270.6	18044.9	22660.8	2.33415	4.51821e-16	8.40714e-15	4061.76	20263.4
ABCA10	136.849	96.374	83.0256	94.3569	76.9039	198.724	149.925	114.016	140.386	164.303	232.368	132.179	88.7171	99.2532	0.563344	0.00717299	0.0151542	97.5019	146.652
ABCA11P	148.887	171.582	141.309	129.08	87.62	87.3906	78.0858	30.4043	60.8752	26.5785	39.0107	78.448	103.98	61.156	-1.12965	1.05946e-06	4.72132e-06	135.695	62.881
ABCA12	4.43492	4.05311	3.84887	6.79369	8.19467	5.98565	6.24687	0	0	0	1.69612	4.29852	0.953947	7.0179	-1.23695	0.0825226	0.130591	5.46505	2.911
ABCA13	196.403	74.3071	131.961	2421.57	390.193	457.304	2674.7	1156.63	3001.52	368.474	1334.85	400.837	663.947	421.074	1.04721	0.190452	0.266425	642.888	1164.37
ABCA17P	3.1678	5.40415	2.74919	0	4.41252	4.78852	6.24687	1.26685	1.24235	2.41623	6.78447	5.37315	4.76973	2.00511	0.259445	0.665548	0.737079	3.14673	3.87703
ABCA2	713.388	812.874	830.256	663.517	958.146	2110.54	1702.27	2182.78	3397.83	2656.64	3449.9	2487.77	1072.24	2398.12	1.50593	9.27111e-10	6.69824e-09	795.637	2384.23
ABCA3	75.3936	125.647	85.225	78.5049	95.8146	47.8852	102.032	49.407	55.9058	55.5732	54.2758	62.3285	64.8684	48.1227	-0.592757	0.0713343	0.115356	92.1169	60.0443
ABCA4	1.26712	2.70208	1.64952	0	2.52144	0	0	0	2.4847	2.41623	6.78447	1.07463	0.953947	0	-0.54353	0.589602	0.671392	1.62803	1.52378
ABCA5	3094.94	2188.68	1937.63	2616.33	2053.71	3225.07	2506.03	1736.85	2400.22	3092.77	4148.71	2808.01	1614.08	1760.49	0.0934522	0.628777	0.705188	2378.26	2588.02
ABCA6	45.6163	60.3464	45.0868	52.085	35.9305	53.8709	22.9052	15.2022	29.8164	33.8272	32.2262	1668.9	138.322	11.0281	0.703845	0.387331	0.480476	47.813	222.9
ABCA7	1929.19	894.387	956.719	1306.65	941.127	5423	5911.62	6364.64	5180.6	6107.01	6998.18	2549.02	1465.26	4487.45	1.96651	1.67886e-12	1.83467e-11	1205.62	4942.98
ABCA9	38.6471	34.6766	20.8939	27.9296	25.2144	58.6594	39.5635	31.6712	26.0894	45.9083	57.668	1058.51	40.0658	15.0384	1.28449	0.070189	0.113794	29.4723	152.575
ABCB1	935.134	1272.23	1468.07	856.005	1109.43	181.964	507.037	73.4771	69.5717	200.547	184.877	706.032	622.927	319.816	-2.07009	1.41947e-11	1.34733e-10	1128.17	318.472
ABCB10	1459.09	1617.64	1465.32	1555.76	1400.03	1219.88	1573.17	1136.36	1188.93	1090.93	924.384	1365.85	1864.01	1196.05	-0.234213	0.0153194	0.0298944	1499.57	1284.4
ABCB11	13.9383	0.900692	3.84887	12.8325	9.45539	77.8135	26.0286	8.86793	73.2987	18.1217	44.0991	33.3135	90.625	23.0588	2.48318	9.64225e-06	3.65029e-05	8.19516	43.9141
ABCB4	225.547	194.099	183.646	104.17	98.3361	79.0106	52.0572	3.80054	177.656	21.746	11.8728	141.851	66.7763	81.2071	-1.12569	0.0485958	0.0828974	161.16	70.6642
ABCB6	173.595	116.64	133.061	160.784	157.59	446.53	271.739	410.458	386.371	369.682	395.196	284.777	408.289	219.56	1.25236	1.88409e-07	9.44431e-07	148.334	354.734
ABCB7	1037.77	1137.57	1118.92	1194.94	1081.7	700.322	720.472	737.305	561.543	578.686	424.03	661.972	1048.39	624.593	-0.750593	5.97658e-13	6.97255e-12	1114.18	673.034
ABCB8	223.647	273.36	213.337	187.959	224.408	184.358	216.558	210.297	229.835	188.466	181.485	238.568	176.48	297.76	-0.061526	0.728358	0.789055	224.542	213.756
ABCB9	16.4726	14.8614	24.7427	6.79369	6.3036	44.2938	13.5349	12.6685	21.12	50.7407	5.08835	51.5822	20.0329	36.0921	1.03576	0.00831969	0.0172827	13.8348	28.3504
ABCC1	2484.82	2110.77	2738.2	2395.15	2749	1980.05	2003.16	1942.08	2143.06	2047.75	1942.06	1562.51	2273.26	1870.77	-0.349281	0.00471488	0.0104091	2495.59	1973.85
ABCC10	677.275	679.572	627.916	634.078	707.894	629.691	673.62	689.165	616.206	633.051	574.984	862.928	650.592	659.683	0.00294338	0.978811	0.984982	665.347	665.547
ABCC11	6.3356	4.95381	3.84887	3.01942	8.82503	156.824	178.036	10.1348	50.9364	107.522	308.694	221.374	103.026	6.01534	4.44442	1.98355e-10	1.59905e-09	5.39654	126.951
ABCC13	0	3.60277	1.64952	0	3.1518	2.39426	1.04114	10.1348	1.24235	0	3.39224	5.37315	0	0	0.119686	0.900927	0.927449	1.68082	2.61977
ABCC2	380.769	219.318	241.929	275.522	226.929	997.21	522.654	983.073	1108.18	984.612	1036.33	645.853	565.691	725.851	1.61383	3.38999e-21	1.30073e-19	268.894	841.05
ABCC3	994.055	606.616	1239.89	1185.12	1613.72	763.77	1487.8	1023.61	300.649	1180.33	1282.27	243.941	832.796	780.992	-0.378754	0.287486	0.376616	1127.88	877.35
ABCC4	871.778	724.156	872.044	788.823	898.893	957.705	1795.97	829.785	286.983	541.234	478.305	494.33	1090.36	1138.91	-0.0068007	0.984656	0.989551	831.139	845.954
ABCC5	3955.31	1960.36	1804.02	2966.58	3470.76	5208.72	3293.14	4370.62	2695.9	4531.63	10870.4	2870.34	2822.73	1203.07	0.462318	0.117492	0.177049	2831.41	4207.4
ABCC5-AS1	9.50339	0	0.549839	3.77427	1.26072	2.39426	3.12343	0	3.72705	1.20811	8.48059	3.22389	0.953947	0	-0.230323	0.816833	0.861655	3.01765	2.56792
ABCC6	532.19	138.707	304.061	395.544	503.657	985.239	819.381	943.801	606.267	774.4	1731.74	990.809	423.552	180.46	1.10759	0.000243846	0.000702999	374.832	828.405
ABCC6P1	12.0376	2.70208	14.8456	6.79369	9.45539	14.3656	9.3703	5.06739	22.3623	3.62434	5.08835	42.9852	15.2632	0	0.40755	0.555492	0.641677	9.16689	13.1252
ABCC8	3.80136	0	0	0	1.26072	0	0	0	8.69646	0	5.08835	0	0.953947	0	0.249635	0.90781	0.932759	1.01242	1.63764
ABCD1	95.0339	123.845	114.366	107.944	112.204	158.021	200.941	297.709	371.463	306.861	212.015	144	229.901	228.583	1.05504	1.80268e-05	6.45273e-05	110.679	238.833
ABCD2	1177.15	1000.22	1018.85	933.756	923.477	172.387	297.767	93.7467	69.5717	147.39	72.9331	344.956	228.947	448.143	-2.48393	8.09353e-30	8.78403e-28	1010.69	208.427
ABCD3	1065.01	1366.8	1229.44	1217.58	1234.87	735.038	831.874	599.219	575.208	718.827	639.437	771.584	1108.49	807.059	-0.704664	1.07177e-08	6.57708e-08	1222.74	754.081
ABCD4	1051.08	1266.37	1253.08	1034.91	1283.41	979.253	1174.41	1035.01	1001.33	941.12	915.904	1210.03	1042.66	986.516	-0.184814	0.116241	0.17547	1177.77	1031.81
ABCE1	2225.06	2572.83	2544.65	2187.57	2111.07	1055.87	1093.2	880.459	713.109	1287.85	612.299	1090.75	1567.33	1449.7	-1.12476	1.00067e-19	3.0605e-18	2328.24	1083.4
ABCF1	1681.47	1836.06	2683.21	2538.58	2236.52	1023.55	1453.44	2178.98	1318.13	1617.66	1399.3	1406.69	1593.09	3426.74	-0.359162	0.118742	0.178635	2195.17	1713.06
ABCF2	1182.22	1563.15	1279.47	1341.38	1199.57	1031.93	851.656	901.995	781.439	920.582	561.415	767.286	1617.89	961.452	-0.525659	2.87898e-12	3.01935e-11	1313.16	932.85
ABCF3	2134.46	1804.54	2109.18	1976.97	2468.49	2120.12	2425.87	2683.18	2156.72	2876.52	4606.66	3695.65	1407.07	2767.06	0.324069	0.013901	0.0273938	2098.73	2748.76
ABCG1	1125.84	551.674	914.931	707.299	1436.59	3317.25	2117.69	3691.59	6345.93	5661.22	6738.68	2460.9	2539.41	2140.46	1.94312	9.65192e-15	1.45722e-13	947.266	3890.35
ABCG2	11.4041	34.2263	47.836	46.801	42.2341	22.7455	19.7817	7.60108	1.24235	2.41623	3.39224	7.52241	31.4802	15.0384	-1.85935	0.000380132	0.00105909	36.5003	12.3578
ABCG4	0	0	0.549839	2.26456	3.78216	2.39426	1.04114	2.53369	1.24235	0	0	0	0	0	-0.644486	0.626215	0.703146	1.31931	0.801272
ABHD1	26.6095	20.2656	20.8939	22.6456	39.7126	32.3225	34.3578	13.9353	16.1506	21.746	15.2651	11.8209	23.8487	19.0486	-0.290076	0.408176	0.501974	26.0254	20.9439
ABHD10	862.275	964.641	765.925	803.921	742.564	677.576	497.667	309.111	406.249	588.351	273.075	548.061	1023.59	554.414	-0.66959	5.64569e-06	2.22651e-05	827.865	542.01
ABHD11	135.582	126.097	96.2217	105.68	126.702	343.577	157.213	222.965	206.23	244.039	262.898	175.165	169.803	123.315	0.81576	5.30355e-05	0.000173763	118.056	211.689
ABHD11-AS1	0	0.900692	0.549839	2.26456	0	15.5627	4.16458	1.26685	14.9082	2.41623	6.78447	4.29852	6.67763	3.00767	3.18361	0.000161288	0.000483863	0.743019	6.56521
ABHD12	374.434	449.445	495.405	421.964	465.205	259.777	310.261	329.38	273.317	347.936	171.308	218.15	333.881	284.726	-0.667823	4.4587e-09	2.89518e-08	441.291	280.971
ABHD12B	545.495	112.136	142.958	366.859	236.385	906.228	644.468	770.243	1098.24	922.998	1148.27	764.062	697.335	554.414	1.61993	5.95665e-11	5.1542e-10	280.767	834.029
ABHD13	4902.48	3988.26	5165.18	5778.41	5613.35	4710.71	4114.6	4279.41	4631.48	4395.11	6056.84	5451.6	3480.95	4114.49	-0.166692	0.071686	0.115855	5089.54	4581.69
ABHD14A	41.8149	39.6304	28.5916	32.4588	38.4519	20.3512	34.3578	11.4016	16.1506	25.3704	40.7068	23.6419	28.6184	24.0614	-0.543147	0.0467989	0.0801561	36.1895	24.9622
ABHD14B	730.494	884.93	828.057	727.68	677.006	492.021	635.098	283.774	354.07	373.307	254.418	448.121	535.164	412.051	-0.881333	1.77617e-10	1.43981e-09	769.633	420.891
ABHD15	443.492	662.459	657.607	494.43	566.063	220.272	349.825	129.218	198.776	171.552	162.827	346.031	357.73	192.491	-1.27726	6.53678e-13	7.59811e-12	564.81	236.525
ABHD16A	1636.48	1196.57	1661.06	1850.15	2157.72	4193.55	3905.33	5773.02	6519.86	4927.89	7905.61	4568.25	2086.28	4280.92	1.44687	4.52351e-30	5.27086e-28	1700.4	4906.75
ABHD16B	15.2054	4.95381	6.59806	4.52913	12.6072	15.5627	5.20572	10.1348	9.93881	10.873	11.8728	3.22389	8.58552	10.0256	0.0734519	0.855113	0.891784	8.77872	9.49143
ABHD17A	27.8766	42.7829	34.6398	28.6845	37.1912	67.0393	137.431	77.2777	84.4799	65.2381	196.75	78.448	37.2039	102.261	1.36611	3.33188e-05	0.00011345	34.235	94.0143
ABHD17B	988.353	1028.59	1045.24	1022.83	934.193	906.228	807.928	591.618	883.312	793.73	761.557	1309.97	911.019	620.583	-0.25424	0.0893097	0.139875	1003.84	842.883
ABHD17C	54.4861	82.4133	70.3793	120.022	118.508	229.849	167.624	181.159	263.378	149.806	167.916	390.091	106.842	63.1611	1.05271	0.00325432	0.0074514	89.1617	191.092
ABHD2	18614	10001.3	14515.2	19062.4	22761	10508.4	11352.6	14343.2	20508.7	14185.7	16862.8	14495.7	20768.4	9290.7	-0.213573	0.292332	0.381624	16990.8	14701.8
ABHD3	5268.05	2551.66	3488.18	4168.31	4686.72	11302.1	10181.4	10131	12526.6	7309.08	14084.6	9148.32	5029.21	7863.06	1.24422	4.02988e-23	1.90397e-21	4032.58	9730.59
ABHD4	1624.45	711.997	1192.6	1214.56	1629.48	2232.65	2475.84	2357.6	2554.27	2549.12	4082.56	2657.56	1680.85	1559.98	0.931844	1.0625e-11	1.02802e-10	1274.62	2461.16
ABHD5	8497.94	2726.39	5668.84	8601.57	7609.07	11828.9	10670.7	12093.3	13873.3	12563.2	24907.5	14060.5	7060.16	4809.27	0.87181	2.72621e-05	9.42633e-05	6620.76	12429.6
ABHD6	93.1333	133.753	109.968	146.442	125.442	120.91	82.2504	81.0782	118.023	190.882	135.689	118.209	375.855	57.1458	0.152093	0.587506	0.669738	121.747	142.227
ABHD8	16.4726	6.75519	12.0964	10.568	6.93395	23.9426	21.864	17.7359	24.847	15.7055	11.8728	11.8209	24.8026	36.0921	0.974278	0.00528215	0.0115222	10.5652	20.9648
ABI1	7969.55	6009.42	7114.91	8405.31	7812.68	10035.5	9748.24	11271.1	13028.5	10636.2	15263.4	9440.62	9255.19	10062.7	0.537766	3.7685e-10	2.89544e-09	7462.37	10971.3
ABI2	1841.76	1759.05	1877.15	1707.48	1586.61	873.906	1030.73	571.348	444.762	681.376	590.249	1426.03	632.467	1125.87	-1.1498	3.52733e-25	2.1404e-23	1754.41	819.638
ABI3	480.872	609.768	636.163	540.476	663.138	822.429	980.758	492.804	356.555	473.58	1034.63	620.061	624.835	237.606	0.0958126	0.770587	0.824085	586.084	627.029
ABI3BP	7.60272	6.75519	7.1479	12.8325	5.04288	27.534	28.1109	10.1348	11.1812	14.4974	28.834	33.3135	13.3553	46.1176	1.50693	0.000147426	0.000445729	7.87624	23.6754
ABL1	838.833	961.939	1012.8	943.569	1016.77	560.257	735.048	796.847	764.046	712.786	586.857	809.196	892.894	813.074	-0.366392	0.000860251	0.00223357	954.783	741.223
ABL2	2070.47	2114.37	2085.54	2184.55	1956.64	1381.49	1192.11	1214.91	1948.01	1313.22	2050.61	2278.22	1822.04	2812.17	-0.232356	0.186009	0.261172	2082.31	1779.2
ABLIM1	13385.2	11569.8	12390.6	8332.84	7740.18	2650.45	5294.22	1978.82	1622.51	1360.33	2191.38	3929.92	2750.23	6436.42	-1.81685	2.53378e-12	2.67951e-11	10683.7	3134.92
ABLIM2	24.0753	21.1663	20.344	9.81311	15.1286	9.57705	6.24687	7.60108	11.1812	1.20811	5.08835	18.2687	3.81579	18.046	-1.07118	0.00505387	0.0110812	18.1055	9.00368
ABLIM3	930.066	573.741	469.562	1053.02	1021.18	2121.32	1877.18	1996.55	592.601	2132.32	2550.96	469.613	1217.24	957.442	0.920276	0.0208171	0.0391734	809.515	1546.14
ABO	55.1197	108.984	77.5272	55.8593	112.834	59.8565	35.3989	69.6766	33.5435	33.8272	39.0107	20.418	107.796	101.258	-0.618093	0.109914	0.167262	82.0649	55.6428
ABR	3984.46	3104.23	3285.29	3901.09	4181.17	4110.95	5105.77	6123.94	7639.22	5309.65	7829.28	6435.96	4492.14	4909.52	0.621811	5.55875e-06	2.19724e-05	3691.25	5772.94
ABRA	10.7705	10.8083	4.94855	3.77427	4.41252	15.5627	13.5349	3.80054	11.1812	6.04056	15.2651	10.7463	13.3553	7.0179	0.625716	0.184453	0.259338	6.94283	10.7227
ABRACL	1512.94	1591.97	1714.95	2395.91	1532.4	1725.07	1699.15	2258.79	1344.22	1640.62	1261.91	883.346	2382.96	2177.55	-0.0742898	0.649827	0.723541	1749.63	1708.18
ABT1	520.152	564.283	623.517	538.966	598.842	307.663	543.477	506.739	407.491	425.256	415.549	415.882	417.829	499.274	-0.379496	0.00641755	0.0137247	569.152	437.684
ABTB1	3094.31	1059.66	1677.56	2620.1	2819.6	10002	11495.3	10747.9	13987.6	8688.75	21550.9	9133.28	5065.46	3850.82	2.15946	1.3549e-16	2.73237e-15	2254.25	10502.4
ABTB2	158.39	113.938	211.688	182.675	258.447	142.459	120.773	321.779	211.2	165.511	259.506	135.403	129.737	329.841	0.100001	0.691072	0.75835	185.028	201.801
ACAA1	2527.27	1782.02	1883.2	2493.29	2384.65	5718.69	4323.87	5781.89	5552.07	3857.5	6599.6	3221.74	3067.89	2907.42	0.982312	1.75819e-14	2.54134e-13	2214.08	4558.96
ACAA2	1187.92	1233.95	1493.91	1531.6	1430.29	651.239	1464.89	1121.16	951.641	1192.41	732.723	756.539	1818.22	841.146	-0.436207	0.00155022	0.00381144	1375.53	1058.89
ACACA	655.101	907.897	957.819	1077.93	815.685	411.813	533.066	364.852	465.882	431.296	234.064	552.36	710.69	760.941	-0.873547	3.60139e-08	2.02911e-07	882.887	496.107
ACACB	776.111	741.72	598.224	588.787	647.379	363.928	564.3	377.52	525.514	442.169	739.508	789.853	340.559	445.135	-0.424244	0.0199152	0.0376442	670.444	509.832
ACAD10	1042.21	988.059	922.629	963.95	932.302	1302.48	1048.43	1247.84	1538.03	1227.44	1112.65	1082.15	1355.56	1063.71	0.32174	0.000135703	0.000413362	969.829	1219.81
ACAD11	49.4177	63.9491	53.3343	39.2525	56.102	22.7455	39.5635	24.0701	17.3929	16.9136	18.6573	21.4926	22.8947	45.1151	-1.0402	1.03209e-05	3.88708e-05	52.4111	25.4273
ACAD8	1353.92	1254.66	1206.35	1457.62	1405.7	1443.74	1636.68	1809.06	1826.26	1330.13	1853.86	2167.53	1287.83	1343.43	0.276136	0.0283261	0.0513847	1335.65	1633.17
ACAD9	447.293	623.729	482.758	451.403	467.096	399.842	465.392	475.068	416.188	445.794	396.892	346.031	536.118	402.025	-0.203595	0.0165978	0.0320531	494.456	431.483
ACADM	885.716	1137.57	1160.71	1037.93	967.602	790.106	811.051	786.712	1018.73	977.363	530.885	747.942	1480.53	797.033	-0.259177	0.115279	0.174198	1037.91	882.261
ACADS	32.3115	27.9214	28.5916	22.6456	32.1483	29.9283	63.5098	46.8733	43.4823	51.9488	28.834	39.7613	47.6973	47.1202	0.61976	0.0119551	0.023909	28.7237	44.3506
ACADSB	1822.75	1946.4	1656.66	1619.92	1426.5	804.472	829.792	700.566	711.867	601.64	798.872	1121.91	1113.26	707.805	-1.03984	3.31563e-16	6.32268e-15	1694.45	821.132
ACADVL	6777.82	5287.96	5448.9	5809.36	6067.84	8839.61	10919.5	10343.8	9382.23	9957.26	8307.59	8005.99	8234.47	6890.58	0.601838	4.68e-06	1.87645e-05	5878.38	8986.79
ACAN	12.6712	11.2586	8.24758	3.01942	6.3036	0	5.20572	3.80054	2.4847	4.83245	0	5.37315	2.86184	15.0384	-0.91707	0.181569	0.256168	8.30009	4.39964
ACAP1	3765.88	3342.47	3060.95	3116.8	3586.75	4613.74	4252.03	6487.52	10558.7	5472.75	10926.4	6775.54	4638.09	5048.88	0.874978	2.3055e-08	1.34156e-07	3374.57	6530.41
ACAP2	19758.8	11891.4	14414.6	18258.4	16734.8	25035.6	18247.1	25596.6	29381.6	24159.8	26759.7	22832.7	20164.5	20335.9	0.537228	1.16839e-06	5.17519e-06	16211.6	23612.6
ACAP3	215.41	235.531	228.733	244.573	240.167	469.275	385.223	450.998	453.458	368.474	464.736	357.852	298.585	382.977	0.779585	3.30287e-06	1.35959e-05	232.883	403.509
ACAT1	589.844	569.688	589.427	637.852	500.505	542.3	652.798	486.469	525.514	618.554	398.588	533.016	678.256	681.739	-0.0248716	0.845536	0.884285	577.463	568.582
ACAT2	276.866	298.579	355.746	296.658	313.289	227.455	242.587	288.841	259.651	324.982	230.672	192.359	275.691	384.982	-0.192634	0.305393	0.395792	308.227	269.691
ACBD3	2040.06	1944.14	2318.12	2232.11	2254.8	1879.5	1584.62	1748.25	1805.14	1989.76	1723.26	2055.77	2361.02	1969.02	-0.182742	0.108247	0.165082	2157.85	1901.81
ACBD4	244.554	197.702	224.884	178.146	150.656	198.724	251.957	174.825	156.536	113.563	139.082	243.941	224.178	182.465	-0.0907487	0.591848	0.6731	199.188	187.252
ACBD5	2493.69	2371.97	2518.81	2506.12	2572.5	1885.48	1728.3	2087.76	1800.17	1797.67	1762.27	1657.08	1884.05	1875.78	-0.449039	1.22117e-08	7.41484e-08	2492.62	1830.95
ACBD6	398.509	416.57	420.077	464.236	354.262	471.67	316.508	530.809	673.354	489.286	980.356	491.106	506.546	317.811	0.293694	0.0996784	0.153793	410.731	530.827
ACBD7	16.4726	24.3187	25.8424	6.03884	17.6501	499.204	58.3041	64.6092	310.588	147.39	456.256	223.523	128.783	29.0742	3.52473	9.94885e-09	6.141e-08	18.0645	213.081
ACCS	959.209	830.888	622.417	1639.54	751.389	610.537	492.461	388.922	472.093	366.058	276.467	1012.3	783.19	1907.87	-0.644114	0.0461956	0.0792872	960.69	701.1
ACCSL	4.43492	1.80138	0.549839	6.79369	8.19467	25.1397	12.4937	36.7386	8.69646	4.83245	37.3146	9.67167	5.72368	7.0179	1.83939	0.00420527	0.00940097	4.3549	16.4032
ACD	89.9655	122.944	105.569	114.738	94.5539	247.806	200.941	168.491	155.294	182.425	217.103	154.747	103.98	112.286	0.682224	0.000683255	0.00181599	105.554	171.453
ACE	50.0512	91.8706	73.1285	40.7622	49.7984	10.7742	20.8229	13.9353	63.3599	19.3298	8.48059	13.9702	27.6645	68.1739	-1.12775	0.0239007	0.0442443	61.1222	27.3901
ACE2	13.3048	2.25173	9.34726	17.3617	17.6501	50.2795	20.8229	29.1375	58.3905	44.7002	113.64	35.4628	27.6645	35.0895	1.92169	1.64652e-09	1.14175e-08	11.9831	46.1319
ACER1	32.9451	27.9214	29.1414	27.9296	13.8679	8.37992	27.0698	7.60108	6.21175	7.24868	13.5689	11.8209	10.4934	19.0486	-1.09884	0.00810126	0.0168862	26.3611	12.3826
ACER2	100.102	82.4133	103.37	89.0729	113.465	53.8709	51.0161	25.3369	26.0894	18.1217	32.2262	73.0748	120.197	69.1765	-1.05634	0.000211954	0.000619329	97.6846	52.1233
ACER3	1918.42	2308.47	1912.34	2663.13	2333.59	2141.67	1737.67	3250.73	2967.98	2644.56	2167.64	1528.12	2907.63	2612.66	0.0923273	0.553258	0.63968	2227.19	2439.85
ACIN1	10883.3	8195.85	9398.94	10475.1	9619.92	13366	11919	15292.1	16746.9	14104.7	15731.5	12358.2	12139.9	12892.9	0.496148	2.12344e-17	4.79554e-16	9714.62	13839
ACKR1	0	2.70208	0	0	0	2.39426	0	5.06739	1.24235	1.20811	1.69612	2.14926	0	1.00256	1.37715	0.249986	0.335357	0.540415	1.64001
ACKR2	9.50339	14.4111	10.9968	10.568	6.3036	8.37992	4.16458	7.60108	1.24235	1.20811	3.39224	7.52241	9.53947	1.00256	-1.08198	0.0156429	0.0304724	10.3566	4.89475
ACKR3	54.4861	84.665	54.434	54.3496	33.4091	17.957	60.3864	13.9353	9.93881	66.4462	42.403	139.702	66.7763	28.0716	-0.285638	0.466274	0.558876	56.2688	49.5129
ACKR4	122.277	83.314	129.212	113.228	101.488	113.727	73.9213	48.1402	57.1481	80.9435	62.7564	95.6421	38.1579	64.1637	-0.655064	0.000345758	0.000970587	109.904	70.5112
ACLY	3186.17	3562.69	3757.6	3742.57	3669.95	2888.68	3253.58	4085.58	4082.37	3518.02	3039.44	2716.66	4356.68	3279.36	-0.0693205	0.321348	0.412668	3583.8	3468.93
ACMSD	29.1437	26.5704	23.6431	16.6068	13.8679	28.7311	14.576	11.4016	9.93881	15.7055	23.7457	23.6419	12.4013	26.0665	-0.279692	0.360042	0.452346	21.9664	18.4676
ACO1	610.118	470.161	532.794	549.534	457.011	702.716	670.497	1337.79	1641.15	1472.69	778.518	463.165	728.815	2067.27	1.0354	0.00036409	0.00101723	523.924	1095.85
ACO2	857.84	1114.61	1084.83	1046.23	1016.77	679.97	748.583	970.405	950.398	1035.35	637.74	764.062	1180.03	964.46	-0.230442	0.0512374	0.086726	1024.06	881.223
ACOT1	32.9451	36.478	63.2314	43.7816	59.2538	15.5627	47.8926	26.6038	23.6047	7.24868	16.9612	4.29852	37.2039	2.00511	-1.36819	0.00462754	0.0102353	47.138	20.1535
ACOT11	11.4041	11.709	13.1961	3.01942	16.3893	3.59139	14.576	2.53369	6.21175	1.20811	8.48059	5.37315	4.76973	4.01023	-0.966543	0.106382	0.162617	11.1436	5.63941
ACOT12	1.90068	0	3.29903	1.50971	0	4.78852	1.04114	11.4016	0	6.04056	3.39224	4.29852	0.953947	1.00256	1.34814	0.127129	0.189512	1.34188	3.65768
ACOT13	790.049	591.755	711.491	702.77	798.666	1273.75	963.059	1292.18	1229.93	1060.72	1495.98	996.182	1121.84	1062.71	0.68433	1.35429e-14	2.00328e-13	718.946	1166.26
ACOT2	197.671	241.385	240.829	160.029	217.474	96.9676	156.172	70.9434	79.5105	113.563	78.0214	162.269	126.875	112.286	-0.943436	1.0252e-08	6.30967e-08	211.478	110.734
ACOT4	34.8458	38.7297	37.9389	28.6845	46.6466	4.78852	31.2343	2.53369	2.4847	15.7055	16.9612	16.1194	11.4474	6.01534	-1.68313	0.000215996	0.000630073	37.3691	11.9211
ACOT7	23.4417	38.2794	30.791	29.4393	35.9305	27.534	92.6619	44.3396	24.847	39.8677	57.668	25.7911	29.5724	28.0716	0.393087	0.296006	0.385494	31.5764	41.1504
ACOT8	204.006	216.616	181.447	150.216	192.89	232.243	284.232	348.383	366.494	332.231	361.273	235.344	252.796	213.545	0.579522	7.00742e-05	0.000224628	189.035	291.838
ACOT9	1915.25	1647.37	1896.94	2060	2084.6	2357.15	2224.93	3768.87	3293.47	3333.18	2946.16	1881.68	2820.82	4471.41	0.635726	0.000457461	0.00125557	1920.83	3010.85
ACOX1	8738.05	2747.56	4928.2	5702.17	6910	10847.2	13672.3	13975.9	14480.8	15245.2	23352.2	12121.8	9613.88	7861.05	1.20633	9.15466e-11	7.73807e-10	5805.2	13463.4
ACOX2	4.43492	5.8545	13.746	10.568	6.3036	7.18279	10.4114	25.3369	22.3623	21.746	15.2651	5.37315	24.8026	10.0256	0.711793	0.0600391	0.0993399	8.18139	15.834
ACOX3	151.421	198.152	198.492	204.566	209.279	167.598	171.789	178.625	206.23	205.379	191.661	164.418	222.27	228.583	0.000487008	0.996733	0.997588	192.382	192.95
ACOXL	32.9451	4.50346	5.49839	14.3422	12.6072	106.545	37.4812	69.6766	57.1481	148.598	42.403	19.3433	26.7105	63.1611	2.23501	4.93877e-06	1.97063e-05	13.9793	63.4518
ACP1	2196.55	2687.66	2597.44	2383.83	2489.29	1243.82	1592.95	1169.3	858.464	1342.21	797.176	1343.29	1679.9	1552.96	-0.955422	1.47473e-23	7.39995e-22	2470.95	1286.67
ACP2	201.472	309.388	306.81	283.071	246.471	225.061	307.138	415.526	327.981	442.169	200.142	208.478	583.816	390.997	0.294594	0.0236514	0.0438254	269.442	344.59
ACP5	315.513	323.348	243.578	364.595	241.428	298.086	204.064	190.027	291.952	233.166	173.004	319.165	248.98	139.355	-0.349808	0.100677	0.155119	297.692	233.089
ACP6	341.489	246.339	227.083	314.775	251.513	275.34	382.1	305.31	345.374	300.82	471.521	311.643	401.612	164.419	0.243539	0.229366	0.311546	276.24	328.682
ACPP	2432.87	1257.37	1607.73	1813.16	1638.3	2185.96	2625.77	2099.17	1541.76	2102.12	2540.79	1090.75	2470.72	1461.73	0.175076	0.497953	0.588123	1749.89	2013.19
ACPT	8.86983	6.30484	8.24758	3.77427	11.9768	4.78852	6.24687	1.26685	3.72705	7.24868	5.08835	2.14926	3.81579	15.0384	-0.474954	0.418136	0.511737	7.83467	5.48553
ACRBP	1422.34	1363.2	1306.42	1499.9	2662.64	2213.5	3382.68	2911.21	1308.2	3216	3678.88	769.435	2577.56	2243.72	0.567645	0.0552179	0.0925806	1650.9	2477.91
ACRC	325.65	270.658	265.022	215.889	240.797	488.429	575.753	508.006	515.576	448.21	798.872	739.345	464.572	547.396	1.08364	3.34712e-16	6.37631e-15	263.603	565.129
ACRV1	0	0.450346	1.09968	0	1.26072	1.19713	5.20572	8.86793	2.4847	2.41623	0	1.07463	0.953947	3.00767	2.21952	0.0460848	0.0791329	0.562148	2.80088
ACSBG1	79.8285	36.0277	28.5916	95.8666	69.9699	93.3762	85.3738	39.2723	18.6353	61.6137	130.601	25.7911	18.125	31.0793	-0.194674	0.629962	0.706226	62.0569	55.9853
ACSBG2	15.2054	20.2656	9.34726	3.77427	10.0858	14.3656	16.6583	8.86793	13.6659	19.3298	25.4418	13.9702	20.9868	19.0486	0.529279	0.103849	0.159244	11.7357	16.9261
ACSF2	361.129	380.542	379.938	269.483	365.609	345.971	212.393	254.636	291.952	351.561	125.513	257.911	248.026	206.527	-0.460166	0.0326804	0.0584296	351.34	254.943
ACSF3	218.578	290.473	337.601	259.67	265.381	237.032	270.698	267.305	245.985	302.028	215.407	237.493	231.809	326.834	-0.0733761	0.594949	0.67587	274.341	259.399
ACSL1	59891.7	10047.2	30020.1	58914.2	54136.5	183208	96259	193526	280996	197386	307671	211912	142707	165671	2.28366	4.15733e-18	1.02546e-16	42601.9	197704
ACSL3	1772.07	1478.49	1846.36	2275.13	1958.53	3160.43	1824.08	3713.13	4560.67	3940.86	4001.14	4392.01	3771.91	4362.13	1.00703	7.0599e-07	3.23178e-06	1866.11	3747.37
ACSL4	6750.58	4308.46	5302.09	6960.52	6875.33	8174.01	7712.8	13570.5	19589.4	12992	16857.7	13191.1	15022.8	7831.98	1.05949	8.27881e-08	4.39585e-07	6039.4	12771.4
ACSL5	3257.13	3791.46	3680.62	3495.73	4573.26	1899.85	3053.68	3908.22	3031.34	2962.29	2303.33	2564.07	3252.96	3047.77	-0.391854	0.00315938	0.0072594	3759.64	2891.5
ACSL6	870.511	736.766	780.221	575.199	533.915	154.43	331.084	111.483	54.6634	80.9435	303.605	148.299	271.875	360.921	-1.79295	7.72372e-06	2.97619e-05	699.322	201.923
ACSM1	53.8526	45.4849	44.5369	55.8593	40.9734	9.57705	20.8229	12.6685	28.5741	4.83245	8.48059	27.9404	10.4934	39.0997	-1.43852	2.53799e-05	8.83505e-05	48.1414	18.0543
ACSM3	121.01	135.554	158.903	111.719	131.745	35.9139	56.2218	34.2049	21.12	41.0758	30.5301	39.7613	56.2829	64.1637	-1.65858	1.27671e-25	8.21988e-24	131.786	42.1416
ACSM4	1.26712	2.70208	5.49839	1.50971	8.82503	17.957	18.7406	6.33424	48.4517	14.4974	0	8.59704	135.46	20.0511	2.31388	0.00132479	0.00330425	3.96046	30.0099
ACSM6	0	4.50346	5.49839	1.50971	0	0	0	0	2.4847	0	0	2.14926	0.953947	1.00256	-1.39711	0.174394	0.247758	2.30231	0.732274
ACSS1	2034.36	2498.97	2241.69	1932.43	2019.04	1884.28	2106.24	1360.59	1150.42	1646.66	1002.41	1543.17	1339.34	1452.71	-0.508807	0.000216818	0.000632181	2145.3	1498.42
ACSS2	1778.4	1178.1	1241.54	1835.05	1560.77	2662.42	2399.84	3813.21	4088.58	2412.6	2991.95	1885.98	2422.07	2265.78	0.827677	2.20691e-16	4.33014e-15	1518.77	2771.38
ACSS3	10.137	7.20553	10.4469	9.81311	7.56431	41.8996	20.8229	65.876	21.12	66.4462	98.3749	73.0748	6.67763	38.0972	2.14191	4.67753e-07	2.19142e-06	9.03337	48.0432
ACTA2	162.191	157.621	130.312	201.546	137.418	98.1647	204.064	315.445	387.613	141.349	156.043	162.269	152.632	223.57	0.338864	0.171572	0.244572	157.818	204.572
ACTA2-AS1	47.517	54.9422	55.5337	43.7816	57.9931	31.1254	18.7406	20.2696	34.7858	32.619	8.48059	44.0598	12.4013	72.1841	-0.794199	0.0102449	0.0208478	51.9535	30.5185
ACTB	77291.7	55462.4	76570.5	93288.7	101066	170592	186490	242388	212717	159843	284787	114790	113999	101591	1.05342	4.73385e-21	1.75949e-19	80735.8	176355
ACTG1	15270.1	15019	16740.9	20653.6	18806.8	30982.9	31622.7	30990.9	31004.1	26063.8	37837	18798.5	23046.4	13863.4	0.60581	1.10246e-05	4.12512e-05	17298.1	27134.4
ACTG1P17	70.3251	62.5981	59.3826	39.2525	49.7984	81.4049	84.3327	20.2696	26.0894	47.1164	39.0107	65.5524	18.125	85.2174	-0.172328	0.507484	0.596879	56.2713	51.902
ACTG1P20	470.735	406.212	561.385	551.044	525.089	292.1	450.816	456.065	525.514	607.681	641.133	618.987	433.092	667.703	0.0467478	0.763729	0.818456	502.893	521.454
ACTG1P4	67.7909	66.2008	38.4887	38.4976	49.168	55.068	44.7692	40.5391	59.6328	44.7002	25.4418	59.1046	30.5263	41.1048	-0.221831	0.28637	0.375364	52.0292	44.543
ACTG2	1.26712	1.80138	1.09968	0	2.52144	2.39426	0	0	0	1.20811	0	1.07463	0	0	-1.23699	0.345961	0.438235	1.33792	0.519667
ACTL10	4.43492	2.25173	1.09968	0	1.26072	4.78852	1.04114	0	3.72705	4.83245	0	4.29852	4.76973	7.0179	0.812483	0.317125	0.408405	1.80941	3.38615
ACTL6A	895.22	1065.07	869.845	851.476	767.148	572.229	666.332	504.205	432.338	589.559	424.03	544.837	1068.42	491.253	-0.624503	1.03382e-06	4.61355e-06	889.751	588.134
ACTN1	9295.59	3042.99	5029.37	9003.91	8775.87	12714.7	14654.1	21146.2	27037.3	15146.1	24013.6	11227.7	11495.1	13423.2	1.2399	4.9749e-16	9.19147e-15	7029.54	16762
ACTN1-AS1	0	0.450346	4.39871	3.77427	0	4.78852	7.28801	3.80054	0	2.41623	3.39224	4.29852	5.72368	8.02046	1.36288	0.0701411	0.113726	1.72467	4.41424
ACTN2	1.26712	0.900692	5.49839	0	0	1.19713	1.04114	1.26685	0	6.04056	0	0	0.953947	4.01023	0.194779	0.873895	0.906394	1.53324	1.61221
ACTN3	5.06848	4.50346	1.09968	5.28398	6.3036	2.39426	5.20572	0	1.24235	3.62434	0	7.52241	1.90789	0	-1.15322	0.140097	0.205949	4.45184	2.433
ACTN4	3648.67	2495.37	3045.56	3877.69	4198.82	4223.48	4564.38	5735.02	6304.93	5092.19	6341.79	4350.1	4723.95	4073.39	0.531373	1.56836e-06	6.81798e-06	3453.22	5045.47
ACTR10	1939.96	1581.16	1596.73	1723.33	1976.81	2559.47	2582.04	3004.96	2461.1	2452.47	3142.91	1989.14	2222.7	2027.17	0.477389	1.01853e-10	8.55967e-10	1763.6	2493.55
ACTR1A	2595.06	2087.35	2546.3	3240.59	3084.35	3439.36	3609.65	4322.48	4428.98	3601.38	5212.17	3224.96	4263.19	3422.73	0.528936	4.75799e-08	2.61634e-07	2710.73	3947.21
ACTR1B	967.446	969.144	953.42	794.862	987.773	654.831	950.565	711.968	750.38	518.28	727.635	845.734	701.151	705.8	-0.352123	0.0312353	0.0561154	934.529	729.594
ACTR2	55727.9	39239.5	46100.1	59210.1	53142.5	52655.8	47054.5	60698.4	64863.1	51971.8	84061.3	47361.1	66239.2	37689.1	0.145851	0.312639	0.403392	50684	56954.9
ACTR3	26364.3	15496	20693.7	27527.3	24926.9	30196.4	28932.4	34915.6	36651.8	31966.7	50664.7	26147.9	24295.1	30914.9	0.487859	3.40714e-09	2.25713e-08	23001.6	32742.8
ACTR3B	144.452	176.085	136.91	230.986	246.471	166.401	203.023	207.763	80.7528	167.928	195.054	87.045	203.191	111.284	-0.258229	0.279226	0.367624	186.981	158.049
ACTR3C	48.1505	45.9353	58.2829	45.2913	63.6663	38.3082	41.6458	51.9407	44.7246	47.1164	35.6185	60.1793	20.9868	43.11	-0.312617	0.0859883	0.135309	52.2653	42.6256
ACTR5	633.56	648.048	645.51	517.83	702.221	380.688	323.796	259.704	224.866	303.236	254.418	610.39	262.335	349.892	-0.962561	4.41592e-21	1.65102e-19	629.434	329.925
ACTR6	904.09	950.23	1041.39	952.627	993.447	456.107	588.247	416.793	534.211	451.834	395.196	580.3	968.256	585.493	-0.840154	2.08011e-11	1.92251e-10	968.357	552.937
ACTR8	917.394	934.017	894.587	788.823	782.907	605.748	566.383	641.025	677.081	784.065	620.779	845.734	1028.35	545.391	-0.303436	0.0480692	0.0820801	863.546	701.618
ACTRT3	3.1678	0.900692	3.29903	0	4.41252	4.78852	2.08229	1.26685	7.45411	8.45679	1.69612	3.22389	8.58552	2.00511	0.895649	0.219977	0.301292	2.35601	4.39547
ACVR1	768.508	690.831	803.314	722.396	834.596	665.605	739.213	710.701	463.397	645.132	615.691	297.672	688.75	731.867	-0.326468	0.0786975	0.125479	763.929	617.559
ACVR1B	1428.04	1251.96	1405.39	2047.17	1517.28	2881.49	1630.43	2009.22	3102.15	2486.3	4191.11	2531.83	5083.58	1456.72	0.869786	0.00112009	0.00283993	1529.97	2819.2
ACVR1C	902.822	544.018	482.758	397.809	196.672	149.641	191.571	65.876	40.9976	71.2786	45.7952	145.075	73.4539	335.857	-2.11668	1.20325e-08	7.31669e-08	504.816	124.394
ACVR2A	912.959	984.456	731.285	769.952	621.534	521.949	527.86	495.337	221.138	223.501	332.439	470.688	435.954	767.959	-0.859207	0.000409345	0.00113169	804.037	444.092
ACVR2B	1074.52	905.646	763.726	762.403	483.486	179.57	336.29	155.822	144.113	164.303	235.76	233.195	289.046	527.345	-1.67635	4.48086e-09	2.90659e-08	797.956	251.716
ACVR2B-AS1	14.5719	13.9607	1.64952	3.77427	9.45539	4.78852	8.32916	3.80054	1.24235	3.62434	3.39224	4.29852	0.953947	2.00511	-1.2871	0.0306513	0.0551549	8.68236	3.60386
ACVRL1	16.4726	16.2125	24.7427	27.9296	32.7787	20.3512	33.3166	63.3424	119.266	59.1975	32.2262	12.8956	198.421	25.0639	0.969622	0.000999778	0.002555	23.6272	62.6756
ACY3	2.53424	8.55657	3.29903	0.754855	5.04288	9.57705	8.32916	0	0	12.0811	3.39224	7.52241	0	2.00511	0.302944	0.697531	0.763497	4.03751	4.76745
ACYP1	414.982	338.21	333.752	296.658	308.876	234.638	252.998	152.022	134.174	211.42	144.17	219.224	190.789	291.744	-0.742517	3.0311e-07	1.46525e-06	338.495	203.464
ACYP2	78.5614	87.3671	95.6719	81.5243	56.7324	84.9963	98.9087	81.0782	52.1787	54.3651	54.2758	42.9852	85.8552	104.266	-0.131945	0.480879	0.572526	79.9714	73.2121
ADA	409.913	632.286	538.842	483.862	593.799	249.003	609.069	145.687	122.993	450.626	212.015	314.867	281.414	397.013	-0.811731	0.00484933	0.0106811	531.74	309.187
ADAD2	1.26712	4.05311	1.09968	0.754855	0	2.39426	0	0	0	4.83245	0	4.29852	0	3.00767	0.395167	0.725546	0.786816	1.43495	1.61477
ADAL	284.468	297.679	231.482	258.915	230.081	152.036	135.349	115.283	89.4493	126.852	132.297	85.9704	165.033	93.2378	-1.10667	1.43711e-12	1.59155e-11	260.525	121.723
ADAM10	10643.8	8679.07	12699.1	11841.4	12113.6	9981.68	8172.98	10487	11997.4	9035.47	10958.6	8081.22	14314.9	7925.22	-0.168492	0.222397	0.304125	11195.4	10106.1
ADAM11	10.137	10.358	8.24758	6.79369	6.93395	5.98565	17.6995	2.53369	12.4235	7.24868	16.9612	4.29852	10.4934	13.0332	0.256107	0.578741	0.661653	8.49403	10.0753
ADAM12	55.1197	257.598	109.418	71.7112	40.9734	47.8852	22.9052	26.6038	9.93881	14.4974	28.834	35.4628	32.4342	24.0614	-1.87913	1.07884e-06	4.80433e-06	106.964	26.9581
ADAM15	733.662	1007.87	738.983	1117.94	732.478	1148.05	1073.42	1223.77	954.126	726.076	1265.3	695.286	1064.6	890.271	0.190834	0.283015	0.371684	866.187	1004.55
ADAM17	4040.21	3146.57	3689.42	4129.06	3579.81	6817.66	9188.1	6205.02	10512.8	6174.66	12943.1	7062.47	7977.86	6516.62	1.11813	1.87212e-12	2.03184e-11	3717.01	8155.36
ADAM19	6755.65	3804.52	4549.36	5665.94	6285.31	11681.6	9048.59	7062.67	11873.1	12938.9	18124.7	14656.9	13181.6	5483.99	1.09457	1.47285e-06	6.43077e-06	5412.16	11561.3
ADAM1A	474.536	505.738	321.106	341.949	301.942	240.623	371.689	160.89	260.894	210.212	215.407	346.031	482.697	186.476	-0.514338	0.00965973	0.0197532	389.054	274.991
ADAM20	10.7705	6.30484	11.5466	8.3034	10.0858	33.5197	20.8229	15.2022	12.4235	16.9136	22.0495	4.29852	5.72368	28.0716	0.894697	0.0341947	0.0608482	9.40222	17.6695
ADAM20P1	32.3115	23.418	31.8906	27.1748	37.8216	94.5733	62.4687	58.275	67.087	59.1975	81.4137	55.8808	32.4342	78.1995	1.08149	4.08684e-07	1.93136e-06	30.5233	65.5033
ADAM21	11.4041	11.709	8.79742	3.77427	12.6072	7.18279	7.28801	0	6.21175	8.45679	3.39224	13.9702	11.4474	11.0281	-0.431819	0.246382	0.331177	9.65839	7.66414
ADAM22	321.848	325.6	350.247	307.226	396.496	153.233	192.612	72.2103	91.934	95.4409	140.778	221.374	129.737	165.422	-1.3227	6.4673e-15	9.97024e-14	340.284	140.304
ADAM23	102.003	379.642	75.3279	33.9685	61.1449	56.2652	38.5223	15.2022	11.1812	49.5326	33.9224	17.1941	53.421	93.2378	-1.38575	0.0129744	0.0257576	130.417	40.9421
ADAM28	4307.57	2901.58	3061.5	2238.14	2592.67	7717.9	2298.85	1193.37	3575.49	2553.95	2567.92	4640.25	1748.58	1728.41	0.0343813	0.92074	0.942729	3020.29	3113.86
ADAM30	0	0.450346	0.549839	1.50971	0	4.78852	0	1.26685	0	0	1.69612	0	0.953947	2.00511	1.24902	0.327866	0.419423	0.501979	1.19006
ADAM32	1.26712	2.70208	0.549839	2.26456	5.04288	10.7742	4.16458	8.86793	7.45411	7.24868	25.4418	3.22389	1.90789	12.0307	1.66435	0.00292018	0.0067539	2.36529	9.01263
ADAM33	3.1678	2.70208	1.64952	3.77427	1.89108	0	0	0	1.24235	0	0	0	0	2.00511	-2.68801	0.0232423	0.0431812	2.63695	0.360829
ADAM8	2249.77	984.006	1422.98	1959.6	2444.53	6075.44	5804.38	9047.82	9959.93	4852.99	11269	4640.25	1927.93	5733.62	1.76647	2.43996e-17	5.4778e-16	1812.18	6590.15
ADAM9	1715.05	1544.24	2129.52	2576.32	2311.53	3322.04	2187.44	4292.08	7059.04	3516.82	3901.07	2513.56	5441.31	3693.42	0.913788	4.48272e-05	0.000148951	2055.33	3991.86
ADAMDEC1	20.2739	19.8152	29.6913	49.8204	25.2144	26.3369	17.6995	64.6092	77.0258	22.9541	13.5689	16.1194	80.1315	23.0588	0.185886	0.57421	0.657977	28.963	37.9449
ADAMTS1	93.1333	263.903	164.952	93.602	87.62	83.7992	132.225	22.8032	36.0282	80.9435	117.032	159.045	425.46	50.1279	-0.214454	0.61438	0.692887	140.642	123.052
ADAMTS10	260.393	357.124	440.971	160.029	312.658	95.7705	205.105	34.2049	24.847	78.5273	178.092	309.493	99.2105	228.583	-1.30643	0.000597031	0.0016042	306.235	139.315
ADAMTS13	20.2739	20.2656	17.5948	10.568	23.3233	9.57705	15.6172	16.469	14.9082	19.3298	8.48059	13.9702	12.4013	14.0358	-0.409007	0.203917	0.282535	18.4051	13.8655
ADAMTS14	8.23628	18.0138	11.5466	2.26456	11.9768	2.39426	30.1932	3.80054	4.9694	9.6649	6.78447	3.22389	6.67763	4.01023	-0.358324	0.549903	0.636344	10.4076	7.96872
ADAMTS15	0	3.15242	2.74919	0	0.63036	1.19713	0	0	0	0	1.69612	2.14926	0	2.00511	-0.997745	0.464163	0.556907	1.30639	0.783069
ADAMTS16	2.53424	8.55657	3.84887	1.50971	1.26072	1.19713	4.16458	0	2.4847	2.41623	0	9.67167	2.86184	4.01023	-0.445262	0.467138	0.559628	3.54202	2.97849
ADAMTS17	67.7909	64.8498	55.5337	24.1554	21.4322	29.9283	58.3041	45.6065	24.847	15.7055	45.7952	45.1345	5.72368	74.1892	-0.317363	0.457153	0.549979	46.7524	38.3593
ADAMTS2	1.90068	7.20553	8.79742	8.3034	4.41252	2092.58	1482.59	1659.57	2102.06	2436.76	2243.96	1820.42	4336.64	309.79	8.37262	1.84154e-31	2.64973e-29	6.12391	2053.82
ADAMTS3	1.26712	0.900692	0	3.77427	0.63036	9.57705	0	5.06739	24.847	15.7055	66.1486	3.22389	9.53947	0	2.99593	0.00117255	0.00296028	1.31449	14.901
ADAMTS4	22.8081	23.418	28.5916	15.852	18.2804	10.7742	8.32916	3.80054	9.93881	0	11.8728	6.44778	14.3092	9.02302	-1.40809	0.000590555	0.00158828	21.79	8.27728
ADAMTS5	62.7224	62.5981	69.8295	65.6724	74.3824	53.8709	2.08229	11.4016	8.69646	16.9136	10.1767	0	20.9868	2.00511	-2.3794	0.000552731	0.00149374	67.041	14.0148
ADAMTS6	63.356	121.593	63.7813	67.9369	61.7752	27.534	43.7281	34.2049	73.2987	49.5326	30.5301	148.299	82.0394	82.2097	-0.263507	0.460454	0.553299	75.6886	63.4863
ADAMTS7P1	3.80136	7.65588	2.74919	3.77427	10.7161	0	1.04114	1.26685	0	2.41623	6.78447	5.37315	0	1.00256	-1.86376	0.0193119	0.0366132	5.73936	1.98716
ADAMTS8	6.3356	5.8545	6.59806	6.79369	6.93395	7.18279	4.16458	1.26685	1.24235	0	0	2.14926	3.81579	0	-1.58571	0.00488122	0.0107401	6.50316	2.2024
ADAMTSL4	2174.38	890.334	1707.8	1872.8	1977.44	4935.77	6140.67	7750.57	10189.8	8437.46	8378.82	5511.78	3756.64	6386.29	1.96225	5.03983e-20	1.60696e-18	1724.55	6831.97
ADAMTSL4-AS1	238.218	69.8036	164.952	193.998	180.283	596.171	500.79	582.75	683.293	728.492	703.889	581.375	337.697	638.629	1.82476	4.27046e-17	9.23792e-16	169.451	594.787
ADAMTSL5	43.7156	21.6166	28.5916	12.8325	40.9734	15.5627	19.7817	16.469	6.21175	10.873	11.8728	30.0896	7.63158	47.1202	-0.762739	0.0655045	0.107049	29.5459	18.4014
ADAP1	299.674	244.538	275.469	286.845	336.612	515.963	739.213	985.607	1074.63	639.092	1026.15	494.33	434.046	472.204	1.2099	4.33623e-10	3.30225e-09	288.628	709.027
ADAP2	745.066	780.449	892.388	906.581	806.86	979.253	673.62	1702.64	1241.11	1222.61	695.408	389.016	1895.49	1444.68	0.336596	0.127219	0.189601	826.269	1138.2
ADAR	36439.8	22405.6	32926	38183.6	37701.8	43170.9	44709.9	81185.9	111738	77055.8	56993	40330.9	59968.9	79096.8	0.942449	5.15417e-08	2.81788e-07	33531.4	66027.8
ADARB1	1519.28	1305.1	1181.6	1210.79	1212.81	991.224	1068.21	813.316	940.46	492.91	781.91	848.958	860.46	1906.86	-0.415687	0.0531582	0.0895382	1285.92	967.146
ADARB2	3.80136	59.4457	0	298.168	0.63036	2.39426	307.138	666.362	1.24235	317.734	703.889	341.732	1.90789	668.706	1.95021	0.148334	0.216234	72.409	334.567
ADAT1	1418.54	1614.49	1263.53	1490.08	1439.74	993.619	1083.83	874.124	977.73	920.582	1911.53	1975.17	1360.33	858.189	-0.265084	0.163412	0.234832	1445.28	1217.23
ADAT2	1552.85	1672.58	1600.03	1529.34	1497.1	926.579	973.47	444.663	488.244	484.453	581.769	1040.24	865.23	1032.63	-1.08651	1.37368e-15	2.33993e-14	1570.38	759.698
ADAT3	7.60272	5.40415	13.746	5.28398	16.3893	5.98565	5.20572	22.8032	16.1506	10.873	16.9612	17.1941	5.72368	12.0307	0.284774	0.468404	0.560862	9.68523	12.5475
ADCK1	139.383	167.529	130.312	172.107	327.787	392.659	415.417	177.359	84.4799	122.019	96.6787	135.403	171.71	248.634	0.0663512	0.868767	0.902456	187.423	204.929
ADCK2	196.403	251.293	232.582	196.262	213.692	113.727	181.159	125.418	144.113	101.481	96.6787	153.672	149.77	169.432	-0.658756	0.000804734	0.00210325	218.046	137.272
ADCK3	1086.55	918.255	779.121	822.792	968.863	1322.83	1049.47	1494.88	981.457	953.201	1389.12	1105.79	861.414	671.713	0.229378	0.151429	0.22002	915.117	1092.21
ADCK4	238.218	240.485	230.932	216.643	266.012	433.361	534.107	629.623	807.528	529.153	826.01	638.33	573.322	338.864	1.27576	1.10734e-12	1.24228e-11	238.458	590.033
ADCK5	51.3183	44.1339	52.2347	24.9102	32.1483	32.3225	39.5635	35.4717	33.5435	25.3704	18.6573	32.2389	22.8947	55.1406	-0.308511	0.31497	0.405912	40.9491	32.8004
ADCY1	6.3356	2.25173	8.79742	1.50971	21.4322	3.59139	4.16458	0	3.72705	0	1.69612	7.52241	2.86184	5.01279	-1.46138	0.0498938	0.0847842	8.06534	3.17513
ADCY10	32.9451	25.2194	17.045	13.5874	19.5411	69.4336	81.2093	35.4717	49.694	86.9841	71.237	81.6719	29.5724	43.11	1.46128	2.78617e-07	1.35542e-06	21.6676	60.9315
ADCY10P1	1328.57	853.405	986.41	985.086	886.916	3243.03	2856.9	4596.12	3771.78	2831.82	3393.93	2867.11	1296.41	2392.1	1.52371	4.53707e-19	1.28233e-17	1008.08	3027.69
ADCY3	274.331	292.274	243.578	267.974	236.385	199.921	352.948	755.041	713.109	332.231	305.301	194.508	217.5	275.703	0.329513	0.211043	0.290818	262.909	371.807
ADCY4	397.242	185.543	293.614	320.058	474.03	1520.36	1019.28	2148.57	2144.3	1723.98	1864.03	986.51	914.835	1177	2.11397	3.01315e-37	1.04052e-34	334.097	1499.87
ADCY5	13.9383	28.3718	10.9968	9.81311	10.7161	20.3512	18.7406	6.33424	7.45411	8.45679	8.48059	26.8657	36.25	12.0307	0.0463525	0.871182	0.90442	14.7672	16.1071
ADCY6	36.1129	23.8683	16.4952	11.3228	54.8413	82.602	31.2343	17.7359	8.69646	47.1164	61.0603	10.7463	72.5	20.0511	0.443544	0.361546	0.453917	28.5281	39.0825
ADCY7	12209.3	11440.1	11572.5	11335.7	12120.6	14067.5	14185.6	16529.8	19514.8	16945	15855.3	16446.1	19665.6	15749.2	0.490041	1.05155e-09	7.52244e-09	11735.6	16551
ADCY9	335.153	621.477	545.44	421.209	807.491	162.81	195.735	182.426	223.623	172.76	137.386	146.15	227.993	229.586	-1.55202	1.60607e-09	1.11614e-08	546.154	186.496
ADD1	9191.05	7600.49	7950.12	8572.89	8517.42	9991.25	10215.7	9717.98	13355.3	9544.09	12369.8	10315.4	8471.05	7336.71	0.259532	0.0079671	0.0166486	8366.39	10146.4
ADD2	143.184	165.277	139.109	112.473	73.1217	57.4623	36.4401	10.1348	55.9058	13.2892	13.5689	10.7463	36.25	120.307	-1.70753	0.000944371	0.00242745	126.633	39.3449
ADD3	24801.3	17246.4	21572.4	19356	17821.5	18845.2	14990.4	15598.7	17953.2	16696.1	25954	22755.3	29026.7	12006.6	-0.0582852	0.768974	0.822777	20159.5	19314
ADD3-AS1	24.7088	30.6235	17.5948	30.9491	17.6501	98.1647	43.7281	89.9461	78.2681	65.2381	100.071	36.5374	43.8816	15.0384	1.23071	0.000143465	0.000435067	24.3053	63.4304
ADGB	12.0376	4.50346	3.29903	3.77427	3.1518	52.6738	1.04114	38.0054	37.2705	26.5785	66.1486	19.3433	42.9276	7.0179	2.51577	7.80412e-06	3.00474e-05	5.35324	32.3341
ADGRA2	155.222	100.427	109.968	164.558	85.0985	37.1111	98.9087	30.4043	86.9646	91.8166	62.7564	45.1345	259.474	79.202	-0.69358	0.0338302	0.0602925	123.055	87.9746
ADGRA3	177.397	109.434	175.948	55.1044	73.7521	13.1684	67.6744	13.9353	24.847	24.1623	42.403	41.9106	32.4342	78.1995	-1.66445	4.63612e-06	1.86082e-05	118.327	37.6372
ADGRB1	22.1746	20.2656	16.4952	12.8325	19.5411	19.1541	6.24687	16.469	6.21175	14.4974	11.8728	15.0448	1.90789	8.02046	-0.826769	0.0209881	0.039472	18.2618	11.0472
ADGRB2	18.3732	29.2725	15.9453	12.0777	12.6072	4.78852	8.32916	2.53369	1.24235	1.20811	16.9612	11.8209	11.4474	17.0435	-1.12302	0.0274158	0.0499385	17.6552	8.37498
ADGRB3	1.90068	24.3187	17.5948	8.3034	1.26072	38.3082	0	5.06739	3.72705	3.62434	13.5689	15.0448	30.5263	0	0.51486	0.568483	0.653149	10.6757	12.2074
ADGRD1	107.705	92.7713	68.18	110.964	67.4485	16.7598	34.3578	26.6038	11.1812	25.3704	10.1767	8.59704	66.7763	22.0563	-2.1085	1.37175e-08	8.27891e-08	89.4137	24.6532
ADGRE1	3194.41	3429.38	2658.47	5851.64	5653.69	709.899	974.511	3216.52	7040.4	1092.13	4934.01	430.927	3189.04	3036.75	-0.829955	0.0594676	0.0985488	4157.52	2736.02
ADGRE2	8430.14	3593.31	7517.94	5567.06	8524.35	11391.9	8759.15	15339	29927	10658	34058.1	14282.9	9291.44	8944.82	1.10521	2.13118e-07	1.05913e-06	6726.56	15850.2
ADGRE3	9418.5	2334.14	4906.76	7402.11	8378.11	7155.25	6082.37	7854.45	4775.6	7544.66	15680.6	7216.14	4156.35	3419.72	0.110044	0.634803	0.710604	6487.92	7098.35
ADGRE4P	2909.94	1495.6	1750.69	1747.49	3545.14	331.605	1529.44	186.227	1745.5	135.309	325.655	124.657	276.645	244.624	-2.15331	0.00112237	0.00284532	2289.77	544.407
ADGRE5	13960.5	9120.41	11147.4	15124.3	15837.2	18474.1	41027.3	37350.5	45373.1	23855.4	60926.3	17161.8	13780.7	28510.7	1.1968	4.10538e-05	0.000137301	13037.9	31828.9
ADGRF3	88.6983	80.1616	84.6751	62.653	47.9073	79.0106	66.6332	63.3424	67.087	80.9435	28.834	39.7613	82.9934	100.256	-0.117784	0.615501	0.693781	72.8191	67.6512
ADGRG1	1471.76	2607.5	2170.21	2350.62	2607.17	658.422	1936.53	277.44	285.741	782.857	1141.49	2682.28	1389.9	763.949	-1.17267	0.00269875	0.00629157	2241.45	1102.07
ADGRG2	44.3492	19.3649	15.3955	35.4782	30.2573	46.6881	27.0698	60.8087	54.6634	62.8219	62.7564	37.612	41.9737	28.0716	0.662611	0.00260002	0.00608685	28.969	46.9406
ADGRG3	7782.65	1739.24	5146.49	8369.08	10336	13593.4	11288.1	26436.6	29866.1	21512.9	38067.7	22835.9	10155.7	14325.5	1.64559	2.88366e-12	3.02092e-11	6674.69	20898
ADGRG5	618.354	939.872	889.639	797.882	1052.7	252.595	535.148	98.8141	144.113	419.215	312.086	581.375	417.829	363.928	-1.3705	9.2093e-06	3.49615e-05	859.689	347.234
ADGRG6	42.4485	32.8753	39.0385	27.1748	23.9537	2.39426	1.04114	3.80054	3.72705	1.20811	8.48059	3.22389	18.125	6.01534	-2.73792	2.37859e-08	1.38197e-07	33.0981	5.3351
ADGRL1	445.392	550.323	428.874	416.68	472.139	441.741	515.366	483.936	446.004	408.342	498.659	542.688	465.526	566.445	0.0856474	0.655208	0.728338	462.682	485.412
ADGRL2	0	0.900692	0	0	0	80.2078	0	6.33424	1.24235	1.20811	0	7.52241	2.86184	0	5.81897	0.000307931	0.000872264	0.180138	11.0419
ADGRV1	35.4793	29.2725	18.6945	21.8908	23.3233	86.1934	22.9052	44.3396	37.2705	53.157	33.9224	48.3583	12.4013	29.0742	0.624383	0.0756432	0.121178	25.7321	40.8469
ADH1A	1.90068	2.70208	5.49839	0	1.26072	0	2.08229	0	0	0	0	3.22389	0	4.01023	-1.40969	0.303204	0.393304	2.27237	1.03516
ADH4	10.7705	3.15242	8.79742	0.754855	0	3.59139	6.24687	6.33424	0	4.83245	0	1.07463	1.90789	1.00256	-0.586985	0.55123	0.637646	4.69504	2.77667
ADH5	2221.26	2557.06	2366.51	2294.76	2247.86	1359.94	1440.94	1517.68	1197.63	1414.7	1138.1	1424.96	2222.7	1177	-0.719283	7.54368e-12	7.50928e-11	2337.49	1432.63
ADH6	34.2122	53.1408	58.2829	22.6456	23.3233	10.7742	20.8229	1.26685	4.9694	12.0811	1.69612	48.3583	11.4474	24.0614	-1.65867	6.84999e-09	4.32663e-08	38.321	15.0531
ADHFE1	626.59	877.274	579.53	576.709	738.781	389.068	545.56	271.105	206.23	345.52	493.57	416.956	521.809	444.133	-0.749323	0.0028801	0.00667095	679.777	403.772
ADI1	1723.92	1649.17	1745.19	2034.33	1725.92	1343.18	1426.37	1370.73	1196.38	1221.4	1380.64	1172.42	1171.45	1061.71	-0.50111	2.11642e-07	1.05386e-06	1775.71	1260.48
ADIPOR1	11176.6	5580.24	8667.65	12400	11577.2	24465.8	13077.8	19257.3	15480.9	16552.4	34834.9	22437.2	12302.1	11562.5	0.904129	1.49168e-07	7.57932e-07	9880.34	18885.7
ADIPOR2	3832.4	3822.99	4362.42	4348.72	4772.45	3420.2	3282.73	3406.55	4063.73	3219.62	2886.79	3698.88	4922.37	2731.97	-0.276276	0.0130728	0.0259393	4227.8	3514.76
ADIRF	5.06848	14.8614	8.79742	4.52913	5.04288	8.37992	9.3703	1.26685	3.72705	7.24868	3.39224	3.22389	6.67763	6.01534	-0.464042	0.286212	0.375182	7.65986	5.47799
ADK	488.474	498.083	801.115	509.527	697.808	770.952	402.923	304.043	703.171	695.873	558.023	272.956	317.664	489.248	-0.273966	0.335373	0.427242	599.001	501.65
ADM	900.288	191.397	436.572	1359.49	679.528	2181.17	1268.11	7616.28	6537.25	1975.26	3809.48	3223.89	924.375	6379.27	2.49948	4.69135e-09	3.03174e-08	713.456	3768.34
ADM2	21.541	9.45726	8.79742	5.28398	9.45539	40.7025	37.4812	110.216	64.6022	47.1164	91.5904	31.1643	20.0329	61.156	2.19185	1.53551e-11	1.44878e-10	10.907	56.0068
ADM5	22.1746	34.6766	24.7427	26.4199	15.1286	32.3225	40.6046	26.6038	22.3623	14.4974	35.6185	32.2389	18.125	25.0639	0.151995	0.58708	0.669332	24.6285	27.493
ADNP	4915.16	4532.73	4889.16	5031.86	4773.71	4508.4	4640.38	4607.52	5091.15	4954.47	5860.09	5504.25	5971.71	4580.68	0.0738399	0.387541	0.480706	4828.53	5079.85
ADNP-AS1	387.738	256.697	324.955	307.226	332.83	324.422	319.631	368.652	359.039	410.758	564.807	641.554	169.803	477.217	0.26669	0.030116	0.0542895	321.889	403.987
ADNP2	1303.87	1533.43	1927.18	1804.86	1748.62	1283.32	1471.14	1520.22	1249.81	1447.32	1925.09	2007.41	750.756	1877.79	-0.191315	0.158137	0.228405	1663.59	1503.65
ADO	891.418	1235.75	1063.39	1171.53	1071.61	460.895	563.259	497.871	495.698	490.494	483.394	510.449	859.506	692.767	-0.95963	5.92433e-18	1.42974e-16	1086.74	561.593
ADORA1	4.43492	0.900692	0.549839	0	6.3036	0	0	0	1.24235	0	0	0	1.90789	0	-2.68664	0.0882338	0.138372	2.43781	0.350027
ADORA2A	64.6231	18.4642	95.6719	91.3374	104.009	52.6738	63.5098	96.2804	119.266	91.8166	400.284	84.8958	25.7566	478.22	0.95748	0.0465995	0.0798651	74.8212	156.967
ADORA2A-AS1	120.376	47.2863	164.952	143.422	201.715	125.699	179.077	255.903	296.922	239.206	858.236	184.836	64.8684	1137.9	1.36345	0.00249338	0.00585663	135.55	371.406
ADORA2B	63.356	86.0161	75.8777	59.6335	42.8644	34.7168	49.9749	49.407	28.5741	53.157	39.0107	36.5374	167.895	49.1253	-0.360853	0.0866827	0.136255	65.5495	56.4887
ADORA3	83.6299	44.5842	54.9839	68.6918	81.9467	435.756	246.751	68.4097	161.506	276.658	195.054	176.239	607.664	29.0742	1.75894	3.6385e-05	0.000122877	66.7673	244.123
ADPGK	5344.71	4834.46	5413.71	6192.08	5792.37	7884.3	6493.62	8408.06	7486.41	7572.45	9233.67	6284.44	6689.08	6322.13	0.400315	8.16008e-11	6.94374e-10	5515.47	7374.91
ADPGK-AS1	72.2258	72.5057	102.82	122.286	97.0754	116.122	95.7853	126.685	172.687	142.557	156.043	162.269	89.671	174.445	0.543199	0.00445513	0.00990011	93.3826	137.363
ADPRH	400.41	571.489	515.199	578.219	473.4	373.505	288.397	661.294	797.589	489.286	230.672	307.344	1209.6	740.89	0.036514	0.866451	0.900838	507.743	566.509
ADPRHL1	17.1061	6.75519	6.04822	11.3228	11.3465	40.7025	14.576	25.3369	6.21175	36.2434	13.5689	12.8956	11.4474	19.0486	0.947812	0.0283534	0.0514243	10.5158	20.0034
ADPRHL2	534.091	412.517	427.774	360.821	422.971	411.813	774.611	755.041	644.78	566.605	437.598	406.21	495.098	555.417	0.350326	0.0411284	0.0715472	431.635	560.797
ADPRM	1217.07	1127.22	817.06	753.345	707.263	642.859	558.053	521.941	581.42	547.275	376.538	742.569	864.276	910.322	-0.526784	0.00149456	0.00369226	924.391	638.362
ADRA2A	10.7705	11.709	4.94855	12.8325	15.759	19.1541	21.864	19.0027	21.12	33.8272	49.1874	5.37315	16.2171	15.0384	0.87894	0.0343353	0.0610666	11.2039	22.3093
ADRA2B	0	0	2.74919	0	1.89108	5.98565	1.04114	2.53369	2.4847	3.62434	6.78447	8.59704	0	3.00767	1.63488	0.0650338	0.106317	0.928054	3.7843
ADRB1	17.1061	16.2125	35.7395	34.7233	79.4253	15.5627	27.0698	39.2723	24.847	6.04056	5.08835	6.44778	13.3553	40.1023	-0.935551	0.116428	0.175725	36.6413	19.754
ADRB2	627.224	624.179	636.713	680.879	851.616	1422.19	466.433	386.388	395.068	422.839	883.678	627.584	756.48	574.465	-0.0546012	0.846765	0.885265	684.122	659.458
ADRBK1	6058.73	5015.5	5420.86	5850.88	6403.19	8496.04	8630.05	12605.1	15534.4	9515.09	12402	8277.87	8250.69	8996.95	0.799021	7.85662e-08	4.18807e-07	5749.83	10300.9
ADRBK2	4315.17	5293.37	4860.02	5504.4	4612.34	3779.34	2625.77	4945.77	3661.21	3669.04	2211.74	3970.76	4912.83	2855.28	-0.45218	0.00786743	0.016462	4917.06	3625.75
ADRM1	210.975	233.279	264.472	242.308	262.23	401.039	482.05	717.035	606.267	529.153	505.443	333.135	363.454	418.066	0.943262	2.22175e-10	1.7745e-09	242.653	483.96
ADSL	1523.71	1618.54	1586.28	1577.65	1432.81	1268.96	1659.58	1301.05	1160.36	1418.32	971.876	1069.26	1405.16	1389.54	-0.261719	0.00807564	0.0168439	1547.8	1293.79
ADSS	3307.18	3374.89	3757.6	3774.27	3336.49	2797.7	2645.55	2837.74	2382.83	2075.54	3066.58	2863.89	2723.52	1381.52	-0.481017	0.00944543	0.0193566	3510.09	2530.54
ADSSL1	34.2122	46.3856	28.0418	16.6068	25.8447	26.3369	15.6172	21.5364	14.9082	9.6649	8.48059	10.7463	41.9737	17.0435	-0.78192	0.0368145	0.0650012	30.2182	18.4786
ADTRP	1376.09	921.858	1122.22	925.452	620.904	119.713	903.713	243.235	118.023	128.06	127.209	1572.18	269.967	1115.85	-1.36023	0.00103192	0.00263113	993.305	510.883
AEBP1	159.023	108.984	135.81	97.3763	81.3164	143.656	108.279	34.2049	192.564	28.9947	35.6185	582.449	118.289	150.384	0.180203	0.705143	0.769479	116.502	154.938
AEBP2	2085.68	2024.3	2133.37	1964.13	1940.25	1106.15	1223.34	904.529	901.947	897.628	1175.41	1632.36	1326.94	1445.69	-0.790493	2.55387e-14	3.59035e-13	2029.55	1179.33
AEN	684.878	762.886	850.05	938.285	695.917	622.508	641.345	340.782	449.731	634.259	535.973	948.898	352.96	946.414	-0.422184	0.0076988	0.0161484	786.403	608.097
AES	4177.06	5260.04	4799.54	3688.98	4209.54	2088.99	3275.44	2118.17	1868.5	1964.39	1212.72	3926.7	2383.91	3095.9	-0.879001	3.57508e-07	1.70222e-06	4427.03	2437.19
AFAP1	210.342	462.956	234.781	311.755	267.903	405.827	532.025	449.731	330.465	279.074	695.408	97.7913	133.553	379.969	0.143399	0.749526	0.80697	297.547	367.094
AFAP1-AS1	15.2054	7.65588	10.9968	10.568	27.7358	32.3225	20.8229	13.9353	4.9694	24.1623	39.0107	5.37315	10.4934	16.0409	0.359352	0.402232	0.496045	14.4324	18.5701
AFAP1L1	3.80136	4.95381	2.74919	1.50971	1.89108	13.1684	1.04114	13.9353	3.72705	14.4974	1.69612	0	10.4934	18.046	1.4573	0.046834	0.080209	2.98103	8.51165
AFAP1L2	50.0512	71.605	63.2314	54.3496	31.518	56.2652	72.8801	45.6065	55.9058	33.8272	81.4137	37.612	126.875	37.0946	0.160918	0.574936	0.65857	54.151	60.8311
AFF1	10322.6	8154.86	10007.6	9985.22	11373.6	8140.49	7991.82	13222.1	20182	13413.7	10807.7	12323.9	11444.5	17778.3	0.358552	0.0549543	0.0921712	9968.77	12811.6
AFF2	174.229	83.314	90.1735	202.301	151.286	167.598	256.122	200.162	401.279	233.166	162.827	87.045	95.3947	108.276	0.380245	0.285377	0.374243	140.261	190.208
AFF3	1276.62	982.204	1069.99	613.697	688.353	911.017	290.479	103.881	677.081	144.974	133.993	2873.56	289.046	605.545	-0.831203	0.0841925	0.132912	926.173	669.953
AFF4	10734.4	9343.33	10925.3	12007.5	10452.6	9841.61	7483.75	7445.26	10223.3	9521.14	10821.2	14387.1	8980.46	14291.5	-0.0590237	0.685103	0.753676	10692.6	10332.8
AFG3L1P	1201.23	1190.26	1027.65	976.027	1187.6	1112.13	1073.42	895.661	773.985	816.684	868.413	1432.48	1214.37	789.013	-0.165565	0.154174	0.22341	1116.55	997.352
AFG3L2	983.285	1191.62	1262.98	1138.32	1036.31	688.35	760.035	656.227	565.27	776.816	413.853	745.793	794.638	738.885	-0.718248	6.51146e-15	1.00302e-13	1122.5	682.207
AFMID	166.626	226.524	337.601	267.219	346.067	250.2	194.694	184.96	181.383	276.658	101.767	203.105	469.342	227.58	-0.296204	0.147093	0.214639	268.807	232.188
AFTPH	4873.34	3325.8	3805.98	4506.48	3874.82	7155.25	5962.63	7797.44	7595.73	7373.11	7483.27	5720.25	7033.45	5333.6	0.729819	3.21009e-11	2.88953e-10	4077.29	6828.31
AGA	574.005	813.325	567.983	756.365	706.633	482.444	411.252	282.507	460.912	453.042	347.704	634.032	476.02	586.496	-0.582332	1.52675e-05	5.54552e-05	683.662	459.379
AGAP1	388.372	641.743	414.028	518.585	550.934	61.0537	193.653	22.8032	21.12	57.9894	110.248	356.777	118.289	61.156	-2.46873	3.17411e-10	2.46568e-09	502.733	111.454
AGAP11	9.50339	12.1593	5.49839	3.77427	2.52144	9.57705	4.16458	2.53369	3.72705	3.62434	0	1.07463	3.81579	11.0281	-0.56766	0.33245	0.424029	6.69137	4.39392
AGAP2	1333.01	1122.26	1210.19	1284.01	1637.67	2030.33	1578.37	1663.37	2038.7	1679.28	4513.37	2613.5	1504.37	1413.61	0.612968	0.000925661	0.0023842	1317.43	2114.99
AGAP3	245.821	266.605	237.53	281.561	279.88	229.849	305.055	463.666	228.593	167.928	227.28	166.568	228.947	212.542	-0.12326	0.554678	0.640933	262.279	247.825
AGAP4	321.848	172.032	207.839	270.993	276.097	143.656	36.4401	160.89	21.12	109.938	281.556	162.269	34.3421	165.422	-1.17162	0.00175511	0.00426277	249.762	123.959
AGAP5	256.592	252.644	237.53	184.939	219.365	234.638	153.048	169.758	172.687	222.293	123.817	177.314	234.671	153.391	-0.339859	0.00607936	0.0130632	230.214	182.402
AGAP6	599.981	784.503	532.794	605.394	532.654	682.365	647.592	449.731	506.879	414.383	361.273	516.897	600.033	624.593	-0.187806	0.187034	0.262417	611.065	533.749
AGAP7P	590.478	175.185	633.414	243.818	496.093	397.447	1523.19	358.518	286.983	381.764	810.744	397.613	235.625	175.448	0.245006	0.604358	0.68394	427.797	507.482
AGAP9	121.643	80.1616	51.6848	126.061	44.1252	46.6881	47.8926	34.2049	43.4823	27.7866	32.2262	54.8061	64.8684	36.0921	-0.980472	0.000412359	0.00113952	84.7352	43.1164
AGBL2	138.75	141.859	113.267	92.8472	80.686	132.882	108.279	57.0081	111.812	73.6949	76.3253	94.5674	91.5789	108.276	-0.227915	0.247831	0.33289	113.482	94.9359
AGBL3	93.7668	121.143	74.778	71.7112	65.5574	43.0967	52.0572	12.6685	27.3317	48.3245	57.668	39.7613	34.3421	51.1304	-1.0675	1.37153e-06	6.02576e-06	85.3913	40.7089
AGBL4	0	2.25173	6.59806	1.50971	1.89108	3.59139	0	1.26685	0	0	3.39224	0	0	1.00256	-1.58495	0.203454	0.282038	2.45012	1.02811
AGBL5	582.875	529.607	546.54	519.34	591.277	555.469	530.984	554.879	523.03	527.945	490.178	474.986	483.651	591.509	-0.0695627	0.469231	0.561676	553.928	525.848
AGER	1086.55	621.027	826.957	904.316	988.404	2808.47	2460.22	3970.3	3155.57	2029.63	3653.44	1894.57	1246.81	1590.06	1.43333	3.95421e-26	2.71127e-24	885.452	2534.34
AGFG1	8783.04	6077.87	7696.09	10137.7	8344.7	20606.2	13092.4	14610.5	23961.2	19793.7	32178.8	26608.9	18715.5	15116.6	1.30701	1.92303e-10	1.55224e-09	8207.88	20520.4
AGFG2	209.075	264.803	238.08	207.585	244.579	181.964	127.02	108.949	83.2375	90.6084	89.8943	121.433	100.164	127.325	-1.01725	1.92361e-08	1.13358e-07	232.825	114.511
AGGF1	1664.36	1553.24	1488.96	1430.45	1449.83	1678.38	1301.43	1565.82	1672.2	1513.77	1300.92	1163.82	2505.06	1368.49	0.0126274	0.911761	0.935907	1517.37	1563.32
AGK	1586.43	1887.85	1781.48	1591.23	1562.03	823.626	1044.27	501.671	489.486	759.903	663.182	1116.54	964.44	985.514	-1.0618	2.9072e-32	4.80144e-30	1681.81	816.515
AGL	2152.2	2060.33	2095.98	1960.36	1833.72	1308.46	1188.99	914.664	1234.9	1007.57	1175.41	1824.72	1688.49	1239.16	-0.653415	1.93207e-06	8.2667e-06	2020.52	1286.93
AGMAT	221.112	213.014	214.987	107.944	93.9236	65.8422	185.324	51.9407	49.694	78.5273	45.7952	77.3733	70.5921	107.274	-1.04365	6.37788e-05	0.000205872	170.196	81.3736
AGMO	22.8081	0.900692	8.24758	4.52913	1.26072	20.3512	7.28801	5.06739	8.69646	12.0811	15.2651	8.59704	0.953947	3.00767	0.245415	0.694201	0.760888	7.54925	9.03421
AGO1	4298.07	4014.83	4381.11	5277.95	4739.04	4589.8	3026.61	4938.17	4775.6	4865.07	5179.94	4342.58	4332.83	3178.11	-0.0766742	0.478311	0.570208	4542.2	4358.74
AGO2	880.648	660.657	750.53	1008.49	810.012	1405.43	1176.49	1567.09	2124.42	1134.42	2362.69	1391.65	671.579	1047.67	0.71	2.44852e-05	8.552e-05	822.067	1431.27
AGO3	1120.13	941.223	976.513	1151.91	1017.4	915.805	766.282	907.062	1070.91	971.323	1009.19	816.719	781.283	817.084	-0.2279	0.0136703	0.0269923	1041.44	895.073
AGO4	20787.1	9032.59	12820	18329.4	19457.3	33353.3	26735.5	34714.1	32327.2	30976	51204.1	28633.5	26044.7	16202.3	0.940787	3.14781e-09	2.09336e-08	16085.3	31132.3
AGPAT1	999.124	828.636	896.787	1283.25	1226.05	2339.19	2267.61	1885.07	2221.32	2162.52	2271.1	1309.97	1503.42	1377.51	0.864555	3.18045e-07	1.5285e-06	1046.77	1926.41
AGPAT2	38.0136	39.1801	57.1832	70.2015	83.2075	93.3762	183.241	219.165	238.531	141.349	198.446	107.463	117.335	119.304	1.41156	2.81598e-08	1.61827e-07	57.5572	157.579
AGPAT3	1087.82	1412.28	1410.34	1447.81	1369.77	798.486	1186.9	1748.25	1397.64	965.282	639.437	953.197	1503.42	1507.85	-0.20691	0.201557	0.279735	1345.61	1188.94
AGPAT4	1454.65	1983.32	1946.98	2325.71	2189.24	954.113	1781.4	832.319	556.573	918.166	1226.29	1412.06	1113.26	1147.93	-0.851452	0.000248202	0.000714134	1979.98	1104.68
AGPAT4-IT1	121.01	139.157	147.357	150.216	170.827	43.0967	72.8801	31.6712	50.9364	43.4921	59.3641	59.1046	70.5921	55.1406	-1.43541	5.80998e-07	2.69341e-06	145.713	54.0309
AGPAT5	637.361	716.951	647.71	509.527	559.129	439.347	317.549	198.895	280.771	251.287	162.827	1085.38	800.361	309.79	-0.684811	0.0216515	0.040583	614.135	427.356
AGPAT6	3146.89	2864.65	3515.12	3825.6	3640.96	4242.63	3180.7	4384.56	3423.92	4223.56	8809.64	7291.36	4078.12	4039.3	0.469814	0.0110705	0.0223302	3398.64	4852.64
AGPAT9	2683.76	855.207	1713.85	2028.3	2421.21	3420.2	2576.83	5318.22	3479.82	3312.64	5039.17	2383.53	2657.7	2681.84	0.801861	1.64774e-05	5.94744e-05	1940.46	3430
AGPS	2415.76	3058.3	2765.14	3008.1	2694.79	1727.46	2095.82	1826.79	1854.83	1872.57	1326.36	1667.83	2561.35	1652.21	-0.609703	3.0896e-05	0.000105712	2788.42	1842.8
AGRN	5.70204	6.75519	14.8456	8.3034	12.6072	20.3512	30.1932	143.154	136.659	44.7002	16.9612	27.9404	27.6645	183.468	2.84339	4.92223e-06	1.96445e-05	9.64269	70.1212
AGRP	1.90068	4.05311	1.64952	0	1.26072	3.59139	1.04114	5.06739	6.21175	2.41623	0	0	9.53947	4.01023	0.816407	0.283059	0.371716	1.77281	3.54196
AGTPBP1	13217.3	6981.71	8318.51	12437.7	12105.4	16570.7	14443.8	18969.8	20073.9	14829.6	29059.6	16757.8	14336.9	11317.9	0.692155	3.93791e-07	1.86436e-06	10612.1	17373.3
AGTRAP	757.737	617.875	776.372	757.874	932.302	3147.26	3058.88	6393.78	5627.85	3363.39	5190.12	2200.84	2436.38	2985.62	2.2002	1.06463e-35	3.06371e-33	768.432	3822.68
AHCTF1	9524.94	4906.97	9060.24	9915.02	9551.84	12487.3	10548.9	13584.4	11681.8	12073.9	21508.5	14937.4	7697.4	11590.6	0.556525	7.84063e-05	0.0002489	8591.8	12901.1
AHCTF1P1	24.7088	7.65588	23.6431	14.3422	8.19467	37.1111	40.6046	22.8032	17.3929	16.9136	78.0214	46.2091	8.58552	45.1151	1.01022	0.0016619	0.00405922	15.7089	34.7507
AHCY	467.567	700.738	667.504	671.821	625.947	557.863	736.089	591.618	650.992	866.217	432.51	426.628	643.914	497.268	-0.0746505	0.611244	0.690145	626.715	600.344
AHCYL1	3099.37	2713.78	2886.1	3254.18	3125.95	2670.8	2693.44	2871.94	2902.13	2382.4	3185.31	2509.26	3972.24	1893.83	-0.126404	0.296003	0.385494	3015.88	2786.82
AHCYL2	1078.32	1261.42	1269.58	1276.46	1193.9	780.529	823.545	637.224	638.568	618.554	612.299	821.017	1015.95	857.186	-0.691347	7.35895e-12	7.33694e-11	1215.94	756.097
AHDC1	66.5238	86.9168	84.6751	67.1821	59.8842	43.0967	92.6619	36.7386	54.6634	48.3245	61.0603	84.8958	70.5921	59.1509	-0.248509	0.260061	0.346595	73.0364	61.2427
AHI1	372.533	436.836	558.086	573.69	524.459	114.925	149.925	91.213	81.9952	286.323	128.905	261.135	110.658	206.527	-1.66577	9.05615e-09	5.62286e-08	493.121	159.067
AHNAK	174520	189740	173670	219694	198940	73385.3	83966.2	91016.6	57144.4	62848.4	65500.7	64546.6	116889	105480	-1.27445	6.9623e-17	1.4644e-15	191313	80086.4
AHNAK2	80.4621	83.7643	67.0803	67.1821	42.2341	19.1541	16.6583	2.53369	139.143	3.62434	3.39224	60.1793	3.81579	54.1381	-1.12823	0.10519	0.161067	68.1446	33.6266
AHR	7308.11	7759.01	18302.5	13002.4	10151.3	6715.9	6175.03	18559.3	7127.37	9892.03	9720.45	1645.26	8279.31	20520.3	-0.269803	0.465968	0.558605	11304.7	9848.33
AHRR	13.3048	6.30484	15.9453	30.1942	6.93395	53.8709	20.8229	79.8114	53.4211	64.03	37.3146	23.6419	21.9408	52.133	1.61449	1.76301e-05	6.32689e-05	14.5366	45.2207
AHSA1	1175.89	1155.59	1094.18	1208.52	1140.95	1449.73	1488.84	1459.41	1303.23	1327.72	1287.35	994.033	1293.55	1214.1	0.175633	0.0498666	0.0847532	1155.03	1313.11
AHSA2	5398.56	5405.95	4751.15	3882.22	4152.81	4498.82	3850.15	4176.79	4135.79	3572.39	3904.46	5550.46	5048.29	2718.94	-0.174318	0.20664	0.285864	4718.14	4161.79
AHSP	4.43492	8.55657	10.4469	11.3228	20.8019	28.7311	24.9875	268.572	26.0894	7.24868	44.0991	35.4628	2.86184	9.02302	1.55959	0.0220391	0.0411876	11.1126	49.675
AICDA	6.3356	4.50346	6.59806	2.26456	6.3036	37.1111	29.152	5.06739	19.8776	41.0758	37.3146	10.7463	4.76973	3.00767	1.91394	0.000478978	0.00130933	5.20106	20.9025
AIDA	1957.7	2196.34	2072.89	1853.17	1796.52	1188.75	1360.78	1301.05	1739.29	1297.51	797.176	1437.85	1730.46	1414.61	-0.531042	0.000334874	0.000941424	1975.32	1363.05
AIF1	17432.4	13359.1	16248.8	20763	17431.3	18711.2	13332.9	24033.4	13888.2	13776.1	21143.8	9756.56	17286.5	15795.3	-0.0863278	0.718479	0.780713	17046.9	16413.8
AIF1L	1.26712	4.50346	2.19935	2.26456	2.52144	3.59139	18.7406	8.86793	3.72705	2.41623	3.39224	3.22389	12.4013	5.01279	1.36433	0.0139673	0.0275103	2.55119	6.81927
AIFM1	622.156	825.484	721.938	822.037	728.065	714.687	650.715	762.642	719.321	823.933	520.708	450.27	956.809	663.693	-0.120847	0.272897	0.360791	743.936	695.864
AIFM2	110.873	94.1223	85.7748	71.7112	80.0557	107.742	91.6207	53.2076	99.3881	114.771	54.2758	69.8509	98.2565	78.1995	-0.053273	0.818892	0.863396	88.5074	85.2568
AIFM3	26.6095	38.2794	45.6366	47.5559	42.8644	37.1111	62.4687	108.949	75.7834	94.2328	30.5301	39.7613	64.8684	86.2199	0.68228	0.0114933	0.0230973	40.1892	66.6583
AIG1	626.59	455.3	448.668	612.187	605.775	602.157	550.765	665.095	504.394	862.592	866.716	487.882	580.954	777.984	0.258195	0.185204	0.260202	549.704	655.393
AIM1	8056.34	6358.88	7370.04	7376.44	7152.69	10331.2	6069.87	7950.73	9995.96	8430.21	9349	14015.3	11784.1	10552.9	0.435088	0.00481858	0.0106183	7262.88	9831.04
AIM1L	108.972	202.205	89.6237	127.57	126.702	96.9676	82.2504	51.9407	105.6	78.5273	147.562	268.657	66.7763	55.1406	-0.412285	0.143556	0.21022	131.015	105.936
AIM2	596.813	595.357	761.526	528.398	529.502	1019.96	1648.13	3259.6	5815.44	3270.36	1975.98	2497.44	4285.13	3642.29	2.32827	3.53832e-10	2.72962e-09	602.319	3046.04
AIMP1	1825.29	1785.17	2006.91	1721.82	1666.67	1110.94	1133.81	1097.09	862.192	1012.4	734.419	1021.97	1429.97	1218.11	-0.760605	6.08258e-14	8.14714e-13	1801.17	1068.99
AIMP2	50.0512	62.1477	67.6301	42.2719	54.2109	80.2078	54.1395	84.8788	49.694	74.903	50.8835	34.3882	97.3026	54.1381	0.166104	0.331961	0.423503	55.2624	64.5039
AIP	571.471	582.748	527.295	456.687	573.627	426.179	688.196	728.437	593.844	561.772	556.327	596.42	618.158	648.655	0.147939	0.429019	0.522633	542.366	601.999
AIRE	5.06848	4.50346	1.64952	1.50971	3.78216	1.19713	2.08229	3.80054	1.24235	4.83245	1.69612	36.5374	0	2.00511	0.0427211	0.949536	0.963641	3.30266	5.9326
AIRN	5.70204	2.70208	1.64952	9.81311	2.52144	25.1397	23.9463	26.6038	39.7552	31.4109	71.237	16.1194	13.3553	23.0588	2.67623	1.19321e-11	1.14747e-10	4.47764	30.0696
AJAP1	16.4726	8.10623	13.746	12.8325	27.7358	0	1.04114	0	0	0	0	0	0	3.00767	-4.91411	4.05478e-09	2.64739e-08	15.7786	0.449868
AJUBA	22.1746	18.9145	10.9968	18.8714	12.6072	64.6451	41.6458	55.7413	79.5105	32.619	42.403	84.8958	20.0329	35.0895	1.54862	1.28937e-05	4.74871e-05	16.7129	50.7314
AK1	200.205	249.041	216.087	228.721	280.51	122.107	329.002	88.6793	78.2681	79.7354	186.573	233.195	102.072	287.734	-0.564931	0.0740615	0.119056	234.913	167.485
AK2	4277.16	4804.74	4723.11	5098.29	4723.91	3007.19	3152.59	3898.09	3107.12	2880.14	2109.97	2542.57	4734.44	3142.01	-0.60342	1.05193e-10	8.81703e-10	4725.44	3174.9
AK3	1301.33	1212.78	1102.98	1109.64	1287.19	973.267	1313.92	567.547	755.349	1000.32	702.193	1087.53	1094.18	1034.64	-0.3587	0.00186355	0.00449845	1202.78	947.66
AK4	43.7156	30.1732	41.7877	48.3107	52.9502	31.1254	80.1681	127.952	180.141	79.7354	49.1874	15.0448	180.296	126.322	0.94077	0.00186755	0.00450611	43.3875	96.6635
AK5	379.502	339.11	406.331	166.068	149.395	37.1111	120.773	40.5391	33.5435	31.4109	72.9331	49.433	67.7302	159.407	-2.06203	9.83361e-09	6.07381e-08	288.081	68.0978
AK6	93.1333	124.295	107.768	140.403	98.9664	122.107	107.238	98.8141	73.2987	120.811	81.4137	105.314	187.928	95.2429	-0.0563554	0.731604	0.791803	112.913	110.241
AK7	5.70204	2.70208	2.19935	0.754855	0.63036	4.78852	0	0	1.24235	1.20811	3.39224	1.07463	0.953947	0	-0.92123	0.301078	0.391	2.39774	1.40664
AK8	7.60272	8.55657	9.89709	3.77427	6.93395	5.98565	4.16458	1.26685	19.8776	0	1.69612	3.22389	2.86184	1.00256	-0.809011	0.289885	0.379052	7.35292	4.45323
AK9	703.251	600.311	547.639	504.998	586.234	630.888	553.889	575.149	588.874	624.594	619.083	599.643	583.816	641.637	0.0367189	0.694261	0.760888	588.487	601.953
AKAP1	710.854	698.487	670.803	655.214	521.307	434.559	458.104	241.968	282.014	433.712	203.534	348.18	539.934	394.005	-0.846596	4.30831e-10	3.28361e-09	651.333	370.668
AKAP10	3903.99	3227.18	3333.67	3405.91	3419.7	4271.36	3520.11	5646.34	4466.25	5623.76	5220.65	4075	4073.35	3591.16	0.352074	0.00288045	0.00667095	3458.09	4498.67
AKAP11	4751.06	5830.18	5311.44	4641.6	4483.12	2387.08	2395.67	1316.25	1869.74	1417.12	1211.03	3639.77	3194.77	2049.23	-1.24783	8.40647e-26	5.5843e-24	5003.48	2164.52
AKAP12	321.215	80.6119	115.466	144.932	104.64	9.57705	15.6172	8.86793	28.5741	10.873	11.8728	12.8956	41.0197	44.1125	-3.06636	1.07285e-08	6.58162e-08	153.373	20.3789
AKAP13	28742.7	24752.8	30293.9	30781.5	33083.8	26691.2	32908.5	31781.4	46642.8	44467	47710.1	41013.2	42781.7	36702.6	0.398439	0.00612135	0.0131445	29530.9	38966.5
AKAP14	0.63356	4.95381	6.04822	7.54855	1.89108	3.59139	9.3703	7.60108	4.9694	2.41623	6.78447	4.29852	0.953947	7.0179	0.25186	0.65822	0.731001	4.21504	5.22258
AKAP3	21.541	21.1663	19.7942	19.6262	22.0626	28.7311	9.3703	8.86793	18.6353	18.1217	1.69612	25.7911	26.7105	28.0716	-0.286109	0.489646	0.580805	20.8381	18.444
AKAP5	443.492	1127.22	1422.98	551.799	1117.63	113.727	255.08	46.8733	36.0282	199.339	86.502	552.36	292.862	205.524	-2.48292	1.27328e-14	1.89377e-13	932.623	198.7
AKAP6	103.904	62.1477	33.5402	70.9564	20.1715	19.1541	15.6172	6.33424	14.9082	2.41623	1.69612	10.7463	34.3421	25.0639	-2.21647	5.26699e-06	2.09236e-05	58.1439	14.4754
AKAP7	530.289	470.611	566.884	516.321	383.259	228.652	285.274	201.429	171.444	189.674	139.082	121.433	353.914	378.967	-1.15023	1.22012e-05	4.5226e-05	493.473	229.985
AKAP8	2188.95	1956.75	2450.63	2337.79	2409.23	1519.16	1957.35	2534.96	1895.83	2202.39	2384.74	2717.74	1443.32	2885.36	-0.0745466	0.573047	0.657081	2268.67	2171.21
AKAP8L	3023.35	2604.35	2688.71	3055.65	2849.23	2585.8	2932.9	3162.05	2808.96	2407.77	3395.63	3544.13	2814.14	2793.12	0.0437264	0.633095	0.709068	2844.26	2938.28
AKAP9	7709.15	7144.74	8955.77	8609.88	9063.94	5451.73	4117.73	4654.4	5199.24	5225.09	4382.77	6937.81	6343.75	6474.51	-0.618253	1.04796e-07	5.44945e-07	8296.7	5420.78
AKIP1	82.9963	104.48	78.0771	127.57	69.3395	81.4049	96.8264	83.6119	57.1481	70.0705	59.3641	46.2091	120.197	60.1534	-0.335747	0.0986649	0.15239	92.4927	74.9984
AKIRIN1	6584.59	4126.52	6195.03	7358.33	6528.63	8156.05	7072.49	8821.06	8995.86	8351.68	11806.7	7291.36	6036.58	7985.37	0.409652	5.61825e-06	2.21707e-05	6158.62	8279.68
AKIRIN2	2381.55	1180.81	2193.31	2844.29	2235.89	7183.98	6437.4	8134.43	8123.73	6215.74	10521	4059.95	3607.83	5404.79	1.56959	1.0948e-35	3.10352e-33	2167.17	6632.1
AKNA	8849.56	8612.42	9093.78	8843.88	10825.2	16242.7	15615.1	16026.9	20336	16003.9	22682.2	15759.4	10654.6	13622.7	0.78413	1.82108e-07	9.14777e-07	9244.96	16327.1
AKNAD1	2.53424	1.80138	1.09968	1.50971	0	1.19713	1.04114	0	4.9694	6.04056	1.69612	4.29852	0	0	0.564754	0.506616	0.59591	1.389	2.1381
AKR1A1	1219.6	1623.5	1497.21	1804.1	1527.99	1189.95	1140.05	1460.67	1279.62	1537.93	620.779	747.942	1668.45	1676.28	-0.329722	0.0385016	0.0675779	1534.48	1257.96
AKR1B1	801.453	973.198	892.388	963.195	912.761	563.849	697.567	510.539	484.517	704.33	430.814	554.509	649.638	585.493	-0.658601	1.13832e-09	8.08836e-09	908.599	575.695
AKR1C1	81.0956	42.7829	58.8327	60.3884	75.0128	41.8996	14.576	53.2076	32.3011	20.5379	22.0495	20.418	24.8026	36.0921	-1.12074	0.000920731	0.00237311	63.6225	29.5427
AKR1C2	14.5719	5.8545	13.1961	9.05826	11.3465	9.57705	15.6172	1.26685	3.72705	4.83245	10.1767	1.07463	2.86184	10.0256	-0.702779	0.181421	0.256055	10.8054	6.57326
AKR1C3	299.674	898.89	826.407	350.253	590.017	263.369	300.891	288.841	359.039	260.952	300.213	258.986	427.368	199.509	-0.985883	0.000183774	0.000543849	593.048	295.463
AKR1C4	25.3424	37.3787	44.5369	67.1821	59.8842	63.4479	52.0572	88.6793	28.5741	61.6137	62.7564	52.6569	24.8026	45.1151	0.1509	0.64753	0.721533	46.8649	53.3004
AKR1C6P	9.50339	6.75519	2.19935	10.568	5.04288	1.19713	4.16458	1.26685	6.21175	0	0	0	0.953947	4.01023	-1.77686	0.0227603	0.0424018	6.81376	1.97828
AKR1C8P	21.541	27.0208	47.836	33.2136	43.4948	23.9426	27.0698	40.5391	11.1812	18.1217	11.8728	21.4926	4.76973	4.01023	-0.995457	0.0482627	0.0823809	34.6212	18.1111
AKR1E2	146.986	41.4318	74.778	75.4855	88.2503	31.1254	24.9875	27.8706	6.21175	21.746	15.2651	21.4926	25.7566	41.1048	-1.82018	1.17628e-08	7.17439e-08	85.3863	23.9512
AKR7A2	236.951	293.175	229.283	252.876	216.844	152.036	185.324	167.224	142.87	135.309	94.9826	147.224	178.388	116.297	-0.748036	3.87153e-09	2.54084e-08	245.826	146.628
AKR7A2P1	8.23628	5.8545	24.7427	10.568	14.4983	5.98565	6.24687	6.33424	7.45411	15.7055	1.69612	8.59704	4.76973	27.069	-0.45073	0.39531	0.488619	12.7799	9.31758
AKR7A3	6.96916	8.10623	3.84887	3.77427	5.67324	10.7742	7.28801	1.26685	8.69646	1.20811	3.39224	4.29852	2.86184	1.00256	-0.321968	0.543053	0.629913	5.67435	4.53208
AKR7L	32.9451	18.9145	15.9453	10.568	14.4983	13.1684	11.4526	13.9353	8.69646	20.5379	11.8728	23.6419	14.3092	24.0614	-0.231067	0.435853	0.529361	18.5742	15.7418
AKT1	1979.24	1839.21	1890.34	1722.58	2210.04	3442.95	4113.56	3647.25	3763.08	3449.16	3667.01	2662.93	2038.58	1803.6	0.694087	0.00768856	0.0161287	1928.28	3176.46
AKT1S1	273.698	303.983	340.35	323.833	344.807	266.96	387.306	438.329	273.317	289.947	446.079	458.867	279.506	310.793	0.131714	0.436534	0.530115	317.334	350.123
AKT2	2290.32	2292.71	2298.33	2111.33	2338	2450.53	2979.76	3099.97	3041.28	2370.32	3030.96	2906.87	1857.33	2982.61	0.264965	0.114283	0.172982	2266.14	2746.63
AKT3	2230.76	2520.14	2581.49	2087.17	2274.34	773.347	745.459	263.504	521.787	474.788	741.204	1277.73	970.164	1296.31	-1.64544	3.71722e-16	7.02633e-15	2338.78	784.922
AKTIP	1599.1	993.463	1109.02	1170.03	1367.88	2794.1	1490.92	1755.85	1802.65	1745.72	3161.56	1990.21	1832.53	1058.7	0.631594	0.000464103	0.00127251	1247.9	1959.14
ALAD	1488.23	1561.8	1558.79	1524.05	1422.72	1392.26	1275.4	1309.92	1330.56	1255.23	1407.78	1143.41	1761.94	980.501	-0.209177	0.0427754	0.0740304	1511.12	1317.44
ALAS1	1001.66	678.221	708.742	1267.4	1067.2	4540.72	1730.38	3461.03	3671.15	2112.99	1857.25	1034.87	2500.29	2530.45	1.42396	3.19869e-10	2.48274e-09	944.644	2604.35
ALAS2	67.1573	110.335	100.071	166.068	358.044	138.867	120.773	4797.55	98.1457	35.0353	625.868	146.15	64.8684	80.2046	0.836653	0.331171	0.422796	160.335	678.607
ALB	2.53424	4.50346	4.39871	2.26456	6.93395	9.57705	4.16458	1.26685	2.4847	1.20811	1.69612	8.59704	3.81579	11.0281	0.0774509	0.883978	0.914505	4.12699	4.87093
ALCAM	1312.1	841.246	1240.99	1833.54	1075.39	1375.5	2190.57	1070.49	2519.49	1077.64	1429.83	1646.33	1506.28	1074.74	0.294626	0.172733	0.245913	1260.65	1543.43
ALDH16A1	250.89	335.508	192.443	196.262	250.883	250.2	233.216	198.895	200.018	247.663	227.28	263.284	166.941	318.813	-0.057198	0.734747	0.794427	245.197	234.035
ALDH18A1	614.553	716.951	688.398	595.581	709.785	480.05	485.173	217.898	253.44	771.984	237.457	428.777	449.309	551.406	-0.64446	0.00268273	0.00625805	665.053	430.61
ALDH1A1	1059.31	1325.37	2216.95	2304.57	1875.95	893.06	238.422	1657.04	695.717	555.732	252.722	399.762	1806.78	451.151	-1.39222	3.8023e-05	0.000127976	1756.43	772.264
ALDH1A2	26.6095	5.40415	7.69774	10.568	17.6501	81.4049	32.2755	76.0108	38.5129	100.273	127.209	46.2091	20.0329	38.0972	2.13109	4.5868e-10	3.47357e-09	13.5859	62.225
ALDH1A3	13.3048	9.00692	4.94855	15.852	8.82503	22.7455	5.20572	12.6685	18.6353	21.746	22.0495	9.67167	16.2171	3.00767	0.438065	0.340032	0.432219	10.3874	14.6608
ALDH1B1	51.9519	78.8105	98.4211	57.369	80.686	39.5053	46.8515	25.3369	22.3623	106.314	30.5301	16.1194	76.3158	24.0614	-0.850901	0.0218125	0.0408328	73.4477	43.0441
ALDH1L2	23.4417	28.3718	28.5916	22.6456	37.8216	114.925	34.3578	58.275	69.5717	158.263	23.7457	40.8359	138.322	114.292	1.58081	0.00106957	0.00271983	28.1745	83.6208
ALDH2	1685.9	2406.65	2195.51	3889.01	2928.65	2679.18	3239	5506.98	4004.1	2479.05	2925.8	1359.41	4414.87	1484.79	0.141292	0.454544	0.547268	2621.14	3121.46
ALDH3A2	1317.8	1607.28	1363.05	1441.77	1200.83	870.314	992.211	857.655	908.159	912.125	508.835	872.599	1624.57	873.227	-0.603708	8.96946e-11	7.59167e-10	1386.15	935.522
ALDH3B1	625.957	554.376	504.752	717.867	669.442	1169.6	1165.04	1475.88	1357.89	1227.44	1251.74	726.45	1074.14	541.381	0.796877	5.7159e-10	4.26403e-09	614.479	1109.95
ALDH4A1	31.0444	58.545	41.7877	61.1432	44.7555	98.1647	107.238	108.949	141.628	112.354	101.767	36.5374	64.8684	122.312	1.02445	8.47177e-05	0.000267416	47.4552	99.3132
ALDH5A1	433.988	481.87	416.778	303.452	278.619	263.369	199.9	122.884	134.174	96.649	125.513	422.33	213.684	192.491	-1.00606	2.97655e-09	1.98922e-08	382.941	196.777
ALDH6A1	375.067	375.588	329.903	285.335	316.44	153.233	240.504	120.35	122.993	167.928	139.082	156.896	207.006	158.404	-1.05147	1.04501e-15	1.8276e-14	336.467	162.933
ALDH7A1	47.517	67.1015	41.2379	19.6262	11.3465	46.6881	17.6995	8.86793	14.9082	6.04056	0	49.433	47.6973	23.0588	-0.758971	0.118542	0.178376	37.3658	23.8215
ALDH8A1	49.4177	57.1939	64.3311	20.3811	49.7984	51.4766	38.5223	41.806	43.4823	54.3651	55.9719	50.5076	63.9144	54.1381	0.070314	0.760005	0.815403	48.2244	50.4649
ALDH9A1	2112.92	1864.43	2042.1	2481.96	2140.07	1989.63	2491.46	2298.06	2074.73	2276.08	2221.91	1710.81	2423.98	1698.33	-0.00917387	0.919015	0.941558	2128.3	2131.67
ALDOA	7010.34	5496.92	6600.81	8620.44	8246.99	12948.2	12744.6	18141.2	14829.9	13231.2	20448.4	9924.21	10937	9470.16	0.875076	2.77932e-09	1.86727e-08	7195.1	13630.6
ALDOB	27.8766	18.0138	15.9453	2.26456	3.78216	34.7168	23.9463	6.33424	6.21175	8.45679	22.0495	25.7911	12.4013	11.0281	0.324797	0.511568	0.600879	13.5765	16.7707
ALDOC	443.492	411.166	378.289	385.731	393.344	367.519	298.808	310.378	421.157	256.12	383.323	181.612	177.434	225.575	-0.526165	0.00655489	0.0139806	402.404	291.325
ALG1	132.414	162.125	141.858	114.738	135.527	90.982	91.6207	81.0782	53.4211	181.217	39.0107	87.045	140.23	84.2148	-0.576403	0.00481737	0.0106169	137.332	94.3133
ALG10	731.128	657.055	560.285	557.083	575.518	263.369	217.599	159.623	250.955	283.906	206.926	465.315	403.52	372.951	-1.11137	2.20433e-11	2.03139e-10	616.214	291.574
ALG10B	1607.34	1641.06	1679.76	1627.47	1516.64	849.963	793.352	315.445	572.724	482.037	496.963	1460.42	810.855	992.532	-1.18941	1.91455e-23	9.46956e-22	1614.45	752.699
ALG11	369.999	402.609	507.501	425.738	433.057	162.81	197.817	235.634	263.378	328.607	179.789	270.807	352.006	491.253	-0.642858	0.0012115	0.00304647	427.781	275.789
ALG12	138.116	178.337	189.694	156.255	154.438	187.95	237.381	230.566	233.562	218.668	228.976	247.165	166.941	215.55	0.418945	0.0425957	0.0737687	163.368	218.529
ALG13	2738.88	2446.73	3196.76	2272.11	2769.17	1872.31	2008.37	1290.92	1461	1264.89	1562.12	2497.44	2550.85	1808.61	-0.581586	1.73872e-06	7.50022e-06	2684.73	1812.95
ALG14	60.8217	74.3071	65.4308	70.9564	61.7752	106.545	78.0858	77.2777	63.3599	173.968	61.0603	55.8808	111.612	101.258	0.455141	0.0451184	0.0776278	66.6582	92.1164
ALG1L	1.90068	0.900692	3.84887	5.28398	1.26072	0	0	0	3.72705	2.41623	0	9.67167	1.90789	0	-0.701363	0.502772	0.59271	2.63899	1.9692
ALG1L2	4.43492	7.65588	14.8456	12.0777	5.67324	4.78852	2.08229	6.33424	2.4847	13.2892	16.9612	10.7463	1.90789	5.01279	-0.56673	0.287504	0.376616	8.93747	7.06746
ALG1L9P	25.9759	43.2332	25.8424	21.8908	17.6501	22.7455	16.6583	8.86793	4.9694	4.83245	6.78447	19.3433	6.67763	15.0384	-1.21915	0.000779226	0.00204446	26.9185	11.7686
ALG2	641.162	770.992	840.153	825.811	820.098	395.053	471.638	373.72	434.823	544.859	332.439	509.375	678.256	411.048	-0.768609	1.28016e-11	1.22489e-10	779.643	461.246
ALG3	193.236	247.24	226.533	225.702	193.52	164.007	226.969	215.364	168.96	271.825	156.043	125.732	296.677	191.488	-0.141212	0.201306	0.279488	217.246	201.896
ALG5	399.143	515.196	461.315	448.384	456.38	464.487	372.73	437.062	270.833	687.416	252.722	329.911	352.96	398.015	-0.201937	0.306197	0.396672	456.083	396.237
ALG6	1027	1061.47	931.976	1144.36	982.73	1295.3	992.211	1149.03	1151.66	1257.65	1346.72	1058.51	1230.59	804.051	0.143236	0.305484	0.395883	1029.51	1142.86
ALG8	396.608	516.997	438.221	458.197	443.143	359.139	364.401	305.31	289.468	407.134	173.004	242.866	478.881	385.985	-0.459178	0.000123638	0.000378935	450.633	334.021
ALG9	790.049	858.359	721.938	552.554	686.462	453.713	401.882	217.898	249.713	465.123	208.623	517.972	381.579	567.447	-0.925322	3.02817e-12	3.16707e-11	721.872	384.883
ALK	10.7705	6.75519	14.8456	12.8325	8.82503	13.1684	6.24687	10.1348	16.1506	8.45679	0	13.9702	24.8026	17.0435	0.0989184	0.788753	0.83879	10.8058	12.2193
ALKBH1	245.821	217.967	180.347	266.464	202.345	235.835	251.957	292.642	351.585	230.75	232.368	225.672	385.395	232.593	0.266709	0.0718791	0.116138	222.589	270.977
ALKBH2	167.893	158.972	157.804	117.003	127.963	95.7705	107.238	57.0081	81.9952	100.273	94.9826	108.538	104.934	123.315	-0.586209	4.73217e-07	2.21593e-06	145.927	97.1171
ALKBH3	341.489	396.755	346.948	317.794	368.13	269.354	336.29	212.83	206.23	225.917	193.357	203.105	333.881	222.568	-0.538675	1.45085e-06	6.34492e-06	354.223	244.837
ALKBH3-AS1	22.8081	33.3256	20.344	12.8325	16.3893	9.57705	7.28801	6.33424	13.6659	3.62434	5.08835	13.9702	14.3092	16.0409	-1.08196	0.00013554	0.000412947	21.1399	9.98868
ALKBH4	145.719	83.7643	114.366	93.602	171.458	336.394	405.005	374.987	444.762	231.958	729.331	381.494	306.217	341.872	1.66446	1.01307e-11	9.83706e-11	121.782	394.669
ALKBH5	1711.24	1544.24	1796.87	1887.14	1744.2	1965.69	2289.48	2294.26	1829.98	1861.7	2450.89	2110.57	1375.59	1670.26	0.17387	0.16422	0.23579	1736.74	1983.16
ALKBH6	608.851	518.798	525.646	579.729	593.168	682.365	697.567	734.771	812.498	591.975	673.359	783.405	629.605	716.828	0.314414	0.00105686	0.00269073	565.238	702.486
ALKBH7	19.0068	29.7228	16.4952	12.8325	23.3233	25.1397	42.6869	49.407	26.0894	36.2434	40.7068	44.0598	9.53947	25.0639	0.609677	0.0731781	0.117956	20.2761	33.2152
ALKBH8	669.673	948.879	780.221	719.377	722.392	287.311	318.59	244.501	193.807	305.652	145.866	413.732	471.25	581.483	-1.27094	1.54263e-20	5.33683e-19	768.108	329.133
ALMS1	1613.04	1819.85	1673.16	1582.93	1608.05	634.479	634.057	552.345	408.733	664.462	334.135	1120.84	682.072	950.424	-1.35717	4.56359e-25	2.73427e-23	1659.41	664.616
ALMS1-IT1	106.438	122.944	157.804	164.558	184.065	77.8135	68.7155	84.8788	36.0282	76.1111	72.9331	97.7913	30.5263	90.2302	-1.09095	1.54392e-06	6.721e-06	147.162	70.5587
ALMS1P	10.137	9.00692	3.84887	3.77427	8.82503	8.37992	6.24687	8.86793	99.3881	7.24868	1.69612	12.8956	20.0329	56.1432	1.75272	0.0103425	0.0210293	7.11841	24.5444
ALOX12	786.248	589.052	399.183	702.77	723.022	1187.55	852.697	1432.8	742.926	1656.32	1390.82	707.106	1237.27	971.478	0.80288	0.000143751	0.000435796	640.055	1131
ALOX12-AS1	176.763	180.589	138.559	164.558	158.22	183.161	138.472	188.76	168.96	198.13	201.838	155.821	158.355	199.509	0.104431	0.414592	0.508219	163.738	177.001
ALOX12B	10.7705	20.2656	11.5466	6.03884	6.3036	11.9713	7.28801	5.06739	6.21175	3.62434	3.39224	8.59704	4.76973	4.01023	-0.814354	0.0527887	0.0889632	10.985	6.10356
ALOX12P2	51.9519	56.7436	47.836	36.9879	41.6037	40.7025	21.864	25.3369	36.0282	21.746	39.0107	82.7465	54.375	45.1151	-0.225738	0.458455	0.551347	47.0246	40.7694
ALOX15	475.803	228.325	272.72	153.99	1047.03	0	66.6332	7.60108	4.9694	3.62434	23.7457	2.14926	0	0	-5.15837	8.73654e-06	3.33467e-05	435.573	12.0803
ALOX15B	19.6403	17.5635	22.5434	26.4199	22.0626	1112.13	279.027	146.954	357.797	532.778	1219.51	1150.93	928.19	27.069	4.85838	5.16358e-09	3.31548e-08	21.6459	639.376
ALOX15P1	55.7532	67.1015	28.0418	30.1942	21.4322	31.1254	31.2343	13.9353	17.3929	13.2892	6.78447	41.9106	19.0789	29.0742	-0.862191	0.00350469	0.00797468	40.5046	22.6473
ALOX5	8933.82	3558.18	5415.36	7127.34	8375.59	24841.7	20463.7	36482.7	41680.9	26277.7	47683	22611.3	16583.4	19322.3	2.0314	5.63346e-84	5.34981e-80	6682.06	28438.5
ALOX5AP	13539.8	3420.83	7423.92	12412.1	11848.2	45554.4	36428.6	30230.8	47859.1	37701.6	68441.8	38099.9	38977.3	20893.3	2.07904	1.27659e-16	2.59041e-15	9728.97	40465.2
ALOXE3	8.86983	4.05311	4.94855	6.03884	0.63036	4.78852	5.20572	1.26685	0	0	1.69612	2.14926	2.86184	8.02046	-0.872627	0.240325	0.324343	4.90814	2.88764
ALPK1	7170.63	1827.05	3093.39	6423.06	4191.89	16553.9	11047.6	24644	30450	18029.9	28584.7	14126	12663.6	17047.5	2.09835	8.51633e-26	5.61634e-24	4541.2	19238.6
ALPK2	23.4417	34.2263	31.8906	53.5947	91.4021	13.1684	2.08229	12.6685	11.1812	1.20811	3.39224	32.2389	8.58552	4.01023	-2.34585	9.39923e-06	3.56398e-05	46.9111	9.83726
ALPK3	63.356	37.8291	57.733	58.1238	61.7752	380.688	82.2504	288.841	286.983	291.155	239.153	243.941	81.0855	214.547	2.0229	1.57589e-12	1.73412e-11	55.7634	234.294
ALPL	5691.9	349.018	1493.36	4859	2419.95	6288.53	7381.71	22098.9	20321.1	9047.56	29392	5417.21	5087.4	11373	2.17727	2.85645e-08	1.63855e-07	2962.65	12934.2
ALS2	1358.99	1047.05	918.23	1414.6	943.648	1206.71	1033.86	905.796	1023.7	955.617	1029.54	1035.94	832.796	848.163	-0.204103	0.0674779	0.109924	1136.5	985.791
ALS2CL	616.454	488.625	417.877	219.663	207.388	102.953	272.78	148.221	63.3599	71.2786	47.4913	135.403	151.678	325.831	-1.46321	0.000756697	0.00199113	390.001	146.555
ALS2CR11	31.678	30.6235	28.0418	23.4005	37.1912	22.7455	18.7406	5.06739	6.21175	13.2892	6.78447	9.67167	31.4802	20.0511	-1.14543	0.000330685	0.000930475	30.187	14.8936
ALS2CR12	207.808	157.621	172.649	176.636	146.243	155.627	147.843	140.62	94.4187	123.227	128.905	175.165	133.553	178.455	-0.276942	0.0579056	0.0964146	172.191	141.979
ALX3	160.291	142.309	162.752	147.952	145.613	167.598	157.213	186.227	212.442	158.263	186.573	161.194	143.092	212.542	0.208875	0.128967	0.1918	151.783	176.127
ALX4	0	1.80138	1.09968	2.26456	1.26072	2.39426	0	0	6.21175	0	1.69612	5.37315	1.90789	2.00511	0.760569	0.423719	0.517537	1.28527	2.17648
ALYREF	226.181	257.148	338.151	271.748	275.467	317.24	666.332	680.297	637.326	654.797	744.596	554.509	246.118	487.243	0.957044	3.18363e-05	0.000108675	273.739	554.273
AMACR	5.06848	0.900692	0	1.50971	0.63036	0	1.04114	0	0	0	3.39224	0	2.86184	2.00511	-0.705052	0.563733	0.649066	1.62185	1.03337
AMBN	0	4.95381	5.49839	3.77427	0	5.98565	1.04114	1.26685	0	3.62434	0	26.8657	3.81579	7.0179	0.334608	0.752408	0.809201	2.84529	5.51305
AMBRA1	729.227	795.761	831.356	759.384	757.692	519.555	593.452	689.165	865.919	785.273	561.415	659.823	727.862	1136.9	-0.0909277	0.560776	0.646403	774.684	726.596
AMD1	7967.01	6411.57	7526.19	8217.35	6850.12	9888.3	6026.14	6439.38	6836.66	5355.56	5107.01	4765.98	8067.53	6499.58	-0.187324	0.176503	0.250323	7394.45	6554.02
AMDHD1	53.8526	66.6512	54.9839	26.4199	52.9502	52.6738	42.6869	39.2723	116.781	48.3245	100.071	50.5076	78.2236	33.0844	0.232464	0.450217	0.542986	50.9715	62.4028
AMDHD2	13.9383	27.0208	19.7942	13.5874	17.6501	53.8709	79.127	70.9434	54.6634	57.9894	100.071	56.9554	20.0329	37.0946	1.5966	0.000728832	0.0019242	18.3981	58.972
AMER1	539.159	760.634	625.166	537.457	524.459	216.681	237.381	209.03	175.171	210.212	188.269	293.374	346.283	387.99	-1.24938	1.45011e-28	1.3771e-26	597.375	251.599
AMFR	1562.36	1751.85	1997.01	1608.6	1823	1193.54	1605.44	1306.12	1380.25	1330.13	965.091	1444.3	1891.68	1110.83	-0.374578	0.00167141	0.00407877	1748.56	1358.6
AMH	0	1.80138	0	1.50971	5.67324	1.19713	1.04114	0	1.24235	7.24868	0	4.29852	0	4.01023	0.0366893	0.975733	0.982861	1.79687	2.11534
AMHR2	6.96916	0	4.39871	0	4.41252	8.37992	5.20572	8.86793	6.21175	14.4974	16.9612	2.14926	2.86184	4.01023	1.17945	0.0586765	0.0975272	3.15608	7.6828
AMICA1	41426.6	14449.3	23194.4	34507.4	35236.5	51057.6	41635.4	76411.1	42459.8	42975	71944.2	24185.6	30162.8	34438.8	0.588492	0.00246375	0.00579206	29762.8	46141.2
AMIGO1	523.32	445.392	363.993	396.299	210.54	93.3762	124.937	24.0701	34.7858	39.8677	61.0603	84.8958	163.125	143.366	-2.30825	7.7071e-13	8.83943e-12	387.909	85.4982
AMIGO2	570.837	688.129	578.98	627.284	504.288	739.827	583.041	891.86	1459.76	695.873	417.245	339.583	675.394	886.261	0.298049	0.272698	0.360629	593.904	743.205
AMIGO3	33.5787	44.1339	31.3408	33.2136	35.3001	47.8852	62.4687	57.0081	75.7834	45.9083	54.2758	68.7763	30.5263	60.1534	0.649563	0.0281794	0.0511625	35.5134	55.8651
AMMECR1	1756.23	1655.47	1758.93	1509.71	1763.75	1139.67	1119.23	771.51	899.462	933.871	983.749	1320.72	751.71	1460.73	-0.704886	6.7177e-10	4.97037e-09	1688.82	1042.29
AMMECR1L	1205.03	1075.88	1242.64	1350.44	1267.65	1283.32	1494.04	1610.16	1510.7	1389.33	1580.78	1270.21	1677.99	1241.17	0.230037	0.00386255	0.00870655	1228.33	1450.86
AMN1	939.569	542.216	594.375	615.962	548.413	3314.86	1503.41	2491.89	3200.3	2909.14	2669.69	1560.36	1937.47	1293.3	1.81082	1.08621e-13	1.40753e-12	648.107	2320.05
AMOT	243.92	262.552	289.765	181.165	221.887	94.5733	93.703	20.2696	32.3011	45.9083	120.424	109.612	89.671	80.2046	-1.68952	8.83656e-10	6.40583e-09	239.858	76.2964
AMOTL1	62.7224	142.309	127.563	97.3763	101.488	70.6307	69.7567	72.2103	109.327	96.649	74.6292	64.4778	159.309	72.1841	-0.278377	0.279968	0.368401	106.292	87.686
AMPD1	0.63356	0.900692	3.29903	1.50971	0	13.1684	1.04114	5.06739	3.72705	7.24868	10.1767	1.07463	2.86184	9.02302	2.165	0.0057378	0.0124008	1.2686	5.9321
AMPD2	7251.09	4123.82	8202.49	8662.72	11001.7	5174	11442.2	5823.7	5542.13	7961.46	18855.7	17299.4	1898.35	8344.28	0.0447223	0.897502	0.924919	7848.36	9149.03
AMPD3	2843.42	1450.56	1702.3	2677.47	2101.62	3047.9	2893.34	3652.32	4041.37	2265.21	2679.87	1753.8	2327.63	2989.63	0.385708	0.0204588	0.0385642	2155.07	2850.12
AMPH	38.0136	57.1939	39.5884	35.4782	36.5609	629.691	419.581	244.501	559.058	427.672	1394.21	867.226	963.486	47.1202	3.88947	1.90584e-15	3.1836e-14	41.367	616.949
AMT	608.851	592.655	544.34	511.037	534.545	673.985	762.118	458.599	829.89	582.31	722.546	553.434	729.769	622.588	0.244533	0.0998136	0.153964	558.286	659.471
AMY2B	2378.38	2099.96	1665.46	1716.54	1691.25	4087.01	3066.17	2600.84	3897.25	3263.11	3619.52	2573.74	2360.06	1911.88	0.651479	5.05109e-05	0.000166036	1910.32	3042.18
AMZ1	10.7705	8.55657	10.9968	14.3422	10.0858	3.59139	7.28801	3.80054	7.45411	2.41623	0	10.7463	2.86184	8.02046	-1.14224	0.0101999	0.0207616	10.9504	5.13099
AMZ2	1708.08	1587.47	1805.12	1780.7	1996.35	2903.04	2372.77	2175.18	2223.81	1969.22	2578.1	2645.74	2197.89	1536.92	0.36459	0.00186286	0.00449744	1775.54	2289.19
AMZ2P1	804.621	562.482	872.594	812.224	578.04	802.078	611.152	727.17	634.841	685	747.988	957.495	494.145	536.368	-0.0889147	0.528911	0.616847	725.992	688.471
ANAPC1	2069.84	2359.36	2275.78	1916.58	2172.85	1142.06	1137.97	713.235	862.192	1203.28	519.012	1338.99	1233.45	1310.34	-1.05839	1.29251e-24	7.37198e-23	2158.88	1051.17
ANAPC10	133.048	154.919	149.556	142.668	121.029	94.5733	92.6619	100.081	63.3599	84.5679	88.1981	65.5524	125.921	77.1969	-0.689544	6.71329e-08	3.62129e-07	140.244	88.0125
ANAPC11	103.27	87.3671	77.5272	76.2403	124.811	125.699	173.871	177.359	187.595	154.638	142.474	123.582	124.013	138.353	0.657672	0.000423808	0.00116929	93.8432	149.732
ANAPC13	1309.57	732.713	1007.85	975.273	1039.46	1373.11	1994.83	1994.02	1631.21	1413.49	1801.28	1008	1374.64	951.427	0.541448	0.000249208	0.000716611	1012.97	1504.67
ANAPC15	133.681	139.157	140.759	150.971	150.026	169.993	169.707	212.83	152.809	158.263	274.771	232.12	151.678	149.381	0.353589	0.0030026	0.00693018	142.919	185.728
ANAPC16	4534.39	4301.7	4409.71	4064.14	3452.48	4381.5	4112.52	3263.4	3133.21	3000.95	3929.91	4827.24	4400.56	2747.01	-0.140024	0.223399	0.305232	4152.48	3755.14
ANAPC1P1	51.3183	69.8036	40.1382	40.7622	118.508	11.9713	24.9875	0	4.9694	18.1217	23.7457	26.8657	15.2632	16.0409	-2.14127	1.77e-05	6.34652e-05	64.106	15.7739
ANAPC2	259.126	269.757	228.733	180.41	235.124	289.706	281.109	363.585	329.223	273.033	306.997	336.359	249.934	361.923	0.407513	0.096959	0.150207	234.63	310.208
ANAPC4	3312.25	3254.2	3096.69	2740.12	3081.83	3887.08	3355.61	3557.31	2830.08	3311.44	2545.87	2790.81	2552.76	2734.98	-0.0192632	0.864915	0.899734	3097.02	3062.88
ANAPC5	4791.61	5333.9	4783.05	4810.69	5266.02	4149.26	4680.99	3767.6	3231.35	4444.65	3336.26	3950.34	3591.61	3767.61	-0.361384	0.000137269	0.000417546	4997.05	3879.96
ANAPC7	1250.01	1289.79	1209.64	1258.34	1095.56	1575.42	1507.58	1454.34	1346.71	1487.19	1328.06	1442.15	1645.56	1274.25	0.252554	0.00647103	0.0138188	1220.67	1451.25
ANG	17.1061	19.8152	12.6463	20.3811	32.1483	104.15	71.839	59.5418	91.934	67.6543	27.1379	13.9702	100.164	21.0537	1.45508	1.08989e-05	4.08531e-05	20.4194	61.9384
ANGEL1	693.748	1003.82	723.588	670.311	613.34	477.655	504.955	247.035	262.136	345.52	239.153	554.509	611.48	341.872	-0.914479	1.41498e-14	2.08654e-13	740.961	398.257
ANGEL2	2865.59	2803.85	2649.67	2390.63	2453.36	2361.94	2149.96	2062.43	2124.42	2104.53	1982.76	2640.37	2379.14	2080.31	-0.248286	0.000435461	0.00120005	2632.62	2209.54
ANGPT1	613.919	198.152	320.006	416.68	249.622	307.663	307.138	134.286	166.475	282.698	907.423	63.4032	107.796	45.1151	-0.7048	0.16863	0.241102	359.676	258
ANGPT2	31.678	22.0669	25.8424	25.6651	30.8876	13.1684	22.9052	10.1348	12.4235	15.7055	13.5689	13.9702	18.125	26.0665	-0.741271	0.00451027	0.0100074	27.228	16.2298
ANGPT4	22.8081	21.1663	17.5948	18.1165	22.6929	41.8996	16.6583	11.4016	26.0894	14.4974	25.4418	15.0448	12.4013	20.0511	-0.0301247	0.928877	0.948912	20.4757	20.3873
ANGPTL1	97.5682	50.8891	92.3729	42.2719	71.861	81.4049	64.551	31.6712	142.87	61.6137	137.386	297.672	30.5263	103.263	0.371245	0.193349	0.269783	70.9926	105.662
ANGPTL2	4.43492	3.60277	1.64952	7.54855	3.78216	4.78852	1.04114	6.33424	12.4235	12.0811	6.78447	7.52241	0	2.00511	0.324896	0.52528	0.613268	4.20358	5.88673
ANGPTL3	4.43492	8.55657	6.59806	9.81311	9.45539	5.98565	4.16458	0	2.4847	0	0	4.29852	0.953947	5.01279	-1.81682	0.00120547	0.00303331	7.77161	2.54447
ANGPTL4	6.3356	6.75519	7.69774	3.77427	1.26072	8.37992	5.20572	16.469	12.4235	1.20811	3.39224	3.22389	11.4474	6.01534	0.373741	0.522397	0.610615	5.1647	7.52946
ANGPTL6	12.6712	22.9676	21.9935	12.8325	25.8447	14.3656	11.4526	11.4016	24.847	14.4974	11.8728	30.0896	7.63158	13.0332	-0.359306	0.378705	0.471717	19.2619	15.4657
ANGPTL7	1.26712	1.35104	3.29903	2.26456	3.1518	0	2.08229	3.80054	8.69646	2.41623	6.78447	7.52241	1.90789	4.01023	0.758111	0.170392	0.243163	2.26671	4.13561
ANK1	160.291	169.78	154.505	160.784	199.194	201.118	291.52	314.178	116.781	339.48	259.506	104.239	245.164	203.519	0.418847	0.223668	0.305489	168.911	230.612
ANK2	32.3115	22.0669	8.24758	1.50971	0	0	0	0	113.054	0	3.39224	3.22389	1.90789	6.01534	-1.01113	0.433398	0.526919	12.8272	14.177
ANK3	681.71	899.791	986.41	744.287	565.432	247.806	414.375	95.0135	99.3881	137.725	184.877	228.896	253.75	525.34	-1.7413	4.90061e-08	2.68932e-07	775.526	243.019
ANKAR	306.009	339.561	268.321	267.219	255.926	205.907	150.966	106.415	115.539	111.146	164.523	248.239	171.71	139.355	-0.883224	5.00377e-13	5.91024e-12	287.407	157.089
ANKDD1A	641.162	920.057	721.938	1204.75	1060.26	1337.2	881.849	1164.23	2094.6	2111.78	1767.36	931.704	1419.47	909.319	0.578614	0.014986	0.0292949	909.634	1401.95
ANKDD1B	44.9827	50.4387	35.7395	30.1942	73.7521	43.0967	35.3989	30.4043	22.3623	49.5326	47.4913	30.0896	58.1908	47.1202	-0.197695	0.515641	0.604635	47.0214	40.4096
ANKEF1	129.88	116.64	115.466	117.003	114.725	52.6738	67.6744	22.8032	37.2705	48.3245	32.2262	35.4628	86.8092	64.1637	-1.3224	7.07887e-07	3.23818e-06	118.743	49.712
ANKFY1	4342.42	4073.38	4400.36	4341.17	4391.08	4133.69	4181.24	6403.91	8274.06	5443.76	4077.47	5099.12	5369.77	8469.6	0.401256	0.0163541	0.0316598	4309.68	5716.96
ANKH	2523.47	2614.26	2358.81	1882.61	2012.74	1189.95	1162.96	912.13	1006.3	890.379	848.059	1588.3	1270.66	1283.27	-1.01154	1.25767e-28	1.20035e-26	2278.38	1128
ANKHD1	506.848	372.886	352.447	465.745	399.018	803.275	665.291	728.437	616.206	669.294	922.688	629.733	433.092	630.609	0.669393	3.15776e-09	2.09851e-08	419.389	677.625
ANKHD1-EIF4EBP3	53.8526	44.5842	27.4919	36.9879	52.9502	136.473	69.7567	84.8788	110.569	86.9841	113.64	67.7017	45.7895	92.2353	1.01689	5.80509e-07	2.6918e-06	43.1734	89.7809
ANKIB1	3139.92	3168.63	3219.85	3212.66	3164.4	2115.33	1972.97	2052.29	2441.22	2183.06	1672.37	2372.78	2988.72	2537.47	-0.498856	3.5743e-08	2.01624e-07	3181.1	2259.58
ANKK1	28.5102	19.3649	20.344	13.5874	6.93395	7.18279	15.6172	6.33424	19.8776	4.83245	5.08835	13.9702	11.4474	28.0716	-0.490346	0.322405	0.413746	17.7481	12.4913
ANKLE1	67.1573	71.1547	80.2764	77.7501	70.6003	94.5733	66.6332	167.224	109.327	90.6084	59.3641	54.8061	92.5329	146.373	0.383738	0.0726763	0.117326	73.3877	97.938
ANKLE2	3079.1	3052.44	2994.97	2931.86	2979.71	3281.34	3701.27	3026.5	3232.6	3132.64	3580.51	4131.95	3018.29	2855.28	0.146271	0.0649147	0.106168	3007.62	3328.93
ANKMY1	240.753	309.388	223.234	218.153	310.767	160.416	147.843	135.553	178.899	125.644	118.728	233.195	218.454	226.578	-0.606072	9.54793e-05	0.000298508	260.459	171.701
ANKMY2	682.344	777.297	769.774	618.226	754.54	658.422	618.44	571.348	545.392	514.656	466.433	571.703	625.789	671.713	-0.299894	0.000143505	0.000435121	720.436	582.655
ANKRA2	1511.04	1677.99	1677.01	1657.66	1766.9	1169.6	1508.62	1342.86	1469.7	1325.3	1782.62	2004.18	1423.29	1448.7	-0.149576	0.207853	0.287131	1658.12	1497.21
ANKRD1	0	0.900692	0	0	0	2.39426	1.04114	0	11.1812	1.20811	0	0	0	5.01279	3.38651	0.0650318	0.106317	0.180138	2.31527
ANKRD10	4736.49	5338.85	4461.94	4815.97	4183.7	5493.63	4764.28	6211.35	5216.63	4716.47	6116.2	6115.72	3245.33	5805.81	0.139459	0.255892	0.341807	4707.39	5298.38
ANKRD11	3798.82	3300.59	3332.57	3484.41	3193.4	3444.15	3124.47	2977.09	3681.09	3667.83	5146.02	4586.52	3293.98	3747.56	0.119037	0.281561	0.370153	3421.96	3740.97
ANKRD12	13855.3	10500.7	10886.8	12842.3	11275.2	10407.9	7795.05	9868.74	10223.3	8667	12517.4	12569.9	8230.65	10376.5	-0.245276	0.0222636	0.0415663	11872.1	10072.9
ANKRD13A	13869.3	7573.92	10683.9	12870.3	14643.3	19770.6	21166.5	23408.8	26520.5	19149.8	30906.7	19152.1	13843.7	16888.1	0.80858	1.9252e-19	5.68667e-18	11928.1	21200.7
ANKRD13B	13.3048	13.9607	9.89709	23.4005	31.518	14.3656	27.0698	5.06739	7.45411	14.4974	30.5301	31.1643	11.4474	24.0614	-0.0827129	0.823499	0.867148	18.4162	18.4064
ANKRD13C	1237.34	1314.11	1192.6	1193.43	1107.54	683.562	631.975	561.213	611.237	564.189	471.521	827.465	1055.07	707.805	-0.84212	5.42799e-12	5.52782e-11	1209	679.337
ANKRD13D	968.079	853.405	908.883	876.387	1136.54	2722.28	3319.17	4304.75	4662.54	2870.48	4438.74	2391.05	1491.97	2736.98	1.68577	4.16988e-13	4.97166e-12	948.659	3215.33
ANKRD16	82.9963	96.374	59.9324	46.801	30.8876	43.0967	45.8104	25.3369	43.4823	45.9083	23.7457	56.9554	62.0066	37.0946	-0.553065	0.0241328	0.0446001	63.3983	42.6041
ANKRD17	5413.77	5229.87	5433.5	5322.48	5223.16	4357.56	3573.21	4787.42	5296.14	4631.9	4489.62	5623.54	6199.7	5636.38	-0.101159	0.386634	0.479831	5324.56	4955.05
ANKRD18A	57.6539	112.136	67.6301	157.765	80.686	56.2652	165.542	74.744	103.115	32.619	128.905	39.7613	29.5724	88.225	-0.305904	0.484102	0.575486	95.1742	79.861
ANKRD18DP	2.53424	19.8152	10.9968	18.1165	3.78216	26.3369	30.1932	24.0701	23.6047	21.746	20.3534	67.7017	22.8947	4.01023	1.26967	0.0288723	0.0522807	11.049	26.7679
ANKRD19P	72.2258	82.4133	114.916	82.2792	41.6037	93.3762	123.896	65.876	69.5717	111.146	101.767	62.3285	90.625	99.2532	0.217191	0.327931	0.419457	78.6877	90.8711
ANKRD2	5.06848	1.35104	0.549839	3.77427	6.93395	16.7598	21.864	25.3369	39.7552	28.9947	44.0991	13.9702	12.4013	24.0614	2.82945	7.27201e-13	8.37075e-12	3.53552	25.2492
ANKRD20A11P	20.9075	11.709	43.4372	38.4976	17.0197	5.98565	12.4937	1.26685	1.24235	3.62434	3.39224	33.3135	2.86184	24.0614	-2.07576	2.90546e-05	9.98434e-05	26.3142	9.80466
ANKRD20A12P	3.1678	21.1663	4.94855	3.77427	2.52144	4.78852	0	0	7.45411	1.20811	3.39224	2.14926	0	0	-2.03082	0.0208922	0.0393032	7.11566	2.11025
ANKRD20A4	44.9827	30.1732	1.64952	41.517	0	39.5053	108.279	0	1.24235	8.45679	0	47.2837	18.125	20.0511	-1.49089	0.203303	0.28187	23.6645	26.9937
ANKRD20A5P	219.212	215.265	174.849	301.942	193.52	52.6738	66.6332	30.4043	32.3011	50.7407	72.9331	262.21	101.118	85.2174	-1.62917	2.82304e-11	2.55811e-10	220.958	83.8035
ANKRD20A8P	1.26712	0	1.09968	0.754855	0	2.39426	2.08229	0	1.24235	0	8.48059	0	0.953947	0	1.08774	0.354023	0.446041	0.62433	1.68372
ANKRD20A9P	3.80136	1.35104	2.74919	1.50971	3.1518	1.19713	1.04114	1.26685	22.3623	0	3.39224	7.52241	2.86184	3.00767	0.850613	0.28503	0.373865	2.51262	4.73907
ANKRD22	279.4	65.3002	246.878	301.942	329.048	913.411	649.674	3563.64	4677.45	1870.16	1458.66	855.405	1768.62	2852.28	3.02835	4.32779e-13	5.14701e-12	244.513	2067.7
ANKRD23	99.4689	113.487	101.17	97.3763	119.138	73.025	84.3327	57.0081	74.5411	74.903	66.1486	85.9704	63.9144	101.258	-0.48493	0.000739417	0.00195052	106.128	75.678
ANKRD24	15.2054	19.3649	18.6945	6.03884	20.1715	32.3225	20.8229	10.1348	39.7552	13.2892	1.69612	27.9404	26.7105	35.0895	0.527134	0.166149	0.238055	15.895	23.0846
ANKRD26	622.789	666.512	637.813	644.646	555.977	344.774	346.701	291.375	508.122	425.256	342.616	461.016	553.289	485.238	-0.578615	3.85041e-05	0.000129527	625.547	417.598
ANKRD26P1	0	0.900692	0.549839	0.754855	1.26072	16.7598	3.12343	2.53369	3.72705	1.20811	5.08835	3.22389	0	0	2.4407	0.0175116	0.0335686	0.693221	3.96271
ANKRD27	1214.53	949.329	912.182	952.627	946.17	957.705	1074.46	1238.98	1119.36	1005.15	1253.43	1478.69	1405.16	916.337	0.222508	0.0867979	0.136402	994.968	1161.03
ANKRD28	2944.15	2420.61	2379.15	2414.03	2211.3	2525.95	3306.67	1511.35	1688.35	2550.33	3670.4	2199.77	2698.72	3044.77	0.0606512	0.737212	0.796285	2473.85	2577.37
ANKRD29	8.23628	10.8083	2.19935	0.754855	10.0858	1.19713	3.12343	6.33424	2.4847	2.41623	6.78447	1.07463	1.90789	4.01023	-1.16333	0.107526	0.164141	6.41691	3.25922
ANKRD30B	3.1678	0	0.549839	9.81311	0.63036	0	1.04114	0	0	0	0	5.37315	2.86184	0	-1.88059	0.192331	0.268559	2.83222	1.03068
ANKRD30BL	4.43492	2.25173	3.84887	0	0	1.19713	0	0	0	0	0	19.3433	4.76973	0	-0.681903	0.667273	0.738636	2.1071	2.81224
ANKRD31	55.1197	42.3325	37.9389	48.3107	23.9537	17.957	17.6995	2.53369	11.1812	4.83245	5.08835	5.37315	20.0329	28.0716	-1.80561	3.89308e-05	0.000130823	41.5311	12.53
ANKRD32	781.813	555.727	592.726	702.015	833.335	1193.54	927.66	994.475	1205.08	1289.06	1730.04	1368	1324.08	889.268	0.810795	4.43412e-07	2.08304e-06	693.123	1213.47
ANKRD33B	681.077	379.642	492.105	602.374	995.968	926.579	671.538	1131.29	1894.59	1355.5	1131.31	541.613	865.23	1634.17	0.829343	0.00235948	0.00556621	630.233	1127.98
ANKRD34A	92.4997	65.7505	74.778	72.4661	54.8413	122.107	84.3327	39.2723	140.386	73.6949	103.463	99.9406	114.474	49.1253	0.354949	0.176789	0.250616	72.0671	91.8662
ANKRD34B	155.856	5.40415	62.6816	8.3034	126.702	177.175	298.808	220.431	603.783	439.753	291.732	10.7463	703.059	349.892	1.91081	0.00662211	0.0141081	71.7894	343.931
ANKRD35	6.3356	12.1593	0	6.79369	14.4983	10.7742	8.32916	10.1348	13.6659	4.83245	1.69612	2.14926	22.8947	3.00767	-0.143346	0.798096	0.846385	7.95738	8.60936
ANKRD36	2589.36	2597.14	2858.06	2284.95	2352.5	650.042	760.035	352.183	489.486	569.021	561.415	1661.38	580.954	1084.77	-1.86868	1.54637e-46	1.5458e-43	2536.4	745.476
ANKRD36B	1076.42	796.662	801.115	949.608	997.229	223.863	483.091	149.488	192.564	231.958	149.258	557.733	331.02	376.962	-1.74995	1.09311e-15	1.90647e-14	924.206	299.549
ANKRD36BP1	2050.83	2075.64	2071.79	2186.81	2060.65	933.762	1058.84	1688.71	1631.21	1225.03	876.893	1617.32	961.579	2863.3	-0.54681	0.024493	0.0451822	2089.15	1428.52
ANKRD36BP2	216.044	145.912	218.286	265.709	83.2075	292.1	155.131	44.3396	73.2987	426.464	67.8447	1057.44	159.309	351.898	0.251612	0.612508	0.691146	185.832	291.98
ANKRD36C	589.21	766.038	754.378	682.389	706.633	173.584	199.9	108.949	180.141	149.806	98.3749	384.717	162.171	337.862	-1.8766	2.35957e-31	3.31966e-29	699.73	199.501
ANKRD37	12.6712	30.1732	25.2926	21.1359	27.1055	8.37992	18.7406	20.2696	23.6047	7.24868	10.1767	29.015	10.4934	16.0409	-0.544643	0.0795402	0.126652	23.2757	15.9966
ANKRD39	24.7088	38.2794	36.2893	32.4588	29.6269	25.1397	44.7692	20.2696	31.0588	26.5785	22.0495	32.2389	18.125	43.11	-0.128742	0.629874	0.706168	32.2726	29.2599
ANKRD40	1283.59	1704.56	1630.82	1471.21	1400.03	863.131	968.264	852.588	744.168	763.527	549.542	847.883	1526.32	1009.58	-0.757006	4.51845e-15	7.1695e-14	1498.04	902.777
ANKRD42	699.45	523.302	603.173	652.95	707.263	596.171	686.114	537.143	464.639	411.966	873.501	587.823	465.526	1078.75	-0.0193898	0.939262	0.956412	637.228	633.515
ANKRD44	19404.7	14129.2	17254.5	17641	18444.9	19395.9	14166.9	18153.9	17161.8	16488.3	21252.4	18794.2	12785.8	13574.6	-0.0588683	0.426758	0.520345	17374.8	16863.8
ANKRD44-IT1	304.109	189.145	221.585	215.889	279.88	536.315	381.059	452.264	362.766	276.658	374.842	320.24	115.428	229.586	0.439777	0.0306301	0.055122	242.121	338.795
ANKRD45	0.63356	0.450346	2.19935	0	0.63036	25.1397	6.24687	21.5364	7.45411	51.9488	11.8728	34.3882	31.4802	57.1458	5.30484	3.086e-08	1.75908e-07	0.782724	27.4681
ANKRD46	541.693	523.302	410.18	384.976	320.853	210.695	163.46	98.8141	108.085	100.273	128.905	182.687	214.638	177.453	-1.50478	3.99504e-19	1.13589e-17	436.201	153.89
ANKRD49	3706.96	3455.5	3252.84	2995.26	3083.72	1788.51	2118.73	1784.99	2197.72	2071.91	2250.75	2952.01	1998.52	2434.21	-0.596633	1.15311e-11	1.11117e-10	3298.86	2177.48
ANKRD50	873.679	940.322	755.478	1207.77	1053.96	885.877	588.247	941.267	1246.08	843.263	581.769	653.375	1819.18	716.828	-0.143542	0.430663	0.524231	966.242	919.542
ANKRD52	3266	3421.28	3336.42	3133.4	3394.49	2561.86	2789.23	2662.91	2587.82	2520.12	2159.16	3834.28	2425.89	3129.98	-0.272588	0.00576292	0.0124466	3310.32	2741.25
ANKRD53	12.0376	5.40415	8.24758	10.568	8.19467	5.98565	6.24687	12.6685	12.4235	12.0811	3.39224	18.2687	21.9408	10.0256	0.358681	0.385712	0.478843	8.8904	11.4481
ANKRD54	165.993	196.351	197.392	144.932	167.676	199.921	366.483	181.159	175.171	166.72	189.965	168.717	144.046	203.519	0.196719	0.442888	0.536021	174.469	199.522
ANKRD55	618.988	346.316	537.742	314.775	298.16	404.63	429.993	302.776	711.867	553.316	637.74	655.524	317.664	256.655	0.136794	0.588837	0.670852	423.196	474.463
ANKRD6	368.098	166.178	199.591	266.464	299.421	463.29	355.03	480.135	515.576	582.31	693.712	289.075	384.441	211.54	0.712899	0.000137295	0.000417556	259.95	441.679
ANKRD61	143.818	166.628	179.797	95.1117	184.065	102.953	82.2504	87.4124	105.6	137.725	94.9826	185.911	127.829	168.43	-0.343527	0.045548	0.078289	153.884	121.455
ANKRD62	1.26712	0.450346	0	0.754855	0.63036	9.57705	4.16458	6.33424	6.21175	1.20811	6.78447	12.8956	0.953947	3.00767	3.11581	0.000155954	0.00046942	0.620536	5.68193
ANKRD62P1-PARP4P3	8.86983	4.50346	4.39871	1.50971	6.93395	7.18279	16.6583	2.53369	3.72705	12.0811	8.48059	6.44778	3.81579	10.0256	0.573947	0.249053	0.334295	5.24313	7.88363
ANKRD7	0	0.450346	1.09968	0.754855	1.89108	1.19713	1.04114	0	4.9694	3.62434	1.69612	0	0	2.00511	0.826788	0.456952	0.549853	0.839191	1.61481
ANKRD9	15.839	27.9214	36.8392	24.1554	29.6269	40.7025	65.5921	45.6065	31.0588	78.5273	59.3641	66.6271	36.25	28.0716	0.882218	0.000722595	0.0019088	26.8764	50.2
ANKS1A	720.357	626.431	721.388	761.649	757.692	1365.93	1225.43	1328.92	1607.6	1409.87	3148	1766.69	1645.56	929.371	1.12379	1.54143e-09	1.07436e-08	717.503	1603.04
ANKS1B	3.80136	1.35104	4.94855	6.79369	6.93395	4.78852	2.08229	1.26685	1.24235	0	0	3.22389	2.86184	0	-1.4661	0.0522784	0.0882128	4.76572	1.71842
ANKS3	64.6231	85.1154	79.7266	49.8204	68.0788	71.8279	80.1681	48.1402	55.9058	38.6596	54.2758	89.1943	45.7895	66.1688	-0.184383	0.365392	0.457998	69.4729	61.1255
ANKS6	348.458	449.896	400.282	332.891	272.315	177.175	265.492	74.744	125.477	101.481	135.689	413.732	135.46	263.673	-1.04944	4.58334e-11	4.019e-10	360.768	188.103
ANKUB1	62.0888	31.5242	53.3343	31.7039	40.9734	38.3082	61.4275	10.1348	7.45411	32.619	59.3641	19.3433	10.4934	6.01534	-0.719434	0.240781	0.324844	43.9249	27.24
ANKZF1	3043.62	2772.33	2644.17	2829.95	2551.7	5541.52	3102.61	2619.84	3197.81	3103.64	4046.94	4114.76	2971.54	1781.54	0.283488	0.122429	0.183426	2768.35	3386.69
ANLN	34.2122	34.6766	39.0385	113.228	53.5806	102.953	274.862	112.749	206.23	263.369	130.601	47.2837	168.849	146.373	1.53678	0.000838172	0.00218134	54.9472	161.474
ANO10	793.217	395.854	551.488	1054.53	775.973	1231.85	1005.75	1161.7	1200.11	823.933	1636.75	733.972	1207.7	639.632	0.586726	0.0040938	0.00917554	714.213	1071.27
ANO2	14.5719	3.15242	1.09968	14.3422	5.67324	29.9283	24.9875	21.5364	8.69646	30.2028	10.1767	4.29852	10.4934	16.0409	1.22468	0.0555283	0.0929698	7.76789	17.3734
ANO5	55.1197	79.2609	95.1221	58.8787	58.6234	38.3082	31.2343	78.5445	113.054	28.9947	20.3534	32.2389	225.131	99.2532	-0.162827	0.632044	0.708141	69.401	74.1236
ANO6	4656.03	5185.28	5294.4	6354.37	6616.88	4497.62	5286.93	4304.75	3375.47	4465.18	3504.18	3148.67	5858.19	4061.36	-0.409162	0.0117603	0.023574	5621.39	4278.04
ANO7	2.53424	7.20553	2.74919	8.3034	5.67324	3.59139	21.864	10.1348	29.8164	1.20811	23.7457	15.0448	10.4934	17.0435	1.54442	0.0144561	0.0283574	5.29312	14.7713
ANO8	153.955	200.854	155.604	172.862	173.349	113.727	178.036	121.617	135.416	146.182	84.8059	144	210.822	176.45	-0.255377	0.242629	0.326849	171.325	145.673
ANO9	404.845	433.683	414.578	312.51	287.444	259.777	473.721	211.563	166.475	146.182	281.556	283.702	162.171	499.274	-0.433328	0.171517	0.244511	370.612	276.047
ANOS1	35.4793	4.95381	2.74919	10.568	11.3465	96.9676	26.0286	26.6038	103.115	32.619	74.6292	13.9702	13.3553	13.0332	1.68796	0.000705535	0.00186867	13.0194	44.4802
ANP32A	22786	10392.6	14988.6	21246.9	18919	41411.2	36682.6	36666.4	37244.4	33759.5	64817.2	24019.1	28870.3	29115.3	1.04665	1.89642e-13	2.36343e-12	17666.6	36954
ANP32A-IT1	774.843	511.593	579.53	945.078	624.056	1084.6	474.762	818.383	1002.58	674.127	1438.31	1306.75	535.164	651.662	0.312307	0.0879975	0.138093	687.02	887.37
ANP32AP1	4.43492	2.70208	1.09968	2.26456	6.3036	11.9713	11.4526	10.1348	6.21175	8.45679	28.834	5.37315	12.4013	6.01534	1.67642	0.000441137	0.00121445	3.36097	11.2057
ANP32B	5425.8	5394.69	5468.69	5767.09	5110.95	4069.05	5381.68	4357.95	3134.45	4548.54	3616.12	3463.53	4536.02	3783.65	-0.409436	0.000715902	0.00189296	5433.45	4099
ANP32C	1.90068	0.450346	0.549839	3.01942	2.52144	1.19713	14.576	8.86793	4.9694	2.41623	16.9612	3.22389	0	5.01279	1.86273	0.00686802	0.014578	1.68834	6.35829
ANP32E	4734.59	4656.58	4600.5	5072.63	4546.78	3724.27	3627.35	3825.88	3488.52	3770.52	2583.19	2744.6	4847	4035.29	-0.396815	0.00362827	0.0082322	4722.22	3627.4
ANPEP	11581.5	1488.39	6545.28	13230.3	11463.1	10428.2	15493.3	21316	18178.1	14912.9	35632.1	14554.8	8479.63	12695.4	0.974614	0.00018917	0.000558079	8861.71	16854.5
ANTXR1	4.43492	1.35104	0.549839	3.77427	0.63036	8.37992	2.08229	12.6685	6.21175	10.873	5.08835	10.7463	9.53947	1.00256	1.88652	0.0138339	0.0272701	2.14809	7.39912
ANTXR2	5736.25	3420.83	5477.49	6005.63	5857.3	5995.23	5977.21	6930.92	8656.7	5826.73	6870.97	4649.92	5943.09	5008.78	0.20721	0.117569	0.177137	5299.5	6206.62
ANTXRL	5.70204	2.25173	0	12.0777	0.63036	5.98565	37.4812	15.2022	19.8776	3.62434	13.5689	15.0448	1.90789	2.00511	1.66012	0.0561347	0.0938444	4.13236	12.7442
ANTXRLP1	252.157	173.834	210.038	128.325	141.831	20.3512	39.5635	6.33424	2.4847	8.45679	11.8728	109.612	50.5592	89.2276	-2.87466	3.70419e-20	1.21091e-18	181.237	37.6069
ANXA1	25363.3	22144.9	23941.6	38678	26904.4	27893.2	42068.5	44931.3	48564.7	28898.1	49080.6	14935.2	35022.3	35305.1	0.353046	0.0350953	0.0622551	27406.4	36299.9
ANXA10	5.06848	4.05311	7.69774	11.3228	5.04288	11.9713	12.4937	16.469	26.0894	25.3704	11.8728	2.14926	11.4474	74.1892	1.6993	0.00587753	0.0126725	6.63701	21.3392
ANXA11	8612.61	5135.74	5976.74	9086.19	8255.82	15489.7	16220	16727.4	17621.5	12688.8	25105.9	13485.5	9185.56	8724.25	0.975413	1.03219e-14	1.5522e-13	7413.42	15027.6
ANXA2	10415.1	12503	12156.4	16853.6	12055.6	14298.5	10936.2	17027.7	14736.8	14046.7	9097.98	5347.36	19679.9	14966.2	-0.0105987	0.949155	0.963409	12796.7	13348.6
ANXA2P2	9.50339	17.5635	6.04822	18.1165	11.3465	10.7742	14.576	25.3369	4.9694	16.9136	20.3534	6.44778	31.4802	13.0332	0.264371	0.426791	0.520352	12.5156	15.9872
ANXA2R	586.676	571.039	480.559	556.328	466.466	355.548	418.54	496.604	591.359	380.555	200.142	355.702	410.197	639.632	-0.326128	0.094347	0.146747	532.214	427.587
ANXA3	5058.97	779.098	920.43	4436.28	2883.89	7344.4	7908.53	25931.1	26163.9	14220.7	25012.7	8937.7	10531.6	17048.5	2.56513	7.03957e-14	9.33677e-13	2815.74	15899.9
ANXA4	1372.29	1374.91	1350.4	1661.44	1427.13	1194.74	1620.02	2091.56	2084.66	1309.59	1300.92	1124.06	1722.83	1911.88	0.127326	0.372841	0.46552	1437.23	1595.59
ANXA5	7908.72	6538.57	8756.18	9718	7989.81	7163.63	6181.27	13523.6	7670.27	10029.8	6287.51	4278.1	8378.52	9172.4	-0.07666	0.620659	0.698434	8182.26	8076.12
ANXA6	10108.4	11680.6	8753.43	12528.3	10457	6773.37	8570.7	5710.95	6061.43	7043.3	4735.56	4905.69	8674.24	7330.7	-0.70659	1.35455e-08	8.18028e-08	10705.6	6645.1
ANXA7	5303.53	4440.41	5440.1	6373.24	5903.32	4600.57	3945.94	5918.71	4406.62	4314.17	5851.61	4625.21	4476.87	4772.17	-0.212294	0.0329561	0.0588728	5492.12	4767.99
ANXA8	0.63356	0.450346	0	0	0	4.78852	6.24687	0	17.3929	0	1.69612	3.22389	10.4934	0	4.27539	0.000806849	0.00210791	0.216781	4.8713
ANXA8L1	0.63356	2.70208	0	0.754855	1.89108	3.59139	30.1932	2.53369	18.6353	0	6.78447	5.37315	18.125	8.02046	3.12044	0.000152606	0.00046029	1.19631	10.3618
ANXA9	2016.62	796.212	1210.74	1705.97	1592.92	3803.28	2722.59	2654.04	2644.97	1768.68	3970.61	1923.59	2854.21	1395.56	0.853821	0.00036849	0.00102832	1464.49	2637.5
AOAH	11774.1	10927.2	10379.3	13191.8	13558.4	13127.7	7052.71	13201.8	10486.7	13342.4	12793.8	11669.4	11633.4	10177	-0.0652167	0.670965	0.741901	11966.2	11498.3
AOAH-IT1	69.6916	32.8753	41.2379	63.4078	76.2735	235.835	61.4275	140.62	221.138	295.988	267.987	414.807	199.375	176.45	1.97938	1.65552e-08	9.85064e-08	56.6972	223.736
AOC1	1.26712	8.55657	3.29903	7.54855	23.3233	19.1541	2.08229	64.6092	154.052	88.1922	259.506	10.7463	56.2829	1.00256	2.3053	0.00261681	0.00612081	8.79891	72.8475
AOC2	701.351	213.014	416.778	507.263	497.984	1203.12	1024.49	893.127	788.893	845.679	1450.18	877.973	470.296	552.409	0.937165	0.000122648	0.00037602	467.278	900.684
AOC3	459.964	104.931	299.112	306.471	336.612	853.554	884.973	770.243	688.262	613.721	858.236	527.643	326.25	411.048	1.13114	3.87376e-05	0.000130197	301.418	659.326
AOC4P	15.2054	4.95381	9.89709	9.81311	16.3893	76.6164	38.5223	43.0728	27.3317	33.8272	69.5408	32.2389	9.53947	27.069	1.75939	8.9407e-09	5.55743e-08	11.2518	39.751
AOX1	3.1678	4.05311	1.64952	6.79369	3.1518	13.1684	6.24687	8.86793	24.847	4.83245	6.78447	8.59704	2.86184	2.00511	1.16513	0.0606212	0.10012	3.76318	8.69013
AOX2P	0	4.95381	0	0	10.0858	3.59139	0	6.33424	1.24235	7.24868	0	2.14926	0	0	-0.662915	0.599726	0.679954	3.00791	2.2851
AP1AR	732.395	760.634	741.182	718.622	653.052	530.329	443.528	535.876	437.308	457.875	391.803	315.941	750.756	646.649	-0.547947	4.0426e-05	0.000135369	721.177	501.118
AP1B1	1178.42	1605.93	1342.71	1319.49	1340.14	1218.68	1153.59	1781.19	1784.02	1513.77	961.699	1115.47	1762.89	1273.25	0.0142509	0.928214	0.948438	1357.34	1396.06
AP1G1	9306.36	7685.15	8817.76	10355.1	9951.49	10066.7	8838.27	9975.15	10519	10053.9	13972.6	13874.5	8810.65	12199.1	0.233968	0.0169971	0.0327211	9223.17	10923.3
AP1G2	3015.74	3178.54	2832.22	2682.75	3131	3436.96	3617.98	3481.3	3643.82	3663	2656.12	4108.31	3625	3394.66	0.246031	0.0516835	0.0873564	2968.05	3514.13
AP1M1	713.388	643.094	684.549	674.84	826.401	833.203	1010.95	1379.6	1211.29	909.709	1338.24	1068.18	840.427	704.798	0.511703	0.000583969	0.00157235	708.455	1032.93
AP1M2	55.1197	30.1732	59.9324	5.28398	91.4021	141.261	179.077	67.1429	126.72	50.7407	83.1098	63.4032	124.967	51.1304	1.02361	0.028235	0.0512488	48.3823	98.6169
AP1S1	143.184	198.603	181.997	216.643	151.917	203.512	305.055	277.44	245.985	253.704	111.944	99.9406	272.829	223.57	0.259651	0.105928	0.162001	178.469	221.553
AP1S2	7222.58	8246.73	7305.7	8736.69	7309.02	5361.95	3182.78	6811.84	3423.92	4494.18	3848.49	2002.04	7150.79	3704.45	-0.886795	7.00077e-06	2.7158e-05	7764.15	4442.27
AP1S3	287.003	263.903	400.282	224.947	249.622	237.032	138.472	190.027	428.611	228.333	94.9826	554.509	137.368	320.818	-0.150403	0.676736	0.746674	285.151	258.906
AP2A1	738.097	709.295	727.436	679.369	812.533	1161.22	1427.41	1363.13	1369.07	1110.26	1706.29	1389.5	877.631	1045.67	0.771998	5.60304e-06	2.21152e-05	733.346	1272.24
AP2A2	617.721	665.611	769.774	671.821	675.115	685.956	842.286	761.375	787.65	695.873	712.37	715.703	863.322	647.652	0.129931	0.291182	0.380448	680.008	745.799
AP2B1	6759.45	7921.13	7615.26	8021.84	8386.3	5584.62	6829.91	5975.72	5719.78	6462.19	6769.21	6035.12	6171.08	6358.22	-0.317586	1.5556e-06	6.76874e-06	7740.8	6211.76
AP2M1	5500.56	4928.59	4996.93	6045.63	6285.95	6448.94	7050.63	7812.65	6246.54	6173.46	8132.89	5012.07	6016.54	4660.89	0.181047	0.0816426	0.129414	5551.53	6394.96
AP2S1	417.516	472.863	551.488	628.039	661.247	764.967	694.443	997.009	690.747	868.633	708.977	393.315	949.177	683.744	0.415719	0.000795701	0.00208279	546.231	750.112
AP3B1	3279.3	2870.96	3595.39	3805.22	3590.53	3345.98	2485.21	3806.88	4289.84	3945.7	3694.15	3978.28	3828.19	4021.26	0.113453	0.388102	0.481245	3428.28	3710.61
AP3B2	18.3732	4.50346	9.89709	6.79369	1.89108	120.91	12.4937	556.146	124.235	18.1217	1526.51	19.3433	65.8223	124.317	3.96114	9.13887e-06	3.47358e-05	8.29171	285.322
AP3D1	1052.34	959.237	1126.62	1025.09	1134.65	1480.85	1561.72	1828.06	1931.86	1716.73	1629.97	1397.02	1408.03	1548.95	0.590194	9.97955e-11	8.39795e-10	1059.59	1611.46
AP3M1	2526	2582.73	2873.46	2840.52	2955.76	2554.68	1908.42	2033.29	2335.62	2110.57	2184.6	1961.2	2755	1832.67	-0.339016	0.00608326	0.0130701	2755.69	2186.23
AP3M2	1972.9	1593.32	1848.56	1563.3	1573.38	827.217	1222.3	557.413	484.517	593.183	863.324	1057.44	427.368	1728.41	-1.0357	1.0169e-05	3.83442e-05	1710.29	862.352
AP3S1	2130.66	1622.6	1674.26	2216.25	1937.09	3381.89	2992.25	4243.94	3489.76	3318.69	4469.27	2388.9	2196.94	2141.46	0.676426	5.27353e-10	3.95733e-09	1916.17	3180.35
AP3S2	12.6712	9.00692	4.94855	9.05826	5.04288	7.18279	3.12343	5.06739	6.21175	2.41623	6.78447	13.9702	5.72368	10.0256	-0.302265	0.464789	0.557447	8.14556	6.72283
AP4B1	1337.44	1555.95	1570.89	1454.61	1591.66	1422.19	1326.42	1010.94	832.375	974.947	1166.93	1796.78	1345.07	1084.77	-0.311389	0.00537823	0.0117049	1502.11	1217.82
AP4B1-AS1	195.77	241.385	291.414	263.444	327.787	142.459	129.102	100.081	94.4187	141.349	173.004	239.642	191.743	107.274	-0.86437	7.21674e-06	2.79502e-05	263.96	146.564
AP4E1	1313.37	1454.17	1419.13	1330.81	1146.62	1033.12	1201.48	927.332	1483.37	1553.63	902.335	1154.15	1850.66	935.386	-0.127744	0.413621	0.507192	1332.82	1226.83
AP4M1	94.4004	121.143	91.823	82.2792	133.006	81.4049	99.9499	135.553	106.842	91.8166	110.248	125.732	145.954	95.2429	0.070997	0.692215	0.759383	104.53	110.305
AP4S1	694.381	677.771	674.102	538.212	597.581	317.24	272.78	249.569	241.016	286.323	313.782	511.524	459.802	452.153	-0.893628	1.60074e-15	2.69662e-14	636.409	344.91
AP5B1	10275.1	3894.59	7541.04	10712.1	10245.9	17544	13888.9	28250.7	42044.9	27222.4	25775.9	16713.7	19080.8	22908.4	1.46291	1.31855e-14	1.95803e-13	8533.74	23714.4
AP5M1	2062.24	1819.85	2038.25	1979.23	2021.56	1715.49	1488.84	2002.89	1997.7	2125.07	1611.31	1845.14	2696.81	2019.15	-0.0412498	0.71282	0.775895	1984.23	1944.71
AP5S1	88.0648	97.2747	89.6237	85.2986	104.009	63.4479	88.4973	102.615	119.266	123.227	83.1098	73.0748	101.118	135.345	0.0833272	0.660995	0.733364	92.8542	98.8557
AP5Z1	186.9	169.78	209.488	197.772	238.276	432.164	543.477	601.752	559.058	504.991	590.249	398.688	234.671	547.396	1.25859	2.3647e-07	1.16717e-06	200.443	490.272
APAF1	10626.1	4334.58	6419.37	9121.67	7974.05	15034.8	12088.7	12240.3	19085	13956.1	21937.6	11527.6	16864.8	9789.97	0.929039	8.41902e-07	3.80449e-06	7695.14	14725
APBA1	68.4244	121.593	79.1768	44.5364	48.5377	8.37992	11.4526	12.6685	16.1506	3.62434	1.69612	6.44778	7.63158	21.0537	-2.81725	1.64268e-11	1.54223e-10	72.4537	9.90056
APBA2	416.882	493.129	441.52	366.859	422.971	148.444	596.576	54.4744	47.2093	158.263	383.323	581.375	305.263	224.573	-0.76909	0.0759986	0.121676	428.272	277.722
APBA3	40.5478	55.3925	52.2347	40.7622	56.102	44.2938	86.415	141.887	110.569	74.903	57.668	45.1345	26.7105	158.404	0.725466	0.0589982	0.097942	49.0078	82.8872
APBB1	887.617	767.84	785.719	564.631	567.324	264.566	546.601	154.555	146.597	141.349	198.446	529.793	302.401	478.22	-1.32243	1.94371e-06	8.30901e-06	714.626	306.948
APBB1IP	8441.55	4059.87	5214.12	9174.51	7087.13	16249.9	11718.1	26820.4	27293.2	20577.8	25521.5	12158.4	15656.2	11751	1.40279	3.21174e-25	1.95515e-23	6795.43	18638.5
APBB2	139.383	57.6443	37.9389	99.6409	65.5574	287.311	88.4973	390.189	314.315	211.42	617.387	405.135	270.921	138.353	1.89527	3.09227e-06	1.28011e-05	80.0329	302.614
APBB3	1200.6	997.967	1027.1	1184.37	1156.08	2363.14	1931.32	2654.04	2056.09	2280.92	3622.91	1332.54	1160	2240.72	0.897364	4.92964e-11	4.30511e-10	1113.22	2182.41
APC	4517.91	3117.74	3741.1	4492.9	3877.34	4740.64	3802.26	5064.85	6293.75	6347.42	7038.89	5309.75	5837.2	5436.87	0.48449	0.000178	0.0005294	3949.4	5541.29
APC2	14.5719	23.418	17.5948	7.54855	22.6929	26.3369	58.3041	43.0728	77.0258	38.6596	32.2262	23.6419	25.7566	35.0895	1.16621	0.00337147	0.00770198	17.1652	40.0126
APCDD1	16.4726	13.06	7.69774	25.6651	21.4322	14.3656	24.9875	11.4016	27.3317	30.2028	20.3534	5.37315	43.8816	11.0281	0.192013	0.700123	0.765496	16.8655	20.9917
APCDD1L	0	0.900692	0.549839	0	0	5.98565	5.20572	1.26685	7.45411	2.41623	1.69612	2.14926	1.90789	2.00511	3.30247	0.00268994	0.00627332	0.290106	3.34299
APCDD1L-AS1	3.80136	2.25173	0.549839	6.03884	5.67324	8.37992	10.4114	8.86793	2.4847	4.83245	5.08835	6.44778	0.953947	4.01023	0.679302	0.241272	0.325321	3.663	5.71964
APEH	1435.01	1696.9	1424.08	1405.54	1501.52	1313.25	1430.53	1393.53	1387.71	1385.71	1248.34	1301.38	1371.78	1093.79	-0.173044	0.143527	0.21021	1492.61	1325.11
APEX1	2759.79	3240.24	2695.86	2907.7	2462.81	1741.83	1716.85	1505.01	1320.62	1493.23	1109.26	1703.29	2434.47	1446.69	-0.819817	1.32534e-20	4.6529e-19	2813.28	1607.92
APEX2	308.544	375.588	339.8	283.825	397.126	252.595	367.524	283.774	316.799	326.19	228.976	236.419	505.592	226.578	-0.198262	0.182129	0.256731	340.977	304.939
APH1A	3805.79	3674.37	4053.96	4203.79	4345.7	3475.27	4082.33	5602	5255.14	5061.99	4494.71	3941.74	4121.05	4470.4	0.146264	0.0863302	0.135757	4016.72	4500.52
APH1B	1358.99	1217.28	1049.64	1384.4	1225.42	1806.47	1585.66	1807.79	1843.65	1736.06	3210.75	2681.2	3719.44	851.171	0.775422	0.00322606	0.00739518	1247.15	2138.02
API5	3441.5	4206.68	3875.81	3765.97	3661.13	1965.69	2107.28	2147.31	1744.26	2260.38	1265.3	2286.81	3619.27	2138.45	-0.83396	4.24224e-17	9.21887e-16	3790.22	2170.53
APIP	401.677	548.972	569.633	485.372	405.952	547.089	497.667	501.671	454.7	343.104	325.655	289.075	466.48	398.015	-0.190354	0.219118	0.300225	482.321	424.829
APITD1	4.43492	0.900692	6.59806	3.77427	1.89108	3.59139	9.3703	1.26685	2.4847	4.83245	8.48059	10.7463	2.86184	4.01023	0.49923	0.401901	0.495734	3.51981	5.29385
APLF	127.345	129.249	127.563	144.177	114.095	155.627	121.814	76.0108	168.96	122.019	81.4137	78.448	138.322	117.299	-0.128733	0.53945	0.626233	128.486	117.768
APLN	2.53424	1.80138	2.74919	1.50971	4.41252	0	0	0	6.21175	3.62434	3.39224	0	0.953947	1.00256	-1.1346	0.15565	0.225324	2.60141	1.6872
APLP1	9.50339	9.90761	11.5466	0.754855	6.3036	17.957	12.4937	11.4016	31.0588	7.24868	6.78447	11.8209	7.63158	18.046	0.84282	0.0594849	0.0985689	7.60321	13.827
APLP2	21283.2	18368.7	23574.9	28646	26057.8	33878.8	25451.8	40525.2	38695.5	32860.7	35398	20658.7	36305.3	26066.5	0.413323	0.00023744	0.000685989	23586.1	32204.5
APMAP	8722.85	4397.18	6177.44	8850.67	9346.97	9629.72	10957	10395.7	11032.1	10198.9	27763.8	12590.4	12040.7	4706	0.672017	0.00889383	0.018341	7499.02	12146
APOA1-AS	21.541	19.3649	22.5434	23.4005	21.4322	23.9426	16.6583	34.2049	33.5435	25.3704	16.9612	30.0896	18.125	42.1074	0.316967	0.195453	0.272438	21.6564	26.7781
APOA1BP	333.886	408.914	346.398	401.583	344.176	275.34	327.96	249.569	196.291	297.196	181.485	245.016	274.737	271.693	-0.507911	4.24905e-05	0.000141682	366.991	257.699
APOA2	159.023	176.536	269.971	324.588	249.622	386.673	84.3327	523.208	324.254	381.764	413.853	371.822	136.414	1411.6	0.890703	0.0618097	0.101808	235.948	448.213
APOBEC2	113.407	107.633	138.009	103.415	95.8146	69.4336	86.415	82.3451	69.5717	49.5326	44.0991	85.9704	79.1776	72.1841	-0.635814	0.000488444	0.0013331	111.656	70.9699
APOBEC3A	970.613	312.09	859.947	1013.02	859.81	1953.72	3099.49	7968.47	6522.34	5350.73	5519.17	2507.11	883.355	4179.66	2.29066	3.96556e-16	7.4646e-15	803.095	4220.45
APOBEC3B	12.6712	30.1732	22.5434	106.435	18.2804	65.8422	211.352	96.2804	325.496	526.737	42.403	25.7911	69.6381	287.734	2.26395	0.00172721	0.00420413	38.0205	183.475
APOBEC3B-AS1	0.63356	0	0.549839	0	0	15.5627	5.20572	6.33424	6.21175	8.45679	13.5689	2.14926	12.4013	6.01534	5.08111	7.78058e-07	3.53363e-06	0.23668	8.43401
APOBEC3C	982.651	1544.24	1412.54	1364.78	1416.42	744.615	954.729	1007.14	1033.64	1308.39	373.146	654.45	1457.63	1194.05	-0.522731	0.00589374	0.0127002	1344.12	969.754
APOBEC3D	599.347	767.389	519.048	483.862	574.258	436.953	492.461	354.717	608.752	480.829	239.153	551.285	483.651	625.596	-0.292969	0.11557	0.174569	588.781	474.822
APOBEC3F	590.478	783.602	698.295	407.622	662.508	617.72	691.32	775.31	1012.52	791.314	281.556	400.837	896.71	1164.97	0.210308	0.359599	0.452014	628.501	736.917
APOBEC3G	1464.16	2146.35	1710.55	1742.21	1979.33	1327.62	1921.95	2096.63	1995.22	2120.24	1287.35	1443.23	2250.36	2176.55	0.0208969	0.877266	0.909195	1808.52	1846.57
APOBEC3H	174.862	213.464	199.591	163.049	260.969	219.075	352.948	92.4798	124.235	102.69	189.965	258.986	148.816	144.368	-0.189969	0.427129	0.520697	202.387	181.507
APOBEC4	0	1.35104	1.09968	1.50971	0	1.19713	3.12343	2.53369	3.72705	2.41623	3.39224	2.14926	0.953947	6.01534	1.79851	0.0205427	0.0387071	0.792085	2.83426
APOBR	11212.1	5717.14	7964.41	9550.42	11007.3	28910.7	23367.4	49042.2	53811.2	34352.7	54937.3	16273.1	16013.9	28250.1	1.76844	2.60563e-31	3.63888e-29	9090.28	33884.3
APOC1	0	0	0	0	1.89108	1.19713	0	0	36.0282	0	0	1.07463	0	2.00511	2.94	0.174975	0.248471	0.378216	4.47834
APOD	1.90068	7.20553	2.19935	0	0	1.19713	0	0	2.4847	0	1.69612	6.44778	0	2.00511	-1.10017	0.372644	0.465358	2.26111	1.53676
APOE	14.5719	18.9145	12.6463	18.1165	6.93395	14.3656	10.4114	10.1348	77.0258	4.83245	10.1767	25.7911	0.953947	20.0511	0.223867	0.690757	0.758049	14.2366	19.3048
APOF	1.90068	2.70208	3.84887	0	5.04288	4.78852	3.12343	11.4016	7.45411	4.83245	6.78447	2.14926	2.86184	17.0435	1.28161	0.0367577	0.064919	2.6989	6.71546
APOL1	2296.65	1586.12	2723.35	2545.37	3568.47	2008.79	3949.06	10356.5	16640	5830.35	2857.96	2026.75	4532.2	10811.6	1.2666	0.000986809	0.00252462	2543.99	6557.02
APOL2	5324.44	2977.24	4259.6	4913.35	5851	5901.86	9095.44	21679.6	20401.9	13132.2	7649.49	4744.49	7774.67	14462.9	1.2313	1.20737e-06	5.33539e-06	4665.12	11649.2
APOL3	3463.67	4314.76	4106.19	3633.87	4636.92	1405.43	1890.72	4134.99	2170.39	1958.35	581.769	1399.17	3820.56	3274.35	-0.924245	0.000165933	0.000496622	4031.09	2292.86
APOL4	10.137	14.8614	31.8906	21.1359	37.8216	44.2938	64.551	238.167	96.9034	15.7055	30.5301	19.3433	110.658	96.2455	1.56341	0.00118507	0.00298871	23.1693	79.5997
APOL5	0	0	0.549839	0	0	0	0	1.26685	9.93881	8.45679	0	1.07463	0.953947	3.00767	4.0347	0.0111754	0.0225121	0.109968	2.7443
APOL6	16522	22123.7	29216.2	22957.4	29865.2	9951.75	16667.7	62796.3	88111.3	49593	11364	16430	33660	79406.5	0.70321	0.111847	0.169796	24136.9	40886.7
APOLD1	103.27	154.018	57.733	106.435	57.9931	193.935	142.637	76.0108	62.1175	164.303	96.6787	156.896	91.5789	96.2455	0.33144	0.199722	0.277635	95.8898	120.045
APOM	134.315	107.182	111.067	154.745	150.026	257.383	246.751	339.515	309.345	271.825	415.549	305.195	120.197	346.885	1.08988	1.21508e-16	2.47353e-15	131.467	290.294
APOO	79.8285	89.6188	85.225	87.5632	60.5145	117.319	117.649	146.954	130.447	129.268	113.64	75.2241	100.164	113.289	0.504118	0.00602201	0.0129546	80.55	115.995
APOOL	650.032	899.791	796.716	730.7	688.983	464.487	320.672	372.453	318.042	403.51	293.428	466.389	730.723	518.322	-0.814949	5.72251e-10	4.26728e-09	753.244	432.003
APOPT1	221.112	236.432	213.887	214.379	199.194	177.175	237.381	302.776	196.291	205.379	208.623	189.135	216.546	177.453	-0.0491574	0.646353	0.720433	217.001	212.307
APP	5639.95	5113.68	5693.58	6944.67	6320.61	4482.06	5958.47	6681.35	5770.72	4954.47	4638.88	3718.22	7150.79	4662.89	-0.18409	0.115154	0.174051	5942.5	5335.32
APPBP2	2736.34	2571.02	2562.25	2343.07	2293.88	3136.48	2862.11	3053.1	3213.96	3143.51	2571.32	2402.87	3265.36	2746	0.22621	0.012416	0.0247498	2501.31	2932.75
APPL1	2403.73	3136.21	2942.19	2824.67	2442.01	1868.72	1424.29	1408.73	1989	1477.52	1043.11	2281.44	2727.33	1788.56	-0.637233	4.30919e-05	0.000143486	2749.76	1778.75
APPL2	3497.88	2130.14	2658.47	2710.68	2738.28	5924.6	4404.04	4642.99	4907.29	4814.33	7895.43	5337.69	3652.66	3416.72	0.837732	2.52916e-14	3.55825e-13	2747.09	4999.53
APRT	230.616	303.983	261.723	252.876	240.797	166.401	321.714	267.305	213.684	215.044	173.004	151.523	193.651	305.78	-0.207464	0.432733	0.526279	257.999	223.123
APTR	143.818	90.9699	92.9227	110.964	98.3361	568.637	378.977	357.251	448.489	337.063	619.083	416.956	320.526	191.488	1.88426	8.01204e-18	1.89034e-16	107.402	404.275
APTX	714.655	692.182	711.491	753.345	770.299	588.988	608.028	699.3	501.91	645.132	520.708	635.106	642.96	631.611	-0.258061	0.00356859	0.00810587	728.395	608.194
AQP1	31.0444	18.9145	15.3955	50.5753	25.8447	73.025	21.864	12.6685	14.9082	35.0353	40.7068	18.2687	7.63158	24.0614	-0.0818639	0.838018	0.878975	28.3549	27.5744
AQP10	280.667	136.455	32.9903	260.425	245.84	403.433	386.265	491.537	154.052	492.91	410.461	40.8359	82.9934	225.575	0.614938	0.28003	0.368453	191.275	298.673
AQP11	179.297	179.688	131.961	123.041	107.791	116.122	63.5098	51.9407	68.3293	64.03	37.3146	85.9704	75.3618	92.2353	-0.98435	2.02168e-07	1.00835e-06	144.356	72.7571
AQP3	770.409	700.738	887.439	432.532	410.994	664.408	461.227	241.968	176.414	1611.62	101.767	195.583	598.125	867.212	-0.274972	0.52731	0.615185	640.422	546.481
AQP7	20.2739	3.15242	3.29903	9.81311	1.89108	3.59139	2.08229	2.53369	0	1.20811	1.69612	5.37315	1.90789	6.01534	-1.56279	0.0240333	0.044455	7.68591	2.712
AQP7P1	0.63356	1.35104	7.69774	0.754855	3.1518	43.0967	7.28801	3.80054	3.72705	8.45679	118.728	8.59704	48.6513	6.01534	3.18684	0.000135772	0.000413389	2.7178	27.5957
AQP7P3	0	0	1.09968	0	0.63036	5.98565	5.20572	0	2.4847	0	16.9612	0	3.81579	0	3.16792	0.0233965	0.0434293	0.346007	3.82812
AQP8	0	2.70208	2.19935	0.754855	8.19467	1.19713	4.16458	10.1348	2.4847	1.20811	5.08835	2.14926	2.86184	15.0384	0.828429	0.272824	0.360729	2.77019	4.92523
AQP9	63968.6	13069.5	31627.8	59717.3	54192	101161	66007.5	117072	159795	132245	196209	101418	93472.5	75471.5	1.41387	8.45252e-11	7.17973e-10	44515.1	115872
AQR	3337.59	3314.55	3498.07	3360.61	3477.69	2005.19	1816.8	2339.87	2075.97	2158.9	1706.29	2546.87	2598.55	2761.04	-0.612002	1.57317e-09	1.09488e-08	3397.7	2223.28
AR	27.2431	21.1663	25.2926	9.81311	25.8447	4.78852	3.12343	35.4717	9.93881	1.20811	8.48059	1.07463	20.0329	7.0179	-1.61627	0.00162445	0.00397439	21.8719	10.1263
ARAF	2450.61	2266.14	2773.94	2316.65	2998.62	2444.54	3160.91	3798.01	3138.18	2973.17	5056.13	3915.95	2019.51	3695.43	0.346601	0.0126635	0.0252088	2561.19	3355.76
ARAP1	6668.85	3976.55	5077.21	6861.63	6993.21	10694	12230.3	16742.7	17935.8	12523.3	19390	9803.85	7059.21	9758.89	1.0649	1.44511e-11	1.36893e-10	5915.49	12904.2
ARAP2	7085.1	7678.85	8268.47	7875.4	9325.54	5655.25	4666.41	6520.46	8802.06	6260.44	4794.93	6849.69	8316.51	8271.1	-0.270468	0.0831585	0.131506	8046.67	6681.87
ARAP3	3416.15	1184.86	1705.6	3069.24	2745.85	9398.67	4980.83	7229.9	9959.93	6386.08	11915.2	5469.87	3182.37	3655.32	1.45899	1.95179e-14	2.78934e-13	2424.34	6908.69
ARCN1	3366.1	2972.28	3148.93	3183.22	3166.3	3996.02	3309.8	4606.26	4817.84	4463.98	3285.38	3301.26	6736.77	3394.66	0.371936	0.01678	0.032349	3167.37	4212.44
AREG	46.2499	34.6766	163.852	67.9369	88.2503	47.8852	32.2755	57.0081	96.9034	146.182	208.623	625.435	28.6184	35.0895	0.396618	0.428141	0.521797	80.1931	142.002
AREL1	4637.02	3031.28	3914.3	5083.95	4935.72	5196.75	3628.39	4755.74	6198.09	4619.82	8312.68	5460.19	6029.9	3852.83	0.29884	0.0607	0.100233	4320.45	5339.38
ARF1	8222.97	5913.94	7541.04	9410.78	8826.92	11464.9	12000.2	14695.4	13539.1	12000.2	18489.4	10228.3	8980.46	10782.5	0.611714	2.73997e-11	2.49594e-10	7983.13	12464.5
ARF3	10826.3	8552.07	10268.2	13739.1	12050	11643.3	9692.01	12664.7	11681.8	11083.2	14026.9	7869.51	11620	8613.97	-0.0336691	0.774101	0.826866	11087.1	10988.4
ARF4	4181.49	2834.03	4803.39	6056.2	5052.33	8190.77	5799.17	7247.63	5853.96	6707.44	9932.47	7173.15	6192.07	6408.35	0.620596	3.05148e-06	1.2646e-05	4585.49	7056.11
ARF5	1170.82	910.599	1027.1	1176.82	1270.17	2328.42	2326.96	2702.18	2206.42	1873.78	2735.84	1562.51	1412.8	1574.01	0.868559	1.15091e-09	8.16556e-09	1111.1	2080.32
ARF6	8030.37	8843.44	9630.97	10080.3	8754.43	6510	6956.93	7499.73	6172	5493.29	6835.36	5437.63	6886.54	5634.37	-0.516449	5.00617e-07	2.33905e-06	9067.91	6380.65
ARFGAP1	620.888	711.096	635.613	594.071	634.772	770.952	822.504	965.337	915.613	855.344	1187.28	701.733	644.868	862.199	0.393054	0.0223837	0.041778	639.288	858.426
ARFGAP2	3645.5	3614.93	3785.64	3842.21	3997.11	2719.88	3584.66	3476.23	3074.82	3220.83	3163.26	3384.01	3115.59	3614.22	-0.211583	0.104544	0.160155	3777.08	3261.5
ARFGAP3	3231.79	2331.44	2539.7	3672.37	2951.97	4404.24	2950.6	4627.79	3437.59	4119.66	6855.71	3900.91	2744.51	3336.51	0.412238	0.000524034	0.00142043	2945.46	4041.95
ARFGEF1	5392.23	4048.16	4449.84	5342.11	4991.82	5299.7	4590.41	5210.54	6123.55	4946.01	6089.06	5606.34	7332.99	3998.2	0.16927	0.264686	0.351773	4844.83	5466.31
ARFGEF2	3846.34	4350.34	4128.74	3921.47	3694.54	2203.92	2142.68	2108.03	1977.82	2401.73	1304.31	3195.95	3100.33	3159.06	-0.74879	5.99986e-11	5.18789e-10	3988.29	2399.31
ARFGEF3	3.80136	4.05311	7.1479	19.6262	7.56431	11.9713	15.6172	12.6685	14.9082	10.873	10.1767	4.29852	6.67763	28.0716	0.663165	0.282515	0.371131	8.43858	12.807
ARFIP1	2723.67	1133.07	1310.27	2152.85	1910.62	5534.34	2882.93	4670.87	4816.59	6287.02	4355.63	1711.89	2398.22	3252.3	1.0699	1.62103e-05	5.85551e-05	1846.09	3989.98
ARFIP2	961.744	984.456	975.414	1020.56	1047.66	982.845	895.384	844.987	827.406	879.506	759.861	994.033	1026.45	997.544	-0.12806	0.0978465	0.151335	997.967	912.001
ARFRP1	209.075	211.663	214.437	151.726	212.431	232.243	270.698	316.712	250.955	254.912	267.987	191.284	297.631	207.529	0.320529	0.0116869	0.0234367	199.866	254.439
ARG1	1792.97	330.554	658.157	1712.77	1718.36	10898.7	9842.98	6490.06	17349.4	6012.78	44224.6	19831.2	10454.3	1710.36	3.47614	1.20426e-13	1.55173e-12	1242.56	14090.5
ARG2	572.104	529.607	594.925	605.394	681.419	392.659	400.841	433.262	300.649	455.458	401.98	312.717	537.072	410.046	-0.568392	1.52931e-05	5.55272e-05	596.69	404.965
ARGFX	0.63356	0	2.74919	0	0.63036	2.39426	1.04114	2.53369	2.4847	1.20811	5.08835	2.14926	0	0	0.911733	0.401816	0.495661	0.802622	1.87773
ARGFXP2	262.294	190.046	192.993	264.954	230.081	341.182	170.748	391.456	344.131	438.545	330.743	284.777	293.816	373.954	0.53724	0.00846402	0.0175365	228.074	329.928
ARGLU1	12929.1	11701.8	11814.9	11882.9	11317.5	12171.2	10690.5	11273.7	11996.1	10604.8	13277.2	13737	10352.2	11357	-0.0298066	0.635469	0.711098	11929.2	11717.7
ARHGAP1	3246.99	2737.65	2970.78	2978.66	3346.58	3130.5	3644.01	4240.14	3761.84	3605.01	4672.81	2796.19	3016.38	2755.03	0.16948	0.168235	0.240628	3056.13	3513.54
ARHGAP10	247.722	285.519	259.524	280.051	457.011	203.512	195.735	133.019	111.812	157.055	120.424	202.03	153.585	172.44	-0.932719	8.50742e-07	3.84169e-06	305.965	161.068
ARHGAP11A	420.05	458.002	389.286	378.937	457.641	363.928	421.663	349.65	460.912	816.684	193.357	347.105	598.125	461.176	0.0486757	0.848069	0.88653	420.783	445.845
ARHGAP11B	48.7841	65.7505	81.9259	99.6409	63.036	45.491	49.9749	69.6766	69.5717	76.1111	35.6185	68.7763	106.842	66.1688	-0.152203	0.432513	0.526103	71.8275	65.359
ARHGAP12	2484.19	2262.09	2400.6	2210.22	2583.21	1954.91	1558.59	1102.16	1311.92	1334.96	1602.83	2700.54	1715.2	1403.58	-0.567244	2.9195e-07	1.41418e-06	2388.06	1631.63
ARHGAP15	6303.92	3236.64	4201.32	4582.72	4718.24	5741.44	4336.37	5524.72	5212.9	4807.08	11978	5434.4	4254.6	6060.46	0.326504	0.0896094	0.140268	4608.57	5927.77
ARHGAP17	1555.39	1739.24	1678.66	1575.38	1638.93	1276.14	1451.36	2115.63	2195.23	1379.66	1188.98	1932.18	1826.81	1986.07	0.0596064	0.688659	0.756402	1637.52	1705.79
ARHGAP18	1186.66	953.833	1284.97	1376.1	1633.89	1409.02	1169.21	1150.3	954.126	1566.92	1458.66	750.092	2050.99	1046.67	-0.0248907	0.90716	0.932191	1287.09	1284
ARHGAP19	3354.06	1730.68	2147.12	3034.52	2609.69	5144.07	4196.85	2585.63	4599.18	3984.36	5783.76	3779.47	3396.05	1702.34	0.59545	0.00391022	0.00879939	2575.21	3907.97
ARHGAP20	11.4041	31.5242	25.8424	28.6845	12.6072	16.7598	9.3703	13.9353	4.9694	4.83245	5.08835	55.8808	7.63158	1.00256	-0.967835	0.0813815	0.129076	22.0125	13.2745
ARHGAP21	2615.33	3052.44	3206.66	3445.91	3393.86	1878.3	2855.86	1934.48	1033.64	2103.32	2062.48	1635.59	2986.81	2030.18	-0.618927	0.000584315	0.00157305	3142.84	2057.85
ARHGAP22	19.6403	15.3118	19.7942	12.0777	20.8019	27.534	9.3703	17.7359	11.1812	6.04056	10.1767	2.14926	9.53947	30.0767	-0.361669	0.453292	0.545968	17.5252	13.756
ARHGAP23	9.50339	8.10623	5.49839	8.3034	4.41252	10.7742	5.20572	26.6038	63.3599	28.9947	8.48059	7.52241	37.2039	34.0869	1.60319	0.00043908	0.00120897	7.16479	24.6925
ARHGAP24	815.391	946.627	726.337	955.646	673.224	1728.66	932.865	1333.99	2412.65	1626.12	1416.26	4542.46	1793.42	1048.67	1.1572	0.00189517	0.00456615	823.445	1870.57
ARHGAP25	14946.9	7374.86	9685.41	9991.26	12686.6	23277	20885.4	23379.7	24191.1	20914.8	26430.6	16210.8	14771.9	14650.4	0.889312	1.98141e-12	2.1346e-11	10937	20523.5
ARHGAP26	15785.8	7514.47	10444.2	14857.8	13777.1	24846.5	23673.5	28473.7	34219.3	28029.4	46746.7	23623.6	18866.2	23208.2	1.13838	1.09525e-31	1.65095e-29	12475.9	27965.2
ARHGAP26-AS1	8.23628	1.35104	8.24758	5.28398	18.9108	9.57705	18.7406	13.9353	27.3317	12.0811	23.7457	9.67167	1.90789	19.0486	0.83159	0.0461778	0.0792639	8.40593	15.1155
ARHGAP26-IT1	48.1505	13.06	36.8392	60.3884	46.0162	99.3619	55.1807	46.8733	85.7222	103.898	174.7	124.657	53.421	98.2506	1.18044	9.91879e-07	4.43787e-06	40.8909	93.5627
ARHGAP27	4870.17	3493.33	3665.22	4746.53	4275.1	10638.9	9292.21	14706.8	15379.1	11380.4	14449.2	7225.81	8139.08	8682.15	1.33394	1.57342e-24	8.86764e-23	4210.07	11099.3
ARHGAP29	70.3251	92.7713	58.8327	57.369	66.8181	481.247	178.036	169.758	222.381	450.626	237.457	306.27	523.717	58.1483	2.07009	6.77309e-08	3.65044e-07	69.2232	291.96
ARHGAP30	32390.1	20027.3	24352.9	31157.4	30705.4	40374.4	39253.2	49326	55479.7	39151.3	63867.3	34201.2	35960	33114.5	0.614381	4.48517e-14	6.08912e-13	27726.6	43414.2
ARHGAP31	923.096	1077.23	1179.4	1324.02	1048.92	758.981	505.996	1777.39	1316.89	814.268	422.333	478.21	1550.16	963.458	-0.348276	0.0618455	0.101858	1110.53	954.188
ARHGAP31-AS1	34.2122	31.0739	36.8392	39.2525	41.6037	21.5484	16.6583	31.6712	33.5435	12.0811	6.78447	23.6419	39.1118	29.0742	-0.637997	0.0084323	0.0174803	36.5963	23.7905
ARHGAP32	478.971	631.385	466.263	495.185	478.443	223.863	230.093	191.294	118.023	178.801	142.474	111.762	372.039	329.841	-1.31642	2.23347e-08	1.30284e-07	510.049	210.91
ARHGAP33	92.4997	56.2932	73.1285	68.6918	97.7057	101.756	181.159	125.418	156.536	88.1922	189.965	74.1495	48.6513	128.327	0.604713	0.0330106	0.0589467	77.6638	121.573
ARHGAP35	2197.18	2436.37	2764.59	2715.97	3070.48	1142.06	1091.12	1016.01	1074.63	1048.64	993.925	1567.88	1428.06	1069.73	-1.18931	2.06382e-22	9.15845e-21	2636.92	1159.12
ARHGAP39	1.90068	5.8545	0.549839	8.3034	1.26072	2.39426	3.12343	0	0	1.20811	1.69612	0	0.953947	2.00511	-1.56485	0.109059	0.166121	3.57383	1.26455
ARHGAP4	2098.35	2047.27	1823.26	1937.71	2068.21	2874.31	3067.21	3567.44	3399.07	2605.9	5398.74	2653.26	1805.82	2796.13	0.582425	0.000791261	0.00207231	1994.96	3129.77
ARHGAP42	89.3319	111.235	120.415	55.1044	48.5377	70.6307	26.0286	13.9353	37.2705	201.755	15.2651	141.851	62.9605	108.276	-0.126667	0.82265	0.866492	84.9248	75.3303
ARHGAP44	3.1678	9.00692	13.746	6.79369	5.67324	16.7598	3.12343	11.4016	8.69646	9.6649	3.39224	4.29852	6.67763	18.046	0.263997	0.587217	0.669449	7.67752	9.11785
ARHGAP5	2959.36	2904.28	2927.34	2662.37	2189.24	1338.39	991.169	903.262	1104.45	1058.31	831.098	1657.08	1458.58	1525.89	-1.17636	8.1089e-21	2.93357e-19	2728.52	1207.58
ARHGAP5-AS1	10.137	18.4642	13.746	12.0777	11.3465	14.3656	6.24687	11.4016	12.4235	9.6649	3.39224	15.0448	9.53947	12.0307	-0.316421	0.31792	0.409179	13.1543	10.4566
ARHGAP6	157.756	158.522	155.604	177.391	284.923	247.806	325.878	230.566	64.6022	306.861	259.506	235.344	247.072	211.54	0.354752	0.299858	0.389715	186.839	236.575
ARHGAP9	13278.1	5845.04	9243.89	10956	11374.8	26467.4	25344.6	28915.8	27070.8	23297.2	34709.4	15937.8	14545.8	14583.2	1.16935	8.194e-17	1.70645e-15	10139.6	23430.2
ARHGDIA	686.145	803.867	901.735	872.612	961.929	1176.78	1681.45	2457.68	2282.2	1852.04	3298.95	1494.81	907.204	1943.96	1.069	7.06148e-07	3.23178e-06	845.258	1899.45
ARHGDIB	56090.3	35852.9	45578.9	58781.3	56959.3	78595.2	90632.7	76532.8	66468.3	58456.9	122677	60671.5	57996.2	42026.2	0.4974	0.00176294	0.00428014	50652.5	72672.9
ARHGEF1	3113.95	3116.39	2958.13	2316.65	2994.21	6041.92	7185.98	8755.18	8251.69	5568.19	10938.3	6850.77	3303.52	5302.53	1.17137	8.5784e-07	3.87098e-06	2899.87	6910.89
ARHGEF10	51.3183	124.746	57.733	76.9952	35.3001	63.4479	93.703	43.0728	49.694	15.7055	47.4913	66.6271	106.842	136.348	0.00431349	0.989159	0.992608	69.2185	69.2146
ARHGEF10L	148.253	211.663	140.759	152.481	153.177	161.613	156.172	323.046	81.9952	148.598	83.1098	58.03	224.178	162.414	-0.161354	0.544978	0.631722	161.266	155.462
ARHGEF11	3518.79	2021.15	2552.9	3204.36	3204.75	6161.63	5251.53	8833.72	10030.7	7995.29	9243.84	6077.03	6352.33	6245.93	1.31359	2.70027e-20	9.0134e-19	2900.39	7354.67
ARHGEF12	2728.74	3200.61	2673.32	3356.09	3316.95	1927.38	2671.58	1515.15	2643.72	2393.27	1904.74	1710.81	3526.74	1633.17	-0.472079	0.0462922	0.0794105	3055.14	2214.06
ARHGEF17	19.0068	12.6097	15.3955	29.4393	19.5411	143.656	81.2093	105.148	186.353	35.0353	140.778	73.0748	41.0197	31.0793	2.17345	9.52029e-08	4.995e-07	19.1985	93.0392
ARHGEF18	2090.75	1672.58	1767.18	1613.88	1662.26	1507.19	1667.91	1581.03	1832.47	1518.6	1519.72	2622.1	1192.43	1483.78	-0.0944532	0.549377	0.635883	1761.33	1658.36
ARHGEF19	137.482	134.203	127.563	102.66	123.55	254.989	152.007	74.744	114.296	224.709	237.457	861.853	170.757	147.376	0.767905	0.0168348	0.0324316	125.092	248.687
ARHGEF2	3940.74	2918.24	3114.29	4427.22	3541.99	8446.96	6634.17	7949.47	8562.28	6293.06	8249.92	4522.04	5651.18	5213.3	0.898715	4.37261e-16	8.16608e-15	3588.5	6835.82
ARHGEF25	30.4109	49.5381	34.6398	19.6262	52.9502	10.7742	22.9052	7.60108	4.9694	8.45679	3.39224	18.2687	45.7895	9.02302	-1.61147	2.84915e-06	1.18723e-05	37.433	14.5756
ARHGEF26	18.3732	19.8152	11.5466	20.3811	35.3001	19.1541	19.7817	19.0027	37.2705	26.5785	10.1767	40.8359	41.9737	17.0435	0.255605	0.516257	0.605198	21.0833	25.7575
ARHGEF26-AS1	1.26712	0.450346	1.09968	3.01942	0.63036	4.78852	0	0	1.24235	0	6.78447	0	0	0	-0.459715	0.720225	0.782252	1.29338	1.42393
ARHGEF28	19.6403	58.545	29.1414	42.2719	63.6663	5.98565	28.1109	1.26685	4.9694	8.45679	13.5689	81.6719	19.0789	10.0256	-1.59204	0.000598783	0.0016079	42.653	19.2372
ARHGEF3	5306.7	5752.72	5066.21	3889.77	5150.67	3004.8	3715.84	3137.98	3282.29	2772.62	2717.18	3879.41	4142.99	4781.2	-0.524537	6.28283e-06	2.45838e-05	5033.21	3492.7
ARHGEF33	5.70204	13.9607	8.24758	3.77427	10.0858	7.18279	2.08229	3.80054	6.21175	8.45679	3.39224	5.37315	11.4474	20.0511	-0.152494	0.731577	0.791803	8.35407	7.55534
ARHGEF34P	131.147	103.129	70.9292	73.2209	59.8842	44.2938	37.4812	12.6685	45.967	22.9541	45.7952	47.2837	61.0526	48.1227	-1.11087	0.000762781	0.00200547	87.6621	40.6243
ARHGEF35	48.7841	56.7436	63.2314	65.6724	49.7984	38.3082	46.8515	17.7359	52.1787	39.8677	15.2651	23.6419	20.9868	31.0793	-0.827436	0.00560204	0.0121419	56.846	31.7683
ARHGEF37	1.26712	4.95381	4.39871	6.79369	3.78216	33.5197	6.24687	17.7359	48.4517	30.2028	22.0495	0	19.0789	11.0281	2.03305	0.00019655	0.000577964	4.2391	20.9237
ARHGEF39	114.041	58.9953	88.524	83.7889	93.9236	95.7705	89.5384	43.0728	86.9646	73.6949	66.1486	128.956	102.072	42.1074	-0.127915	0.563704	0.649066	87.8545	80.925
ARHGEF4	13.3048	23.8683	10.9968	21.1359	15.1286	20.3512	23.9463	29.1375	18.6353	12.0811	25.4418	16.1194	9.53947	8.02046	0.0359713	0.930954	0.950675	16.8869	18.1414
ARHGEF40	3230.52	1537.03	1762.23	3227.76	3339.01	12395.1	12197	9269.52	8000.74	9204.61	25292.5	7754.53	4088.62	5734.63	1.90823	6.16721e-15	9.54636e-14	2619.31	10437.5
ARHGEF5	122.277	85.5657	110.518	92.8472	68.7092	107.742	109.32	49.407	150.324	68.8624	96.6787	76.2987	103.98	81.2071	-0.0247893	0.931064	0.950737	95.9833	93.7579
ARHGEF6	12628.7	11654.5	11802.3	11662.5	13071.1	9368.75	8692.51	9582.43	8830.63	8106.44	10509.1	8489.58	10390.4	7143.22	-0.439884	5.01976e-05	0.000165091	12163.8	9012.57
ARHGEF7	2152.84	2681.36	2378.05	2625.39	2364.48	1960.9	2058.34	2130.84	1878.43	2117.82	2425.45	2398.57	1835.39	2298.86	-0.205778	0.00733369	0.0154559	2440.42	2122.74
ARHGEF9	1094.16	1431.65	1025.45	1036.42	1059	508.781	596.576	197.628	285.741	334.647	495.267	735.047	538.026	534.363	-1.30024	2.49203e-17	5.58149e-16	1129.34	469.564
ARHGEF9-IT1	3.80136	3.15242	3.84887	3.01942	3.78216	2.39426	5.20572	1.26685	0	4.83245	5.08835	11.8209	2.86184	6.01534	0.133812	0.80574	0.852849	3.52085	4.38731
ARID1A	7717.39	6095.88	6675.59	7409.66	7931.81	9791.33	9234.95	9725.58	12962.7	9767.59	13214.5	10131.6	9060.59	9323.78	0.51876	7.47304e-11	6.39061e-10	7166.07	10357
ARID1B	2847.85	3074.06	3275.39	2591.42	3194.03	2713.9	2994.33	3051.83	3145.63	2482.67	2340.64	3864.37	2441.15	3039.75	-0.0452235	0.692247	0.759383	2996.55	2897.14
ARID2	3334.42	3480.72	3516.22	3556.12	3475.17	2393.06	2383.18	2118.17	2433.77	1896.74	2783.33	3709.62	2424.93	2818.19	-0.453227	7.31625e-07	3.33631e-06	3472.53	2551.22
ARID3A	466.3	266.154	333.202	495.185	447.555	715.884	568.465	877.925	1124.33	717.619	1423.04	624.36	1163.82	466.189	1.05044	5.8557e-08	3.18218e-07	401.679	853.514
ARID3B	1709.98	1094.34	1359.2	1576.14	1581.57	2688.76	2212.43	2627.44	2720.75	2804.03	3721.28	2726.34	1569.24	2696.88	0.826646	1.06061e-27	9.03322e-26	1464.25	2640.79
ARID3C	0	0.900692	3.29903	0.754855	0	4.78852	0	0	4.9694	3.62434	0	0	0	1.00256	0.506447	0.713759	0.77665	0.990916	1.59831
ARID4A	7477.27	4804.29	6098.81	6996	6824.27	7956.13	6138.59	6825.77	9234.39	8255.03	11263.9	8433.7	7007.69	8563.84	0.340131	0.00258542	0.00605561	6440.13	8186.56
ARID4B	9742.25	6184.6	8847.45	9642.52	9150.93	10483.3	9182.89	13191.7	17240.1	12240.6	15806.1	12380.8	10243.5	15578.7	0.564884	2.27229e-05	7.98179e-05	8713.55	12927.5
ARID5A	597.447	485.923	703.243	696.731	779.755	946.931	1093.2	2263.86	2764.23	1159.79	3061.49	1888.12	598.125	1811.62	1.27181	7.45791e-08	3.99121e-07	652.62	1731.93
ARID5B	2996.74	3148.82	4335.48	3578.01	3813.04	2803.68	2531.02	3135.45	5271.29	4668.15	1913.22	4477.98	1336.48	4641.84	-0.0644849	0.821798	0.865883	3574.42	3419.9
ARIH1	6028.95	5124.04	5854.68	6295.49	6786.45	5752.21	5100.57	5666.61	5412.92	5110.32	6988.01	7219.36	3954.11	6079.51	-0.0943686	0.171131	0.244126	6017.92	5698.18
ARIH2	4784.01	4794.83	4692.87	4944.3	5010.73	3513.58	4097.94	3396.42	3566.79	3294.52	3304.04	4034.16	4026.61	3619.23	-0.406594	9.45186e-10	6.81287e-09	4845.35	3650.37
ARIH2OS	23.4417	31.0739	41.7877	23.4005	42.8644	15.5627	55.1807	68.4097	58.3905	50.7407	47.4913	39.7613	47.6973	40.1023	0.493329	0.0661193	0.107961	32.5137	47.0374
ARL1	1101.13	1394.72	1268.48	1250.79	1153.56	761.375	754.83	481.402	578.936	819.1	415.549	776.957	1143.78	729.862	-0.808894	2.43757e-13	2.98882e-12	1233.74	717.977
ARL10	184.999	240.034	178.698	150.216	179.652	68.2365	79.127	21.5364	37.2705	21.746	40.7068	127.881	52.4671	124.317	-1.68863	8.05855e-18	1.8966e-16	186.72	63.6987
ARL11	937.035	409.364	585.028	826.566	675.115	2412.22	1175.45	2235.99	2400.22	2334.07	2964.81	2311.53	2354.34	1199.06	1.64772	6.87942e-14	9.13712e-13	686.622	2154.19
ARL13A	89.3319	80.6119	40.1382	29.4393	39.0823	52.6738	36.4401	26.6038	23.6047	25.3704	13.5689	80.5972	39.1118	57.1458	-0.547096	0.0266571	0.0487247	55.7207	39.4574
ARL13B	360.495	412.517	335.951	330.626	340.394	271.749	232.175	220.431	260.894	273.033	222.191	195.583	320.526	268.685	-0.506295	8.87397e-06	3.38237e-05	355.997	251.696
ARL14	0	2.25173	4.39871	0.754855	0	0	0	0	1.24235	0	1.69612	0	0	6.01534	-0.570502	0.744	0.802111	1.48106	0.994868
ARL14EP	1338.08	1511.81	1165.66	1243.25	972.014	393.856	614.275	321.779	327.981	450.626	271.379	498.628	886.217	691.765	-1.3896	1.27414e-23	6.45326e-22	1246.16	495.167
ARL14EPL	1.90068	2.25173	3.29903	0	3.1518	0	1.04114	5.06739	0	1.20811	0	0	0.953947	1.00256	-1.36274	0.286719	0.375744	2.12065	1.03035
ARL15	825.528	790.357	877.542	847.702	907.087	1211.5	666.332	1154.1	614.964	964.074	905.727	894.092	1200.07	649.657	0.107068	0.573314	0.657228	849.643	917.834
ARL16	307.276	335.057	330.453	318.549	214.953	435.756	454.98	400.324	319.284	358.809	347.704	358.926	226.085	169.432	0.159444	0.438875	0.532215	301.258	341.256
ARL17A	1341.25	1579.36	1058.99	567.651	768.408	1261.78	1046.35	578.949	947.914	524.321	1975.98	1001.56	1070.33	890.271	-0.0308235	0.91605	0.939193	1063.13	1033.05
ARL2	7.60272	9.45726	6.04822	4.52913	6.93395	4.78852	12.4937	8.86793	9.93881	8.45679	6.78447	3.22389	10.4934	12.0307	0.279276	0.444939	0.538091	6.91426	8.56425
ARL2BP	1749.26	1866.23	1789.17	1903.74	1770.05	1078.61	1228.55	1122.43	1070.91	1063.14	810.744	946.749	1374.64	1097.8	-0.747469	3.60088e-20	1.1812e-18	1815.69	1088.17
ARL3	539.793	389.549	387.636	507.263	494.202	834.4	681.95	730.971	653.477	483.245	1073.64	444.897	541.842	394.005	0.440114	0.0168296	0.0324316	463.689	648.714
ARL4A	577.173	729.56	867.095	802.411	753.28	1814.85	1563.8	2113.1	1875.95	2140.78	2552.66	1385.2	2414.44	2400.12	1.4417	9.38134e-10	6.76461e-09	745.904	2028.99
ARL4C	8174.19	14855.1	18836.9	15669.3	15741.3	2347.57	4787.18	1252.91	808.77	1894.32	2880.01	7917.87	3760.46	3167.08	-2.37307	2.20037e-16	4.32178e-15	14655.4	3201.8
ARL4D	27.2431	31.0739	25.8424	15.852	32.7787	27.534	16.6583	11.4016	24.847	16.9136	16.9612	25.7911	24.8026	3.00767	-0.507203	0.143422	0.210105	26.558	18.6575
ARL5A	2868.76	2847.09	3024.66	2875.24	2605.28	1778.94	1497.17	1567.09	1454.79	1798.88	1368.77	1407.77	2204.57	1729.41	-0.795524	2.39115e-18	6.12063e-17	2844.21	1645.26
ARL5B	2443.01	2249.03	3839.52	3055.65	2851.75	946.931	923.495	1550.62	1644.87	1569.34	2094.71	2019.23	1030.26	3750.57	-0.765686	0.00373306	0.00844173	2887.79	1725.56
ARL5C	6.96916	4.05311	7.69774	8.3034	3.78216	3.59139	2.08229	1.26685	4.9694	0	0	3.22389	10.4934	3.00767	-1.11551	0.0551583	0.0924888	6.16111	3.18166
ARL6	112.14	143.21	101.17	123.796	117.877	64.6451	33.3166	32.938	27.3317	26.5785	27.1379	63.4032	51.5131	55.1406	-1.52515	7.87622e-17	1.64569e-15	119.639	42.445
ARL6IP1	4321.51	4575.06	5053.57	5684.81	5124.19	5839.6	4312.42	4382.02	4518.43	3927.57	5403.83	4259.83	4709.64	3793.68	-0.118984	0.293664	0.382995	4951.83	4571.89
ARL6IP4	666.505	777.297	706.543	654.459	618.383	699.124	816.257	871.591	913.128	704.33	634.348	644.778	610.526	743.897	0.101367	0.508035	0.597468	684.637	737.553
ARL6IP5	9319.03	10016.6	8685.8	11773.5	10350.5	8815.67	8732.08	9222.65	9511.44	6798.05	10047.8	6667	10783.4	6779.29	-0.23746	0.0440664	0.0760176	10029.1	8595.27
ARL6IP6	736.196	615.623	656.507	859.025	787.319	1088.19	989.087	1340.32	1392.68	1019.65	1355.2	874.749	1323.12	590.506	0.566816	6.3212e-05	0.000204077	730.934	1108.17
ARL8A	1289.29	799.814	1040.29	1508.2	1289.09	2543.9	2213.47	4243.94	3985.46	2895.85	4649.06	2698.4	1667.5	2815.18	1.3197	9.73366e-27	7.45449e-25	1185.34	3079.2
ARL8B	2925.14	2843.93	3283.09	3812.02	3512.99	3555.48	2611.19	4183.13	3568.03	3874.42	2622.2	2708.07	4229.8	3672.37	0.0575449	0.715682	0.778386	3275.44	3447.19
ARL9	0	3.15242	1.64952	0.754855	1.89108	0	4.16458	1.26685	1.24235	7.24868	0	0	0.953947	3.00767	0.429173	0.692974	0.759867	1.48957	1.98712
ARMC1	852.138	966.893	891.838	868.083	779.755	418.996	444.569	342.049	284.498	384.18	251.025	452.419	765.065	312.798	-1.14153	3.18814e-18	8.05217e-17	871.741	406.178
ARMC10	670.306	686.778	727.986	723.906	663.769	544.695	465.392	619.488	414.945	415.591	502.051	415.882	704.967	512.307	-0.456499	0.000905411	0.00233838	694.549	510.591
ARMC12	44.9827	37.3787	20.8939	18.8714	19.5411	301.677	210.311	135.553	331.708	253.704	483.394	627.584	272.829	55.1406	3.34446	1.45953e-14	2.14558e-13	28.3336	296.878
ARMC2	508.115	310.739	295.263	367.614	354.262	319.634	458.104	395.256	329.223	253.704	630.956	312.717	277.599	310.793	-0.0361273	0.821746	0.865876	367.199	365.332
ARMC2-AS1	83.6299	32.4249	30.2411	33.2136	49.7984	35.9139	21.864	36.7386	18.6353	39.8677	67.8447	32.2389	26.7105	37.0946	-0.405551	0.171248	0.244237	45.8616	35.212
ARMC3	41.8149	29.2725	22.5434	57.369	43.4948	40.7025	41.6458	38.0054	16.1506	31.4109	78.0214	11.8209	27.6645	23.0588	-0.226707	0.533635	0.621038	38.8989	34.2756
ARMC4	2.53424	2.70208	3.29903	0.754855	0	0	5.20572	1.26685	0	0	1.69612	2.14926	0	2.00511	-0.477612	0.64375	0.718263	1.85804	1.36923
ARMC5	58.2875	94.1223	94.0224	74.7306	49.7984	32.3225	131.184	95.0135	85.7222	74.903	89.8943	87.045	69.6381	135.345	0.27628	0.318415	0.409622	74.1922	89.0076
ARMC6	88.0648	120.242	125.913	89.0729	118.508	65.8422	118.69	124.151	142.87	147.39	93.2865	98.8659	121.151	74.1892	-0.000832141	0.997352	0.997877	108.36	109.604
ARMC7	235.684	179.688	177.598	243.063	223.147	397.447	451.857	736.038	603.783	485.661	517.316	280.478	516.085	381.974	1.13628	6.70262e-20	2.09036e-18	211.836	485.627
ARMC8	2973.93	2818.26	3233.6	3445.91	3152.43	3289.72	2540.39	3073.37	3104.63	2938.13	3524.53	3191.65	3700.36	3064.82	0.0147614	0.884115	0.914597	3124.83	3158.62
ARMC9	22.1746	14.4111	8.79742	15.852	8.82503	5.98565	7.28801	2.53369	4.9694	10.873	5.08835	8.59704	4.76973	10.0256	-1.07821	0.00594787	0.0128082	14.012	6.68116
ARMCX1	25.9759	60.7967	48.3858	43.7816	35.3001	16.7598	15.6172	16.469	19.8776	21.746	10.1767	13.9702	45.7895	21.0537	-1.17791	3.66917e-06	1.49643e-05	42.848	20.1622
ARMCX2	90.599	122.044	100.62	75.4855	51.0591	74.2221	66.6332	31.6712	206.23	22.9541	23.7457	78.448	90.625	76.1944	-0.180658	0.678264	0.747969	87.9616	74.5249
ARMCX3	2029.93	2063.94	2385.75	2407.99	2560.52	2315.25	1663.75	1812.86	2025.03	2425.89	2133.72	2062.21	2655.79	2075.29	-0.102817	0.427498	0.521052	2289.62	2129.98
ARMCX4	961.744	832.69	848.951	687.673	712.937	682.365	652.798	570.081	741.684	607.681	720.85	940.301	838.519	697.78	-0.16539	0.171994	0.245081	808.799	716.895
ARMCX5	567.669	683.625	710.391	574.445	530.132	227.455	270.698	214.097	155.294	270.617	286.644	361.076	418.783	328.839	-1.12682	7.45777e-15	1.1423e-13	613.253	281.5
ARMCX5-GPRASP2	21.541	23.8683	25.8424	15.852	20.1715	16.7598	9.3703	8.86793	4.9694	8.45679	10.1767	5.37315	15.2632	11.0281	-1.12817	5.42512e-05	0.000177501	21.455	10.0295
ARMCX6	556.265	691.281	629.565	632.568	628.468	424.981	433.116	426.927	444.762	582.31	395.196	455.643	606.71	515.314	-0.398934	0.000132736	0.000404923	627.63	476.107
ARMT1	949.706	798.013	735.684	857.515	784.167	1456.91	1207.73	1573.42	1487.09	1582.63	1328.06	749.017	1878.32	828.112	0.643903	0.000158819	0.000476833	825.017	1343.48
ARNT	3916.67	3556.38	3529.41	3912.41	3941.01	4814.86	2795.47	4171.73	5168.18	3687.16	4913.65	4516.67	6212.1	3244.28	0.213099	0.191519	0.267603	3771.18	4391.57
ARNT2	3.1678	0.450346	2.19935	0	0	3.59139	8.32916	1.26685	23.6047	0	3.39224	0	0.953947	1.00256	1.52557	0.193068	0.26949	1.1635	4.68231
ARNTL	4332.28	2751.61	3836.77	4134.34	4727.7	5626.52	3838.7	4430.16	4324.62	3527.69	8451.76	6765.87	3176.64	4607.75	0.285323	0.0153099	0.0298789	3956.54	4972.19
ARNTL2	55.1197	61.247	65.4308	72.4661	64.927	96.9676	60.3864	130.485	125.477	231.958	35.6185	40.8359	153.585	253.647	0.9022	0.0207866	0.0391201	63.8381	125.44
ARPC1A	1347.58	1103.8	1208	1347.42	1361.58	1723.87	1713.72	2379.14	2531.91	2139.57	2286.37	1515.23	1930.79	1879.79	0.629031	9.37987e-22	3.84777e-20	1273.67	2011.15
ARPC1B	1730.25	1595.13	1757.28	2231.35	2210.04	3075.43	3716.89	4878.63	4801.69	3620.71	4954.36	2171.83	2868.52	2901.4	0.882888	1.42005e-10	1.16808e-09	1904.81	3665.49
ARPC2	25742.8	17439.2	21346.9	27617.9	25460.9	34491.7	37185.5	40441.6	40920.6	35976.4	53337.8	28258.5	26791.6	26359.2	0.580674	3.83425e-10	2.94476e-09	23521.5	35973.7
ARPC3	25482.4	16005.3	20222	26621.5	25785.5	33474.2	33403	46457.8	36189.7	33070.9	58405.8	31392.1	30812.5	27535.2	0.659895	4.26285e-10	3.25419e-09	22823.3	36749
ARPC4	5514.5	3911.25	4915.01	6366.45	6248.75	6260.99	7364.01	8353.59	6599.37	6125.13	9652.61	4898.16	5180.89	4492.46	0.248758	0.0286053	0.0518416	5391.19	6547.47
ARPC5	13586.1	9080.77	10115.9	16352.4	15499.9	22055.9	20219	20885.2	30243.8	17898.2	22941.7	14357.1	24677.7	10013.5	0.630669	0.000156544	0.000470971	12927	20365.8
ARPC5L	982.017	957.435	965.516	1430.45	1066.57	1576.62	1433.66	1306.12	1079.6	1405.03	1528.2	1066.03	733.585	1658.23	0.263925	0.138947	0.204512	1080.4	1309.68
ARPIN	1386.86	1865.78	1649.52	1035.66	923.477	658.422	254.039	1455.61	387.613	781.649	437.598	297.672	2233.19	550.404	-1.07134	0.0035631	0.00809593	1372.26	784.022
ARPP19	9465.38	8901.99	9221.89	10212.4	9749.14	8601.39	7855.43	7407.25	6962.13	9059.64	9009.78	7906.05	8557.86	7986.37	-0.220467	0.00934609	0.0191716	9510.17	8149.55
ARPP21	20.9075	6.30484	3.84887	0	0	1.19713	1.04114	0	0	0	0	0	0	0	-4.28924	0.00930005	0.0190958	6.21224	0.248697
ARR3	140.017	162.125	94.0224	131.345	151.917	108.939	62.4687	82.3451	101.873	61.6137	57.668	97.7913	81.0855	92.2353	-0.706055	4.0594e-05	0.000135835	135.885	82.891
ARRB1	9154.94	11137.1	9888.85	9465.88	10865.5	5347.58	4788.22	5112.99	4061.25	5744.58	4513.37	4007.29	5746.58	4767.16	-1.04508	3.12198e-07	1.50573e-06	10102.4	4898.78
ARRB2	23723.6	13394.2	18974.4	27006.4	25250.9	48747.2	41964.4	65626.5	67432.3	47378.6	75614.6	47216	36721.2	39547.9	1.24202	6.07663e-55	1.92356e-51	21669.9	52249.9
ARRDC1	232.516	254.445	228.183	229.476	262.23	555.469	617.399	865.257	693.232	502.575	849.755	593.196	372.039	456.164	1.28847	2.71913e-08	1.56641e-07	241.37	611.676
ARRDC1-AS1	115.308	134.203	139.109	98.1311	138.679	128.093	135.349	87.4124	111.812	100.273	98.3749	95.6421	88.7171	84.2148	-0.273092	0.108386	0.165254	125.086	103.321
ARRDC2	2453.14	3091.17	2511.11	2259.28	2559.26	2254.2	2650.75	2144.77	2115.72	1736.06	1763.96	4123.35	1897.4	1769.51	-0.185379	0.230588	0.312826	2574.79	2272.86
ARRDC3	8465.62	4278.29	10148.4	11482.1	9024.23	11304.5	6310.38	5833.83	7886.44	7321.16	9642.43	7150.59	7532.37	3963.11	-0.215093	0.306005	0.396477	8679.72	7438.31
ARRDC3-AS1	191.335	163.476	142.958	160.029	140.57	161.613	144.719	152.022	152.809	190.882	149.258	193.433	94.4407	122.312	-0.0872828	0.519733	0.608287	159.674	151.277
ARRDC4	3284.37	1937.84	2398.95	3254.18	1860.19	2470.88	2324.88	3018.9	1622.51	1884.66	1982.76	1254.09	2499.34	4844.36	-0.0699117	0.823362	0.867098	2547.11	2433.6
ARRDC5	186.267	162.575	164.952	132.1	153.177	164.007	181.159	105.148	156.536	153.43	210.319	309.493	364.408	112.286	0.274011	0.260949	0.347585	159.814	195.199
ARSA	912.959	742.62	675.202	658.988	852.246	1033.12	1314.97	971.672	1105.69	865.009	1940.36	1143.41	574.276	920.348	0.452595	0.0257002	0.0471617	768.403	1096.54
ARSB	923.73	708.844	1092.53	1139.83	1151.04	1209.1	889.137	2181.51	2589.06	1386.91	831.098	1218.63	1837.3	1754.48	0.581987	0.0063934	0.0136776	1003.19	1544.14
ARSD	1028.27	933.117	1117.27	932.246	1304.84	1266.56	1120.27	1276.98	1708.23	1095.76	1039.72	773.733	2257.04	852.174	0.182532	0.283163	0.371786	1063.15	1265.61
ARSG	1065.01	667.413	714.79	951.117	873.048	1252.2	1025.53	985.607	1284.59	1009.98	2929.2	1372.3	1269.7	718.834	0.58189	0.0168779	0.0324949	854.276	1316.44
ARSJ	2.53424	8.55657	25.8424	2.26456	4.41252	0	10.4114	1.26685	1.24235	2.41623	1.69612	3.22389	13.3553	1.00256	-1.35403	0.061081	0.100765	8.72206	3.84608
ARSK	118.476	176.986	141.858	153.99	121.029	87.3906	66.6332	32.938	57.1481	76.1111	50.8835	78.448	140.23	64.1637	-1.00851	8.35303e-08	4.4303e-07	142.468	72.6607
ART1	1.90068	0.450346	3.29903	3.01942	2.52144	5.98565	7.28801	6.33424	7.45411	2.41623	27.1379	11.8209	2.86184	7.0179	1.7783	0.00245018	0.0057623	2.23818	8.70187
ART3	6.96916	1.80138	4.94855	2.26456	10.7161	2.39426	3.12343	1.26685	2.4847	0	1.69612	16.1194	1.90789	13.0332	-0.650929	0.286115	0.375081	5.33995	4.66955
ARTN	0	1.80138	2.19935	0	0.63036	2.39426	1.04114	0	0	2.41623	0	4.29852	1.90789	1.00256	0.54401	0.564477	0.649746	0.926219	1.45118
ARV1	140.017	188.245	159.453	175.126	112.834	233.441	206.147	238.167	228.593	256.12	145.866	141.851	337.697	162.414	0.451042	0.00374624	0.00846851	155.135	216.7
ARVCF	13.3048	23.418	25.2926	6.03884	17.6501	11.9713	32.2755	5.06739	19.8776	10.873	20.3534	33.3135	23.8487	30.0767	0.299594	0.535706	0.622994	17.1408	20.8508
ASAH1	15960.6	14496.6	17054.9	24384.1	25115.4	28828.1	30997	27138.4	23302.8	31609.1	51872.4	30607.6	20169.3	14741.6	0.531071	0.00173381	0.00421734	19402.3	28807.4
ASAH2	2.53424	4.50346	7.1479	2.26456	0	0	0	0	0	1.20811	1.69612	0	1.90789	0	-2.62501	0.0213051	0.0400126	3.29003	0.534681
ASAH2B	31.678	37.8291	25.8424	16.6068	39.7126	7.18279	5.20572	6.33424	3.72705	1.20811	1.69612	12.8956	17.171	9.02302	-2.16152	1.83068e-09	1.25933e-08	30.3338	7.1604
ASAP1	11279.9	3752.73	5637.49	9593.45	8362.35	14207.5	10530.1	23082	30124.5	13888.5	21238.8	11483.5	12533.9	17701.2	1.15203	2.10199e-08	1.2303e-07	7725.18	17198.9
ASAP1-IT1	3.1678	0.900692	3.84887	4.52913	2.52144	2.39426	12.4937	5.06739	13.6659	3.62434	10.1767	7.52241	1.90789	5.01279	1.18243	0.020502	0.0386404	2.99359	6.87393
ASAP1-IT2	22.8081	9.45726	17.045	21.1359	25.8447	59.8565	81.2093	92.4798	147.84	31.4109	115.336	50.5076	28.6184	120.307	2.05085	4.0376e-11	3.57205e-10	19.2582	80.8406
ASAP2	223.647	235.081	312.308	335.156	465.836	328.014	438.322	238.167	94.4187	364.85	352.793	77.3733	352.96	368.941	-0.101544	0.792296	0.841756	314.405	290.649
ASAP3	29.1437	22.0669	30.2411	32.4588	18.9108	27.534	18.7406	43.0728	22.3623	37.4515	8.48059	155.821	17.171	28.0716	0.429083	0.368299	0.461235	26.5643	39.8562
ASB1	1905.75	1940.54	1630.27	1641.05	1693.15	1449.73	1489.88	1607.63	1418.76	1112.67	1696.12	1717.26	1787.7	1196.05	-0.23337	0.038888	0.0681805	1762.15	1497.31
ASB11	1.26712	0.450346	0	0	0	0	2.08229	0	1.24235	0	1.69612	3.22389	2.86184	3.00767	1.97564	0.0823667	0.130388	0.343493	1.56824
ASB12	13.3048	5.8545	6.04822	6.03884	7.56431	3.59139	6.24687	0	1.24235	3.62434	1.69612	15.0448	0.953947	14.0358	-1.09038	0.0506956	0.0859281	7.76213	5.15951
ASB13	181.198	306.686	191.894	217.398	170.827	165.204	174.912	178.625	142.87	102.69	83.1098	76.2987	274.737	53.1355	-0.705771	0.00120618	0.00303469	213.601	139.065
ASB14	396.608	462.956	439.871	447.629	327.157	281.326	173.871	169.758	255.924	169.136	145.866	474.986	286.184	268.685	-0.771246	3.85512e-05	0.000129662	414.844	247.304
ASB15	7.60272	4.50346	6.59806	9.81311	3.1518	1.19713	4.16458	6.33424	8.69646	3.62434	3.39224	7.52241	1.90789	32.0818	0.261666	0.657064	0.730016	6.33383	7.6579
ASB16	562.601	501.685	460.765	408.377	418.559	532.723	340.454	304.043	314.315	403.51	551.238	560.957	540.888	349.892	-0.115148	0.522081	0.610321	470.397	433.113
ASB16-AS1	395.341	340.462	318.357	216.643	338.503	527.935	417.499	437.062	539.18	419.215	483.394	614.688	551.381	389.995	0.601212	2.69798e-05	9.33213e-05	321.861	486.705
ASB2	34.8458	51.3394	47.2861	59.6335	87.62	14.3656	21.864	10.1348	12.4235	31.4109	5.08835	10.7463	14.3092	17.0435	-1.90442	4.70442e-08	2.59289e-07	56.145	15.2651
ASB3	22.1746	33.3256	24.7427	24.9102	29.6269	49.0824	44.7692	13.9353	18.6353	22.9541	35.6185	23.6419	12.4013	32.0818	0.037337	0.8912	0.920272	26.956	28.1244
ASB6	520.152	507.54	539.392	655.214	672.594	897.848	1035.94	891.86	864.676	961.658	1183.89	1074.63	559.967	641.637	0.6123	6.68585e-06	2.6032e-05	578.978	901.345
ASB7	2098.98	1459.57	1735.29	1991.31	1891.08	2431.37	2214.51	2870.68	3072.33	2155.27	3327.78	2362.04	2274.21	2445.24	0.473557	3.43241e-07	1.64046e-06	1835.25	2572.6
ASB8	3011.94	2303.52	2414.34	2691.81	3053.46	2958.11	2941.23	3893.02	3741.96	3887.71	4153.79	3327.05	3608.78	3118.96	0.374317	5.23322e-05	0.000171636	2695.02	3514.51
ASB9	32.9451	18.4642	32.4405	16.6068	25.2144	19.1541	17.6995	10.1348	22.3623	2.41623	6.78447	11.8209	20.0329	22.0563	-0.820089	0.0437431	0.0755147	25.1342	14.7179
ASB9P1	32.9451	5.8545	14.2958	21.1359	12.6072	153.233	56.2218	183.693	213.684	223.501	230.672	103.164	73.4539	153.391	3.14791	9.64225e-24	5.0174e-22	17.3677	154.557
ASCC1	791.316	756.131	812.112	762.403	786.689	1511.98	1035.94	1480.94	1311.92	1304.76	1400.99	1461.5	1883.09	797.033	0.794581	1.53185e-05	5.55978e-05	781.73	1354.24
ASCC2	1386.23	1469.93	1458.72	1384.4	1511.6	1143.26	1245.21	1610.16	1304.47	1500.48	1153.36	1280.96	1425.2	1337.41	-0.118831	0.212585	0.29256	1442.18	1333.39
ASCC3	2387.89	3114.59	3285.84	3284.37	3087.5	1300.08	1322.25	1350.46	1070.91	1608	673.359	2183.65	1635.07	2147.48	-1.06626	1.10539e-11	1.06843e-10	3032.04	1476.81
ASCL2	11.4041	21.1663	14.2958	12.0777	17.0197	9.57705	37.4812	48.1402	22.3623	26.5785	22.0495	13.9702	28.6184	22.0563	0.690619	0.0163063	0.03158	15.1927	25.6482
ASCL3	1.90068	4.05311	0	3.01942	1.89108	1.19713	1.04114	0	1.24235	0	0	1.07463	3.81579	1.00256	-1.22358	0.172938	0.246167	2.17286	1.04151
ASF1A	590.478	675.969	504.202	660.498	449.446	239.426	279.027	176.092	165.233	254.912	162.827	202.03	503.684	194.496	-1.3128	1.11262e-13	1.43951e-12	576.119	241.97
ASF1B	302.842	113.037	215.537	224.947	277.358	381.885	475.803	342.049	188.837	304.444	451.167	192.359	248.98	95.2429	0.381008	0.208591	0.287982	226.744	297.863
ASGR1	25.3424	48.6374	31.8906	46.801	57.3627	50.2795	48.9338	97.5472	60.8752	50.7407	27.1379	16.1194	90.625	76.1944	0.334011	0.224212	0.3061	42.0068	57.6059
ASGR2	173.595	199.053	266.122	277.787	288.074	557.863	804.805	2285.39	1252.29	585.935	776.822	449.195	694.473	805.053	1.77976	8.30323e-12	8.19663e-11	240.926	912.425
ASH1L	10226.9	8630.43	9716.2	10371	9463.59	7699.95	5643	7294.51	8331.21	7057.79	7717.34	9828.56	7705.98	8851.58	-0.311588	0.00269528	0.00628502	9681.62	7792.21
ASH1L-AS1	79.8285	63.4988	87.9742	44.5364	81.9467	57.4623	92.6619	89.9461	90.6916	77.3192	72.9331	70.9256	62.0066	137.35	0.225803	0.350054	0.442001	71.5569	83.4774
ASH2L	1439.45	1324.02	1253.63	1192.67	1383.01	1704.71	1505.49	2163.77	2381.59	2021.17	1635.06	1527.05	2289.47	1492.81	0.468429	8.95422e-05	0.000281615	1318.56	1857.9
ASIC1	13.3048	28.3718	13.746	15.0971	15.1286	10.7742	14.576	3.80054	6.21175	3.62434	6.78447	15.0448	4.76973	27.069	-0.812009	0.0493585	0.0839798	17.1296	10.295
ASIC3	55.1197	60.7967	47.836	36.9879	42.8644	55.068	56.2218	39.2723	67.087	45.9083	42.403	60.1793	38.1579	83.2123	0.16977	0.530556	0.618363	48.7209	54.1677
ASIC4	0	2.25173	0	0	0.63036	3.59139	1.04114	5.06739	3.72705	1.20811	0	0	0.953947	1.00256	1.36845	0.255628	0.34155	0.576418	1.84351
ASIP	6.96916	0.900692	1.64952	9.81311	2.52144	2.39426	2.08229	0	3.72705	0	0	4.29852	0	4.01023	-1.28985	0.114438	0.173147	4.37078	1.83471
ASL	341.489	285.519	342	373.653	426.123	723.067	803.763	604.286	793.862	791.314	975.268	637.256	490.329	332.849	0.924456	9.87323e-06	3.73253e-05	353.757	683.555
ASNA1	425.752	506.639	512.45	450.648	550.304	417.799	633.016	871.591	701.928	742.989	585.161	396.538	538.026	766.956	0.329336	0.0797903	0.126968	489.159	628.223
ASNS	1637.75	1693.3	785.169	1368.55	842.16	931.368	1277.48	610.62	884.554	735.741	1080.43	890.868	915.789	1395.56	-0.37405	0.0869597	0.136611	1265.39	969.157
ASNSD1	2331.5	1613.14	1606.08	1770.89	1703.86	2048.29	1838.66	2992.29	2690.93	1691.36	2790.11	1268.06	1807.73	1706.35	0.152807	0.323794	0.415275	1805.09	2092.64
ASPDH	50.0512	97.2747	78.0771	74.7306	35.9305	40.7025	33.3166	22.8032	57.1481	26.5785	27.1379	48.3583	82.9934	37.0946	-0.671735	0.0151036	0.0295095	67.2128	41.7926
ASPH	3458.6	1122.26	1513.71	3109.25	1614.98	16060.7	6301.01	6055.53	16171.7	14276.3	34168.3	16853.4	10857.8	3184.12	2.62449	1.61458e-10	1.31669e-09	2163.76	13769.9
ASPHD1	2.53424	1.35104	2.19935	0.754855	1.89108	7.18279	2.08229	5.06739	12.4235	6.04056	0	2.14926	10.4934	7.0179	1.63007	0.0129999	0.0258	1.74611	5.82857
ASPHD2	129.88	190.947	191.894	193.998	213.062	155.627	148.884	254.636	301.891	240.414	161.131	130.03	226.085	260.665	0.15286	0.404365	0.497964	183.956	208.818
ASPM	81.7292	65.3002	130.862	152.481	121.659	184.358	396.676	140.62	252.197	740.573	140.778	113.911	452.171	325.831	1.37318	0.00277573	0.00645361	110.406	305.235
ASPN	0.63356	2.25173	1.64952	0	0	2.39426	2.08229	0	4.9694	2.41623	0	4.29852	0	4.01023	1.42993	0.137863	0.203168	0.906961	2.24121
ASPRV1	500.512	182.39	294.164	421.209	357.414	1446.13	1819.92	2846.61	2425.07	2425.89	2912.23	1071.41	1082.73	859.192	2.33267	3.04594e-34	6.97007e-32	351.138	1876.58
ASPSCR1	48.7841	72.5057	81.3761	46.0462	67.4485	74.2221	114.526	126.685	109.327	125.644	89.8943	77.3733	70.5921	89.2276	0.605542	0.026964	0.0492478	63.2321	97.499
ASRGL1	238.218	214.365	245.228	304.207	337.873	130.487	203.023	184.96	231.077	224.709	132.297	47.2837	240.395	175.448	-0.717415	0.000619605	0.00165889	267.978	174.409
ASS1	0	0	1.09968	0	0	8.37992	0	0	3.72705	0	1.69612	1.07463	2.86184	7.0179	3.5082	0.0209977	0.0394822	0.219935	2.75083
ASTE1	434.622	439.087	445.919	341.194	399.648	233.441	276.944	217.898	327.981	332.231	249.329	275.105	488.421	394.005	-0.421194	0.00202528	0.00485316	412.094	310.595
ASTL	6.3356	12.6097	34.09	18.1165	23.9537	5.98565	11.4526	2.53369	2.4847	2.41623	5.08835	31.1643	2.86184	3.00767	-1.79757	0.000209741	0.000613428	19.0211	7.44389
ASTN2	22.1746	35.5773	41.2379	32.4588	19.5411	16.7598	14.576	6.33424	6.21175	7.24868	1.69612	6.44778	12.4013	21.0537	-1.55526	7.85328e-06	3.02244e-05	30.1979	10.3033
ASTN2-AS1	5.06848	5.8545	0	0.754855	0.63036	2.39426	4.16458	0	2.4847	1.20811	1.69612	3.22389	4.76973	10.0256	0.392024	0.597879	0.678387	2.46164	3.32966
ASUN	661.436	767.84	732.385	779.765	740.672	654.831	580.959	475.068	463.397	569.021	344.312	550.21	934.868	692.767	-0.361176	0.00111326	0.00282411	736.42	585.048
ASXL1	5475.22	5197.44	5456.05	5394.95	4909.87	4078.63	3887.63	3882.89	3336.95	4074.96	4104.61	4637.03	3976.05	5702.55	-0.335239	0.000146724	0.000443816	5286.71	4186.81
ASXL2	4283.5	3640.6	3996.78	4529.88	4539.22	2199.13	1687.7	1977.55	2743.11	2247.09	2589.97	2914.4	3017.33	2702.89	-0.775056	6.95301e-09	4.39024e-08	4197.99	2453.24
ASXL3	1.26712	0	0.549839	2.26456	7.56431	2.39426	5.20572	3.80054	0	3.62434	15.2651	2.14926	0	5.01279	0.78556	0.354188	0.446182	2.32917	4.16133
ATAD1	1946.3	2070.69	2080.04	1788.25	1895.49	1577.82	1196.27	1227.57	1369.07	1541.55	1487.5	1723.71	1697.07	1545.94	-0.388672	0.000295207	0.000838599	1956.15	1485.17
ATAD2	987.086	1037.6	1220.09	1133.79	1039.46	730.25	1051.56	608.087	836.102	1071.6	486.786	1150.93	1044.57	1062.71	-0.301106	0.0909942	0.142243	1083.61	893.621
ATAD2B	1894.34	1806.79	2043.75	1900.72	1940.25	1862.74	1499.25	1873.67	2502.09	1627.33	1752.09	1907.47	3000.16	1877.79	0.0430699	0.749622	0.807027	1917.17	1989.18
ATAD3A	20.2739	31.5242	18.1447	15.852	32.1483	25.1397	38.5223	34.2049	32.3011	48.3245	33.9224	24.7165	28.6184	38.0972	0.506407	0.0566205	0.0945651	23.5886	33.7608
ATAD3B	54.4861	84.2147	71.479	41.517	61.1449	52.6738	114.526	63.3424	72.0564	103.898	47.4913	79.5226	43.8816	117.299	0.329313	0.259375	0.345828	62.5683	77.1879
ATAD3C	12.6712	10.358	26.3923	24.9102	11.9768	9.57705	14.576	8.86793	4.9694	13.2892	13.5689	31.1643	7.63158	8.02046	-0.584941	0.0980944	0.151645	17.2617	12.4072
ATAD5	529.022	589.953	469.012	485.372	462.054	336.394	425.828	300.243	373.948	469.956	220.495	380.419	493.191	331.846	-0.457918	0.00743699	0.0156476	507.083	370.258
ATAT1	288.903	292.274	280.967	250.612	290.596	332.802	318.59	243.235	267.105	233.166	378.234	367.523	304.309	323.826	0.128598	0.150664	0.219042	280.671	307.643
ATE1	1568.06	1627.55	1502.71	1557.27	1611.2	1127.7	1261.87	1169.3	1145.45	1032.94	1060.07	1245.5	1460.49	1270.24	-0.392979	8.00987e-07	3.62909e-06	1573.36	1197.06
ATE1-AS1	12.0376	8.55657	7.1479	3.77427	2.52144	7.18279	7.28801	20.2696	13.6659	14.4974	11.8728	4.29852	8.58552	17.0435	0.662157	0.164902	0.236555	6.80756	11.6338
ATF1	998.49	972.747	1046.89	1020.56	830.814	960.099	840.204	891.86	859.707	921.79	771.734	974.689	1444.28	897.289	-0.042908	0.743359	0.801556	973.901	951.294
ATF2	3412.99	2728.65	3027.96	2816.36	3039.59	3917.01	3099.49	3910.76	3462.43	3617.09	4029.98	3136.84	3257.73	3784.65	0.24959	0.00785312	0.0164357	3005.11	3579.55
ATF3	109.606	152.667	317.257	218.153	205.497	162.81	187.406	1223.77	530.484	213.836	178.092	79.5226	123.059	2540.48	1.53523	0.0235305	0.0436271	200.636	582.163
ATF4	10073.6	8376.43	9547.4	11955.4	10499.9	16880.7	16057.6	18953.3	13417.4	17112.9	16143.7	11788.7	9047.23	13135.5	0.526137	2.50914e-05	8.74263e-05	10090.5	14726.3
ATF5	221.112	264.803	396.434	462.726	289.965	195.132	189.488	744.906	274.56	514.656	149.258	243.941	294.77	615.57	0.0961508	0.755319	0.811734	327.008	358.031
ATF6	6234.23	4061.67	4630.19	6732.55	5361.21	7647.27	4441.52	8694.37	9569.83	7271.63	13857.3	7414.95	6954.27	6366.24	0.529056	0.000749335	0.00197387	5403.97	8024.15
ATF6B	2702.77	2699.82	2981.77	2941.67	3059.77	3080.22	3957.39	4083.05	4503.52	3434.66	4274.22	3209.92	2834.18	3166.08	0.308373	0.042	0.0728565	2877.16	3615.91
ATF7	2223.79	2166.16	1956.33	2309.86	2318.46	3037.12	2280.11	3150.65	3493.49	3010.62	2856.26	3134.7	3327.37	2771.07	0.451613	2.06505e-05	7.3147e-05	2194.92	3006.82
ATF7IP	16391.5	13215.4	14435.5	15178.6	15025.2	14089	13369.3	12031.2	15585.3	14162.7	12081.4	15885.2	10268.3	12975.1	-0.146939	0.160434	0.231319	14849.2	13383.1
ATF7IP2	1136.61	1242.95	1040.84	673.331	746.976	536.315	603.864	287.574	330.465	320.15	368.058	679.166	560.921	905.309	-0.941382	9.04438e-12	8.85488e-11	968.142	510.202
ATG10	219.212	206.709	212.238	261.935	269.164	323.225	263.41	402.857	291.952	385.388	340.92	173.015	233.717	321.821	0.349377	0.0128247	0.0255004	233.851	304.034
ATG101	108.972	180.589	170.45	199.282	177.131	154.43	236.34	323.046	245.985	250.079	212.015	183.762	269.013	185.473	0.432834	0.00806325	0.0168236	167.285	228.905
ATG12	3343.29	3044.79	3430.99	3513.85	3334.6	3073.04	2581	3595.31	3628.91	3184.58	3867.15	2896.13	3330.23	2893.38	-0.0607478	0.459849	0.552744	3333.51	3227.75
ATG13	2823.14	2233.27	2824.52	2876.75	2991.69	3193.95	3304.59	3936.09	3932.04	3786.22	4226.73	3125.02	3317.83	3477.87	0.372109	4.77561e-11	4.1818e-10	2749.87	3588.93
ATG14	2838.98	3049.29	3111.54	2907.7	3035.81	1610.14	1791.81	1683.64	1448.58	1701.02	1572.3	2172.9	1837.3	2536.47	-0.717914	2.08533e-10	1.67612e-09	2988.66	1817.13
ATG16L1	2151.57	2273.35	2380.8	2284.19	2363.22	2093.78	1978.17	1736.85	1569.09	1773.51	1808.06	2658.63	1541.58	1855.73	-0.283946	0.000205585	0.000601922	2290.62	1890.6
ATG16L2	7673.04	3489.28	5108	6066.77	7358.82	20405.1	20909.3	20946	26204.9	18554.2	30284.2	15366.1	8669.47	10919.9	1.63351	1.92911e-14	2.76108e-13	5939.18	19139.9
ATG2A	1024.47	522.401	1217.89	1160.21	1728.45	1563.45	2477.92	1612.7	1579.03	2429.51	5191.82	4742.34	625.789	2163.52	0.970844	0.000949387	0.00243837	1130.68	2487.34
ATG2B	5433.41	5468.1	5126.69	5670.47	5518.8	5275.76	4231.21	4288.28	4109.7	4757.55	6005.95	6199.54	4971.02	3516.97	-0.182044	0.121591	0.182329	5443.49	4817.33
ATG3	4455.82	3091.62	3973.13	5045.45	4660.88	7091.8	5799.17	10732.7	10184.8	6793.22	7082.99	4251.24	5100.75	8382.38	0.739351	1.31928e-07	6.77402e-07	4245.38	7268.79
ATG4A	502.413	642.193	618.568	671.821	637.924	537.512	503.914	497.871	514.333	829.973	500.355	428.777	695.427	617.575	-0.116125	0.424596	0.518374	614.584	569.526
ATG4B	862.275	866.466	917.131	976.027	933.562	875.103	1146.3	1000.81	893.25	896.42	1233.08	1055.29	1021.68	781.995	0.116733	0.409561	0.503221	911.092	989.324
ATG4C	343.389	475.115	489.906	471.029	443.773	393.856	283.191	220.431	325.496	345.52	186.573	266.508	735.493	237.606	-0.49059	0.0097516	0.0199196	444.643	332.742
ATG4D	195.77	141.859	184.746	229.476	228.821	245.412	289.438	466.2	455.943	358.809	676.751	511.524	136.414	560.43	0.978778	0.000152821	0.000460857	196.134	411.213
ATG5	1279.79	1328.52	1232.19	1442.53	1378.6	1404.23	1251.46	1670.97	1321.86	1427.99	1345.02	1150.93	1243.95	1322.37	0.00779008	0.919862	0.942033	1332.32	1348.75
ATG7	1579.46	1233.95	1392.19	2461.58	1762.49	2546.3	1835.54	3131.65	3180.42	2744.83	3266.72	1625.91	2544.18	2016.14	0.560425	8.15714e-06	3.1305e-05	1685.93	2543.52
ATG9A	1413.47	1039.4	1527.45	1491.59	1487.02	4211.51	2560.17	2631.24	3001.52	3022.7	4969.63	4134.1	1944.14	1368.49	1.10237	1.59045e-07	8.0596e-07	1391.79	3093.72
ATG9B	91.8661	54.4919	44.5369	37.7427	35.9305	17.957	70.7978	16.469	9.93881	13.2892	20.3534	31.1643	18.125	48.1227	-1.00476	0.00476634	0.0105111	52.9136	27.3575
ATHL1	3020.18	2671.45	1429.58	1890.91	1510.97	9474.09	10031.4	6393.78	14975.3	11257.2	16618.6	7827.6	3232.93	7999.4	2.1088	1.74615e-12	1.90383e-11	2104.62	9756.7
ATIC	1111.26	1294.74	996.307	963.95	965.711	762.572	856.862	420.593	408.733	878.298	400.284	690.987	907.204	770.967	-0.672786	5.32581e-07	2.47985e-06	1066.4	677.389
ATL1	108.972	114.388	97.8713	151.726	165.154	130.487	127.02	83.6119	40.9976	97.8571	71.237	59.1046	98.2565	55.1406	-0.591331	0.0395193	0.0691406	127.622	84.8569
ATL2	2036.89	1764.46	1981.07	1801.08	2032.28	2045.9	1668.95	1198.44	1488.34	1420.74	2479.72	2166.45	1521.55	1329.39	-0.191135	0.111269	0.169039	1923.16	1702.16
ATL3	2580.49	2759.27	2381.35	2814.1	2454.62	1687.95	1814.71	1753.32	2103.3	1711.9	1555.34	1712.96	3381.74	1867.76	-0.438553	0.0001238	0.000379309	2597.97	1954.33
ATM	38064.3	36056.9	36617.6	29223.5	30619.1	14230.3	19136.2	10053.7	11346.4	13485	13097.4	23256.1	20838	17465.5	-1.12189	1.09548e-29	1.1689e-27	34116.3	15878.7
ATMIN	2255.47	3129.45	3047.21	2910.72	2913.52	1668.8	1883.43	1674.77	1393.92	1659.95	1222.9	1793.56	1991.84	1725.4	-0.773984	8.56093e-10	6.22265e-09	2851.27	1668.29
ATN1	451.728	580.496	595.475	449.894	518.156	318.437	415.417	276.173	524.272	259.744	169.612	536.24	338.651	556.419	-0.459194	0.0547778	0.0918833	519.15	377.218
ATOH7	0.63356	0	0	0	0	4.78852	10.4114	8.86793	1.24235	4.83245	1.69612	3.22389	0.953947	2.00511	4.67749	4.74703e-05	0.000156855	0.126712	4.22464
ATOH8	105.171	27.0208	49.4855	30.1942	77.5342	143.656	12.4937	35.4717	90.6916	82.1517	161.131	269.732	62.9605	43.11	0.748893	0.198348	0.275886	57.8811	100.155
ATOX1	352.893	444.491	462.964	430.267	479.704	265.763	471.638	641.025	475.82	549.691	371.45	363.225	540.888	542.383	0.0895098	0.556669	0.642725	434.064	469.098
ATP10A	563.235	884.93	801.115	528.398	868.005	302.874	764.2	414.259	427.369	373.307	251.025	539.464	694.473	952.429	-0.511308	0.0633792	0.103988	729.136	524.378
ATP10B	5.70204	4.95381	6.59806	4.52913	10.0858	2.39426	0	1.26685	0	1.20811	0	8.59704	2.86184	3.00767	-2.00071	0.00119691	0.00301537	6.37376	2.14842
ATP10D	1599.1	1686.1	1554.39	1520.28	1590.4	1177.98	781.899	1241.51	1185.2	1036.56	583.465	961.794	1849.7	1243.17	-0.548082	0.000216806	0.000632181	1590.05	1117.92
ATP11A	5501.2	3560.43	4557.61	5719.54	5938.62	7115.75	6478	7556.74	9949.99	7908.31	12071.3	8910.83	8405.23	6484.54	0.712197	4.14031e-08	2.30472e-07	5055.48	8320.07
ATP11A-AS1	22.8081	6.30484	14.8456	10.568	21.4322	77.8135	22.9052	63.3424	100.63	84.5679	123.817	54.8061	14.3092	65.1662	2.03614	1.04685e-09	7.49166e-09	15.1918	67.4842
ATP11AUN	5.70204	6.75519	1.64952	5.28398	7.56431	17.957	5.20572	3.80054	17.3929	19.3298	6.78447	9.67167	6.67763	12.0307	1.01858	0.0274239	0.0499434	5.39101	10.9834
ATP11B	12407.6	8758.78	9990.57	12920.9	11630.8	14784.6	10212.6	18012	27533	17079.1	28691.5	17367.1	19611.2	12552	0.695369	0.000213517	0.00062361	11141.7	18427
ATP11C	2024.22	1767.16	1998.66	1909.03	1819.22	1288.11	1208.77	1885.07	1658.54	1362.75	1180.5	1505.56	1770.53	1550.96	-0.358166	0.00127415	0.00318923	1903.66	1490.09
ATP13A1	449.827	570.138	510.25	401.583	428.644	529.132	608.028	823.451	888.281	770.776	420.637	612.539	599.079	746.905	0.497924	0.0116622	0.0233945	472.089	666.536
ATP13A2	151.421	201.305	148.456	139.648	150.656	148.444	192.612	190.027	221.138	120.811	128.905	125.732	137.368	176.45	0.0165659	0.93752	0.955479	158.297	160.165
ATP13A3	3722.8	4810.14	4430.05	5510.44	4618.01	2843.19	2446.69	3262.13	2751.81	3248.61	2557.75	3241.08	4337.6	3697.43	-0.555174	0.000782399	0.00205165	4618.29	3154.03
ATP13A4	70.3251	265.254	40.1382	159.274	102.749	195.132	77.0447	43.0728	39.7552	112.354	76.3253	111.762	103.98	156.399	-0.316193	0.371499	0.464447	127.548	101.758
ATP13A4-AS1	1.90068	4.95381	2.19935	0.754855	6.93395	1.19713	0	1.26685	0	0	0	2.14926	0	4.01023	-2.12646	0.027476	0.050005	3.34853	0.958163
ATP13A5	0.63356	4.95381	3.29903	6.03884	5.67324	8.37992	3.12343	2.53369	0	3.62434	25.4418	0	0.953947	0	-0.576279	0.502886	0.592807	4.11969	4.89523
ATP13A5-AS1	1.90068	2.25173	1.64952	5.28398	4.41252	2.39426	0	0	3.72705	0	6.78447	0	3.81579	0	-0.927322	0.268895	0.356469	3.09969	1.85795
ATP1A1	7301.77	8123.34	9008.55	10555.1	7626.72	3542.31	5077.66	6449.52	4412.83	5134.48	4214.85	4018.04	5779.01	6950.73	-0.761043	7.0676e-07	3.2338e-06	8523.11	5064.38
ATP1A1-AS1	57.0204	51.3394	54.434	58.8787	40.343	44.2938	59.3452	87.4124	49.694	66.4462	86.502	46.2091	55.3289	116.297	0.367341	0.131447	0.195044	52.4031	67.9476
ATP1A2	8.23628	3.60277	1.64952	1.50971	8.82503	0	0	0	0	0	0	0	0	0	-4.51862	0.000242006	0.000698013	4.76466	0
ATP1A3	66.5238	107.633	90.1735	90.5826	138.049	43.0967	65.5921	32.938	33.5435	56.7813	35.6185	59.1046	37.2039	49.1253	-1.10509	0.000874969	0.00226685	98.5923	45.8893
ATP1A4	93.7668	59.4457	1.09968	0.754855	3.78216	3.59139	41.6458	36.7386	29.8164	0	40.7068	23.6419	83.9473	43.11	0.0130561	0.989997	0.993082	31.7698	33.6887
ATP1B1	149.52	218.418	157.254	278.541	163.263	93.3762	44.7692	64.6092	14.9082	94.2328	33.9224	31.1643	40.0658	71.1816	-1.83195	1.17264e-05	4.36363e-05	193.399	54.2477
ATP1B2	3.1678	0	3.84887	0.754855	1.89108	5.98565	4.16458	43.0728	8.69646	6.04056	3.39224	7.52241	5.72368	10.0256	2.25715	0.00206827	0.00494611	1.93252	10.5138
ATP1B3	1447.05	2508.88	2891.6	2909.97	2533.41	1689.15	1639.8	2852.94	1816.32	2365.48	1334.85	2185.8	1750.49	1605.09	-0.356521	0.0552718	0.0926149	2458.18	1915.55
ATP2A1	46.8834	43.2332	50.0353	41.517	56.102	190.344	117.649	179.892	147.84	124.436	150.955	96.7167	74.4079	100.256	1.41659	6.27007e-14	8.37464e-13	47.5542	131.388
ATP2A2	4978.51	6465.17	6453.46	7318.32	6164.29	4662.83	4108.36	5647.6	4472.46	5167.1	3360.01	5200.13	5998.42	7548.25	-0.29639	0.0298477	0.0538568	6275.95	5129.46
ATP2A3	2675.52	2319.73	2223	2312.88	2859.31	4668.81	5504.53	4012.1	5535.92	4138.99	6670.83	4476.91	2583.29	2914.43	0.818454	1.19321e-05	4.43322e-05	2478.09	4500.65
ATP2B1	13728.6	9719.82	13004.2	17863.6	13097.6	9020.38	6763.27	8442.27	5483.74	7533.79	11874.5	11931.6	4522.66	13167.6	-0.664787	0.000191617	0.000564683	13482.8	8748.87
ATP2B2	4.43492	3.15242	1.64952	5.28398	8.19467	13.1684	23.9463	15.2022	17.3929	13.2892	8.48059	19.3433	6.67763	25.0639	1.8405	2.26527e-06	9.57158e-06	4.5431	15.8405
ATP2B4	13472.6	12114.3	12329.6	15005.8	14733.4	8893.49	8504.07	8297.85	14595.1	8995.61	13046.5	13485.5	16013.9	10081.7	-0.255811	0.169379	0.241935	13531.1	11323.8
ATP2C1	2976.46	3074.51	3026.31	3225.5	3239.42	2618.13	2428.99	2498.22	2714.54	2580.53	2037.04	2810.16	3272.04	2472.31	-0.256992	0.00127058	0.00318156	3108.44	2603.55
ATP2C2	48.7841	28.8221	54.434	52.8398	40.343	148.444	269.656	171.024	192.564	128.06	571.592	213.851	104.934	113.289	2.11085	4.68181e-10	3.53847e-09	45.0446	212.602
ATP5A1	7524.15	9224.44	8123.31	9327.74	7742.71	5918.62	6717.46	6483.72	5851.47	8413.3	3850.19	5000.25	8383.29	5737.64	-0.443767	6.25162e-05	0.000201934	8388.47	6261.77
ATP5B	8871.1	9668.48	10412.8	11393	10088.3	11730.7	10065.8	12617.8	10417.1	11990.5	8706.17	9495.43	12310.7	9260.62	0.0802366	0.395941	0.489283	10086.7	10732.8
ATP5C1	2930.21	3251.5	3228.65	3276.07	3004.29	2807.27	2579.96	2958.09	2379.1	3028.74	2282.98	2028.9	3194.77	2561.53	-0.257747	0.00420498	0.00940097	3138.15	2646.81
ATP5D	5.70204	6.75519	10.4469	3.77427	7.56431	16.7598	44.7692	19.0027	18.6353	19.3298	20.3534	6.44778	10.4934	8.02046	1.34874	0.00861606	0.0178185	6.84855	18.2013
ATP5E	0	1.35104	1.64952	0	0.63036	3.59139	4.16458	1.26685	3.72705	1.20811	0	1.07463	0.953947	0	1.34062	0.216457	0.296985	0.726183	1.77628
ATP5F1	4716.22	4846.17	5159.68	5999.59	5205.51	4370.73	4375.93	4653.13	3763.08	4807.08	5508.99	3702.1	4867.99	2945.51	-0.273798	0.01852	0.0352632	5185.43	4332.73
ATP5G1	696.916	843.948	847.301	945.833	847.834	703.913	680.908	713.235	515.576	924.206	366.362	418.031	818.486	753.923	-0.379616	0.015847	0.0308194	836.366	654.96
ATP5G2	5484.73	6175.59	6026.23	6729.53	5939.88	4808.87	4607.06	6237.95	4492.34	5286.7	3765.38	4277.03	6783.52	4683.95	-0.301321	0.00265921	0.00621158	6071.19	4993.65
ATP5G3	1137.87	1859.48	1577.49	1681.06	1417.68	1333.6	1359.73	1516.42	1354.16	1815.79	1041.42	821.017	1711.38	1652.21	-0.149152	0.218647	0.299623	1534.72	1400.64
ATP5H	2022.32	1886.5	2160.87	2610.29	2192.39	2272.15	2472.72	2939.09	2502.09	2411.39	2106.58	1433.56	3445.66	2506.39	0.140448	0.244264	0.328819	2174.47	2454.4
ATP5I	573.371	727.309	815.411	584.258	759.583	616.522	829.792	914.664	767.773	798.562	881.981	504.001	533.256	660.685	0.0274195	0.873421	0.906101	691.986	723.026
ATP5J	1094.79	1019.13	1179.95	1329.3	1227.94	1614.93	1685.61	2191.65	1580.27	1710.69	1577.39	889.794	1774.34	1523.89	0.434436	0.000357355	0.00100004	1170.22	1616.51
ATP5J2	136.215	140.058	151.755	165.313	166.415	132.882	186.365	244.501	124.235	172.76	132.297	79.5226	142.138	105.269	-0.106125	0.478403	0.570282	151.951	146.663
ATP5L	5653.89	5574.38	5901.42	6788.41	6056.49	5797.71	6103.19	7299.57	5160.73	5628.6	6033.09	3935.29	5940.23	4908.52	-0.107654	0.225334	0.307267	5994.92	5645.21
ATP5L2	1.90068	2.25173	1.64952	3.01942	2.52144	0	4.16458	5.06739	2.4847	0	5.08835	4.29852	1.90789	3.00767	0.317959	0.606732	0.686096	2.26856	2.89101
ATP5O	3319.22	3443.34	3476.63	3664.82	3281.65	2571.44	2673.66	3545.9	2293.38	2991.29	2189.69	1696.84	2961.05	2518.42	-0.427028	3.57112e-06	1.45988e-05	3437.13	2604.63
ATP5S	416.882	526.004	458.016	372.898	464.575	234.638	256.122	257.17	196.291	242.831	249.329	353.553	358.684	255.652	-0.739751	1.3847e-09	9.71539e-09	447.675	267.141
ATP5SL	224.28	248.141	281.517	258.915	298.16	260.975	332.125	362.318	376.432	315.317	239.153	235.344	330.066	240.614	0.167839	0.202106	0.280354	262.203	299.149
ATP6AP1	2911.84	2067.09	2432.49	3258.71	2991.06	6347.19	5773.15	6193.62	6548.43	4849.36	9579.68	4291	4510.26	3774.63	1.03374	1.0995e-18	2.98326e-17	2732.24	5763.03
ATP6AP1L	228.081	102.229	138.009	130.59	113.465	140.064	155.131	95.0135	70.814	136.517	74.6292	67.7017	82.9934	201.514	-0.332302	0.259056	0.345457	142.475	113.82
ATP6AP2	7811.16	7231.65	8145.86	9945.21	8893.74	8458.93	7039.18	8837.53	6749.69	7585.74	9905.33	5596.67	8204.9	5950.18	-0.165936	0.227296	0.309398	8405.53	7592.02
ATP6V0A1	2667.29	1176.3	1752.34	2298.53	2170.33	5020.77	3272.32	4897.63	5251.42	4114.83	4574.43	2981.02	4039.97	3548.05	1.04738	7.70634e-13	8.83943e-12	2012.96	4188.94
ATP6V0A2	2333.4	2167.51	1929.38	1836.56	2029.13	1539.51	1507.58	1298.52	1499.52	1187.57	1273.78	2137.44	1772.43	1268.23	-0.457608	1.58975e-05	5.75345e-05	2059.2	1498.29
ATP6V0B	6163.27	2905.63	4770.4	6641.21	6151.05	16206.8	16242.9	19881.9	16577.9	15250	28903.6	12743	6044.21	9908.27	1.48977	1.11427e-36	3.52722e-34	5326.31	15750.9
ATP6V0C	236.951	198.603	256.775	318.549	277.989	890.665	1014.07	1107.22	983.942	970.114	1640.15	620.061	475.066	530.353	1.73265	1.18358e-27	1.00356e-25	257.773	914.627
ATP6V0D1	3265.37	1771.66	2648.57	3608.21	3609.44	5304.49	5944.93	6776.36	8521.29	5140.52	9457.56	4080.37	3988.45	4850.37	0.972543	9.86393e-11	8.30433e-10	2980.65	6007.15
ATP6V0E1	4512.21	3284.82	4230.46	5009.22	5025.23	9544.72	9923.15	11775.3	13675.8	10341.4	14930.9	6495.06	10055.6	6953.74	1.19053	6.01276e-38	2.33062e-35	4412.39	10410.6
ATP6V0E2	236.951	326.05	259.524	224.947	248.992	94.5733	267.574	69.6766	62.1175	80.9435	132.297	121.433	164.079	110.281	-1.07685	0.00166903	0.0040735	259.293	122.553
ATP6V0E2-AS1	46.8834	58.0946	39.0385	27.9296	23.9537	28.7311	20.8229	8.86793	17.3929	13.2892	5.08835	27.9404	22.8947	33.0844	-1.0099	6.94947e-05	0.000222958	39.18	19.7902
ATP6V1A	8269.85	4308.91	6643.7	8933.71	7571.25	12126.9	9312	9597.63	10038.2	9480.06	14023.5	9104.26	11822.3	5525.09	0.500034	0.00547845	0.0119026	7145.48	10114.4
ATP6V1B1	2.53424	1.80138	3.29903	0	8.82503	9.57705	0	3.80054	4.9694	4.83245	0	1.07463	0.953947	1.00256	-0.189912	0.831275	0.872963	3.29194	2.91229
ATP6V1B1-AS1	3.1678	1.80138	0	0	2.52144	0	3.12343	3.80054	2.4847	1.20811	1.69612	3.22389	0	4.01023	0.535835	0.601321	0.681113	1.49812	2.17189
ATP6V1B2	13205.3	7742.35	11848.5	16492.8	14910.5	32301	17766.1	19419.5	23633.2	18002.1	22090.2	11002.1	23163.7	12925	0.62455	0.00124661	0.00312695	12839.9	20033.7
ATP6V1C1	4710.52	2903.83	2974.63	3541.78	3149.28	6193.96	3776.23	5757.82	8685.28	7381.57	8857.13	3750.46	7222.33	4943.61	0.816467	6.12185e-06	2.40034e-05	3456.01	6285.38
ATP6V1C2	53.219	82.4133	73.1285	70.2015	63.036	29.9283	42.6869	44.3396	43.4823	39.8677	47.4913	40.8359	36.25	58.1483	-0.68471	0.00195629	0.00470112	68.3997	42.5589
ATP6V1D	1163.85	866.466	1212.94	1544.43	1377.34	1243.82	1260.83	1612.7	1446.1	1504.1	2003.12	1124.06	1383.22	1371.5	0.210687	0.072066	0.11642	1233.01	1438.83
ATP6V1E1	3167.8	2330.99	2919.09	3491.96	3436.09	5967.7	5314	6890.38	6210.51	5455.84	6379.1	4479.06	6338.02	4636.83	0.889662	6.03494e-17	1.28069e-15	3069.19	5741.27
ATP6V1E2	131.78	150.866	132.511	118.512	100.227	94.5733	129.102	79.8114	67.087	140.141	115.336	132.179	132.599	74.1892	-0.230913	0.292535	0.381803	126.779	107.224
ATP6V1F	880.648	843.498	979.262	1117.19	1088.63	906.228	1129.64	1691.24	1352.92	1164.62	1234.77	560.957	1118.98	1342.42	0.200838	0.101667	0.156341	981.845	1166.87
ATP6V1G1	4720.02	4293.15	4759.4	4350.23	4391.08	5112.95	5338.99	6626.88	6309.9	5116.36	5408.92	3676.31	3840.59	5966.22	0.202679	0.0681428	0.110836	4502.78	5266.35
ATP6V1G2	36.7465	22.0669	32.9903	32.4588	25.2144	37.1111	49.9749	67.1429	40.9976	25.3704	37.3146	41.9106	20.9868	66.1688	0.537044	0.0631536	0.10368	29.8954	42.9975
ATP6V1H	508.115	485.923	512.999	508.017	550.934	616.522	712.143	782.911	895.735	769.568	725.939	545.912	876.677	650.66	0.490211	6.98889e-07	3.20164e-06	513.198	730.674
ATP7A	2498.76	1798.23	1948.08	2103.03	2335.48	2408.63	1327.46	1830.59	2064.79	2125.07	2647.64	2369.56	2231.28	1691.31	-0.0415678	0.770865	0.82429	2136.72	2077.37
ATP7B	57.6539	46.3856	81.9259	126.061	105.27	225.061	122.855	108.949	245.985	206.587	393.499	61.2539	189.835	144.368	1.12591	8.5009e-05	0.000268291	83.4593	188.71
ATP8A1	5581.66	5915.74	6208.78	6027.52	7792.5	4195.94	4089.62	3284.93	4469.98	3009.41	2455.98	5715.96	3699.41	3547.05	-0.72688	6.68899e-07	3.07018e-06	6305.24	3829.81
ATP8A2	7.60272	23.8683	15.9453	21.8908	19.5411	11.9713	10.4114	2.53369	1.24235	6.04056	5.08835	8.59704	13.3553	10.0256	-1.30597	0.000589624	0.001586	17.7697	7.69618
ATP8B1	214.777	205.808	138.559	163.804	136.158	135.276	128.061	103.881	142.87	112.354	83.1098	142.926	199.375	200.511	-0.320963	0.0409957	0.0713424	171.821	138.707
ATP8B2	5792.64	5975.64	4833.63	4529.13	4527.87	2509.19	3232.75	1109.76	911.886	2523.75	1351.81	2784.37	3236.74	3825.76	-1.19061	2.94303e-09	1.96922e-08	5131.78	2387.33
ATP8B3	50.0512	55.3925	64.3311	60.3884	75.0128	94.5733	70.7978	153.288	236.047	80.9435	91.5904	153.672	134.507	88.225	0.987838	0.000631674	0.00168835	61.0352	122.627
ATP8B4	1043.47	1089.39	1420.23	1986.78	1180.03	1357.55	2121.85	1506.28	2454.89	1218.99	1662.2	801.674	1647.47	1435.66	0.203306	0.453274	0.545968	1343.98	1578.51
ATP8B5P	3.1678	0	0.549839	0.754855	0.63036	2.39426	0	2.53369	4.9694	2.41623	0	1.07463	4.76973	4.01023	1.30316	0.162738	0.234105	1.02057	2.46313
ATP9A	459.331	638.591	556.986	563.122	639.815	385.476	579.917	489.003	518.06	503.783	2282.98	68.7763	583.816	759.938	0.0483988	0.916716	0.939616	571.569	685.749
ATP9B	644.964	590.854	743.382	746.552	501.136	433.361	381.059	525.742	499.425	469.956	515.62	565.255	412.105	581.483	-0.412768	0.00275467	0.00640698	645.377	487.112
ATPAF1	710.22	765.138	717.539	739.758	715.458	590.186	754.83	553.612	544.15	647.548	578.376	661.972	636.283	562.435	-0.244557	0.00565865	0.0122506	729.623	614.377
ATPAF2	320.581	360.277	373.89	444.61	360.566	306.466	217.599	309.111	275.802	266.993	167.916	270.807	278.553	299.765	-0.484736	0.000625824	0.00167389	371.985	265.89
ATPIF1	542.327	551.223	754.378	633.323	789.21	962.493	914.125	554.879	701.928	704.33	1043.11	766.211	602.894	607.55	0.208448	0.17712	0.250972	654.092	761.947
ATR	2768.66	3201.96	3115.39	3133.4	2986.64	1637.68	1574.21	1434.07	1513.18	1618.87	1124.53	2156.78	2094.87	2438.22	-0.822629	2.35301e-17	5.30768e-16	3041.21	1732.49
ATRAID	1102.39	1099.29	1005.1	1173.04	929.78	919.397	1051.56	1118.63	915.613	1038.98	827.706	789.853	1097.04	941.401	-0.144862	0.115238	0.174149	1061.92	966.685
ATRIP	235.051	234.18	216.636	249.102	186.586	380.688	336.29	307.844	490.729	306.861	374.842	304.12	299.539	270.69	0.594718	2.94542e-05	0.000101052	224.311	341.289
ATRN	1606.71	2242.72	2087.74	2275.13	1962.94	994.816	902.672	943.801	916.855	1042.6	734.419	1055.29	1678.95	1046.67	-0.990961	1.2283e-24	7.09089e-23	2035.05	1035.12
ATRNL1	1.90068	7.65588	5.49839	0	2.52144	0	0	0	0	1.20811	0	0	0.953947	3.00767	-2.30337	0.0726826	0.117326	3.51528	0.574415
ATRX	8040.51	6283.23	8156.3	7964.47	7809.52	6446.55	5699.22	6059.33	7018.04	6607.17	7486.67	7546.05	8517.79	7670.57	-0.12692	0.258204	0.344484	7650.81	7005.71
ATXN1	4939.23	3343.37	4171.08	5788.98	5846.58	5989.25	4337.41	7017.07	7459.07	6007.94	7730.91	5305.45	4342.37	4225.78	0.247062	0.00487956	0.0107377	4817.85	5823.92
ATXN10	1248.11	1558.2	1589.58	1627.47	1383.01	1000.8	1045.31	1021.08	785.166	896.42	549.542	818.868	1200.07	984.511	-0.696014	4.88795e-12	4.9966e-11	1481.27	922.418
ATXN1L	9853.12	8766.43	10641.6	11198.3	11864	7392.28	7569.12	8693.1	9208.31	9262.6	13843.7	13225.5	4958.62	11502.3	-0.189025	0.0747718	0.119934	10464.7	9517.28
ATXN2	646.231	565.184	646.06	638.607	703.481	780.529	696.526	808.248	766.531	695.873	995.621	824.241	980.657	770.967	0.344046	0.00047024	0.00128767	639.913	813.244
ATXN2L	3829.23	3734.72	3853.82	4144.91	3818.09	3198.73	3480.55	5086.39	4547	3798.31	4822.06	4220.07	3039.27	5616.33	0.100823	0.426658	0.52029	3876.15	4200.97
ATXN3	3416.15	3687.43	2985.07	3424.78	3180.79	2968.88	3201.52	3743.53	3474.86	2711	3339.66	3463.53	2834.18	3119.96	-0.0607175	0.600369	0.680318	3338.85	3206.35
ATXN3L	0.63356	0	0	0	0.63036	0	0	0	1.24235	1.20811	1.69612	1.07463	4.76973	2.00511	2.54122	0.119378	0.179477	0.252784	1.3329
ATXN7	12801.1	8596.65	11236.5	12153.2	12112.4	10081	7832.53	16361.3	19072.6	15965.2	14089.7	13561.8	10518.2	15926.6	0.258463	0.112888	0.171129	11379.9	13712.1
ATXN7L1	1689.07	1554.14	1668.76	1451.59	1717.1	1664.01	1304.55	1973.75	1534.3	1942.65	1697.81	1430.33	2030.95	1475.76	0.0371201	0.721507	0.78342	1616.13	1672.68
ATXN7L2	176.13	131.051	177.598	137.384	170.827	92.1791	203.023	177.359	132.932	210.212	162.827	214.926	103.98	236.604	0.101169	0.647876	0.721708	158.598	170.449
ATXN7L3	3786.15	2767.38	3426.04	4052.82	4087.25	4648.46	4412.37	5159.87	6103.67	4306.92	9820.52	6013.63	4270.82	4834.33	0.566673	3.60617e-07	1.71444e-06	3623.93	5507.84
ATXN7L3B	7028.08	8200.8	8569.23	6679.71	7345.58	2661.22	4406.12	2391.81	3040.03	3347.68	2954.64	4952.97	4145.85	4621.79	-1.07339	1.74177e-29	1.76906e-27	7564.68	3613.57
AUH	609.484	543.568	530.594	580.483	538.327	584.2	457.062	515.607	393.825	509.824	659.79	798.45	496.052	379.969	-0.0828472	0.504145	0.593592	560.491	532.753
AUNIP	36.7465	46.3856	40.1382	25.6651	57.9931	23.9426	40.6046	31.6712	26.0894	68.8624	15.2651	21.4926	31.4802	41.1048	-0.319639	0.276778	0.364958	41.3857	33.3903
AUP1	4149.18	3768.49	3999.53	4373.63	4104.9	4831.62	5117.22	5487.98	4096.03	5268.58	4508.28	4945.45	3668.88	4484.44	0.203828	0.0443471	0.0764323	4079.15	4712.05
AURKA	51.3183	43.6836	50.0353	44.5364	62.4056	79.0106	80.1681	79.8114	94.4187	165.511	81.4137	55.8808	167.895	63.1611	0.863243	0.000864023	0.00224247	50.3958	96.3634
AURKAIP1	111.506	63.9491	104.469	92.0923	138.049	244.215	396.676	562.48	499.425	370.891	432.51	248.239	150.724	256.655	1.70885	1.31133e-12	1.45836e-11	102.013	351.313
AURKAPS1	134.948	112.586	167.151	117.003	159.481	112.53	183.241	159.623	212.442	212.628	215.407	220.299	124.013	155.396	0.342758	0.0260701	0.0477666	138.234	177.287
AURKB	25.3424	31.0739	41.2379	55.8593	42.8644	181.964	222.805	239.434	183.868	303.236	150.955	98.8659	137.368	144.368	2.20658	2.6308e-15	4.3112e-14	39.2756	184.763
AURKC	45.6163	26.1201	33.5402	18.8714	44.1252	69.4336	90.5796	48.1402	47.2093	79.7354	39.0107	95.6421	38.1579	64.1637	0.911916	0.000396859	0.00110134	33.6546	63.5636
AUTS2	700.717	1220.89	1220.64	784.294	1283.41	377.096	447.692	88.6793	149.082	253.704	620.779	939.226	302.401	273.698	-1.59164	7.93151e-07	3.59616e-06	1041.99	383.595
AVEN	187.534	213.014	225.434	172.862	197.303	125.699	140.554	92.4798	77.0258	151.014	91.5904	145.075	131.645	131.335	-0.71921	1.99634e-08	1.17316e-07	199.229	120.713
AVIL	969.98	272.009	514.649	823.547	484.116	1551.48	1731.42	1545.55	1652.33	1790.42	2116.76	1179.94	976.842	1116.85	1.30407	1.72975e-06	7.46493e-06	612.86	1517.96
AVL9	4263.86	3335.71	3047.76	3746.35	3465.72	6219.1	4690.36	5880.7	6703.73	6428.37	6295.99	5425.81	5402.2	4347.09	0.665792	9.84008e-10	7.07123e-09	3571.88	5710.37
AVPI1	23.4417	44.1339	90.1735	58.8787	66.1877	51.4766	22.9052	40.5391	34.7858	31.4109	30.5301	64.4778	20.0329	37.0946	-0.649086	0.0240475	0.044466	56.5631	37.0281
AVPR1A	41.1814	76.1085	46.7363	53.5947	57.9931	55.068	64.551	60.8087	23.6047	39.8677	27.1379	7.52241	128.783	39.0997	-0.310182	0.318666	0.409862	55.1228	49.6048
AVPR1B	2.53424	0.450346	0	0	0	7.18279	0	0	7.45411	4.83245	1.69612	3.22389	0.953947	5.01279	2.58937	0.0228127	0.0424869	0.596917	3.3729
AVPR2	35.4793	27.9214	44.5369	47.5559	37.1912	28.7311	24.9875	39.2723	50.9364	14.4974	47.4913	32.2389	20.0329	65.1662	-0.101037	0.776792	0.828575	38.537	35.9282
AWAT1	6.96916	4.95381	2.74919	7.54855	0.63036	2.39426	3.12343	1.26685	0	0	0	1.07463	7.63158	1.00256	-1.77258	0.051859	0.0875986	4.57021	1.83259
AXDND1	3.1678	4.50346	8.79742	1.50971	8.82503	3.59139	6.24687	2.53369	4.9694	8.45679	16.9612	7.52241	5.72368	7.0179	0.296502	0.530688	0.61848	5.36068	7.00259
AXIN1	767.874	704.341	756.028	606.149	787.319	532.723	882.89	776.577	954.126	700.705	888.766	900.54	639.144	759.938	0.104695	0.516265	0.605198	724.342	781.712
AXIN2	869.877	643.995	556.986	409.886	335.351	177.175	310.261	59.5418	36.0282	86.9841	96.6787	336.359	110.658	395.008	-1.87558	2.09196e-11	1.93064e-10	563.219	178.744
AXL	30.4109	22.5173	24.7427	30.1942	40.343	7.18279	11.4526	26.6038	24.847	28.9947	10.1767	15.0448	68.6842	89.2276	-0.151616	0.761007	0.816143	29.6416	31.3571
AZI2	1572.5	1680.24	1812.27	2320.42	1867.12	2675.59	2187.44	2934.02	4190.45	4074.96	3968.92	2423.29	4800.26	2456.27	0.808226	1.2536e-05	4.63404e-05	1850.51	3301.24
AZIN1	9562.95	6892.09	9436.33	10535.5	9531.67	9739.86	8415.57	8838.79	9497.77	9457.11	16165.7	10284.2	10313.1	9596.48	0.150435	0.279287	0.367658	9191.71	10256.5
AZIN1-AS1	10.137	13.5104	9.89709	8.3034	10.7161	7.18279	14.576	7.60108	19.8776	8.45679	22.0495	18.2687	15.2632	9.02302	0.331613	0.318229	0.409493	10.5128	13.5887
AZIN2	78.5614	85.1154	46.7363	54.3496	30.8876	22.7455	38.5223	24.0701	27.3317	22.9541	35.6185	27.9404	35.296	48.1227	-0.885743	0.00841337	0.0174525	59.13	31.4002
AZU1	8.86983	1.35104	3.29903	27.9296	8.19467	31.1254	142.637	96.2804	245.985	21.746	76.3253	20.418	10.4934	13.0332	2.87236	0.000982502	0.00251491	9.92884	73.116
B2M	549368	396074	510853	609881	596584	773066	760548	1.01213e+06	978341	751308	1.03599e+06	549879	558185	702543	0.537001	4.65405e-10	3.52029e-09	532552	791333
B3GALNT1	41.8149	34.6766	72.5787	43.0267	37.1912	58.6594	40.6046	25.3369	22.3623	62.8219	71.237	46.2091	93.4868	28.0716	0.11277	0.762091	0.817208	45.8576	49.8655
B3GALNT2	369.365	462.956	572.932	437.061	434.948	508.781	518.49	231.833	441.035	386.596	337.528	415.882	697.335	536.368	-0.0229903	0.881754	0.912901	455.452	452.65
B3GALT2	23.4417	66.6512	18.1447	16.6068	8.19467	1.19713	11.4526	11.4016	16.1506	4.83245	15.2651	10.7463	11.4474	18.046	-1.21344	0.012692	0.0252577	26.6078	11.171
B3GALT4	60.1882	59.896	69.8295	70.9564	61.1449	68.2365	119.732	177.359	180.141	105.106	122.121	61.2539	137.368	75.1918	0.740346	1.67221e-06	7.24293e-06	64.403	116.279
B3GALT6	99.4689	196.801	143.508	150.971	144.983	71.8279	120.773	120.35	75.7834	89.4003	72.9331	83.8211	126.875	73.1867	-0.669863	0.000157673	0.000473841	147.146	92.7723
B3GAT1	241.386	441.339	338.701	514.811	408.473	84.9963	282.15	21.5364	14.9082	115.979	186.573	412.658	136.414	61.156	-1.67944	0.000505939	0.00137748	388.942	146.263
B3GAT3	293.338	317.944	291.964	251.367	244.579	354.351	380.018	338.248	290.71	247.663	296.821	394.389	235.625	338.864	0.190166	0.175188	0.248737	279.839	319.632
B3GLCT	368.732	615.623	493.755	391.77	520.677	214.286	267.574	206.496	132.932	205.379	188.269	352.479	240.395	274.701	-1.04863	7.04978e-13	8.1694e-12	478.111	231.39
B3GNT2	2211.12	1275.83	1779.83	2234.37	1843.8	5794.11	2520.61	3259.6	2607.69	2889.81	3834.92	2619.95	3437.07	3125.97	0.85077	1.39171e-05	5.09302e-05	1868.99	3343.3
B3GNT3	10.7705	2.70208	3.29903	0.754855	8.19467	0	1.04114	6.33424	1.24235	2.41623	0	0	0	5.01279	-1.46575	0.132036	0.195766	5.14423	1.78297
B3GNT4	4.43492	2.25173	6.59806	1.50971	4.41252	5.98565	5.20572	7.60108	11.1812	6.04056	3.39224	10.7463	1.90789	13.0332	0.890527	0.0918981	0.143408	3.84139	7.23265
B3GNT5	7464.6	1834.26	6557.37	7651.21	5092.67	5212.31	5001.66	6341.84	10022	14757.1	10919.6	11865	3428.49	14474.9	0.672678	0.0356206	0.0630809	5720.02	9113.66
B3GNT7	102.637	496.732	967.166	323.833	405.321	8.37992	106.197	5.06739	34.7858	60.4056	66.1486	280.478	14.3092	37.0946	-3.11426	2.70943e-08	1.56177e-07	459.138	68.0963
B3GNT8	24.0753	11.2586	15.3955	24.1554	37.8216	93.3762	96.8264	130.485	320.527	114.771	262.898	63.4032	111.612	75.1918	2.52836	3.55627e-15	5.71924e-14	22.5413	141.01
B3GNT9	12.0376	7.20553	15.9453	32.4588	17.0197	44.2938	26.0286	39.2723	49.694	31.4109	40.7068	31.1643	26.7105	25.0639	1.06774	4.05224e-05	0.000135668	16.9334	34.9272
B3GNTL1	383.304	225.173	206.189	493.675	380.107	514.766	567.424	619.488	474.578	445.794	1051.59	507.225	435.954	511.304	0.746319	0.00135098	0.00336531	337.69	569.792
B4GALNT3	29.7773	101.778	15.9453	46.801	20.8019	37.1111	154.089	111.483	68.3293	95.4409	223.888	61.2539	23.8487	36.0921	0.825559	0.101478	0.15615	43.0207	90.1706
B4GALNT4	6.96916	5.40415	0	3.77427	3.1518	3.59139	7.28801	0	3.72705	0	3.39224	11.8209	5.72368	5.01279	0.0318331	0.968211	0.977475	3.85988	4.50623
B4GALT1	8071.55	6442.65	9949.33	9577.6	9225.31	12286.2	9594.15	9895.34	10174.9	11664.3	14315.2	12220.7	9350.59	9296.71	0.334404	0.000531826	0.00144032	8653.29	10977.6
B4GALT1-AS1	29.1437	22.0669	34.09	42.2719	33.4091	88.5877	74.9624	73.4771	22.3623	57.9894	101.767	42.9852	20.9868	20.0511	0.716564	0.0181166	0.0345643	32.1963	55.9077
B4GALT2	7.60272	22.5173	17.5948	18.1165	30.2573	45.491	31.2343	30.4043	22.3623	70.0705	25.4418	40.8359	29.5724	46.1176	0.981452	0.00569285	0.0123176	19.2177	37.9478
B4GALT3	1141.67	938.071	1098.03	1244.76	1284.04	1301.28	1566.92	1502.48	1135.51	1800.09	1658.8	1177.79	1036.94	1750.46	0.328311	0.068026	0.110656	1141.31	1436.7
B4GALT4	700.717	681.824	607.022	585.013	517.525	2104.56	1321.21	928.599	1661.02	1757.8	2228.7	2522.16	1822.04	731.867	1.44727	2.59972e-06	1.09023e-05	618.42	1675.33
B4GALT4-AS1	24.7088	13.5104	14.8456	14.3422	5.67324	46.6881	15.6172	5.06739	24.847	21.746	37.3146	47.2837	13.3553	8.02046	0.672322	0.131882	0.195583	14.6161	24.4377
B4GALT5	9342.47	3849.56	6536.48	12940.5	8764.52	14480.5	21426.8	20427.9	39030.9	19569	32395.9	15803.5	35293.2	17332.2	1.52744	3.77042e-11	3.36205e-10	8286.7	23973.3
B4GALT6	232.516	467.009	398.083	299.677	412.255	204.709	309.22	121.617	144.113	181.217	242.545	128.956	290.954	129.33	-0.88586	0.000802884	0.0020987	361.908	194.74
B4GALT7	97.5682	176.085	149.006	98.1311	123.55	80.2078	90.5796	84.8788	121.75	130.476	89.8943	107.463	90.625	134.343	-0.294056	0.137218	0.202374	128.868	103.358
B4GAT1	42.4485	49.0877	46.1864	43.0267	26.4751	19.1541	33.3166	16.469	14.9082	27.7866	16.9612	18.2687	31.4802	14.0358	-0.967409	1.02926e-05	3.87718e-05	41.4449	21.3756
B9D1	7.60272	9.00692	13.746	10.568	6.93395	26.3369	6.24687	8.86793	16.1506	28.9947	10.1767	13.9702	20.9868	12.0307	0.786772	0.116636	0.175962	9.5715	15.9735
B9D2	60.8217	39.1801	55.5337	59.6335	63.6663	71.8279	98.9087	195.094	94.4187	131.684	157.739	91.3435	62.9605	111.284	0.966589	1.04758e-06	4.66949e-06	55.7671	112.807
BAALC	22.1746	32.8753	33.5402	17.3617	13.8679	8.37992	10.4114	11.4016	8.69646	19.3298	22.0495	16.1194	6.67763	12.0307	-0.969402	0.0044692	0.00992906	23.9639	12.7885
BAALC-AS1	0.63356	1.35104	1.09968	0	4.41252	0	0	0	2.4847	0	3.39224	1.07463	0	2.00511	-0.966143	0.451374	0.544072	1.49936	0.995187
BAAT	6.96916	2.70208	3.84887	2.26456	1.89108	1.19713	3.12343	1.26685	0	4.83245	3.39224	4.29852	1.90789	2.00511	-0.574451	0.359776	0.452142	3.53515	2.44707
BABAM1	1031.44	1232.15	1052.94	966.969	1110.06	837.992	1219.18	1189.57	1079.6	994.277	819.225	1067.11	887.171	1021.61	-0.0872813	0.49629	0.586621	1078.71	1012.86
BACE1	580.974	832.69	648.809	580.483	564.172	569.834	432.075	421.86	352.828	402.301	201.838	401.912	606.71	380.972	-0.621604	4.14649e-05	0.000138506	641.426	418.926
BACE1-AS	32.3115	49.9884	36.8392	43.0267	31.518	39.5053	23.9463	13.9353	14.9082	20.5379	20.3534	25.7911	47.6973	11.0281	-0.693629	0.0216626	0.0405997	38.7368	24.1892
BACE2	332.619	253.545	340.35	206.83	230.712	107.742	72.8801	13.9353	268.348	76.1111	23.7457	311.643	89.671	46.1176	-1.31096	0.00797723	0.0166679	272.811	112.244
BACH1	18404.9	10699.3	17154.4	23198.2	17813.3	17403.9	15562	29284.4	31242.6	22257.1	17648.1	9597.52	21362.7	24613.8	0.218616	0.208545	0.28794	17454	20996.9
BACH1-IT2	107.705	29.7228	63.2314	111.719	112.204	108.939	70.7978	144.421	161.506	137.725	213.711	144	112.566	184.471	0.7984	0.000972541	0.00249244	84.9164	142.015
BACH2	4317.08	3029.48	3109.34	1644.83	1640.2	1204.31	1338.91	254.636	1462.25	357.601	471.521	2791.89	905.296	3014.69	-1.18602	0.000588924	0.00158456	2748.18	1311.23
BAD	17.7397	18.4642	25.8424	15.0971	30.8876	40.7025	80.1681	81.0782	84.4799	51.9488	72.9331	38.6867	35.296	64.1637	1.44495	5.34505e-08	2.9172e-07	21.6062	61.0508
BAG1	1457.19	1407.78	1700.65	1830.52	1722.14	1964.49	2156.21	3262.13	2135.6	2154.06	2347.43	1683.94	1282.1	2106.37	0.348135	0.00512875	0.0112263	1623.66	2121.37
BAG2	123.544	176.986	197.392	146.442	159.481	64.6451	112.444	65.876	63.3599	78.5273	49.1874	122.508	101.118	69.1765	-0.997771	2.55115e-09	1.72198e-08	160.769	80.7602
BAG3	297.139	301.281	298.562	240.799	239.537	220.272	197.817	179.892	149.082	118.395	78.0214	156.896	138.322	336.859	-0.656163	0.0167598	0.032318	275.464	175.062
BAG4	1540.18	1272.23	1350.4	1865.25	1568.96	1881.89	1212.93	1450.54	1587.72	1284.22	1156.75	1279.88	1219.14	1403.58	-0.128066	0.342281	0.43454	1519.41	1386.3
BAG5	4101.03	4479.14	4398.16	4397.78	4442.77	2458.91	3194.23	2916.28	2400.22	3072.23	2818.95	3490.4	2665.33	3141.01	-0.585557	6.12992e-09	3.90166e-08	4363.78	2906.4
BAG6	4211.27	3657.71	4194.72	4763.13	4502.03	5254.21	5463.93	7270.44	6335.99	5575.44	7457.83	5680.49	4706.77	5555.17	0.452368	1.52913e-08	9.14731e-08	4265.77	5922.25
BAHCC1	31.678	46.3856	59.3826	57.369	36.5609	58.6594	63.5098	81.0782	85.7222	60.4056	45.7952	29.015	98.2565	49.1253	0.356913	0.0519057	0.0876618	46.2752	63.5075
BAHD1	1263.95	1460.47	1416.38	1169.27	1435.96	784.121	1047.39	838.653	798.832	750.238	805.656	1002.63	1072.24	990.527	-0.580814	1.33662e-05	4.90464e-05	1349.21	898.92
BAIAP2	129.88	109.884	116.016	122.286	117.877	220.272	240.504	145.687	207.473	189.674	435.902	214.926	98.2565	181.463	0.775338	0.00603454	0.0129771	119.189	214.906
BAIAP2-AS1	452.995	530.958	559.736	517.076	606.406	474.064	425.828	228.032	218.654	314.109	220.495	410.509	600.987	147.376	-0.696618	0.0086104	0.0178087	533.434	337.784
BAIAP2L1	195.77	169.33	160.553	163.049	189.108	527.935	244.669	428.194	622.418	361.226	383.323	329.911	271.875	363.928	1.12876	7.89488e-07	3.58212e-06	175.562	392.609
BAIAP2L2	18.3732	20.2656	16.4952	6.79369	6.3036	41.8996	39.5635	34.2049	29.8164	28.9947	30.5301	50.5076	39.1118	20.0511	1.36001	3.64668e-06	1.48821e-05	13.6462	34.9644
BAIAP3	105.804	63.4988	100.071	43.0267	104.009	666.802	950.565	306.577	229.835	349.145	683.536	256.837	27.6645	123.315	2.20011	2.61402e-05	9.07808e-05	83.282	399.364
BAK1	1251.91	1085.33	1266.83	1698.42	1506.56	2727.06	1746	2399.41	3263.66	2603.48	1645.23	1784.96	1864.01	1281.27	0.638715	0.00233166	0.00550879	1361.81	2146.12
BAMBI	9.50339	9.90761	12.6463	7.54855	21.4322	35.9139	58.3041	63.3424	258.409	149.806	42.403	16.1194	109.704	59.1509	2.67858	2.11682e-07	1.05386e-06	12.2076	88.1281
BANF1	901.555	1121.81	1223.94	1201.73	1165.53	657.225	1009.91	1130.03	749.138	1028.1	656.398	372.897	1060.79	811.069	-0.49519	4.99696e-05	0.000164399	1122.91	830.617
BANK1	2601.4	2379.63	2660.12	1185.88	1446.68	2071.04	979.717	326.847	2613.91	805.811	373.146	3175.53	859.506	1403.58	-0.520251	0.283285	0.371911	2054.74	1401.01
BANP	669.039	391.801	565.234	621.246	590.017	847.569	758.994	723.37	781.439	653.589	1187.28	803.823	541.842	793.023	0.457566	2.27435e-05	7.98756e-05	567.467	787.881
BAP1	2537.41	2311.63	3020.26	3156.05	3219.88	2349.97	3161.96	3906.96	3869.92	3363.39	5690.48	4039.53	2162.6	4287.94	0.314483	0.04451	0.0766922	2849.04	3648.08
BARD1	434.622	525.103	557.536	514.056	484.116	389.068	409.17	312.911	437.308	497.742	266.291	529.793	367.27	537.371	-0.271197	0.12573	0.187676	503.087	416.325
BARX2	0	2.70208	1.09968	0	3.1518	0	4.16458	0	1.24235	0	0	1.07463	0.953947	0	-0.710625	0.571776	0.65594	1.39071	0.826167
BASP1	12791.6	2457.99	5886.02	12428.7	10540.2	17952.2	16543.8	28848.6	25983.8	16623.6	41032.5	16466.6	15238.3	15727.1	1.32828	1.86119e-09	1.27939e-08	8820.9	21601.8
BATF	105.804	134.653	96.7716	110.209	111.574	274.143	224.887	776.577	757.834	409.55	407.068	156.896	217.5	898.291	1.94961	2.22513e-09	1.51152e-08	111.802	458.083
BATF2	39.9143	20.2656	113.267	48.3107	134.897	239.426	520.572	2185.31	3287.26	1145.29	278.163	270.807	1325.99	1643.19	3.93038	3.48815e-08	1.97115e-07	71.3308	1210.67
BATF3	12.0376	37.3787	23.6431	9.05826	33.4091	10.7742	22.9052	36.7386	16.1506	15.7055	45.7952	9.67167	9.53947	63.1611	0.101744	0.829445	0.871426	23.1053	25.6046
BAX	661.436	716.5	740.633	691.447	884.394	1070.24	1304.55	1678.57	1226.2	1030.52	1273.78	962.868	967.302	1098.8	0.651618	2.37576e-06	1.00117e-05	738.882	1179.2
BAZ1A	12106.1	6385.45	9073.99	11728.2	9892.86	14795.3	17345.5	20667.3	30369.3	18374.2	22526.1	15300.6	20065.3	22885.4	1.03507	5.50226e-12	5.60045e-11	9837.31	20258.8
BAZ1B	3865.35	4007.63	3917.6	3863.35	3571.62	2683.97	2750.7	2515.96	2755.53	2985.25	1877.6	2811.23	4260.33	3189.13	-0.439056	1.61288e-07	8.16673e-07	3845.11	2869.97
BAZ2A	18863.6	14132.3	17859.9	20729.1	20305.1	23553.6	18347	28531.9	34875.3	24035.4	29939.9	30692.5	20265.6	30478.7	0.533394	7.56113e-06	2.9165e-05	18378	26746.7
BAZ2B	9289.88	4072.93	6698.68	9765.56	10100.9	12973.3	11383.9	12487.3	17077.4	12133.1	15141.2	7921.1	9831.38	10643.1	0.610743	0.0014297	0.00354842	7985.59	12176.9
BBC3	31.0444	16.6628	12.6463	24.9102	24.584	122.107	104.114	186.227	57.1481	48.3245	108.552	17.1941	34.3421	50.1279	1.76225	4.47197e-06	1.79911e-05	21.9695	80.9041
BBIP1	1232.27	730.011	944.623	993.389	978.318	1415.01	1238.96	1771.05	1552.94	1250.4	2014.99	1520.6	1234.41	1325.38	0.58904	1.72107e-09	1.19126e-08	975.723	1480.42
BBS1	354.793	375.588	332.652	253.631	329.048	293.297	290.479	315.445	359.039	236.79	220.495	276.18	317.664	293.749	-0.189908	0.126008	0.188062	329.143	289.238
BBS10	623.423	594.907	515.199	471.784	406.582	743.418	451.857	540.944	657.204	669.294	459.648	421.255	802.269	363.928	0.101373	0.5466	0.633101	522.379	567.757
BBS12	89.9655	77.4595	64.8809	72.4661	69.9699	34.7168	27.0698	24.0701	42.2399	32.619	32.2262	36.5374	132.599	76.1944	-0.760864	0.00407703	0.00914012	74.9484	48.6969
BBS2	1801.84	2338.2	2010.21	1444.79	1830.56	1285.72	1285.81	1074.29	949.156	662.046	1083.82	1548.54	1525.36	807.059	-0.718134	1.18388e-05	4.40027e-05	1885.12	1135.76
BBS4	948.439	899.791	844.552	791.088	892.589	1239.03	712.143	1251.64	1042.33	1013.61	1046.5	1220.78	823.256	904.307	0.216724	0.103595	0.158906	875.292	1028.18
BBS5	70.3251	104.931	45.6366	63.4078	75.6431	29.9283	38.5223	13.9353	24.847	14.4974	32.2262	35.4628	25.7566	47.1202	-1.32017	2.12044e-07	1.05511e-06	71.9887	29.144
BBS7	487.207	447.193	418.427	465.745	433.057	369.913	350.866	267.305	331.708	309.277	254.418	270.807	465.526	295.754	-0.489567	2.42575e-05	8.48006e-05	450.326	323.953
BBS9	677.909	605.265	643.861	664.272	639.185	532.723	364.401	401.591	413.703	316.526	271.379	444.897	410.197	450.148	-0.688012	1.22342e-08	7.42617e-08	646.098	400.618
BBX	5453.05	5473.5	6006.44	5679.53	6029.39	3994.83	3346.24	4141.32	4595.46	4233.23	3405.81	5640.73	4095.29	7166.28	-0.343451	0.0177147	0.0339033	5728.38	4513.24
BCAP29	1430.58	1550.99	1640.17	1687.1	1630.74	1015.17	1045.31	1241.51	1114.39	1002.73	888.766	940.301	1139.97	747.908	-0.656704	4.96276e-09	3.19409e-08	1587.92	1015.12
BCAP31	3872.32	3317.7	3666.32	4858.25	4389.19	4527.55	4431.11	5112.99	4471.22	3737.9	8187.16	4351.18	4043.78	3180.11	0.179364	0.169368	0.241935	4020.76	4671.45
BCAR3	44.3492	25.2194	25.8424	42.2719	27.1055	26.3369	18.7406	10.1348	22.3623	33.8272	16.9612	11.8209	21.9408	33.0844	-0.594073	0.0423065	0.0733212	32.9577	21.6899
BCAR4	0	3.15242	1.09968	0	0.63036	0	0	1.26685	0	2.41623	1.69612	1.07463	0	3.00767	0.112147	0.919133	0.94159	0.976492	1.05128
BCAS1	56.3868	21.1663	57.733	29.4393	53.5806	29.9283	34.3578	36.7386	27.3317	72.4868	61.0603	49.433	62.0066	44.1125	0.0825228	0.798076	0.846385	43.6612	46.3839
BCAS2	1284.23	1090.29	1623.67	1274.95	1412.64	1149.25	1452.4	1341.59	1393.92	1454.57	1596.05	1449.68	1087.5	1806.61	0.080241	0.468005	0.560497	1337.15	1414.62
BCAS3	1269.65	814.225	948.471	1241.74	1226.68	1349.17	1209.81	1402.4	1427.46	1250.4	1736.83	1177.79	932.006	1059.7	0.2043	0.0257618	0.0472611	1100.15	1282.84
BCAS4	142.551	134.653	129.762	113.228	88.2503	37.1111	97.8676	5.06739	33.5435	20.5379	28.834	165.493	69.6381	72.1841	-1.36875	6.49067e-07	2.98564e-06	121.689	58.9196
BCAT1	769.141	1208.28	608.671	1619.16	740.672	2062.66	638.222	951.402	1685.87	819.1	4735.56	2659.71	1910.76	113.289	0.681901	0.169102	0.241648	989.185	1730.73
BCAT2	134.948	163.476	115.466	103.415	112.834	92.1791	104.114	87.4124	86.9646	100.273	54.2758	105.314	109.704	153.391	-0.339221	0.0171984	0.0330516	126.028	99.2921
BCCIP	1179.69	1340.23	1502.16	1255.32	1318.08	778.135	901.631	974.205	747.895	1075.22	600.426	846.808	1031.22	1248.18	-0.536114	3.46956e-06	1.42173e-05	1319.1	911.525
BCDIN3D	119.743	135.554	103.37	116.248	79.4253	112.53	77.0447	130.485	130.447	93.0247	78.0214	80.5972	131.645	123.315	-0.060353	0.735064	0.794597	110.868	106.346
BCDIN3D-AS1	24.7088	36.478	32.4405	31.7039	29.6269	17.957	23.9463	13.9353	12.4235	14.4974	13.5689	47.2837	38.1579	42.1074	-0.381217	0.101095	0.155688	30.9916	24.8753
BCKDHA	240.119	309.388	342.549	276.277	330.308	584.2	397.717	805.715	771.5	591.975	792.087	334.21	538.98	387.99	0.844217	0.000192861	0.00056782	299.728	578.264
BCKDHB	305.376	334.607	334.302	301.187	315.81	175.978	208.229	64.6092	74.5411	131.684	115.336	186.986	140.23	213.545	-1.17535	8.89661e-13	1.01e-11	318.256	145.682
BCKDK	537.259	406.662	534.443	628.039	713.567	826.02	940.153	1208.57	975.245	1198.45	1353.5	707.106	982.565	601.534	0.761045	2.83458e-05	9.76903e-05	563.994	977.016
BCL10	1899.41	1182.61	1994.81	2021.5	1774.46	1589.79	1714.76	2813.67	2753.05	2898.26	3288.77	1798.93	1529.18	3212.19	0.408773	0.0171268	0.0329374	1774.56	2399.85
BCL11A	706.419	726.858	779.671	599.355	477.182	644.056	369.606	305.31	521.787	283.906	103.463	1155.23	292.862	590.506	-0.538608	0.0813453	0.12904	657.897	474.081
BCL11B	11983.8	12076	9366.5	8991.08	7271.83	3410.63	5398.33	1368.19	826.163	1296.3	2113.36	3755.83	2535.59	6016.35	-1.85434	4.00331e-10	3.06469e-09	9937.84	2968.97
BCL2	6203.82	6725.02	6526.03	5099.05	4866.38	2122.51	2499.79	901.995	1247.32	1035.35	1058.38	5364.55	2104.41	3190.14	-1.60943	1.4703e-32	2.49334e-30	5884.06	2169.38
BCL2A1	17889.2	4466.08	12139.9	17318.6	17977.2	39789	29541.4	46492	63899.1	48341.4	80389.2	31096.6	26763	49328.8	1.73463	5.71867e-15	8.89555e-14	13958.2	46182.3
BCL2L1	693.748	780.9	703.793	776.746	1001.01	933.762	1127.56	1641.83	877.1	1036.56	1294.14	529.793	856.644	976.491	0.330977	0.0743183	0.119336	791.24	1030.43
BCL2L10	3.80136	0.900692	5.49839	0.754855	3.1518	7.18279	4.16458	6.33424	7.45411	1.20811	3.39224	2.14926	1.90789	12.0307	0.897224	0.194029	0.270632	2.82142	5.09154
BCL2L11	3429.46	2468.8	3136.28	3389.3	2806.99	4775.36	3418.08	5463.91	6665.21	4407.19	3387.15	5123.84	3015.43	3374.61	0.52207	0.00470276	0.010386	3046.16	4403.42
BCL2L12	1272.19	1171.35	1034.25	1225.13	1028.12	1027.14	974.511	929.866	995.123	838.43	834.49	1563.59	1172.4	1279.26	-0.107959	0.323127	0.414505	1146.21	1068.31
BCL2L13	1614.94	1442.46	1493.36	1734.66	1630.11	1945.34	1728.3	2210.65	1885.89	1485.98	1465.45	1188.54	2092.01	1604.09	0.106637	0.236777	0.320192	1583.11	1734.03
BCL2L14	16.4726	26.5704	20.8939	14.3422	19.5411	5.98565	13.5349	6.33424	14.9082	14.4974	0	8.59704	8.58552	27.069	-0.805347	0.100616	0.155064	19.564	11.0569
BCL2L15	123.544	158.071	126.463	313.265	148.134	216.681	434.157	200.162	391.341	119.603	205.23	199.881	167.895	103.263	0.379723	0.36088	0.453225	173.896	226.468
BCL2L2	904.09	1152.44	1164.01	1356.47	1211.55	984.042	967.223	1298.52	1027.42	1088.51	776.822	723.226	1343.16	884.255	-0.225958	0.0211782	0.0398018	1157.71	1010.35
BCL3	2043.23	899.791	1368	2319.67	2043.63	2395.46	2742.37	8604.43	7337.32	4689.89	10030.8	3306.64	1987.07	9345.84	1.63095	3.31433e-08	1.87628e-07	1734.86	5604.43
BCL6	22063.1	4865.09	11515.8	19948.6	16759.4	77601.6	67001.8	135936	173738	71572.2	122967	87723.1	51848.9	67421	2.6841	3.43696e-33	6.46319e-31	15030.4	95090
BCL6B	1.26712	2.70208	0	0	0	3.59139	1.04114	2.53369	4.9694	2.41623	1.69612	5.37315	4.76973	2.00511	1.99444	0.0183013	0.0348957	0.793839	3.15511
BCL7A	249.622	171.582	206.739	127.57	170.827	181.964	93.703	15.2022	229.835	76.1111	22.0495	4.29852	94.4407	179.458	-0.968811	0.0949458	0.147594	185.268	99.6735
BCL7B	781.179	725.057	936.925	946.588	952.473	671.59	1160.88	1706.44	1202.6	1206.9	1594.35	816.719	807.039	1312.35	0.377068	0.018914	0.0359377	868.444	1164.32
BCL7C	19.0068	16.6628	6.59806	10.568	24.584	17.957	12.4937	12.6685	14.9082	14.4974	11.8728	13.9702	21.9408	9.02302	-0.10821	0.745199	0.803085	15.4839	14.3702
BCL9	529.656	543.117	609.221	588.032	471.509	396.25	373.771	499.138	432.338	526.737	681.84	543.763	361.546	540.378	-0.209511	0.123658	0.184962	548.307	483.973
BCL9L	1630.78	2298.57	2100.93	1668.23	1962.31	638.071	1343.08	639.758	526.757	559.356	520.708	1354.03	881.447	1235.15	-1.21402	3.12127e-06	1.29099e-05	1932.16	855.373
BCLAF1	33726.3	24047.1	34413.8	35574.8	31616.9	16743.1	22710.5	25758.8	23258.1	25301.5	39896.1	27877	14572.5	34460.9	-0.348052	0.0190601	0.0361827	31875.8	25619.8
BCO2	74.1265	121.143	72.5787	110.209	71.2306	155.627	82.2504	84.8788	132.932	88.1922	101.767	98.8659	116.382	104.266	0.256075	0.182187	0.256793	89.8575	107.24
BCOR	1013.7	1183.96	914.931	1115.68	1003.53	996.013	846.45	918.464	1376.52	649.965	359.577	434.15	1190.53	1105.82	-0.311032	0.134027	0.198312	1046.36	875.277
BCORL1	491.642	273.36	298.012	484.617	392.714	627.297	673.62	890.593	1128.05	589.559	1314.49	654.45	743.125	559.427	1.0036	9.59689e-12	9.33779e-11	388.069	797.846
BCORP1	0	923.659	0.549839	671.821	0	0	0	92.4798	0	118.395	0	352.479	0	0	-2.73142	0.40835	0.502091	319.206	62.5948
BCR	1239.24	1239.8	1570.34	1338.36	1698.19	780.529	1866.77	937.467	1010.03	962.866	1724.95	1380.9	893.848	1246.18	-0.254413	0.280112	0.368534	1417.19	1200.39
BCRP3	0.63356	6.75519	10.9968	5.28398	1.89108	15.5627	7.28801	3.80054	4.9694	4.83245	10.1767	3.22389	7.63158	15.0384	0.681942	0.218118	0.29907	5.11212	8.05818
BCS1L	404.211	500.334	361.244	338.93	384.519	367.519	355.03	277.44	268.348	333.439	212.015	313.792	338.651	397.013	-0.314766	0.00357714	0.00812394	397.848	318.138
BDH1	368.098	345.866	339.25	317.794	243.319	180.767	269.656	146.954	171.444	120.811	105.159	225.672	148.816	184.471	-0.902915	7.14858e-07	3.2649e-06	322.865	172.639
BDH2	360.495	478.267	530.594	504.243	431.796	250.2	318.59	235.634	263.378	171.552	174.7	343.882	624.835	293.749	-0.686748	0.000118736	0.000365385	461.079	297.391
BDKRB2	1.90068	0	0	0.754855	0	10.7742	5.20572	1.26685	0	1.20811	0	1.07463	0	0	2.02214	0.264616	0.351704	0.531107	2.16994
BDNF	9.50339	7.20553	2.19935	1.50971	8.19467	7.18279	4.16458	7.60108	3.72705	9.6649	3.39224	5.37315	10.4934	6.01534	0.093809	0.851459	0.889144	5.72253	6.40162
BDNF-AS	29.7773	31.5242	26.9421	22.6456	17.6501	23.9426	18.7406	10.1348	16.1506	7.24868	18.6573	10.7463	21.9408	16.0409	-0.675549	0.0160291	0.0311161	25.7079	15.9558
BDP1	5827.48	5988.25	5841.48	5618.39	5344.82	3044.3	2628.89	2110.57	2500.85	2744.83	2216.83	4530.64	3967.47	3581.13	-0.933784	2.33782e-21	9.11749e-20	5724.08	3036.17
BEAN1	53.8526	33.7759	28.5916	190.223	57.9931	258.58	163.46	368.652	299.407	269.409	432.51	301.971	187.928	114.292	1.89663	4.4856e-08	2.48237e-07	72.8873	266.245
BEAN1-AS1	31.0444	12.6097	28.0418	86.8083	25.8447	197.527	100.991	195.094	144.113	160.679	240.849	153.672	107.796	72.1841	2.07939	1.44928e-11	1.37083e-10	36.8698	152.545
BECN1	2342.27	1946.4	1951.93	2365.72	2390.32	2294.9	2245.75	3449.62	3371.74	3052.9	2778.24	2496.37	2753.09	2405.13	0.310617	0.000214224	0.000625481	2199.33	2760.86
BEGAIN	8.86983	31.9746	19.2443	20.3811	11.3465	26.3369	29.152	38.0054	42.2399	22.9541	49.1874	21.4926	20.0329	11.0281	0.520137	0.14032	0.206196	18.3633	28.9366
BEND2	727.96	482.771	479.459	1106.62	1140.32	620.114	844.368	434.529	70.814	461.499	883.678	180.538	127.829	230.588	-0.916918	0.0332198	0.0592852	787.426	428.217
BEND3	46.8834	31.9746	80.8263	61.8981	49.7984	34.7168	39.5635	11.4016	11.1812	45.9083	20.3534	40.8359	50.5592	37.0946	-0.826457	0.00434787	0.00968443	54.2761	32.4016
BEND3P3	629.125	494.93	510.25	233.25	596.95	360.336	102.032	483.936	505.637	382.972	315.478	182.687	375.855	557.422	-0.503239	0.142703	0.209262	492.901	362.928
BEND4	225.547	224.272	274.369	151.726	145.613	245.412	88.4973	22.8032	300.649	74.903	33.9224	294.449	68.6842	175.448	-0.509746	0.305365	0.395782	204.306	144.974
BEND5	26.6095	45.4849	28.0418	23.4005	13.2375	44.2938	39.5635	5.06739	7.45411	30.2028	13.5689	27.9404	17.171	32.0818	-0.1879	0.568154	0.652889	27.3549	24.1493
BEND6	5.70204	11.2586	5.49839	5.28398	6.93395	0	0	0	1.24235	0	0	0	0	4.01023	-3.49666	0.000202179	0.000592773	6.9354	0.58362
BEND7	193.236	36.0277	112.167	36.233	166.415	743.418	499.749	461.132	746.653	341.896	1545.16	253.613	435.954	218.557	2.31341	2.25588e-08	1.31389e-07	108.816	582.904
BEST1	1747.99	545.369	610.321	1099.82	1135.91	4098.98	2733	3545.9	4496.07	4360.08	5663.34	3662.34	4432.99	1993.08	1.93338	2.6158e-18	6.65086e-17	1027.88	3887.31
BEST2	2.53424	3.60277	2.74919	5.28398	1.26072	3.59139	6.24687	5.06739	11.1812	4.83245	8.48059	2.14926	2.86184	2.00511	0.633862	0.34174	0.433956	3.08618	5.15734
BEST3	0.63356	2.25173	3.29903	3.01942	3.78216	8.37992	2.08229	5.06739	0	8.45679	10.1767	8.59704	4.76973	3.00767	1.04641	0.148872	0.216885	2.59718	5.61528
BEST4	17.1061	13.5104	12.6463	12.0777	5.67324	19.1541	23.9463	26.6038	23.6047	2.41623	28.834	13.9702	12.4013	14.0358	0.520471	0.158297	0.228586	12.2027	18.3296
BET1	387.738	407.113	350.247	381.957	337.242	270.552	215.517	263.504	113.054	369.682	162.827	133.254	607.664	218.557	-0.626934	0.00464256	0.0102626	372.859	261.624
BET1L	1955.17	1674.39	1839.21	1653.89	1993.2	2224.27	1968.8	1553.15	1552.94	1479.94	1479.02	2539.35	1490.07	1314.35	-0.0784825	0.652957	0.72626	1823.17	1733.54
BEX1	4.43492	16.6628	4.94855	37.7427	6.3036	10.7742	43.7281	83.6119	62.1175	7.24868	81.4137	3.22389	11.4474	5.01279	0.64523	0.363978	0.456517	14.0185	34.2865
BEX2	220.479	304.434	211.688	144.932	163.893	63.4479	174.912	51.9407	83.2375	45.9083	118.728	166.568	76.3158	218.557	-0.951316	0.00035887	0.00100383	209.085	111.068
BEX4	688.046	817.378	849.501	936.775	651.792	556.666	958.894	922.265	568.997	414.383	385.019	957.495	555.197	1029.63	-0.163561	0.484616	0.576025	788.698	705.393
BEX5	58.921	60.7967	94.0224	33.2136	47.9073	22.7455	32.2755	22.8032	11.1812	10.873	30.5301	9.67167	14.3092	52.133	-1.34355	0.00131358	0.00327953	58.9722	22.9469
BFAR	1334.28	1566.75	1713.3	1772.4	1792.11	1048.69	1033.86	1265.58	1010.03	1292.68	1148.27	1470.09	1606.45	1257.21	-0.403999	0.00166867	0.00407313	1635.77	1236.98
BFSP1	47.517	64.8498	69.8295	64.9175	105.27	43.0967	22.9052	15.2022	11.1812	10.873	42.403	47.2837	31.4802	14.0358	-1.44777	0.000835208	0.00217452	70.4768	26.4957
BFSP2	3.80136	7.20553	3.84887	5.28398	5.67324	16.7598	8.32916	1.26685	4.9694	6.04056	0	8.59704	5.72368	14.0358	0.412995	0.457172	0.549979	5.1626	7.30248
BGLAP	0	0	1.09968	0.754855	0.63036	5.98565	0	2.53369	4.9694	0	5.08835	5.37315	3.81579	3.00767	2.80824	0.00801921	0.0167427	0.496978	3.4193
BHLHB9	112.14	126.097	135.81	101.151	124.811	58.6594	119.732	36.7386	60.8752	42.2839	62.7564	88.1196	74.4079	76.1944	-0.813211	0.00033394	0.000939217	120.002	68.863
BHLHE40	4512.85	3681.58	4224.96	5512.71	5035.94	2861.14	4260.36	4644.26	1807.62	1562.09	2786.72	2142.81	1143.78	3561.08	-0.74976	0.00373354	0.00844179	4593.61	2752.21
BHLHE40-AS1	33.5787	37.3787	24.7427	17.3617	57.3627	5.98565	30.1932	13.9353	11.1812	6.04056	18.6573	23.6419	12.4013	20.0511	-1.13112	0.00151891	0.00374512	34.0849	15.7875
BHLHE41	42.4485	49.5381	70.3793	13.5874	5.04288	144.853	15.6172	20.2696	44.7246	136.517	15.2651	33.3135	71.546	42.1074	0.892165	0.195631	0.272665	36.1992	58.2459
BHMT	0.63356	0	3.84887	3.01942	1.26072	2.39426	1.04114	0	1.24235	1.20811	0	1.07463	0.953947	0	-0.951414	0.3654	0.457998	1.75251	0.879383
BHMT2	3.80136	2.70208	0	0	1.26072	7.18279	4.16458	5.06739	1.24235	1.20811	5.08835	1.07463	0.953947	2.00511	0.878476	0.340183	0.432325	1.55283	3.1097
BICC1	19.6403	23.8683	23.6431	18.8714	4.41252	1.19713	2.08229	3.80054	12.4235	2.41623	3.39224	0	1.90789	6.01534	-2.53634	0.00017026	0.000508051	18.0871	3.6928
BICD1	209.708	217.967	219.935	184.939	193.52	187.95	130.143	100.081	124.235	142.557	133.993	373.971	112.566	143.366	-0.416619	0.070644	0.114385	205.214	160.985
BICD2	3921.73	2749.81	2930.09	3485.17	3420.33	3924.2	4003.2	4705.07	3924.59	3447.95	4116.48	3221.74	3748.06	2172.54	0.142164	0.305292	0.395715	3301.43	3695.98
BID	1547.15	1063.27	1567.04	1785.99	1611.83	2044.7	2380.06	4090.65	2430.04	1651.49	2628.98	1131.59	1198.16	2392.1	0.4857	0.0136717	0.0269923	1515.06	2216.42
BIK	22.8081	11.2586	12.6463	21.8908	23.3233	37.1111	36.4401	62.0755	52.1787	51.9488	40.7068	26.8657	29.5724	64.1637	1.28566	2.76928e-06	1.15572e-05	18.3854	44.5625
BIN1	847.069	1203.77	885.24	769.197	956.255	330.408	704.855	260.97	264.621	298.404	315.478	669.494	427.368	667.703	-1.12954	7.93049e-07	3.59616e-06	932.307	437.7
BIN2	24030.3	16756	19903.1	23625.4	24091.1	34904.7	34481.7	40593.6	39163.9	33498.5	51723.1	36230.1	31592.8	25181.2	0.727475	3.76816e-14	5.18613e-13	21681.2	36374.4
BIN3	990.254	681.824	881.391	1015.28	1086.74	1116.92	1319.13	2510.89	2135.6	1585.04	2213.43	1487.29	1263.03	1746.45	0.840979	1.01004e-10	8.49215e-10	931.098	1708.64
BIN3-IT1	24.0753	10.358	17.045	27.9296	23.3233	28.7311	18.7406	43.0728	40.9976	30.2028	44.0991	35.4628	2.86184	55.1406	0.634646	0.0589635	0.0979099	20.5462	33.2566
BIRC2	4286.66	3271.76	4238.16	4390.99	4002.78	4865.14	4459.22	6202.48	7582.07	6836.71	5505.6	3307.71	5924.96	6806.36	0.475407	0.000940332	0.00241805	4038.07	5721.14
BIRC3	16037.3	16556.1	15981.6	12527.6	11060.3	6878.71	5131.8	4934.37	7312.48	4404.78	3655.13	5116.31	5474.7	12384.6	-1.2083	9.61331e-08	5.04241e-07	14432.6	6143.65
BIRC5	15.839	18.0138	29.6913	43.0267	13.8679	100.559	175.953	121.617	96.9034	337.063	76.3253	16.1194	98.2565	135.345	2.37044	5.82595e-06	2.29094e-05	24.0877	128.683
BIRC6	9346.27	9709.46	10702.6	10309.1	10266.7	6419.02	5994.91	5588.06	8111.31	6180.7	6723.41	8971.01	11167.9	7399.88	-0.449453	0.000792317	0.00207479	10066.8	7395.13
BIRC6-AS2	13.9383	19.3649	10.9968	12.0777	13.2375	38.3082	22.9052	24.0701	26.0894	16.9136	25.4418	22.5672	14.3092	31.0793	0.79468	0.00641708	0.0137247	13.923	24.6315
BISPR	620.888	703.44	786.819	648.42	811.903	533.92	744.418	1801.46	2013.85	1336.17	456.256	710.33	1197.2	1856.74	0.689354	0.0275746	0.0501507	714.294	1183.37
BIVM	215.41	244.087	206.189	155.5	201.085	193.935	241.546	78.5445	106.842	106.314	191.661	182.687	165.987	136.348	-0.392841	0.096558	0.149733	204.454	155.985
BLACAT1	5.06848	6.30484	2.19935	3.77427	3.78216	4.78852	8.32916	0	1.24235	0	1.69612	3.22389	0.953947	3.00767	-0.8	0.253651	0.33941	4.22582	2.58241
BLACE	0	0	0.549839	0	0	2.39426	0	2.53369	1.24235	2.41623	0	0	1.90789	0	2.52489	0.107433	0.164051	0.109968	1.16605
BLCAP	2019.15	1863.08	1808.42	1870.53	1956.64	1857.95	1929.24	2070.03	1694.57	1825.46	1899.65	1309.97	1575.92	1579.03	-0.140305	0.141429	0.20767	1903.56	1749.09
BLK	1224.67	1054.26	795.616	428.003	320.853	1326.42	414.375	121.617	2232.5	337.063	167.916	4591.89	521.809	1009.58	0.537224	0.440902	0.534367	764.681	1191.46
BLM	289.537	406.662	337.051	239.289	320.223	387.87	259.245	165.957	182.626	397.469	188.269	491.106	757.434	274.701	0.0491081	0.85386	0.890928	318.552	344.964
BLMH	973.781	1272.68	1009.5	1046.23	925.368	691.942	776.694	529.542	485.759	913.333	542.758	765.136	872.861	576.47	-0.609956	1.88075e-06	8.06164e-06	1045.51	683.833
BLNK	618.354	565.634	602.623	268.728	328.417	720.673	170.748	116.55	612.479	440.961	67.8447	709.256	375.855	579.478	-0.109626	0.820499	0.86485	476.751	421.538
BLOC1S1	136.215	89.6188	89.0738	122.286	127.963	186.752	179.077	283.774	247.228	215.044	296.821	182.687	225.131	184.471	0.953618	2.30622e-13	2.84244e-12	113.031	222.332
BLOC1S2	3166.53	2031.06	2577.64	2669.17	2946.93	3591.39	3908.46	5539.92	4775.6	4356.45	6129.77	3695.65	3210.03	3760.59	0.657759	5.68929e-16	1.03901e-14	2678.27	4329.76
BLOC1S3	666.505	665.611	640.562	623.51	694.026	937.354	873.52	833.585	918.097	942.328	900.639	850.032	579.046	602.537	0.309589	0.00854777	0.0176926	658.043	826.349
BLOC1S4	125.445	167.078	173.749	116.248	148.765	159.218	275.903	177.359	135.416	161.887	164.523	142.926	145.954	132.338	0.191842	0.276527	0.364652	146.257	166.169
BLOC1S6	4462.16	4383.22	5452.75	5764.07	5475.3	2988.04	3736.67	4917.9	4788.02	4807.08	4669.41	3963.23	3879.7	6503.59	-0.194314	0.227379	0.309467	5107.5	4472.63
BLVRA	814.758	909.699	874.243	1108.13	1052.07	739.827	874.561	2087.76	2043.67	1161	758.165	455.643	1552.07	1906.86	0.332124	0.123382	0.184593	951.779	1286.62
BLVRB	100.736	147.713	169.35	148.706	127.963	301.677	258.204	471.267	493.213	314.109	247.633	123.582	501.776	222.568	1.08773	3.96524e-09	2.59517e-08	138.894	326.003
BLZF1	941.47	687.228	1031.5	875.632	1049.55	830.809	827.71	1223.77	1264.71	1281.81	1155.06	934.928	1248.72	1764.5	0.352349	0.0640842	0.105008	917.075	1170.22
BMF	1818.32	1876.59	1604.98	1695.4	1684.32	2760.58	1199.4	2480.49	2008.88	1432.82	1484.1	3535.53	1811.55	2022.16	0.256278	0.298238	0.387975	1735.92	2081.72
BMI1	0.63356	1.80138	0	0	0	1.19713	3.12343	1.26685	1.24235	1.20811	0	1.07463	0	1.00256	1.15316	0.363648	0.456163	0.486989	1.1239
BMP1	62.0888	84.2147	90.7234	83.7889	156.96	41.8996	61.4275	97.5472	62.1175	85.776	78.0214	79.5226	65.8223	90.2302	-0.366843	0.226182	0.308124	95.5551	73.596
BMP10	3.80136	0.900692	3.84887	3.01942	3.1518	15.5627	3.12343	19.0027	9.93881	9.6649	11.8728	12.8956	2.86184	4.01023	1.66702	0.000850878	0.00221138	2.94443	9.88144
BMP2	37.38	5.8545	8.79742	12.0777	8.19467	4.78852	157.213	32.938	39.7552	19.3298	23.7457	3.22389	7.63158	69.1765	1.45097	0.0551033	0.0924129	14.4609	39.7558
BMP2K	2207.96	1297.45	1873.3	2225.31	2062.54	2314.05	1397.22	2039.62	2442.46	2141.98	2444.11	1270.21	2071.97	2622.69	0.0983913	0.60931	0.688555	1933.31	2082.7
BMP3	19.0068	2.70208	1.09968	3.77427	6.93395	22.7455	4.16458	0	0	4.83245	5.08835	7.52241	9.53947	8.02046	-0.220799	0.784341	0.834939	6.70335	6.87925
BMP6	180.564	222.471	212.238	314.02	366.869	217.878	378.977	239.434	91.934	254.912	396.892	111.762	452.171	208.532	0.00332377	0.991678	0.993981	259.232	261.388
BMP8A	281.3	331.455	352.996	301.942	367.5	392.659	307.138	212.83	231.077	304.444	59.3641	199.881	381.579	361.923	-0.348407	0.306449	0.39689	327.039	272.322
BMP8B	119.743	149.965	107.768	101.151	84.4682	101.756	74.9624	34.2049	59.6328	141.349	52.5797	107.463	97.3026	138.353	-0.332394	0.101964	0.15672	112.619	89.7337
BMPER	1.26712	6.75519	1.64952	3.77427	4.41252	3.59139	0	0	0	2.41623	0	1.07463	0	0	-2.16387	0.0646295	0.105801	3.57172	0.786916
BMPR1A	280.667	401.258	342.549	269.483	266.642	82.602	178.036	45.6065	142.87	53.157	66.1486	328.837	124.013	170.435	-1.33936	1.44428e-09	1.01222e-08	312.12	132.412
BMPR1B	2.53424	2.25173	1.64952	5.28398	1.26072	2.39426	1.04114	5.06739	1.24235	2.41623	1.69612	5.37315	0.953947	2.00511	-0.0551838	0.925208	0.945926	2.59604	2.46552
BMPR2	2002.68	2497.17	2661.22	2306.08	2305.22	1347.97	1635.64	1918.01	2657.39	1884.66	761.557	2273.92	3141.35	2439.22	-0.260711	0.206058	0.28519	2354.48	2006.63
BMS1	1568.06	1854.97	1826.01	1708.24	1520.43	890.665	947.441	681.564	652.234	1058.31	569.896	929.555	1503.42	1033.64	-0.914004	3.09355e-19	8.94304e-18	1695.54	918.524
BMS1P20	1722.65	1719.87	1769.38	1188.14	1526.1	1726.26	1748.08	1540.49	1095.75	4881.98	1816.54	1219.7	1884.05	3912.98	0.486512	0.0958807	0.148816	1585.23	2202.87
BMS1P4	727.326	744.872	611.42	498.959	612.709	405.827	357.113	362.318	329.223	472.372	283.252	550.21	582.862	491.253	-0.585147	1.46362e-05	5.34037e-05	639.058	426.048
BMS1P5	72.8594	81.963	106.119	78.5049	52.9502	49.0824	49.9749	40.5391	47.2093	27.7866	33.9224	45.1345	48.6513	51.1304	-0.829806	6.32002e-05	0.000204074	78.4793	43.7145
BMS1P6	11.4041	27.4711	11.5466	33.9685	13.8679	3.59139	5.20572	0	3.72705	3.62434	3.39224	8.59704	11.4474	4.01023	-2.07643	3.30957e-06	1.36205e-05	19.6516	4.84393
BMX	511.283	37.3787	144.058	351.008	443.773	1048.69	967.223	1603.83	2918.28	1512.56	2718.88	1725.86	2128.26	806.056	2.62571	1.10342e-10	9.23229e-10	297.5	1714.4
BNC2	375.701	904.295	868.745	255.141	666.29	134.079	424.787	50.6739	68.3293	256.12	215.407	929.555	318.618	238.609	-1.25864	0.00132443	0.00330376	614.034	292.909
BNIP1	354.16	400.808	567.983	555.573	509.33	160.416	327.96	315.445	195.049	282.698	225.584	363.225	204.145	539.376	-0.728578	0.00117898	0.00297493	477.571	290.433
BNIP2	9255.67	6821.84	8983.81	11201.3	9217.75	10066.7	7164.11	10390.7	10809.7	8837.34	13770.8	10043.5	9004.31	10214.1	0.132302	0.294344	0.383671	9096.07	10033.5
BNIP3	497.978	485.473	412.379	437.816	342.285	519.555	476.844	426.927	354.07	287.531	437.598	438.449	392.072	363.928	-0.0807632	0.540414	0.627197	435.186	410.775
BNIP3L	11427.5	7461.33	8347.65	10626.8	10022.7	12359.2	11365.1	14153.2	10684.2	10894.8	20573.9	9527.67	8270.72	8216.96	0.250782	0.036864	0.0650782	9577.21	11782.9
BNIPL	89.3319	46.3856	70.9292	54.3496	61.7752	243.018	260.286	367.386	339.162	283.906	283.252	171.941	130.691	166.425	1.88867	2.41003e-21	9.36068e-20	64.5543	249.563
BOC	1.90068	0.450346	0	3.01942	3.1518	0	0	1.26685	4.9694	1.20811	5.08835	1.07463	0.953947	8.02046	0.643401	0.502953	0.592813	1.70445	2.50908
BOD1	345.29	372.886	379.938	351.008	305.724	140.064	229.052	212.83	171.444	178.801	128.905	173.015	254.704	257.657	-0.859417	1.96526e-12	2.12152e-11	350.969	194.053
BOD1L1	21922.4	9636.5	15921.1	20547.9	20386.5	24548.4	17345.5	19893.3	23055.5	20241.9	34809.4	22826.2	20344.8	14993.2	0.315651	0.088192	0.138318	17682.9	22006.5
BOK	19.0068	45.0346	51.135	0	33.4091	5.98565	42.6869	3.80054	2.4847	15.7055	10.1767	26.8657	12.4013	14.0358	-0.989772	0.142351	0.208826	29.7171	14.9048
BOLA1	20.2739	23.418	21.9935	10.568	16.3893	14.3656	21.864	12.6685	9.93881	15.7055	78.0214	8.59704	27.6645	15.0384	0.166092	0.706515	0.770666	18.5286	22.6515
BOLA3	27.8766	47.7367	42.8874	41.517	51.6895	37.1111	54.1395	25.3369	26.0894	68.8624	22.0495	32.2389	26.7105	51.1304	-0.141823	0.574455	0.658178	42.3414	38.1854
BOLA3-AS1	88.6983	88.2678	77.5272	76.9952	86.3593	104.15	164.501	117.817	141.628	130.476	132.297	103.164	88.7171	189.483	0.643695	0.000234175	0.000677897	83.5696	130.248
BOLL	21.541	18.4642	17.5948	12.0777	16.3893	7.18279	3.12343	2.53369	2.4847	1.20811	3.39224	46.2091	14.3092	15.0384	-1.31982	0.00724493	0.0152852	17.2134	10.6091
BOP1	35.4793	56.2932	45.0868	26.4199	35.9305	34.7168	71.839	40.5391	69.5717	79.7354	57.668	37.612	34.3421	67.1713	0.464038	0.139073	0.20465	39.842	54.7995
BORA	448.56	476.016	534.993	453.668	474.661	246.609	279.027	226.766	232.32	281.49	139.082	371.822	479.835	329.841	-0.781363	1.35517e-09	9.51175e-09	477.579	287.421
BPGM	696.282	765.588	870.944	917.149	1103.13	806.866	812.093	1459.41	1156.63	1051.06	912.512	889.794	733.585	961.452	0.140722	0.248573	0.333721	870.618	975.933
BPHL	94.4004	112.136	110.518	110.209	93.2932	88.5877	51.0161	38.0054	59.6328	49.5326	40.7068	49.433	70.5921	34.0869	-0.956702	3.20067e-06	1.32181e-05	104.111	53.5104
BPI	280.667	127.898	208.389	1801.84	585.604	515.963	6620.64	1380.86	5052.64	759.903	2366.08	381.494	476.973	774.977	1.90413	0.0122662	0.0244899	600.879	2036.62
BPIFB3	1.26712	0.450346	2.74919	0	1.26072	2.39426	7.28801	0	0	0	8.48059	0	0	0	0.537922	0.685531	0.753984	1.14548	2.0181
BPNT1	470.101	523.302	542.691	434.042	477.813	231.046	352.948	293.909	429.853	316.526	162.827	243.941	653.454	243.621	-0.669351	5.99832e-05	0.00019448	489.59	325.347
BPTF	7926.46	6844.36	7797.81	7835.39	8008.09	6596.19	6011.57	6787.77	8491.47	7226.93	7713.95	8966.71	8693.32	7452.01	-0.0235077	0.819695	0.86405	7682.42	7548.88
BRAF	1275.36	820.981	841.253	1202.48	1275.22	938.551	671.538	1064.15	1462.25	1123.54	1512.94	1383.05	1118.98	1016.59	0.0779363	0.630574	0.706828	1083.06	1143.51
BRAP	1318.44	967.343	1150.26	1141.34	1151.04	1525.14	1502.37	2073.83	1844.89	2038.09	1796.19	1470.09	1499.6	1815.63	0.583225	1.37964e-08	8.32383e-08	1145.68	1729.54
BRAT1	211.609	190.947	245.778	195.507	225.669	350.759	250.916	366.119	383.886	283.906	335.831	284.777	148.816	504.286	0.57938	0.0339583	0.060481	213.902	323.255
BRCA1	589.21	327.401	467.913	660.498	553.456	1205.51	991.169	1023.61	1620.03	1519.81	1127.92	796.301	1328.85	955.437	1.16142	2.55269e-10	2.01426e-09	519.696	1174.29
BRCA2	288.903	308.037	468.462	368.369	397.757	366.322	391.47	400.324	694.474	665.67	279.86	336.359	497.006	768.961	0.422605	0.169196	0.241728	366.306	488.939
BRCAT107	0	4.95381	0	0	0	31.1254	27.0698	0	2.4847	6.04056	81.4137	0	0	0	4.11119	0.0598047	0.0990384	0.990761	16.4593
BRCAT54	8.23628	11.2586	8.24758	3.77427	6.3036	2.39426	9.3703	5.06739	2.4847	8.45679	1.69612	7.52241	8.58552	10.0256	-0.317594	0.477769	0.569741	7.56407	6.17812
BRCC3	1046.64	1122.71	925.928	1065.1	1104.39	924.185	972.429	1048.95	752.865	1028.1	1126.22	881.196	1043.62	808.061	-0.148002	0.168863	0.24138	1052.95	953.959
BRD1	617.087	636.789	660.356	667.292	659.986	647.648	701.731	554.879	616.206	541.234	653.006	877.973	631.513	545.391	-0.0169806	0.893947	0.922256	648.302	641.065
BRD2	15395.5	12176.5	15302	17958	16127.7	20439.8	19079	29963.5	27344.1	25220.6	39183.7	20966	17295.1	33467.4	0.715537	3.13576e-07	1.51161e-06	15391.9	25884.3
BRD3	601.248	466.108	517.948	532.928	485.377	586.594	685.073	673.963	726.775	530.361	853.147	699.584	841.381	400.02	0.34771	0.0399003	0.0697213	520.722	666.322
BRD4	1794.24	1154.24	1486.21	1336.09	1578.42	2364.33	2508.12	2764.26	3605.3	2775.03	3918.03	3199.17	2211.25	2231.69	0.929199	4.55962e-15	7.22879e-14	1469.84	2841.91
BRD7	3082.9	2886.27	2968.03	2728.8	2781.78	2241.03	2594.53	2893.48	3409.01	2251.92	1838.59	3784.85	2977.27	3486.89	-0.027418	0.857743	0.893594	2889.55	2830.84
BRD7P3	22.8081	15.3118	23.6431	23.4005	33.4091	59.8565	23.9463	32.938	24.847	30.2028	66.1486	21.4926	8.58552	14.0358	0.258218	0.372076	0.465015	23.7145	31.3393
BRD8	2555.78	1576.66	1674.81	1891.67	1846.95	1974.07	1997.96	2484.29	2125.66	1647.87	3081.85	2302.93	2524.14	1277.26	0.164277	0.409912	0.503619	1909.17	2157.34
BRD9	992.154	1119.56	1084.28	1050.76	950.582	1040.31	1025.53	1000.81	904.431	881.922	919.296	1150.93	979.704	990.527	-0.0686658	0.3387	0.430931	1039.47	988.161
BRDT	0	1.80138	3.29903	5.28398	2.52144	2.39426	2.08229	2.53369	1.24235	2.41623	1.69612	2.14926	0.953947	0	-0.62655	0.455805	0.548647	2.58117	1.71868
BRE	703.251	727.309	707.092	973.008	854.768	1201.92	958.894	1521.48	1064.69	1069.18	1563.82	963.943	909.111	827.11	0.457623	3.10069e-05	0.000106053	793.086	1120.02
BRE-AS1	17.1061	10.8083	67.6301	38.4976	45.3859	31.1254	124.937	101.348	201.261	166.72	191.661	231.045	35.296	148.378	1.84042	3.87822e-06	1.57492e-05	35.8856	136.864
BREA2	31.0444	53.5912	27.4919	21.8908	25.2144	27.534	37.4812	8.86793	13.6659	7.24868	15.2651	39.7613	17.171	36.0921	-0.554246	0.0825914	0.130678	31.8465	22.5652
BRF1	167.26	224.272	258.424	197.017	218.104	118.516	186.365	92.4798	126.72	125.644	128.905	190.209	165.987	133.34	-0.596353	0.000303975	0.000861701	213.016	140.907
BRF2	243.287	217.967	236.431	241.554	225.669	391.462	488.297	508.006	503.152	518.28	456.256	276.18	327.204	394.005	0.84891	4.19495e-12	4.32544e-11	232.981	429.205
BRI3	1224.67	548.521	909.983	1116.43	1134.02	4064.26	3822.04	6427.98	5432.8	4787.75	5123.97	2394.28	2269.44	3122.97	2.01652	3.12459e-50	5.93454e-47	986.724	4160.61
BRI3BP	5.06848	6.30484	8.24758	6.79369	7.56431	5.98565	14.576	12.6685	12.4235	10.873	8.48059	12.8956	7.63158	8.02046	0.614241	0.0844382	0.133234	6.79578	10.395
BRICD5	3.80136	6.30484	3.84887	6.03884	6.93395	10.7742	26.0286	11.4016	12.4235	2.41623	16.9612	6.44778	2.86184	4.01023	0.912	0.0981911	0.151769	5.38557	10.3695
BRIP1	103.904	131.051	119.865	163.804	134.267	80.2078	183.241	68.4097	99.3881	146.182	59.3641	108.538	129.737	89.2276	-0.313882	0.318619	0.409829	130.578	107.144
BRIX1	893.953	1010.58	1131.57	961.685	943.018	344.774	579.917	377.52	355.312	449.418	274.771	741.495	489.375	824.102	-1.0356	1.2817e-11	1.22575e-10	988.16	492.965
BRK1	4270.83	4208.93	4719.26	5601.78	5146.26	4133.69	4694.52	5629.87	3981.73	4270.68	5091.75	3361.44	4312.79	3742.55	-0.154772	0.124188	0.18568	4789.41	4357.67
BRMS1	847.069	636.789	686.199	800.901	837.117	1035.52	1421.16	2109.3	2044.91	1548.8	1826.72	1140.18	829.934	1503.84	0.917672	1.47442e-07	7.50365e-07	761.615	1495.6
BRMS1L	328.817	360.277	420.626	369.124	343.546	148.444	145.76	168.491	118.023	164.303	144.17	256.837	143.092	299.765	-1.05784	2.2624e-12	2.41675e-11	364.478	176.543
BROX	4984.21	3760.39	4055.61	4696.71	4659.62	5924.6	4972.51	8016.61	7808.18	6469.44	6384.19	5518.22	6343.75	5578.23	0.50285	1.36032e-05	4.98391e-05	4431.31	6335.08
BRPF1	1670.7	1507.31	1444.43	2115.1	1706.38	1403.04	1645.01	1880	1657.3	1623.7	1799.58	1553.91	1102.76	1912.88	-0.0707368	0.620406	0.698191	1688.78	1619.8
BRPF3	2341.64	1454.62	1738.59	1761.83	1907.47	1917.8	1678.32	2167.58	1962.91	1997.01	2947.85	2271.77	2002.33	1814.63	0.169865	0.157209	0.22727	1840.83	2084.47
BRSK1	27.8766	38.2794	20.344	25.6651	32.1483	33.5197	37.4812	83.6119	80.7528	36.2434	16.9612	37.612	78.2236	71.1816	0.811414	0.0028304	0.00656944	28.8627	52.843
BRSK2	6.96916	1.80138	0	0.754855	5.67324	5.98565	8.32916	2.53369	2.4847	0	5.08835	4.29852	0	4.01023	0.22998	0.780321	0.831732	3.03973	3.6367
BRWD1	10341.6	10591.7	10925.8	10340	10493.6	6515.98	5988.66	4730.41	5263.84	4987.09	6048.36	9485.76	7003.88	6552.71	-0.75476	3.09721e-21	1.19321e-19	10538.5	6286.3
BRWD1-AS1	0.63356	6.75519	3.29903	1.50971	2.52144	1.19713	2.08229	2.53369	0	0	1.69612	0	4.76973	3.00767	-0.804696	0.269127	0.356702	2.94379	1.69852
BRWD1-IT2	1.90068	7.20553	1.09968	6.79369	2.52144	5.98565	2.08229	2.53369	1.24235	2.41623	1.69612	3.22389	4.76973	1.00256	-0.489687	0.407036	0.500702	3.9042	2.7725
BRWD3	8582.2	5763.53	6916.97	8415.12	8357.31	8423.01	5604.48	7552.94	10191	8284.03	11923.7	10218.7	9659.67	7884.11	0.220456	0.14711	0.214647	7607.02	8860.18
BSCL2	63.9895	31.5242	62.1318	60.3884	45.3859	37.1111	54.1395	39.2723	19.8776	49.5326	28.834	39.7613	74.4079	39.0997	-0.357567	0.1583	0.228586	52.684	42.4484
BSDC1	3615.72	3194.75	3095.04	3151.52	3642.85	2892.27	2716.35	2898.55	3046.24	2546.7	3846.8	3634.4	3551.54	3002.66	-0.095437	0.393856	0.486949	3339.98	3126.17
BSG	741.898	428.729	567.433	692.957	692.765	1267.76	1940.69	1693.77	1760.41	891.587	2678.17	1112.24	1043.62	1296.31	1.24986	4.46583e-06	1.79702e-05	624.757	1520.51
BSN	10.7705	19.3649	16.4952	16.6068	16.3893	16.7598	9.3703	2.53369	3.72705	6.04056	6.78447	8.59704	17.171	16.0409	-0.763034	0.0371864	0.0655604	15.9253	9.66944
BSND	0	1.35104	0	1.50971	1.26072	2.39426	2.08229	7.60108	2.4847	13.2892	20.3534	25.7911	9.53947	4.01023	3.46241	0.000701023	0.00185801	0.824293	9.72731
BSPRY	13.3048	28.8221	13.746	15.0971	22.6929	14.3656	13.5349	5.06739	24.847	9.6649	10.1767	34.3882	9.53947	14.0358	-0.356123	0.273632	0.361537	18.7326	15.0689
BST1	3826.07	1396.52	2279.63	4915.62	3574.14	6425	5095.36	9122.57	9051.77	8213.96	13502.8	4365.15	4435.85	7254.5	1.20828	1.97277e-12	2.1277e-11	3198.39	7496.33
BST2	750.768	1070.47	1235.49	914.129	1023.07	1078.61	1713.72	3515.5	4435.19	2328.03	1024.46	801.674	1515.82	4205.73	1.13729	0.00087234	0.00226066	998.786	2290.97
BTAF1	11097.4	11432	11046.3	11473	10230.1	7841.21	5314	6626.88	7569.64	6256.82	7992.11	9292.32	10806.3	7218.41	-0.522845	0.000532143	0.00144098	11055.8	7657.52
BTBD1	3253.33	3679.78	3544.26	3828.62	3700.84	2930.58	2704.89	3129.11	2562.97	3023.91	2338.95	2829.5	3029.74	2800.14	-0.354392	9.91905e-05	0.000308992	3601.37	2816.64
BTBD10	1503.44	929.064	1226.69	1364.78	1372.92	2266.17	1491.96	1525.28	2105.78	1908.82	2508.56	2041.8	2431.61	1654.22	0.640577	1.52142e-05	5.53145e-05	1279.38	1992.69
BTBD11	420.05	634.988	519.597	249.102	351.741	670.393	562.218	404.124	185.11	161.887	142.474	291.225	260.428	305.78	-0.347502	0.310671	0.401291	435.096	331.515
BTBD18	20.2739	7.65588	10.4469	17.3617	10.7161	11.9713	3.12343	2.53369	6.21175	6.04056	8.48059	5.37315	8.58552	8.02046	-0.947374	0.0120609	0.0241053	13.2909	6.7045
BTBD19	95.6675	59.4457	113.817	92.8472	93.2932	271.749	220.723	238.167	327.981	235.582	922.688	334.21	486.513	485.238	2.08497	5.23802e-10	3.93535e-09	91.014	391.428
BTBD2	100.102	122.944	141.309	83.7889	106.531	158.021	290.479	282.507	419.915	242.831	235.76	211.702	161.217	216.552	1.11377	2.77358e-05	9.57618e-05	110.935	246.554
BTBD3	269.263	399.006	369.492	376.673	332.83	430.967	239.463	319.245	392.583	270.617	123.817	144	311.941	360.921	-0.304473	0.168557	0.241051	349.453	288.173
BTBD6	407.379	433.233	365.643	449.139	409.103	306.466	476.844	321.779	203.746	372.099	413.853	313.792	245.164	245.627	-0.364529	0.0553889	0.0927619	412.899	322.152
BTBD7	2287.78	2160.76	2260.94	2389.12	2396.63	1672.39	1578.37	1695.04	1716.93	1512.56	1629.97	1952.6	1907.89	1591.06	-0.4391	4.27643e-08	2.37299e-07	2299.04	1695.2
BTBD8	52.5854	27.9214	41.7877	26.4199	28.3662	51.4766	26.0286	24.0701	48.4517	38.6596	47.4913	54.8061	25.7566	34.0869	0.119457	0.61513	0.693485	35.4161	38.9808
BTBD9	1035.24	920.957	992.459	1076.42	1008.58	922.988	740.254	817.116	1022.45	862.592	1194.07	1056.36	586.677	906.312	-0.187837	0.0492219	0.0838225	1006.73	900.98
BTD	604.416	559.78	535.543	594.826	619.013	442.938	426.869	468.733	329.223	376.931	478.305	401.912	345.329	313.8	-0.559823	6.16059e-08	3.33547e-07	582.715	398.227
BTF3	13034.2	12673.6	13460	13277.1	11835	7765.79	9111.05	8116.69	6209.27	7168.94	6945.6	7610.53	7995.03	8008.43	-0.746788	8.43221e-18	1.98209e-16	12856	7659.04
BTF3L4	2475.32	2388.63	2618.33	2654.82	2182.94	2312.86	2019.82	2470.35	1769.11	2121.45	1964.1	1640.96	2962.01	1924.91	-0.226793	0.0429343	0.0742873	2464.01	2131.73
BTG1	25735.2	19037.9	25096.3	22201	25078.2	38465	33124	29973.6	34703.8	28265	49021.2	48236.9	16955.5	22140.5	0.459662	9.26728e-05	0.000290355	23429.7	33431.7
BTG2	22918.4	12312.9	18794.6	25285.4	17706.8	35208.8	21113.4	24532.5	26888.2	23579.9	47219.9	23503.2	26850.7	27968.3	0.551796	0.00348973	0.00794634	19403.6	28540.6
BTG3	495.444	488.625	781.321	576.709	699.069	351.956	395.635	319.245	212.442	304.444	293.428	563.106	120.197	578.476	-0.864887	0.000417117	0.00115217	608.233	348.77
BTK	5399.83	4997.04	4636.24	5755.77	5209.92	7896.28	5087.03	7810.11	7555.98	8774.52	6989.7	4207.18	8200.13	5312.55	0.362466	0.00422187	0.00943253	5199.76	6870.39
BTLA	1609.24	1343.38	1113.97	852.986	581.822	2455.32	848.533	430.728	977.73	700.705	291.732	1557.14	1199.11	1038.65	-0.0558897	0.883918	0.914492	1100.28	1055.52
BTN1A1	6.3356	6.75519	9.89709	3.01942	5.67324	81.4049	41.6458	86.1456	81.9952	73.6949	52.5797	22.5672	46.7434	49.1253	3.13573	7.14781e-19	1.9761e-17	6.33611	59.5447
BTN2A1	6391.35	4274.23	5556.67	5949.77	6446.06	14127.3	9816.95	15423.9	20100	17575.6	14408.5	10160.6	12286.8	13215.7	1.27946	8.58386e-19	2.35597e-17	5723.61	14123.9
BTN2A2	1493.93	1158.29	1266.83	1112.66	1151.04	3347.18	2238.46	2629.97	3459.95	3327.14	1482.41	959.644	3313.06	2797.13	1.01985	2.56921e-05	8.9339e-05	1236.55	2617.22
BTN2A3P	195.136	175.185	201.241	187.204	165.785	439.347	284.232	548.545	600.055	471.164	325.655	102.09	425.46	386.987	1.01085	0.000178819	0.000531421	184.91	398.171
BTN3A1	21790.7	14228.7	17341.4	16925.4	17786.2	42541.2	28447.2	32475.6	62464.2	52511.8	25426.5	24294.2	31203.6	31392.1	1.05489	7.73547e-05	0.000245919	17614.5	36750.7
BTN3A2	6094.21	10371	6053.72	5687.83	11506.6	10812.5	14209.5	16159.9	22390.9	15338.2	5587.01	8372.44	16625.4	11533.4	0.717095	0.00437933	0.00974651	7942.67	13447.7
BTN3A3	5453.68	6217.48	6488.64	5275.68	6391.85	5699.54	6461.34	7445.26	9379.75	8037.57	4019.8	3954.64	8203.94	6103.57	0.113237	0.56033	0.645975	5965.47	6589.49
BTNL10	0.63356	4.05311	3.29903	0.754855	0	0	3.12343	1.26685	2.4847	0	1.69612	0	0.953947	4.01023	-0.0351301	0.972773	0.980985	1.74811	1.50392
BTNL2	20.2739	33.3256	13.746	9.05826	2.52144	20.3512	13.5349	2.53369	27.3317	14.4974	0	127.881	8.58552	20.0511	0.544709	0.474826	0.566872	15.785	26.0852
BTNL3	1060.58	227.875	0	264.954	0	1904.64	0	1877.47	49.694	1564.51	2864.74	1780.66	0	530.353	1.29561	0.468983	0.561449	310.682	1174.67
BTNL8	860.374	155.82	727.436	783.539	1207.77	3221.48	3230.67	3145.58	5037.73	3392.38	5239.31	1296	1590.23	1292.3	1.98334	1.44746e-11	1.36978e-10	746.988	3049.52
BTNL9	11.4041	9.90761	41.2379	10.568	22.6929	22.7455	27.0698	12.6685	120.508	21.746	15.2651	8.59704	16.2171	65.1662	0.764005	0.187923	0.263484	19.1621	34.4426
BTRC	693.114	817.828	812.112	778.255	659.356	508.781	525.778	338.248	336.677	355.185	361.273	593.196	642.96	636.624	-0.673594	1.64088e-09	1.13825e-08	752.133	477.636
BUB1	56.3868	48.187	78.6269	66.4272	63.6663	293.297	219.681	212.83	203.746	1309.59	84.8059	65.5524	445.493	393.002	2.41643	8.17271e-06	3.13521e-05	62.6589	358.667
BUB1B	43.7156	39.1801	53.3343	89.8277	62.4056	93.3762	190.529	103.881	149.082	378.139	64.4525	63.4032	154.539	153.391	1.33588	0.00436341	0.00971333	57.6927	150.088
BUB3	3512.45	3741.92	3336.97	3532.72	3493.45	1992.03	2608.07	1801.46	1534.3	2087.62	1819.93	2810.16	2148.29	1977.04	-0.758057	1.01066e-17	2.36106e-16	3523.5	2086.54
BUD13	627.858	573.29	653.758	672.576	615.231	517.161	723.595	903.262	795.105	729.7	566.503	540.539	1176.22	641.637	0.174026	0.0936258	0.145709	628.543	732.635
BUD31	1311.47	819.179	1049.09	1213.81	1252.52	1977.66	1849.07	3298.87	2935.68	2549.12	2732.45	1488.36	1413.75	2785.1	1.01437	2.18033e-13	2.69714e-12	1129.21	2336.67
BVES	3.80136	0	5.49839	3.77427	1.26072	7.18279	3.12343	2.53369	6.21175	20.5379	3.39224	2.14926	23.8487	20.0511	1.71148	0.110392	0.167869	2.86695	9.89232
BYSL	102.637	141.409	135.81	115.493	137.418	178.373	119.732	88.6793	110.569	184.841	150.955	203.105	134.507	121.309	0.185065	0.459571	0.552446	126.553	143.563
BZRAP1	704.518	1405.98	1388.34	883.18	1313.04	1072.63	1092.16	880.459	947.914	797.354	1704.6	1883.83	648.684	2152.49	0.0586864	0.810462	0.856551	1139.01	1242.24
BZRAP1-AS1	700.717	584.099	638.363	585.013	714.197	392.659	424.787	407.925	344.131	450.626	590.249	387.941	266.151	723.846	-0.552547	0.00220036	0.00522976	644.478	443.146
BZW1	7218.14	7012.34	8703.39	9708.19	8449.97	6707.52	6736.2	6623.08	7604.43	6718.31	10027.5	8229.52	5726.54	8179.86	-0.169443	0.0520467	0.0878688	8218.41	7394.77
BZW2	708.953	767.84	766.475	672.576	647.379	499.204	580.959	372.453	336.677	681.376	344.312	263.284	495.098	424.082	-0.690894	4.20537e-05	0.000140324	712.645	444.16
C10orf10	147.619	194.549	160.003	119.267	82.5771	100.559	103.073	172.291	134.174	112.354	98.3749	73.0748	714.506	93.2378	0.0203792	0.940983	0.957826	140.803	177.961
C10orf105	929.432	514.295	705.443	782.03	760.844	3144.86	2734.05	2708.52	4666.27	3270.36	3629.69	3073.44	2665.33	1620.13	2.03641	6.65976e-25	3.95278e-23	738.409	3056.96
C10orf11	53.8526	77.0092	58.2829	117.757	73.1217	87.3906	86.415	136.819	125.477	103.898	78.0214	50.5076	134.507	67.1713	0.273853	0.0824891	0.130549	76.0047	96.6897
C10orf111	3.1678	4.95381	2.74919	0.754855	1.26072	3.59139	3.12343	3.80054	8.69646	12.0811	10.1767	6.44778	0.953947	45.1151	1.97558	0.00412555	0.00924235	2.57727	10.4429
C10orf113	6.96916	0	0	0	0	0	0	1.26685	0	0	39.0107	0	0	0	-0.562054	0.87316	0.905928	1.39383	4.47529
C10orf12	802.72	692.182	808.813	1046.23	885.025	800.881	475.803	701.833	817.467	898.836	987.141	1270.21	860.46	793.023	-0.00969758	0.956539	0.968635	846.994	845.073
C10orf128	891.418	1632.5	1134.32	1040.19	2131.88	4149.26	4591.45	1997.82	2572.91	5418.38	2540.79	2387.83	1256.35	753.923	1.07795	0.00868333	0.0179378	1366.06	2852.08
C10orf131	18.3732	29.2725	31.3408	36.233	32.7787	195.132	89.5384	191.294	151.567	137.725	291.732	136.478	86.8092	85.2174	2.22352	1.27022e-16	2.58024e-15	29.5996	151.721
C10orf2	268.629	283.718	272.17	190.978	284.292	113.727	164.501	57.0081	101.873	184.841	108.552	130.03	347.237	235.601	-0.794278	0.000121929	0.00037418	259.958	160.374
C10orf25	153.955	211.663	160.553	159.274	174.61	153.233	160.336	216.631	144.113	158.263	91.5904	76.2987	274.737	191.488	-0.15628	0.33863	0.43087	172.011	162.966
C10orf32	699.45	962.84	1041.39	1062.08	1060.9	521.949	731.925	732.238	508.122	712.786	412.157	353.553	491.283	428.092	-0.854065	8.1153e-06	3.1176e-05	965.332	543.567
C10orf35	27.8766	35.5773	36.2893	21.8908	11.9768	11.9713	17.6995	10.1348	0	1.20811	20.3534	9.67167	12.4013	18.046	-1.23227	0.0274386	0.0499512	26.7222	11.2762
C10orf54	13849	7900.42	11395.4	12388.7	15341.7	35281.8	41211.6	33485.3	53368.9	41199.1	68753.8	39663.5	19996.6	20095.3	1.62642	2.62374e-12	2.76848e-11	12175	39228.4
C10orf55	0.63356	0.450346	0.549839	8.3034	0.63036	8.37992	9.3703	7.60108	3.72705	1.20811	30.5301	2.14926	0	9.02302	1.68585	0.0332638	0.0593444	2.1135	7.99876
C10orf67	1.26712	2.70208	1.09968	6.79369	0.63036	0	1.04114	0	0	0	0	1.07463	1.90789	3.00767	-1.91304	0.095656	0.148528	2.49859	0.78126
C10orf76	1702.37	1971.16	1856.8	2158.13	1913.77	1253.4	1519.03	1947.14	1534.3	1546.38	1212.72	1278.81	1792.47	1722.39	-0.336392	0.000291968	0.000830514	1920.45	1534.07
C10orf82	2.53424	4.05311	0	0	0.63036	0	0	0	0	0	0	0	0.953947	0	-2.40242	0.101582	0.156247	1.44354	0.105994
C10orf88	394.074	484.572	352.447	352.517	321.483	237.032	279.027	176.092	121.75	175.176	140.778	335.285	393.98	223.57	-0.757381	1.85004e-08	1.09259e-07	381.019	231.41
C10orf91	2.53424	2.25173	4.39871	3.77427	0.63036	7.18279	9.3703	0	0	4.83245	3.39224	7.52241	4.76973	9.02302	0.804184	0.145464	0.21267	2.71786	5.12144
C10orf95	1.90068	4.05311	2.74919	0.754855	1.89108	4.78852	0	6.33424	0	0	0	3.22389	1.90789	6.01534	0.152851	0.867769	0.901863	2.26978	2.47443
C11orf1	221.746	215.265	211.688	208.34	156.96	90.982	137.431	65.876	45.967	79.7354	59.3641	99.9406	118.289	137.35	-1.15451	6.793e-12	6.80841e-11	202.8	92.7707
C11orf16	0	0	0	1.50971	0	1.19713	2.08229	0	3.72705	1.20811	0	0	5.72368	2.00511	2.41316	0.0714603	0.11552	0.301942	1.77149
C11orf21	3683.52	3476.67	3399.1	3249.65	4679.16	4019.97	3835.58	5543.72	5822.9	4386.66	5705.74	4507	5205.69	3524.99	0.333097	0.00669388	0.014245	3697.62	4728.03
C11orf24	128.613	118.441	125.363	97.3763	109.683	126.896	94.7441	78.5445	154.052	151.014	62.7564	123.582	171.71	125.32	0.0448247	0.850755	0.888654	115.895	120.958
C11orf30	2350.51	1790.58	2425.89	2089.44	2274.34	2333.21	2019.82	2159.97	2335.62	2289.37	2791.81	2782.22	2455.46	2155.5	0.11541	0.236698	0.320109	2186.15	2369.22
C11orf31	239.486	337.309	285.366	312.51	275.467	257.383	271.739	228.032	203.746	225.917	195.054	196.657	197.467	223.57	-0.383091	0.000677601	0.00180197	290.028	222.174
C11orf42	14.5719	11.709	13.746	21.1359	24.584	23.9426	18.7406	16.469	29.8164	22.9541	50.8835	42.9852	59.1447	17.0435	0.883824	0.0216859	0.0406353	17.1494	31.3311
C11orf45	16.4726	27.9214	8.24758	8.3034	11.9768	7.18279	18.7406	2.53369	9.93881	3.62434	5.08835	2.14926	19.0789	3.00767	-0.98953	0.0255048	0.0468484	14.5844	7.92716
C11orf49	329.451	311.639	334.302	287.6	337.242	184.358	264.451	276.173	229.835	196.922	249.329	286.926	193.651	279.713	-0.415968	0.00195236	0.00469263	320.047	240.151
C11orf54	1825.29	1183.06	1286.62	1413.84	1316.82	2682.77	1580.46	2204.31	2371.65	2204.81	3281.99	1989.14	2472.63	1499.83	0.665897	0.000109945	0.000340206	1405.13	2254.18
C11orf57	1238.61	1408.68	1277.27	1200.22	1139.06	790.106	927.66	784.178	704.413	827.557	551.238	805.972	1155.23	827.11	-0.622059	2.75861e-19	8.02364e-18	1252.77	819.274
C11orf58	6658.08	6878.58	6677.24	6500.81	6495.85	4290.52	4599.78	5115.53	4549.49	4902.52	4426.87	4401.68	5872.5	6108.58	-0.434577	2.79606e-07	1.35959e-06	6642.11	4918.61
C11orf63	131.78	192.298	161.103	141.913	110.943	83.7992	67.6744	22.8032	9.93881	54.3651	47.4913	101.015	47.6973	74.1892	-1.47253	3.82636e-09	2.51467e-08	147.607	56.5526
C11orf65	19.0068	18.9145	14.2958	18.8714	13.8679	8.37992	9.3703	1.26685	6.21175	9.6649	5.08835	17.1941	4.76973	30.0767	-0.895564	0.0152603	0.0298005	16.9913	10.2247
C11orf68	198.938	199.954	200.141	192.488	238.906	387.87	417.499	710.701	723.048	502.575	534.277	203.105	424.506	300.767	1.05664	3.53253e-15	5.68588e-14	206.085	467.15
C11orf71	240.753	233.73	243.029	209.85	250.253	320.831	318.59	310.378	359.039	241.623	329.047	296.598	272.829	331.846	0.38914	2.85168e-05	9.82086e-05	235.523	308.976
C11orf72	0	1.35104	0	0	7.56431	0	5.20572	3.80054	0	2.41623	0	1.07463	1.90789	2.00511	0.0504133	0.968471	0.977642	1.78307	1.82335
C11orf73	267.996	326.951	325.504	310.245	330.308	317.24	414.375	329.38	368.978	283.906	234.064	211.702	399.704	301.77	0.00883599	0.936392	0.954675	312.201	317.902
C11orf74	67.1573	86.0161	75.8777	89.0729	113.465	55.068	63.5098	63.3424	72.0564	53.157	30.5301	19.3433	104.934	58.1483	-0.678135	0.000186809	0.000551541	86.3177	57.7877
C11orf80	421.951	392.251	301.312	271.748	295.639	475.261	213.435	67.1429	151.567	373.307	130.601	796.301	141.184	325.831	-0.359862	0.225454	0.307332	336.58	297.181
C11orf84	37.38	61.6974	49.4855	53.5947	62.4056	63.4479	58.3041	44.3396	45.967	48.3245	42.403	60.1793	43.8816	54.1381	-0.0393801	0.842154	0.882388	52.9126	51.2206
C11orf85	16.4726	15.3118	9.89709	5.28398	2.52144	5.98565	17.6995	24.0701	58.3905	10.873	3.39224	21.4926	20.9868	22.0563	1.16307	0.0602758	0.0996447	9.89737	20.5496
C11orf91	2.53424	0	1.64952	1.50971	1.26072	2.39426	6.24687	3.80054	11.1812	2.41623	3.39224	7.52241	9.53947	9.02302	2.22881	0.00197453	0.00474172	1.39084	6.16846
C11orf94	0	1.35104	1.64952	0	0	1.19713	1.04114	2.53369	0	7.24868	0	1.07463	0.953947	1.00256	1.44994	0.169842	0.242469	0.600111	1.67242
C11orf95	149.52	202.205	190.244	157.01	190.369	108.939	115.567	82.3451	74.5411	80.9435	88.1981	117.135	171.71	104.266	-0.769712	7.94661e-07	3.60215e-06	177.87	104.849
C12orf10	235.051	263.452	236.431	256.651	253.405	288.509	273.821	296.442	239.774	240.414	201.838	202.03	264.243	197.504	-0.0347727	0.754655	0.811067	248.998	244.953
C12orf29	446.026	479.618	456.916	419.699	397.757	202.315	304.014	140.62	167.717	167.928	147.562	379.344	204.145	211.54	-1.06971	4.67858e-16	8.67776e-15	440.003	213.909
C12orf4	608.851	703.891	701.044	634.078	727.435	399.842	478.926	616.955	778.954	669.294	378.234	562.031	784.144	856.184	-0.141804	0.470819	0.563186	675.06	613.841
C12orf40	4.43492	1.80138	3.84887	6.79369	8.19467	1.19713	1.04114	0	0	1.20811	0	2.14926	1.90789	7.0179	-1.94311	0.0142414	0.0279832	5.01471	1.61349
C12orf42	133.048	142.309	111.067	103.415	85.7289	112.53	47.8926	10.1348	162.748	16.9136	16.9612	92.4182	80.1315	55.1406	-0.761598	0.132784	0.196767	115.114	66.0968
C12orf43	223.013	216.166	277.119	221.927	265.381	172.387	223.846	184.96	171.444	211.42	137.386	198.807	265.197	237.606	-0.276401	0.018585	0.0353799	240.721	200.339
C12orf45	102.003	92.3209	88.524	89.0729	68.7092	69.4336	69.7567	46.8733	45.967	80.9435	33.9224	63.4032	52.4671	67.1713	-0.57779	0.00169124	0.00412557	88.126	58.882
C12orf49	1155.61	1617.19	1552.19	1561.04	1494.58	733.841	858.944	663.828	654.719	793.73	627.564	1178.87	1258.26	768.961	-0.830198	7.32277e-10	5.39703e-09	1476.12	837.635
C12orf54	1.90068	3.15242	2.19935	3.01942	6.3036	1.19713	1.04114	0	0	0	1.69612	0	5.72368	0	-2.06083	0.0234334	0.0434852	3.31509	1.07312
C12orf56	0	1.80138	0.549839	3.01942	3.78216	3.59139	4.16458	2.53369	2.4847	0	0	5.37315	2.86184	1.00256	0.434063	0.635076	0.710825	1.83056	2.44577
C12orf57	86.1641	126.998	98.9709	88.318	84.4682	99.3619	171.789	48.1402	65.8446	78.5273	96.6787	128.956	56.2829	116.297	-0.0342778	0.883765	0.914384	96.9838	95.7641
C12orf60	17.1061	15.3118	7.69774	6.79369	6.3036	25.1397	13.5349	13.9353	13.6659	22.9541	18.6573	17.1941	31.4802	14.0358	0.819789	0.0244651	0.0451352	10.6426	18.9553
C12orf65	390.906	419.722	320.006	316.284	304.464	159.218	208.229	105.148	127.962	112.354	83.1098	217.075	287.138	310.793	-1.03917	9.01906e-12	8.84149e-11	350.277	179.003
C12orf66	421.951	463.856	414.028	378.937	300.051	251.397	198.859	98.8141	145.355	113.563	145.866	313.792	303.355	227.58	-1.02481	3.09295e-11	2.78806e-10	395.765	199.842
C12orf71	33.5787	58.0946	33.5402	40.7622	32.1483	44.2938	47.8926	29.1375	39.7552	33.8272	40.7068	99.9406	24.8026	62.1585	0.161764	0.495019	0.585651	39.6248	46.9461
C12orf73	99.4689	157.171	111.067	111.719	120.399	86.1934	82.2504	48.1402	52.1787	44.7002	30.5301	90.2689	112.566	52.133	-0.878205	5.14397e-07	2.40107e-06	119.965	66.5512
C12orf74	9.50339	6.30484	18.6945	0	5.04288	1.19713	2.08229	0	17.3929	7.24868	0	10.7463	0.953947	5.01279	-0.58407	0.569982	0.654515	7.90912	4.95934
C12orf75	782.446	934.918	806.063	1123.22	1082.33	627.297	591.37	291.375	213.684	614.929	420.637	609.315	511.316	604.542	-0.953723	0.000516443	0.00140366	945.796	498.274
C12orf76	370.632	370.635	328.803	295.148	394.605	531.526	717.348	423.127	391.341	414.383	724.242	372.897	471.25	464.184	0.505646	0.0165155	0.0319201	351.965	501.144
C12orf79	276.866	284.168	263.373	175.126	146.874	220.272	185.324	116.55	85.7222	94.2328	222.191	396.538	165.987	164.419	-0.374699	0.0469177	0.0803233	229.281	183.471
C14orf1	218.578	247.24	278.768	316.284	283.662	175.978	382.1	224.232	209.957	225.917	157.739	169.792	181.25	264.675	-0.2819	0.117478	0.177042	268.906	221.293
C14orf119	444.125	393.602	389.836	447.629	455.12	808.063	684.032	965.337	860.949	851.719	725.939	407.285	1154.28	442.128	0.772463	1.34651e-08	8.13949e-08	426.062	766.636
C14orf132	111.506	260.3	93.4726	98.1311	36.5609	13.1684	42.6869	7.60108	1.24235	15.7055	15.2651	37.612	69.6381	47.1202	-2.24281	2.49409e-07	1.22467e-06	119.994	27.7822
C14orf142	114.674	132.852	122.064	144.932	114.725	160.416	150.966	193.828	137.901	163.095	133.993	67.7017	156.447	125.32	0.136122	0.313568	0.40429	125.85	143.296
C14orf159	5145.77	2578.68	3799.93	3318.34	4184.96	5719.89	8507.19	9743.32	7947.32	9837.66	8845.26	7766.35	4844.14	10162.9	1.09501	3.0943e-09	2.06066e-08	3805.54	8152.67
C14orf166	1682.1	1868.94	1979.42	2071.32	1805.98	1740.63	1911.54	2294.26	1652.33	2061.04	1329.76	1344.36	2021.41	2088.33	-0.0546267	0.603294	0.682939	1881.55	1827.07
C14orf169	272.431	326.951	271.07	241.554	252.144	101.756	186.365	88.6793	113.054	144.974	89.8943	120.359	174.572	196.501	-1.02242	7.89999e-11	6.73752e-10	272.83	135.128
C14orf178	0.63356	0.450346	3.29903	0.754855	3.1518	1.19713	2.08229	3.80054	0	2.41623	6.78447	7.52241	0	3.00767	0.573747	0.465175	0.55784	1.65792	2.97897
C14orf2	2242.8	1932.43	2082.24	2457.05	2303.33	4142.07	3609.65	5519.65	3682.33	3278.82	5008.64	2054.69	3428.49	2855.28	0.700651	2.42962e-08	1.40989e-07	2203.57	3731.07
C14orf28	223.647	222.021	223.784	152.481	211.17	175.978	157.213	165.957	176.414	167.928	181.485	167.642	225.131	125.32	-0.276505	0.0271513	0.0495326	206.621	171.452
C14orf37	0	1.35104	0	0	0	4.78852	0	6.33424	1.24235	1.20811	1.69612	4.29852	0.953947	0	2.74534	0.0178773	0.034173	0.270208	2.2802
C14orf79	15.839	16.6628	9.89709	18.1165	26.4751	43.0967	26.0286	39.2723	53.4211	30.2028	39.0107	30.0896	20.0329	18.046	0.883332	0.000849034	0.00220688	17.3981	33.2445
C14orf80	24.0753	14.8614	17.045	22.6456	17.0197	13.1684	21.864	21.5364	16.1506	21.746	39.0107	8.59704	6.67763	25.0639	-0.0608718	0.854464	0.891303	19.1294	19.3128
C14orf93	472.002	410.715	381.038	403.093	362.457	911.017	689.238	1344.12	1356.65	989.444	900.639	571.703	630.559	713.821	1.06512	1.14209e-15	1.98824e-14	405.861	900.799
C15orf26	184.366	54.9422	41.2379	99.6409	120.399	220.272	185.324	53.2076	13.6659	124.436	115.336	34.3882	41.9737	74.1892	-0.0428368	0.934041	0.9527	100.117	95.8658
C15orf27	6.96916	4.95381	4.39871	3.77427	10.7161	3.59139	7.28801	5.06739	2.4847	6.04056	3.39224	5.37315	4.76973	13.0332	-0.12328	0.791976	0.841463	6.16241	5.67116
C15orf39	2593.79	1580.26	2152.07	2439.69	2675.25	3353.16	4393.63	5322.02	5332.17	4959.3	4357.33	2224.48	1290.69	5132.09	0.780695	0.00387125	0.00872203	2288.21	4040.54
C15orf40	385.838	435.484	337.601	305.716	309.507	379.491	336.29	366.119	250.955	273.033	257.81	279.404	469.342	267.683	-0.159651	0.204964	0.2838	354.829	320.014
C15orf41	108.972	111.686	120.415	104.17	109.683	57.4623	68.7155	30.4043	45.967	60.4056	54.2758	70.9256	85.8552	50.1279	-0.943739	6.59641e-09	4.17898e-08	110.985	58.2377
C15orf43	25.9759	9.00692	8.79742	17.3617	18.2804	10.7742	16.6583	6.33424	4.9694	3.62434	40.7068	64.4778	1.90789	9.02302	-0.340298	0.430193	0.523727	15.8845	17.6084
C15orf48	10.7705	12.6097	42.3376	25.6651	22.6929	29.9283	35.3989	50.6739	59.6328	90.6084	72.9331	24.7165	17.171	95.2429	1.18477	0.0104607	0.0212323	22.8152	52.9229
C15orf52	349.091	257.598	259.524	274.767	307.615	554.272	555.971	283.774	226.108	467.54	647.917	481.434	653.454	262.67	0.662527	0.00712275	0.0150598	289.719	459.238
C15orf53	43.0821	14.4111	19.7942	40.7622	27.7358	7.18279	12.4937	5.06739	1.24235	3.62434	13.5689	4.29852	9.53947	18.046	-1.75413	0.000314563	0.000888532	29.1571	8.3404
C15orf54	85.5306	100.877	105.019	46.801	180.283	96.9676	22.9052	24.0701	2.4847	50.7407	8.48059	3.22389	24.8026	23.0588	-1.89517	0.00313263	0.00720315	103.702	28.526
C15orf56	0.63356	2.25173	2.19935	0	0.63036	0	2.08229	0	0	0	0	4.29852	0	1.00256	-0.761884	0.567924	0.652664	1.143	0.820374
C15orf57	757.737	735.415	762.626	809.204	721.762	683.562	731.925	866.523	920.582	989.444	883.678	914.51	888.125	961.452	0.202895	0.101103	0.155688	757.349	871.089
C15orf61	20.9075	25.2194	12.6463	11.3228	16.3893	11.9713	14.576	7.60108	7.45411	3.62434	3.39224	8.59704	10.4934	15.0384	-0.891689	0.0117213	0.0235033	17.2971	9.19421
C15orf62	136.215	149.064	163.852	117.757	131.115	113.727	127.02	82.3451	104.357	101.481	111.944	182.687	133.553	107.274	-0.240823	0.0896921	0.140369	139.601	118.265
C15orf65	6.3356	1.35104	0.549839	5.28398	7.56431	9.57705	21.864	12.6685	19.8776	18.1217	6.78447	7.52241	12.4013	7.0179	1.74933	0.00129213	0.00323169	4.21695	12.8705
C16orf13	94.4004	95.9237	103.919	57.369	86.3593	77.8135	114.526	93.7467	94.4187	78.5273	45.7952	81.6719	74.4079	109.279	-0.0319204	0.895643	0.923504	87.5944	85.5762
C16orf45	183.099	188.245	127.013	198.527	204.236	590.186	410.211	592.884	283.256	415.591	444.383	106.388	204.145	239.611	0.920338	0.00148114	0.00366289	180.224	365.184
C16orf46	15.839	23.418	22.5434	15.0971	17.0197	15.5627	14.576	15.2022	13.6659	18.1217	10.1767	20.418	20.9868	37.0946	-0.0196025	0.93855	0.956085	18.7834	18.4227
C16orf47	0.63356	0.900692	3.29903	3.77427	2.52144	1.19713	1.04114	1.26685	0	2.41623	0	0	6.67763	0	-1.12524	0.220961	0.30251	2.2258	1.39989
C16orf52	849.603	892.135	735.134	667.292	653.052	489.627	398.758	225.499	269.59	217.46	295.125	568.479	689.704	370.946	-0.99413	5.74295e-10	4.28085e-09	759.443	391.688
C16orf54	4381.7	2172.02	3739.45	4347.21	5107.8	5782.14	7871.05	7900.06	6866.47	6493.61	12173	4186.76	6207.33	5948.17	0.814655	7.78899e-06	3.00074e-05	3949.64	7047.63
C16orf58	611.385	844.399	694.996	531.418	566.693	478.852	567.424	314.178	407.491	465.123	371.45	640.479	443.585	645.647	-0.422678	0.00256709	0.00601564	649.778	481.581
C16orf59	1.26712	1.35104	1.64952	1.50971	1.26072	1.19713	5.20572	6.33424	3.72705	13.2892	5.08835	0	1.90789	6.01534	1.62906	0.0280977	0.0510435	1.40762	4.75166
C16orf62	1180.32	1416.34	1430.68	1377.61	1423.35	829.612	887.055	1016.01	880.827	1052.27	719.154	838.211	1362.24	933.381	-0.54574	1.24678e-10	1.03361e-09	1365.66	946.528
C16orf70	1009.89	914.653	891.288	1277.21	1056.48	1674.79	978.676	1582.29	1116.87	1241.94	1626.58	911.286	1512.01	1223.12	0.340128	0.0142687	0.0280312	1029.91	1318.62
C16orf71	20.9075	16.6628	12.0964	12.8325	18.9108	13.1684	16.6583	21.5364	13.6659	7.24868	15.2651	13.9702	7.63158	20.0511	-0.179525	0.631462	0.707614	16.282	14.3551
C16orf72	8970.57	4041.4	5971.8	9147.33	6991.32	12452.6	8312.5	14775.2	16028.8	10816.2	17653.2	10111.2	7716.48	11163.5	0.76515	3.98204e-10	3.05086e-09	7024.48	12114.4
C16orf74	21.541	20.7159	21.9935	13.5874	28.9965	16.7598	27.0698	16.469	37.2705	27.7866	13.5689	24.7165	10.4934	5.01279	-0.119002	0.725378	0.786678	21.3669	19.9053
C16orf86	7.60272	14.4111	8.24758	6.79369	11.9768	9.57705	28.1109	24.0701	23.6047	22.9541	35.6185	11.8209	18.125	15.0384	1.00687	0.00841111	0.0174497	9.80638	20.9911
C16orf87	741.265	831.789	724.687	930.736	761.474	870.314	540.354	649.893	667.142	672.919	546.15	552.36	514.177	957.442	-0.265869	0.150997	0.219476	797.99	663.417
C16orf89	10.7705	4.95381	3.84887	1.50971	6.3036	2.39426	7.28801	0	6.21175	0	1.69612	5.37315	3.81579	5.01279	-0.6644	0.242743	0.32698	5.4773	3.53243
C16orf90	0	0.450346	0.549839	0	0.63036	2.39426	0	1.26685	3.72705	1.20811	1.69612	6.44778	1.90789	1.00256	2.5571	0.0181478	0.0346172	0.326109	2.1834
C16orf91	25.3424	36.9284	34.09	32.4588	50.4288	56.2652	80.1681	60.8087	73.2987	59.1975	67.8447	55.8808	24.8026	49.1253	0.672105	0.00938599	0.0192431	35.8497	58.5991
C16orf95	5.70204	8.55657	7.69774	4.52913	6.3036	9.57705	12.4937	32.938	11.1812	26.5785	6.78447	11.8209	5.72368	15.0384	1.11982	0.0150982	0.029502	6.55781	14.6818
C16orf96	10.137	8.10623	13.746	5.28398	6.3036	16.7598	15.6172	10.1348	6.21175	1.20811	49.1874	29.015	3.81579	17.0435	0.570685	0.164081	0.235643	8.71534	16.5548
C17orf100	103.27	173.834	80.2764	52.8398	37.8216	56.2652	43.7281	15.2022	24.847	14.4974	22.0495	60.1793	41.9737	62.1585	-1.22919	4.16962e-07	1.96803e-06	89.6083	37.8779
C17orf104	72.8594	97.2747	51.135	76.2403	60.5145	34.7168	36.4401	41.806	38.5129	71.2786	50.8835	66.6271	38.1579	71.1816	-0.516571	0.0231091	0.0429588	71.6048	49.956
C17orf105	0.63356	2.25173	2.74919	7.54855	8.19467	1.19713	5.20572	7.60108	13.6659	4.83245	5.08835	3.22389	15.2632	3.00767	0.521632	0.366169	0.458841	4.27554	6.56503
C17orf107	3.1678	3.15242	13.1961	4.52913	11.3465	7.18279	13.5349	7.60108	6.21175	6.04056	61.0603	19.3433	0	19.0486	0.54264	0.333115	0.424735	7.07839	15.5581
C17orf47	2.53424	6.30484	5.49839	5.28398	1.89108	0	5.20572	6.33424	12.4235	6.04056	0	0	4.76973	4.01023	-0.260217	0.725955	0.787034	4.30251	4.30933
C17orf50	7.60272	5.8545	8.24758	3.01942	6.93395	1.19713	3.12343	0	0	1.20811	0	5.37315	0.953947	4.01023	-2.19367	0.000255568	0.000733897	6.33163	1.76289
C17orf51	306.009	283.718	212.238	218.153	87.62	86.1934	153.048	167.224	81.9952	37.4515	94.9826	137.553	309.079	133.34	-0.787787	0.0166322	0.0321065	221.548	133.43
C17orf53	31.0444	38.7297	43.4372	38.4976	46.0162	329.211	111.402	73.4771	140.386	138.933	364.665	842.51	248.98	72.1841	2.50001	1.78351e-09	1.23045e-08	39.5451	257.972
C17orf58	60.8217	84.2147	81.9259	80.0146	76.2735	105.348	117.649	157.089	121.75	158.263	106.855	77.3733	104.934	80.2046	0.52315	0.000962446	0.00246923	76.6501	114.385
C17orf59	60.1882	67.5519	53.3343	68.6918	110.313	135.276	184.283	108.949	154.052	124.436	208.623	89.1943	123.059	72.1841	0.862204	0.000217603	0.000634177	72.0158	133.339
C17orf62	2190.85	1275.38	1508.21	2078.87	1525.47	3567.45	3421.2	5599.46	7555.98	4532.84	6295.99	3298.04	3536.28	3775.63	1.3652	5.73933e-20	1.81075e-18	1715.76	4620.32
C17orf67	209.075	190.947	163.302	162.294	136.788	135.276	102.032	72.2103	106.842	45.9083	86.502	121.433	83.9473	133.34	-0.806106	2.42194e-05	8.46989e-05	172.481	98.6101
C17orf75	551.83	584.099	487.707	401.583	434.948	307.663	332.125	236.9	212.442	276.658	257.81	435.225	475.066	298.762	-0.65183	3.43833e-07	1.64287e-06	492.033	314.739
C17orf77	10.7705	13.9607	18.6945	15.0971	13.2375	15.5627	5.20572	20.2696	8.69646	8.45679	6.78447	10.7463	14.3092	18.046	-0.26279	0.471848	0.564097	14.3521	12.0086
C17orf78	0.63356	2.70208	3.29903	3.01942	6.93395	0	1.04114	2.53369	3.72705	3.62434	0	2.14926	8.58552	8.02046	-0.214469	0.759273	0.814923	3.31761	3.29794
C17orf80	527.122	566.085	432.723	422.719	382.628	404.63	409.17	390.189	401.279	396.261	283.252	312.717	980.657	279.713	-0.192825	0.240215	0.324287	466.255	428.652
C17orf85	3634.1	3532.06	3213.26	3471.58	3610.07	3340	3549.26	3515.5	3832.65	3294.52	4559.17	3867.59	3680.33	2631.71	0.0288977	0.766333	0.820414	3492.21	3585.64
C17orf89	69.6916	90.9699	53.3343	86.0535	55.4716	47.8852	80.1681	70.9434	33.5435	76.1111	55.9719	48.3583	43.8816	44.1125	-0.35896	0.100369	0.154746	71.1042	55.664
C17orf96	16.4726	20.7159	26.9421	38.4976	19.5411	46.6881	19.7817	43.0728	48.4517	42.2839	20.3534	22.5672	25.7566	105.269	0.777213	0.0606155	0.100119	24.4339	41.5804
C17orf97	41.8149	19.8152	43.4372	45.2913	49.168	87.3906	41.6458	67.1429	57.1481	91.8166	35.6185	45.1345	69.6381	42.1074	0.566246	0.0396436	0.0693388	39.9053	59.738
C17orf99	2.53424	0	1.64952	0.754855	0.63036	0	1.04114	0	8.69646	0	0	1.07463	1.90789	2.00511	0.466763	0.710432	0.77405	1.11379	1.63614
C18orf21	738.097	737.216	814.311	726.17	758.953	511.175	640.304	787.979	642.295	787.689	508.835	608.24	505.592	840.143	-0.221872	0.12665	0.188901	754.949	648.028
C18orf25	5777.43	4210.28	5308.14	5157.17	5386.42	7820.86	6681.02	7853.18	13668.3	7820.11	9971.48	8780.8	5172.3	10820.6	0.742388	3.75465e-06	1.52801e-05	5167.89	8732.08
C18orf54	219.212	176.085	194.643	177.391	192.26	108.939	111.402	55.7413	75.7834	91.8166	76.3253	147.224	195.559	78.1995	-0.936594	9.86891e-06	3.73164e-05	191.918	104.555
C18orf61	8.23628	2.25173	10.9968	13.5874	5.67324	21.5484	10.4114	16.469	16.1506	4.83245	40.7068	12.8956	2.86184	24.0614	0.879227	0.0596083	0.0987389	8.14908	16.6597
C18orf65	5.06848	0.900692	7.69774	13.5874	10.0858	19.1541	18.7406	21.5364	13.6659	12.0811	11.8728	9.67167	22.8947	6.01534	1.03182	0.016867	0.0324772	7.46801	15.0703
C18orf8	2036.89	1953.6	2385.75	2404.21	2348.09	2267.37	2203.06	2538.76	2400.22	2373.94	2754.5	2647.89	1677.99	2979.6	0.113261	0.222988	0.304779	2225.71	2427.04
C19orf12	598.714	756.131	720.288	662.008	686.462	288.509	427.91	260.97	572.724	295.988	261.202	533.016	645.822	627.601	-0.67311	0.000205355	0.000601434	684.72	434.86
C19orf18	24.0753	26.1201	28.5916	8.3034	21.4322	50.2795	26.0286	39.2723	37.2705	18.1217	33.9224	33.3135	27.6645	27.069	0.571993	0.0606635	0.100181	21.7045	32.5491
C19orf24	0.63356	7.65588	6.59806	0	6.3036	7.18279	19.7817	19.0027	21.12	9.6649	16.9612	6.44778	3.81579	13.0332	1.53535	0.0119608	0.0239178	4.23822	13.0011
C19orf25	15.2054	28.3718	21.4437	16.6068	18.9108	29.9283	70.7978	63.3424	70.814	37.4515	49.1874	34.3882	41.9737	34.0869	1.22412	0.00267036	0.00623379	20.1077	47.9967
C19orf35	202.739	115.289	138.559	119.267	165.785	729.053	605.946	590.351	734.229	519.488	607.21	457.792	398.75	413.054	1.90247	1.29112e-29	1.34001e-27	148.328	561.764
C19orf38	1085.92	937.17	932.526	1181.35	1231.09	2334.41	2414.41	4336.42	4112.18	3081.9	4682.98	1796.78	1846.84	2267.78	1.35825	1.25137e-24	7.15883e-23	1073.61	2985.97
C19orf43	961.744	862.412	981.462	1041.7	1082.96	1398.25	1804.3	1901.54	1459.76	1268.52	1830.11	1157.38	974.934	992.532	0.491686	2.67206e-05	9.25088e-05	986.055	1420.81
C19orf44	49.4177	49.5381	43.9871	49.8204	36.5609	56.2652	63.5098	76.0108	73.2987	79.7354	71.237	101.015	38.1579	70.179	0.580919	0.00798426	0.0166808	45.8648	69.9343
C19orf45	19.0068	14.8614	16.4952	15.852	27.7358	113.727	33.3166	51.9407	75.7834	49.5326	128.905	307.344	4.76973	207.529	2.06629	1.68982e-06	7.31255e-06	18.7902	108.094
C19orf47	67.7909	72.956	67.6301	86.0535	71.861	82.602	107.238	108.949	106.842	94.2328	84.8059	70.9256	82.9934	105.269	0.348668	0.0968546	0.150095	73.2583	93.7619
C19orf48	139.383	201.755	216.636	138.138	251.513	140.064	133.266	102.615	113.054	152.222	81.4137	190.209	95.3947	199.509	-0.506789	0.00929931	0.0190958	189.485	134.194
C19orf52	155.856	157.171	186.395	172.107	144.983	105.348	141.596	116.55	115.539	125.644	62.7564	135.403	156.447	122.312	-0.444283	0.000771783	0.00202661	163.302	120.177
C19orf53	394.708	442.69	464.064	394.034	479.073	378.293	574.712	642.291	467.124	484.453	444.383	297.672	335.789	551.406	0.0736128	0.733201	0.793125	434.914	464.014
C19orf54	281.934	224.272	236.98	276.277	231.972	362.731	373.771	489.003	449.731	560.564	388.411	443.822	742.171	349.892	0.858836	6.02713e-08	3.26693e-07	250.287	462.233
C19orf57	15.839	9.00692	7.69774	8.3034	9.45539	2.39426	8.32916	8.86793	8.69646	2.41623	5.08835	9.67167	7.63158	8.02046	-0.559615	0.151892	0.22049	10.0605	6.79068
C19orf60	16.4726	20.2656	21.9935	9.81311	18.2804	28.7311	40.6046	32.938	27.3317	22.9541	25.4418	30.0896	23.8487	30.0767	0.749914	0.0159999	0.0310721	17.365	29.1129
C19orf66	590.478	534.11	610.871	578.219	583.083	1060.66	1199.4	1812.86	2083.42	1453.36	1333.15	938.152	653.454	2581.58	1.30807	1.30299e-07	6.69399e-07	579.352	1457.34
C19orf67	0.63356	0.450346	0	1.50971	1.26072	3.59139	2.08229	0	2.4847	0	1.69612	5.37315	2.86184	2.00511	1.58104	0.0743659	0.119384	0.770867	2.23273
C19orf68	568.303	577.794	522.896	585.767	554.716	520.752	454.98	568.814	556.573	416.799	342.616	432.001	572.368	582.486	-0.187535	0.140174	0.206046	561.895	494.154
C19orf70	43.7156	51.3394	43.4372	44.5364	37.1912	57.4623	92.6619	78.5445	80.7528	56.7813	55.9719	49.433	40.0658	120.307	0.677577	0.0159564	0.0310106	44.044	70.22
C19orf71	17.1061	28.3718	32.4405	15.0971	23.9537	45.491	62.4687	55.7413	77.0258	43.4921	66.1486	38.6867	15.2632	63.1611	1.09795	0.0071617	0.0151321	23.3938	51.942
C19orf84	114.674	84.665	83.0256	58.1238	149.395	10.7742	58.3041	10.1348	13.6659	14.4974	11.8728	49.433	25.7566	29.0742	-2.11758	1.96121e-08	1.15394e-07	97.9768	24.8348
C1D	2245.97	1519.02	1673.16	2064.53	1657.22	1315.65	1635.64	2054.83	2056.09	1820.63	2976.69	2042.87	1725.69	1887.82	0.0706794	0.570344	0.654811	1831.98	1946.21
C1GALT1	6810.77	6213.42	6405.62	6249.44	6721.52	5264.98	6239.58	10334.9	11334	10603.6	5966.94	6413.39	6739.64	10412.6	0.317718	0.105438	0.161408	6480.16	8145.51
C1GALT1C1	641.162	523.302	632.864	747.306	699.069	911.017	675.703	1052.75	1627.48	1072.8	1324.67	723.226	1247.76	835.13	0.655093	2.2978e-06	9.70066e-06	648.741	1052.28
C1orf100	16.4726	13.5104	15.9453	12.0777	13.2375	55.068	49.9749	38.0054	36.0282	33.8272	54.2758	11.8209	16.2171	28.0716	1.25278	1.40706e-05	5.14722e-05	14.2487	35.921
C1orf101	63.356	68.0022	65.4308	58.1238	56.102	34.7168	61.4275	39.2723	37.2705	51.9488	40.7068	34.3882	31.4802	45.1151	-0.565775	0.00642561	0.0137372	62.203	41.814
C1orf105	1.26712	5.40415	2.19935	1.50971	8.19467	5.98565	1.04114	10.1348	2.4847	1.20811	5.08835	5.37315	2.86184	7.0179	0.233816	0.777951	0.829719	3.715	4.57729
C1orf106	1.90068	0.900692	1.09968	6.03884	0	11.9713	17.6995	5.06739	16.1506	0	8.48059	2.14926	11.4474	5.01279	2.14786	0.00663007	0.0141213	1.98798	8.6643
C1orf109	321.215	323.799	335.951	293.639	285.553	215.484	174.912	140.62	115.539	164.303	103.463	224.598	276.645	195.499	-0.827131	1.39207e-11	1.32529e-10	312.031	179.007
C1orf111	0.63356	3.15242	2.19935	1.50971	0.63036	0	1.04114	0	4.9694	10.873	10.1767	3.22389	4.76973	1.00256	1.30571	0.165673	0.237518	1.62508	4.00627
C1orf112	523.32	483.672	549.289	422.719	486.007	536.315	472.68	608.087	649.75	623.386	395.196	377.195	522.763	438.118	0.0449418	0.761183	0.816281	493.001	513.721
C1orf115	64.6231	95.023	97.3214	22.6456	51.0591	164.007	74.9624	98.8141	130.447	114.771	76.3253	40.8359	109.704	45.1151	0.495029	0.133201	0.197323	66.1345	94.9979
C1orf116	50.6848	30.6235	40.6881	47.5559	56.7324	84.9963	51.0161	93.7467	63.3599	79.7354	66.1486	80.5972	48.6513	51.1304	0.623379	0.0105927	0.0214714	45.2569	68.8202
C1orf122	51.3183	63.4988	63.2314	85.2986	70.6003	172.387	142.637	239.434	185.11	140.141	208.623	92.4182	74.4079	96.2455	1.05727	2.37515e-10	1.88507e-09	66.7895	150.156
C1orf123	674.741	793.059	658.157	668.047	755.171	617.72	804.805	596.685	623.66	538.818	519.012	570.628	691.612	594.516	-0.200857	0.0504408	0.0855224	709.835	617.495
C1orf127	24.0753	25.2194	23.0932	24.1554	18.9108	31.1254	6.24687	20.2696	4.9694	25.3704	3.39224	9.67167	43.8816	13.0332	-0.567082	0.160563	0.231484	23.0908	17.5511
C1orf131	296.506	277.863	277.668	249.857	314.549	159.218	300.891	324.313	263.378	357.601	189.965	207.404	662.039	329.841	0.0305931	0.864896	0.899734	283.289	310.517
C1orf145	81.0956	59.4457	69.8295	28.6845	39.7126	21.5484	26.0286	10.1348	17.3929	14.4974	15.2651	33.3135	13.3553	71.1816	-1.23541	0.000180895	0.000536248	55.7536	24.7464
C1orf146	22.8081	27.4711	13.746	18.8714	16.3893	22.7455	22.9052	5.06739	7.45411	9.6649	5.08835	37.612	10.4934	16.0409	-0.523097	0.0684358	0.111256	19.8572	15.2302
C1orf159	6.3356	7.20553	14.2958	8.3034	12.6072	8.37992	18.7406	13.9353	6.21175	16.9136	6.78447	9.67167	6.67763	15.0384	0.225742	0.630689	0.706915	9.74951	11.3726
C1orf162	4159.95	4332.78	5279	4732.19	4911.76	12589	6621.68	9574.83	12278.2	9848.53	13865.8	9827.49	17701.4	5325.58	1.19422	1.10753e-07	5.73638e-07	4683.14	10848.1
C1orf167	0	0.900692	1.09968	0	3.1518	7.18279	0	3.80054	3.72705	3.62434	1.69612	3.22389	0	1.00256	1.16218	0.250522	0.336005	1.03043	2.69525
C1orf174	817.292	1272.68	1252.53	1124.73	1461.8	1025.94	1173.37	904.529	785.166	1048.64	1048.2	931.704	1016.91	705.8	-0.303533	0.0467132	0.080031	1185.81	960.029
C1orf177	63.356	95.9237	81.9259	84.5438	88.2503	29.9283	60.3864	11.4016	9.93881	19.3298	47.4913	72.0002	49.6052	18.046	-1.31736	0.000280631	0.000801026	82.7999	35.3475
C1orf186	110.239	70.254	109.968	100.396	74.3824	61.0537	41.6458	8.86793	125.477	88.1922	6.78447	106.388	98.2565	45.1151	-0.600684	0.178094	0.252147	93.0478	64.6424
C1orf189	15.2054	10.8083	15.9453	10.568	6.93395	14.3656	17.6995	12.6685	18.6353	12.0811	25.4418	15.0448	7.63158	16.0409	0.326358	0.235362	0.318528	11.8922	15.5121
C1orf194	12.6712	7.20553	1.64952	9.81311	13.2375	25.1397	54.1395	17.7359	26.0894	18.1217	79.7176	31.1643	6.67763	46.1176	1.8111	1.15339e-05	4.29451e-05	8.91538	33.8781
C1orf195	0	0.900692	6.04822	3.01942	0	0	1.04114	0	3.72705	4.83245	0	0	0.953947	1.00256	-0.843157	0.540508	0.627268	1.99367	1.28413
C1orf198	164.092	172.032	142.958	153.99	233.233	193.935	324.837	162.156	72.0564	124.436	261.202	73.0748	153.585	205.524	0.00908693	0.979058	0.985077	173.261	174.534
C1orf204	57.6539	40.5311	46.7363	48.3107	34.6698	185.555	84.3327	119.084	55.9058	45.9083	103.463	89.1943	41.9737	74.1892	0.925079	0.000964943	0.00247397	45.5804	88.8451
C1orf21	1268.39	2823.67	2748.64	2473.66	3800.44	450.121	944.318	144.421	135.416	317.734	527.493	1571.11	645.822	326.834	-2.46309	1.89292e-11	1.76064e-10	2622.96	562.585
C1orf216	337.054	394.503	355.196	489.146	361.826	520.752	471.638	410.458	283.256	345.52	305.301	323.464	542.796	272.696	-0.0182222	0.913507	0.937172	387.545	386.209
C1orf220	77.9278	59.896	85.7748	52.8398	34.0394	68.2365	27.0698	11.4016	49.694	32.619	13.5689	50.5076	87.7631	29.0742	-0.663205	0.0790993	0.126045	62.0956	41.1039
C1orf226	16.4726	7.65588	10.4469	24.9102	20.1715	33.5197	18.7406	60.8087	90.6916	91.8166	122.121	63.4032	106.842	18.046	2.0664	7.00511e-05	0.000224592	15.9314	67.3321
C1orf228	171.061	139.607	139.659	101.905	117.247	209.498	439.363	404.124	708.14	306.861	369.754	127.881	225.131	234.598	1.19277	3.34532e-06	1.37617e-05	133.896	336.15
C1orf233	1.26712	4.05311	0	1.50971	3.1518	3.59139	13.5349	5.06739	4.9694	1.20811	10.1767	0	0.953947	5.01279	1.18969	0.159257	0.22981	1.99635	4.94607
C1orf234	3.1678	2.70208	2.19935	3.01942	1.89108	0	7.28801	1.26685	1.24235	0	0	1.07463	0	2.00511	-0.882111	0.350248	0.442157	2.59595	1.43077
C1orf27	1735.32	1465.43	1928.83	2019.24	1673.6	1432.97	1294.14	1725.45	1488.34	1598.33	1704.6	1589.38	1510.1	1855.73	-0.161151	0.102097	0.156913	1764.48	1577.67
C1orf35	57.6539	77.9098	81.9259	50.5753	65.5574	87.3906	74.9624	73.4771	69.5717	88.1922	71.237	73.0748	61.0526	61.156	0.128031	0.545525	0.632279	66.7245	73.346
C1orf43	2403.09	2155.81	2455.03	2726.54	2595.19	2834.81	3037.02	4560.65	3533.25	3936.03	2829.13	2046.1	3716.58	2316.91	0.326655	0.00010549	0.00032754	2467.13	3201.16
C1orf50	240.753	237.332	222.685	196.262	216.844	198.724	205.105	211.563	141.628	194.506	133.993	210.627	162.171	171.437	-0.293734	0.0227871	0.0424434	222.775	181.084
C1orf52	1566.79	1241.6	1455.97	1368.55	1521.69	1279.73	1488.84	1551.89	1449.82	1425.57	1965.8	1628.06	932.96	1605.09	0.0258917	0.78781	0.837931	1430.92	1480.86
C1orf54	98.2017	109.884	174.299	92.0923	122.92	55.068	66.6332	59.5418	52.1787	74.903	42.403	69.8509	114.474	109.279	-0.754508	0.00089611	0.00231657	119.479	71.5923
C1orf56	57.0204	30.6235	41.7877	34.7233	25.2144	140.064	94.7441	83.6119	84.4799	77.3192	123.817	56.9554	45.7895	55.1406	1.10842	6.78924e-07	3.11318e-06	37.8739	84.6579
C1orf61	5.70204	13.5104	14.8456	14.3422	25.2144	4.78852	10.4114	13.9353	3.72705	6.04056	10.1767	11.8209	0.953947	9.02302	-0.992436	0.0236665	0.0438493	14.7229	7.87528
C1orf74	436.523	386.397	252.376	349.498	327.157	511.175	360.236	190.027	233.562	262.16	274.771	350.329	713.552	134.343	-0.105467	0.692175	0.759383	350.39	336.684
C1orf87	1.26712	0.900692	4.39871	1.50971	100.227	1.19713	1.04114	0	0	0	0	1.07463	39.1118	0	-5.19577	0.00153303	0.00377456	21.6607	4.71386
C1orf95	14.5719	14.8614	11.5466	4.52913	5.04288	10.7742	5.20572	3.80054	39.7552	2.41623	11.8728	63.4032	0	30.0767	0.480173	0.471845	0.564097	10.1104	18.5894
C1QA	65.2566	153.568	146.807	92.8472	100.858	71.8279	234.257	211.563	398.795	159.471	42.403	204.18	548.519	409.043	1.09743	0.0205613	0.0387345	111.867	253.34
C1QB	15.2054	44.1339	49.4855	40.7622	42.8644	43.0967	94.7441	160.89	475.82	89.4003	39.0107	96.7167	313.849	173.442	1.9873	0.00012569	0.000384726	38.4903	165.219
C1QBP	532.19	589.503	600.974	591.806	546.522	337.591	456.021	418.06	315.557	594.391	274.771	262.21	448.355	470.199	-0.535974	0.000422341	0.00116575	572.199	397.462
C1QC	0.63356	4.05311	9.89709	4.52913	3.1518	7.18279	27.0698	51.9407	196.291	42.2839	10.1767	26.8657	61.0526	60.1534	3.42762	1.17995e-08	7.18985e-08	4.45294	53.6686
C1QL3	186.267	132.852	73.1285	120.022	73.1217	55.068	55.1807	41.806	38.5129	22.9541	40.7068	110.687	52.4671	53.1355	-1.20276	3.84723e-07	1.82448e-06	117.078	52.2798
C1QTNF3	151.421	148.164	107.768	93.602	108.422	77.8135	102.032	36.7386	53.4211	53.157	39.0107	117.135	66.7763	102.261	-0.79235	8.7468e-08	4.61723e-07	121.875	72.0383
C1QTNF3-AMACR	10.137	8.55657	10.4469	14.3422	13.2375	2.39426	10.4114	1.26685	2.4847	0	5.08835	11.8209	3.81579	7.0179	-1.33926	0.00267021	0.00623379	11.3441	4.92225
C1QTNF6	111.506	172.032	124.813	113.983	76.9039	179.57	219.681	136.819	190.08	106.314	212.015	220.299	126.875	184.471	0.540319	0.0222506	0.0415489	119.848	175.125
C1QTNF7	10.7705	9.45726	14.2958	21.1359	7.56431	49.0824	10.4114	25.3369	62.1175	44.7002	39.0107	46.2091	13.3553	99.2532	1.73634	5.33775e-05	0.000174823	12.6448	43.2752
C1QTNF9	3.1678	4.95381	0	0.754855	3.1518	5.98565	11.4526	1.26685	8.69646	2.41623	8.48059	13.9702	2.86184	10.0256	1.50268	0.0476928	0.0814887	2.40565	7.23955
C1QTNF9B-AS1	2.53424	4.50346	0.549839	2.26456	0	0	5.20572	0	0	2.41623	0	1.07463	2.86184	1.00256	-0.567135	0.560808	0.646403	1.97042	1.39566
C1R	175.496	137.356	128.112	139.648	124.181	409.419	241.546	511.806	368.978	321.358	512.228	292.299	147.862	345.882	1.21094	3.98408e-11	3.53597e-10	140.959	350.153
C1RL	4688.97	2187.78	2580.94	3807.49	3584.85	10993.3	5979.29	9940.95	11388.6	10163.9	14322	6582.11	8841.18	5985.27	1.44111	1.02307e-21	4.17876e-20	3370.01	9355.17
C1RL-AS1	1319.07	824.133	1394.39	1702.2	982.73	438.15	1504.45	997.009	1528.09	3739.11	3281.99	3051.95	3178.55	3250.29	0.893927	0.026892	0.0491352	1244.5	2329.95
C1S	43.0821	53.1408	38.4887	56.6141	46.6466	69.4336	55.1807	74.744	53.4211	48.3245	28.834	79.5226	59.1447	96.2455	0.407967	0.0729358	0.117655	47.5945	62.7612
C2	161.558	178.337	323.305	196.262	248.992	213.089	263.41	472.534	772.742	744.197	72.9331	150.448	1665.59	921.35	1.01538	0.00745692	0.0156843	221.691	586.255
C2-AS1	0.63356	5.8545	2.19935	2.26456	0.63036	4.78852	7.28801	8.86793	12.4235	15.7055	6.78447	4.29852	29.5724	10.0256	2.24202	0.000681716	0.00181215	2.31647	11.0838
C20orf173	5.06848	9.90761	9.34726	8.3034	3.78216	2.39426	6.24687	2.53369	0	2.41623	5.08835	7.52241	3.81579	5.01279	-0.920992	0.0466487	0.0799421	7.28178	3.89227
C20orf194	763.439	885.83	876.443	1057.55	904.566	840.386	592.411	853.855	689.505	614.929	535.973	636.181	996.875	606.547	-0.358173	0.016666	0.0321651	897.566	707.407
C20orf195	19.6403	6.30484	8.24758	9.81311	8.82503	14.3656	9.3703	3.80054	11.1812	0	5.08835	8.59704	0.953947	26.0665	-0.305266	0.561113	0.646715	10.5662	8.82482
C20orf196	235.051	195	204.54	192.488	184.695	191.541	173.871	183.693	172.687	166.72	215.407	175.165	262.335	229.586	-0.0394021	0.76727	0.821278	202.355	196.778
C20orf197	408.646	460.704	313.958	395.544	347.958	1441.35	706.937	837.386	657.204	1170.66	1972.59	642.629	1160	461.176	1.33465	3.67168e-06	1.49713e-05	385.362	1005.55
C20orf202	5.06848	8.55657	15.3955	4.52913	8.19467	13.1684	6.24687	7.60108	2.4847	6.04056	0	4.29852	10.4934	9.02302	-0.38672	0.399823	0.493491	8.34887	6.59518
C20orf203	5.70204	12.1593	3.29903	6.03884	7.56431	7.18279	6.24687	6.33424	1.24235	1.20811	0	16.1194	8.58552	4.01023	-0.37318	0.511287	0.600586	6.95271	5.65884
C20orf24	79.195	73.4064	75.8777	141.158	118.508	383.082	143.678	239.434	237.289	186.049	305.301	295.523	128.783	262.67	1.28175	1.61951e-10	1.32015e-09	97.6289	242.423
C20orf27	65.2566	153.118	118.765	143.422	86.3593	136.473	181.159	192.561	226.108	146.182	122.121	67.7017	155.493	71.1816	0.264545	0.208356	0.287699	113.384	144.331
C20orf62	0.63356	1.35104	0	0.754855	4.41252	2.39426	6.24687	3.80054	9.93881	7.24868	5.08835	2.14926	0	3.00767	1.5353	0.0618931	0.101919	1.43039	4.43049
C20orf96	159.657	202.205	175.948	147.952	122.29	165.204	125.978	328.113	114.296	130.476	105.159	220.299	248.026	149.381	0.125697	0.605002	0.684547	161.61	176.326
C21orf140	50.6848	35.5773	40.6881	45.2913	33.4091	26.3369	26.0286	13.9353	7.45411	16.9136	18.6573	37.612	35.296	23.0588	-0.888368	7.76439e-05	0.000246769	41.1301	22.8103
C21orf2	289.537	344.515	327.704	276.277	307.615	210.695	206.147	186.227	186.353	165.511	145.866	338.508	157.401	367.939	-0.518632	0.000480624	0.00131307	309.129	218.294
C21orf33	618.354	739.918	693.346	725.416	665.66	621.311	705.896	624.556	491.971	552.107	410.461	557.733	745.987	530.353	-0.24803	0.00771967	0.0161885	688.539	582.264
C21orf58	82.3628	89.1685	73.6784	70.2015	57.3627	77.8135	123.896	72.2103	108.085	95.4409	54.2758	91.3435	97.3026	91.2327	0.282361	0.127923	0.190452	74.5548	90.1778
C21orf59	418.149	464.307	368.392	380.447	384.519	283.72	371.689	238.167	213.684	288.739	206.926	221.374	365.362	255.652	-0.579471	4.25176e-09	2.77123e-08	403.163	271.701
C21orf62	45.6163	36.9284	21.9935	13.5874	16.3893	14.3656	15.6172	3.80054	6.21175	3.62434	1.69612	16.1194	18.125	20.0511	-1.49034	9.74933e-05	0.000304189	26.903	11.0679
C21orf62-AS1	89.9655	99.9768	81.3761	76.9952	54.8413	51.4766	38.5223	13.9353	16.1506	25.3704	22.0495	44.0598	74.4079	40.1023	-1.25879	5.23602e-07	2.43984e-06	80.631	36.2305
C21orf91	2353.67	2251.28	1940.38	2118.88	2025.98	2138.08	2157.25	3613.05	3448.77	2300.25	2070.96	1276.66	2220.79	2512.41	0.117216	0.392454	0.485816	2138.04	2415.36
C21orf91-OT1	31.0444	11.2586	8.79742	23.4005	17.0197	39.5053	34.3578	55.7413	40.9976	24.1623	39.0107	29.015	29.5724	11.0281	0.851777	0.0123758	0.0246826	18.3041	33.71
C22orf15	12.6712	9.45726	10.9968	6.79369	6.3036	7.18279	7.28801	2.53369	9.93881	2.41623	5.08835	5.37315	10.4934	17.0435	-0.306886	0.489729	0.580864	9.2445	7.48421
C22orf23	330.718	341.813	350.797	211.359	255.926	207.104	283.191	207.763	303.134	192.09	189.965	343.882	317.664	445.135	-0.0973795	0.568928	0.653502	298.123	276.659
C22orf24	20.9075	9.45726	10.4469	9.81311	13.2375	33.5197	21.864	7.60108	18.6353	9.6649	16.9612	11.8209	9.53947	24.0614	0.424762	0.201905	0.280151	12.7725	17.0742
C22orf29	1142.31	1153.79	901.185	762.403	760.844	434.559	538.272	473.801	408.733	442.169	312.086	512.598	559.967	563.437	-0.995828	2.33861e-12	2.49115e-11	944.105	471.736
C22orf34	122.911	163.476	210.038	261.18	208.649	137.67	91.6207	136.819	122.993	112.354	91.5904	221.374	354.868	130.332	-0.383118	0.201169	0.279328	193.251	155.514
C22orf39	715.289	668.313	636.163	675.595	632.881	796.092	832.916	699.3	683.293	582.31	824.313	665.196	596.217	489.248	0.0324733	0.774077	0.826866	665.648	685.432
C22orf42	0	0.900692	1.09968	0.754855	0	1.19713	2.08229	1.26685	0	1.20811	1.69612	0	7.63158	1.00256	1.40497	0.194027	0.270632	0.551045	1.78718
C22orf46	1400.8	1436.6	1259.68	1256.83	1320.6	866.723	913.084	739.839	916.855	1150.12	627.564	828.54	1139.01	1307.33	-0.506515	8.41149e-05	0.00026569	1334.9	943.23
C2CD2	500.512	551.674	516.298	443.855	434.318	337.591	387.306	445.93	477.063	364.85	147.562	418.031	371.085	418.066	-0.381332	0.0370906	0.0654229	489.331	374.165
C2CD2L	798.919	826.385	730.735	764.668	891.959	1895.06	1011.99	1183.24	716.836	914.541	1275.48	844.659	958.717	737.882	0.393691	0.0702559	0.113874	802.533	1059.82
C2CD3	2088.85	1851.37	1902.44	1985.27	2088.38	2212.3	1929.24	2358.87	3467.4	2547.91	2026.86	2442.63	2093.91	2867.31	0.299395	0.0271663	0.0495505	1983.26	2438.49
C2CD4D	14.5719	9.45726	9.34726	23.4005	17.6501	4.78852	5.20572	0	0	1.20811	6.78447	16.1194	4.76973	9.02302	-1.83306	0.000462738	0.00126913	14.8854	5.32211
C2CD5	3949.61	3597.81	3602.54	3147.75	3397.01	4351.57	3467.01	3045.5	3215.2	3566.35	4160.58	3389.38	6443.91	2330.95	0.0808038	0.643415	0.717959	3538.94	3774.49
C2orf15	39.2807	40.5311	33.5402	56.6141	36.5609	14.3656	31.2343	20.2696	13.6659	6.04056	20.3534	20.418	23.8487	7.0179	-1.23701	0.00018047	0.000535239	41.3054	17.4682
C2orf16	16.4726	35.127	18.6945	43.0267	29.6269	22.7455	27.0698	21.5364	24.847	22.9541	15.2651	17.1941	22.8947	7.0179	-0.507219	0.0762698	0.122059	28.5895	20.1694
C2orf27A	51.9519	50.4387	40.6881	5.28398	28.3662	22.7455	15.6172	12.6685	6.21175	22.9541	13.5689	29.015	16.2171	22.0563	-0.964535	0.00733118	0.0154524	35.3458	17.8949
C2orf40	3.1678	10.358	4.39871	0.754855	1.89108	3.59139	6.24687	0	1.24235	0	6.78447	6.44778	1.90789	1.00256	-0.55688	0.442781	0.535994	4.11408	3.02481
C2orf42	283.201	304.434	234.781	203.056	285.553	395.053	329.002	335.714	321.769	334.647	237.457	269.732	437.862	387.99	0.364396	0.00191131	0.00460153	262.205	338.803
C2orf44	226.814	316.143	213.887	229.476	281.771	111.333	124.937	54.4744	70.814	90.6084	55.9719	144	293.816	68.1739	-1.30503	9.49526e-11	8.0117e-10	253.618	112.681
C2orf47	193.869	244.087	294.164	261.18	244.579	102.953	164.501	183.693	181.383	260.952	145.866	190.209	244.21	275.703	-0.346552	0.0848742	0.133809	247.576	194.386
C2orf48	11.4041	22.5173	16.4952	14.3422	22.0626	16.7598	93.703	16.469	34.7858	59.1975	44.0991	36.5374	72.5	26.0665	1.34463	0.000718397	0.00189885	17.3643	44.4576
C2orf49	2510.8	2334.59	2585.34	2610.29	2732.61	1237.83	1564.84	1436.6	1520.64	1708.27	1967.5	2050.39	1395.62	1494.81	-0.684608	1.87513e-14	2.68991e-13	2554.73	1597.39
C2orf50	1.26712	5.40415	8.79742	0	3.78216	1.19713	2.08229	2.53369	2.4847	0	3.39224	2.14926	1.90789	11.0281	-0.327638	0.675896	0.745845	3.85017	2.97504
C2orf61	24.7088	7.20553	13.746	15.0971	24.584	57.4623	47.8926	15.2022	42.2399	55.5732	72.9331	72.0002	51.5131	27.069	1.52357	3.13561e-06	1.29608e-05	17.0683	49.0984
C2orf66	7.60272	4.95381	3.84887	12.0777	8.82503	46.6881	23.9463	53.2076	19.8776	20.5379	22.0495	16.1194	7.63158	73.1867	2.11164	1.76319e-05	6.32689e-05	7.46162	31.4716
C2orf68	3288.17	2715.14	2631.53	2760.5	2854.27	4221.08	3285.85	3140.51	3580.46	3307.81	3743.33	2960.61	3521.97	2235.7	0.218769	0.0503915	0.0854542	2849.92	3333.04
C2orf69	2013.45	1700.96	2058.6	2165.68	1991.31	1407.83	1555.47	1754.58	1633.69	1763.84	2408.49	2256.72	1610.26	1653.22	-0.160526	0.164177	0.235746	1986	1782.68
C2orf71	0	0	1.64952	3.01942	3.1518	0	0	1.26685	1.24235	1.20811	0	3.22389	1.90789	5.01279	-0.0999724	0.921673	0.943439	1.56415	1.54021
C2orf74	395.341	362.979	322.755	469.52	404.06	256.186	244.669	174.825	171.444	256.12	154.347	120.359	322.434	277.708	-0.862354	5.19694e-07	2.42281e-06	390.931	219.788
C2orf76	271.164	190.947	214.437	220.418	214.322	384.279	346.701	342.049	344.131	221.085	369.754	219.224	304.309	231.591	0.448117	0.00442674	0.00984278	222.257	307.014
C2orf81	4.43492	17.1131	12.0964	7.54855	9.45539	15.5627	5.20572	6.33424	4.9694	3.62434	3.39224	8.59704	0.953947	6.01534	-0.684406	0.15655	0.226472	10.1297	6.07277
C2orf88	2178.81	2821.42	2499.02	2241.16	4097.97	2831.21	2792.35	1672.24	468.366	2573.28	2143.89	715.703	1677.04	1511.86	-0.58076	0.108583	0.165515	2767.68	1820.66
C2orf91	9.50339	2.25173	3.84887	5.28398	2.52144	2.39426	1.04114	0	2.4847	0	0	0	0	0	-2.84485	0.00397206	0.00892847	4.68188	0.65779
C3	153.955	231.478	260.623	144.932	199.194	208.301	129.102	252.103	403.764	202.963	281.556	42.9852	112.566	289.739	-0.0460386	0.886875	0.916831	198.036	213.675
C3AR1	1040.3	1174.5	1308.07	1871.29	378.846	7592.2	1718.93	12169.3	26202.4	6445.28	10076.6	2981.02	11244.2	4337.06	2.75002	4.79424e-08	2.63323e-07	1154.6	9196.34
C3orf14	85.5306	86.9168	92.9227	98.1311	98.3361	33.5197	48.9338	106.415	24.847	36.2434	30.5301	18.2687	38.1579	85.2174	-1.01163	0.00242954	0.00571871	92.3675	46.9037
C3orf17	3238.12	3595.11	3626.19	3545.55	3437.98	1834	1854.28	1774.85	1566.6	1783.17	1468.84	2824.13	2250.36	1831.67	-0.873161	5.71299e-20	1.80544e-18	3488.59	1909.77
C3orf18	382.036	418.822	287.566	349.498	344.176	197.527	265.492	152.022	177.656	108.73	157.739	160.12	162.171	316.808	-0.914906	0.000121588	0.00037332	356.42	188.696
C3orf20	146.986	87.3671	117.665	136.629	73.7521	160.416	41.6458	234.367	248.47	177.593	227.28	82.7465	204.145	97.2481	0.405806	0.107201	0.163711	112.48	163.768
C3orf22	1.90068	3.15242	0	9.81311	3.1518	16.7598	5.20572	24.0701	54.6634	39.8677	27.1379	8.59704	37.2039	16.0409	2.72942	5.60317e-09	3.57718e-08	3.6036	25.5052
C3orf33	56.3868	83.314	75.3279	49.8204	91.4021	61.0537	43.7281	21.5364	29.8164	19.3298	49.1874	42.9852	48.6513	64.1637	-0.764392	0.00117859	0.00297434	71.2502	42.2724
C3orf35	124.178	122.044	112.717	114.738	129.224	141.261	98.9087	103.881	137.901	112.354	135.689	181.612	81.0855	237.606	0.157052	0.328539	0.420028	120.58	136.7
C3orf38	1796.14	1874.34	1976.67	1758.06	1841.28	1110.94	1258.74	1738.11	1739.29	1609.21	873.501	1299.23	1392.76	2267.78	-0.324924	0.0538629	0.0905438	1849.3	1476.62
C3orf49	29.7773	46.3856	43.4372	43.7816	30.2573	26.3369	32.2755	21.5364	47.2093	56.7813	33.9224	31.1643	57.2368	58.1483	0.0789733	0.765233	0.819684	38.7278	40.5124
C3orf52	56.3868	44.5842	36.8392	43.7816	32.1483	33.5197	30.1932	11.4016	4.9694	56.7813	8.48059	19.3433	28.6184	34.0869	-0.80643	0.016716	0.0322452	42.748	25.2661
C3orf58	1562.36	1449.21	1857.35	2014.71	1434.07	1862.74	1450.31	2490.62	1816.32	1806.13	1251.74	1397.02	2010.92	2017.15	0.0856942	0.565902	0.65101	1663.54	1789.22
C3orf62	2583.66	1156.94	1586.28	1911.29	2049.3	6651.26	7424.4	5178.87	4886.17	4306.92	9930.77	4369.44	3002.07	3210.19	1.52017	2.73367e-15	4.4682e-14	1857.49	5440.01
C3orf67	1.90068	5.8545	2.74919	15.852	3.1518	5.98565	0	3.80054	0	1.20811	5.08835	0	1.90789	10.0256	-0.921634	0.212202	0.292118	5.90162	3.1129
C3orf70	16.4726	8.10623	7.69774	12.8325	4.41252	10.7742	5.20572	11.4016	6.21175	10.873	10.1767	8.59704	5.72368	13.0332	-0.097534	0.835571	0.876602	9.90431	9.11077
C3orf80	6.3356	0.450346	0	0	5.04288	1.19713	2.08229	2.53369	3.72705	0	1.69612	0	4.76973	0	-0.610338	0.573186	0.657161	2.36576	1.77845
C3orf84	0	0	0	0	0	0	4.16458	0	3.72705	1.20811	1.69612	2.14926	1.90789	0	3.97901	0.0046142	0.0102106	0	1.65033
C4BPA	69.6916	19.3649	24.1929	55.1044	54.8413	4177.99	147.843	519.407	9092.77	381.764	659.79	155.821	62.0066	32.0818	4.60902	3.2881e-06	1.35439e-05	44.639	1692.16
C4BPB	5.70204	10.358	17.045	3.01942	13.8679	3.59139	8.32916	7.60108	9.93881	1.20811	5.08835	13.9702	2.86184	12.0307	-0.500277	0.315462	0.406456	9.99846	7.17996
C4orf17	1.26712	0	0	0.754855	2.52144	2.39426	2.08229	0	3.72705	1.20811	1.69612	0	1.90789	3.00767	1.00541	0.403776	0.497401	0.908682	1.78038
C4orf19	76.6607	32.8753	68.18	95.1117	95.8146	180.767	237.381	116.55	77.0258	170.344	447.775	173.015	70.5921	73.1867	1.13353	0.000690661	0.00183406	73.7285	171.849
C4orf22	0	1.35104	0.549839	1.50971	0	2.39426	0	1.26685	2.4847	0	3.39224	0	3.81579	6.01534	1.74448	0.150373	0.218688	0.682117	2.15213
C4orf26	3.80136	17.1131	1.64952	6.79369	3.1518	21.5484	1.04114	7.60108	9.93881	2.41623	8.48059	3.22389	3.81579	3.00767	0.0113228	0.986227	0.990552	6.5019	6.78595
C4orf27	253.424	304.884	226.533	254.386	234.494	202.315	219.681	258.437	253.44	218.668	154.347	163.344	313.849	192.491	-0.243335	0.0387233	0.0679105	254.744	219.619
C4orf29	1073.88	1093.89	1007.85	1002.45	1089.89	1007.98	772.529	1113.56	1067.18	991.86	966.787	1039.17	1078.91	1089.78	-0.0558891	0.507503	0.596879	1053.59	1014.2
C4orf3	6298.85	4815.1	5909.66	6287.94	6732.87	11184.8	11694.1	13106.8	21257.9	10562.5	15504.2	11145	11473.1	10664.2	1.0847	3.35116e-18	8.43026e-17	6008.88	12954.7
C4orf32	694.381	616.974	736.784	643.136	653.683	706.307	638.222	1204.77	1269.68	683.792	647.917	416.956	813.717	991.529	0.231523	0.150082	0.218362	668.992	819.21
C4orf33	1050.44	1098.39	1108.47	1521.03	1380.49	1108.54	1119.23	1301.05	1252.29	1211.74	1253.43	887.644	1222.01	1263.22	-0.0701182	0.536657	0.623828	1231.77	1179.91
C4orf36	0.63356	5.8545	1.64952	8.3034	4.41252	2.39426	3.12343	16.469	7.45411	1.20811	5.08835	5.37315	3.81579	12.0307	0.606614	0.393435	0.486605	4.1707	6.32854
C4orf45	2.53424	2.70208	4.94855	13.5874	6.3036	14.3656	15.6172	11.4016	8.69646	25.3704	8.48059	12.8956	4.76973	21.0537	1.2313	0.00936369	0.0192057	6.01517	13.6279
C4orf46	570.837	527.805	651.009	564.631	629.729	620.114	743.377	601.752	596.328	848.095	753.076	456.718	489.375	786.005	0.151099	0.317534	0.408848	588.802	654.982
C4orf47	1.90068	3.15242	0.549839	0	0.63036	2.39426	5.20572	3.80054	1.24235	3.62434	0	3.22389	3.81579	5.01279	1.34938	0.062622	0.102923	1.24666	3.14663
C5	378.869	385.496	350.797	354.782	346.067	519.555	534.107	513.073	725.533	747.822	357.881	574.927	784.144	535.366	0.685728	2.70445e-07	1.3191e-06	363.202	588.045
C5AR1	12714.3	4156.24	13429.3	18632.1	18784.1	22624.6	22845.8	20278.4	23605.9	17807.6	43086.5	19490.6	18361.6	14734.6	0.752137	0.00189003	0.0045555	13543.2	22537.3
C5AR2	1267.12	449.445	765.375	1235.7	1136.54	1757.39	1414.92	1831.86	1678.42	1572.96	2595.06	1388.42	1153.32	739.887	0.687413	0.000511182	0.00138976	970.835	1570.25
C5orf15	1498.37	1485.69	1709.45	1582.93	1754.92	1365.93	1587.75	1866.07	1569.09	1356.71	1200.85	1155.23	2028.09	1392.55	-0.120595	0.100587	0.155031	1606.27	1502.47
C5orf17	1.26712	4.05311	14.2958	5.28398	2.52144	0	0	0	0	6.04056	5.08835	0	4.76973	0	-1.93403	0.08962	0.140268	5.48429	1.76652
C5orf22	667.772	744.422	818.71	711.828	758.953	624.902	583.041	520.674	752.865	664.462	415.549	573.852	1104.67	489.248	-0.251713	0.097067	0.150338	740.337	636.585
C5orf24	3006.87	3585.65	2848.16	2774.09	2838.51	2015.97	2062.51	1407.47	1424.98	1449.74	1348.41	2256.72	2296.15	1639.18	-0.770161	1.43186e-14	2.10817e-13	3010.66	1766.79
C5orf28	516.351	593.556	466.263	483.107	460.793	271.749	292.562	140.62	157.779	159.471	188.269	355.702	422.598	277.708	-1.05155	5.19369e-15	8.13222e-14	504.014	251.829
C5orf30	291.437	246.339	200.141	246.838	266.642	3685.97	1862.61	1059.08	4110.94	2721.88	3212.45	4136.25	4702	235.601	3.55854	3.19073e-08	1.81496e-07	250.28	2858.53
C5orf34	162.825	158.972	158.354	143.422	134.267	81.4049	72.8801	34.2049	45.967	74.903	50.8835	81.6719	101.118	61.156	-1.19664	2.6117e-14	3.66352e-13	151.568	67.1322
C5orf42	602.515	744.422	750.53	587.277	745.085	205.907	297.767	112.749	212.442	138.933	140.778	423.404	452.171	284.726	-1.53459	4.8757e-17	1.04713e-15	685.966	252.097
C5orf45	387.738	407.113	354.646	263.444	281.14	274.143	203.023	116.55	247.228	126.852	128.905	390.091	149.77	343.877	-0.651859	0.000490162	0.00133759	338.816	220.049
C5orf47	6.96916	5.8545	12.6463	13.5874	6.3036	110.136	21.864	98.8141	55.9058	107.522	47.4913	36.5374	33.3881	94.2404	2.88455	1.73625e-09	1.19945e-08	9.07218	67.3221
C5orf51	1266.49	1232.15	1074.93	1202.48	1140.95	1740.63	1394.09	1520.22	1795.2	1876.2	1139.79	983.286	2873.29	1247.18	0.398557	0.025418	0.0467205	1183.4	1618.88
C5orf56	617.721	516.547	801.665	664.272	987.773	894.257	1095.28	2228.38	2571.67	1279.39	1455.27	924.182	612.434	3132.99	1.10791	0.000543478	0.0014702	717.596	1577.1
C5orf58	398.509	326.951	445.919	510.282	420.45	987.633	618.44	884.259	944.187	775.608	987.141	609.315	423.552	1090.78	0.934491	1.4993e-06	6.53876e-06	420.422	813.435
C5orf60	0	0	0.549839	0	0	2.39426	3.12343	1.26685	1.24235	0	1.69612	2.14926	0.953947	3.00767	3.36798	0.0103491	0.0210405	0.109968	1.75932
C5orf63	662.07	736.316	648.26	575.954	542.109	316.043	332.125	98.8141	203.746	152.222	179.789	441.673	252.796	411.048	-1.32186	2.87454e-18	7.28921e-17	632.942	265.362
C5orf64	11.4041	1.35104	17.5948	10.568	17.6501	0	0	1.26685	0	1.20811	0	0	0	0	-5.07489	1.69816e-06	7.34697e-06	11.7136	0.274996
C5orf66	1725.82	1178.56	1311.91	1591.99	1494.58	4916.62	3308.76	2746.52	3223.9	3735.48	5295.28	3689.2	1568.29	1817.64	1.14665	1.75194e-09	1.2091e-08	1460.57	3366.85
C5orf67	71.5922	30.1732	32.4405	24.9102	34.6698	204.709	146.801	385.122	354.07	239.206	390.107	192.359	82.0394	270.69	2.57713	6.94171e-23	3.20788e-21	38.7572	251.678
C6orf1	141.284	120.693	121.514	123.041	141.201	247.806	234.257	355.984	268.348	263.369	364.665	176.239	116.382	251.642	0.885334	4.19774e-08	2.33395e-07	129.547	253.188
C6orf10	12.0376	5.40415	3.29903	3.77427	3.78216	4.78852	3.12343	0	16.1506	2.41623	0	51.5822	1.90789	7.0179	0.331022	0.679148	0.748705	5.65945	9.6652
C6orf106	7025.54	6283.68	7106.11	7138.66	7092.17	4444.95	4340.53	4668.33	5579.4	5153.81	3460.08	4379.12	4696.28	5149.13	-0.578538	1.7286e-09	1.19553e-08	6929.23	4652.4
C6orf120	1842.39	1880.19	1889.8	1831.28	1549.42	907.425	906.837	629.623	862.192	792.522	761.557	1348.66	1219.14	1048.67	-0.940881	3.25822e-23	1.56667e-21	1798.62	941.848
C6orf132	12.6712	9.45726	13.1961	0.754855	10.7161	22.7455	22.9052	10.1348	36.0282	27.7866	22.0495	21.4926	6.67763	11.0281	1.053	0.0189236	0.0359524	9.35911	20.0942
C6orf136	475.803	497.632	432.173	515.566	527.611	666.802	776.694	862.723	519.303	729.7	854.844	625.435	309.079	785.002	0.438453	0.00605583	0.0130185	489.757	681.064
C6orf163	152.688	69.3533	63.7813	92.0923	64.2967	292.1	114.526	231.833	226.108	176.384	327.351	205.254	96.3486	59.1509	1.02968	0.000298699	0.000847757	88.4423	192.117
C6orf165	7.60272	2.70208	1.09968	10.568	2.52144	31.1254	16.6583	25.3369	12.4235	19.3298	32.2262	16.1194	17.171	16.0409	2.14438	9.4744e-08	4.97229e-07	4.89878	20.7146
C6orf201	159.023	196.801	140.759	169.842	127.333	49.0824	54.1395	15.2022	23.6047	32.619	33.9224	106.388	77.2697	60.1534	-1.79635	4.32422e-15	6.87279e-14	158.752	50.2646
C6orf203	248.355	316.143	322.755	221.172	257.817	189.147	155.131	110.216	110.569	166.72	91.5904	253.613	248.98	173.442	-0.738741	9.36899e-09	5.80572e-08	273.249	166.601
C6orf222	7.60272	2.25173	6.04822	1.50971	1.26072	20.3512	30.1932	68.4097	120.508	27.7866	10.1767	27.9404	14.3092	70.179	3.50255	8.37048e-09	5.22618e-08	3.73462	43.3171
C6orf226	13.9383	6.75519	9.89709	9.05826	5.04288	28.7311	19.7817	21.5364	9.93881	14.4974	15.2651	9.67167	5.72368	8.02046	0.685048	0.0768936	0.122922	8.93835	14.7963
C6orf229	96.9346	79.2609	90.7234	67.1821	75.0128	325.62	386.265	260.97	323.011	306.861	573.288	243.941	248.026	181.463	1.90762	7.25189e-17	1.52362e-15	81.8227	316.605
C6orf25	1090.99	589.503	757.678	1136.06	1831.82	3219.09	3508.66	2604.64	1462.25	3187	5203.69	1115.47	2083.42	2426.19	1.37488	2.64286e-05	9.16523e-05	1081.21	2756.71
C6orf47	1015.6	885.38	912.732	1151.15	1223.53	1374.31	1283.73	2063.69	2233.75	1699.81	1689.33	1124.06	1688.49	1396.56	0.602477	3.99958e-14	5.47685e-13	1037.68	1617.08
C6orf48	1497.73	1662.23	1361.4	1436.49	1083.59	1715.49	1251.46	941.267	929.278	839.638	763.253	1125.14	1509.14	1037.65	-0.326686	0.0411979	0.0716287	1408.29	1123.59
C6orf52	21.541	9.45726	10.4469	14.3422	9.45539	8.37992	9.3703	6.33424	6.21175	6.04056	3.39224	8.59704	16.2171	10.0256	-0.692588	0.0540193	0.0907634	13.0486	8.28541
C6orf58	4.43492	4.05311	3.29903	0.754855	5.04288	0	0	0	0	1.20811	1.69612	1.07463	0.953947	9.02302	-1.43852	0.0907939	0.141965	3.51696	1.55065
C6orf62	13345.9	8975.84	9689.8	10599.7	12355	14534.4	12545.8	13106.8	21238	13419.7	19033.8	10679.7	14843.4	9663.65	0.35529	0.0191274	0.0362996	10993.3	14340.6
C6orf89	7431.02	6521.46	6696.48	7857.28	7525.86	7170.81	6262.48	7544.07	7646.67	7120.62	8758.75	6592.85	7279.57	5069.93	-0.0464335	0.579135	0.661904	7206.42	7049.53
C6orf99	1.26712	1.80138	3.84887	0.754855	5.04288	7.18279	3.12343	1.26685	6.21175	3.62434	3.39224	11.8209	0.953947	2.00511	0.575803	0.326313	0.417914	2.54302	4.39793
C7	0	0.900692	1.64952	0	1.89108	0	3.12343	1.26685	2.4847	1.20811	0	1.07463	0	1.00256	0.321714	0.758074	0.814004	0.888257	1.12892
C7orf13	32.3115	18.0138	17.5948	13.5874	1.89108	21.5484	26.0286	11.4016	16.1506	19.3298	6.78447	41.9106	24.8026	14.0358	0.272252	0.529199	0.617066	16.6797	20.2214
C7orf25	272.431	200.854	188.045	225.702	211.17	457.304	297.767	396.523	711.867	358.809	386.715	458.867	1397.53	173.442	1.13094	0.00152332	0.00375308	219.64	515.425
C7orf26	540.426	514.295	589.427	551.044	656.835	459.698	699.649	784.178	537.938	584.726	588.553	454.568	476.02	584.491	-0.00604452	0.961116	0.971965	570.405	574.425
C7orf31	290.17	331.455	299.662	302.697	295.008	251.397	236.34	349.65	327.981	356.393	167.916	281.553	352.96	276.706	-0.0795373	0.627154	0.703908	303.798	288.988
C7orf34	24.7088	9.90761	26.9421	24.1554	14.4983	185.555	192.612	168.491	115.539	349.145	493.57	274.031	75.3618	109.279	3.32975	6.0704e-23	2.81895e-21	20.0424	218.176
C7orf43	1030.8	650.75	672.453	818.263	907.087	1575.42	1905.29	1508.81	1877.19	1125.96	2535.7	1777.44	893.848	992.532	0.911623	5.1955e-06	2.06483e-05	815.871	1576.91
C7orf49	1125.84	756.581	879.742	1103.6	1105.02	1692.74	1616.9	3279.87	4062.49	3025.11	2415.27	1473.32	1829.67	2255.75	1.20967	1.85542e-11	1.72745e-10	994.155	2405.68
C7orf50	17.7397	20.7159	14.8456	9.81311	15.1286	38.3082	52.0572	50.6739	42.2399	28.9947	20.3534	30.0896	7.63158	32.0818	1.0656	0.00896475	0.0184752	15.6486	33.6034
C7orf55	6.96916	9.45726	8.79742	4.52913	6.93395	2.39426	7.28801	0	3.72705	6.04056	3.39224	1.07463	1.90789	5.01279	-1.09391	0.032088	0.0575331	7.33738	3.42638
C7orf57	19.6403	28.8221	12.0964	16.6068	22.0626	14.3656	9.3703	13.9353	8.69646	9.6649	8.48059	9.67167	8.58552	14.0358	-0.887415	0.00423117	0.0094467	19.8457	10.7562
C7orf60	2462.01	1363.65	1531.85	1863.74	1991.94	2146.46	1839.7	2304.39	2622.6	2013.92	2768.06	1821.5	1587.37	1961	0.185166	0.0569922	0.0951106	1842.64	2118.33
C7orf61	38.0136	9.90761	18.1447	24.1554	28.9965	116.122	121.814	162.156	206.23	89.4003	133.993	73.0748	41.9737	110.281	2.28396	1.1019e-19	3.3539e-18	23.8436	117.227
C7orf71	25.9759	26.1201	11.5466	27.1748	15.759	20.3512	26.0286	24.0701	40.9976	16.9136	30.5301	45.1345	41.0197	46.1176	0.608405	0.046675	0.0799728	21.3153	32.3514
C7orf73	1924.75	2266.59	2048.7	2232.86	2361.96	3211.9	3068.25	3234.26	3184.15	2730.33	3192.09	1720.48	2938.16	2029.18	0.341593	0.0118931	0.023805	2166.97	2812.09
C8B	0	6.75519	0	0	2.52144	0	0	1.26685	0	1.20811	89.8943	0	0.953947	0	-1.59832	0.556031	0.642144	1.85533	10.3692
C8G	3.80136	3.15242	2.19935	2.26456	0.63036	2.39426	3.12343	3.80054	2.4847	4.83245	6.78447	6.44778	2.86184	5.01279	0.750988	0.175258	0.248762	2.40961	4.19359
C8orf31	11.4041	81.5126	9.89709	12.8325	10.7161	37.1111	17.6995	50.6739	57.1481	30.2028	27.1379	31.1643	69.6381	153.391	1.37061	0.00397228	0.00892847	25.2725	52.6852
C8orf33	964.278	1219.09	1043.04	997.918	990.925	398.645	509.12	364.852	436.065	577.478	274.771	463.165	515.131	582.486	-1.18868	4.98336e-21	1.84861e-19	1043.05	457.968
C8orf37	179.297	158.972	163.302	134.364	136.788	99.3619	63.5098	46.8733	45.967	53.157	49.1874	90.2689	107.796	93.2378	-1.13588	2.91922e-10	2.28402e-09	154.545	72.151
C8orf37-AS1	5.06848	8.10623	0.549839	6.03884	1.26072	3.59139	8.32916	5.06739	2.4847	9.6649	3.39224	4.29852	8.58552	4.01023	0.385672	0.483912	0.575336	4.20482	5.49156
C8orf44	250.256	239.584	181.447	323.833	188.477	259.777	190.529	212.83	187.595	199.339	183.181	238.568	288.092	157.401	-0.151975	0.359753	0.452142	236.719	213.035
C8orf44-SGK3	0.63356	2.25173	1.09968	6.79369	3.78216	0	1.04114	1.26685	2.4847	3.62434	3.39224	0	0.953947	0	-1.26076	0.210083	0.289663	2.91216	1.41813
C8orf46	56.3868	77.4595	109.418	95.8666	112.204	41.8996	65.5921	24.0701	49.694	26.5785	117.032	22.5672	57.2368	35.0895	-0.924297	0.0309654	0.0556833	90.2669	48.8622
C8orf58	180.564	162.575	185.845	191.733	254.665	549.483	604.905	497.871	496.94	484.453	747.988	517.972	269.967	642.639	1.4238	1.64669e-17	3.75908e-16	195.077	534.691
C8orf59	1298.8	1569.46	1631.37	1466.68	1417.68	1049.88	913.084	846.254	848.526	1000.32	620.779	902.689	1348.88	1086.77	-0.634505	1.44642e-11	1.36949e-10	1476.8	957.465
C8orf76	71.5922	62.5981	64.8809	49.0656	50.4288	96.9676	105.156	84.8788	54.6634	57.9894	101.767	70.9256	55.3289	67.1713	0.339403	0.1533	0.222329	59.7131	77.2053
C8orf82	22.8081	49.5381	40.1382	21.8908	47.9073	29.9283	37.4812	43.0728	31.0588	38.6596	25.4418	17.1941	22.8947	46.1176	-0.186219	0.478584	0.570463	36.4565	32.4277
C8orf88	8.23628	5.40415	5.49839	5.28398	10.0858	26.3369	9.3703	19.0027	22.3623	31.4109	40.7068	46.2091	12.4013	35.0895	1.89495	1.36015e-07	6.9707e-07	6.90171	26.9878
C9	0	2.70208	2.19935	1.50971	3.78216	4.78852	1.04114	2.53369	0	0	1.69612	1.07463	0	2.00511	-0.585694	0.567774	0.652571	2.03866	1.45991
C9orf106	20.9075	11.2586	9.34726	22.6456	16.3893	20.3512	8.32916	21.5364	57.1481	22.9541	40.7068	10.7463	29.5724	19.0486	0.573781	0.0883654	0.138544	16.1097	25.5992
C9orf114	472.002	591.755	556.437	372.898	460.793	335.197	439.363	362.318	342.889	324.982	306.997	386.867	324.342	414.056	-0.432672	0.00459694	0.0101759	490.777	359.668
C9orf116	2.53424	0	2.19935	0.754855	5.67324	9.57705	1.04114	1.26685	3.72705	1.20811	3.39224	2.14926	0	5.01279	0.461213	0.57546	0.658765	2.23234	3.04161
C9orf117	10.7705	16.2125	14.2958	15.852	10.7161	8.37992	9.3703	7.60108	3.72705	9.6649	13.5689	13.9702	10.4934	7.0179	-0.560105	0.0520438	0.0878688	13.5694	9.31041
C9orf131	155.222	101.778	140.759	185.694	136.158	205.907	171.789	192.561	355.312	250.079	293.428	255.762	123.059	200.511	0.628779	2.89927e-05	9.96848e-05	143.922	227.601
C9orf135	0	18.9145	0	0	0	1.19713	0	0	0	0	0	0	1.90789	0	-1.65022	0.404312	0.497954	3.78291	0.345003
C9orf139	117.209	83.314	63.2314	71.7112	99.5968	410.616	250.916	323.046	375.19	253.704	396.892	214.926	350.099	144.368	1.75124	1.07804e-16	2.21114e-15	87.0124	302.195
C9orf142	62.7224	102.679	78.6269	58.8787	97.7057	68.2365	105.156	100.081	69.5717	48.3245	74.6292	106.388	51.5131	71.1816	-0.0326154	0.924151	0.944999	80.1225	77.2313
C9orf152	3.1678	1.35104	5.49839	0.754855	1.89108	3.59139	14.576	29.1375	8.69646	22.9541	1.69612	9.67167	0.953947	6.01534	2.09071	0.00950135	0.0194628	2.53263	10.8103
C9orf153	13.3048	4.05311	7.1479	4.52913	6.93395	8.37992	7.28801	1.26685	6.21175	4.83245	15.2651	9.67167	2.86184	5.01279	-0.215243	0.628725	0.705188	7.19377	6.75448
C9orf156	1131.54	963.29	991.909	1040.94	1064.68	712.293	659.044	722.103	498.183	885.547	1475.62	1257.32	901.48	608.552	-0.294454	0.114502	0.173217	1038.47	857.793
C9orf16	17.1061	36.0277	29.1414	21.8908	19.5411	37.1111	68.7155	67.1429	48.4517	50.7407	42.403	19.3433	48.6513	52.133	0.92086	0.005737	0.0124005	24.7414	48.2992
C9orf163	0	0.450346	0	0	3.1518	1.19713	3.12343	0	1.24235	0	1.69612	1.07463	0.953947	0	0.500395	0.702627	0.767439	0.720429	1.03196
C9orf171	3.1678	3.60277	2.74919	1.50971	1.26072	2.39426	2.08229	8.86793	0	0	3.39224	3.22389	0.953947	2.00511	-0.0983942	0.895528	0.923504	2.45804	2.54663
C9orf173-AS1	0.63356	1.35104	0	0	1.89108	2.39426	2.08229	0	4.9694	0	3.39224	5.37315	4.76973	6.01534	1.99329	0.0274264	0.0499434	0.775135	3.22182
C9orf24	10.7705	9.45726	5.49839	1.50971	2.52144	8.37992	12.4937	6.33424	3.72705	3.62434	11.8728	3.22389	5.72368	8.02046	0.312613	0.61176	0.690548	5.95146	7.04446
C9orf3	111.506	110.335	116.566	114.738	105.27	153.233	115.567	141.887	109.327	106.314	142.474	170.866	119.243	88.225	0.183254	0.197397	0.274794	111.683	127.46
C9orf40	134.315	117.09	106.669	89.8277	118.508	227.455	201.982	253.369	196.291	221.085	227.28	124.657	108.75	109.279	0.657522	0.00475799	0.010497	113.282	185.572
C9orf41	420.05	390.45	414.578	344.214	402.8	247.806	230.093	184.96	190.08	260.952	176.396	262.21	341.513	274.701	-0.721724	2.69907e-10	2.12535e-09	394.418	240.968
C9orf41-AS1	38.0136	44.1339	46.1864	41.517	27.7358	22.7455	13.5349	1.26685	13.6659	13.2892	16.9612	35.4628	18.125	22.0563	-1.2478	1.89334e-08	1.11678e-07	39.5174	17.4564
C9orf43	7.60272	18.0138	9.89709	13.5874	17.0197	17.957	11.4526	6.33424	16.1506	12.0811	13.5689	13.9702	15.2632	10.0256	-0.0255944	0.938797	0.956216	13.2241	12.9781
C9orf47	33.5787	41.8822	113.817	142.668	42.8644	202.315	45.8104	140.62	64.6022	86.9841	50.8835	46.2091	326.25	62.1585	0.417672	0.322912	0.414257	74.9619	113.981
C9orf64	133.048	139.607	85.225	165.313	109.683	178.373	211.352	169.758	203.746	239.206	188.269	110.687	610.526	74.1892	0.64892	0.0296573	0.0535439	126.575	220.678
[truncated: 16,995 more rows]

## Sheet: Significantly regulated genes
Gene	Healthy_1	Healthy_2	Healthy_3	Healthy_4	Healthy_5	ID1_1st	ID2_1st	ID3_1st	ID4_1st	ID5_1st	ID6_1st	ID7_1st	ID14_1st	ID24_1st	log2FoldChange	pvalue	padj	meanHealthy	mean1st
IFI27	5.06848	10.8083	20.344	5.28398	9.45539	887.074	899.549	9847.2	6733.54	3975.9	530.885	4.29852	4360.49	11100.3	8.63746	1.16644e-18	3.14243e-17	10.192	4259.92
ADAMTS2	1.90068	7.20553	8.79742	8.3034	4.41252	2092.58	1482.59	1659.57	2102.06	2436.76	2243.96	1820.42	4336.64	309.79	8.37262	1.84154e-31	2.64973e-29	6.12391	2053.82
OLAH	18.3732	9.00692	6.59806	31.7039	19.5411	7307.29	1968.8	2822.54	12081.9	2881.35	14824.1	6656.26	2608.09	83.2123	8.28241	1.39411e-21	5.56267e-20	17.0447	5692.61
MAOA	5.06848	8.10623	13.1961	28.6845	6.93395	3930.18	1108.82	1090.76	7132.34	791.314	3261.64	8352.02	5178.98	36.0921	8.1451	5.58757e-12	5.6812e-11	12.3979	3431.35
DAAM2	216.044	88.2678	249.627	95.1117	234.494	14379.9	3959.47	1695.04	8088.95	7148.4	21323.6	14860	7849.08	187.478	5.58143	1.0565e-11	1.02274e-10	176.709	8832.44
ZNF608	224.28	51.7898	111.067	124.551	104.64	4901.05	1302.47	7070.27	15242.4	4048.39	9637.34	7332.2	2293.29	2176.55	5.53393	6.26737e-24	3.35313e-22	123.266	6000.44
ISG15	12.6712	7.20553	31.3408	8.3034	5.67324	63.4479	309.22	1118.63	1492.06	356.393	161.131	36.5374	58.1908	1742.44	5.44833	4.35837e-10	3.31777e-09	13.0388	593.117
EPCAM	7.60272	6.75519	7.69774	3.01942	11.3465	389.068	160.336	115.283	267.105	213.836	737.811	681.315	354.868	17.0435	5.42693	6.07938e-20	1.90852e-18	7.28431	326.296
CD177	92.4997	14.4111	30.791	285.335	113.465	3974.47	2265.53	3405.28	3304.65	1783.17	4443.83	9210.65	7946.38	3894.93	5.37626	1.60171e-12	1.75663e-11	107.3	4469.88
LY6G6C	4.43492	0.900692	2.74919	5.28398	3.1518	241.82	63.5098	153.288	203.746	70.0705	149.258	91.3435	55.3289	105.269	5.28304	1.43511e-29	1.46543e-27	3.30412	125.959
FOXC1	9.50339	3.60277	4.94855	2.26456	7.56431	211.892	32.2755	127.952	223.623	45.9083	659.79	492.18	156.447	94.2404	5.24331	1.98876e-11	1.84256e-10	5.57672	227.145
OTOF	5.06848	36.478	5.49839	32.4588	16.3893	83.7992	40.6046	230.566	839.829	229.541	66.1486	33.3135	331.974	5228.34	5.12944	4.09051e-08	2.28167e-07	19.1786	787.124
CA12	10.7705	0.900692	4.94855	8.3034	4.41252	416.602	65.5921	126.685	181.383	182.425	227.28	194.508	182.204	126.322	5.11855	1.09497e-21	4.44376e-20	5.86713	189.222
LINC01093	31.678	4.05311	4.94855	15.852	14.4983	225.061	153.048	841.186	1502	297.196	242.545	73.0748	543.75	668.706	5.0513	2.63208e-23	1.28843e-21	14.206	505.174
LOC344887	1.26712	1.80138	1.64952	13.5874	3.1518	35.9139	15.6172	255.903	361.524	123.227	67.8447	160.12	62.0066	103.263	5.02776	1.03067e-09	7.3814e-09	4.29144	131.713
PRL	5.70204	0.900692	1.09968	0.754855	0.63036	77.8135	26.0286	21.5364	95.661	37.4515	252.722	56.9554	41.0197	4.01023	5.00991	1.34956e-10	1.1159e-09	1.81752	68.1331
TMIGD3	30.4109	31.5242	39.5884	51.3301	65.5574	1021.15	553.889	421.86	1411.31	1649.07	2639.16	3819.23	1653.19	60.1534	4.98854	1.79271e-12	1.95011e-11	43.6822	1469.89
LINC00487	9.50339	6.30484	19.7942	0.754855	7.56431	65.8422	39.5635	566.281	382.644	186.049	47.4913	17.1941	59.1447	1005.56	4.93455	1.11042e-07	5.74674e-07	8.78432	263.308
RNASE1	24.7088	22.9676	18.1447	15.852	18.9108	466.881	92.6619	120.35	2248.66	1011.19	144.17	61.2539	3169.97	648.655	4.88624	6.82508e-13	7.91384e-12	20.1168	884.865
ALOX15B	19.6403	17.5635	22.5434	26.4199	22.0626	1112.13	279.027	146.954	357.797	532.778	1219.51	1150.93	928.19	27.069	4.85838	5.16358e-09	3.31548e-08	21.6459	639.376
C4BPA	69.6916	19.3649	24.1929	55.1044	54.8413	4177.99	147.843	519.407	9092.77	381.764	659.79	155.821	62.0066	32.0818	4.60902	3.2881e-06	1.35439e-05	44.639	1692.16
SMTNL1	190.068	125.196	238.63	110.209	233.863	1473.67	1560.68	4480.84	13086.9	6050.23	636.044	1070.33	1048.39	6496.57	4.51146	6.52237e-09	4.13621e-08	179.593	3989.3
MYO1B	22.8081	55.8429	35.7395	70.2015	28.3662	1537.12	314.426	195.094	928.036	471.164	2186.3	2624.25	1009.28	33.0844	4.49706	2.90325e-07	1.40667e-06	42.5916	1033.19
SIGLEC1	148.253	181.94	770.874	362.33	182.804	3023.95	901.631	12106	14566.6	9890.82	390.107	378.27	10595.5	26708.1	4.49495	4.36944e-10	3.32088e-09	329.24	8728.99
GRB10	366.197	229.676	252.376	296.658	361.826	7555.09	5745.03	4765.88	8036.77	4744.26	24938	9959.67	4298.48	831.12	4.49201	1.4096e-29	1.44716e-27	301.347	7874.93
GADD45G	1.90068	1.35104	3.29903	2.26456	4.41252	29.9283	80.1681	126.685	88.2069	47.1164	135.689	29.015	5.72368	76.1944	4.47733	1.56e-17	3.56893e-16	2.64557	68.7474
IL1R2	4449.49	875.472	2718.4	3493.47	4725.81	81953.2	45663.6	24174	73777	71931	182389	119514	53174	9670.67	4.46108	3.60776e-20	1.18142e-18	3252.53	73582.9
ABCC11	6.3356	4.95381	3.84887	3.01942	8.82503	156.824	178.036	10.1348	50.9364	107.522	308.694	221.374	103.026	6.01534	4.44442	1.98355e-10	1.59905e-09	5.39654	126.951
RSAD2	662.07	536.812	2863.01	1007.73	963.82	4659.23	6511.32	40083	62603.3	28124.9	4533.72	1581.86	10861.6	70329.4	4.36523	1.93594e-07	9.68122e-07	1206.69	25476.5
CAPN13	25.3424	2.70208	4.94855	6.79369	1.89108	319.634	139.513	306.577	99.3881	204.171	330.743	46.2091	28.6184	98.2506	4.33828	2.30326e-18	5.91159e-17	8.33556	174.789
GLDN	1.90068	1.80138	9.34726	11.3228	8.82503	253.792	36.4401	82.3451	188.837	22.9541	137.386	119.284	221.316	68.1739	4.25704	8.09801e-10	5.90878e-09	6.63944	125.614
LINC01118	5.70204	3.15242	0.549839	6.03884	2.52144	87.3906	49.9749	26.6038	83.2375	45.9083	118.728	72.0002	88.7171	9.02302	4.21965	3.82328e-13	4.59592e-12	3.59291	64.6204
CYP19A1	0.63356	1.35104	4.94855	1.50971	5.04288	23.9426	36.4401	15.2022	131.689	12.0811	44.0991	13.9702	115.428	76.1944	4.21236	1.33527e-08	8.07926e-08	2.69715	52.1163
MT2A	41.1814	64.3995	57.1832	29.4393	45.3859	368.716	1025.53	823.451	1380.25	570.229	461.344	789.853	79.1776	2147.48	4.15358	1.84056e-18	4.78872e-17	47.5179	849.559
HMP19	10.137	2.25173	5.49839	12.0777	5.04288	228.652	13.5349	254.636	90.6916	209.003	33.9224	65.5524	18.125	125.32	4.09747	1.6664e-11	1.56141e-10	7.00152	115.493
IFI44L	1449.58	2637.23	6683.84	3174.92	1758.7	9087.42	7504.57	67935.9	112101	68991.7	4085.95	5013.15	40108.7	151830	4.0719	9.34197e-07	4.1956e-06	3140.85	51851
SLC1A3	19.6403	56.7436	38.4887	57.369	33.4091	1357.55	150.966	173.558	498.183	533.986	771.734	330.986	2501.25	186.476	4.05025	2.80127e-13	3.41492e-12	41.1301	722.743
SFRP1	15.839	2.25173	12.0964	6.03884	4.41252	347.168	136.39	32.938	101.873	80.9435	305.301	130.03	75.3618	9.02302	4.00809	1.70124e-08	1.00911e-07	8.1277	135.448
NRIR	79.8285	71.1547	210.038	92.8472	105.9	483.641	470.597	2194.18	3385.41	2608.32	259.506	150.448	566.644	5220.32	3.97433	4.67448e-07	2.19053e-06	111.954	1704.34
COL9A2	127.979	141.409	102.27	123.796	177.131	3854.76	1804.3	885.526	2803.99	3979.52	3823.05	1340.06	1070.33	389.995	3.97362	1.23051e-20	4.35217e-19	134.517	2216.84
AP3B2	18.3732	4.50346	9.89709	6.79369	1.89108	120.91	12.4937	556.146	124.235	18.1217	1526.51	19.3433	65.8223	124.317	3.96114	9.13887e-06	3.47358e-05	8.29171	285.322
BATF2	39.9143	20.2656	113.267	48.3107	134.897	239.426	520.572	2185.31	3287.26	1145.29	278.163	270.807	1325.99	1643.19	3.93038	3.48815e-08	1.97115e-07	71.3308	1210.67
LSMEM2	3.80136	1.35104	4.39871	0.754855	2.52144	55.068	37.4812	41.806	68.3293	43.4921	74.6292	16.1194	5.72368	49.1253	3.9218	2.34322e-16	4.56459e-15	2.56548	43.5305
LY6E	420.05	686.327	1140.37	546.515	700.96	2764.18	5872.05	19651.3	27192.6	11744.1	3694.15	614.688	4565.59	23003.7	3.89268	4.68893e-08	2.58511e-07	698.843	11011.4
AMPH	38.0136	57.1939	39.5884	35.4782	36.5609	629.691	419.581	244.501	559.058	427.672	1394.21	867.226	963.486	47.1202	3.88947	1.90584e-15	3.1836e-14	41.367	616.949
KCNMA1	21.541	34.6766	1.64952	2.26456	63.036	872.708	153.048	758.841	759.076	1036.56	975.268	191.284	20.9868	154.394	3.82869	6.40649e-06	2.50161e-05	24.6335	546.908
VSIG4	203.373	200.404	259.524	154.745	267.272	4825.63	1405.54	2708.52	3560.58	1495.64	1533.29	2604.9	15732.5	226.578	3.82711	8.0137e-13	9.1657e-12	217.064	3788.13
TULP2	18.3732	1.80138	7.1479	3.01942	15.759	114.925	84.3327	169.758	129.204	90.6084	149.258	47.2837	35.296	219.56	3.8176	1.81664e-13	2.26847e-12	9.22018	115.581
SAP30	166.626	185.993	177.048	208.34	190.369	3949.33	2018.78	889.327	2949.34	3965.03	3473.65	2179.35	3749.97	239.611	3.81051	2.18123e-13	2.69714e-12	185.675	2601.6
DYNC1I1	10.7705	3.60277	0.549839	12.0777	4.41252	79.0106	41.6458	24.0701	57.1481	337.063	78.0214	123.582	27.6645	8.02046	3.80808	7.05697e-07	3.23127e-06	6.28266	86.2474
SCN5A	4.43492	5.40415	8.24758	7.54855	10.7161	13.1684	113.485	26.6038	233.562	111.146	281.556	396.538	20.9868	9.02302	3.8077	3.72309e-06	1.51646e-05	7.27026	134.008
HIST1H4D	6.96916	0.450346	3.29903	8.3034	7.56431	69.4336	72.8801	74.744	131.689	88.1922	64.4525	29.015	35.296	69.1765	3.80172	1.07188e-23	5.50397e-22	5.31725	70.5421
GPER1	5.70204	3.60277	2.19935	3.77427	1.26072	40.7025	33.3166	69.6766	55.9058	84.5679	57.668	24.7165	89.671	12.0307	3.77818	4.84421e-14	6.54847e-13	3.30783	52.0284
IL18R1	2406.26	2141.39	2444.03	2536.31	2702.35	42548.4	13779.5	6378.57	39537.8	45386.4	62524	37017.8	42584.2	5157.15	3.7595	1.12953e-12	1.26567e-11	2446.07	32768.2
ECHDC3	81.7292	35.127	76.4276	62.653	153.808	1222.27	781.899	295.175	575.208	1611.62	3254.85	2320.13	695.427	156.399	3.74764	2.32332e-16	4.53099e-15	81.9489	1212.55
IRF7	40.5478	61.247	91.2732	42.2719	52.3198	172.387	396.676	1175.63	2288.41	692.249	334.135	178.389	253.75	1869.77	3.7445	8.5477e-12	8.40738e-11	57.532	817.933
SLC12A1	138.75	20.7159	79.7266	130.59	90.1414	179.57	117.649	163.423	6906.23	79.7354	488.482	101.015	51.5131	3112.94	3.72685	5.41179e-05	0.000177126	91.9847	1244.51
FBXO39	13.3048	12.1593	20.8939	6.79369	3.1518	32.3225	38.5223	125.418	248.47	151.014	16.9612	16.1194	86.8092	317.811	3.7058	0.000179963	0.000534067	11.2607	114.827
IGLL5	307.276	216.616	617.469	344.214	191.629	2846.78	1144.22	1081.89	1352.92	9056.01	651.309	529.793	2078.65	12630.2	3.69669	0.000182619	0.0005406	335.441	3485.75
TPST1	731.761	152.667	533.343	683.144	804.969	9126.93	6782.01	3817.01	8710.12	9312.13	14571.4	8072.62	6188.25	860.194	3.69624	1.86674e-14	2.67989e-13	581.177	7493.4
PTGFR	3.80136	3.15242	3.29903	9.81311	7.56431	50.2795	46.8515	60.8087	181.383	31.4109	18.6573	66.6271	141.184	60.1534	3.67834	4.24609e-13	5.05617e-12	5.52605	73.0395
IFITM3	571.471	772.343	1825.46	389.505	1875.95	2202.72	12855	34270.7	41469.7	20217.8	10458.3	1792.48	13490.7	20633.6	3.66301	4.93351e-14	6.66446e-13	1086.95	17487.9
RLN3	1.26712	1.80138	2.19935	0.754855	1.89108	21.5484	9.3703	5.06739	34.7858	19.3298	15.2651	20.418	53.421	1.00256	3.59784	1.46648e-07	7.47328e-07	1.58276	20.0231
HLA-G	1.26712	2.70208	0.549839	1.50971	1.89108	31.1254	13.5349	32.938	24.847	18.1217	3.39224	27.9404	11.4474	14.0358	3.59375	1.05769e-08	6.50118e-08	1.58396	19.7092
MGC16025	10.137	0.900692	2.19935	4.52913	3.1518	29.9283	38.5223	57.0081	147.84	65.2381	83.1098	15.0448	23.8487	40.1023	3.58169	3.55281e-20	1.16745e-18	4.18359	55.6269
SYN2	23.4417	4.50346	10.4469	9.81311	9.45539	93.3762	49.9749	162.156	245.985	114.771	330.743	165.493	80.1315	88.225	3.58168	4.80168e-28	4.26161e-26	11.5321	147.873
PRCD	3.80136	2.25173	7.1479	1.50971	0.63036	20.3512	15.6172	25.3369	62.1175	14.4974	50.8835	84.8958	41.0197	11.0281	3.56945	3.07514e-08	1.75447e-07	3.06821	36.1942
C5orf30	291.437	246.339	200.141	246.838	266.642	3685.97	1862.61	1059.08	4110.94	2721.88	3212.45	4136.25	4702	235.601	3.55854	3.19073e-08	1.81496e-07	250.28	2858.53
EPSTI1	1477.46	1479.39	3336.97	1417.62	2076.4	12812.9	18773.9	35034.7	41744.2	28325.4	13212.8	5214.1	11916.7	37515.7	3.5563	5.2915e-08	2.89046e-07	1957.57	22727.8
ETV7	109.606	35.5773	119.315	117.003	35.3001	286.114	753.789	1333.99	3899.74	914.541	45.7952	121.433	414.967	1910.87	3.55477	1.75584e-05	6.3041e-05	83.3602	1075.69
MYO16-AS1	39.9143	4.95381	9.89709	52.8398	8.82503	244.215	540.354	238.167	248.47	304.444	471.521	74.1495	192.697	46.1176	3.54459	9.89163e-14	1.28856e-12	23.286	262.237
CLDN9	16.4726	1.80138	14.2958	12.0777	23.9537	232.243	162.419	240.701	201.261	187.257	164.523	98.8659	68.6842	80.2046	3.54439	2.30612e-24	1.29586e-22	13.7202	159.573
DUSP13	12.0376	2.25173	1.09968	12.0777	11.9768	22.7455	57.2629	95.0135	150.324	57.9894	169.612	112.836	83.9473	43.11	3.53768	5.63352e-13	6.61295e-12	7.88871	88.0935
ACBD7	16.4726	24.3187	25.8424	6.03884	17.6501	499.204	58.3041	64.6092	310.588	147.39	456.256	223.523	128.783	29.0742	3.52473	9.94885e-09	6.141e-08	18.0645	213.081
LOC101927153	302.208	225.623	173.199	271.748	279.249	3438.16	2122.89	1174.37	4651.36	2021.17	5432.67	4311.41	2887.6	421.074	3.52441	2.35907e-19	6.91448e-18	250.405	2940.08
INHBB	70.9587	21.1663	24.7427	33.2136	32.7787	351.956	374.812	406.658	323.011	495.326	1178.8	895.167	118.289	143.366	3.5223	1.82952e-21	7.20913e-20	36.572	476.376
CLVS1	2.53424	3.15242	0.549839	1.50971	2.52144	25.1397	11.4526	19.0027	22.3623	27.7866	76.3253	33.3135	22.8947	4.01023	3.51887	3.99998e-11	3.5451e-10	2.05353	26.9209
SERPING1	485.307	132.852	784.07	332.136	607.036	902.637	4795.51	9315.13	14053.5	5321.74	1085.52	479.285	2529.87	11559.5	3.51562	8.95155e-07	4.03075e-06	468.28	5560.29
KCNE1	347.191	183.741	250.726	248.347	328.417	3040.71	1630.43	2097.9	4420.28	3745.15	4947.58	2952.01	4853.68	617.575	3.50594	3.00477e-18	7.60929e-17	271.685	3145.04
C6orf222	7.60272	2.25173	6.04822	1.50971	1.26072	20.3512	30.1932	68.4097	120.508	27.7866	10.1767	27.9404	14.3092	70.179	3.50255	8.37048e-09	5.22618e-08	3.73462	43.3171
FCGR1C	83.6299	29.7228	20.344	53.5947	54.8413	134.079	196.776	671.429	2079.7	552.107	349.4	77.3733	538.98	888.266	3.49488	9.02164e-12	8.84149e-11	48.4265	609.79
ARG1	1792.97	330.554	658.157	1712.77	1718.36	10898.7	9842.98	6490.06	17349.4	6012.78	44224.6	19831.2	10454.3	1710.36	3.47614	1.20426e-13	1.55173e-12	1242.56	14090.5
LINC00930	1.90068	1.35104	1.64952	2.26456	0.63036	19.1541	7.28801	34.2049	14.9082	21.746	15.2651	26.8657	5.72368	16.0409	3.47223	4.36746e-10	3.32088e-09	1.55923	17.9107
SLC2A14	15.839	4.95381	10.4469	9.05826	23.3233	29.9283	196.776	60.8087	575.208	54.3651	50.8835	20.418	45.7895	233.596	3.4643	3.86361e-07	1.83133e-06	12.7243	140.864
TNFRSF17	27.8766	12.6097	81.3761	19.6262	16.3893	645.254	51.0161	139.353	60.8752	1144.08	47.4913	30.0896	394.934	361.923	3.45784	6.84265e-05	0.000219791	31.5756	319.447
MIR650	13.3048	14.4111	79.1768	3.77427	6.3036	1195.93	10.4114	51.9407	22.3623	113.563	30.5301	126.806	60.0987	578.476	3.45432	0.000405255	0.00112113	23.3941	243.347
OOSP1	13.9383	0.900692	1.09968	3.77427	3.78216	68.2365	36.4401	76.0108	40.9976	36.2434	35.6185	45.1345	4.76973	66.1688	3.44219	1.93536e-11	1.7966e-10	4.69902	45.5133
C1QC	0.63356	4.05311	9.89709	4.52913	3.1518	7.18279	27.0698	51.9407	196.291	42.2839	10.1767	26.8657	61.0526	60.1534	3.42762	1.17995e-08	7.18985e-08	4.45294	53.6686
CCNA1	41.1814	1.35104	23.0932	18.8714	17.0197	86.1934	26.0286	354.717	641.053	445.794	50.8835	98.8659	454.079	193.494	3.42558	1.189e-08	7.24034e-08	20.3033	261.234
HIST1H3D	22.1746	9.45726	12.0964	14.3422	18.9108	153.233	89.5384	131.752	371.463	225.917	117.032	52.6569	128.783	245.627	3.42533	8.45296e-20	2.58947e-18	15.3963	168.445
RPH3A	146.986	393.152	125.913	213.624	171.458	2646.86	2496.66	9232.78	3012.7	840.846	14902.1	1144.48	496.052	2153.49	3.4231	2.93736e-07	1.42247e-06	210.227	4102.89
LOC731424	242.02	52.6905	106.669	168.333	126.702	855.949	394.594	2470.35	3729.54	1617.66	1891.17	485.733	1278.29	1656.22	3.42105	3.80275e-24	2.07545e-22	139.283	1597.72
MIR3945	12.0376	3.15242	7.69774	12.0777	6.3036	40.7025	29.152	38.0054	130.447	91.8166	147.562	82.7465	111.612	99.2532	3.41936	4.21303e-17	9.16588e-16	8.25381	85.6997
GSDMC	11.4041	3.15242	1.09968	6.79369	3.78216	40.7025	36.4401	93.7467	106.842	72.4868	52.5797	19.3433	23.8487	61.156	3.40674	5.20562e-12	5.3099e-11	5.2464	56.3495
SNORA31	1.90068	3.15242	1.09968	1.50971	0.63036	22.7455	15.6172	22.8032	33.5435	8.45679	39.0107	24.7165	6.67763	17.0435	3.40465	5.81863e-13	6.80501e-12	1.65857	21.1794
DUSP1	8712.71	3233.93	8448.27	8473.25	9776.88	72971.1	76056.6	75024	99176.9	62680.5	123633	110121	47534.2	64432.3	3.38423	4.33636e-84	5.34981e-80	7729.01	81292.2
NNMT	5.06848	4.05311	2.74919	0.754855	6.3036	41.8996	32.2755	2.53369	37.2705	47.1164	117.032	97.7913	20.9868	6.01534	3.38214	1.91057e-06	8.18022e-06	3.78585	44.769
MZB1	100.102	65.7505	81.9259	61.8981	40.343	1294.1	189.488	307.844	214.927	2355.82	171.308	227.822	308.125	914.332	3.38205	3.13186e-06	1.29481e-05	70.004	664.863
LINC00428	0.63356	0.900692	4.94855	1.50971	5.04288	26.3369	8.32916	82.3451	36.0282	14.4974	11.8728	8.59704	8.58552	52.133	3.37769	4.74664e-05	0.000156855	2.60708	27.6361
DLL4	1.26712	2.70208	2.19935	0.754855	5.04288	49.0824	20.8229	25.3369	38.5129	33.8272	22.0495	17.1941	11.4474	15.0384	3.36495	1.93344e-11	1.79569e-10	2.39326	25.9235
FOS	3342.03	1314.11	3963.79	4344.94	4516.53	52210.5	26615.8	32076.6	30841.4	32047.6	38564.6	40613.5	40498.9	25899.1	3.36167	1.17576e-41	6.97849e-39	3496.28	35485.3
TMEM45A	7.60272	47.7367	9.89709	15.852	12.6072	597.368	12.4937	87.4124	45.967	97.8571	78.0214	45.1345	762.204	29.0742	3.35632	3.24601e-07	1.55803e-06	18.7391	195.059
FKBP5	8622.11	5910.34	7411.27	9800.28	5559.14	87650.3	57417	23687.5	76065.4	93545.4	155146	81469.8	107475	7505.14	3.35011	7.80329e-12	7.7474e-11	7460.63	76662.4
SERPINA9	6.96916	1.35104	5.49839	5.28398	6.93395	73.025	19.7817	93.7467	88.2069	50.7407	113.64	46.2091	8.58552	44.1125	3.35007	2.39694e-18	6.12721e-17	5.2073	59.7831
ARMC12	44.9827	37.3787	20.8939	18.8714	19.5411	301.677	210.311	135.553	331.708	253.704	483.394	627.584	272.829	55.1406	3.34446	1.45953e-14	2.14558e-13	28.3336	296.878
GALNT14	230.616	22.9676	49.4855	148.706	51.6895	1018.76	613.234	1228.84	1270.93	1372.42	1541.77	485.733	508.454	657.678	3.34042	5.12781e-20	1.63136e-18	100.693	966.423
LOC100272216	278.766	333.706	155.604	274.012	230.712	1048.69	901.631	1317.52	7896.38	3329.56	2513.65	1592.6	1256.35	4621.79	3.3387	2.62668e-16	5.0803e-15	254.56	2719.8
IFIT3	4149.18	1602.78	8099.12	5471.19	4273.84	14625.3	16380.3	75225.4	131237	63515.3	13699.5	5936.26	36390.2	103381	3.33522	2.90105e-07	1.40596e-06	4719.22	51154.5
C7orf34	24.7088	9.90761	26.9421	24.1554	14.4983	185.555	192.612	168.491	115.539	349.145	493.57	274.031	75.3618	109.279	3.32975	6.0704e-23	2.81895e-21	20.0424	218.176
IGF1	4.43492	2.25173	18.6945	6.79369	0.63036	108.939	5.20572	17.7359	27.3317	170.344	11.8728	21.4926	57.2368	67.1713	3.32673	5.8782e-05	0.000190976	6.56104	54.1477
MIR5690	8.86983	9.90761	5.49839	3.77427	3.1518	87.3906	32.2755	32.938	100.63	103.898	117.032	114.985	29.5724	15.0384	3.31925	1.89789e-11	1.76353e-10	6.24038	70.4178
MAB21L3	102.637	18.9145	20.344	47.5559	31.518	411.813	211.352	487.736	509.364	763.527	586.857	430.927	204.145	244.624	3.31657	3.84842e-21	1.45026e-19	44.1938	427.816
IFI44	2117.36	3198.36	6925.77	3935.81	2784.3	12250.2	9973.12	59199.8	82620.1	50525.7	6021.22	5675.12	27946.8	94056.9	3.31428	6.26701e-07	2.89257e-06	3792.32	38696.6
SLC26A8	1106.83	91.8706	317.807	845.438	926.628	3296.9	2218.68	8117.96	11334	7599.03	8082	2945.56	5066.41	6388.29	3.31004	1.30698e-17	3.00892e-16	657.714	6116.53
FER1L4	12.0376	18.4642	11.5466	11.3228	3.78216	271.749	37.4812	21.5364	69.5717	216.252	30.5301	106.388	72.5	95.2429	3.30559	3.15722e-07	1.51964e-06	11.4307	102.361
PFKFB2	2802.87	1561.8	2223	3282.86	2440.75	27113.8	10839.4	8299.12	20664	25411.4	56063.5	44154.4	26135.3	5791.77	3.29779	2.74918e-12	2.89121e-11	2462.26	24941.4
OR2B6	5.06848	17.5635	15.9453	6.79369	20.1715	183.161	92.6619	391.456	85.7222	192.09	66.1486	21.4926	86.8092	78.1995	3.27238	2.46513e-07	1.21174e-06	13.1085	133.082
LOC283575	64.6231	34.6766	56.6334	52.8398	57.9931	870.314	637.18	464.933	662.173	374.515	807.352	311.643	383.487	92.2353	3.2365	1.12788e-15	1.9653e-14	53.3532	511.537
MMP9	2171.84	96.8244	526.195	1042.45	1415.16	6663.23	7528.52	7794.91	15781.6	7136.32	26925.9	5151.78	8352.76	2916.44	3.22469	6.56944e-14	8.74988e-13	1050.49	9805.71
HIST1H2BE	2.53424	4.95381	5.49839	6.79369	3.78216	43.0967	21.864	40.5391	75.7834	38.6596	32.2262	32.2389	35.296	69.1765	3.20352	2.22415e-14	3.15013e-13	4.71246	43.2089
UNC5A	0.63356	3.15242	1.64952	4.52913	0.63036	25.1397	15.6172	30.4043	27.3317	8.45679	44.0991	10.7463	8.58552	29.0742	3.2017	3.61775e-09	2.38998e-08	2.119	22.1616
CASR	2.53424	4.50346	2.19935	2.26456	0.63036	40.7025	27.0698	22.8032	18.6353	26.5785	62.7564	12.8956	13.3553	6.01534	3.19874	2.41578e-09	1.63575e-08	2.4264	25.6457
TNFAIP6	552.464	203.556	336.501	812.979	579.931	2361.94	1881.35	5878.17	8318.78	4565.46	6311.26	2152.48	4586.58	5436.87	3.19435	2.28725e-22	1.00793e-20	497.086	4610.32
AQP7P1	0.63356	1.35104	7.69774	0.754855	3.1518	43.0967	7.28801	3.80054	3.72705	8.45679	118.728	8.59704	48.6513	6.01534	3.18684	0.000135772	0.000413389	2.7178	27.5957
PVRL2	36.7465	81.0623	71.479	66.4272	59.8842	65.8422	141.596	217.898	340.404	410.758	3979.09	202.03	1088.45	392	3.18623	6.48501e-05	0.000208904	63.1198	759.786
SERPINA11	9.50339	4.05311	5.49839	13.5874	10.0858	135.276	22.9052	91.213	105.6	91.8166	191.661	42.9852	28.6184	57.1458	3.18206	1.52905e-19	4.58789e-18	8.54561	85.2468
LINC00642	2.53424	0.900692	0.549839	2.26456	1.89108	39.5053	6.24687	35.4717	1.24235	32.619	5.08835	1.07463	0.953947	7.0179	3.1803	0.000670794	0.00178562	1.62808	14.3578
ITLN2	3.80136	0.900692	2.19935	3.01942	2.52144	25.1397	14.576	19.0027	26.0894	43.4921	11.8728	12.8956	3.81579	38.0972	3.17676	4.52609e-09	2.93093e-08	2.48845	21.6646
GBP6	51.3183	24.3187	74.2282	38.4976	82.5771	79.0106	400.841	635.957	1595.18	715.203	169.612	132.179	248.98	724.849	3.17431	6.10054e-09	3.88426e-08	54.188	522.423
AATK	40.5478	22.5173	27.4919	18.8714	52.3198	226.258	336.29	309.111	493.213	251.287	803.96	274.031	93.4868	197.504	3.16937	4.73149e-15	7.4763e-14	32.3497	331.682
GBP1P1	14.5719	41.8822	124.264	35.4782	128.593	25.1397	165.542	1174.37	1851.1	457.875	32.2262	24.7165	357.73	1907.87	3.16635	0.000350408	0.000982622	68.9578	666.285
PSORS1C3	9.50339	14.4111	8.24758	36.9879	8.82503	59.8565	41.6458	45.6065	426.126	187.257	76.3253	152.597	81.0855	189.483	3.16532	1.55018e-08	9.2645e-08	15.595	139.998
FFAR3	4.43492	4.50346	8.79742	18.1165	15.759	25.1397	23.9463	286.307	161.506	82.1517	45.7952	4.29852	46.7434	227.58	3.14821	1.44226e-07	7.36367e-07	10.3223	100.385
ASB9P1	32.9451	5.8545	14.2958	21.1359	12.6072	153.233	56.2218	183.693	213.684	223.501	230.672	103.164	73.4539	153.391	3.14791	9.64225e-24	5.0174e-22	17.3677	154.557
GPRC5D	10.7705	3.15242	17.5948	3.77427	10.0858	88.5877	11.4526	29.1375	33.5435	329.815	10.1767	24.7165	78.2236	53.1355	3.14697	0.000396352	0.00110009	9.07556	73.1987
LINC00482	23.4417	27.9214	44.5369	95.8666	40.343	495.612	257.163	481.402	446.004	501.367	393.499	356.777	633.421	159.407	3.1457	5.3775e-13	6.33198e-12	46.4219	413.85
KCNJ2-AS1	172.962	51.7898	76.9774	126.816	93.2932	842.78	385.223	1111.02	1434.92	1125.96	1582.48	686.688	700.197	658.68	3.14314	1.98507e-37	7.25048e-35	104.368	947.55
PYCR1	5.70204	0.900692	1.09968	1.50971	1.89108	21.5484	16.6583	12.6685	11.1812	60.4056	5.08835	2.14926	10.4934	33.0844	3.14194	2.17776e-05	7.67816e-05	2.22064	19.253
BTN1A1	6.3356	6.75519	9.89709	3.01942	5.67324	81.4049	41.6458	86.1456	81.9952	73.6949	52.5797	22.5672	46.7434	49.1253	3.13573	7.14781e-19	1.9761e-17	6.33611	59.5447
CEACAM4	1331.74	370.184	769.774	856.005	1170.58	7990.85	6796.59	5011.65	7733.63	9492.14	15382.1	8833.46	7871.02	1934.94	3.13406	1.51297e-19	4.5468e-18	899.657	7894.04
LIFR	6.3356	4.05311	1.64952	0.754855	0.63036	58.6594	10.4114	45.6065	31.0588	1.20811	325.655	39.7613	5.72368	4.01023	3.13247	5.99627e-05	0.000194446	2.68469	58.0105
CACNA1A	43.0821	14.4111	37.9389	27.9296	29.6269	347.168	165.542	316.712	587.632	215.044	312.086	102.09	125.921	343.877	3.13054	8.4038e-24	4.42142e-22	30.5977	279.563
SCRG1	24.0753	26.1201	14.2958	24.9102	18.2804	292.1	144.719	93.7467	166.475	207.795	244.241	224.598	299.539	15.0384	3.12761	1.40374e-11	1.33411e-10	21.5364	187.584
SFN	17.1061	5.40415	12.6463	15.0971	8.82503	102.953	113.485	174.825	172.687	73.6949	150.955	51.5822	13.3553	138.353	3.12584	2.74613e-12	2.8896e-11	11.8157	110.21
NTNG2	297.139	68.0022	169.35	277.032	211.17	1182.77	1155.67	2110.57	3084.76	1641.83	2652.73	1053.14	473.158	2810.17	3.11971	2.60237e-26	1.83743e-24	204.539	1796.09
IFIT1	1582.63	832.69	5542.92	2718.99	1949.7	7606.57	6282.27	35955.7	57318.3	29012.8	6099.24	1716.18	18229	54618.3	3.11709	1.10401e-05	4.12929e-05	2525.39	24093.2
OPLAH	16.4726	4.50346	13.1961	8.3034	15.1286	34.7168	56.2218	172.291	188.837	99.0652	244.241	76.2987	82.9934	58.1483	3.11615	1.7056e-16	3.39565e-15	11.5208	112.535
DCLK3	1.26712	1.35104	2.19935	2.26456	0.63036	21.5484	12.4937	32.938	14.9082	8.45679	42.403	11.8209	0.953947	9.02302	3.11403	5.8462e-07	2.70888e-06	1.54249	17.1718
HEPH	26.6095	0.450346	17.5948	4.52913	24.584	220.272	122.855	3.80054	108.085	12.0811	651.309	3.22389	85.8552	68.1739	3.11123	0.00194238	0.00466922	14.7536	141.74
CYP1A1	1.90068	0.450346	2.19935	7.54855	0.63036	38.3082	12.4937	10.1348	44.7246	12.0811	33.9224	7.52241	7.63158	24.0614	3.11029	9.91405e-08	5.18012e-07	2.54586	21.2089
PDE4C	1.26712	0.900692	1.09968	2.26456	3.78216	33.5197	15.6172	10.1348	23.6047	4.83245	32.2262	22.5672	2.86184	14.0358	3.10683	1.01909e-06	4.54998e-06	1.86284	17.7111
CNGB1	19.6403	2.70208	4.39871	15.852	10.7161	77.8135	12.4937	152.022	137.901	89.4003	222.191	54.8061	47.6973	65.1662	3.10266	3.81729e-14	5.24615e-13	10.6618	95.499
HIST1H2BD	110.873	122.944	106.119	129.08	179.022	1031.93	898.508	1330.19	2648.69	1252.81	658.094	434.15	1170.49	1105.82	3.10232	1.47664e-23	7.39995e-22	129.608	1170.08
CMPK2	503.046	637.239	1604.98	865.064	682.679	1908.23	2343.62	12595	18737.1	9876.32	2179.51	959.644	4492.14	16955.2	3.10186	4.24685e-06	1.71582e-05	858.602	7782.98
LINC00671	296.506	65.3002	101.72	181.165	137.418	2014.77	1160.88	1603.83	890.766	1450.94	3531.32	1285.26	393.98	514.312	3.08676	1.61147e-23	8.05437e-22	156.422	1427.34
CCL20	1.26712	6.30484	6.59806	0.754855	1.26072	4.78852	12.4937	7.60108	33.5435	21.746	213.711	15.0448	42.9276	14.0358	3.07086	1.59111e-05	5.75727e-05	3.23712	40.6547
ODF3B	31.678	39.6304	29.1414	40.7622	27.1055	102.953	194.694	620.755	704.413	237.998	196.75	76.2987	98.2565	564.44	3.05436	3.26025e-12	3.39156e-11	33.6635	310.729
SRGAP1	35.4793	45.4849	36.8392	52.085	26.4751	524.343	160.336	105.148	115.539	416.799	547.846	412.658	552.335	72.1841	3.04625	2.75646e-12	2.89566e-11	39.2727	323.021
HIST2H2BF	34.2122	7.65588	25.2926	36.9879	39.0823	253.792	146.801	150.755	298.164	216.252	218.799	164.418	186.974	442.128	3.04566	1.09724e-20	3.89529e-19	28.6462	230.898
GLDC	29.7773	13.5104	23.6431	6.79369	13.8679	288.509	35.3989	67.1429	40.9976	463.915	28.834	47.2837	143.092	135.345	3.04254	1.79086e-06	7.70064e-06	17.5185	138.946
CD163L1	26.6095	26.1201	29.6913	17.3617	23.9537	196.329	128.061	157.089	279.529	151.014	123.817	189.135	664.901	78.1995	3.04212	4.72445e-15	7.4714e-14	24.7472	218.675
FGF13	16.4726	1.80138	4.39871	98.1311	44.1252	47.8852	232.175	877.925	418.672	61.6137	469.825	68.7763	87.7631	94.2404	3.03687	1.85223e-07	9.2969e-07	32.9858	262.097
CHIT1	55.7532	31.0739	30.2411	351.762	57.3627	523.146	1217.1	1207.31	2051.12	366.058	1207.64	208.478	385.395	407.038	3.03237	1.74019e-08	1.03092e-07	105.239	841.475
ANKRD22	279.4	65.3002	246.878	301.942	329.048	913.411	649.674	3563.64	4677.45	1870.16	1458.66	855.405	1768.62	2852.28	3.02835	4.32779e-13	5.14701e-12	244.513	2067.7
ITGA7	42.4485	34.2263	56.6334	40.0073	59.8842	296.888	99.9499	801.914	249.713	415.591	707.281	154.747	159.309	772.972	3.00438	1.54065e-09	1.07421e-08	46.6399	406.485
LINC01191	16.4726	5.8545	7.1479	9.81311	7.56431	93.3762	64.551	116.55	101.873	102.69	100.071	29.015	27.6645	77.1969	3.00188	1.13427e-23	5.7912e-22	9.37048	79.2208
HIST1H4E	2.53424	4.50346	7.69774	3.77427	4.41252	47.8852	33.3166	38.0054	49.694	43.4921	35.6185	26.8657	35.296	26.0665	3.00096	3.92276e-12	4.06022e-11	4.58445	37.36
IL18RAP	12223.3	5772.98	7117.66	7826.34	3579.18	62969.1	20710.4	45334.1	77018.3	80543.7	123869	81826.6	34274.4	31788.1	2.9908	6.98716e-20	2.16842e-18	7303.89	62037.1
MIR1250	4.43492	1.35104	1.64952	0.754855	1.89108	20.3512	4.16458	13.9353	22.3623	20.5379	44.0991	19.3433	5.72368	13.0332	2.97804	1.062e-08	6.52349e-08	2.01628	18.1723
RGL3	45.6163	10.8083	21.9935	24.1554	48.5377	359.139	214.476	152.022	163.99	353.977	401.98	310.568	97.3026	95.2429	2.97539	7.21137e-10	5.32112e-09	30.2222	238.744
UPK3B	11.4041	8.55657	4.94855	2.26456	1.26072	23.9426	34.3578	59.5418	85.7222	53.157	152.651	50.5076	3.81579	64.1637	2.97383	8.08375e-11	6.88496e-10	5.6869	58.651
PGLYRP1	58.921	14.4111	31.8906	82.2792	73.1217	238.229	788.146	528.275	713.109	216.252	798.872	189.135	144.046	139.355	2.97374	1.20959e-15	2.09233e-14	52.1247	417.269
TIMM10	293.338	282.817	236.98	431.777	306.985	1004.39	1406.59	3417.95	8357.29	2934.51	335.831	578.151	743.125	3735.53	2.96209	2.2284e-05	7.83922e-05	310.38	2501.49
KIF18B	5.06848	4.50346	11.5466	9.05826	6.3036	44.2938	90.5796	35.4717	58.3905	171.552	28.834	8.59704	55.3289	54.1381	2.95655	7.84487e-09	4.91579e-08	7.29608	60.7984
MYBL2	45.6163	58.0946	40.6881	63.4078	34.6698	234.638	290.479	202.696	273.317	1397.79	78.0214	223.523	209.868	424.082	2.95521	1.94826e-07	9.73257e-07	48.4953	370.49
METTL7B	0.63356	1.35104	3.29903	6.03884	15.1286	3.59139	7.28801	67.1429	18.6353	73.6949	11.8728	6.44778	107.796	98.2506	2.9518	0.00264117	0.00617247	5.29022	43.8577
CBS	61.4553	10.8083	6.59806	67.1821	34.0394	150.838	236.34	260.97	460.912	221.085	968.483	192.359	124.013	88.225	2.945	3.06817e-19	8.88318e-18	36.0166	300.358
LPL	9.50339	63.9491	15.3955	30.1942	8.82503	407.025	51.0161	74.744	89.4493	70.0705	120.424	238.568	600.033	11.0281	2.93618	2.24313e-06	9.48647e-06	25.5734	184.706
IL1R1	2513.96	713.798	1425.73	1990.55	2510.72	12773.4	11116.3	8875.53	16871.1	13784.6	30893.1	23579.5	8288.84	3479.88	2.93437	3.50022e-23	1.67035e-21	1830.95	14406.9
LOC100128770	308.544	34.2263	188.595	138.138	190.999	1416.21	1383.68	1746.98	1800.17	1704.65	1404.39	908.062	646.776	613.565	2.92998	6.49946e-21	2.39582e-19	172.1	1291.61
LINC01136	23.4417	9.45726	18.6945	9.81311	18.9108	122.107	78.0858	82.3451	127.962	128.06	200.142	162.269	141.184	61.156	2.92453	2.07334e-21	8.10268e-20	16.0635	122.59
FLT3	404.211	621.027	551.488	549.534	504.918	4810.07	2400.88	2238.52	3426.4	3859.92	5247.79	7556.8	6022.27	195.499	2.9238	4.58801e-08	2.53683e-07	526.236	3973.13
LOC102724190	144.452	101.328	179.797	121.532	210.54	1874.71	1301.43	1013.48	1311.92	941.12	1767.36	912.361	1131.38	153.391	2.92009	1.10465e-12	1.23999e-11	151.53	1156.35
RNF175	740.631	297.228	505.302	668.801	532.654	5335.61	3782.48	3402.75	4523.4	4060.47	8253.31	3833.2	2990.62	1946.97	2.91973	1.88782e-43	1.32798e-40	548.923	4236.53
RNF144A-AS1	34.8458	14.8614	40.6881	21.1359	14.4983	43.0967	65.5921	217.898	371.463	167.928	32.2262	23.6419	50.5592	680.736	2.91728	0.000192092	0.000565906	25.2059	183.682
TRIM6	22.8081	23.418	28.5916	55.1044	20.8019	175.978	90.5796	159.623	554.089	373.307	62.7564	77.3733	165.987	439.12	2.91568	5.99116e-10	4.45886e-09	30.1448	233.201
LOC101929319	2.53424	0.450346	6.59806	12.8325	16.3893	8.37992	9.3703	77.2777	63.3599	59.1975	198.446	7.52241	38.1579	89.2276	2.90753	1.50598e-06	6.56487e-06	7.76091	61.2154
CITED4	8.86983	9.00692	3.29903	11.3228	1.26072	73.025	60.3864	39.2723	86.9646	66.4462	66.1486	36.5374	23.8487	29.0742	2.90564	8.26736e-14	1.09195e-12	6.75187	53.5226
CARD17	113.407	80.6119	86.3247	77.7501	99.5968	108.939	326.919	894.394	2316.98	1090.93	291.732	196.657	367.27	1112.84	2.90396	2.3514e-08	1.36785e-07	91.5381	745.184
USP18	47.517	111.235	152.855	69.4467	70.6003	210.695	174.912	1021.08	1383.98	733.324	113.64	70.9256	604.802	1940.95	2.89521	3.04695e-07	1.47254e-06	90.3309	694.923
ZBTB16	152.688	311.639	407.43	162.294	165.785	2140.47	1728.3	220.431	554.089	2698.92	4445.53	3675.23	1194.34	126.322	2.89104	2.42492e-05	8.47872e-05	239.967	1864.85
C5orf47	6.96916	5.8545	12.6463	13.5874	6.3036	110.136	21.864	98.8141	55.9058	107.522	47.4913	36.5374	33.3881	94.2404	2.88455	1.73625e-09	1.19945e-08	9.07218	67.3221
RCVRN	11.4041	13.06	13.746	12.0777	5.67324	84.9963	194.694	115.283	80.7528	28.9947	88.1981	56.9554	28.6184	81.2071	2.88068	1.04027e-10	8.72693e-10	11.1922	84.4111
SLED1	483.406	77.4595	185.845	354.027	322.744	2085.4	782.941	2670.51	2931.95	2135.94	3736.55	1668.9	221.316	3028.73	2.87973	5.16407e-20	1.64015e-18	284.696	2140.25
AZU1	8.86983	1.35104	3.29903	27.9296	8.19467	31.1254	142.637	96.2804	245.985	21.746	76.3253	20.418	10.4934	13.0332	2.87236	0.000982502	0.00251491	9.92884	73.116
RASGEF1A	237.585	232.829	169.9	259.67	334.091	1514.37	1289.98	1378.33	2135.6	1710.69	3775.56	1829.02	2416.35	537.371	2.87228	3.94774e-17	8.61833e-16	246.815	1843.03
NWD1	0.63356	9.90761	3.29903	2.26456	1.89108	22.7455	43.7281	19.0027	37.2705	10.873	47.4913	11.8209	38.1579	5.01279	2.87176	1.14866e-05	4.27858e-05	3.59917	26.2336
FAM169B	5.70204	3.15242	6.59806	15.852	11.9768	126.896	58.3041	135.553	34.7858	62.8219	96.6787	47.2837	11.4474	21.0537	2.87031	8.28414e-13	9.46126e-12	8.65626	66.0915
INSC	29.7773	4.95381	6.59806	16.6068	19.5411	113.727	77.0447	195.094	125.477	65.2381	128.905	128.956	30.5263	112.286	2.86428	2.82936e-14	3.95423e-13	15.4954	108.584
CD163	4707.98	5566.28	6750.92	7509.3	5816.96	47777.5	18969.7	22172.4	49372.3	39250.4	40886.6	34464.5	180116	12692.4	2.86345	3.86496e-11	3.43989e-10	6070.29	49522.4
HIST1H2BF	13.9383	22.5173	27.4919	33.2136	63.6663	264.566	167.624	187.493	531.726	246.455	196.75	113.911	162.171	248.634	2.86008	3.79221e-14	5.21545e-13	32.1655	235.481
LOC284648	1.90068	1.35104	4.94855	1.50971	2.52144	14.3656	13.5349	64.6092	44.7246	32.619	5.08835	2.14926	7.63158	18.046	2.85794	8.4375e-06	3.22571e-05	2.44628	22.5298
SLC22A1	158.39	35.5773	142.408	186.449	123.55	1496.41	682.991	1565.82	1182.72	1051.06	1017.67	603.942	367.27	597.524	2.85352	3.80734e-21	1.44049e-19	129.275	951.712
COX6B2	1.26712	2.25173	1.09968	5.28398	1.26072	14.3656	1.04114	27.8706	37.2705	10.873	33.9224	7.52241	13.3553	19.0486	2.85076	3.53105e-06	1.44413e-05	2.23265	18.3633
SPATS2L	141.917	208.961	293.614	179.655	191.629	221.469	371.689	1972.48	3773.02	1512.56	132.297	463.165	710.69	3996.19	2.84787	5.41847e-05	0.000177314	203.155	1461.51
WFDC12	2.53424	2.70208	2.19935	1.50971	2.52144	29.9283	14.576	27.8706	23.6047	26.5785	22.0495	12.8956	2.86184	8.02046	2.84448	9.72112e-10	6.99368e-09	2.29336	18.7095
AGRN	5.70204	6.75519	14.8456	8.3034	12.6072	20.3512	30.1932	143.154	136.659	44.7002	16.9612	27.9404	27.6645	183.468	2.84339	4.92223e-06	1.96445e-05	9.64269	70.1212
TNNT3	162.191	64.3995	73.1285	70.9564	89.5111	1028.34	462.268	1071.75	1326.83	664.462	259.506	226.747	586.677	574.465	2.84327	3.04201e-12	3.1798e-11	92.0373	689.005
OAS1	1094.16	1355.54	2281.28	1696.16	1513.49	5253.01	5795.01	22865.3	33502.5	12752.8	3599.16	1289.56	11604.8	19258.1	2.83789	8.43237e-06	3.22505e-05	1588.13	12880
INSL3	21.541	19.8152	15.9453	51.3301	14.4983	268.157	162.419	249.569	318.042	86.9841	193.357	127.881	72.5	155.396	2.83226	7.08538e-16	1.27615e-14	24.626	181.589
FCGR1A	900.288	238.683	564.684	710.318	685.201	1221.07	1623.14	9697.71	11512.9	4299.67	2827.43	1263.76	3924.54	6855.49	2.83144	5.75845e-12	5.83931e-11	619.835	4802.85
CLEC4E	7030.61	1940.54	6733.32	4797.1	6860.83	37935.9	30583.6	26344.1	38586.2	47524.7	62515.5	32529	60076.7	15955.7	2.83136	6.61594e-17	1.39309e-15	5472.48	39116.8
ANKRD2	5.06848	1.35104	0.549839	3.77427	6.93395	16.7598	21.864	25.3369	39.7552	28.9947	44.0991	13.9702	12.4013	24.0614	2.82945	7.27201e-13	8.37075e-12	3.53552	25.2492
SLC5A9	151.421	97.7251	104.469	88.318	148.134	1310.86	588.247	658.76	1341.74	828.765	1207.64	1229.38	426.414	188.481	2.80855	4.43061e-16	8.25815e-15	118.014	864.475
SPINK8	58.2875	3.15242	5.49839	31.7039	20.1715	178.373	74.9624	258.437	228.593	129.268	361.273	70.9256	164.079	40.1023	2.80692	2.20838e-10	1.7668e-09	23.7627	167.335
LOC441081	1274.72	537.713	84.1253	615.207	29.6269	890.665	2010.45	1052.75	11767.5	2802.82	463.04	4591.89	334.835	6928.67	2.80618	0.000826811	0.00215384	508.279	3426.96
HIST1H4C	2.53424	3.60277	4.39871	6.79369	3.78216	20.3512	31.2343	27.8706	29.8164	22.9541	22.0495	81.6719	12.4013	32.0818	2.79867	4.81494e-11	4.21041e-10	4.22231	31.159
MMP25	12371.5	1879.29	4981.54	7892.01	8020.06	27514.9	77736	101276	55202.6	82149.2	55875.2	20615.7	14538.2	17302.1	2.79548	5.63082e-11	4.88785e-10	7028.88	50245.5
LOC388813	8.86983	4.05311	7.69774	5.28398	8.19467	16.7598	15.6172	21.5364	37.2705	55.5732	147.562	104.239	30.5263	51.1304	2.79405	3.8181e-11	3.40296e-10	6.81987	53.3572
HERC5	1156.25	927.262	2300.52	1409.31	1251.26	3951.73	4483.17	18261.6	22031.9	11925.3	3412.59	2078.33	3911.18	22085.3	2.79175	2.82597e-08	1.62352e-07	1408.92	10237.9
OASL	501.146	294.076	1386.69	812.979	985.882	2800.09	3355.61	9089.63	12316.7	6744.89	4423.48	1672.12	3203.35	9271.65	2.78361	6.57251e-13	7.63029e-12	796.155	5875.28
TMEM119	102.003	54.0415	108.868	135.119	119.138	930.171	1032.82	1360.59	1124.33	676.543	1048.2	241.792	235.625	357.913	2.78181	7.96557e-23	3.64554e-21	103.834	778.665
A3GALT2	86.7977	22.9676	69.8295	85.2986	47.9073	489.627	351.907	273.639	639.811	437.337	754.773	580.3	156.447	326.834	2.78124	2.17147e-27	1.77007e-25	62.5601	445.63
FGFR4	3.80136	2.70208	3.29903	11.3228	3.1518	31.1254	36.4401	72.2103	60.8752	30.2028	28.834	18.2687	0.953947	34.0869	2.76039	6.43556e-07	2.96449e-06	4.85542	34.7775
GLIS2	5.70204	6.30484	9.34726	3.77427	7.56431	53.8709	30.1932	41.806	72.0564	47.1164	96.6787	35.4628	28.6184	29.0742	2.75858	3.53967e-11	3.16819e-10	6.53854	48.3197
IFI6	428.286	485.923	1526.9	852.986	714.197	2084.2	2696.56	10698.5	13166.4	6550.39	1735.13	1020.9	3207.17	10980	2.75465	3.57861e-07	1.70347e-06	801.659	5793.26
FUT7	49.4177	20.7159	18.1447	36.233	31.518	156.824	143.678	420.593	385.129	213.836	437.598	136.478	93.4868	167.427	2.75361	1.2357e-21	4.98296e-20	31.2058	239.45
LINC01305	5.06848	0.900692	2.74919	9.81311	1.89108	63.4479	5.20572	55.7413	39.7552	24.1623	54.2758	4.29852	6.67763	19.0486	2.7527	1.12217e-05	4.18814e-05	4.08451	30.2903
C3AR1	1040.3	1174.5	1308.07	1871.29	378.846	7592.2	1718.93	12169.3	26202.4	6445.28	10076.6	2981.02	11244.2	4337.06	2.75002	4.79424e-08	2.63323e-07	1154.6	9196.34
POU5F1	43.7156	49.5381	32.9903	45.2913	59.2538	313.648	215.517	305.31	622.418	386.596	254.418	335.285	119.243	338.864	2.7495	4.84734e-17	1.04264e-15	46.1578	321.255
LOC101927131	69.058	21.1663	40.6881	61.8981	43.4948	318.437	154.089	288.841	354.07	411.966	702.193	297.672	127.829	332.849	2.74833	3.50916e-46	3.33247e-43	47.261	331.994
FLT1	178.03	45.4849	87.4243	73.9758	32.7787	897.848	396.676	362.318	192.564	218.668	4667.72	974.689	158.355	77.1969	2.74809	2.8282e-05	9.74883e-05	83.5388	882.893
HSPA1B	46.8834	26.5704	19.2443	64.1627	35.3001	958.902	72.8801	235.634	201.261	79.7354	481.698	65.5524	138.322	153.391	2.73514	4.25769e-08	2.36382e-07	38.4322	265.264
MAOB	22.8081	3.60277	1.64952	10.568	22.0626	216.681	51.0161	29.1375	33.5435	142.557	89.8943	29.015	26.7105	35.0895	2.73304	8.00881e-05	0.000253688	12.1382	72.6271
LINC00640	2.53424	0.450346	4.94855	3.77427	1.89108	17.957	8.32916	34.2049	19.8776	20.5379	5.08835	13.9702	22.8947	19.0486	2.73252	6.75376e-08	3.64105e-07	2.7197	17.9898
JCHAIN	3516.26	3074.96	7519.04	3873.16	2036.06	46664.2	4238.5	9189.71	3586.67	83977.1	6068.71	6685.27	20655.8	35902.6	2.73209	0.000472158	0.00129236	4003.9	24107.6
RPL23AP87	14.5719	15.7621	1.64952	12.0777	6.93395	95.7705	27.0698	115.283	48.4517	27.7866	206.926	36.5374	86.8092	55.1406	2.7306	4.03597e-08	2.25457e-07	10.199	77.7528
CENPM	4.43492	2.70208	3.84887	1.50971	0.63036	10.7742	35.3989	6.33424	22.3623	45.9083	11.8728	5.37315	8.58552	16.0409	2.7278	4.69433e-06	1.88179e-05	2.62519	18.0723
NTSR1	17.7397	12.1593	13.746	19.6262	7.56431	81.4049	118.69	91.213	114.296	134.1	64.4525	83.8211	58.1908	93.2378	2.72283	9.75733e-13	1.10179e-11	14.1671	93.2675
SEPT4	93.7668	51.3394	37.389	64.9175	98.3361	284.917	189.488	622.022	1321.86	512.24	217.103	72.0002	212.73	744.9	2.72058	9.7774e-08	5.11576e-07	69.1498	464.14
OAS3	2339.1	2847.09	5913.51	3776.54	3060.4	8379.92	7727.37	36942.5	61488.9	32685.5	5721.01	2772.55	9839.96	59494.8	2.71696	2.36741e-05	8.28833e-05	3587.33	25005.8
LOC100506159	2.53424	4.05311	6.59806	34.7233	7.56431	80.2078	127.02	7.60108	13.6659	78.5273	123.817	32.2389	16.2171	394.005	2.70604	0.00023162	0.000671216	11.0946	97.0333
KLHDC8B	250.256	113.487	131.411	95.8666	187.847	1245.02	2033.36	644.825	1196.38	1802.5	922.688	222.448	486.513	609.555	2.69955	1.6589e-12	1.81494e-11	155.774	1018.14
PLIN4	479.605	98.6258	172.649	485.372	380.107	1863.93	639.263	2778.2	3741.96	1992.18	4462.49	1868.78	943.454	1265.23	2.69635	3.89415e-27	3.05627e-25	323.272	2172.83
PPARG	7.60272	20.7159	18.1447	20.3811	8.82503	68.2365	62.4687	43.0728	190.08	43.4921	145.866	69.8509	248.98	44.1125	2.69338	1.4236e-08	8.57001e-08	15.1339	101.795
DOCK6	4.43492	5.40415	9.34726	9.81311	11.9768	69.4336	39.5635	64.6092	109.327	56.7813	106.855	23.6419	23.8487	38.0972	2.69053	1.10793e-16	2.26898e-15	8.19525	59.1286
CAV1	8.86983	13.9607	20.344	5.28398	23.3233	172.387	55.1807	63.3424	59.6328	282.698	15.2651	6.44778	23.8487	71.1816	2.68735	0.000179662	0.000533508	14.3564	83.3316
SPATC1	6.96916	5.8545	8.79742	12.8325	5.04288	21.5484	33.3166	60.8087	49.694	48.3245	50.8835	44.0598	82.9934	61.156	2.68498	7.26919e-10	5.35962e-09	7.8993	50.3094
BCL6	22063.1	4865.09	11515.8	19948.6	16759.4	77601.6	67001.8	135936	173738	71572.2	122967	87723.1	51848.9	67421	2.6841	3.43696e-33	6.46319e-31	15030.4	95090
MAP1LC3B2	48.1505	13.9607	35.1897	46.0462	44.7555	215.484	157.213	252.103	613.721	212.628	317.174	142.926	162.171	151.386	2.68067	3.88477e-23	1.83999e-21	37.6205	247.201
SMARCD3	632.926	626.431	574.581	815.243	629.099	5233.86	2792.35	5936.45	7180.79	4730.97	5936.41	3924.55	2049.08	3123.97	2.67891	2.06945e-30	2.60299e-28	655.656	4545.38
BAMBI	9.50339	9.90761	12.6463	7.54855	21.4322	35.9139	58.3041	63.3424	258.409	149.806	42.403	16.1194	109.704	59.1509	2.67858	2.11682e-07	1.05386e-06	12.2076	88.1281
MIR4772	277.499	125.196	188.045	150.216	77.5342	955.31	184.283	544.744	1206.32	1626.12	2242.27	2641.44	425.46	736.88	2.67853	6.11759e-11	5.27663e-10	163.698	1173.65
AIRN	5.70204	2.70208	1.64952	9.81311	2.52144	25.1397	23.9463	26.6038	39.7552	31.4109	71.237	16.1194	13.3553	23.0588	2.67623	1.19321e-11	1.14747e-10	4.47764	30.0696
LOC285847	74.76	69.8036	59.3826	62.653	42.2341	312.451	251.957	126.685	337.919	357.601	780.214	1019.82	438.816	117.299	2.67175	3.85064e-11	3.43035e-10	61.7667	415.863
AANAT	34.8458	35.127	37.389	39.2525	54.2109	126.896	135.349	182.426	537.938	240.414	145.866	290.15	181.25	411.048	2.66514	2.42568e-10	1.92283e-09	40.165	250.149
FCGR1B	993.422	237.783	710.391	892.239	741.933	1861.54	1441.98	6987.93	9344.96	4983.46	3609.34	1519.53	4119.14	8035.5	2.66454	1.84399e-12	2.0036e-11	715.153	4655.93
NSUN7	982.017	202.656	240.829	605.394	345.437	2984.45	1147.34	4967.31	3876.13	2875.31	9545.75	1723.71	2383.91	900.296	2.6591	1.37092e-16	2.75716e-15	475.267	3378.25
TP73	5.70204	5.40415	2.19935	1.50971	6.3036	19.1541	20.8229	15.2022	17.3929	64.03	8.48059	65.5524	6.67763	22.0563	2.65794	1.85416e-05	6.62827e-05	4.22377	26.5965
MX1	2317.56	2060.78	5742.51	3550.08	1960.42	6926.6	9715.96	30391.7	49654.3	27342	6667.44	6171.6	11774.6	37694.1	2.65367	3.11628e-07	1.50337e-06	3126.27	20704.3
HECW2	608.217	117.54	291.964	246.838	362.457	2251.8	1244.17	1555.69	1662.27	2544.29	2216.83	4554.28	1750.49	539.376	2.65086	7.18097e-12	7.17832e-11	325.403	2035.47
LOC285696	49.4177	8.55657	22.5434	52.085	26.4751	92.1791	78.0858	286.307	217.411	245.247	256.114	159.045	191.743	181.463	2.64262	4.69929e-15	7.43781e-14	31.8155	189.733
HMGB2	6051.13	3639.7	4927.1	6761.24	6710.18	42628.6	35228.2	30619.7	41428.7	37277.5	58292.2	29285.8	36214.7	8839.55	2.63923	6.24972e-17	1.32184e-15	5617.87	35535
MIR5192	3.80136	0.900692	1.64952	2.26456	3.1518	14.3656	9.3703	12.6685	22.3623	7.24868	8.48059	26.8657	7.63158	20.0511	2.63887	1.00931e-08	6.22195e-08	2.35359	14.3383
HIST1H2BO	20.9075	60.7967	42.3376	10.568	57.9931	286.114	93.703	879.192	175.171	345.52	115.336	42.9852	181.25	183.468	2.63872	0.000326878	0.000920444	38.5206	255.86
DRC7	13.9383	5.40415	14.8456	11.3228	13.8679	46.6881	37.4812	263.504	29.8164	21.746	37.3146	120.359	16.2171	105.269	2.63752	5.0562e-06	2.01199e-05	11.8758	75.3772
EDN1	48.1505	25.6697	37.9389	42.2719	21.4322	104.15	198.859	133.019	278.287	512.24	693.712	123.582	64.8684	187.478	2.63505	1.08642e-13	1.40753e-12	35.0926	255.133
LOC102724323	139.383	68.0022	124.813	153.99	122.29	817.64	452.898	818.383	1063.45	631.843	1367.07	819.943	583.816	453.156	2.63341	2.93486e-43	1.99078e-40	121.696	778.689
CFAP58-AS1	248.355	68.9029	132.511	257.406	272.946	1416.21	1052.6	1548.09	1729.35	942.328	1662.2	581.375	720.23	1107.83	2.62903	7.20145e-32	1.10304e-29	196.024	1195.58
IGSF9	5.06848	1.80138	1.09968	0.754855	3.78216	23.9426	12.4937	8.86793	8.69646	12.0811	27.1379	20.418	4.76973	29.0742	2.62729	1.11457e-08	6.82655e-08	2.50131	16.3868
LINC01127	961.744	262.101	186.945	646.156	364.348	2397.85	2363.4	870.324	4419.04	2236.22	6597.9	4213.62	3321.64	446.138	2.62656	3.38566e-09	2.24368e-08	484.259	2985.13
BMX	511.283	37.3787	144.058	351.008	443.773	1048.69	967.223	1603.83	2918.28	1512.56	2718.88	1725.86	2128.26	806.056	2.62571	1.10342e-10	9.23229e-10	297.5	1714.4
ASPH	3458.6	1122.26	1513.71	3109.25	1614.98	16060.7	6301.01	6055.53	16171.7	14276.3	34168.3	16853.4	10857.8	3184.12	2.62449	1.61458e-10	1.31669e-09	2163.76	13769.9
KCNJ15	10577.9	1714.02	3205.01	10484.9	6064.06	21276.6	20932.2	49176.5	71754.5	55793.1	52835.8	19662.5	30325	30907.8	2.62376	3.50057e-21	1.33475e-19	6409.19	39184.9
UBE2C	46.8834	19.3649	32.9903	51.3301	44.7555	232.243	251.957	225.499	330.465	343.104	215.407	124.657	212.73	219.56	2.61863	9.41689e-21	3.37462e-19	39.0649	239.514
TMEM88	30.4109	10.8083	29.6913	13.5874	17.6501	129.29	105.156	159.623	244.743	106.314	203.534	87.045	69.6381	107.274	2.61652	6.19778e-30	6.92438e-28	20.4296	134.735
TMED11P	11.4041	4.50346	10.9968	4.52913	3.78216	45.491	106.197	41.806	8.69646	48.3245	108.552	46.2091	7.63158	7.0179	2.61588	4.06549e-06	1.64674e-05	7.04312	46.6583
CDC25A	21.541	10.358	19.2443	31.7039	24.584	68.2365	114.526	78.5445	98.1457	433.712	62.7564	20.418	80.1315	228.583	2.61583	5.38599e-06	2.13606e-05	21.4863	131.673
TGFA-IT1	8.23628	0.900692	1.09968	5.28398	1.26072	10.7742	17.6995	21.5364	29.8164	28.9947	35.6185	10.7463	17.171	12.0307	2.59837	3.45182e-10	2.66614e-09	3.35627	20.4875
REM2	677.909	258.499	423.376	615.962	528.241	3239.44	3318.13	4333.88	4253.81	2793.16	4508.28	2458.75	1102.76	2134.44	2.59598	2.46444e-50	5.20078e-47	500.797	3126.96
CLEC18A	29.7773	22.0669	30.2411	13.5874	10.0858	141.261	184.283	264.771	176.414	175.176	186.573	21.4926	41.9737	147.376	2.59574	1.25937e-09	8.8787e-09	21.1517	148.813
MGAM2	613.919	140.508	370.591	470.275	764.626	1741.83	838.121	2158.71	4364.38	3363.39	3083.54	4515.59	1537.76	3058.8	2.59488	2.21711e-14	3.1425e-13	471.984	2740.24
NLRP6	273.064	97.7251	136.36	214.379	176.501	1517.96	974.511	898.195	1140.48	1103.01	3392.24	1492.66	245.164	514.312	2.58662	2.62185e-30	3.23356e-28	179.606	1253.17
C5orf67	71.5922	30.1732	32.4405	24.9102	34.6698	204.709	146.801	385.122	354.07	239.206	390.107	192.359	82.0394	270.69	2.57713	6.94171e-23	3.20788e-21	38.7572	251.678
PSTPIP2	2959.99	1976.12	2512.76	3347.03	3808	7290.53	8207.34	20659.7	35025.6	19540	24897.3	11696.3	16270.5	16714.6	2.57683	8.39129e-13	9.56354e-12	2920.78	17811.3
MARC1	1546.52	566.986	814.311	1163.99	1153.56	5855.17	4816.33	5931.38	11957.6	7107.33	8875.79	4475.83	7642.07	1782.55	2.5762	1.4245e-17	3.27154e-16	1049.07	6493.79
COL18A1	320.581	58.9953	173.199	249.102	226.299	1149.25	1413.87	1311.19	1703.26	1273.35	2276.19	781.256	588.585	727.857	2.57334	1.08255e-17	2.51356e-16	205.635	1247.2
LOC151475	32.9451	9.90761	10.4469	9.05826	17.6501	180.767	41.6458	110.216	94.4187	146.182	83.1098	73.0748	111.612	24.0614	2.56821	7.56247e-10	5.55429e-09	16.0016	96.1207
HIST1H4K	3.80136	3.15242	4.39871	0.754855	1.26072	13.1684	22.9052	12.6685	39.7552	13.2892	6.78447	15.0448	7.63158	16.0409	2.56813	4.11857e-08	2.29598e-07	2.67361	16.3654
MIR616	192.602	49.0877	107.768	140.403	120.399	940.945	452.898	799.38	1100.72	782.857	910.815	779.107	249.934	493.258	2.5661	1.46e-28	1.37889e-26	122.052	723.324
ANXA3	5058.97	779.098	920.43	4436.28	2883.89	7344.4	7908.53	25931.1	26163.9	14220.7	25012.7	8937.7	10531.6	17048.5	2.56513	7.03957e-14	9.33677e-13	2815.74	15899.9
FBXO6	150.787	187.344	218.286	190.223	269.794	436.953	606.987	2572.97	3669.9	1384.5	508.835	368.598	795.592	1930.93	2.56277	2.32621e-09	1.57735e-08	203.287	1363.92
SUMO1P1	235.684	41.8822	107.768	204.566	201.715	1132.49	676.744	1187.04	778.954	922.998	1470.53	926.331	621.019	421.074	2.56079	7.33347e-24	3.86902e-22	158.323	904.131
PRSS58	2.53424	2.25173	0.549839	2.26456	0.63036	7.18279	4.16458	12.6685	26.0894	13.2892	15.2651	23.6419	0.953947	3.00767	2.55638	0.000141856	0.000430601	1.64615	11.807
TOB1-AS1	5.70204	4.05311	6.59806	3.01942	3.78216	17.957	31.2343	10.1348	19.8776	20.5379	50.8835	51.5822	32.4342	18.046	2.55478	5.96538e-12	6.03513e-11	4.63096	28.0764
ZDHHC12	8.23628	9.00692	9.89709	6.79369	9.45539	19.1541	63.5098	87.4124	136.659	79.7354	69.5408	27.9404	18.125	38.0972	2.554	9.13535e-10	6.6099e-09	8.67787	60.0193
MMP19	8.23628	18.0138	24.1929	13.5874	15.759	106.545	35.3989	101.348	161.506	144.974	162.827	19.3433	257.566	32.0818	2.55138	9.19467e-11	7.76843e-10	15.9579	113.51
SEMA3B	19.0068	13.5104	26.3923	9.05826	33.4091	166.401	69.7567	107.682	168.96	131.684	222.191	60.1793	18.125	221.565	2.5495	8.09308e-11	6.88982e-10	20.2753	129.616
TRPV5	130.513	22.5173	69.8295	116.248	44.1252	350.759	224.887	310.378	263.378	813.06	898.943	759.763	242.303	206.527	2.54202	1.02776e-09	7.36457e-09	76.6466	452.222
CACNA1E	438.423	53.5912	257.324	372.898	525.72	1278.54	856.862	3947.5	2710.81	1730.02	2293.15	762.987	663.947	2492.36	2.53938	2.21322e-14	3.14167e-13	329.591	1859.57
MYBPC3	177.397	88.7181	177.048	203.811	274.206	559.06	878.726	981.806	2030	1319.26	1119.44	929.555	635.329	1209.08	2.53909	1.8175e-17	4.11931e-16	184.236	1073.58
UBQLNL	27.8766	36.0277	25.8424	21.8908	26.4751	76.6164	124.937	201.429	376.432	163.095	106.855	122.508	32.4342	284.726	2.53691	1.69822e-09	1.17673e-08	27.6225	165.448
LOC339874	39.9143	46.3856	42.3376	41.517	72.4913	332.802	289.438	197.628	267.105	287.531	444.383	207.404	447.401	82.2097	2.5366	1.56167e-12	1.71947e-11	48.5292	283.989
RGS16	8.86983	5.40415	18.1447	9.05826	13.8679	52.6738	34.3578	59.5418	103.115	175.176	32.2262	35.4628	45.7895	61.156	2.53385	1.11483e-09	7.94521e-09	11.069	66.611
DHRS9	848.336	219.318	682.899	335.156	536.436	1886.68	2558.09	1436.6	6004.28	2238.63	4270.83	1738.75	5667.4	2404.13	2.53349	2.8482e-10	2.23629e-09	524.429	3133.93
PRRT4	3.80136	4.95381	3.84887	41.517	13.2375	56.2652	140.554	111.483	193.807	26.5785	89.8943	26.8657	30.5263	15.0384	2.5319	6.66581e-05	0.000214433	13.4717	76.7791
TACSTD2	11.4041	5.40415	7.1479	52.085	17.6501	55.068	186.365	86.1456	181.383	73.6949	142.474	29.015	153.585	39.0997	2.52963	1.37854e-06	6.05379e-06	18.7382	105.203
MOCS1	6.96916	16.6628	12.6463	9.05826	3.1518	80.2078	46.8515	8.86793	67.087	60.4056	284.948	182.687	10.4934	13.0332	2.52864	0.000143807	0.000435896	9.69766	83.8424
B3GNT8	24.0753	11.2586	15.3955	24.1554	37.8216	93.3762	96.8264	130.485	320.527	114.771	262.898	63.4032	111.612	75.1918	2.52836	3.55627e-15	5.71924e-14	22.5413	141.01
S100P	4699.11	1045.25	3412.85	6367.2	4096.71	33433.5	30349.4	34676.1	6737.27	10656.8	41537.9	21716.1	13111	7741.75	2.52785	5.89196e-11	5.10287e-10	3924.22	22217.8
PPP4R1-AS1	1.26712	0.450346	7.69774	3.77427	1.26072	22.7455	18.7406	17.7359	26.0894	15.7055	22.0495	10.7463	6.67763	15.0384	2.52701	5.75115e-07	2.66809e-06	2.89004	17.281
HLX	195.77	39.6304	75.8777	154.745	122.92	435.756	411.252	1100.89	1256.02	793.73	681.84	360.001	445.493	766.956	2.52405	1.90814e-21	7.50337e-20	117.789	694.659
ADGB	12.0376	4.50346	3.29903	3.77427	3.1518	52.6738	1.04114	38.0054	37.2705	26.5785	66.1486	19.3433	42.9276	7.0179	2.51577	7.80412e-06	3.00474e-05	5.35324	32.3341
CNGA4	16.4726	19.8152	14.2958	23.4005	9.45539	101.756	58.3041	49.407	163.99	113.563	100.071	73.0748	165.033	50.1279	2.51567	6.17996e-11	5.32559e-10	16.6879	97.2585
ZNF396	57.0204	29.2725	43.4372	68.6918	46.6466	351.956	142.637	326.847	326.738	263.369	254.418	152.597	427.368	319.816	2.51561	4.5961e-24	2.49411e-22	49.0137	285.083
CD274	484.04	243.637	440.421	471.784	504.918	535.118	527.86	7484.53	6367.05	1714.31	676.751	413.732	1919.34	5535.12	2.51376	1.57318e-06	6.83582e-06	428.96	2797.09
XAF1	3159.56	3573.95	6422.66	3916.94	3860.32	7601.78	9026.72	34216.3	45128.4	35663.5	5346.16	4210.4	20299	63064.9	2.51356	1.20159e-06	5.31112e-06	4186.69	24950.8
NRN1	40.5478	5.40415	3.84887	17.3617	46.0162	7.18279	206.147	292.642	514.333	100.273	64.4525	21.4926	145.954	74.1892	2.50829	0.000123376	0.000378191	22.6357	158.518
JUNB	191.335	145.912	193.543	188.714	172.088	705.11	1035.94	1420.14	1586.48	579.894	1923.4	944.6	304.309	1487.79	2.50816	3.1313e-20	1.03611e-18	178.318	1109.74
PEX11G	6.3356	4.95381	10.9968	3.77427	5.67324	61.0537	10.4114	22.8032	16.1506	12.0811	83.1098	61.2539	52.4671	11.0281	2.50354	5.22937e-06	2.07785e-05	6.34674	36.7066
LINC00639	113.407	52.6905	12.0964	16.6068	13.2375	228.652	276.944	326.847	195.049	421.631	1350.11	139.702	58.1908	115.294	2.50184	1.51193e-06	6.58777e-06	41.6077	345.824
UBTD1	12.0376	4.95381	6.04822	5.28398	16.3893	45.491	59.3452	87.4124	89.4493	41.0758	74.6292	34.3882	23.8487	31.0793	2.50157	3.34353e-11	2.9997e-10	8.9426	54.0799
C17orf53	31.0444	38.7297	43.4372	38.4976	46.0162	329.211	111.402	73.4771	140.386	138.933	364.665	842.51	248.98	72.1841	2.50001	1.78351e-09	1.23045e-08	39.5451	257.972
RAP1GAP	28.5102	6.75519	8.24758	21.8908	20.8019	43.0967	69.7567	125.418	122.993	37.4515	269.683	74.1495	37.2039	134.343	2.49954	7.72613e-11	6.6011e-10	17.2411	101.566
ADM	900.288	191.397	436.572	1359.49	679.528	2181.17	1268.11	7616.28	6537.25	1975.26	3809.48	3223.89	924.375	6379.27	2.49948	4.69135e-09	3.03174e-08	713.456	3768.34
LINC01271	62.7224	43.2332	54.9839	77.7501	62.4056	462.093	232.175	245.768	672.112	401.093	702.193	235.344	231.809	153.391	2.49854	3.45563e-16	6.56985e-15	60.219	370.664
CFAP54	45.6163	13.5104	37.9389	27.1748	49.168	323.225	232.175	178.625	121.75	217.46	373.146	166.568	79.1776	108.276	2.49599	5.46866e-19	1.52745e-17	34.6817	200.045
GIF	15.839	5.8545	6.59806	9.81311	17.6501	90.982	44.7692	95.0135	90.6916	62.8219	78.0214	41.9106	15.2632	65.1662	2.49478	8.00691e-18	1.89034e-16	11.1509	64.9599
SLC22A18	14.5719	16.6628	12.0964	7.54855	12.6072	68.2365	138.472	198.895	99.3881	88.1922	66.1486	29.015	27.6645	32.0818	2.49257	1.08896e-06	4.84823e-06	12.6974	83.1215
LOC100131635	49.4177	13.5104	24.7427	40.0073	33.4091	149.641	85.3738	217.898	176.414	123.227	203.534	212.777	177.434	226.578	2.49186	8.08991e-19	2.22683e-17	32.2174	174.764
FOLR3	70.3251	92.7713	676.301	177.391	110.943	689.547	4021.94	1678.57	1155.39	1251.6	785.303	332.061	1681.81	353.903	2.48696	0.000169411	0.000505917	225.546	1327.79
MIR6513	0.63356	0.450346	0.549839	1.50971	1.26072	8.37992	2.08229	5.06739	4.9694	4.83245	1.69612	3.22389	7.63158	4.01023	2.48582	0.000751865	0.00197923	0.880835	4.65481
LINC00398	10.7705	9.00692	8.79742	5.28398	1.89108	55.068	46.8515	49.407	53.4211	44.7002	33.9224	34.3882	31.4802	22.0563	2.48521	1.68781e-14	2.44434e-13	7.14998	41.255
MYBPHL	4.43492	3.15242	2.19935	5.28398	3.1518	27.534	9.3703	15.2022	45.967	10.873	61.0603	36.5374	4.76973	17.0435	2.48494	4.27857e-08	2.37333e-07	3.6445	25.373
ABCB11	13.9383	0.900692	3.84887	12.8325	9.45539	77.8135	26.0286	8.86793	73.2987	18.1217	44.0991	33.3135	90.625	23.0588	2.48318	9.64225e-06	3.65029e-05	8.19516	43.9141
CEACAM1	1187.29	367.032	958.369	1487.06	1180.66	3739.84	4468.59	8237.04	14449.8	5568.19	3242.98	2023.53	3790.03	7422.93	2.4823	1.85417e-11	1.72713e-10	1036.08	5882.55
PDLIM7	782.446	290.923	478.36	720.132	910.239	3670.4	3206.72	5107.93	5968.25	3143.51	5955.07	2355.59	1648.42	2396.11	2.48073	7.85759e-35	1.96367e-32	636.42	3716.89
TUFT1	252.157	109.884	246.878	178.146	208.019	1737.04	905.796	1124.96	1345.47	826.349	1957.32	639.405	476.973	1368.49	2.47646	7.53248e-25	4.45683e-23	199.017	1153.53
SIPA1L2	2397.39	650.299	1289.37	2208.71	1577.16	6300.5	7157.87	5938.98	10055.6	10132.4	18472.4	9722.18	6671.9	6757.24	2.47635	2.07557e-25	1.29675e-23	1624.59	9023.24
PHC2	7572.3	2378.73	4304.69	6084.89	6756.82	31385.2	29753.8	29093.1	44011.5	33980.6	51360.2	29255.7	16756.1	10317.3	2.47198	6.70959e-26	4.50301e-24	5419.49	30657.1
DDAH2	281.3	264.353	225.434	271.748	268.533	1513.17	840.204	2448.82	3056.18	1199.66	1796.19	959.644	791.776	1674.27	2.46936	2.61731e-30	3.23356e-28	262.274	1586.66
SAP25	31.0444	23.8683	31.3408	21.8908	37.8216	181.964	252.998	252.103	236.047	119.603	315.478	102.09	40.0658	116.297	2.46722	4.43586e-10	3.36866e-09	29.1932	179.627
GADD45B	1434.38	645.796	880.841	1834.3	1183.82	6322.05	3724.17	7528.87	6618	4672.98	7776.7	2654.34	1448.09	16937.2	2.46529	1.13737e-09	8.08459e-09	1195.83	6409.16
FN1	102.003	149.064	97.3214	153.236	112.204	1131.29	103.073	510.539	2443.7	315.317	127.209	144	3279.67	420.071	2.46224	6.41016e-06	2.50253e-05	122.766	941.653
SEMA3B-AS1	5.70204	3.15242	6.59806	3.01942	13.8679	61.0537	13.5349	34.2049	38.5129	42.2839	50.8835	21.4926	20.0329	45.1151	2.46196	5.71806e-12	5.80144e-11	6.46797	36.346
NFKBIA	12018	8844.79	11628.5	15409.6	11388.7	30753.1	45742.7	81669.8	79669.5	61242.9	219505	30530.2	10544.9	150659	2.45997	4.08137e-10	3.12193e-09	11857.9	78924.1
GUCY2D	10.7705	7.65588	13.746	24.1554	19.5411	118.516	42.6869	31.6712	50.9364	68.8624	139.082	122.508	178.388	13.0332	2.45984	5.32643e-05	0.000174482	15.1738	85.076
LINC01270	184.999	76.5588	200.691	232.495	263.49	1448.53	917.248	676.496	1887.13	1179.12	1713.08	678.091	664.901	420.071	2.45421	3.6953e-16	6.9975e-15	191.647	1064.96
ITPKC	138.75	122.944	106.119	136.629	140.57	451.318	371.689	510.539	939.217	583.518	982.052	918.809	1252.53	367.939	2.45364	2.10805e-14	2.99911e-13	129.002	708.624
PANX2	74.1265	9.00692	25.2926	31.7039	54.8413	189.147	216.558	345.849	318.042	206.587	386.715	148.299	106.842	74.1892	2.44778	4.31669e-14	5.88986e-13	38.9942	221.359
ERLIN1	1400.8	695.334	1043.04	1528.58	1263.87	5979.67	4156.25	3036.63	6570.79	8354.1	8867.31	11197.6	7483.71	2501.38	2.43915	4.34375e-13	5.16276e-12	1186.33	6460.83
SLC4A9	14.5719	1.35104	3.84887	6.03884	4.41252	46.6881	10.4114	59.5418	77.0258	19.3298	57.668	19.3433	11.4474	20.0511	2.43847	3.58135e-07	1.70435e-06	6.04463	35.723
MMP8	356.061	107.633	283.167	4273.99	491.68	1602.96	12201.2	4053.91	14115.6	1687.73	4755.92	2276.07	2265.62	3077.85	2.43637	0.0026093	0.00610475	1102.51	5115.2
MIR503HG	0.63356	0.900692	3.84887	1.50971	3.78216	11.9713	5.20572	21.5364	34.7858	12.0811	10.1767	7.52241	9.53947	5.01279	2.4352	2.29734e-05	8.06086e-05	2.135	13.0924
IRAK3	8535.95	8521.45	7545.43	12252.8	9942.03	58041.7	30302.5	39784.1	68441.1	61781.7	88430.5	54378.4	53662.4	13773.1	2.43333	2.37458e-13	2.91534e-12	9359.53	52066.2
SDK1	9.50339	5.40415	15.9453	12.8325	14.4983	9.57705	18.7406	41.806	60.8752	1.20811	123.817	104.239	185.066	13.0332	2.4294	0.00544289	0.011828	11.6367	62.0402
SAMD15	33.5787	14.8614	22.5434	7.54855	8.19467	77.8135	49.9749	53.2076	90.6916	115.979	237.457	108.538	112.566	20.0511	2.42659	3.71928e-08	2.08872e-07	17.3453	96.2531
NHLH1	18.3732	10.8083	15.3955	10.568	20.1715	128.093	58.3041	163.423	120.508	74.903	84.8059	40.8359	46.7434	68.1739	2.42356	1.75392e-20	6.01303e-19	15.0633	87.3101
SLC22A14	10.7705	1.80138	6.04822	5.28398	6.3036	52.6738	26.0286	36.7386	23.6047	26.5785	54.2758	52.6569	15.2632	8.02046	2.41933	6.22095e-09	3.95827e-08	6.04154	32.8711
BUB1	56.3868	48.187	78.6269	66.4272	63.6663	293.297	219.681	212.83	203.746	1309.59	84.8059	65.5524	445.493	393.002	2.41643	8.17271e-06	3.13521e-05	62.6589	358.667
HESX1	7.60272	9.90761	13.1961	20.3811	4.41252	35.9139	19.7817	76.0108	105.6	62.8219	3.39224	8.59704	113.52	185.473	2.41432	1.1944e-05	4.43679e-05	11.1	67.9011
MROH6	36.7465	47.2863	15.9453	42.2719	25.2144	120.91	132.225	253.369	269.59	171.552	283.252	179.463	90.625	221.565	2.40915	3.82959e-18	9.49548e-17	33.4929	191.395
LOC728175	81.0956	36.0277	49.4855	74.7306	44.7555	281.326	133.266	345.849	335.435	281.49	580.072	251.463	282.368	289.739	2.40724	1.47187e-19	4.43029e-18	57.219	309.001
LOH12CR2	17.1061	5.40415	7.1479	14.3422	15.1286	49.0824	70.7978	53.2076	68.3293	48.3245	81.4137	49.433	101.118	27.069	2.39923	8.41711e-14	1.10941e-12	11.8258	60.9751
MIR4802	3.80136	0.900692	1.64952	0.754855	1.89108	13.1684	5.20572	12.6685	12.4235	7.24868	20.3534	4.29852	3.81579	13.0332	2.39696	4.65746e-06	1.8682e-05	1.7995	10.2462
LOC101927472	39.9143	13.06	29.1414	43.0267	44.1252	117.319	112.444	145.687	239.774	153.43	442.687	191.284	84.9013	192.491	2.39044	9.50469e-31	1.24498e-28	33.8535	186.669
CATIP	16.4726	15.3118	23.0932	23.4005	23.3233	114.925	69.7567	84.8788	95.661	71.2786	232.368	147.224	129.737	37.0946	2.3897	1.6885e-14	2.44434e-13	20.3203	109.214
TSPAN16	1113.8	437.736	535.543	783.539	371.912	4628.11	2518.53	5126.93	4514.7	3499.9	6921.86	2219.11	2021.41	1857.74	2.38904	1.37506e-29	1.41937e-27	648.506	3700.92
SNORD12B	157.756	41.4318	60.4822	153.236	98.9664	820.035	308.179	376.254	546.634	449.418	1127.92	566.33	249.934	409.043	2.38863	7.00872e-22	2.92564e-20	102.374	539.305
LOC101929297	0.63356	2.25173	15.3955	0.754855	13.8679	86.1934	85.3738	98.8141	9.93881	16.9136	10.1767	3.22389	8.58552	4.01023	2.3846	0.0071863	0.0151756	6.58071	35.9145
CDC45	22.8081	14.8614	25.8424	36.233	23.9537	96.9676	188.447	120.35	101.873	353.977	94.9826	39.7613	83.9473	107.274	2.38369	9.27848e-07	4.17004e-06	24.7397	131.953
DBN1	132.414	55.3925	72.5787	113.983	100.858	404.63	484.132	456.065	700.686	443.377	956.611	327.762	352.006	446.138	2.38257	4.25089e-40	2.07018e-37	95.0452	507.934
SMAP2	38062.4	16574.5	29154.1	33347.2	27806.4	190443	170556	78846	165993	163526	311114	177849	100704	38376.9	2.37769	2.22043e-15	3.68965e-14	28988.9	155268
PER1	2180.71	1934.69	3009.82	2050.94	2687.85	12678.8	13674.4	9139.03	11693	16769.8	31803.9	18539.5	3286.35	7286.59	2.37257	6.38777e-14	8.52586e-13	2372.8	13874.6
BIRC5	15.839	18.0138	29.6913	43.0267	13.8679	100.559	175.953	121.617	96.9034	337.063	76.3253	16.1194	98.2565	135.345	2.37044	5.82595e-06	2.29094e-05	24.0877	128.683
EFCAB12	57.0204	26.5704	26.3923	52.085	44.7555	286.114	138.472	277.44	329.223	188.466	351.096	194.508	115.428	131.335	2.36886	1.03264e-35	3.01737e-33	41.3647	223.565
MYO10	64.6231	62.1477	40.1382	74.7306	22.0626	172.387	104.114	552.345	537.938	109.938	362.969	270.807	206.053	381.974	2.36864	1.30513e-07	6.70316e-07	52.7405	299.836
KCND1	158.39	130.15	131.411	160.784	156.329	743.418	519.531	971.672	1383.98	785.273	873.501	600.718	336.743	953.432	2.36658	1.04247e-30	1.35614e-28	147.413	796.474
PTGER4P2-CDK2AP2P2	17.7397	17.1131	8.24758	6.79369	10.0858	70.6307	47.8926	97.5472	83.2375	78.5273	61.0603	29.015	34.3421	87.2225	2.36497	5.95228e-13	6.94847e-12	11.996	65.4973
COL17A1	15.2054	12.6097	12.6463	136.629	37.8216	39.5053	370.647	247.035	700.686	56.7813	273.075	65.5524	118.289	92.2353	2.35804	0.000672434	0.00178948	42.9823	218.201
MYLK3	16.4726	13.5104	17.045	14.3422	15.1286	143.656	40.6046	97.5472	98.1457	99.0652	125.513	40.8359	67.7302	41.1048	2.35564	4.7987e-15	7.55736e-14	15.2998	83.8003
SLC51A	151.421	48.6374	79.7266	92.8472	110.943	356.745	189.488	513.073	1333.04	360.018	644.525	369.673	286.184	539.376	2.35556	5.39167e-15	8.41446e-14	96.715	510.236
CDCA2	7.60272	13.06	21.9935	15.0971	20.1715	61.0537	95.7853	59.5418	65.8446	207.795	20.3534	35.4628	87.7631	104.266	2.35442	1.60624e-06	6.96673e-06	15.585	81.9851
MET	1.90068	0.450346	4.39871	5.28398	5.04288	20.3512	5.20572	5.06739	4.9694	85.776	1.69612	2.14926	3.81579	12.0307	2.34238	0.0132849	0.0263234	3.41532	15.6735
HIST1H1C	322.482	93.2216	254.025	216.643	426.753	2500.81	1833.46	1346.66	1743.02	964.074	1112.65	1154.15	484.605	573.463	2.34102	1.06644e-09	7.62039e-09	262.625	1301.43
ABCA1	4822.02	1818.95	4384.96	4064.14	5218.75	16234.3	7673.23	17454.6	36354.9	27706.9	22970.5	13270.6	18044.9	22660.8	2.33415	4.51821e-16	8.40714e-15	4061.76	20263.4
LOC729609	12.0376	2.25173	4.94855	9.05826	5.67324	27.534	26.0286	25.3369	45.967	25.3704	50.8835	37.612	34.3421	23.0588	2.33332	6.95866e-10	5.14064e-09	6.79388	32.9037
ASPRV1	500.512	182.39	294.164	421.209	357.414	1446.13	1819.92	2846.61	2425.07	2425.89	2912.23	1071.41	1082.73	859.192	2.33267	3.04594e-34	6.97007e-32	351.138	1876.58
LINC00862	66.5238	6.75519	23.0932	59.6335	37.8216	186.752	168.665	182.426	213.684	219.876	306.997	219.224	119.243	58.1483	2.32922	1.40082e-13	1.78084e-12	38.7655	186.113
OCLN	12.6712	5.40415	25.8424	6.79369	5.67324	31.1254	11.4526	35.4717	23.6047	32.619	452.864	257.911	19.0789	39.0997	2.32916	0.000739954	0.00195115	11.2769	100.359
AIM2	596.813	595.357	761.526	528.398	529.502	1019.96	1648.13	3259.6	5815.44	3270.36	1975.98	2497.44	4285.13	3642.29	2.32827	3.53832e-10	2.72962e-09	602.319	3046.04
LOC101927588	6.3356	4.50346	6.59806	3.77427	4.41252	34.7168	21.864	25.3369	27.3317	14.4974	42.403	21.4926	36.25	14.0358	2.32683	5.85882e-11	5.07648e-10	5.12478	26.4365
MCAM	12.0376	19.3649	29.1414	9.05826	13.8679	79.0106	66.6332	38.0054	74.5411	106.314	653.006	117.135	31.4802	42.1074	2.31527	1.41578e-08	8.52834e-08	16.694	134.248
CDC6	56.3868	33.3256	56.0835	70.9564	61.1449	260.975	248.834	220.431	272.075	685	201.838	112.836	207.96	305.78	2.31366	1.96858e-10	1.58765e-09	55.5794	279.525
BEND7	193.236	36.0277	112.167	36.233	166.415	743.418	499.749	461.132	746.653	341.896	1545.16	253.613	435.954	218.557	2.31341	2.25588e-08	1.31389e-07	108.816	582.904
CLCA3P	5.06848	3.15242	3.29903	0.754855	4.41252	33.5197	11.4526	12.6685	27.3317	10.873	25.4418	17.1941	12.4013	8.02046	2.31324	1.42913e-07	7.30449e-07	3.33746	17.6559
HMCN1	15.2054	9.90761	4.39871	6.79369	8.19467	39.5053	29.152	44.3396	26.0894	91.8166	25.4418	46.2091	29.5724	61.156	2.309	6.076e-09	3.86993e-08	8.90002	43.698
HIF1A-AS2	6.96916	4.05311	20.8939	18.8714	14.4983	28.7311	35.3989	45.6065	89.4493	71.2786	98.3749	56.9554	24.8026	141.361	2.30827	1.03173e-08	6.34573e-08	13.0572	65.7731
CFAP58	187.534	49.0877	95.1221	169.088	126.072	780.529	614.275	819.65	839.829	490.494	988.837	326.687	292.862	491.253	2.30761	4.5232e-30	5.27086e-28	125.381	627.157
RMI2	43.7156	36.478	40.1382	56.6141	47.9073	171.19	207.188	216.631	299.407	264.577	424.03	125.732	69.6381	339.867	2.30576	5.13425e-10	3.86197e-09	44.9707	235.362
LRRN1	233.15	64.8498	130.312	85.2986	185.326	416.602	381.059	516.874	1552.94	462.707	1199.16	453.494	1206.74	323.826	2.30552	1.2134e-08	7.37006e-08	139.787	723.711
AOC1	1.26712	8.55657	3.29903	7.54855	23.3233	19.1541	2.08229	64.6092	154.052	88.1922	259.506	10.7463	56.2829	1.00256	2.3053	0.00261681	0.00612081	8.79891	72.8475
GDPD3	277.499	156.72	180.347	277.787	276.097	1331.21	1236.88	1787.52	1807.62	1312.01	1326.36	690.987	688.75	691.765	2.30299	1.75759e-49	2.56784e-46	233.69	1208.12
CSF1	329.451	127.898	164.952	141.158	269.794	362.731	1223.34	1743.18	2600.24	825.141	1434.92	123.582	352.96	1610.11	2.29981	7.40151e-08	3.96438e-07	206.651	1141.8
PLK1	21.541	31.5242	22.5434	36.9879	24.584	116.122	161.377	130.485	142.87	268.201	91.5904	33.3135	178.388	145.371	2.2977	3.14467e-10	2.44581e-09	27.4361	140.858
CATIP-AS1	8.23628	2.70208	19.2443	19.6262	14.4983	52.6738	40.6046	48.1402	42.2399	43.4921	133.993	80.5972	105.888	13.0332	2.29643	1.69645e-07	8.56023e-07	12.8614	62.2958
PLIN5	530.923	115.739	152.855	532.928	272.315	1576.62	558.053	2005.42	2312.02	1257.65	3131.03	1556.06	979.704	826.107	2.29109	4.25827e-19	1.20713e-17	320.952	1578.07
APOBEC3A	970.613	312.09	859.947	1013.02	859.81	1953.72	3099.49	7968.47	6522.34	5350.73	5519.17	2507.11	883.355	4179.66	2.29066	3.96556e-16	7.4646e-15	803.095	4220.45
DDX60	1456.55	1801.38	2704.66	1833.54	1872.17	3502.81	3625.26	13764.3	23015.8	13730.2	2690.04	2178.27	8391.87	18219.5	2.28809	4.17183e-06	1.68694e-05	1933.66	9902
PAQR6	110.239	136.004	143.508	235.515	282.401	1253.4	604.905	1126.23	1857.31	699.497	1860.64	606.091	517.039	417.064	2.28615	2.06747e-21	8.09637e-20	181.534	993.575
LOC102724552	175.496	88.2678	99.5208	103.415	130.484	457.304	589.288	1486.01	887.039	711.578	527.493	276.18	443.585	421.074	2.2855	5.91273e-20	1.85928e-18	119.437	644.395
OGFR-AS1	2.53424	4.05311	1.64952	3.77427	1.89108	15.5627	10.4114	11.4016	33.5435	13.2892	18.6573	13.9702	4.76973	10.0256	2.28488	3.87712e-07	1.83728e-06	2.78044	14.6257
C7orf61	38.0136	9.90761	18.1447	24.1554	28.9965	116.122	121.814	162.156	206.23	89.4003	133.993	73.0748	41.9737	110.281	2.28396	1.1019e-19	3.3539e-18	23.8436	117.227
ACSL1	59891.7	10047.2	30020.1	58914.2	54136.5	183208	96259	193526	280996	197386	307671	211912	142707	165671	2.28366	4.15733e-18	1.02546e-16	42601.9	197704
TMEM253	6.3356	8.10623	8.24758	23.4005	19.5411	152.036	66.6332	70.9434	34.7858	48.3245	176.396	48.3583	18.125	26.0665	2.28352	2.62845e-09	1.76966e-08	13.1262	71.2965
PNPLA1	163.458	34.2263	118.765	119.267	126.702	417.799	246.751	513.073	537.938	637.883	766.645	595.345	678.256	457.166	2.27868	1.22759e-13	1.57858e-12	112.484	538.984
LGSN	35.4793	0.450346	29.1414	12.8325	40.343	50.2795	64.551	406.658	47.2093	18.1217	13.5689	101.015	4.76973	171.437	2.27721	0.0103572	0.0210525	23.6493	97.5123
NFE2	3418.05	1005.17	1082.63	3120.57	2609.69	8390.69	6500.91	17663.6	20615.6	8617.47	14230.4	5487.06	11327.2	8406.44	2.27115	1.26555e-25	8.17572e-24	2247.22	11248.8
IL1RN	3731.03	1115.96	2097.63	4176.61	2706.76	5245.83	4840.28	23254.2	22141.2	9814.71	17534.5	3195.95	5599.67	29295.7	2.27086	1.16064e-08	7.09038e-08	2765.6	13435.8
COL4A2	5.70204	2.25173	4.94855	8.3034	1.26072	10.7742	10.4114	16.469	68.3293	31.4109	28.834	11.8209	6.67763	20.0511	2.27075	7.50875e-05	0.000239365	4.49329	22.7532
MIR181A1HG	41.1814	22.9676	79.1768	87.5632	44.1252	265.763	108.279	385.122	475.82	367.266	444.383	171.941	86.8092	286.731	2.26822	1.55488e-09	1.08255e-08	55.0028	288.013
DISC2	3.80136	4.50346	2.74919	2.26456	0.63036	19.1541	2.08229	8.86793	32.3011	19.3298	25.4418	10.7463	5.72368	15.0384	2.26777	3.40245e-05	0.000115556	2.78979	15.4095
VNN1	1495.2	516.096	2312.07	2873.73	2548.54	7234.26	2389.43	8144.56	16076	8517.19	17156.2	15101.8	7576.25	2824.2	2.26698	2.66317e-07	1.29963e-06	1949.13	9446.66
SIGLEC5	2309.96	450.346	1633.02	2257.02	2464.71	6107.76	5727.34	10460.4	14273.4	9522.34	10743.2	4105.09	9310.52	9156.36	2.26623	1.23197e-17	2.83967e-16	1823.01	8822.93
RPS16P5	309.177	97.2747	126.463	157.765	151.286	533.92	491.42	941.267	841.072	840.846	1322.97	725.375	91.5789	1747.46	2.26523	1.7812e-11	1.66406e-10	168.393	837.323
MCEMP1	1184.12	453.949	822.558	1946.77	1257.57	2444.54	2199.94	6411.51	12173.8	4419.28	7155.92	2522.16	9473.65	4416.26	2.2642	2.33211e-10	1.8533e-09	1132.99	5690.78
APOBEC3B	12.6712	30.1732	22.5434	106.435	18.2804	65.8422	211.352	96.2804	325.496	526.737	42.403	25.7911	69.6381	287.734	2.26395	0.00172721	0.00420413	38.0205	183.475
CLEC4D	2391.69	1196.57	1482.36	3192.28	2781.78	6787.73	5876.22	8505.61	16272.3	11994.1	20531.5	4288.85	20154	5164.17	2.25962	2.04966e-12	2.20437e-11	2208.94	11063.8
TLR2	20278.3	6772.75	13297.8	19966.7	14352.7	67587.6	40933.6	50002.5	80201.2	75066.1	147074	68703.2	73203	41757.5	2.25911	1.39722e-20	4.86926e-19	14933.7	71614.3
CDCA5	32.9451	20.7159	44.5369	60.3884	39.7126	140.064	252.998	169.758	162.748	538.818	113.64	41.9106	103.98	215.55	2.25634	8.31653e-07	3.76085e-06	39.6598	193.274
LINC01531	41.1814	7.65588	11.5466	24.1554	15.1286	62.2508	33.3166	217.898	180.141	90.6084	118.728	36.5374	128.783	76.1944	2.25614	8.69682e-12	8.54522e-11	19.9336	104.94
TRIM22	17810.6	17725.2	22868.9	20557.7	20045.4	64664.2	56892.3	113593	169021	120415	100695	52815.9	77356.5	117974	2.25563	2.08847e-13	2.58919e-12	19801.6	97047.4
MIR6732	1.90068	3.15242	6.04822	0.754855	6.3036	10.7742	10.4114	19.0027	23.6047	13.2892	49.1874	8.59704	5.72368	41.1048	2.25474	0.000270928	0.000775076	3.63195	20.1884
ORM1	671.573	59.896	78.6269	613.697	366.869	2493.62	1156.71	2222.05	1787.74	581.102	7546.03	778.032	470.296	115.294	2.25458	1.58891e-05	5.75149e-05	358.132	1905.65
CDC20	19.6403	9.90761	29.1414	43.0267	16.3893	81.4049	113.485	116.55	100.63	338.272	83.1098	24.7165	100.164	96.2455	2.25426	5.82378e-06	2.29056e-05	23.6211	117.175
S100A9	211761	42844.1	103696	230073	176936	559622	490629	869485	1.01241e+06	650907	1.29104e+06	389597	631900	564684	2.25335	3.32909e-22	1.44031e-20	153062	717808
CAHM	7.60272	9.90761	13.1961	9.81311	7.56431	62.2508	28.1109	45.6065	68.3293	48.3245	71.237	41.9106	23.8487	51.1304	2.25098	2.91506e-17	6.46041e-16	9.61678	48.9721
HIST1H1T	11.4041	3.60277	5.49839	5.28398	5.67324	11.9713	15.6172	36.7386	23.6047	51.9488	39.0107	18.2687	26.7105	37.0946	2.2499	1.44244e-06	6.31251e-06	6.29249	28.9961
VPS9D1	186.267	194.549	221.035	207.585	269.164	590.186	827.71	1762.18	2269.78	1017.23	1920.01	711.405	452.171	1037.65	2.24933	1.21551e-27	1.02426e-25	215.72	1176.48
LRWD1	157.756	66.6512	124.264	127.57	179.652	416.602	926.619	658.76	867.161	321.358	1160.14	525.494	309.079	559.427	2.24915	9.20406e-14	1.20477e-12	131.179	638.294
MIR6883	27.2431	22.5173	30.791	17.3617	27.1055	126.896	115.567	79.8114	118.023	118.395	189.965	212.777	69.6381	78.1995	2.24901	1.67956e-10	1.36441e-09	25.0037	123.252
PLK2	86.7977	42.7829	147.357	66.4272	64.927	292.1	322.755	334.448	359.039	513.448	1336.54	294.449	179.342	411.048	2.24562	1.4352e-15	2.436e-14	81.6583	449.241
IFITM2	41355	8624.57	18079.2	32409.7	28810.6	118488	127777	157593	191409	104986	181081	95342.2	34577.7	94632.4	2.24544	1.93775e-14	2.77136e-13	25855.8	122876
IFIT2	6867.15	2773.68	11551.6	7982.59	7332.97	13579.1	15291.3	45098.5	96714.5	46317.8	13053.3	8790.47	30302.1	67404.9	2.24413	1.52807e-06	6.65658e-06	7301.59	37394.7
C2-AS1	0.63356	5.8545	2.19935	2.26456	0.63036	4.78852	7.28801	8.86793	12.4235	15.7055	6.78447	4.29852	29.5724	10.0256	2.24202	0.000681716	0.00181215	2.31647	11.0838
MIR3909	17.1061	5.8545	12.0964	15.852	20.8019	68.2365	26.0286	65.876	96.9034	101.481	171.308	65.5524	8.58552	80.2046	2.23938	2.07631e-09	1.41396e-08	14.3422	76.0196
WFDC5	1.90068	1.80138	0.549839	1.50971	1.26072	8.37992	9.3703	11.4016	4.9694	8.45679	20.3534	6.44778	0.953947	2.00511	2.23736	0.000156258	0.000470184	1.40447	8.03759
LINC00908	5.70204	1.35104	4.94855	3.77427	1.89108	17.957	11.4526	29.1375	21.12	8.45679	3.39224	20.418	23.8487	10.0256	2.23689	0.000164924	0.000493914	3.53339	16.2009
HIST1H3A	2.53424	4.05311	2.74919	3.01942	3.78216	28.7311	20.8229	20.2696	17.3929	9.6649	20.3534	18.2687	3.81579	10.0256	2.23604	7.86449e-07	3.57003e-06	3.22762	16.5939
ACOXL	32.9451	4.50346	5.49839	14.3422	12.6072	106.545	37.4812	69.6766	57.1481	148.598	42.403	19.3433	26.7105	63.1611	2.23501	4.93877e-06	1.97063e-05	13.9793	63.4518
COL7A1	29.1437	13.06	32.9903	14.3422	40.9734	125.699	145.76	153.288	182.626	82.1517	252.722	126.806	40.0658	89.2276	2.23493	1.36685e-16	2.75298e-15	26.1019	133.15
RAI2	15.839	6.30484	9.34726	8.3034	3.78216	44.2938	41.6458	111.483	31.0588	41.0758	196.75	23.6419	10.4934	23.0588	2.23415	9.23371e-08	4.85537e-07	8.71533	58.1667
GADD45A	209.075	209.411	239.18	292.129	283.662	1227.06	744.418	1057.82	1412.55	1138.04	1590.96	1401.32	1396.58	513.309	2.23277	1.35518e-16	2.73237e-15	246.691	1164.67
[truncated: 3,739 more rows]

## Sheet: RNA and >padj0.01 excluded
Gene	Healthy_1	Healthy_2	Healthy_3	Healthy_4	Healthy_5	ID1_1st	ID2_1st	ID3_1st	ID4_1st	ID5_1st	ID6_1st	ID7_1st	ID14_1st	ID24_1st	log2FoldChange	pvalue	padj	meanHealthy	mean1st
[truncated: 3,409 more rows]

[truncated: 6 more sheets: GSEA-H, GSEA-C2, GSEA-C5, GSEA-C7, gene famlies, ranked gene list]
