# Supplementary material for: Impact of BNT162b First Vaccination on the Immune Transcriptome of Elderly Patients Infected with the B.1.351 SARS-CoV-2 Variant
Source: Res Sq. 2021 Jun 1:rs.3.rs-509143. Preprint. [Version 1] doi: 10.21203/rs.3.rs-509143/v1 (PMC8183022; doi:10.21203/rs.3.rs-509143/v1)
Supplement: Supplement 5 [file e550ab400bce969ebd9db1c3.xlsx]

## Sheet: B1351_Non_vaccine vs Vaccine_1s
	Non-vaccinated		Vaccinated
Gene	ID1_1st	ID6_1st	ID2_1st	ID3_1st	ID4_1st	ID5_1st	log2FoldChange	pvalue	padj	meanNon_vaccine	meanVaccine
A1BG	3.59139	3.39224	2.08229	7.60108	1.24235	6.04056	0.232293	0.860799	NA	3.49181	4.24157
A1BG-AS1	26.3369	6.78447	17.6995	21.5364	14.9082	8.45679	0.00467008	0.993676	0.998363	16.5607	15.6502
A1CF	3.59139	3.39224	2.08229	1.26685	1.24235	4.83245	-0.563644	0.591925	NA	3.49181	2.35598
A2M	52.6738	84.8059	162.419	32.938	98.1457	57.9894	0.255495	0.566926	0.82406	68.7398	87.8729
A2M-AS1	21.5484	35.6185	59.3452	6.33424	11.1812	21.746	-0.625547	0.272929	0.615099	28.5834	24.6517
A2ML1	4.78852	5.08835	1.04114	1.26685	0	6.04056	-1.25249	0.268929	NA	4.93844	2.08714
A2MP1	83.7992	69.5408	102.032	6.33424	6.21175	32.619	-1.636	0.0037911	0.0829164	76.67	36.7993
A3GALT2	489.627	754.773	351.907	273.639	639.811	437.337	-0.553436	0.124161	0.441983	622.2	425.673
A4GNT	5.98565	1.69612	7.28801	16.469	8.69646	8.45679	1.36681	0.184892	NA	3.84089	10.2276
AAAS	803.275	613.995	721.513	689.165	740.441	752.654	0.0415726	0.757209	0.9147	708.635	725.943
AACS	155.627	150.955	163.46	116.55	224.866	175.176	0.156191	0.593961	0.839955	153.291	170.013
AAED1	173.584	218.799	249.875	271.105	323.011	256.12	0.486715	0.0450267	0.281435	196.192	275.028
AAGAB	1786.12	1497.67	1910.5	2223.32	2025.03	2097.28	0.319651	0.0619444	0.330091	1641.9	2064.03
AAK1	5045.91	4842.42	5851.23	4393.43	4594.21	4354.04	-0.0454287	0.769918	0.919006	4944.16	4798.23
AAMDC	114.925	152.651	197.817	207.763	248.47	184.841	0.650335	0.0161487	0.169594	133.788	209.723
AAMP	1277.34	912.512	1085.91	1691.24	1259.74	1215.36	0.262511	0.163598	0.497965	1094.93	1313.06
AANAT	126.896	145.866	135.349	182.426	537.938	240.414	0.855532	0.0673266	0.340899	136.381	274.032
AAR2	286.114	432.51	582	603.019	500.667	589.559	0.661606	0.00206048	0.0599975	359.312	568.811
AARD	0	3.39224	1.04114	2.53369	0	4.83245	0.106186	0.950148	NA	1.69612	2.10182
AARS	791.304	346.008	672.579	686.631	550.361	1258.85	0.5613	0.0759854	0.359409	568.656	792.106
AARS2	180.767	176.396	215.517	195.094	200.018	240.414	0.261318	0.142898	0.466299	178.582	212.761
AASDH	487.232	322.262	497.667	315.445	407.491	443.377	0.0680853	0.721913	0.901085	404.747	415.995
AASDHPPT	763.77	444.383	740.254	591.618	588.874	734.532	0.175866	0.368421	0.694785	604.076	663.82
AASS	228.652	162.827	236.34	91.213	131.689	142.557	-0.408364	0.215271	0.560185	195.74	150.45
AATBC	123.304	55.9719	97.8676	209.03	93.1763	146.182	0.611998	0.139415	0.462051	89.6382	136.564
AATF	2591.79	3638.17	2582.04	3488.9	2975.43	2713.42	-0.0797757	0.490474	0.777008	3114.98	2939.95
AATK	226.258	803.96	336.29	309.111	493.213	251.287	-0.458513	0.475183	0.768168	515.109	347.475
ABALON	3.59139	33.9224	11.4526	29.1375	9.93881	4.83245	-0.141577	0.840862	NA	18.7569	13.8403
ABAT	2536.72	3326.09	1768.9	4171.73	2784.11	3545.81	0.00340998	0.99068	0.99722	2931.4	3067.64
ABCA1	16234.3	22970.5	7673.23	17454.6	36354.9	27706.9	0.0331257	0.932823	0.980807	19602.4	22297.4
ABCA10	198.724	232.368	149.925	114.016	140.386	164.303	-0.595226	0.0350292	0.251608	215.546	142.157
ABCA11P	87.3906	39.0107	78.0858	30.4043	60.8752	26.5785	-0.300184	0.444614	0.74906	63.2006	48.986
ABCA12	5.98565	1.69612	6.24687	0	0	0	-1.68135	0.214746	NA	3.84089	1.56172
ABCA13	457.304	1334.85	2674.7	1156.63	3001.52	368.474	1.49505	0.214534	0.559262	896.075	1800.33
ABCA17P	4.78852	6.78447	6.24687	1.26685	1.24235	2.41623	-1.26483	0.2158	NA	5.7865	2.79307
ABCA2	2110.54	3449.9	1702.27	2182.78	3397.83	2656.64	-0.155366	0.706738	0.894235	2780.22	2484.88
ABCA3	47.8852	54.2758	102.032	49.407	55.9058	55.5732	0.293187	0.499117	0.783854	51.0805	65.7295
ABCA4	0	6.78447	0	0	2.4847	2.41623	-1.34411	0.453921	NA	3.39224	1.22523
ABCA5	3225.07	4148.71	2506.03	1736.85	2400.22	3092.77	-0.599963	0.0370496	0.260148	3686.89	2433.97
ABCA6	53.8709	32.2262	22.9052	15.2022	29.8164	33.8272	-0.797002	0.372387	0.696745	43.0486	25.4377
ABCA7	5423	6998.18	5911.62	6364.64	5180.6	6107.01	-0.0636795	0.871519	0.960263	6210.59	5890.97
ABCA9	58.6594	57.668	39.5635	31.6712	26.0894	45.9083	-0.725161	0.3447	0.676685	58.1637	35.8081
ABCB1	181.964	184.877	507.037	73.4771	69.5717	200.547	-0.270484	0.526637	0.799096	183.42	212.658
ABCB10	1219.88	924.384	1573.17	1136.36	1188.93	1090.93	0.226259	0.140122	0.462288	1072.13	1247.35
ABCB11	77.8135	44.0991	26.0286	8.86793	73.2987	18.1217	-1.07427	0.221407	0.567178	60.9563	31.5792
ABCB4	79.0106	11.8728	52.0572	3.80054	177.656	21.746	0.817576	0.369265	0.694794	45.4417	63.815
ABCB6	446.53	395.196	271.739	410.458	386.371	369.682	-0.254787	0.346388	0.677874	420.863	359.563
ABCB7	700.322	424.03	720.472	737.305	561.543	578.686	0.223638	0.194525	0.536507	562.176	649.501
ABCB8	184.358	181.485	216.558	210.297	229.835	188.466	0.220343	0.405424	0.721888	182.921	211.289
ABCB9	44.2938	5.08835	13.5349	12.6685	21.12	50.7407	0.257013	0.719349	0.900139	24.6911	24.516
ABCC1	1980.05	1942.06	2003.16	1942.08	2143.06	2047.75	0.0518251	0.778506	0.922572	1961.05	2034.01
ABCC10	629.691	574.984	673.62	689.165	616.206	633.051	0.119758	0.518351	0.794951	602.337	653.011
ABCC11	156.824	308.694	178.036	10.1348	50.9364	107.522	-1.70774	0.0672764	0.340876	232.759	86.6572
ABCC13	2.39426	3.39224	1.04114	10.1348	1.24235	0	0.0948521	0.952975	NA	2.89325	3.10457
ABCC2	997.21	1036.33	522.654	983.073	1108.18	984.612	-0.25213	0.310462	0.650346	1016.77	899.629
ABCC3	763.77	1282.27	1487.8	1023.61	300.649	1180.33	-0.0817935	0.876149	0.961726	1023.02	998.096
ABCC4	957.705	478.305	1795.97	829.785	286.983	541.234	0.215821	0.706662	0.894235	718.005	863.494
ABCC5	5208.72	10870.4	3293.14	4370.62	2695.9	4531.63	-1.06807	0.00972648	0.133456	8039.57	3722.82
ABCC5-AS1	2.39426	8.48059	3.12343	0	3.72705	1.20811	-1.38928	0.427652	NA	5.43743	2.01465
ABCC6	985.239	1731.74	819.381	943.801	606.267	774.4	-0.733804	0.154187	0.484209	1358.49	785.962
ABCC6P1	14.3656	5.08835	9.3703	5.06739	22.3623	3.62434	0.0481937	0.963861	NA	9.72696	10.1061
ABCC8	0	5.08835	0	0	8.69646	0	-0.114064	0.979659	NA	2.54418	2.17411
ABCD1	158.021	212.015	200.941	297.709	371.463	306.861	0.645294	0.107211	0.415791	185.018	294.243
ABCD2	172.387	72.9331	297.767	93.7467	69.5717	147.39	0.252979	0.418682	0.730067	122.66	152.119
ABCD3	735.038	639.437	831.874	599.219	575.208	718.827	-0.012199	0.939453	0.983441	687.237	681.282
ABCD4	979.253	915.904	1174.41	1035.01	1001.33	941.12	0.134003	0.476425	0.769223	947.578	1037.97
ABCE1	1055.87	612.299	1093.2	880.459	713.109	1287.85	0.288934	0.178073	0.518157	834.084	993.654
ABCF1	1023.55	1399.3	1453.44	2178.98	1318.13	1617.66	0.442722	0.158866	0.491376	1211.42	1642.05
ABCF2	1031.93	561.415	851.656	901.995	781.439	920.582	0.160572	0.236872	0.581497	796.671	863.918
ABCF3	2120.12	4606.66	2425.87	2683.18	2156.72	2876.52	-0.328553	0.107549	0.415999	3363.39	2535.57
ABCG1	3317.25	6738.68	2117.69	3691.59	6345.93	5661.22	-0.174054	0.594137	0.840124	5027.96	4454.11
ABCG2	22.7455	3.39224	19.7817	7.60108	1.24235	2.41623	-0.649257	0.494627	0.780434	13.0689	7.76035
ABCG4	2.39426	0	1.04114	2.53369	1.24235	0	-0.205758	0.935154	NA	1.19713	1.2043
ABHD1	32.3225	15.2651	34.3578	13.9353	16.1506	21.746	-0.157715	0.780334	0.923816	23.7938	21.5474
ABHD10	677.576	273.075	497.667	309.111	406.249	588.351	0.00162889	0.994885	0.998507	475.326	450.344
ABHD11	343.577	262.898	157.213	222.965	206.23	244.039	-0.543594	0.0328713	0.243633	303.237	207.612
ABHD11-AS1	15.5627	6.78447	4.16458	1.26685	14.9082	2.41623	-0.904193	0.409224	NA	11.1736	5.68897
ABHD12	259.777	171.308	310.261	329.38	273.317	347.936	0.561083	0.00227861	0.0630501	215.543	315.224
ABHD12B	906.228	1148.27	644.468	770.243	1098.24	922.998	-0.287153	0.483047	0.772595	1027.25	858.987
ABHD13	4710.71	6056.84	4114.6	4279.41	4631.48	4395.11	-0.299512	0.00796025	0.122133	5383.77	4355.15
ABHD14A	20.3512	40.7068	34.3578	11.4016	16.1506	25.3704	-0.488814	0.270366	0.612873	30.529	21.8201
ABHD14B	492.021	254.418	635.098	283.774	354.07	373.307	0.161113	0.315381	0.654504	373.219	411.562
ABHD15	220.272	162.827	349.825	129.218	198.776	171.552	0.119689	0.662594	0.872064	191.55	212.343
ABHD16A	4193.55	7905.61	3905.33	5773.02	6519.86	4927.89	-0.16737	0.392486	0.711714	6049.58	5281.53
ABHD16B	15.5627	11.8728	5.20572	10.1348	9.93881	10.873	-0.657082	0.346	NA	13.7178	9.03808
ABHD17A	67.0393	196.75	137.431	77.2777	84.4799	65.2381	-0.570602	0.243539	0.588999	131.895	91.1067
ABHD17B	906.228	761.557	807.928	591.618	883.312	793.73	-0.11663	0.609217	0.847264	833.893	769.147
ABHD17C	229.849	167.916	167.624	181.159	263.378	149.806	-0.105053	0.859842	0.956476	198.882	190.492
ABHD2	10508.4	16862.8	11352.6	14343.2	20508.7	14185.7	0.140024	0.644187	0.861552	13685.6	15097.6
ABHD3	11302.1	14084.6	10181.4	10131	12526.6	7309.08	-0.341862	0.0991251	0.401825	12693.3	10037
ABHD4	2232.65	4082.56	2475.84	2357.6	2554.27	2549.12	-0.295234	0.244185	0.589769	3157.6	2484.21
ABHD5	11828.9	24907.5	10670.7	12093.3	13873.3	12563.2	-0.501038	0.166967	0.503626	18368.2	12300.1
ABHD6	120.91	135.689	82.2504	81.0782	118.023	190.882	-0.128895	0.757821	0.914772	128.3	118.058
ABHD8	23.9426	11.8728	21.864	17.7359	24.847	15.7055	0.158733	0.800446	0.93321	17.9077	20.0381
ABI1	10035.5	15263.4	9748.24	11271.1	13028.5	10636.2	-0.166396	0.230969	0.575286	12649.5	11171
ABI2	873.906	590.249	1030.73	571.348	444.762	681.376	-0.114033	0.506953	0.787872	732.077	682.055
ABI3	822.429	1034.63	980.758	492.804	356.555	473.58	-0.819048	0.0420738	0.27369	928.531	575.924
ABI3BP	27.534	28.834	28.1109	10.1348	11.1812	14.4974	-0.87787	0.153333	0.482542	28.184	15.981
ABL1	560.257	586.857	735.048	796.847	764.046	712.786	0.390234	0.005231	0.0974584	573.557	752.182
ABL2	1381.49	2050.61	1192.11	1214.91	1948.01	1313.22	-0.269696	0.146889	0.472512	1716.05	1417.06
ABLIM1	2650.45	2191.38	5294.22	1978.82	1622.51	1360.33	-0.0438841	0.900178	0.970936	2420.92	2563.97
ABLIM2	9.57705	5.08835	6.24687	7.60108	11.1812	1.20811	-0.123252	0.875397	NA	7.3327	6.5593
ABLIM3	2121.32	2550.96	1877.18	1996.55	592.601	2132.32	-0.484359	0.393657	0.713118	2336.14	1649.66
ABO	59.8565	39.0107	35.3989	69.6766	33.5435	33.8272	-0.244889	0.701657	0.891717	49.4336	43.1115
ABR	4110.95	7829.28	5105.77	6123.94	7639.22	5309.65	0.0493748	0.826123	0.944112	5970.11	6044.65
ABRA	15.5627	15.2651	13.5349	3.80054	11.1812	6.04056	-0.83369	0.265071	NA	15.4139	8.63928
ABRACL	1725.07	1261.91	1699.15	2258.79	1344.22	1640.62	0.202123	0.466295	0.761758	1493.49	1735.69
ABT1	307.663	415.549	543.477	506.739	407.491	425.256	0.380565	0.0546931	0.30827	361.606	470.741
ABTB1	10002	21550.9	11495.3	10747.9	13987.6	8688.75	-0.417272	0.342737	0.675874	15776.5	11229.9
ABTB2	142.459	259.506	120.773	321.779	211.2	165.511	-0.0162262	0.964914	0.990706	200.982	204.816
ACAA1	5718.69	6599.6	4323.87	5781.89	5552.07	3857.5	-0.358737	0.0746686	0.35627	6159.15	4878.83
ACAA2	651.239	732.723	1464.89	1121.16	951.641	1192.41	0.755152	0.000125713	0.0140179	691.981	1182.52
ACACA	411.813	234.064	533.066	364.852	465.882	431.296	0.502828	0.0308409	0.236442	322.939	448.774
ACACB	363.928	739.508	564.3	377.52	525.514	442.169	-0.20227	0.471171	0.765611	551.718	477.376
ACAD10	1302.48	1112.65	1048.43	1247.84	1538.03	1227.44	0.0539817	0.714644	0.897705	1207.57	1265.44
ACAD11	22.7455	18.6573	39.5635	24.0701	17.3929	16.9136	0.242182	0.596237	0.841979	20.7014	24.485
ACAD8	1443.74	1853.86	1636.68	1809.06	1826.26	1330.13	0.00545451	0.977789	0.994022	1648.8	1650.53
ACAD9	399.842	396.892	465.392	475.068	416.188	445.794	0.182687	0.191666	0.535282	398.367	450.61
ACADM	790.106	530.885	811.051	786.712	1018.73	977.363	0.461524	0.0305276	0.234883	660.496	898.464
ACADS	29.9283	28.834	63.5098	46.8733	43.4823	51.9488	0.817459	0.0396763	0.266719	29.3811	51.4536
ACADSB	804.472	798.872	829.792	700.566	711.867	601.64	-0.171144	0.388116	0.708952	801.672	710.966
ACADVL	8839.61	8307.59	10919.5	10343.8	9382.23	9957.26	0.243564	0.195243	0.537556	8573.6	10150.7
ACAN	0	0	5.20572	3.80054	2.4847	4.83245	3.96342	0.0186109	NA	0	4.08085
ACAP1	4613.74	10926.4	4252.03	6487.52	10558.7	5472.75	-0.189097	0.461905	0.759693	7770.07	6692.76
ACAP2	25035.6	26759.7	18247.1	25596.6	29381.6	24159.8	-0.128863	0.417486	0.729258	25897.6	24346.3
ACAP3	469.275	464.736	385.223	450.998	453.458	368.474	-0.175055	0.501665	0.785239	467.006	414.538
ACAT1	542.3	398.588	652.798	486.469	525.514	618.554	0.282028	0.123995	0.441912	470.444	570.834
ACAT2	227.455	230.672	242.587	288.841	259.651	324.982	0.276155	0.339193	0.674055	229.063	279.015
ACBD3	1879.5	1723.26	1584.62	1748.25	1805.14	1989.76	-0.0242831	0.856214	0.955692	1801.38	1781.94
ACBD4	198.724	139.082	251.957	174.825	156.536	113.563	0.0590934	0.828497	0.945338	168.903	174.22
ACBD5	1885.48	1762.27	1728.3	2087.76	1800.17	1797.67	0.0171132	0.874886	0.961711	1823.87	1853.48
ACBD6	471.67	980.356	316.508	530.809	673.354	489.286	-0.516201	0.0524114	0.302835	726.013	502.489
ACBD7	499.204	456.256	58.3041	64.6092	310.588	147.39	-1.80828	0.0186803	0.182551	477.73	145.223
ACCS	610.537	276.467	492.461	388.922	472.093	366.058	-0.0144509	0.973327	0.992427	443.502	429.884
ACCSL	25.1397	37.3146	12.4937	36.7386	8.69646	4.83245	-1.08344	0.192469	NA	31.2272	15.6903
ACD	247.806	217.103	200.941	168.491	155.294	182.425	-0.386275	0.0584345	0.319476	232.455	176.788
ACE	10.7742	8.48059	20.8229	13.9353	63.3599	19.3298	1.66165	0.0384204	0.263339	9.62738	29.362
ACE2	50.2795	113.64	20.8229	29.1375	58.3905	44.7002	-1.07391	0.00945788	0.130952	81.9597	38.2628
ACER1	8.37992	13.5689	27.0698	7.60108	6.21175	7.24868	-0.076551	0.912381	0.97391	10.9744	12.0328
ACER2	53.8709	32.2262	51.0161	25.3369	26.0894	18.1217	-0.509647	0.234391	0.579751	43.0486	30.141
ACER3	2141.67	2167.64	1737.67	3250.73	2967.98	2644.56	0.236391	0.261397	0.60578	2154.65	2650.23
ACIN1	13366	15731.5	11919	15292.1	16746.9	14104.7	-0.0172176	0.834089	0.947538	14548.7	14515.7
ACKR1	2.39426	1.69612	0	5.06739	1.24235	1.20811	0.0412793	0.982514	NA	2.04519	1.87946
ACKR2	8.37992	3.39224	4.16458	7.60108	1.24235	1.20811	-0.695899	0.438892	NA	5.88608	3.55403
ACKR3	17.957	42.403	60.3864	13.9353	9.93881	66.4462	0.00333209	0.996168	0.998909	30.18	37.6767
ACKR4	113.727	62.7564	73.9213	48.1402	57.1481	80.9435	-0.459868	0.13552	0.456892	88.2419	65.0383
ACLY	2888.68	3039.44	3253.58	4085.58	4082.37	3518.02	0.319685	0.00443492	0.0896706	2964.06	3734.89
ACMSD	28.7311	23.7457	14.576	11.4016	9.93881	15.7055	-1.01896	0.0457275	0.283982	26.2384	12.9055
ACO1	702.716	778.518	670.497	1337.79	1641.15	1472.69	0.745021	0.0951922	0.393957	740.617	1280.53
ACO2	679.97	637.74	748.583	970.405	950.398	1035.35	0.48461	0.00870701	0.12668	658.855	926.185
ACOT1	15.5627	16.9612	47.8926	26.6038	23.6047	7.24868	0.6768	0.388848	0.709682	16.2619	26.3374
ACOT11	3.59139	8.48059	14.576	2.53369	6.21175	1.20811	-0.18449	0.856455	NA	6.03599	6.1324
ACOT12	4.78852	3.39224	1.04114	11.4016	0	6.04056	0.0618991	0.967092	NA	4.09038	4.62083
ACOT13	1273.75	1495.98	963.059	1292.18	1229.93	1060.72	-0.302389	0.0150476	0.165464	1384.86	1136.47
ACOT2	96.9676	78.0214	156.172	70.9434	79.5105	113.563	0.251056	0.295971	0.635605	87.4945	105.047
ACOT4	4.78852	16.9612	31.2343	2.53369	2.4847	15.7055	-0.0730789	0.919716	0.975902	10.8749	12.9895
ACOT7	27.534	57.668	92.6619	44.3396	24.847	39.8677	0.0634685	0.905228	0.97229	42.601	50.4291
ACOT8	232.243	361.273	284.232	348.383	366.494	332.231	0.168039	0.489558	0.776841	296.758	332.835
ACOT9	2357.15	2946.16	2224.93	3768.87	3293.47	3333.18	0.227906	0.384132	0.705877	2651.65	3155.11
ACOX1	10847.2	23352.2	13672.3	13975.9	14480.8	15245.2	-0.168017	0.617268	0.850719	17099.7	14343.5
ACOX2	7.18279	15.2651	10.4114	25.3369	22.3623	21.746	0.786288	0.228136	NA	11.2239	19.9642
ACOX3	167.598	191.661	171.789	178.625	206.23	205.379	0.084751	0.667706	0.87416	179.63	190.506
ACOXL	106.545	42.403	37.4812	69.6766	57.1481	148.598	-0.086059	0.902115	0.971489	74.4738	78.2259
ACP1	1243.82	797.176	1592.95	1169.3	858.464	1342.21	0.296172	0.0650022	0.336431	1020.5	1240.73
ACP2	225.061	200.142	307.138	415.526	327.981	442.169	0.800943	0.000253091	0.0195619	212.601	373.203
ACP5	298.086	173.004	204.064	190.027	291.952	233.166	-0.00393068	0.991544	0.997553	235.545	229.802
ACP6	275.34	471.521	382.1	305.31	345.374	300.82	-0.145376	0.661929	0.871874	373.43	333.401
ACPP	2185.96	2540.79	2625.77	2099.17	1541.76	2102.12	-0.215473	0.508454	0.788889	2363.37	2092.2
ACPT	4.78852	5.08835	6.24687	1.26685	3.72705	7.24868	-0.0672018	0.950718	NA	4.93844	4.62236
ACRBP	2213.5	3678.88	3382.68	2911.21	1308.2	3216	-0.142976	0.764895	0.916819	2946.19	2704.52
ACRC	488.429	798.872	575.753	508.006	515.576	448.21	-0.299606	0.137873	0.459845	643.651	511.886
ACRV1	1.19713	0	5.20572	8.86793	2.4847	2.41623	2.74222	0.131841	NA	0.598565	4.74364
ACSBG1	93.3762	130.601	85.3738	39.2723	18.6353	61.6137	-1.16426	0.0439552	0.278361	111.989	51.2238
ACSBG2	14.3656	25.4418	16.6583	8.86793	13.6659	19.3298	-0.465059	0.418347	0.729958	19.9037	14.6305
ACSF2	345.971	125.513	212.393	254.636	291.952	351.561	0.354644	0.335447	0.670983	235.742	277.636
ACSF3	237.032	215.407	270.698	267.305	245.985	302.028	0.270455	0.22639	0.571115	226.219	271.504
ACSL1	183208	307671	96259	193526	280996	197386	-0.454861	0.179483	0.518938	245439	192042
ACSL3	3160.43	4001.14	1824.08	3713.13	4560.67	3940.86	-0.110216	0.518943	0.795286	3580.78	3509.69
ACSL4	8174.01	16857.7	7712.8	13570.5	19589.4	12992	0.104585	0.677112	0.87831	12515.9	13466.2
ACSL5	1899.85	2303.33	3053.68	3908.22	3031.34	2962.29	0.618506	0.000276013	0.0204168	2101.59	3238.88
ACSL6	154.43	303.605	331.084	111.483	54.6634	80.9435	-1.00438	0.0736452	0.354253	229.018	144.543
ACSM1	9.57705	8.48059	20.8229	12.6685	28.5741	4.83245	0.866068	0.146432	0.471591	9.02882	16.7245
ACSM3	35.9139	30.5301	56.2218	34.2049	21.12	41.0758	0.211691	0.519304	0.795467	33.222	38.1556
ACSM4	17.957	0	18.7406	6.33424	48.4517	14.4974	1.52962	0.177035	0.516863	8.97848	22.006
ACSM6	0	0	0	0	2.4847	0	1.32786	0.567544	NA	0	0.621175
ACSS1	1884.28	1002.41	2106.24	1360.59	1150.42	1646.66	0.155408	0.279319	0.62311	1443.34	1565.98
ACSS2	2662.42	2991.95	2399.84	3813.21	4088.58	2412.6	0.115551	0.466052	0.761648	2827.19	3178.56
ACSS3	41.8996	98.3749	20.8229	65.876	21.12	66.4462	-0.595733	0.339125	0.674011	70.1372	43.5663
ACTA2	98.1647	156.043	204.064	315.445	387.613	141.349	1.03098	0.00098334	0.0406909	127.104	262.118
ACTA2-AS1	31.1254	8.48059	18.7406	20.2696	34.7858	32.619	0.388933	0.454339	0.755672	19.803	26.6038
ACTB	170592	284787	186490	242388	212717	159843	-0.159103	0.423298	0.733909	227690	200359
ACTG1	30982.9	37837	31622.7	30990.9	31004.1	26063.8	-0.197349	0.300671	0.639793	34410	29920.4
ACTG1P17	81.4049	39.0107	84.3327	20.2696	26.0894	47.1164	-0.528908	0.175617	0.514726	60.2078	44.452
ACTG1P20	292.1	641.133	450.816	456.065	525.514	607.681	0.191441	0.377336	0.701034	466.616	510.019
ACTG1P4	55.068	25.4418	44.7692	40.5391	59.6328	44.7002	0.207483	0.587075	0.836066	40.2549	47.4103
ACTG2	2.39426	0	0	0	0	1.20811	-1.20632	0.629843	NA	1.19713	0.302028
ACTL10	4.78852	0	1.04114	0	3.72705	4.83245	0.243385	0.86897	NA	2.39426	2.40016
ACTL6A	572.229	424.03	666.332	504.205	432.338	589.559	0.147216	0.43702	0.743081	498.129	548.109
ACTN1	12714.7	24013.6	14654.1	21146.2	27037.3	15146.1	0.107313	0.701183	0.89124	18364.2	19495.9
ACTN1-AS1	4.78852	3.39224	7.28801	3.80054	0	2.41623	-0.320798	0.806377	NA	4.09038	3.37619
ACTN2	1.19713	0	1.04114	1.26685	0	6.04056	1.67734	0.500838	NA	0.598565	2.08714
ACTN3	2.39426	0	5.20572	0	1.24235	3.62434	0.912886	0.593498	NA	1.19713	2.5181
ACTN4	4223.48	6341.79	4564.38	5735.02	6304.93	5092.19	0.0415147	0.821425	0.94282	5282.63	5424.13
ACTR10	2559.47	3142.91	2582.04	3004.96	2461.1	2452.47	-0.117308	0.376226	0.70042	2851.19	2625.14
ACTR1A	3439.36	5212.17	3609.65	4322.48	4428.98	3601.38	-0.107685	0.452306	0.754281	4325.76	3990.62
ACTR1B	654.831	727.635	950.565	711.968	750.38	518.28	0.0751826	0.763707	0.916203	691.233	732.798
ACTR2	52655.8	84061.3	47054.5	60698.4	64863.1	51971.8	-0.27532	0.143514	0.467259	68358.6	56147
ACTR3	30196.4	50664.7	28932.4	34915.6	36651.8	31966.7	-0.258879	0.0757156	0.35886	40430.6	33116.6
ACTR3B	166.401	195.054	203.023	207.763	80.7528	167.928	-0.152724	0.677824	0.878568	180.727	164.867
ACTR3C	38.3082	35.6185	41.6458	51.9407	44.7246	47.1164	0.293713	0.357053	0.685987	36.9633	46.3569
ACTR5	380.688	254.418	323.796	259.704	224.866	303.236	-0.184006	0.336932	0.672604	317.553	277.9
ACTR6	456.107	395.196	588.247	416.793	534.211	451.834	0.23249	0.179603	0.518938	425.651	497.771
ACTR8	605.748	620.779	566.383	641.025	677.081	784.065	0.113785	0.615342	0.849756	613.264	667.138
ACTRT3	4.78852	1.69612	2.08229	1.26685	7.45411	8.45679	0.454911	0.733145	NA	3.24232	4.81501
ACVR1	665.605	615.691	739.213	710.701	463.397	645.132	-0.0073689	0.97669	0.993458	640.648	639.611
ACVR1B	2881.49	4191.11	1630.43	2009.22	3102.15	2486.3	-0.625009	0.0324161	0.241697	3536.3	2307.02
ACVR1C	149.641	45.7952	191.571	65.876	40.9976	71.2786	-0.0662609	0.90503	0.97229	97.7183	92.4307
ACVR2A	521.949	332.439	527.86	495.337	221.138	223.501	-0.197617	0.567218	0.82406	427.194	366.959
ACVR2B	179.57	235.76	336.29	155.822	144.113	164.303	-0.145298	0.753284	0.91338	207.665	200.132
ACVR2B-AS1	4.78852	3.39224	8.32916	3.80054	1.24235	3.62434	-0.0139956	0.989342	NA	4.09038	4.2491
ACVRL1	20.3512	32.2262	33.3166	63.3424	119.266	59.1975	1.31296	0.00375731	0.0829164	26.2887	68.7805
ACY3	9.57705	3.39224	8.32916	0	0	12.0811	-0.526828	0.644132	NA	6.48464	5.10257
ACYP1	234.638	144.17	252.998	152.022	134.174	211.42	-0.00293115	0.990569	0.997176	189.404	187.653
ACYP2	84.9963	54.2758	98.9087	81.0782	52.1787	54.3651	0.0575642	0.866001	0.959355	69.636	71.6327
ADA	249.003	212.015	609.069	145.687	122.993	450.626	0.320576	0.377309	0.701034	230.509	332.094
ADAD2	2.39426	0	0	0	0	4.83245	0.30799	0.890891	NA	1.19713	1.20811
ADAL	152.036	132.297	135.349	115.283	89.4493	126.852	-0.279661	0.230495	0.574987	142.166	116.733
ADAM10	9981.68	10958.6	8172.98	10487	11997.4	9035.47	-0.0987414	0.53628	0.805273	10470.1	9923.2
ADAM11	5.98565	16.9612	17.6995	2.53369	12.4235	7.24868	-0.296493	0.696903	NA	11.4734	9.97633
ADAM12	47.8852	28.834	22.9052	26.6038	9.93881	14.4974	-0.990033	0.0807045	0.367873	38.3596	18.4863
ADAM15	1148.05	1265.3	1073.42	1223.77	954.126	726.076	-0.287329	0.264137	0.608143	1206.68	994.349
ADAM17	6817.66	12943.1	9188.1	6205.02	10512.8	6174.66	-0.260975	0.313381	0.652863	9880.37	8020.14
ADAM19	11681.6	18124.7	9048.59	7062.67	11873.1	12938.9	-0.51949	0.146123	0.470959	14903.2	10230.8
ADAM1A	240.623	215.407	371.689	160.89	260.894	210.212	0.111915	0.738208	0.908449	228.015	250.921
ADAM20	33.5197	22.0495	20.8229	15.2022	12.4235	16.9136	-0.758997	0.222183	0.567683	27.7846	16.3405
ADAM20P1	94.5733	81.4137	62.4687	58.275	67.087	59.1975	-0.518166	0.0816506	0.369251	87.9935	61.757
ADAM21	7.18279	3.39224	7.28801	0	6.21175	8.45679	0.0242451	0.976	NA	5.28751	5.48914
ADAM22	153.233	140.778	192.612	72.2103	91.934	95.4409	-0.425971	0.0898823	0.384599	147.005	113.049
ADAM23	56.2652	33.9224	38.5223	15.2022	11.1812	49.5326	-0.74856	0.348468	0.679151	45.0938	28.6096
ADAM28	7717.9	2567.92	2298.85	1193.37	3575.49	2553.95	-0.951718	0.0241156	0.20837	5142.91	2405.41
ADAM30	4.78852	1.69612	0	1.26685	0	0	-3.49745	0.0825446	NA	3.24232	0.316712
ADAM32	10.7742	25.4418	4.16458	8.86793	7.45411	7.24868	-1.31678	0.0986766	NA	18.108	6.93382
ADAM33	0	0	0	0	1.24235	0	0.430214	0.862961	NA	0	0.310588
ADAM8	6075.44	11269	5804.38	9047.82	9959.93	4852.99	-0.211303	0.53865	0.806464	8672.22	7416.28
ADAM9	3322.04	3901.07	2187.44	4292.08	7059.04	3516.82	0.110078	0.669281	0.874819	3611.56	4263.84
ADAMDEC1	26.3369	13.5689	17.6995	64.6092	77.0258	22.9541	0.903913	0.0928197	0.389913	19.9529	45.5721
ADAMTS1	83.7992	117.032	132.225	22.8032	36.0282	80.9435	-1.02627	0.0938236	0.392052	100.416	68.0001
ADAMTS10	95.7705	178.092	205.105	34.2049	24.847	78.5273	-1.24021	0.0170612	0.174624	136.931	85.6712
ADAMTS13	9.57705	8.48059	15.6172	16.469	14.9082	19.3298	0.890213	0.133546	0.454261	9.02882	16.581
ADAMTS14	2.39426	6.78447	30.1932	3.80054	4.9694	9.6649	1.1134	0.210793	NA	4.58937	12.157
ADAMTS15	1.19713	1.69612	0	0	0	0	-2.68103	0.355203	NA	1.44662	0
ADAMTS16	1.19713	0	4.16458	0	2.4847	2.41623	1.55913	0.300241	NA	0.598565	2.26638
ADAMTS17	29.9283	45.7952	58.3041	45.6065	24.847	15.7055	-0.0736971	0.914695	0.975021	37.8617	36.1158
ADAMTS2	2092.58	2243.96	1482.59	1659.57	2102.06	2436.76	-0.181924	0.858318	0.95611	2168.27	1920.25
ADAMTS3	9.57705	66.1486	0	5.06739	24.847	15.7055	-1.72773	0.160566	NA	37.8628	11.405
ADAMTS4	10.7742	11.8728	8.32916	3.80054	9.93881	0	-1.0157	0.166985	NA	11.3235	5.51713
ADAMTS5	53.8709	10.1767	2.08229	11.4016	8.69646	16.9136	-1.50636	0.0305732	0.234992	32.0238	9.77349
ADAMTS6	27.534	30.5301	43.7281	34.2049	73.2987	49.5326	0.804283	0.0922411	0.388902	29.0321	50.1911
ADAMTS7P1	0	6.78447	1.04114	1.26685	0	2.41623	-1.4792	0.322326	NA	3.39224	1.18105
ADAMTS8	7.18279	0	4.16458	1.26685	1.24235	0	-1.0621	0.348371	NA	3.59139	1.66844
ADAMTSL4	4935.77	8378.82	6140.67	7750.57	10189.8	8437.46	0.306417	0.2869	0.629126	6657.3	8129.62
ADAMTSL4-AS1	596.171	703.889	500.79	582.75	683.293	728.492	-0.0795214	0.785387	0.92616	650.03	623.831
ADAMTSL5	15.5627	11.8728	19.7817	16.469	6.21175	10.873	-0.0429441	0.947968	0.985638	13.7178	13.3339
ADAP1	515.963	1026.15	739.213	985.607	1074.63	639.092	0.174178	0.596769	0.842411	771.057	859.636
ADAP2	979.253	695.408	673.62	1702.64	1241.11	1222.61	0.423775	0.197688	0.540715	837.331	1210
ADAR	43170.9	56993	44709.9	81185.9	111738	77055.8	0.584003	0.00765733	0.120059	50081.9	78672.5
ADARB1	991.224	781.91	1068.21	813.316	940.46	492.91	-0.0837993	0.806379	0.935839	886.567	828.725
ADARB2	2.39426	703.889	307.138	666.362	1.24235	317.734	1.69557	0.433274	0.740654	353.142	323.119
ADAT1	993.619	1911.53	1083.83	874.124	977.73	920.582	-0.577326	0.0620827	0.330315	1452.57	964.067
ADAT2	926.579	581.769	973.47	444.663	488.244	484.453	-0.346941	0.0458115	0.284149	754.174	597.708
ADAT3	5.98565	16.9612	5.20572	22.8032	16.1506	10.873	0.270577	0.674161	NA	11.4734	13.7581
ADCK1	392.659	96.6787	415.417	177.359	84.4799	122.019	-0.182722	0.750297	0.912808	244.669	199.819
ADCK2	113.727	96.6787	181.159	125.418	144.113	101.481	0.398978	0.235763	0.580901	105.203	138.043
ADCK3	1322.83	1389.12	1049.47	1494.88	981.457	953.201	-0.28622	0.246707	0.591932	1355.98	1119.75
ADCK4	433.361	826.01	534.107	629.623	807.528	529.153	0.00709443	0.980488	0.994308	629.685	625.103
ADCK5	32.3225	18.6573	39.5635	35.4717	33.5435	25.3704	0.430666	0.428323	0.737402	25.4899	33.4873
ADCY1	3.59139	1.69612	4.16458	0	3.72705	0	-0.43186	0.77125	NA	2.64376	1.97291
ADCY10	69.4336	71.237	81.2093	35.4717	49.694	86.9841	-0.171423	0.66387	0.872887	70.3353	63.3398
ADCY10P1	3243.03	3393.93	2856.9	4596.12	3771.78	2831.82	0.0357887	0.866135	0.959355	3318.48	3514.15
ADCY3	199.921	305.301	352.948	755.041	713.109	332.231	1.0414	0.000819141	0.0372025	252.611	538.332
ADCY4	1520.36	1864.03	1019.28	2148.57	2144.3	1723.98	-0.035729	0.871531	0.960263	1692.2	1759.03
ADCY5	20.3512	8.48059	18.7406	6.33424	7.45411	8.45679	-0.462003	0.396537	0.715288	14.4159	10.2464
ADCY6	82.602	61.0603	31.2343	17.7359	8.69646	47.1164	-1.45408	0.0304465	0.234501	71.8311	26.1958
ADCY7	14067.5	15855.3	14185.6	16529.8	19514.8	16945	0.158553	0.158784	0.491312	14961.4	16793.8
ADCY9	162.81	137.386	195.735	182.426	223.623	172.76	0.377571	0.310166	0.650092	150.098	193.636
ADD1	9991.25	12369.8	10215.7	9717.98	13355.3	9544.09	-0.0624879	0.715859	0.898024	11180.5	10708.3
ADD2	57.4623	13.5689	36.4401	10.1348	55.9058	13.2892	0.0786518	0.927397	0.978734	35.5156	28.9425
ADD3	18845.2	25954	14990.4	15598.7	17953.2	16696.1	-0.454865	0.0865361	0.379884	22399.6	16309.6
ADD3-AS1	98.1647	100.071	43.7281	89.9461	78.2681	65.2381	-0.577688	0.221323	0.567178	99.1179	69.2951
ADGB	52.6738	66.1486	1.04114	38.0054	37.2705	26.5785	-1.60496	0.0427336	0.275369	59.4112	25.7239
ADGRA2	37.1111	62.7564	98.9087	30.4043	86.9646	91.8166	0.576101	0.282331	0.625066	49.9337	77.0235
ADGRA3	13.1684	42.403	67.6744	13.9353	24.847	24.1623	0.0308375	0.96098	0.989489	27.7857	32.6547
ADGRB1	19.1541	11.8728	6.24687	16.469	6.21175	14.4974	-0.567903	0.361907	0.68894	15.5135	10.8562
ADGRB2	4.78852	16.9612	8.32916	2.53369	1.24235	1.20811	-1.77073	0.0236395	NA	10.8749	3.32833
ADGRB3	38.3082	13.5689	0	5.06739	3.72705	3.62434	-2.65593	0.0327813	NA	25.9386	3.10469
ADGRD1	16.7598	10.1767	34.3578	26.6038	11.1812	25.3704	0.902848	0.0991737	0.401884	13.4683	24.3783
ADGRE1	709.899	4934.01	974.511	3216.52	7040.4	1092.13	0.161581	0.780044	0.923713	2821.95	3080.89
ADGRE2	11391.9	34058.1	8759.15	15339	29927	10658	-0.445737	0.191365	0.535282	22725	16170.8
ADGRE3	7155.25	15680.6	6082.37	7854.45	4775.6	7544.66	-0.699772	0.0887819	0.382547	11417.9	6564.27
ADGRE4P	331.605	325.655	1529.44	186.227	1745.5	135.309	1.45785	0.136035	0.457739	328.63	899.12
ADGRE5	18474.1	60926.3	41027.3	37350.5	45373.1	23855.4	-0.0231332	0.958228	0.98846	39700.2	36901.6
ADGRF3	79.0106	28.834	66.6332	63.3424	67.087	80.9435	0.424637	0.289884	0.631563	53.9223	69.5015
ADGRG1	658.422	1141.49	1936.53	277.44	285.741	782.857	-0.6804	0.236379	0.581289	899.955	820.641
ADGRG2	46.6881	62.7564	27.0698	60.8087	54.6634	62.8219	-0.154838	0.68759	0.884011	54.7222	51.3409
ADGRG3	13593.4	38067.7	11288.1	26436.6	29866.1	21512.9	-0.150986	0.683805	0.881275	25830.5	22275.9
ADGRG5	252.595	312.086	535.148	98.8141	144.113	419.215	-0.178072	0.69867	0.890061	282.34	299.323
ADGRG6	2.39426	8.48059	1.04114	3.80054	3.72705	1.20811	-1.16057	0.202992	NA	5.43743	2.44421
ADGRL1	441.741	498.659	515.366	483.936	446.004	408.342	-0.0286592	0.923341	0.976813	470.2	463.412
ADGRL2	80.2078	0	0	6.33424	1.24235	1.20811	-2.84615	0.171789	NA	40.1039	2.19617
ADGRV1	86.1934	33.9224	22.9052	44.3396	37.2705	53.157	-0.63733	0.244572	0.589989	60.0579	39.4181
ADH1A	0	0	2.08229	0	0	0	0.73879	0.816474	NA	0	0.520572
ADH4	3.59139	0	6.24687	6.33424	0	4.83245	1.51381	0.390419	NA	1.7957	4.35339
ADH5	1359.94	1138.1	1440.94	1517.68	1197.63	1414.7	0.158324	0.290148	0.631607	1249.02	1392.74
ADH6	10.7742	1.69612	20.8229	1.26685	4.9694	12.0811	0.471237	0.480789	0.771681	6.23515	9.78507
ADHFE1	389.068	493.57	545.56	271.105	206.23	345.52	-0.460223	0.127226	0.44505	441.319	342.104
ADI1	1343.18	1380.64	1426.37	1370.73	1196.38	1221.4	-0.0628734	0.61343	0.848833	1361.91	1303.72
ADIPOR1	24465.8	34834.9	13077.8	19257.3	15480.9	16552.4	-0.880007	0.000124868	0.0140179	29650.3	16092.1
ADIPOR2	3420.2	2886.79	3282.73	3406.55	4063.73	3219.62	0.145432	0.400149	0.71833	3153.5	3493.16
ADIRF	8.37992	3.39224	9.3703	1.26685	3.72705	7.24868	-0.0557	0.942262	NA	5.88608	5.40322
ADK	770.952	558.023	402.923	304.043	703.171	695.873	-0.315812	0.440064	0.745345	664.488	526.502
ADM	2181.17	3809.48	1268.11	7616.28	6537.25	1975.26	0.0517482	0.911962	0.973767	2995.33	4349.23
ADM2	40.7025	91.5904	37.4812	110.216	64.6022	47.1164	-0.0173217	0.972318	0.992369	66.1464	64.8539
ADM5	32.3225	35.6185	40.6046	26.6038	22.3623	14.4974	-0.390973	0.347703	0.678675	33.9705	26.017
ADNP	4508.4	5860.09	4640.38	4607.52	5091.15	4954.47	-0.100349	0.434069	0.74119	5184.24	4823.38
ADNP-AS1	324.422	564.807	319.631	368.652	359.039	410.758	-0.234534	0.0815939	0.369251	444.615	364.52
ADNP2	1283.32	1925.09	1471.14	1520.22	1249.81	1447.32	-0.140615	0.489706	0.776841	1604.21	1422.12
ADO	460.895	483.394	563.259	497.871	495.698	490.494	0.116902	0.473607	0.767115	472.145	511.83
ADORA1	0	0	0	0	1.24235	0	0.420865	0.893481	NA	0	0.310588
ADORA2A	52.6738	400.284	63.5098	96.2804	119.266	91.8166	-0.818838	0.222891	0.568281	226.479	92.7181
ADORA2A-AS1	125.699	858.236	179.077	255.903	296.922	239.206	-0.543464	0.378919	0.701936	491.967	242.777
ADORA2B	34.7168	39.0107	49.9749	49.407	28.5741	53.157	0.304878	0.390279	0.710335	36.8638	45.2782
ADORA3	435.756	195.054	246.751	68.4097	161.506	276.658	-0.666059	0.296581	0.635932	315.405	188.331
ADPGK	7884.3	9233.67	6493.62	8408.06	7486.41	7572.45	-0.201541	0.00734812	0.117178	8558.99	7490.13
ADPGK-AS1	116.122	156.043	95.7853	126.685	172.687	142.557	-0.0371462	0.878648	0.96266	136.082	134.429
ADPRH	373.505	230.672	288.397	661.294	797.589	489.286	0.805741	0.005037	0.0953901	302.088	559.142
ADPRHL1	40.7025	13.5689	14.576	25.3369	6.21175	36.2434	-0.434858	0.542869	0.80889	27.1357	20.592
ADPRHL2	411.813	437.598	774.611	755.041	644.78	566.605	0.687757	0.00469995	0.0931387	424.706	685.259
ADPRM	642.859	376.538	558.053	521.941	581.42	547.275	0.16473	0.564989	0.822814	509.699	552.172
ADRA2A	19.1541	49.1874	21.864	19.0027	21.12	33.8272	-0.447528	0.451034	0.753253	34.1708	23.9535
ADRA2B	5.98565	6.78447	1.04114	2.53369	2.4847	3.62434	-1.54309	0.282864	NA	6.38506	2.42097
ADRB1	15.5627	5.08835	27.0698	39.2723	24.847	6.04056	1.28448	0.193615	0.536262	10.3255	24.3074
ADRB2	1422.19	883.678	466.433	386.388	395.068	422.839	-1.45551	1.0448e-09	2.38955e-06	1152.93	417.682
ADRBK1	8496.04	12402	8630.05	12605.1	15534.4	9515.09	0.128381	0.580175	0.832843	10449	11571.2
ADRBK2	3779.34	2211.74	2625.77	4945.77	3661.21	3669.04	0.284907	0.301432	0.640591	2995.54	3725.45
ADRM1	401.039	505.443	482.05	717.035	606.267	529.153	0.349181	0.112364	0.423442	453.241	583.626
ADSL	1268.96	971.876	1659.58	1301.05	1160.36	1418.32	0.311068	0.0197742	0.187836	1120.42	1384.83
ADSS	2797.7	3066.58	2645.55	2837.74	2382.83	2075.54	-0.241071	0.386564	0.707587	2932.14	2485.41
ADSSL1	26.3369	8.48059	15.6172	21.5364	14.9082	9.6649	-0.0662477	0.906819	0.972648	17.4087	15.4317
ADTRP	119.713	127.209	903.713	243.235	118.023	128.06	1.25557	0.0076399	0.120006	123.461	348.258
AEBP1	143.656	35.6185	108.279	34.2049	192.564	28.9947	0.15463	0.818748	0.94149	89.6371	91.0107
AEBP2	1106.15	1175.41	1223.34	904.529	901.947	897.628	-0.219084	0.157894	0.489676	1140.78	981.862
AEN	622.508	535.973	641.345	340.782	449.731	634.259	-0.178562	0.464076	0.76042	579.241	516.529
AES	2088.99	1212.72	3275.44	2118.17	1868.5	1964.39	0.518694	0.0118987	0.147936	1650.86	2306.62
AFAP1	405.827	695.408	532.025	449.731	330.465	279.074	-0.47365	0.299178	0.638595	550.618	397.824
AFAP1-AS1	32.3225	39.0107	20.8229	13.9353	4.9694	24.1623	-1.16152	0.0902425	0.384599	35.6666	15.9725
AFAP1L1	13.1684	1.69612	1.04114	13.9353	3.72705	14.4974	0.0769323	0.950497	NA	7.43228	8.30022
AFAP1L2	56.2652	81.4137	72.8801	45.6065	55.9058	33.8272	-0.439777	0.322831	0.660469	68.8394	52.0549
AFF1	8140.49	10807.7	7991.82	13222.1	20182	13413.7	0.483499	0.0259176	0.217075	9474.08	13702.4
AFF2	167.598	162.827	256.122	200.162	401.279	233.166	0.710759	0.139188	0.461792	165.213	272.682
AFF3	911.017	133.993	290.479	103.881	677.081	144.974	-0.684296	0.310669	0.650689	522.505	304.104
AFF4	9841.61	10821.2	7483.75	7445.26	10223.3	9521.14	-0.262536	0.0919289	0.388467	10331.4	8668.36
AFG3L1P	1112.13	868.413	1073.42	895.661	773.985	816.684	-0.143985	0.459851	0.758967	990.274	889.937
AFG3L2	688.35	413.853	760.035	656.227	565.27	776.816	0.345609	0.033313	0.244661	551.102	689.587
AFMID	250.2	101.767	194.694	184.96	181.383	276.658	0.315135	0.366854	0.694478	175.984	209.424
AFTPH	7155.25	7483.27	5962.63	7797.44	7595.73	7373.11	-0.0460289	0.747717	0.912495	7319.26	7182.23
AGA	482.444	347.704	411.252	282.507	460.912	453.042	-0.0396431	0.861634	0.956947	415.074	401.928
AGAP1	61.0537	110.248	193.653	22.8032	21.12	57.9894	-0.852106	0.139867	0.462186	85.6507	73.8914
AGAP11	9.57705	0	4.16458	2.53369	3.72705	3.62434	-0.0595284	0.957496	NA	4.78852	3.51242
AGAP2	2030.33	4513.37	1578.37	1663.37	2038.7	1679.28	-0.859471	0.00249314	0.0668807	3271.85	1739.93
AGAP3	229.849	227.28	305.055	463.666	228.593	167.928	0.32364	0.342075	0.675682	228.564	291.31
AGAP4	143.656	281.556	36.4401	160.89	21.12	109.938	-1.35071	0.0152402	0.165634	212.606	82.097
AGAP5	234.638	123.817	153.048	169.758	172.687	222.293	0.0351846	0.877237	0.961961	179.227	179.446
AGAP6	682.365	361.273	647.592	449.731	506.879	414.383	0.00969714	0.959288	0.988773	521.819	504.646
AGAP7P	397.447	810.744	1523.19	358.518	286.983	381.764	-0.309466	0.633901	0.858181	604.096	637.615
AGAP9	46.6881	32.2262	47.8926	34.2049	43.4823	27.7866	-0.0413813	0.934028	0.981245	39.4572	38.3416
AGBL2	132.882	76.3253	108.279	57.0081	111.812	73.6949	-0.217155	0.506886	0.787872	104.603	87.6984
AGBL3	43.0967	57.668	52.0572	12.6685	27.3317	48.3245	-0.592088	0.122232	0.439489	50.3824	35.0955
AGBL4	3.59139	3.39224	0	1.26685	0	0	-3.28969	0.124487	NA	3.49181	0.316712
AGBL5	555.469	490.178	530.984	554.879	523.03	527.945	0.0292721	0.858217	0.95611	522.823	534.209
AGER	2808.47	3653.44	2460.22	3970.3	3155.57	2029.63	-0.180166	0.387944	0.708811	3230.95	2903.93
AGFG1	20606.2	32178.8	13092.4	14610.5	23961.2	19793.7	-0.55951	0.0204202	0.191058	26392.5	17864.5
AGFG2	181.964	89.8943	127.02	108.949	83.2375	90.6084	-0.378703	0.0817068	0.369251	135.929	102.454
AGGF1	1678.38	1300.92	1301.43	1565.82	1672.2	1513.77	0.0216016	0.88004	0.963408	1489.65	1513.31
AGK	823.626	663.182	1044.27	501.671	489.486	759.903	-0.119935	0.419013	0.730304	743.404	698.832
AGL	1308.46	1175.41	1188.99	914.664	1234.9	1007.57	-0.187156	0.300584	0.639787	1241.94	1086.53
AGMAT	65.8422	45.7952	185.324	51.9407	49.694	78.5273	0.589128	0.114908	0.426681	55.8187	91.3714
AGMO	20.3512	15.2651	7.28801	5.06739	8.69646	12.0811	-1.09695	0.269994	NA	17.8081	8.28325
AGO1	4589.8	5179.94	3026.61	4938.17	4775.6	4865.07	-0.183674	0.246922	0.591932	4884.87	4401.36
AGO2	1405.43	2362.69	1176.49	1567.09	2124.42	1134.42	-0.32328	0.228572	0.573041	1884.06	1500.61
AGO3	915.805	1009.19	766.282	907.062	1070.91	971.323	-0.0580069	0.717404	0.899245	962.498	928.893
AGO4	33353.3	51204.1	26735.5	34714.1	32327.2	30976	-0.421527	0.113531	0.425541	42278.7	31188.2
AGPAT1	2339.19	2271.1	2267.61	1885.07	2221.32	2162.52	-0.111604	0.607279	0.846442	2305.15	2134.13
AGPAT2	93.3762	198.446	183.241	219.165	238.531	141.349	0.4814	0.246409	0.591651	145.911	195.572
AGPAT3	798.486	639.437	1186.9	1748.25	1397.64	965.282	0.865312	0.000132598	0.0144606	718.961	1324.52
AGPAT4	954.113	1226.29	1781.4	832.319	556.573	918.166	-0.237492	0.501927	0.785256	1090.2	1022.11
AGPAT4-IT1	43.0967	59.3641	72.8801	31.6712	50.9364	43.4921	-0.120868	0.807251	0.935912	51.2304	49.7449
AGPAT5	439.347	162.827	317.549	198.895	280.771	251.287	-0.0689394	0.856255	0.955692	301.087	262.126
AGPAT6	4242.63	8809.64	3180.7	4384.56	3423.92	4223.56	-0.714863	0.00324543	0.0760082	6526.13	3803.18
AGPAT9	3420.2	5039.17	2576.83	5318.22	3479.82	3312.64	-0.237726	0.425546	0.735769	4229.69	3671.88
AGPS	1727.46	1326.36	2095.82	1826.79	1854.83	1872.57	0.334039	0.0918896	0.388467	1526.91	1912.51
AGRN	20.3512	16.9612	30.1932	143.154	136.659	44.7002	2.14657	0.0165836	0.171741	18.6562	88.6764
AGRP	3.59139	0	1.04114	5.06739	6.21175	2.41623	1.60364	0.300801	NA	1.7957	3.68413
AGTPBP1	16570.7	29059.6	14443.8	18969.8	20073.9	14829.6	-0.385436	0.056918	0.314522	22815.1	17079.3
AGTRAP	3147.26	5190.12	3058.88	6393.78	5627.85	3363.39	0.105494	0.733762	0.906448	4168.69	4610.97
AHCTF1	12487.3	21508.5	10548.9	13584.4	11681.8	12073.9	-0.462308	0.0533708	0.305049	16997.9	11972.2
AHCTF1P1	37.1111	78.0214	40.6046	22.8032	17.3929	16.9136	-1.1814	0.0282336	0.226804	57.5662	24.4286
AHCY	557.863	432.51	736.089	591.618	650.992	866.217	0.53119	0.00448721	0.0902394	495.187	711.229
AHCYL1	2670.8	3185.31	2693.44	2871.94	2902.13	2382.4	-0.114975	0.524627	0.798348	2928.05	2712.48
AHCYL2	780.529	612.299	823.545	637.224	638.568	618.554	-0.0259361	0.854535	0.954954	696.414	679.473
AHDC1	43.0967	61.0603	92.6619	36.7386	54.6634	48.3245	0.118122	0.731354	0.905077	52.0785	58.0971
AHI1	114.925	128.905	149.925	91.213	81.9952	286.323	0.310028	0.525671	0.79871	121.915	152.364
AHNAK	73385.3	65500.7	83966.2	91016.6	57144.4	62848.4	0.0805792	0.673637	0.877278	69443	73743.9
AHNAK2	19.1541	3.39224	16.6583	2.53369	139.143	3.62434	1.26744	0.230253	0.574748	11.2732	40.4899
AHR	6715.9	9720.45	6175.03	18559.3	7127.37	9892.03	0.255122	0.662531	0.872064	8218.18	10438.4
AHRR	53.8709	37.3146	20.8229	79.8114	53.4211	64.03	0.0387656	0.947147	0.985487	45.5927	54.5213
AHSA1	1449.73	1287.35	1488.84	1459.41	1303.23	1327.72	0.02661	0.788664	0.928302	1368.54	1394.8
AHSA2	4498.82	3904.46	3850.15	4176.79	4135.79	3572.39	-0.0858938	0.712147	0.896378	4201.64	3933.78
AHSP	28.7311	44.0991	24.9875	268.572	26.0894	7.24868	0.810446	0.406469	0.722901	36.4151	81.7243
AICDA	37.1111	37.3146	29.152	5.06739	19.8776	41.0758	-0.716398	0.257332	0.601354	37.2128	23.7932
AIDA	1188.75	797.176	1360.78	1301.05	1739.29	1297.51	0.541929	0.0078642	0.121503	992.963	1424.66
AIF1	18711.2	21143.8	13332.9	24033.4	13888.2	13776.1	-0.335412	0.131194	0.45049	19927.5	16257.6
AIF1L	3.59139	3.39224	18.7406	8.86793	3.72705	2.41623	1.29424	0.158921	NA	3.49181	8.43795
AIFM1	714.687	520.708	650.715	762.642	719.321	823.933	0.259315	0.173116	0.5105	617.698	739.153
AIFM2	107.742	54.2758	91.6207	53.2076	99.3881	114.771	0.200587	0.533279	0.803883	81.0088	89.7468
AIFM3	37.1111	30.5301	62.4687	108.949	75.7834	94.2328	1.30111	0.00124936	0.0462078	33.8206	85.3584
AIG1	602.157	866.716	550.765	665.095	504.394	862.592	-0.164333	0.580372	0.832843	734.437	645.712
AIM1	10331.2	9349	6069.87	7950.73	9995.96	8430.21	-0.309455	0.0525587	0.3031	9840.12	8111.69
AIM1L	96.9676	147.562	82.2504	51.9407	105.6	78.5273	-0.606445	0.171944	0.509255	122.265	79.5796
AIM2	1019.96	1975.98	1648.13	3259.6	5815.44	3270.36	1.17572	0.00472556	0.0933985	1497.97	3498.38
AIMP1	1110.94	734.419	1133.81	1097.09	862.192	1012.4	0.171832	0.237082	0.581782	922.678	1026.37
AIMP2	80.2078	50.8835	54.1395	84.8788	49.694	74.903	0.00700995	0.980895	0.99438	65.5457	65.9038
AIP	426.179	556.327	688.196	728.437	593.844	561.772	0.38282	0.172625	0.509856	491.253	643.062
AIRE	1.19713	1.69612	2.08229	3.80054	1.24235	4.83245	1.18475	0.409623	NA	1.44662	2.98941
AIRN	25.1397	71.237	23.9463	26.6038	39.7552	31.4109	-0.568636	0.265296	0.608823	48.1884	30.4291
AJAP1	0	0	1.04114	0	0	0	0.455558	0.81588	NA	0	0.260286
AJUBA	64.6451	42.403	41.6458	55.7413	79.5105	32.619	-0.148529	0.753187	0.913335	53.524	52.3791
AK1	122.107	186.573	329.002	88.6793	78.2681	79.7354	-0.331354	0.477695	0.770162	154.34	143.921
AK2	3007.19	2109.97	3152.59	3898.09	3107.12	2880.14	0.348871	0.0169499	0.173946	2558.58	3259.48
AK3	973.267	702.193	1313.92	567.547	755.349	1000.32	0.0991718	0.610583	0.847814	837.73	909.285
AK4	31.1254	49.1874	80.1681	127.952	180.141	79.7354	1.50441	0.00116719	0.0447184	40.1564	116.999
AK5	37.1111	72.9331	120.773	40.5391	33.5435	31.4109	-0.21111	0.715241	0.897804	55.0221	56.5666
AK6	122.107	81.4137	107.238	98.8141	73.2987	120.811	-0.0068851	0.978574	0.994143	101.761	100.04
AK7	4.78852	3.39224	0	0	1.24235	1.20811	-2.82818	0.0745306	NA	4.09038	0.612616
AK8	5.98565	1.69612	4.16458	1.26685	19.8776	0	0.894832	0.495679	NA	3.84089	6.32726
AK9	630.888	619.083	553.889	575.149	588.874	624.594	-0.0952948	0.550715	0.814812	624.986	585.626
AKAP1	434.559	203.534	458.104	241.968	282.014	433.712	0.209791	0.34001	0.67451	319.046	353.949
AKAP10	4271.36	5220.65	3520.11	5646.34	4466.25	5623.76	0.0028854	0.986778	0.995813	4746.01	4814.12
AKAP11	2387.08	1211.03	2395.67	1316.25	1869.74	1417.12	0.0224832	0.918837	0.975655	1799.05	1749.7
AKAP12	9.57705	11.8728	15.6172	8.86793	28.5741	10.873	0.598883	0.489838	0.776898	10.7249	15.983
AKAP13	26691.2	47710.1	32908.5	31781.4	46642.8	44467	0.0888393	0.657038	0.868939	37200.7	38949.9
AKAP14	3.59139	6.78447	9.3703	7.60108	4.9694	2.41623	0.288402	0.774986	NA	5.18793	6.08925
AKAP3	28.7311	1.69612	9.3703	8.86793	18.6353	18.1217	0.2068	0.796803	0.931698	15.2136	13.7488
AKAP5	113.727	86.502	255.08	46.8733	36.0282	199.339	0.128956	0.805712	0.935791	100.115	134.33
AKAP6	19.1541	1.69612	15.6172	6.33424	14.9082	2.41623	0.117223	0.888722	0.965937	10.4251	9.81896
AKAP7	228.652	139.082	285.274	201.429	171.444	189.674	0.238472	0.526315	0.798883	183.867	211.955
AKAP8	1519.16	2384.74	1957.35	2534.96	1895.83	2202.39	0.169281	0.281816	0.624537	1951.95	2147.63
AKAP8L	2585.8	3395.63	2932.9	3162.05	2808.96	2407.77	-0.0739427	0.622696	0.853182	2990.72	2827.92
AKAP9	5451.73	4382.77	4117.73	4654.4	5199.24	5225.09	-0.0324206	0.853013	0.954307	4917.25	4799.11
AKIP1	81.4049	59.3641	96.8264	83.6119	57.1481	70.0705	0.141599	0.618791	0.85182	70.3845	76.9143
AKIRIN1	8156.05	11806.7	7072.49	8821.06	8995.86	8351.68	-0.256109	0.0531481	0.304618	9981.37	8310.27
AKIRIN2	7183.98	10521	6437.4	8134.43	8123.73	6215.74	-0.282565	0.170798	0.507673	8852.5	7227.82
AKNA	16242.7	22682.2	15615.1	16026.9	20336	16003.9	-0.190977	0.402121	0.71945	19462.4	16995.5
AKNAD1	1.19713	1.69612	1.04114	0	4.9694	6.04056	1.0779	0.512838	NA	1.44662	3.01278
AKR1A1	1189.95	620.779	1140.05	1460.67	1279.62	1537.93	0.602981	0.0341643	0.248048	905.364	1354.57
AKR1B1	563.849	430.814	697.567	510.539	484.517	704.33	0.276754	0.0619104	0.330071	497.331	599.238
AKR1C1	41.8996	22.0495	14.576	53.2076	32.3011	20.5379	-0.380735	0.443107	0.747786	31.9746	30.1557
AKR1C2	9.57705	10.1767	15.6172	1.26685	3.72705	4.83245	-0.762252	0.375351	NA	9.87688	6.36088
AKR1C3	263.369	300.213	300.891	288.841	359.039	260.952	0.0849941	0.823197	0.943618	281.791	302.431
AKR1C4	63.4479	62.7564	52.0572	88.6793	28.5741	61.6137	-0.127709	0.804524	0.935429	63.1022	57.7311
AKR1C6P	1.19713	0	4.16458	1.26685	6.21175	0	2.09254	0.246678	NA	0.598565	2.91079
AKR1C8P	23.9426	11.8728	27.0698	40.5391	11.1812	18.1217	0.443181	0.514644	0.792387	17.9077	24.2279
AKR1E2	31.1254	15.2651	24.9875	27.8706	6.21175	21.746	-0.219314	0.702012	0.891745	23.1952	20.204
AKR7A2	152.036	94.9826	185.324	167.224	142.87	135.309	0.372003	0.0728029	0.352502	123.509	157.682
AKR7A2P1	5.98565	1.69612	6.24687	6.33424	7.45411	15.7055	1.07564	0.270475	NA	3.84089	8.93517
AKR7A3	10.7742	3.39224	7.28801	1.26685	8.69646	1.20811	-0.569363	0.50947	NA	7.08321	4.61486
AKR7L	13.1684	11.8728	11.4526	13.9353	8.69646	20.5379	0.1159	0.841819	0.949735	12.5206	13.6556
AKT1	3442.95	3667.01	4113.56	3647.25	3763.08	3449.16	0.0675107	0.852173	0.953581	3554.98	3743.26
AKT1S1	266.96	446.079	387.306	438.329	273.317	289.947	-0.0120286	0.963873	0.99025	356.52	347.225
AKT2	2450.53	3030.96	2979.76	3099.97	3041.28	2370.32	0.0711787	0.764969	0.916834	2740.75	2872.83
AKT3	773.347	741.204	745.459	263.504	521.787	474.788	-0.644541	0.0108289	0.14181	757.275	501.385
AKTIP	2794.1	3161.56	1490.92	1755.85	1802.65	1745.72	-0.817893	0.000372115	0.0243766	2977.83	1698.79
ALAD	1392.26	1407.78	1275.4	1309.92	1330.56	1255.23	-0.118225	0.361254	0.688152	1400.02	1292.78
ALAS1	4540.72	1857.25	1730.38	3461.03	3671.15	2112.99	-0.376372	0.279212	0.622963	3198.98	2743.89
ALAS2	138.867	625.868	120.773	4797.55	98.1457	35.0353	1.17432	0.335985	0.67179	382.367	1262.88
ALB	9.57705	1.69612	4.16458	1.26685	2.4847	1.20811	-1.26652	0.213428	NA	5.63658	2.28106
ALCAM	1375.5	1429.83	2190.57	1070.49	2519.49	1077.64	0.287669	0.422064	0.732946	1402.67	1714.54
ALDH16A1	250.2	227.28	233.216	198.895	200.018	247.663	-0.106613	0.691649	0.886049	238.74	219.948
ALDH18A1	480.05	237.457	485.173	217.898	253.44	771.984	0.296824	0.398106	0.716513	358.753	432.124
ALDH1A1	893.06	252.722	238.422	1657.04	695.717	555.732	0.291877	0.583193	0.834265	572.891	786.727
ALDH1A2	81.4049	127.209	32.2755	76.0108	38.5129	100.273	-0.752142	0.154513	0.484824	104.307	61.7681
ALDH1A3	22.7455	22.0495	5.20572	12.6685	18.6353	21.746	-0.724868	0.216006	0.561316	22.3975	14.5639
ALDH1B1	39.5053	30.5301	46.8515	25.3369	22.3623	106.314	0.511835	0.395125	0.714411	35.0177	50.2162
ALDH1L2	114.925	23.7457	34.3578	58.275	69.5717	158.263	0.284826	0.689304	0.884767	69.3351	80.1168
ALDH2	2679.18	2925.8	3239	5506.98	4004.1	2479.05	0.3933	0.151862	0.479831	2802.49	3807.28
ALDH3A2	870.314	508.835	992.211	857.655	908.159	912.125	0.449108	0.00530135	0.0983864	689.575	917.537
ALDH3B1	1169.6	1251.74	1165.04	1475.88	1357.89	1227.44	0.0941073	0.647225	0.863764	1210.67	1306.56
ALDH4A1	98.1647	101.767	107.238	108.949	141.628	112.354	0.227687	0.615507	0.849756	99.9659	117.542
ALDH5A1	263.369	125.513	199.9	122.884	134.174	96.649	-0.431476	0.138858	0.461614	194.441	138.402
ALDH6A1	153.233	139.082	240.504	120.35	122.993	167.928	0.142852	0.506764	0.787872	146.157	162.944
ALDH7A1	46.6881	0	17.6995	8.86793	14.9082	6.04056	-0.307886	0.721733	0.901085	23.3441	11.879
ALDH8A1	51.4766	55.9719	38.5223	41.806	43.4823	54.3651	-0.26561	0.484075	0.773021	53.7243	44.5439
ALDH9A1	1989.63	2221.91	2491.46	2298.06	2074.73	2276.08	0.119466	0.396171	0.715123	2105.77	2285.08
ALDOA	12948.2	20448.4	12744.6	18141.2	14829.9	13231.2	-0.174723	0.474377	0.767531	16698.3	14736.8
ALDOB	34.7168	22.0495	23.9463	6.33424	6.21175	8.45679	-1.49268	0.0340664	0.24777	28.3832	11.2373
ALDOC	367.519	383.323	298.808	310.378	421.157	256.12	-0.228019	0.339956	0.67451	375.421	321.616
ALG1	90.982	39.0107	91.6207	81.0782	53.4211	181.217	0.707804	0.0606136	0.326727	64.9963	101.834
ALG10	263.369	206.926	217.599	159.623	250.955	283.906	-0.021539	0.933225	0.980953	235.148	228.021
ALG10B	849.963	496.963	793.352	315.445	572.724	482.037	-0.316043	0.117581	0.43114	673.463	540.889
ALG11	162.81	179.789	197.817	235.634	263.378	328.607	0.574317	0.0265528	0.219686	171.299	256.359
ALG12	187.95	228.976	237.381	230.566	233.562	218.668	0.143787	0.63563	0.859076	208.463	230.044
ALG13	1872.31	1562.12	2008.37	1290.92	1461	1264.89	-0.189947	0.292015	0.633554	1717.22	1506.3
ALG14	106.545	61.0603	78.0858	77.2777	63.3599	173.968	0.248529	0.530177	0.801326	83.8025	98.1729
ALG1L	0	0	0	0	3.72705	2.41623	2.40293	0.269426	NA	0	1.53582
ALG1L2	4.78852	16.9612	2.08229	6.33424	2.4847	13.2892	-0.703288	0.431143	NA	10.8749	6.04762
ALG1L9P	22.7455	6.78447	16.6583	8.86793	4.9694	4.83245	-0.704714	0.266563	0.610045	14.765	8.83202
ALG2	395.053	332.439	471.638	373.72	434.823	544.859	0.33259	0.0969783	0.398419	363.746	456.26
ALG3	164.007	156.043	226.969	215.364	168.96	271.825	0.467103	0.0230486	0.203658	160.025	220.78
ALG5	464.487	252.722	372.73	437.062	270.833	687.416	0.319487	0.32771	0.662873	358.604	442.01
ALG6	1295.3	1346.72	992.211	1149.03	1151.66	1257.65	-0.221452	0.208694	0.55201	1321.01	1137.64
ALG8	359.139	173.004	364.401	305.31	289.468	407.134	0.406988	0.0538723	0.306543	266.072	341.578
ALG9	453.713	208.623	401.882	217.898	249.713	465.123	0.0543811	0.820564	0.94212	331.168	333.654
ALK	13.1684	0	6.24687	10.1348	16.1506	8.45679	0.653451	0.388124	NA	6.58422	10.2472
ALKBH1	235.835	232.368	251.957	292.642	351.585	230.75	0.253853	0.259417	0.604148	234.101	281.733
ALKBH2	95.7705	94.9826	107.238	57.0081	81.9952	100.273	-0.133661	0.553722	0.816206	95.3765	86.6286
ALKBH3	269.354	193.357	336.29	212.83	206.23	225.917	0.0949782	0.560519	0.820154	231.356	245.317
ALKBH3-AS1	9.57705	5.08835	7.28801	6.33424	13.6659	3.62434	0.101375	0.875912	0.961726	7.3327	7.72811
ALKBH4	336.394	729.331	405.005	374.987	444.762	231.958	-0.472064	0.254958	0.598897	532.862	364.178
ALKBH5	1965.69	2450.89	2289.48	2294.26	1829.98	1861.7	-0.0841311	0.559492	0.819733	2208.29	2068.86
ALKBH6	682.365	673.359	697.567	734.771	812.498	591.975	0.0557015	0.680478	0.879651	677.862	709.203
ALKBH7	25.1397	40.7068	42.6869	49.407	26.0894	36.2434	0.272527	0.58912	0.837688	32.9233	38.6067
ALKBH8	287.311	145.866	318.59	244.501	193.807	305.652	0.328498	0.115165	0.427419	216.589	265.638
ALMS1	634.479	334.135	634.057	552.345	408.733	664.462	0.259379	0.191722	0.535282	484.307	564.899
ALMS1-IT1	77.8135	72.9331	68.7155	84.8788	36.0282	76.1111	-0.18257	0.6344	0.85843	75.3733	66.4334
ALMS1P	8.37992	1.69612	6.24687	8.86793	99.3881	7.24868	2.24391	0.0467945	0.28695	5.03802	30.4379
ALOX12	1187.55	1390.82	852.697	1432.8	742.926	1656.32	-0.149507	0.669966	0.8751	1289.19	1171.19
ALOX12-AS1	183.161	201.838	138.472	188.76	168.96	198.13	-0.15367	0.490556	0.777008	192.5	173.581
ALOX12B	11.9713	3.39224	7.28801	5.06739	6.21175	3.62434	-0.39929	0.596063	NA	7.68177	5.54787
ALOX12P2	40.7025	39.0107	21.864	25.3369	36.0282	21.746	-0.556572	0.268547	0.611496	39.8566	26.2438
ALOX15	0	23.7457	66.6332	7.60108	4.9694	3.62434	0.0419614	0.976361	0.993441	11.8728	20.707
ALOX15B	1112.13	1219.51	279.027	146.954	357.797	532.778	-1.82953	0.0232319	0.204151	1165.82	329.139
ALOX15P1	31.1254	6.78447	31.2343	13.9353	17.3929	13.2892	0.0662823	0.900925	0.970977	18.9549	18.963
ALOX5	24841.7	47683	20463.7	36482.7	41680.9	26277.7	-0.214235	0.282594	0.625271	36262.3	31226.2
ALOX5AP	45554.4	68441.8	36428.6	30230.8	47859.1	37701.6	-0.553342	0.157591	0.489519	56998.1	38055
ALOXE3	4.78852	1.69612	5.20572	1.26685	0	0	-1.23211	0.413097	NA	3.24232	1.61814
ALPK1	16553.9	28584.7	11047.6	24644	30450	18029.9	-0.193409	0.482325	0.772023	22569.3	21042.9
ALPK2	13.1684	3.39224	2.08229	12.6685	11.1812	1.20811	-0.569903	0.536716	0.805551	8.28034	6.78501
ALPK3	380.688	239.153	82.2504	288.841	286.983	291.155	-0.637769	0.107706	0.416079	309.92	237.307
ALPL	6288.53	29392	7381.71	22098.9	20321.1	9047.56	-0.0170522	0.97372	0.992451	17840.3	14712.3
ALS2	1206.71	1029.54	1033.86	905.796	1023.7	955.617	-0.193856	0.306196	0.646486	1118.13	979.742
ALS2CL	102.953	47.4913	272.78	148.221	63.3599	71.2786	0.905329	0.111856	0.422217	75.2223	138.91
ALS2CR11	22.7455	6.78447	18.7406	5.06739	6.21175	13.2892	-0.41176	0.510567	0.790274	14.765	10.8272
ALS2CR12	155.627	128.905	147.843	140.62	94.4187	123.227	-0.168543	0.510886	0.790274	142.266	126.527
ALX3	167.598	186.573	157.213	186.227	212.442	158.263	0.0100038	0.965899	0.990968	177.086	178.536
ALX4	2.39426	1.69612	0	0	6.21175	0	-0.922062	0.593281	NA	2.04519	1.55294
ALYREF	317.24	744.596	666.332	680.297	637.326	654.797	0.37151	0.2285	0.573041	530.918	659.688
AMACR	0	3.39224	1.04114	0	0	0	-2.01612	0.367746	NA	1.69612	0.260286
AMBN	5.98565	0	1.04114	1.26685	0	3.62434	-0.827281	0.615493	NA	2.99283	1.48308
AMBRA1	519.555	561.415	593.452	689.165	865.919	785.273	0.435776	0.0472868	0.288039	540.485	733.452
AMD1	9888.3	5107.01	6026.14	6439.38	6836.66	5355.56	-0.257255	0.207906	0.551098	7497.66	6164.44
AMDHD1	52.6738	100.071	42.6869	39.2723	116.781	48.3245	-0.304651	0.549288	0.814008	76.3724	61.7662
AMDHD2	53.8709	100.071	79.127	70.9434	54.6634	57.9894	-0.274451	0.696507	0.888745	76.9709	65.6808
AMER1	216.681	188.269	237.381	209.03	175.171	210.212	0.0515594	0.789954	0.928678	202.475	207.948
AMFR	1193.54	965.091	1605.44	1306.12	1380.25	1330.13	0.38906	0.0332881	0.244661	1079.32	1405.49
AMH	1.19713	0	1.04114	0	1.24235	7.24868	1.94527	0.406169	NA	0.598565	2.38304
AMHR2	8.37992	16.9612	5.20572	8.86793	6.21175	14.4974	-0.487244	0.624118	NA	12.6705	8.69569
AMICA1	51057.6	71944.2	41635.4	76411.1	42459.8	42975	-0.290705	0.357815	0.686595	61500.9	50870.3
AMIGO1	93.3762	61.0603	124.937	24.0701	34.7858	39.8677	-0.635197	0.145725	0.470285	77.2182	55.9152
AMIGO2	739.827	417.245	583.041	891.86	1459.76	695.873	0.650914	0.116689	0.429556	578.536	907.634
AMIGO3	47.8852	54.2758	62.4687	57.0081	75.7834	45.9083	0.2446	0.625539	0.853951	51.0805	60.2921
AMMECR1	1139.67	983.749	1119.23	771.51	899.462	933.871	-0.189486	0.230731	0.575025	1061.71	931.018
AMMECR1L	1283.32	1580.78	1494.04	1610.16	1510.7	1389.33	0.0680619	0.59249	0.839133	1432.05	1501.06
AMN1	3314.86	2669.69	1503.41	2491.89	3200.3	2909.14	-0.303735	0.328668	0.664092	2992.27	2526.18
AMOT	94.5733	120.424	93.703	20.2696	32.3011	45.9083	-1.31545	6.46821e-05	0.00911783	107.499	48.0455
AMOTL1	70.6307	74.6292	69.7567	72.2103	109.327	96.649	0.257004	0.54972	0.814146	72.63	86.9857
AMPD1	13.1684	10.1767	1.04114	5.06739	3.72705	7.24868	-1.4407	0.219862	NA	11.6726	4.27107
AMPD2	5174	18855.7	11442.2	5823.7	5542.13	7961.46	-0.560911	0.301061	0.640441	12014.9	7692.37
AMPD3	3047.9	2679.87	2893.34	3652.32	4041.37	2265.21	0.120607	0.674888	0.877916	2863.88	3213.06
AMPH	629.691	1394.21	419.581	244.501	559.058	427.672	-1.26853	0.0616117	0.329371	1011.95	412.703
AMT	673.985	722.546	762.118	458.599	829.89	582.31	-0.0875586	0.708578	0.895091	698.266	658.229
AMY2B	4087.01	3619.52	3066.17	2600.84	3897.25	3263.11	-0.262694	0.216926	0.562434	3853.26	3206.84
AMZ1	3.59139	0	7.28801	3.80054	7.45411	2.41623	1.37455	0.194336	NA	1.7957	5.23972
AMZ2	2903.04	2578.1	2372.77	2175.18	2223.81	1969.22	-0.328981	0.0943669	0.392657	2740.57	2185.24
AMZ2P1	802.078	747.988	611.152	727.17	634.841	685	-0.244484	0.308586	0.648796	775.033	664.541
ANAPC1	1142.06	519.012	1137.97	713.235	862.192	1203.28	0.303621	0.11164	0.422144	830.538	979.169
ANAPC10	94.5733	88.1981	92.6619	100.081	63.3599	84.5679	-0.0963964	0.679629	0.879124	91.3857	85.1676
ANAPC11	125.699	142.474	173.871	177.359	187.595	154.638	0.370768	0.210319	0.553271	134.086	173.366
ANAPC13	1373.11	1801.28	1994.83	1994.02	1631.21	1413.49	0.160537	0.504092	0.786482	1587.19	1758.39
ANAPC15	169.993	274.771	169.707	212.83	152.809	158.263	-0.334375	0.110403	0.419863	222.382	173.402
ANAPC16	4381.5	3929.91	4112.52	3263.4	3133.21	3000.95	-0.296741	0.1181	0.431921	4155.7	3377.52
ANAPC1P1	11.9713	23.7457	24.9875	0	4.9694	18.1217	-0.920606	0.247949	0.593075	17.8585	12.0196
ANAPC2	289.706	306.997	281.109	363.585	329.223	273.033	0.0690807	0.858768	0.956306	298.352	311.738
ANAPC4	3887.08	2545.87	3355.61	3557.31	2830.08	3311.44	0.0345699	0.821632	0.94282	3216.48	3263.61
ANAPC5	4149.26	3336.26	4680.99	3767.6	3231.35	4444.65	0.11286	0.315852	0.654758	3742.76	4031.15
ANAPC7	1575.42	1328.06	1507.58	1454.34	1346.71	1487.19	0.000706393	0.995619	0.998737	1451.74	1448.95
ANG	104.15	27.1379	71.839	59.5418	91.934	67.6543	0.314819	0.489057	0.776361	65.6441	72.7423
ANGEL1	477.655	239.153	504.955	247.035	262.136	345.52	-0.0438736	0.82175	0.942839	358.404	339.912
ANGEL2	2361.94	1982.76	2149.96	2062.43	2124.42	2104.53	-0.0353258	0.743087	0.910378	2172.35	2110.34
ANGPT1	307.663	907.423	307.138	134.286	166.475	282.698	-1.61324	0.0160164	0.169594	607.543	222.649
ANGPT2	13.1684	13.5689	22.9052	10.1348	12.4235	15.7055	0.206746	0.686967	0.88359	13.3687	15.2922
ANGPT4	41.8996	25.4418	16.6583	11.4016	26.0894	14.4974	-0.962587	0.0440199	0.278361	33.6707	17.1617
ANGPTL1	81.4049	137.386	64.551	31.6712	142.87	61.6137	-0.549132	0.173311	0.510672	109.395	75.1766
ANGPTL2	4.78852	6.78447	1.04114	6.33424	12.4235	12.0811	0.332913	0.706644	NA	5.7865	7.97
ANGPTL3	5.98565	0	4.16458	0	2.4847	0	-0.994625	0.417591	NA	2.99283	1.66232
ANGPTL4	8.37992	3.39224	5.20572	16.469	12.4235	1.20811	0.446764	0.680911	NA	5.88608	8.82659
ANGPTL6	14.3656	11.8728	11.4526	11.4016	24.847	14.4974	0.198869	0.733881	0.906448	13.1192	15.5496
ANGPTL7	0	6.78447	2.08229	3.80054	8.69646	2.41623	0.604762	0.559704	NA	3.39224	4.24888
ANK1	201.118	259.506	291.52	314.178	116.781	339.48	0.18559	0.703272	0.892348	230.312	265.49
ANK2	0	3.39224	0	0	113.054	0	3.85357	0.0966354	NA	1.69612	28.2635
ANK3	247.806	184.877	414.375	95.0135	99.3881	137.725	-0.430766	0.269105	0.611948	216.341	186.625
ANKAR	205.907	164.523	150.966	106.415	115.539	111.146	-0.610723	0.00247542	0.0668807	185.215	121.017
ANKDD1A	1337.2	1767.36	881.849	1164.23	2094.6	2111.78	-0.011879	0.975235	0.992924	1552.28	1563.12
ANKDD1B	43.0967	47.4913	35.3989	30.4043	22.3623	49.5326	-0.391518	0.470228	0.765042	45.294	34.4245
ANKEF1	52.6738	32.2262	67.6744	22.8032	37.2705	48.3245	0.0590151	0.888397	0.965694	42.45	44.0182
ANKFY1	4133.69	4077.47	4181.24	6403.91	8274.06	5443.76	0.523517	0.0142557	0.160519	4105.58	6075.74
ANKH	1189.95	848.059	1162.96	912.13	1006.3	890.379	-0.010503	0.943939	0.984569	1019	992.943
ANKHD1	803.275	922.688	665.291	728.437	616.206	669.294	-0.363002	0.02105	0.194213	862.982	669.807
ANKHD1-EIF4EBP3	136.473	113.64	69.7567	84.8788	110.569	86.9841	-0.553563	0.0727144	0.352502	125.056	88.0472
ANKIB1	2115.33	1672.37	1972.97	2052.29	2441.22	2183.06	0.194154	0.140663	0.462968	1893.85	2162.38
ANKK1	7.18279	5.08835	15.6172	6.33424	19.8776	4.83245	0.981826	0.254218	NA	6.13557	11.6654
ANKLE1	94.5733	59.3641	66.6332	167.224	109.327	90.6084	0.403625	0.271881	0.61394	76.9687	108.448
ANKLE2	3281.34	3580.51	3701.27	3026.5	3232.6	3132.64	-0.0669573	0.565048	0.822819	3430.92	3273.25
ANKMY1	160.416	118.728	147.843	135.553	178.899	125.644	0.0927191	0.718747	0.900139	139.572	146.984
ANKMY2	658.422	466.433	618.44	571.348	545.392	514.656	0.013912	0.918049	0.975655	562.427	562.459
ANKRA2	1169.6	1782.62	1508.62	1342.86	1469.7	1325.3	-0.0483248	0.808897	0.936672	1476.11	1411.62
ANKRD1	2.39426	0	1.04114	0	11.1812	1.20811	1.70305	0.617839	NA	1.19713	3.3576
ANKRD10	5493.63	6116.2	4764.28	6211.35	5216.63	4716.47	-0.157814	0.423204	0.733909	5804.92	5227.18
ANKRD11	3444.15	5146.02	3124.47	2977.09	3681.09	3667.83	-0.343759	0.0520091	0.301981	4295.08	3362.62
ANKRD12	10407.9	12517.4	7795.05	9868.74	10223.3	8667	-0.334027	0.0330841	0.24397	11462.6	9138.52
ANKRD13A	19770.6	30906.7	21166.5	23408.8	26520.5	19149.8	-0.144599	0.368874	0.694785	25338.6	22561.4
ANKRD13B	14.3656	30.5301	27.0698	5.06739	7.45411	14.4974	-0.760801	0.250675	0.594915	22.4478	13.5221
ANKRD13C	683.562	471.521	631.975	561.213	611.237	564.189	0.0584017	0.734255	0.906448	577.541	592.153
ANKRD13D	2722.28	4438.74	3319.17	4304.75	4662.54	2870.48	0.088055	0.809314	0.93678	3580.51	3789.23
ANKRD16	43.0967	23.7457	45.8104	25.3369	43.4823	45.9083	0.315872	0.455795	0.756049	33.4212	40.1345
ANKRD17	4357.56	4489.62	3573.21	4787.42	5296.14	4631.9	0.0315377	0.814745	0.939856	4423.59	4572.17
ANKRD18A	56.2652	128.905	165.542	74.744	103.115	32.619	0.0532924	0.936003	0.982146	92.5851	94.005
ANKRD18DP	26.3369	20.3534	30.1932	24.0701	23.6047	21.746	0.11765	0.893323	0.967599	23.3451	24.9035
ANKRD19P	93.3762	101.767	123.896	65.876	69.5717	111.146	-0.108144	0.757328	0.91472	97.5717	92.6226
ANKRD2	16.7598	44.0991	21.864	25.3369	39.7552	28.9947	0.0177793	0.973673	0.992451	30.4295	28.9877
ANKRD20A11P	5.98565	3.39224	12.4937	1.26685	1.24235	3.62434	-0.313518	0.750442	NA	4.68895	4.65682
ANKRD20A12P	4.78852	3.39224	0	0	7.45411	1.20811	-0.7838	0.599914	NA	4.09038	2.16555
ANKRD20A4	39.5053	0	108.279	0	1.24235	8.45679	0.124667	0.951586	0.987046	19.7527	29.4945
ANKRD20A5P	52.6738	72.9331	66.6332	30.4043	32.3011	50.7407	-0.498114	0.202341	0.546032	62.8034	45.0199
ANKRD20A8P	2.39426	8.48059	2.08229	0	1.24235	0	-2.71452	0.117743	NA	5.43743	0.83116
ANKRD20A9P	1.19713	3.39224	1.04114	1.26685	22.3623	0	1.14038	0.418507	NA	2.29468	6.16758
ANKRD22	913.411	1458.66	649.674	3563.64	4677.45	1870.16	0.765426	0.0667992	0.339841	1186.04	2690.23
ANKRD23	73.025	66.1486	84.3327	57.0081	74.5411	74.903	0.0700171	0.778329	0.92256	69.5868	72.6962
ANKRD24	32.3225	1.69612	20.8229	10.1348	39.7552	13.2892	0.584607	0.423222	0.733909	17.0093	21.0005
ANKRD26	344.774	342.616	346.701	291.375	508.122	425.256	0.197024	0.396328	0.715123	343.695	392.863
ANKRD26P1	16.7598	5.08835	3.12343	2.53369	3.72705	1.20811	-1.88495	0.10546	NA	10.9241	2.64807
ANKRD27	957.705	1253.43	1074.46	1238.98	1119.36	1005.15	0.00835948	0.966098	0.991018	1105.57	1109.49
ANKRD28	2525.95	3670.4	3306.67	1511.35	1688.35	2550.33	-0.478841	0.0870052	0.379917	3098.17	2264.18
ANKRD29	1.19713	6.78447	3.12343	6.33424	2.4847	2.41623	-0.076116	0.948963	NA	3.9908	3.58965
ANKRD30B	0	0	1.04114	0	0	0	0.437507	0.871623	NA	0	0.260286
ANKRD30BL	1.19713	0	0	0	0	0	-1.60055	0.608101	NA	0.598565	0
ANKRD31	17.957	5.08835	17.6995	2.53369	11.1812	4.83245	-0.312381	0.678124	0.878568	11.5227	9.06169
ANKRD32	1193.54	1730.04	927.66	994.475	1205.08	1289.06	-0.391873	0.111858	0.422217	1461.79	1104.07
ANKRD33B	926.579	1131.31	671.538	1131.29	1894.59	1355.5	0.210127	0.585422	0.835601	1028.95	1263.23
ANKRD34A	122.107	103.463	84.3327	39.2723	140.386	73.6949	-0.422299	0.3267	0.661905	112.785	84.4214
ANKRD34B	177.175	291.732	298.808	220.431	603.783	439.753	0.804805	0.493987	0.779754	234.454	390.694
ANKRD35	10.7742	1.69612	8.32916	10.1348	13.6659	4.83245	0.699362	0.47369	NA	6.23515	9.24056
ANKRD36	650.042	561.415	760.035	352.183	489.486	569.021	-0.183753	0.353766	0.683178	605.729	542.682
ANKRD36B	223.863	149.258	483.091	149.488	192.564	231.958	0.426754	0.21553	0.560762	186.561	264.275
ANKRD36BP1	933.762	876.893	1058.84	1688.71	1631.21	1225.03	0.586495	0.0289067	0.228719	905.328	1400.95
ANKRD36BP2	292.1	67.8447	155.131	44.3396	73.2987	426.464	-0.00992235	0.988553	0.996399	179.972	174.808
ANKRD36C	173.584	98.3749	199.9	108.949	180.141	149.806	0.234927	0.356137	0.685393	135.979	159.699
ANKRD37	8.37992	10.1767	18.7406	20.2696	23.6047	7.24868	0.943552	0.123026	0.440616	9.27831	17.4659
ANKRD39	25.1397	22.0495	44.7692	20.2696	31.0588	26.5785	0.376215	0.404634	0.721022	23.5946	30.669
ANKRD40	863.131	549.542	968.264	852.588	744.168	763.527	0.256775	0.049884	0.295663	706.337	832.137
ANKRD42	596.171	873.501	686.114	537.143	464.639	411.966	-0.477624	0.157747	0.489624	734.836	524.966
ANKRD44	19395.9	21252.4	14166.9	18153.9	17161.8	16488.3	-0.312315	0.0121083	0.149354	20324.1	16492.7
ANKRD44-IT1	536.315	374.842	381.059	452.264	362.766	276.658	-0.346231	0.229203	0.573804	455.578	368.187
ANKRD45	25.1397	11.8728	6.24687	21.5364	7.45411	51.9488	-0.0224737	0.984658	0.99545	18.5063	21.7966
ANKRD46	210.695	128.905	163.46	98.8141	108.085	100.273	-0.500116	0.0630858	0.331598	169.8	117.658
ANKRD49	1788.51	2250.75	2118.73	1784.99	2197.72	2071.91	0.024997	0.835448	0.947815	2019.63	2043.34
ANKRD50	885.877	581.769	588.247	941.267	1246.08	843.263	0.25229	0.312315	0.651786	733.823	904.714
ANKRD52	2561.86	2159.16	2789.23	2662.91	2587.82	2520.12	0.168105	0.21291	0.556757	2360.51	2640.02
ANKRD53	5.98565	3.39224	6.24687	12.6685	12.4235	12.0811	1.09755	0.142931	NA	4.68895	10.855
ANKRD54	199.921	189.965	366.483	181.159	175.171	166.72	0.149828	0.595103	0.841035	194.943	222.383
ANKRD55	404.63	637.74	429.993	302.776	711.867	553.316	-0.0469626	0.904763	0.97229	521.185	499.488
ANKRD6	463.29	693.712	355.03	480.135	515.576	582.31	-0.260724	0.391207	0.71069	578.501	483.263
ANKRD61	102.953	94.9826	82.2504	87.4124	105.6	137.725	0.0632619	0.828099	0.945245	98.9679	103.247
ANKRD62	9.57705	6.78447	4.16458	6.33424	6.21175	1.20811	-0.973457	0.301348	NA	8.18076	4.47967
ANKRD62P1-PARP4P3	7.18279	8.48059	16.6583	2.53369	3.72705	12.0811	-0.015472	0.985535	NA	7.83169	8.75005
ANKRD7	1.19713	1.69612	1.04114	0	4.9694	3.62434	0.75478	0.709408	NA	1.44662	2.40872
ANKRD9	40.7025	59.3641	65.5921	45.6065	31.0588	78.5273	0.139332	0.739697	0.909151	50.0333	55.1962
ANKS1A	1365.93	3148	1225.43	1328.92	1607.6	1409.87	-0.649589	0.0155521	0.16737	2256.96	1392.95
ANKS1B	4.78852	0	2.08229	1.26685	1.24235	0	-1.03417	0.496671	NA	2.39426	1.14787
ANKS3	71.8279	54.2758	80.1681	48.1402	55.9058	38.6596	-0.171113	0.584869	0.83508	63.0518	55.7184
ANKS6	177.175	135.689	265.492	74.744	125.477	101.481	-0.230459	0.368126	0.694689	156.432	141.799
ANKUB1	38.3082	59.3641	61.4275	10.1348	7.45411	32.619	-1.39258	0.0672635	0.340876	48.8362	27.9089
ANKZF1	5541.52	4046.94	3102.61	2619.84	3197.81	3103.64	-0.656123	0.00620798	0.106502	4794.23	3005.98
ANLN	102.953	130.601	274.862	112.749	206.23	263.369	0.961697	0.116116	0.429032	116.777	214.303
ANO10	1231.85	1636.75	1005.75	1161.7	1200.11	823.933	-0.439382	0.137693	0.459845	1434.3	1047.87
ANO2	29.9283	10.1767	24.9875	21.5364	8.69646	30.2028	0.0879538	0.931521	0.980264	20.0525	21.3558
ANO5	38.3082	20.3534	31.2343	78.5445	113.054	28.9947	0.964764	0.0570063	0.314766	29.3308	62.9569
ANO6	4497.62	3504.18	5286.93	4304.75	3375.47	4465.18	0.127334	0.568485	0.824769	4000.9	4358.08
ANO7	3.59139	23.7457	21.864	10.1348	29.8164	1.20811	0.359854	0.707637	NA	13.6685	15.7558
ANO8	113.727	84.8059	178.036	121.617	135.416	146.182	0.568445	0.0773264	0.362198	99.2667	145.313
ANO9	259.777	281.556	473.721	211.563	166.475	146.182	-0.233006	0.563946	0.821981	270.667	249.485
ANOS1	96.9676	74.6292	26.0286	26.6038	103.115	32.619	-1.1418	0.116612	0.429556	85.7984	47.0916
ANP32A	41411.2	64817.2	36682.6	36666.4	37244.4	33759.5	-0.512853	0.0251664	0.213101	53114.2	36088.2
ANP32A-IT1	1084.6	1438.31	474.762	818.383	1002.58	674.127	-0.8319	0.000188567	0.0175476	1261.45	742.462
ANP32AP1	11.9713	28.834	11.4526	10.1348	6.21175	8.45679	-1.10278	0.113552	NA	20.4027	9.06398
ANP32B	4069.05	3616.12	5381.68	4357.95	3134.45	4548.54	0.178372	0.341464	0.675425	3842.59	4355.66
ANP32C	1.19713	16.9612	14.576	8.86793	4.9694	2.41623	0.119528	0.909447	NA	9.07916	7.70739
ANP32E	3724.27	2583.19	3627.35	3825.88	3488.52	3770.52	0.220351	0.274441	0.616549	3153.73	3678.07
ANPEP	10428.2	35632.1	15493.3	21316	18178.1	14912.9	-0.134963	0.771206	0.919662	23030.1	17475.1
ANTXR1	8.37992	5.08835	2.08229	12.6685	6.21175	10.873	0.126559	0.919378	NA	6.73414	7.95888
ANTXR2	5995.23	6870.97	5977.21	6930.92	8656.7	5826.73	0.0760161	0.741033	0.909672	6433.1	6847.89
ANTXRL	5.98565	13.5689	37.4812	15.2022	19.8776	3.62434	1.05923	0.391709	NA	9.7773	19.0463
ANTXRLP1	20.3512	11.8728	39.5635	6.33424	2.4847	8.45679	-0.439687	0.412868	0.7268	16.112	14.2098
ANXA1	27893.2	49080.6	42068.5	44931.3	48564.7	28898.1	0.128033	0.653251	0.866863	38486.9	41115.6
ANXA10	11.9713	11.8728	12.4937	16.469	26.0894	25.3704	0.673393	0.461072	NA	11.9221	20.1056
ANXA11	15489.7	25105.9	16220	16727.4	17621.5	12688.8	-0.326098	0.158273	0.490342	20297.8	15814.4
ANXA2	14298.5	9097.98	10936.2	17027.7	14736.8	14046.7	0.249271	0.327995	0.663181	11698.3	14186.8
ANXA2P2	10.7742	20.3534	14.576	25.3369	4.9694	16.9136	-0.0318188	0.957165	0.988221	15.5638	15.449
ANXA2R	355.548	200.142	418.54	496.604	591.359	380.555	0.783601	0.0088155	0.126918	277.845	471.765
ANXA3	7344.4	25012.7	7908.53	25931.1	26163.9	14220.7	0.270082	0.496119	0.781798	16178.5	18556.1
ANXA4	1194.74	1300.92	1620.02	2091.56	2084.66	1309.59	0.487574	0.0127363	0.15277	1247.83	1776.46
ANXA5	7163.63	6287.51	6181.27	13523.6	7670.27	10029.8	0.40009	0.121959	0.439489	6725.57	9351.22
ANXA6	6773.37	4735.56	8570.7	5710.95	6061.43	7043.3	0.265232	0.189604	0.532708	5754.46	6846.59
ANXA7	4600.57	5851.61	3945.94	5918.71	4406.62	4314.17	-0.18029	0.1195	0.434521	5226.09	4646.36
ANXA8	4.78852	1.69612	6.24687	0	17.3929	0	1.12864	0.524367	NA	3.24232	5.90994
ANXA8L1	3.59139	6.78447	30.1932	2.53369	18.6353	0	1.10022	0.370488	NA	5.18793	12.8405
ANXA9	3803.28	3970.61	2722.59	2654.04	2644.97	1768.68	-0.66883	0.0501427	0.296725	3886.95	2447.57
AOAH	13127.7	12793.8	7052.71	13201.8	10486.7	13342.4	-0.277913	0.207361	0.550629	12960.8	11020.9
AOAH-IT1	235.835	267.987	61.4275	140.62	221.138	295.988	-0.603573	0.26577	0.609249	251.911	179.793
AOC1	19.1541	259.506	2.08229	64.6092	154.052	88.1922	-0.758188	0.481569	0.771895	139.33	77.2338
AOC2	1203.12	1450.18	1024.49	893.127	788.893	845.679	-0.56976	0.137343	0.459821	1326.65	888.046
AOC3	853.554	858.236	884.973	770.243	688.262	613.721	-0.209857	0.634487	0.85843	855.895	739.3
AOC4P	76.6164	69.5408	38.5223	43.0728	27.3317	33.8272	-1.06521	0.011808	0.147275	73.0786	35.6885
AOX1	13.1684	6.78447	6.24687	8.86793	24.847	4.83245	0.0895186	0.923647	NA	9.97646	11.1986
AOX2P	3.59139	0	0	6.33424	1.24235	7.24868	0.748627	0.740323	NA	1.7957	3.70632
AP1AR	530.329	391.803	443.528	535.876	437.308	457.875	0.0305306	0.888072	0.965605	461.066	468.647
AP1B1	1218.68	961.699	1153.59	1781.19	1784.02	1513.77	0.505095	0.0708775	0.348029	1090.19	1558.14
AP1G1	10066.7	13972.6	8838.27	9975.15	10519	10053.9	-0.276511	0.00934517	0.130276	12019.6	9846.58
AP1G2	3436.96	2656.12	3617.98	3481.3	3643.82	3663	0.254328	0.178439	0.518332	3046.54	3601.52
AP1M1	833.203	1338.24	1010.95	1379.6	1211.29	909.709	0.0616165	0.810827	0.93781	1085.72	1127.89
AP1M2	141.261	83.1098	179.077	67.1429	126.72	50.7407	-0.0550489	0.9405	0.983441	112.186	105.92
AP1S1	203.512	111.944	305.055	277.44	245.985	253.704	0.799932	0.00251305	0.0671734	157.728	270.546
AP1S2	5361.95	3848.49	3182.78	6811.84	3423.92	4494.18	-0.0884687	0.692175	0.886483	4605.22	4478.18
AP1S3	237.032	94.9826	138.472	190.027	428.611	228.333	0.489707	0.285447	0.628344	166.007	246.361
AP2A1	1161.22	1706.29	1427.41	1363.13	1369.07	1110.26	-0.114168	0.662408	0.872064	1433.76	1317.47
AP2A2	685.956	712.37	842.286	761.375	787.65	695.873	0.142087	0.387793	0.708749	699.163	771.796
AP2B1	5584.62	6769.21	6829.91	5975.72	5719.78	6462.19	0.0160891	0.890379	0.966552	6176.91	6246.9
AP2M1	6448.94	8132.89	7050.63	7812.65	6246.54	6173.46	-0.095063	0.544908	0.80999	7290.92	6820.82
AP2S1	764.967	708.977	694.443	997.009	690.747	868.633	0.120495	0.552792	0.815972	736.972	812.708
AP3B1	3345.98	3694.15	2485.21	3806.88	4289.84	3945.7	0.0107143	0.93878	0.983196	3520.06	3631.91
AP3B2	120.91	1526.51	12.4937	556.146	124.235	18.1217	-2.52944	0.0183598	0.180633	823.708	177.749
AP3D1	1480.85	1629.97	1561.72	1828.06	1931.86	1716.73	0.17036	0.225774	0.570572	1555.41	1759.59
AP3M1	2554.68	2184.6	1908.42	2033.29	2335.62	2110.57	-0.18111	0.198517	0.541482	2369.64	2096.97
AP3M2	827.217	863.324	1222.3	557.413	484.517	593.183	-0.299714	0.339498	0.674303	845.271	714.354
AP3S1	3381.89	4469.27	2992.25	4243.94	3489.76	3318.69	-0.166354	0.270574	0.613212	3925.58	3511.16
AP3S2	7.18279	6.78447	3.12343	5.06739	6.21175	2.41623	-0.766213	0.320609	NA	6.98363	4.2047
AP4B1	1422.19	1166.93	1326.42	1010.94	832.375	974.947	-0.320678	0.0831434	0.372736	1294.56	1036.17
AP4B1-AS1	142.459	173.004	129.102	100.081	94.4187	141.349	-0.436118	0.15343	0.482542	157.731	116.238
AP4E1	1033.12	902.335	1201.48	927.332	1483.37	1553.63	0.428196	0.0817171	0.369251	967.729	1291.45
AP4M1	81.4049	110.248	99.9499	135.553	106.842	91.8166	0.174832	0.55887	0.819323	95.8263	108.54
AP4S1	317.24	313.782	272.78	249.569	241.016	286.323	-0.257907	0.103187	0.407473	315.511	262.422
AP5B1	17544	25775.9	13888.9	28250.7	42044.9	27222.4	0.261595	0.252781	0.597351	21659.9	27851.7
AP5M1	1715.49	1611.31	1488.84	2002.89	1997.7	2125.07	0.179304	0.141833	0.465056	1663.4	1903.62
AP5S1	63.4479	83.1098	88.4973	102.615	119.266	123.227	0.571864	0.0559063	0.311582	73.2789	108.401
AP5Z1	432.164	590.249	543.477	601.752	559.058	504.991	0.121019	0.735328	0.907064	511.207	552.32
APAF1	15034.8	21937.6	12088.7	12240.3	19085	13956.1	-0.358956	0.219626	0.564635	18486.2	14342.5
APBA1	8.37992	1.69612	11.4526	12.6685	16.1506	3.62434	1.18843	0.127624	0.4456	5.03802	10.974
APBA2	148.444	383.323	596.576	54.4744	47.2093	158.263	-1.27217	0.0302521	0.233541	265.883	214.131
APBA3	44.2938	57.668	86.415	141.887	110.569	74.903	1.00811	0.0849137	0.377052	50.9809	103.444
APBB1	264.566	198.446	546.601	154.555	146.597	141.349	-0.086883	0.798019	0.932029	231.506	247.276
APBB1IP	16249.9	25521.5	11718.1	26820.4	27293.2	20577.8	-0.0222273	0.902674	0.971794	20885.7	21602.4
APBB2	287.311	617.387	88.4973	390.189	314.315	211.42	-0.989729	0.0378808	0.262044	452.349	251.105
APBB3	2363.14	3622.91	1931.32	2654.04	2056.09	2280.92	-0.409474	0.0750865	0.35742	2993.02	2230.59
APC	4740.64	7038.89	3802.26	5064.85	6293.75	6347.42	-0.132536	0.458059	0.75787	5889.76	5377.07
APC2	26.3369	32.2262	58.3041	43.0728	77.0258	38.6596	0.89907	0.108878	0.416568	29.2816	54.2656
APCDD1	14.3656	20.3534	24.9875	11.4016	27.3317	30.2028	0.446954	0.531175	0.802055	17.3595	23.4809
APCDD1L	5.98565	1.69612	5.20572	1.26685	7.45411	2.41623	0.181036	0.879885	NA	3.84089	4.08572
APCDD1L-AS1	8.37992	5.08835	10.4114	8.86793	2.4847	4.83245	-0.0796942	0.933172	NA	6.73414	6.64913
APEH	1313.25	1248.34	1430.53	1393.53	1387.71	1385.71	0.128497	0.482098	0.772023	1280.8	1399.37
APEX1	1741.83	1109.26	1716.85	1505.01	1320.62	1493.23	0.107904	0.423766	0.73408	1425.54	1508.93
APEX2	252.595	228.976	367.524	283.774	316.799	326.19	0.431578	0.0420091	0.273627	240.785	323.572
APH1A	3475.27	4494.71	4082.33	5602	5255.14	5061.99	0.319845	0.000657329	0.0322231	3984.99	5000.37
APH1B	1806.47	3210.75	1585.66	1807.79	1843.65	1736.06	-0.505765	0.171364	0.508444	2508.61	1743.29
API5	1965.69	1265.3	2107.28	2147.31	1744.26	2260.38	0.377512	0.00592612	0.103686	1615.5	2064.81
APIP	547.089	325.655	497.667	501.671	454.7	343.104	0.0652847	0.765669	0.917005	436.372	449.286
APITD1	3.59139	8.48059	9.3703	1.26685	2.4847	4.83245	-0.471332	0.652813	NA	6.03599	4.48857
APLF	155.627	81.4137	121.814	76.0108	168.96	122.019	0.091518	0.799306	0.932699	118.52	122.201
APLN	0	3.39224	0	0	6.21175	3.62434	0.69394	0.664528	NA	1.69612	2.45902
APLP1	17.957	6.78447	12.4937	11.4016	31.0588	7.24868	0.338087	0.673295	NA	12.3707	15.5507
APLP2	33878.8	35398	25451.8	40525.2	38695.5	32860.7	-0.0528524	0.713294	0.897142	34638.4	34383.3
APMAP	9629.72	27763.8	10957	10395.7	11032.1	10198.9	-0.65954	0.090418	0.385127	18696.7	10645.9
APOA1-AS	23.9426	16.9612	16.6583	34.2049	33.5435	25.3704	0.331112	0.412448	0.726746	20.4519	27.4443
APOA1BP	275.34	181.485	327.96	249.569	196.291	297.196	0.235938	0.265273	0.608823	228.412	267.754
APOA2	386.673	413.853	84.3327	523.208	324.254	381.764	-0.630189	0.337864	0.67316	400.263	328.389
APOBEC2	69.4336	44.0991	86.415	82.3451	69.5717	49.5326	0.337739	0.294133	0.63467	56.7663	71.9661
APOBEC3A	1953.72	5519.17	3099.49	7968.47	6522.34	5350.73	0.705848	0.0163255	0.170588	3736.44	5735.26
APOBEC3B	65.8422	42.403	211.352	96.2804	325.496	526.737	2.36934	0.0113714	0.145058	54.1226	289.966
APOBEC3B-AS1	15.5627	13.5689	5.20572	6.33424	6.21175	8.45679	-1.14756	0.149839	NA	14.5658	6.55213
APOBEC3C	744.615	373.146	954.729	1007.14	1033.64	1308.39	0.990332	0.000424391	0.0259694	558.881	1075.97
APOBEC3D	436.953	239.153	492.461	354.717	608.752	480.829	0.599091	0.0382807	0.263072	338.053	484.19
APOBEC3F	617.72	281.556	691.32	775.31	1012.52	791.314	0.970635	0.00961418	0.132157	449.638	817.615
APOBEC3G	1327.62	1287.35	1921.95	2096.63	1995.22	2120.24	0.636562	0.000323318	0.022297	1307.49	2033.51
APOBEC3H	219.075	189.965	352.948	92.4798	124.235	102.69	-0.405182	0.278785	0.622289	204.52	168.088
APOBEC4	1.19713	3.39224	3.12343	2.53369	3.72705	2.41623	0.450409	0.71814	NA	2.29468	2.9501
APOBR	28910.7	54937.3	23367.4	49042.2	53811.2	34352.7	-0.0864895	0.758169	0.914848	41924	40143.4
APOC1	1.19713	0	0	0	36.0282	0	0.767209	0.895756	NA	0.598565	9.00704
APOD	1.19713	1.69612	0	0	2.4847	0	-1.11484	0.669516	NA	1.44662	0.621175
APOE	14.3656	10.1767	10.4114	10.1348	77.0258	4.83245	0.731764	0.423347	0.733909	12.2711	25.6011
APOF	4.78852	6.78447	3.12343	11.4016	7.45411	4.83245	0.156155	0.875453	NA	5.7865	6.7029
APOL1	2008.79	2857.96	3949.06	10356.5	16640	5830.35	1.75856	0.00019955	0.0175476	2433.37	9193.98
APOL2	5901.86	7649.49	9095.44	21679.6	20401.9	13132.2	1.15403	0.000233796	0.0186445	6775.67	16077.3
APOL3	1405.43	581.769	1890.72	4134.99	2170.39	1958.35	1.38518	4.24804e-05	0.00705269	993.6	2538.61
APOL4	44.2938	30.5301	64.551	238.167	96.9034	15.7055	1.27644	0.073445	0.353771	37.412	103.832
APOL5	0	0	0	1.26685	9.93881	8.45679	4.12261	0.101239	NA	0	4.91561
APOL6	9951.75	11364	16667.7	62796.3	88111.3	49593	2.19454	2.72084e-05	0.00544132	10657.9	54292.1
APOLD1	193.935	96.6787	142.637	76.0108	62.1175	164.303	-0.360519	0.373707	0.697991	145.307	111.267
APOM	257.383	415.549	246.751	339.515	309.345	271.825	-0.181767	0.350239	0.680274	336.466	291.859
APOO	117.319	113.64	117.649	146.954	130.447	129.268	0.172278	0.55733	0.818682	115.479	131.08
APOOL	464.487	293.428	320.672	372.453	318.042	403.51	-0.0761527	0.686014	0.882972	378.958	353.669
APOPT1	177.175	208.623	237.381	302.776	196.291	205.379	0.288777	0.116183	0.429055	192.899	235.457
APP	4482.06	4638.88	5958.47	6681.35	5770.72	4954.47	0.350738	0.043995	0.278361	4560.47	5841.25
APPBP2	3136.48	2571.32	2862.11	3053.1	3213.96	3143.51	0.110615	0.433918	0.741152	2853.9	3068.17
APPL1	1868.72	1043.11	1424.29	1408.73	1989	1477.52	0.141048	0.533472	0.803883	1455.92	1574.89
APPL2	5924.6	7895.43	4404.04	4642.99	4907.29	4814.33	-0.548402	0.000930847	0.0397392	6910.02	4692.16
APRT	166.401	173.004	321.714	267.305	213.684	215.044	0.564555	0.137732	0.459845	169.703	254.437
APTR	568.637	619.083	378.977	357.251	448.489	337.063	-0.648498	0.0237193	0.205935	593.86	380.445
APTX	588.988	520.708	608.028	699.3	501.91	645.132	0.140271	0.334842	0.67019	554.848	613.592
AQP1	73.025	40.7068	21.864	12.6685	14.9082	35.0353	-1.49137	0.00769751	0.12031	56.8659	21.119
AQP10	403.433	410.461	386.265	491.537	154.052	492.91	-0.0798237	0.920402	0.976057	406.947	381.191
AQP11	116.122	37.3146	63.5098	51.9407	68.3293	64.03	-0.221123	0.490738	0.777008	76.7182	61.9525
AQP3	664.408	101.767	461.227	241.968	176.414	1611.62	1.06115	0.128457	0.446683	383.087	622.808
AQP7	3.59139	1.69612	2.08229	2.53369	0	1.20811	-0.881346	0.526632	NA	2.64376	1.45602
AQP7P1	43.0967	118.728	7.28801	3.80054	3.72705	8.45679	-3.81425	1.43229e-05	0.00384656	80.9125	5.8181
AQP7P3	5.98565	16.9612	5.20572	0	2.4847	0	-2.60416	0.150081	NA	11.4734	1.92261
AQP8	1.19713	5.08835	4.16458	10.1348	2.4847	1.20811	0.687237	0.615717	NA	3.14274	4.49804
AQP9	101161	196209	66007.5	117072	159795	132245	-0.325592	0.316051	0.654831	148685	118780
AQR	2005.19	1706.29	1816.8	2339.87	2075.97	2158.9	0.170996	0.17817	0.518157	1855.74	2097.88
AR	4.78852	8.48059	3.12343	35.4717	9.93881	1.20811	0.405166	0.639588	NA	6.63456	12.4355
ARAF	2444.54	5056.13	3160.91	3798.01	3138.18	2973.17	-0.142217	0.53081	0.801813	3750.33	3267.57
ARAP1	10694	19390	12230.3	16742.7	17935.8	12523.3	0.00465543	0.985738	0.995668	15042	14858
ARAP2	5655.25	4794.93	4666.41	6520.46	8802.06	6260.44	0.30777	0.150212	0.476939	5225.09	6562.34
ARAP3	9398.67	11915.2	4980.83	7229.9	9959.93	6386.08	-0.629305	0.0392095	0.265141	10657	7139.19
ARCN1	3996.02	3285.38	3309.8	4606.26	4817.84	4463.98	0.218446	0.22565	0.570572	3640.7	4299.47
AREG	47.8852	208.623	32.2755	57.0081	96.9034	146.182	-0.382225	0.622105	0.853182	128.254	83.0921
AREL1	5196.75	8312.68	3628.39	4755.74	6198.09	4619.82	-0.490955	0.00926501	0.12996	6754.71	4800.51
ARF1	11464.9	18489.4	12000.2	14695.4	13539.1	12000.2	-0.176736	0.270774	0.613296	14977.2	13058.7
ARF3	11643.3	14026.9	9692.01	12664.7	11681.8	11083.2	-0.198134	0.0862029	0.379491	12835.1	11280.4
ARF4	8190.77	9932.47	5799.17	7247.63	5853.96	6707.44	-0.502614	0.0111531	0.144536	9061.62	6402.05
ARF5	2328.42	2735.84	2326.96	2702.18	2206.42	1873.78	-0.155511	0.455209	0.755796	2532.13	2277.34
ARF6	6510	6835.36	6956.93	7499.73	6172	5493.29	-0.0351918	0.805579	0.935709	6672.68	6530.49
ARFGAP1	770.952	1187.28	822.504	965.337	915.613	855.344	-0.138676	0.580667	0.832901	979.118	889.699
ARFGAP2	2719.88	3163.26	3584.66	3476.23	3074.82	3220.83	0.181241	0.300179	0.639224	2941.57	3339.13
ARFGAP3	4404.24	6855.71	2950.6	4627.79	3437.59	4119.66	-0.558749	0.000727168	0.034603	5629.98	3783.91
ARFGEF1	5299.7	6089.06	4590.41	5210.54	6123.55	4946.01	-0.136256	0.499447	0.783854	5694.38	5217.63
ARFGEF2	2203.92	1304.31	2142.68	2108.03	1977.82	2401.73	0.330632	0.0430227	0.276136	1754.12	2157.56
ARFGEF3	11.9713	10.1767	15.6172	12.6685	14.9082	10.873	0.296751	0.730605	0.904747	11.074	13.5167
ARFIP1	5534.34	4355.63	2882.93	4670.87	4816.59	6287.02	-0.132343	0.715047	0.897751	4944.98	4664.35
ARFIP2	982.845	759.861	895.384	844.987	827.406	879.506	-0.0137443	0.903492	0.972023	871.353	861.821
ARFRP1	232.243	267.987	270.698	316.712	250.955	254.912	0.125051	0.523374	0.797578	250.115	273.319
ARG1	10898.7	44224.6	9842.98	6490.06	17349.4	6012.78	-1.10897	0.122913	0.440529	27561.6	9923.81
ARG2	392.659	401.98	400.841	433.262	300.649	455.458	-0.00164894	0.99418	0.998363	397.319	397.552
ARGFX	2.39426	5.08835	1.04114	2.53369	2.4847	1.20811	-0.939274	0.573444	NA	3.74131	1.81691
ARGFXP2	341.182	330.743	170.748	391.456	344.131	438.545	-0.0748899	0.793234	0.930411	335.963	336.22
ARGLU1	12171.2	13277.2	10690.5	11273.7	11996.1	10604.8	-0.193171	0.0612481	0.328461	12724.2	11141.3
ARHGAP1	3130.5	4672.81	3644.01	4240.14	3761.84	3605.01	-0.0311525	0.882326	0.964356	3901.65	3812.75
ARHGAP10	203.512	120.424	195.735	133.019	111.812	157.055	-0.103557	0.753542	0.913544	161.968	149.405
ARHGAP11A	363.928	193.357	421.663	349.65	460.912	816.684	0.89196	0.0115622	0.145915	278.643	512.227
ARHGAP11B	45.491	35.6185	49.9749	69.6766	69.5717	76.1111	0.681497	0.0376254	0.261456	40.5547	66.3336
ARHGAP12	1954.91	1602.83	1558.59	1102.16	1311.92	1334.96	-0.421793	0.0246264	0.210958	1778.87	1326.91
ARHGAP15	5741.44	11978	4336.37	5524.72	5212.9	4807.08	-0.766165	0.000206691	0.0175476	8859.71	4970.27
ARHGAP17	1276.14	1188.98	1451.36	2115.63	2195.23	1379.66	0.512473	0.00368578	0.0819538	1232.56	1785.47
ARHGAP18	1409.02	1458.66	1169.21	1150.3	954.126	1566.92	-0.245836	0.363765	0.691436	1433.84	1210.14
ARHGAP19	5144.07	5783.76	4196.85	2585.63	4599.18	3984.36	-0.505244	0.110774	0.42063	5463.92	3841.51
ARHGAP20	16.7598	5.08835	9.3703	13.9353	4.9694	4.83245	-0.304351	0.747256	0.912438	10.9241	8.27687
ARHGAP21	1878.3	2062.48	2855.86	1934.48	1033.64	2103.32	-0.0407814	0.882416	0.964384	1970.39	1981.82
ARHGAP22	27.534	10.1767	9.3703	17.7359	11.1812	6.04056	-0.721375	0.368922	0.694785	18.8554	11.082
ARHGAP23	10.7742	8.48059	5.20572	26.6038	63.3599	28.9947	1.47248	0.0622852	0.330315	9.62738	31.041
ARHGAP24	1728.66	1416.26	932.865	1333.99	2412.65	1626.12	-0.092849	0.839664	0.948821	1572.46	1576.41
ARHGAP25	23277	26430.6	20885.4	23379.7	24191.1	20914.8	-0.15963	0.43603	0.74248	24853.8	22342.7
ARHGAP26	24846.5	46746.7	23673.5	28473.7	34219.3	28029.4	-0.280598	0.138787	0.461614	35796.6	28599
ARHGAP26-AS1	9.57705	23.7457	18.7406	13.9353	27.3317	12.0811	0.230898	0.741683	0.909946	16.6614	18.0222
ARHGAP26-IT1	99.3619	174.7	55.1807	46.8733	85.7222	103.898	-0.868491	0.0272719	0.223041	137.031	72.9185
ARHGAP27	10638.9	14449.2	9292.21	14706.8	15379.1	11380.4	-0.010105	0.963642	0.990092	12544.1	12689.6
ARHGAP29	481.247	237.457	178.036	169.758	222.381	450.626	-0.440518	0.447219	0.751422	359.352	255.2
ARHGAP30	40374.4	63867.3	39253.2	49326	55479.7	39151.3	-0.176494	0.262194	0.606059	52120.9	45802.5
ARHGAP31	758.981	422.333	505.996	1777.39	1316.89	814.268	0.73425	0.0115485	0.145865	590.657	1103.64
ARHGAP31-AS1	21.5484	6.78447	16.6583	31.6712	33.5435	12.0811	0.576806	0.202473	0.546033	14.1664	23.4885
ARHGAP32	223.863	142.474	230.093	191.294	118.023	178.801	-0.0111214	0.968256	0.991342	183.169	179.553
ARHGAP33	101.756	189.965	181.159	125.418	156.536	88.1922	-0.0363557	0.940579	0.983441	145.861	137.826
ARHGAP35	1142.06	993.925	1091.12	1016.01	1074.63	1048.64	-0.010894	0.952033	0.987169	1067.99	1057.6
ARHGAP39	2.39426	1.69612	3.12343	0	0	1.20811	-1.25076	0.482686	NA	2.04519	1.08289
ARHGAP4	2874.31	5398.74	3067.21	3567.44	3399.07	2605.9	-0.368965	0.191198	0.535282	4136.53	3159.91
ARHGAP42	70.6307	15.2651	26.0286	13.9353	37.2705	201.755	0.869274	0.326549	0.661905	42.9479	69.7473
ARHGAP44	16.7598	3.39224	3.12343	11.4016	8.69646	9.6649	-0.380836	0.668664	NA	10.076	8.2216
ARHGAP5	1338.39	831.098	991.169	903.262	1104.45	1058.31	-0.0566205	0.799899	0.933029	1084.75	1014.3
ARHGAP5-AS1	14.3656	3.39224	6.24687	11.4016	12.4235	9.6649	0.15089	0.811281	NA	8.8789	9.93423
ARHGAP6	247.806	259.506	325.878	230.566	64.6022	306.861	-0.162863	0.773632	0.92056	253.656	231.977
ARHGAP9	26467.4	34709.4	25344.6	28915.8	27070.8	23297.2	-0.218892	0.347151	0.678538	30588.4	26157.1
ARHGDIA	1176.78	3298.95	1681.45	2457.68	2282.2	1852.04	-0.0398299	0.90778	0.972831	2237.86	2068.34
ARHGDIB	78595.2	122677	90632.7	76532.8	66468.3	58456.9	-0.428685	0.0876831	0.380972	100636	73022.7
ARHGEF1	6041.92	10938.3	7185.98	8755.18	8251.69	5568.19	-0.172422	0.636538	0.859415	8490.09	7440.26
ARHGEF10	63.4479	47.4913	93.703	43.0728	49.694	15.7055	-0.158727	0.751915	0.912808	55.4696	50.5438
ARHGEF10L	161.613	83.1098	156.172	323.046	81.9952	148.598	0.533642	0.205051	0.547315	122.361	177.453
ARHGEF11	6161.63	9243.84	5251.53	8833.72	10030.7	7995.29	0.032623	0.863414	0.95799	7702.74	8027.82
ARHGEF12	1927.38	1904.74	2671.58	1515.15	2643.72	2393.27	0.262558	0.442202	0.747187	1916.06	2305.93
ARHGEF17	143.656	140.778	81.2093	105.148	186.353	35.0353	-0.627797	0.293705	0.634378	142.217	101.936
ARHGEF18	1507.19	1519.72	1667.91	1581.03	1832.47	1518.6	0.132168	0.537248	0.805689	1513.45	1650
ARHGEF19	254.989	237.457	152.007	74.744	114.296	224.709	-0.810483	0.0536767	0.30583	246.223	141.439
ARHGEF2	8446.96	8249.92	6634.17	7949.47	8562.28	6293.06	-0.20088	0.203391	0.546044	8348.44	7359.74
ARHGEF25	10.7742	3.39224	22.9052	7.60108	4.9694	8.45679	0.672376	0.345014	0.677039	7.08321	10.9831
ARHGEF26	19.1541	10.1767	19.7817	19.0027	37.2705	26.5785	0.787023	0.227012	0.571413	14.6654	25.6584
ARHGEF26-AS1	4.78852	6.78447	0	0	1.24235	0	-4.0365	0.024557	NA	5.7865	0.310588
ARHGEF28	5.98565	13.5689	28.1109	1.26685	4.9694	8.45679	-0.175593	0.837125	0.948202	9.7773	10.701
ARHGEF3	3004.8	2717.18	3715.84	3137.98	3282.29	2772.62	0.179415	0.248768	0.593519	2860.99	3227.18
ARHGEF33	7.18279	3.39224	2.08229	3.80054	6.21175	8.45679	0.0269408	0.976446	NA	5.28751	5.13784
ARHGEF34P	44.2938	45.7952	37.4812	12.6685	45.967	22.9541	-0.600585	0.275387	0.61758	45.0445	29.7677
ARHGEF35	38.3082	15.2651	46.8515	17.7359	52.1787	39.8677	0.560074	0.256704	0.600728	26.7866	39.1585
ARHGEF37	33.5197	22.0495	6.24687	17.7359	48.4517	30.2028	-0.201274	0.790328	NA	27.7846	25.6593
ARHGEF39	95.7705	66.1486	89.5384	43.0728	86.9646	73.6949	-0.14103	0.727019	0.902852	80.9595	73.3177
ARHGEF4	20.3512	25.4418	23.9463	29.1375	18.6353	12.0811	-0.122388	0.83497	0.947797	22.8965	20.95
ARHGEF40	12395.1	25292.5	12197	9269.52	8000.74	9204.61	-0.903038	0.0154838	0.167167	18843.8	9667.97
ARHGEF5	107.742	96.6787	109.32	49.407	150.324	68.8624	-0.100345	0.816172	0.940693	102.21	94.4785
ARHGEF6	9368.75	10509.1	8692.51	9582.43	8830.63	8106.44	-0.180788	0.234996	0.580506	9938.95	8803
ARHGEF7	1960.9	2425.45	2058.34	2130.84	1878.43	2117.82	-0.0929425	0.487736	0.775458	2193.17	2046.36
ARHGEF9	508.781	495.267	596.576	197.628	285.741	334.647	-0.589467	0.00286967	0.0719441	502.024	353.648
ARHGEF9-IT1	2.39426	5.08835	5.20572	1.26685	0	4.83245	-0.454026	0.674155	NA	3.74131	2.82625
ARID1A	9791.33	13214.5	9234.95	9725.58	12962.7	9767.59	-0.141116	0.284603	0.627258	11502.9	10422.7
ARID1B	2713.9	2340.64	2994.33	3051.83	3145.63	2482.67	0.213597	0.165133	0.500593	2527.27	2918.62
ARID2	2393.06	2783.33	2383.18	2118.17	2433.77	1896.74	-0.224328	0.102223	0.40605	2588.2	2207.96
ARID3A	715.884	1423.04	568.465	877.925	1124.33	717.619	-0.373503	0.135994	0.457739	1069.46	822.084
ARID3B	2688.76	3721.28	2212.43	2627.44	2720.75	2804.03	-0.29823	0.0122727	0.150681	3205.02	2591.16
ARID3C	4.78852	0	0	0	4.9694	3.62434	-0.508745	0.832698	NA	2.39426	2.14844
ARID4A	7956.13	11263.9	6138.59	6825.77	9234.39	8255.03	-0.332727	0.0392802	0.265141	9610.03	7613.45
ARID4B	10483.3	15806.1	9182.89	13191.7	17240.1	12240.6	-0.0334439	0.837391	0.948202	13144.7	12963.8
ARID5A	946.931	3061.49	1093.2	2263.86	2764.23	1159.79	-0.0530138	0.884099	0.964422	2004.21	1820.27
ARID5B	2803.68	1913.22	2531.02	3135.45	5271.29	4668.15	0.684312	0.0371559	0.260168	2358.45	3901.48
ARIH1	5752.21	6988.01	5100.57	5666.61	5412.92	5110.32	-0.254347	0.0254597	0.214684	6370.11	5322.6
ARIH2	3513.58	3304.04	4097.94	3396.42	3566.79	3294.52	0.0771924	0.461077	0.75903	3408.81	3588.92
ARIH2OS	15.5627	47.4913	55.1807	68.4097	58.3905	50.7407	0.942055	0.0313791	0.238245	31.527	58.1804
ARL1	761.375	415.549	754.83	481.402	578.936	819.1	0.206113	0.267663	0.610638	588.462	658.567
ARL10	68.2365	40.7068	79.127	21.5364	37.2705	21.746	-0.503563	0.12226	0.439489	54.4716	39.92
ARL11	2412.22	2964.81	1175.45	2235.99	2400.22	2334.07	-0.463803	0.0963192	0.396956	2688.52	2036.43
ARL13A	52.6738	13.5689	36.4401	26.6038	23.6047	25.3704	-0.129473	0.781234	0.924426	33.1214	28.0047
ARL13B	271.749	222.191	232.175	220.431	260.894	273.033	0.0079771	0.965597	0.990968	246.97	246.633
ARL14	0	1.69612	0	0	1.24235	0	-0.977281	0.795072	NA	0.848059	0.310588
ARL14EP	393.856	271.379	614.275	321.779	327.981	450.626	0.36209	0.103797	0.408247	332.617	428.665
ARL14EPL	0	0	1.04114	5.06739	0	1.20811	2.69361	0.312855	NA	0	1.82916
ARL15	1211.5	905.727	666.332	1154.1	614.964	964.074	-0.331782	0.191444	0.535282	1058.61	849.867
ARL16	435.756	347.704	454.98	400.324	319.284	358.809	-0.0242886	0.921351	0.976509	391.73	383.349
ARL17A	1261.78	1975.98	1046.35	578.949	947.914	524.321	-1.12075	0.00330129	0.0766046	1618.88	774.383
ARL2	4.78852	6.78447	12.4937	8.86793	9.93881	8.45679	0.833223	0.244595	NA	5.7865	9.93931
ARL2BP	1078.61	810.744	1228.55	1122.43	1070.91	1063.14	0.256014	0.0151005	0.165464	944.68	1121.26
ARL3	834.4	1073.64	681.95	730.971	653.477	483.245	-0.57397	0.0145508	0.162237	954.022	637.41
ARL4A	1814.85	2552.66	1563.8	2113.1	1875.95	2140.78	-0.180422	0.500293	0.784253	2183.75	1923.41
ARL4C	2347.57	2880.01	4787.18	1252.91	808.77	1894.32	-0.564527	0.192896	0.535858	2613.79	2185.8
ARL4D	27.534	16.9612	16.6583	11.4016	24.847	16.9136	-0.291839	0.626447	0.854529	22.2476	17.4551
ARL5A	1778.94	1368.77	1497.17	1567.09	1454.79	1798.88	0.0138801	0.928988	0.979393	1573.85	1579.48
ARL5B	946.931	2094.71	923.495	1550.62	1644.87	1569.34	-0.0401083	0.91172	0.973767	1520.82	1422.08
ARL5C	3.59139	0	2.08229	1.26685	4.9694	0	0.0656075	0.958788	NA	1.7957	2.07963
ARL6	64.6451	27.1379	33.3166	32.938	27.3317	26.5785	-0.573786	0.0889591	0.382621	45.8915	30.0412
ARL6IP1	5839.6	5403.83	4312.42	4382.02	4518.43	3927.57	-0.397814	0.00877909	0.126918	5621.72	4285.11
ARL6IP4	699.124	634.348	816.257	871.591	913.128	704.33	0.313558	0.192315	0.53546	666.736	826.326
ARL6IP5	8815.67	10047.8	8732.08	9222.65	9511.44	6798.05	-0.143349	0.377215	0.701034	9431.74	8566.05
ARL6IP6	1088.19	1355.2	989.087	1340.32	1392.68	1019.65	-0.0618713	0.758788	0.915279	1221.7	1185.43
ARL8A	2543.9	4649.06	2213.47	4243.94	3985.46	2895.85	-0.110565	0.551236	0.815132	3596.48	3334.68
ARL8B	3555.48	2622.2	2611.19	4183.13	3568.03	3874.42	0.159187	0.391418	0.710899	3088.84	3559.19
ARL9	0	0	4.16458	1.26685	1.24235	7.24868	3.65299	0.0621999	NA	0	3.48061
ARMC1	418.996	251.025	444.569	342.049	284.498	384.18	0.146056	0.484732	0.773421	335.011	363.824
ARMC10	544.695	502.051	465.392	619.488	414.945	415.591	-0.145625	0.427829	0.737402	523.373	478.854
ARMC12	301.677	483.394	210.311	135.553	331.708	253.704	-0.736808	0.262986	0.606293	392.535	232.819
ARMC2	319.634	630.956	458.104	395.256	329.223	253.704	-0.352518	0.21922	0.564406	475.295	359.072
ARMC2-AS1	35.9139	67.8447	21.864	36.7386	18.6353	39.8677	-0.790582	0.121032	0.437883	51.8793	29.2764
ARMC3	40.7025	78.0214	41.6458	38.0054	16.1506	31.4109	-0.892098	0.10927	0.417146	59.3619	31.8032
ARMC4	0	1.69612	5.20572	1.26685	0	0	0.767339	0.711766	NA	0.848059	1.61814
ARMC5	32.3225	89.8943	131.184	95.0135	85.7222	74.903	0.6864	0.119175	0.433899	61.1084	96.7057
ARMC6	65.8422	93.2865	118.69	124.151	142.87	147.39	0.734011	0.0758255	0.358951	79.5644	133.275
ARMC7	397.447	517.316	451.857	736.038	603.783	485.661	0.288818	0.0993286	0.402026	457.382	569.335
ARMC8	3289.72	3524.53	2540.39	3073.37	3104.63	2938.13	-0.23636	0.0202052	0.190237	3407.12	2914.13
ARMC9	5.98565	5.08835	7.28801	2.53369	4.9694	10.873	0.186268	0.818314	NA	5.537	6.41603
ARMCX1	16.7598	10.1767	15.6172	16.469	19.8776	21.746	0.498452	0.367659	0.694478	13.4683	18.4275
ARMCX2	74.2221	23.7457	66.6332	31.6712	206.23	22.9541	0.785601	0.255736	0.599592	48.9839	81.8722
ARMCX3	2315.25	2133.72	1663.75	1812.86	2025.03	2425.89	-0.166126	0.439464	0.744962	2224.48	1981.88
ARMCX4	682.365	720.85	652.798	570.081	741.684	607.681	-0.121628	0.533919	0.80397	701.607	643.061
ARMCX5	227.455	286.644	270.698	214.097	155.294	270.617	-0.184028	0.403637	0.720395	257.049	227.676
ARMCX5-GPRASP2	16.7598	10.1767	9.3703	8.86793	4.9694	8.45679	-0.739804	0.170636	NA	13.4683	7.91611
ARMCX6	424.981	395.196	433.116	426.927	444.762	582.31	0.20267	0.204003	0.547051	410.089	471.779
ARMT1	1456.91	1328.06	1207.73	1573.42	1487.09	1582.63	0.054666	0.747002	0.912202	1392.48	1462.72
ARNT	4814.86	4913.65	2795.47	4171.73	5168.18	3687.16	-0.337788	0.070406	0.347656	4864.26	3955.63
ARNT2	3.59139	3.39224	8.32916	1.26685	23.6047	0	1.27717	0.488019	NA	3.49181	8.30017
ARNTL	5626.52	8451.76	3838.7	4430.16	4324.62	3527.69	-0.782335	1.82545e-07	0.000159968	7039.14	4030.29
ARNTL2	96.9676	35.6185	60.3864	130.485	125.477	231.958	0.978756	0.0987416	0.401469	66.293	137.077
ARPC1A	1723.87	2286.37	1713.72	2379.14	2531.91	2139.57	0.113344	0.266011	0.609249	2005.12	2191.09
ARPC1B	3075.43	4954.36	3716.89	4878.63	4801.69	3620.71	0.0870661	0.715263	0.897804	4014.9	4254.48
ARPC2	34491.7	53337.8	37185.5	40441.6	40920.6	35976.4	-0.161668	0.262969	0.606293	43914.8	38631
ARPC3	33474.2	58405.8	33403	46457.8	36189.7	33070.9	-0.266555	0.12644	0.44422	45940	37280.4
ARPC4	6260.99	9652.61	7364.01	8353.59	6599.37	6125.13	-0.137922	0.476702	0.769543	7956.8	7110.53
ARPC5	22055.9	22941.7	20219	20885.2	30243.8	17898.2	-0.0271421	0.91742	0.975655	22498.8	22311.6
ARPC5L	1576.62	1528.2	1433.66	1306.12	1079.6	1405.03	-0.252494	0.359904	0.687457	1552.41	1306.1
ARPIN	658.422	437.598	254.039	1455.61	387.613	781.649	0.179783	0.701948	0.891745	548.01	719.727
ARPP19	8601.39	9009.78	7855.43	7407.25	6962.13	9059.64	-0.170325	0.197256	0.540411	8805.58	7821.12
ARPP21	1.19713	0	1.04114	0	0	0	-0.854305	0.805352	NA	0.598565	0.260286
ARR3	108.939	57.668	62.4687	82.3451	101.873	61.6137	-0.12453	0.69285	0.886892	83.3035	77.0751
ARRB1	5347.58	4513.37	4788.22	5112.99	4061.25	5744.58	-0.00107001	0.996571	0.999034	4930.48	4926.76
ARRB2	48747.2	75614.6	41964.4	65626.5	67432.3	47378.6	-0.170855	0.229494	0.57394	62180.9	55600.4
ARRDC1	555.469	849.755	617.399	865.257	693.232	502.575	-0.0716522	0.843553	0.950222	702.612	669.615
ARRDC1-AS1	128.093	98.3749	135.349	87.4124	111.812	100.273	-0.0453826	0.837804	0.948284	113.234	108.712
ARRDC2	2254.2	1763.96	2650.75	2144.77	2115.72	1736.06	0.126546	0.560045	0.819928	2009.08	2161.83
ARRDC3	11304.5	9642.43	6310.38	5833.83	7886.44	7321.16	-0.629204	0.0521955	0.302289	10473.5	6837.95
ARRDC3-AS1	161.613	149.258	144.719	152.022	152.809	190.882	0.0415465	0.850318	0.953023	155.436	160.108
ARRDC4	2470.88	1982.76	2324.88	3018.9	1622.51	1884.66	-0.0241569	0.954955	0.987269	2226.82	2212.73
ARRDC5	164.007	210.319	181.159	105.148	156.536	153.43	-0.340534	0.368475	0.694785	187.163	149.068
ARSA	1033.12	1940.36	1314.97	971.672	1105.69	865.009	-0.463651	0.125405	0.443398	1486.74	1064.33
ARSB	1209.1	831.098	889.137	2181.51	2589.06	1386.91	0.62605	0.0266035	0.219743	1020.1	1761.66
ARSD	1266.56	1039.72	1120.27	1276.98	1708.23	1095.76	0.164238	0.439415	0.744962	1153.14	1300.31
ARSG	1252.2	2929.2	1025.53	985.607	1284.59	1009.98	-0.920506	0.011969	0.148539	2090.7	1076.43
ARSJ	0	1.69612	10.4114	1.26685	1.24235	2.41623	2.10294	0.194042	NA	0.848059	3.83422
ARSK	87.3906	50.8835	66.6332	32.938	57.1481	76.1111	-0.193072	0.590177	0.837727	69.1371	58.2076
ART1	5.98565	27.1379	7.28801	6.33424	7.45411	2.41623	-1.31855	0.111295	NA	16.5618	5.87314
ART3	2.39426	1.69612	3.12343	1.26685	2.4847	0	-0.315876	0.800098	NA	2.04519	1.71875
ARTN	2.39426	0	1.04114	0	0	2.41623	-0.355474	0.843839	NA	1.19713	0.864342
ARV1	233.441	145.866	206.147	238.167	228.593	256.12	0.312172	0.203261	0.546044	189.653	232.257
ARVCF	11.9713	20.3534	32.2755	5.06739	19.8776	10.873	-0.124875	0.872431	0.960355	16.1624	17.0234
ASAH1	28828.1	51872.4	30997	27138.4	23302.8	31609.1	-0.455694	0.121852	0.439397	40350.2	28261.8
ASAH2	0	1.69612	0	0	0	1.20811	-1.0226	0.682773	NA	0.848059	0.302028
ASAH2B	7.18279	1.69612	5.20572	6.33424	3.72705	1.20811	-0.167634	0.833752	0.947298	4.43945	4.11878
ASAP1	14207.5	21238.8	10530.1	23082	30124.5	13888.5	0.00443992	0.986761	0.995813	17723.2	19406.3
ASAP1-IT1	2.39426	10.1767	12.4937	5.06739	13.6659	3.62434	0.65754	0.434722	NA	6.28549	8.71283
ASAP1-IT2	59.8565	115.336	81.2093	92.4798	147.84	31.4109	0.0333868	0.944061	0.984586	87.5963	88.2349
ASAP2	328.014	352.793	438.322	238.167	94.4187	364.85	-0.379912	0.543661	0.80919	340.403	283.939
ASAP3	27.534	8.48059	18.7406	43.0728	22.3623	37.4515	0.660616	0.367486	0.694478	18.0073	30.4068
ASB1	1449.73	1696.12	1489.88	1607.63	1418.76	1112.67	-0.161278	0.389316	0.71016	1572.92	1407.24
ASB11	0	1.69612	2.08229	0	1.24235	0	0.031962	0.987213	NA	0.848059	0.83116
ASB12	3.59139	1.69612	6.24687	0	1.24235	3.62434	-0.254397	0.827643	NA	2.64376	2.77839
ASB13	165.204	83.1098	174.912	178.625	142.87	102.69	0.334043	0.24357	0.588999	124.157	149.774
ASB14	281.326	145.866	173.871	169.758	255.924	169.136	-0.145071	0.611679	0.847835	213.596	192.172
ASB15	1.19713	3.39224	4.16458	6.33424	8.69646	3.62434	1.41102	0.211628	NA	2.29468	5.7049
ASB16	532.723	551.238	340.454	304.043	314.315	403.51	-0.669318	0.00146743	0.049723	541.981	340.58
ASB16-AS1	527.935	483.394	417.499	437.062	539.18	419.215	-0.149448	0.541814	0.808124	505.664	453.239
ASB2	14.3656	5.08835	21.864	10.1348	12.4235	31.4109	1.01199	0.123604	0.441855	9.72696	18.9583
ASB3	49.0824	35.6185	44.7692	13.9353	18.6353	22.9541	-0.791787	0.0449973	0.281435	42.3504	25.0735
ASB6	897.848	1183.89	1035.94	891.86	864.676	961.658	-0.136564	0.483409	0.772854	1040.87	938.533
ASB7	2431.37	3327.78	2214.51	2870.68	3072.33	2155.27	-0.165043	0.225817	0.570572	2879.58	2578.2
ASB8	2958.11	4153.79	2941.23	3893.02	3741.96	3887.71	0.025433	0.840919	0.94962	3555.95	3615.98
ASB9	19.1541	6.78447	17.6995	10.1348	22.3623	2.41623	0.113415	0.878557	0.962631	12.9693	13.1532
ASB9P1	153.233	230.672	56.2218	183.693	213.684	223.501	-0.321812	0.453852	0.755425	191.952	169.275
ASCC1	1511.98	1400.99	1035.94	1480.94	1311.92	1304.76	-0.198344	0.471524	0.765699	1456.48	1283.39
ASCC2	1143.26	1153.36	1245.21	1610.16	1304.47	1500.48	0.297078	0.0395745	0.266241	1148.31	1415.08
ASCC3	1300.08	673.359	1322.25	1350.46	1070.91	1608	0.481604	0.0364141	0.257014	986.722	1337.9
ASCL2	9.57705	22.0495	37.4812	48.1402	22.3623	26.5785	1.1183	0.0257329	0.216499	15.8133	33.6405
ASCL3	1.19713	0	1.04114	0	1.24235	0	-0.175722	0.928455	NA	0.598565	0.570874
ASF1A	239.426	162.827	279.027	176.092	165.233	254.912	0.134118	0.624574	0.853754	201.127	218.816
ASF1B	381.885	451.167	475.803	342.049	188.837	304.444	-0.3645	0.384796	0.706168	416.526	327.783
ASGR1	50.2795	27.1379	48.9338	97.5472	60.8752	50.7407	0.694586	0.149752	0.476286	38.7087	64.5242
ASGR2	557.863	776.822	804.805	2285.39	1252.29	585.935	0.76256	0.0805032	0.367271	667.343	1232.11
ASH1L	7699.95	7717.34	5643	7294.51	8331.21	7057.79	-0.142743	0.252366	0.596938	7708.64	7081.63
ASH1L-AS1	57.4623	72.9331	92.6619	89.9461	90.6916	77.3192	0.438712	0.199385	0.542487	65.1977	87.6547
ASH2L	1704.71	1635.06	1505.49	2163.77	2381.59	2021.17	0.247203	0.0831767	0.372773	1669.89	2018.01
ASIC1	10.7742	6.78447	14.576	3.80054	6.21175	3.62434	-0.392987	0.61674	0.850592	8.77933	7.05316
ASIC3	55.068	42.403	56.2218	39.2723	67.087	45.9083	0.134953	0.760473	0.915779	48.7355	52.1223
ASIC4	3.59139	0	1.04114	5.06739	3.72705	1.20811	0.931595	0.637858	NA	1.7957	2.76092
ASIP	2.39426	0	2.08229	0	3.72705	0	-0.0906479	0.957267	NA	1.19713	1.45234
ASL	723.067	975.268	803.763	604.286	793.862	791.314	-0.177034	0.568309	0.824647	849.168	748.306
ASNA1	417.799	585.161	633.016	871.591	701.928	742.989	0.545136	0.0896349	0.383981	501.48	737.381
ASNS	931.368	1080.43	1277.48	610.62	884.554	735.741	-0.23658	0.510027	0.790164	1005.9	877.1
ASNSD1	2048.29	2790.11	1838.66	2992.29	2690.93	1691.36	-0.0961909	0.655614	0.868456	2419.2	2303.31
ASPDH	40.7025	27.1379	33.3166	22.8032	57.1481	26.5785	0.109636	0.830859	0.94617	33.9202	34.9616
ASPH	16060.7	34168.3	6301.01	6055.53	16171.7	14276.3	-1.17692	0.0280882	0.22625	25114.5	10701.1
ASPHD1	7.18279	0	2.08229	5.06739	12.4235	6.04056	0.63748	0.545088	NA	3.59139	6.40344
ASPHD2	155.627	161.131	148.884	254.636	301.891	240.414	0.531212	0.0724244	0.352003	158.379	236.456
ASPM	184.358	140.778	396.676	140.62	252.197	740.573	1.25016	0.0329433	0.243717	162.568	382.517
ASPN	2.39426	0	2.08229	0	4.9694	2.41623	1.26546	0.49385	NA	1.19713	2.36698
ASPRV1	1446.13	2912.23	1819.92	2846.61	2425.07	2425.89	0.178391	0.477151	0.769851	2179.18	2379.37
ASPSCR1	74.2221	89.8943	114.526	126.685	109.327	125.644	0.53082	0.177038	0.516863	82.0582	119.045
ASRGL1	130.487	132.297	203.023	184.96	231.077	224.709	0.688178	0.0468199	0.28695	131.392	210.942
ASS1	8.37992	1.69612	0	0	3.72705	0	-2.70313	0.271614	NA	5.03802	0.931763
ASTE1	233.441	249.329	276.944	217.898	327.981	332.231	0.26158	0.240647	0.586219	241.385	288.763
ASTL	5.98565	5.08835	11.4526	2.53369	2.4847	2.41623	-0.409883	0.674777	NA	5.537	4.7218
ASTN2	16.7598	1.69612	14.576	6.33424	6.21175	7.24868	-0.0901087	0.900432	0.970936	9.22798	8.59267
ASTN2-AS1	2.39426	1.69612	4.16458	0	2.4847	1.20811	-0.211841	0.887751	NA	2.04519	1.96435
ASUN	654.831	344.312	580.959	475.068	463.397	569.021	0.0989539	0.59705	0.842569	499.571	522.111
ASXL1	4078.63	4104.61	3887.63	3882.89	3336.95	4074.96	-0.105606	0.430052	0.738464	4091.62	3795.61
ASXL2	2199.13	2589.97	1687.7	1977.55	2743.11	2247.09	-0.157993	0.304743	0.644693	2394.55	2163.86
ASXL3	2.39426	15.2651	5.20572	3.80054	0	3.62434	-0.982143	0.494256	NA	8.82966	3.15765
ATAD1	1577.82	1487.5	1196.27	1227.57	1369.07	1541.55	-0.194901	0.204976	0.547312	1532.66	1333.62
ATAD2	730.25	486.786	1051.56	608.087	836.102	1071.6	0.560762	0.00557703	0.0999444	608.518	891.835
ATAD2B	1862.74	1752.09	1499.25	1873.67	2502.09	1627.33	0.0307059	0.86569	0.959295	1807.41	1875.58
ATAD3A	25.1397	33.9224	38.5223	34.2049	32.3011	48.3245	0.386496	0.37312	0.697418	29.5311	38.3382
ATAD3B	52.6738	47.4913	114.526	63.3424	72.0564	103.898	0.808428	0.0659785	0.337967	50.0825	88.4556
ATAD3C	9.57705	13.5689	14.576	8.86793	4.9694	13.2892	-0.129349	0.847595	NA	11.573	10.4256
ATAD5	336.394	220.495	425.828	300.243	373.948	469.956	0.519667	0.0414921	0.272333	278.445	392.494
ATAT1	332.802	378.234	318.59	243.235	267.105	233.166	-0.413855	0.0041576	0.0874969	355.518	265.524
ATE1	1127.7	1060.07	1261.87	1169.3	1145.45	1032.94	0.0753609	0.515891	0.793039	1093.89	1152.39
ATE1-AS1	7.18279	11.8728	7.28801	20.2696	13.6659	14.4974	0.513251	0.542326	NA	9.52781	13.9302
ATF1	960.099	771.734	840.204	891.86	859.707	921.79	0.0238117	0.883499	0.964422	865.916	878.39
ATF2	3917.01	4029.98	3099.49	3910.76	3462.43	3617.09	-0.182465	0.179254	0.518938	3973.49	3522.44
ATF3	162.81	178.092	187.406	1223.77	530.484	213.836	1.33985	0.173212	0.510582	170.451	538.875
ATF4	16880.7	16143.7	16057.6	18953.3	13417.4	17112.9	-0.0212476	0.909025	0.973326	16512.2	16385.3
ATF5	195.132	149.258	189.488	744.906	274.56	514.656	1.17743	0.00757162	0.119762	172.195	430.902
ATF6	7647.27	13857.3	4441.52	8694.37	9569.83	7271.63	-0.538461	0.000761268	0.0356579	10752.3	7494.34
ATF6B	3080.22	4274.22	3957.39	4083.05	4503.52	3434.66	0.120763	0.607598	0.846591	3677.22	3994.66
ATF7	3037.12	2856.26	2280.11	3150.65	3493.49	3010.62	-0.0132369	0.928534	0.979253	2946.69	2983.72
ATF7IP	14089	12081.4	13369.3	12031.2	15585.3	14162.7	0.0753366	0.591661	0.838584	13085.2	13787.1
ATF7IP2	536.315	368.058	603.864	287.574	330.465	320.15	-0.240566	0.262452	0.606293	452.186	385.513
ATG10	323.225	340.92	263.41	402.857	291.952	385.388	0.00114112	0.99626	0.998934	332.073	335.902
ATG101	154.43	212.015	236.34	323.046	245.985	250.079	0.510755	0.066476	0.338889	183.222	263.863
ATG12	3073.04	3867.15	2581	3595.31	3628.91	3184.58	-0.108222	0.25539	0.599346	3470.09	3247.45
ATG13	3193.95	4226.73	3304.59	3936.09	3932.04	3786.22	0.012889	0.882044	0.964119	3710.34	3739.74
ATG14	1610.14	1572.3	1791.81	1683.64	1448.58	1701.02	0.0600024	0.618378	0.851515	1591.22	1656.26
ATG16L1	2093.78	1808.06	1978.17	1736.85	1569.09	1773.51	-0.140632	0.226022	0.570572	1950.92	1764.41
ATG16L2	20405.1	30284.2	20909.3	20946	26204.9	18554.2	-0.211248	0.513478	0.791948	25344.6	21653.6
ATG2A	1563.45	5191.82	2477.92	1612.7	1579.03	2429.51	-0.590476	0.190729	0.534686	3377.64	2024.79
ATG2B	5275.76	6005.95	4231.21	4288.28	4109.7	4757.55	-0.373628	0.046383	0.286032	5640.86	4346.68
ATG3	7091.8	7082.99	5799.17	10732.7	10184.8	6793.22	0.157128	0.483673	0.772946	7087.4	8377.48
ATG4A	537.512	500.355	503.914	497.871	514.333	829.973	0.176189	0.472198	0.766236	518.933	586.523
ATG4B	875.103	1233.08	1146.3	1000.81	893.25	896.42	-0.104665	0.629693	0.855214	1054.09	984.195
ATG4C	393.856	186.573	283.191	220.431	325.496	345.52	0.10005	0.72101	0.900755	290.215	293.66
ATG4D	245.412	676.751	289.438	466.2	455.943	358.809	-0.111602	0.744081	0.910838	461.081	392.598
ATG5	1404.23	1345.02	1251.46	1670.97	1321.86	1427.99	0.0311998	0.800907	0.933463	1374.63	1418.07
ATG7	2546.3	3266.72	1835.54	3131.65	3180.42	2744.83	-0.136195	0.409449	0.724793	2906.51	2723.11
ATG9A	4211.51	4969.63	2560.17	2631.24	3001.52	3022.7	-0.710093	0.0198933	0.188608	4590.57	2803.91
ATG9B	17.957	20.3534	70.7978	16.469	9.93881	13.2892	0.269585	0.661549	0.871835	19.1552	27.6237
ATHL1	9474.09	16618.6	10031.4	6393.78	14975.3	11257.2	-0.281577	0.499638	0.783872	13046.3	10664.4
ATIC	762.572	400.284	856.862	420.593	408.733	878.298	0.163795	0.481509	0.771895	581.428	641.122
ATL1	130.487	71.237	127.02	83.6119	40.9976	97.8571	-0.19139	0.660232	0.87079	100.862	87.3716
ATL2	2045.9	2479.72	1668.95	1198.44	1488.34	1420.74	-0.646973	0.000131805	0.0144606	2262.81	1444.12
ATL3	1687.95	1555.34	1814.71	1753.32	2103.3	1711.9	0.187271	0.143199	0.466853	1621.65	1845.81
ATM	14230.3	13097.4	19136.2	10053.7	11346.4	13485	-0.0509737	0.745132	0.910898	13663.9	13505.3
ATMIN	1668.8	1222.9	1883.43	1674.77	1393.92	1659.95	0.201471	0.199394	0.542487	1445.85	1653.02
ATN1	318.437	169.612	415.417	276.173	524.272	259.744	0.674498	0.0779919	0.363265	244.024	368.901
ATOH7	4.78852	1.69612	10.4114	8.86793	1.24235	4.83245	0.952709	0.47885	NA	3.24232	6.33854
ATOH8	143.656	161.131	12.4937	35.4717	90.6916	82.1517	-1.68587	0.0323717	0.241697	152.393	55.2022
ATOX1	265.763	371.45	471.638	641.025	475.82	549.691	0.744698	5.11033e-05	0.00783477	318.606	534.544
ATP10A	302.874	251.025	764.2	414.259	427.369	373.307	0.806184	0.00902839	0.128356	276.95	494.784
ATP10B	2.39426	0	0	1.26685	0	1.20811	-1.05782	0.502788	NA	1.19713	0.61874
ATP10D	1177.98	583.465	781.899	1241.51	1185.2	1036.56	0.29619	0.238496	0.583406	880.721	1061.29
ATP11A	7115.75	12071.3	6478	7556.74	9949.99	7908.31	-0.248569	0.203287	0.546044	9593.51	7973.26
ATP11A-AS1	77.8135	123.817	22.9052	63.3424	100.63	84.5679	-0.658848	0.183675	0.524123	100.815	67.8615
ATP11AUN	17.957	6.78447	5.20572	3.80054	17.3929	19.3298	-0.210503	0.792171	NA	12.3707	11.4322
ATP11B	14784.6	28691.5	10212.6	18012	27533	17079.1	-0.271498	0.226465	0.571208	21738.1	18209.2
ATP11C	1288.11	1180.5	1208.77	1885.07	1658.54	1362.75	0.281784	0.0520413	0.301981	1234.31	1528.78
ATP13A1	529.132	420.637	608.028	823.451	888.281	770.776	0.719073	0.0112913	0.144751	474.885	772.634
ATP13A2	148.444	128.905	192.612	190.027	221.138	120.811	0.400339	0.253774	0.597629	138.675	181.147
ATP13A3	2843.19	2557.75	2446.69	3262.13	2751.81	3248.61	0.0958585	0.572769	0.82818	2700.47	2927.31
ATP13A4	195.132	76.3253	77.0447	43.0728	39.7552	112.354	-0.894015	0.107279	0.415791	135.729	68.0568
ATP13A4-AS1	1.19713	0	0	1.26685	0	0	-0.955498	0.665222	NA	0.598565	0.316712
ATP13A5	8.37992	25.4418	3.12343	2.53369	0	3.62434	-2.87386	0.0050994	NA	16.9108	2.32037
ATP13A5-AS1	2.39426	6.78447	0	0	3.72705	0	-2.43899	0.0758694	NA	4.58937	0.931763
ATP1A1	3542.31	4214.85	5077.66	6449.52	4412.83	5134.48	0.432866	0.0369804	0.260029	3878.58	5268.62
ATP1A1-AS1	44.2938	86.502	59.3452	87.4124	49.694	66.4462	0.0386724	0.92461	0.97726	65.3979	65.7245
ATP1A2	0	0	0	0	0	0	0	1	NA	0	0
ATP1A3	43.0967	35.6185	65.5921	32.938	33.5435	56.7813	0.246243	0.611776	0.847835	39.3576	47.2137
ATP1A4	3.59139	40.7068	41.6458	36.7386	29.8164	0	0.2561	0.885044	0.964652	22.1491	27.0502
ATP1B1	93.3762	33.9224	44.7692	64.6092	14.9082	94.2328	-0.144474	0.832548	0.946579	63.6493	54.6299
ATP1B2	5.98565	3.39224	4.16458	43.0728	8.69646	6.04056	0.923139	0.426542	NA	4.68895	15.4936
ATP1B3	1689.15	1334.85	1639.8	2852.94	1816.32	2365.48	0.510112	0.0887944	0.382547	1512	2168.64
ATP2A1	190.344	150.955	117.649	179.892	147.84	124.436	-0.298261	0.171757	0.509255	170.649	142.454
ATP2A2	4662.83	3360.01	4108.36	5647.6	4472.46	5167.1	0.266805	0.178061	0.518157	4011.42	4848.88
ATP2A3	4668.81	6670.83	5504.53	4012.1	5535.92	4138.99	-0.235735	0.40152	0.718935	5669.82	4797.89
ATP2B1	9020.38	11874.5	6763.27	8442.27	5483.74	7533.79	-0.547473	0.0446992	0.280445	10447.5	7055.77
ATP2B2	13.1684	8.48059	23.9463	15.2022	17.3929	13.2892	0.63588	0.298966	NA	10.8245	17.4577
ATP2B4	8893.49	13046.5	8504.07	8297.85	14595.1	8995.61	-0.116796	0.581782	0.833539	10970	10098.2
ATP2C1	2618.13	2037.04	2428.99	2498.22	2714.54	2580.53	0.136665	0.295885	0.635605	2327.58	2555.57
ATP2C2	148.444	571.592	269.656	171.024	192.564	128.06	-0.738105	0.137615	0.459845	360.018	190.326
ATP5A1	5918.62	3850.19	6717.46	6483.72	5851.47	8413.3	0.509714	0.00489986	0.0949996	4884.4	6866.49
ATP5B	11730.7	8706.17	10065.8	12617.8	10417.1	11990.5	0.130267	0.419432	0.73056	10218.4	11272.8
ATP5C1	2807.27	2282.98	2579.96	2958.09	2379.1	3028.74	0.100633	0.511683	0.790566	2545.12	2736.47
ATP5D	16.7598	20.3534	44.7692	19.0027	18.6353	19.3298	0.364467	0.60755	0.846591	18.5566	25.4342
ATP5E	3.59139	0	4.16458	1.26685	3.72705	1.20811	0.579631	0.72537	NA	1.7957	2.59165
ATP5F1	4370.73	5508.99	4375.93	4653.13	3763.08	4807.08	-0.163966	0.359022	0.687077	4939.86	4399.81
ATP5G1	703.913	366.362	680.908	713.235	515.576	924.206	0.436479	0.116635	0.429556	535.137	708.481
ATP5G2	4808.87	3765.38	4607.06	6237.95	4492.34	5286.7	0.257961	0.124973	0.442744	4287.13	5156.02
ATP5G3	1333.6	1041.42	1359.73	1516.42	1354.16	1815.79	0.352593	0.113875	0.425698	1187.51	1511.53
ATP5H	2272.15	2106.58	2472.72	2939.09	2502.09	2411.39	0.225311	0.236887	0.581497	2189.37	2581.32
ATP5I	616.522	881.981	829.792	914.664	767.773	798.562	0.137044	0.62518	0.853776	749.252	827.698
ATP5J	1614.93	1577.39	1685.61	2191.65	1580.27	1710.69	0.152821	0.460426	0.75903	1596.16	1792.05
ATP5J2	132.882	132.297	186.365	244.501	124.235	172.76	0.444928	0.0766534	0.360998	132.589	181.965
ATP5L	5797.71	6033.09	6103.19	7299.57	5160.73	5628.6	0.0253593	0.859727	0.956465	5915.4	6048.02
ATP5L2	0	5.08835	4.16458	5.06739	2.4847	0	0.4908	0.676727	NA	2.54418	2.92917
ATP5O	2571.44	2189.69	2673.66	3545.9	2293.38	2991.29	0.262939	0.0989377	0.401519	2380.56	2876.06
ATP5S	234.638	249.329	256.122	257.17	196.291	242.831	-0.0202078	0.9199	0.975902	241.984	238.103
ATP5SL	260.975	239.153	332.125	362.318	376.432	315.317	0.465075	0.0082286	0.123943	250.064	346.548
ATP6AP1	6347.19	9579.68	5773.15	6193.62	6548.43	4849.36	-0.423369	0.0316405	0.238774	7963.43	5841.14
ATP6AP1L	140.064	74.6292	155.131	95.0135	70.814	136.517	0.107607	0.812664	0.938593	107.347	114.369
ATP6AP2	8458.93	9905.33	7039.18	8837.53	6749.69	7585.74	-0.290119	0.0490103	0.293394	9182.13	7553.03
ATP6V0A1	5020.77	4574.43	3272.32	4897.63	5251.42	4114.83	-0.188692	0.394977	0.714324	4797.6	4384.05
ATP6V0A2	1539.51	1273.78	1507.58	1298.52	1499.52	1187.57	-0.0234998	0.899092	0.970258	1406.65	1373.3
ATP6V0B	16206.8	28903.6	16242.9	19881.9	16577.9	15250	-0.350426	0.0947887	0.393426	22555.2	16988.2
ATP6V0C	890.665	1640.15	1014.07	1107.22	983.942	970.114	-0.266898	0.210934	0.554109	1265.41	1018.84
ATP6V0D1	5304.49	9457.56	5944.93	6776.36	8521.29	5140.52	-0.13321	0.640887	0.860466	7381.02	6595.78
ATP6V0E1	9544.72	14930.9	9923.15	11775.3	13675.8	10341.4	-0.0880875	0.569426	0.825574	12237.8	11428.9
ATP6V0E2	94.5733	132.297	267.574	69.6766	62.1175	80.9435	-0.308449	0.46682	0.762208	113.435	120.078
ATP6V0E2-AS1	28.7311	5.08835	20.8229	8.86793	17.3929	13.2892	-0.0974718	0.849702	0.952814	16.9097	15.0932
ATP6V1A	12126.9	14023.5	9312	9597.63	10038.2	9480.06	-0.444625	0.0952068	0.393957	13075.2	9606.97
ATP6V1B1	9.57705	0	0	3.80054	4.9694	4.83245	-0.806839	0.594154	NA	4.78852	3.4006
ATP6V1B1-AS1	0	1.69612	3.12343	3.80054	2.4847	1.20811	1.95284	0.32789	NA	0.848059	2.6542
ATP6V1B2	32301	22090.2	17766.1	19419.5	23633.2	18002.1	-0.472328	0.0588898	0.320985	27195.6	19705.2
ATP6V1C1	6193.96	8857.13	3776.23	5757.82	8685.28	7381.57	-0.262098	0.30331	0.64308	7525.54	6400.22
ATP6V1C2	29.9283	47.4913	42.6869	44.3396	43.4823	39.8677	0.160676	0.67562	0.877978	38.7098	42.5941
ATP6V1D	1243.82	2003.12	1260.83	1612.7	1446.1	1504.1	-0.135652	0.390036	0.710335	1623.47	1455.93
ATP6V1E1	5967.7	6379.1	5314	6890.38	6210.51	5455.84	-0.0679638	0.629249	0.855138	6173.4	5967.68
ATP6V1E2	94.5733	115.336	129.102	79.8114	67.087	140.141	-0.0554052	0.880577	0.963636	104.955	104.035
ATP6V1F	906.228	1234.77	1129.64	1691.24	1352.92	1164.62	0.303048	0.184288	0.524779	1070.5	1334.61
ATP6V1G1	5112.95	5408.92	5338.99	6626.88	6309.9	5116.36	0.145336	0.415604	0.728363	5260.93	5848.03
ATP6V1G2	37.1111	37.3146	49.9749	67.1429	40.9976	25.3704	0.303869	0.535195	0.804706	37.2128	45.8714
ATP6V1H	616.522	725.939	712.143	782.911	895.735	769.568	0.231066	0.0569007	0.314522	671.231	790.089
ATP7A	2408.63	2647.64	1327.46	1830.59	2064.79	2125.07	-0.482892	0.0143083	0.16099	2528.13	1836.98
ATP7B	225.061	393.499	122.855	108.949	245.985	206.587	-0.833839	0.038936	0.264928	309.28	171.094
ATP8A1	4195.94	2455.98	4089.62	3284.93	4469.98	3009.41	0.185683	0.438662	0.744236	3325.96	3713.48
ATP8A2	11.9713	5.08835	10.4114	2.53369	1.24235	6.04056	-0.79324	0.301594	NA	8.52983	5.05701
ATP8B1	135.276	83.1098	128.061	103.881	142.87	112.354	0.178587	0.498665	0.783744	109.193	121.792
ATP8B2	2509.19	1351.81	3232.75	1109.76	911.886	2523.75	-0.0477595	0.855717	0.9554	1930.5	1944.54
ATP8B3	94.5733	91.5904	70.7978	153.288	236.047	80.9435	0.366052	0.370253	0.695407	93.0819	135.269
ATP8B4	1357.55	1662.2	2121.85	1506.28	2454.89	1218.99	0.292458	0.45531	0.755796	1509.87	1825.5
ATP8B5P	2.39426	0	0	2.53369	4.9694	2.41623	-0.0172594	0.991292	NA	1.19713	2.47983
ATP9A	385.476	2282.98	579.917	489.003	518.06	503.783	-1.19872	0.0465198	0.286403	1334.23	522.691
ATP9B	433.361	515.62	381.059	525.742	499.425	469.956	-0.028814	0.870764	0.960218	474.491	469.045
ATPAF1	590.186	578.376	754.83	553.612	544.15	647.548	0.096473	0.533967	0.80397	584.281	625.035
ATPAF2	306.466	167.916	217.599	309.111	275.802	266.993	0.158217	0.520977	0.796816	237.191	267.376
ATPIF1	962.493	1043.11	914.125	554.879	701.928	704.33	-0.490482	0.0157009	0.168202	1002.8	718.815
ATR	1637.68	1124.53	1574.21	1434.07	1513.18	1618.87	0.17404	0.252305	0.596938	1381.1	1535.08
ATRAID	919.397	827.706	1051.56	1118.63	915.613	1038.98	0.236201	0.0949803	0.393851	873.551	1031.19
ATRIP	380.688	374.842	336.29	307.844	490.729	306.861	-0.068484	0.739791	0.909192	377.765	360.431
ATRN	994.816	734.419	902.672	943.801	916.855	1042.6	0.14707	0.301289	0.640509	864.617	951.482
ATRNL1	0	0	0	0	0	1.20811	0.47549	0.866576	NA	0	0.302028
ATRX	6446.55	7486.67	5699.22	6059.33	7018.04	6607.17	-0.13761	0.303175	0.643014	6966.61	6345.94
ATXN1	5989.25	7730.91	4337.41	7017.07	7459.07	6007.94	-0.184115	0.168182	0.504571	6860.08	6205.37
ATXN10	1000.8	549.542	1045.31	1021.08	785.166	896.42	0.300254	0.0938329	0.392052	775.172	936.993
ATXN1L	7392.28	13843.7	7569.12	8693.1	9208.31	9262.6	-0.236786	0.086625	0.379884	10618	8683.28
ATXN2	780.529	995.621	696.526	808.248	766.531	695.873	-0.25864	0.0398212	0.267203	888.075	741.794
ATXN2L	3198.73	4822.06	3480.55	5086.39	4547	3798.31	0.0837855	0.624303	0.85347	4010.4	4228.06
ATXN3	2968.88	3339.66	3201.52	3743.53	3474.86	2711	0.0596598	0.755959	0.914499	3154.27	3282.73
ATXN3L	0	1.69612	0	0	1.24235	1.20811	-0.168456	0.948476	NA	0.848059	0.612616
ATXN7	10081	14089.7	7832.53	16361.3	19072.6	15965.2	0.241721	0.21413	0.558869	12085.3	14807.9
ATXN7L1	1664.01	1697.81	1304.55	1973.75	1534.3	1942.65	-0.00802754	0.960947	0.989489	1680.91	1688.81
ATXN7L2	92.1791	162.827	203.023	177.359	132.932	210.212	0.543845	0.0686394	0.343726	127.503	180.881
ATXN7L3	4648.46	9820.52	4412.37	5159.87	6103.67	4306.92	-0.479141	0.00420964	0.0882194	7234.49	4995.71
ATXN7L3B	2661.22	2954.64	4406.12	2391.81	3040.03	3347.68	0.203289	0.142665	0.466114	2807.93	3296.41
AUH	584.2	659.79	457.062	515.607	393.825	509.824	-0.400186	0.0704323	0.347671	621.995	469.079
AUNIP	23.9426	15.2651	40.6046	31.6712	26.0894	68.8624	1.07849	0.0329929	0.243808	19.6038	41.8069
AUP1	4831.62	4508.28	5117.22	5487.98	4096.03	5268.58	0.0943603	0.556665	0.817946	4669.95	4992.45
AURKA	79.0106	81.4137	80.1681	79.8114	94.4187	165.511	0.386972	0.295299	0.635238	80.2122	104.977
AURKAIP1	244.215	432.51	396.676	562.48	499.425	370.891	0.458347	0.155774	0.487247	338.362	457.368
AURKAPS1	112.53	215.407	183.241	159.623	212.442	212.628	0.265737	0.297874	0.637383	163.969	191.983
AURKB	181.964	150.955	222.805	239.434	183.868	303.236	0.498921	0.140087	0.462274	166.459	237.336
AURKC	69.4336	39.0107	90.5796	48.1402	47.2093	79.7354	0.271555	0.47922	0.770925	54.2222	66.4161
AUTS2	377.096	620.779	447.692	88.6793	149.082	253.704	-1.39186	0.00253085	0.0674082	498.938	234.789
AVEN	125.699	91.5904	140.554	92.4798	77.0258	151.014	0.0817035	0.744865	0.910898	108.645	115.269
AVIL	1551.48	2116.76	1731.42	1545.55	1652.33	1790.42	-0.116759	0.788824	0.928371	1834.12	1679.93
AVL9	6219.1	6295.99	4690.36	5880.7	6703.73	6428.37	-0.0984439	0.535821	0.805152	6257.54	5925.79
AVPI1	51.4766	30.5301	22.9052	40.5391	34.7858	31.4109	-0.384477	0.444773	0.749245	41.0034	32.4103
AVPR1A	55.068	27.1379	64.551	60.8087	23.6047	39.8677	0.249924	0.605211	0.845918	41.103	47.208
AVPR1B	7.18279	1.69612	0	0	7.45411	4.83245	-0.82784	0.640054	NA	4.43945	3.07164
AVPR2	28.7311	47.4913	24.9875	39.2723	50.9364	14.4974	-0.251076	0.683731	0.881275	38.1112	32.4234
AWAT1	2.39426	0	3.12343	1.26685	0	0	-0.207517	0.914161	NA	1.19713	1.09757
AXDND1	3.59139	16.9612	6.24687	2.53369	4.9694	8.45679	-0.818165	0.323899	NA	10.2763	5.55169
AXIN1	532.723	888.766	882.89	776.577	954.126	700.705	0.231627	0.356476	0.685605	710.745	828.575
AXIN2	177.175	96.6787	310.261	59.5418	36.0282	86.9841	-0.45072	0.271095	0.613557	136.927	123.204
AXL	7.18279	10.1767	11.4526	26.6038	24.847	28.9947	1.37893	0.0782799	0.3637	8.67975	22.9745
AZI2	2675.59	3968.92	2187.44	2934.02	4190.45	4074.96	-0.00074075	0.997443	0.999315	3322.25	3346.72
AZIN1	9739.86	16165.7	8415.57	8838.79	9497.77	9457.11	-0.481724	0.0130403	0.154652	12952.8	9052.31
AZIN1-AS1	7.18279	22.0495	14.576	7.60108	19.8776	8.45679	-0.117084	0.852888	NA	14.6162	12.6279
AZIN2	22.7455	35.6185	38.5223	24.0701	27.3317	22.9541	-0.0900876	0.863336	0.95799	29.182	28.2196
AZU1	31.1254	76.3253	142.637	96.2804	245.985	21.746	1.48488	0.141068	0.463434	53.7254	126.662
B2M	773066	1.03599e+06	760548	1.01213e+06	978341	751308	-0.0513949	0.715469	0.897837	904530	875581
B3GALNT1	58.6594	71.237	40.6046	25.3369	22.3623	62.8219	-0.837731	0.0995727	0.402112	64.9482	37.7814
B3GALNT2	508.781	337.528	518.49	231.833	441.035	386.596	-0.0772245	0.771458	0.919734	423.154	394.488
B3GALT2	1.19713	15.2651	11.4526	11.4016	16.1506	4.83245	0.467649	0.61296	0.848512	8.2311	10.9593
B3GALT4	68.2365	122.121	119.732	177.359	180.141	105.106	0.608651	0.0178179	0.177662	95.1785	145.584
B3GALT6	71.8279	72.9331	120.773	120.35	75.7834	89.4003	0.489813	0.0953373	0.394388	72.3805	101.577
B3GAT1	84.9963	186.573	282.15	21.5364	14.9082	115.979	-1.20318	0.0965714	0.397403	135.785	108.643
B3GAT3	354.351	296.821	380.018	338.248	290.71	247.663	-0.0446623	0.838634	0.948446	325.586	314.16
B3GLCT	214.286	188.269	267.574	206.496	132.932	205.379	0.00856127	0.973608	0.992451	201.278	203.095
B3GNT2	5794.11	3834.92	2520.61	3259.6	2607.69	2889.81	-0.823995	0.00177056	0.0549179	4814.52	2819.43
B3GNT3	0	0	1.04114	6.33424	1.24235	2.41623	3.351	0.082778	NA	0	2.75849
B3GNT4	5.98565	3.39224	5.20572	7.60108	11.1812	6.04056	0.524315	0.53881	NA	4.68895	7.50713
B3GNT5	5212.31	10919.6	5001.66	6341.84	10022	14757.1	0.2238	0.628631	0.854905	8065.96	9030.66
B3GNT7	8.37992	66.1486	106.197	5.06739	34.7858	60.4056	-0.159063	0.861423	0.956909	37.2643	51.6139
B3GNT8	93.3762	262.898	96.8264	130.485	320.527	114.771	-0.0567461	0.902723	0.971794	178.137	165.652
B3GNT9	44.2938	40.7068	26.0286	39.2723	49.694	31.4109	-0.33411	0.414683	0.72775	42.5003	36.6015
B3GNTL1	514.766	1051.59	567.424	619.488	474.578	445.794	-0.521152	0.177322	0.51739	783.18	526.821
B4GALNT3	37.1111	223.888	154.089	111.483	68.3293	95.4409	-0.273711	0.711331	0.896021	130.499	107.336
B4GALNT4	3.59139	3.39224	7.28801	0	3.72705	0	-0.541557	0.706043	NA	3.49181	2.75377
B4GALT1	12286.2	14315.2	9594.15	9895.34	10174.9	11664.3	-0.362863	0.0206007	0.191785	13300.7	10332.2
B4GALT1-AS1	88.5877	101.767	74.9624	73.4771	22.3623	57.9894	-0.718425	0.0836834	0.374035	95.1774	57.1978
B4GALT2	45.491	25.4418	31.2343	30.4043	22.3623	70.0705	0.0907534	0.875898	0.961726	35.4664	38.5179
B4GALT3	1301.28	1658.8	1566.92	1502.48	1135.51	1800.09	0.0368855	0.883811	0.964422	1480.04	1501.25
B4GALT4	2104.56	2228.7	1321.21	928.599	1661.02	1757.8	-0.611368	0.104433	0.409607	2166.63	1417.16
B4GALT4-AS1	46.6881	37.3146	15.6172	5.06739	24.847	21.746	-1.35939	0.0438004	0.278361	42.0014	16.8194
B4GALT5	14480.5	32395.9	21426.8	20427.9	39030.9	19569	0.19486	0.567808	0.824268	23438.2	25113.7
B4GALT6	204.709	242.545	309.22	121.617	144.113	181.217	-0.359469	0.271692	0.613877	223.627	189.042
B4GALT7	80.2078	89.8943	90.5796	84.8788	121.75	130.476	0.346512	0.306176	0.646486	85.051	106.921
B4GAT1	19.1541	16.9612	33.3166	16.469	14.9082	27.7866	0.378481	0.381656	0.703739	18.0576	23.1201
B9D1	26.3369	10.1767	6.24687	8.86793	16.1506	28.9947	-0.160914	0.8425	NA	18.2568	15.065
B9D2	71.8279	157.739	98.9087	195.094	94.4187	131.684	0.23411	0.451025	0.753253	114.783	130.027
BAALC	8.37992	22.0495	10.4114	11.4016	8.69646	19.3298	-0.226584	0.719197	0.900139	15.2147	12.4598
BAALC-AS1	0	3.39224	0	0	2.4847	0	-1.01449	0.702925	NA	1.69612	0.621175
BAAT	1.19713	3.39224	3.12343	1.26685	0	4.83245	-0.026637	0.983305	NA	2.29468	2.30568
BABAM1	837.992	819.225	1219.18	1189.57	1079.6	994.277	0.438556	0.015885	0.169296	828.608	1120.66
BACE1	569.834	201.838	432.075	421.86	352.828	402.301	0.178463	0.367177	0.694478	385.836	402.266
BACE1-AS	39.5053	20.3534	23.9463	13.9353	14.9082	20.5379	-0.669889	0.108323	0.416079	29.9294	18.3319
BACE2	107.742	23.7457	72.8801	13.9353	268.348	76.1111	0.795962	0.312024	0.651786	65.7437	107.819
BACH1	17403.9	17648.1	15562	29284.4	31242.6	22257.1	0.402581	0.130831	0.450345	17526	24586.5
BACH1-IT2	108.939	213.711	70.7978	144.421	161.506	137.725	-0.340933	0.218518	0.563627	161.325	128.612
BACH2	1204.31	471.521	1338.91	254.636	1462.25	357.601	0.100503	0.850795	0.953181	837.917	853.349
BAD	40.7025	72.9331	80.1681	81.0782	84.4799	51.9488	0.414106	0.321349	0.659446	56.8178	74.4188
BAG1	1964.49	2347.43	2156.21	3262.13	2135.6	2154.06	0.160989	0.4075	0.723326	2155.96	2427
BAG2	64.6451	49.1874	112.444	65.876	63.3599	78.5273	0.489652	0.0888123	0.382547	56.9162	80.0517
BAG3	220.272	78.0214	197.817	179.892	149.082	118.395	0.208463	0.595646	0.841461	149.147	161.297
BAG4	1881.89	1156.75	1212.93	1450.54	1587.72	1284.22	-0.183503	0.40964	0.724961	1519.32	1383.86
BAG5	2458.91	2818.95	3194.23	2916.28	2400.22	3072.23	0.136636	0.313542	0.652863	2638.93	2895.74
BAG6	5254.21	7457.83	5463.93	7270.44	6335.99	5575.44	-0.0401431	0.732731	0.905956	6356.02	6161.45
BAHCC1	58.6594	45.7952	63.5098	81.0782	85.7222	60.4056	0.472052	0.161542	0.494927	52.2273	72.679
BAHD1	784.121	805.656	1047.39	838.653	798.832	750.238	0.101705	0.598473	0.843497	794.888	858.778
BAIAP2	220.272	435.902	240.504	145.687	207.473	189.674	-0.746461	0.0740945	0.355416	328.087	195.835
BAIAP2-AS1	474.064	220.495	425.828	228.032	218.654	314.109	-0.16226	0.67549	0.877978	347.28	296.656
BAIAP2L1	527.935	383.323	244.669	428.194	622.418	361.226	-0.282645	0.400491	0.718588	455.629	414.127
BAIAP2L2	41.8996	30.5301	39.5635	34.2049	29.8164	28.9947	-0.103861	0.832978	0.946906	36.2149	33.1449
BAIAP3	666.802	683.536	950.565	306.577	229.835	349.145	-0.719112	0.0883029	0.381994	675.169	459.03
BAK1	2727.06	1645.23	1746	2399.41	3263.66	2603.48	0.178281	0.555553	0.817276	2186.15	2503.14
BAMBI	35.9139	42.403	58.3041	63.3424	258.409	149.806	1.72004	0.0280142	0.22625	39.1584	132.465
BANF1	657.225	656.398	1009.91	1130.03	749.138	1028.1	0.5639	0.00592512	0.103686	656.811	979.295
BANK1	2071.04	373.146	979.717	326.847	2613.91	805.811	0.243318	0.715412	0.897837	1222.09	1181.57
BANP	847.569	1187.28	758.994	723.37	781.439	653.589	-0.464384	0.00801607	0.122345	1017.43	729.348
BAP1	2349.97	5690.48	3161.96	3906.96	3869.92	3363.39	-0.0918439	0.695576	0.888316	4020.22	3575.56
BARD1	389.068	266.291	409.17	312.911	437.308	497.742	0.330373	0.12836	0.446568	327.679	414.283
BARX2	0	0	4.16458	0	1.24235	0	2.0017	0.411099	NA	0	1.35173
BASP1	17952.2	41032.5	16543.8	28848.6	25983.8	16623.6	-0.333525	0.323145	0.660469	29492.3	22000
BATF	274.143	407.068	224.887	776.577	757.834	409.55	0.539879	0.310911	0.650795	340.606	542.212
BATF2	239.426	278.163	520.572	2185.31	3287.26	1145.29	2.50385	0.000360719	0.023955	258.795	1784.61
BATF3	10.7742	45.7952	22.9052	36.7386	16.1506	15.7055	-0.217977	0.788372	0.928205	28.2847	22.8749
BAX	1070.24	1273.78	1304.55	1678.57	1226.2	1030.52	0.154812	0.468684	0.763295	1172.01	1309.96
BAZ1A	14795.3	22526.1	17345.5	20667.3	30369.3	18374.2	0.214741	0.29594	0.635605	18660.7	21689.1
BAZ1B	2683.97	1877.6	2750.7	2515.96	2755.53	2985.25	0.295267	0.0319434	0.240308	2280.79	2751.86
BAZ2A	23553.6	29939.9	18347	28531.9	34875.3	24035.4	-0.054053	0.686203	0.883063	26746.7	26447.4
BAZ2B	12973.3	15141.2	11383.9	12487.3	17077.4	12133.1	-0.0990614	0.755586	0.914464	14057.3	13270.4
BBC3	122.107	108.552	104.114	186.227	57.1481	48.3245	-0.260317	0.631398	0.856189	115.329	98.9534
BBIP1	1415.01	2014.99	1238.96	1771.05	1552.94	1250.4	-0.237775	0.131764	0.451652	1715	1453.34
BBS1	293.297	220.495	290.479	315.445	359.039	236.79	0.228905	0.276531	0.619038	256.896	300.438
BBS10	743.418	459.648	451.857	540.944	657.204	669.294	-0.0251194	0.927236	0.978651	601.533	579.825
BBS12	34.7168	32.2262	27.0698	24.0701	42.2399	32.619	-0.0770898	0.84889	0.951983	33.4715	31.4997
BBS2	1285.72	1083.82	1285.81	1074.29	949.156	662.046	-0.245291	0.352171	0.682277	1184.77	992.825
BBS4	1239.03	1046.5	712.143	1251.64	1042.33	1013.61	-0.240084	0.268744	0.611664	1142.77	1004.93
BBS5	29.9283	32.2262	38.5223	13.9353	24.847	14.4974	-0.460386	0.280604	0.62408	31.0773	22.9505
BBS7	369.913	254.418	350.866	267.305	331.708	309.277	0.0343383	0.860341	0.956532	312.166	314.789
BBS9	532.723	271.379	364.401	401.591	413.703	316.526	-0.0861099	0.680047	0.879403	402.051	374.055
BBX	3994.83	3405.81	3346.24	4141.32	4595.46	4233.23	0.134782	0.477721	0.770162	3700.32	4079.06
BCAP29	1015.17	888.766	1045.31	1241.51	1114.39	1002.73	0.201454	0.262169	0.606059	951.966	1100.99
BCAP31	4527.55	8187.16	4431.11	5112.99	4471.22	3737.9	-0.480298	0.0173206	0.175699	6357.36	4438.31
BCAR3	26.3369	16.9612	18.7406	10.1348	22.3623	33.8272	-0.0230148	0.967434	0.99125	21.649	21.2662
BCAR4	0	1.69612	0	1.26685	0	2.41623	0.292425	0.891754	NA	0.848059	0.920768
BCAS1	29.9283	61.0603	34.3578	36.7386	27.3317	72.4868	-0.0670667	0.899749	0.970689	45.4943	42.7287
BCAS2	1149.25	1596.05	1452.4	1341.59	1393.92	1454.57	0.0531572	0.765787	0.917005	1372.65	1410.62
BCAS3	1349.17	1736.83	1209.81	1402.4	1427.46	1250.4	-0.221493	0.202488	0.546033	1543	1322.52
BCAS4	37.1111	28.834	97.8676	5.06739	33.5435	20.5379	-0.0539946	0.911588	0.973767	32.9725	39.2541
BCAT1	2062.66	4735.56	638.222	951.402	1685.87	819.1	-1.70585	0.0162277	0.170192	3399.11	1023.65
BCAT2	92.1791	54.2758	104.114	87.4124	86.9646	100.273	0.388185	0.145389	0.470109	73.2274	94.6912
BCCIP	778.135	600.426	901.631	974.205	747.895	1075.22	0.430742	0.0184503	0.181133	689.28	924.738
BCDIN3D	112.53	78.0214	77.0447	130.485	130.447	93.0247	0.156386	0.629859	0.855266	95.2759	107.75
BCDIN3D-AS1	17.957	13.5689	23.9463	13.9353	12.4235	14.4974	0.0300116	0.94595	0.985487	15.763	16.2006
BCKDHA	584.2	792.087	397.717	805.715	771.5	591.975	-0.152235	0.636392	0.859374	688.144	641.727
BCKDHB	175.978	115.336	208.229	64.6092	74.5411	131.684	-0.339307	0.176869	0.516747	145.657	119.766
BCKDK	826.02	1353.5	940.153	1208.57	975.245	1198.45	-0.00962073	0.974366	0.99276	1089.76	1080.6
BCL10	1589.79	3288.77	1714.76	2813.67	2753.05	2898.26	0.108075	0.648328	0.864554	2439.28	2544.94
BCL11A	644.056	103.463	369.606	305.31	521.787	283.906	0.128032	0.783303	0.925396	373.76	370.153
BCL11B	3410.63	2113.36	5398.33	1368.19	826.163	1296.3	-0.561165	0.162635	0.495937	2761.99	2222.25
BCL2	2122.51	1058.38	2499.79	901.995	1247.32	1035.35	-0.168861	0.416516	0.728757	1590.45	1421.11
BCL2A1	39789	80389.2	29541.4	46492	63899.1	48341.4	-0.328633	0.3399	0.67451	60089.1	47068.5
BCL2L1	933.762	1294.14	1127.56	1641.83	877.1	1036.56	0.0693857	0.819527	0.941879	1113.95	1170.76
BCL2L10	7.18279	3.39224	4.16458	6.33424	7.45411	1.20811	-0.129355	0.914767	NA	5.28751	4.79026
BCL2L11	4775.36	3387.15	3418.08	5463.91	6665.21	4407.19	0.194612	0.409635	0.724961	4081.25	4988.6
BCL2L12	1027.14	834.49	974.511	929.866	995.123	838.43	0.00816756	0.957607	0.988221	930.814	934.483
BCL2L13	1945.34	1465.45	1728.3	2210.65	1885.89	1485.98	0.0864593	0.578	0.83147	1705.39	1827.7
BCL2L14	5.98565	0	13.5349	6.33424	14.9082	14.4974	1.87659	0.0525404	NA	2.99283	12.3187
BCL2L15	216.681	205.23	434.157	200.162	391.341	119.603	0.457029	0.455469	0.755796	210.956	286.316
BCL2L2	984.042	776.822	967.223	1298.52	1027.42	1088.51	0.302604	0.0614222	0.32895	880.432	1095.42
BCL3	2395.46	10030.8	2742.37	8604.43	7337.32	4689.89	0.0705802	0.844873	0.950222	6213.15	5843.5
BCL6	77601.6	122967	67001.8	135936	173738	71572.2	0.039369	0.896141	0.968545	100284	112062
BCL6B	3.59139	1.69612	1.04114	2.53369	4.9694	2.41623	0.276893	0.844182	NA	2.64376	2.74012
BCL7A	181.964	22.0495	93.703	15.2022	229.835	76.1111	0.497036	0.598452	0.843497	102.007	103.713
BCL7B	671.59	1594.35	1160.88	1706.44	1202.6	1206.9	0.273433	0.294265	0.63467	1132.97	1319.2
BCL7C	17.957	11.8728	12.4937	12.6685	14.9082	14.4974	-0.143414	0.810972	0.93789	14.9149	13.6419
BCL9	396.25	681.84	373.771	499.138	432.338	526.737	-0.208525	0.309815	0.649629	539.045	457.996
BCL9L	638.071	520.708	1343.08	639.758	526.757	559.356	0.328867	0.304024	0.643638	579.39	767.237
BCLAF1	16743.1	39896.1	22710.5	25758.8	23258.1	25301.5	-0.133398	0.52841	0.800436	28319.6	24257.2
BCO2	155.627	101.767	82.2504	84.8788	132.932	88.1922	-0.41475	0.174657	0.512817	128.697	97.0632
BCOR	996.013	359.577	846.45	918.464	1376.52	649.965	0.597308	0.10233	0.406112	677.795	947.851
BCORL1	627.297	1314.49	673.62	890.593	1128.05	589.559	-0.205693	0.418358	0.729958	970.894	820.457
BCORP1	0	0	0	92.4798	0	118.395	22.1808	5.04273e-05	0.00783477	0	52.7187
BCR	780.529	1724.95	1866.77	937.467	1010.03	962.866	-0.102191	0.772621	0.920185	1252.74	1194.28
BCRP3	15.5627	10.1767	7.28801	3.80054	4.9694	4.83245	-1.28049	0.133302	NA	12.8697	5.2226
BCS1L	367.519	212.015	355.03	277.44	268.348	333.439	0.128507	0.472456	0.766236	289.767	308.564
BDH1	180.767	105.159	269.656	146.954	171.444	120.811	0.327647	0.265172	0.608823	142.963	177.217
BDH2	250.2	174.7	318.59	235.634	263.378	171.552	0.236417	0.375807	0.699727	212.45	247.289
BDKRB2	10.7742	0	5.20572	1.26685	0	1.20811	-1.31544	0.67757	NA	5.38709	1.92017
BDNF	7.18279	3.39224	4.16458	7.60108	3.72705	9.6649	0.342994	0.724231	NA	5.28751	6.2894
BDNF-AS	23.9426	18.6573	18.7406	10.1348	16.1506	7.24868	-0.692761	0.156277	0.487868	21.3	13.0687
BDP1	3044.3	2216.83	2628.89	2110.57	2500.85	2744.83	-0.0539948	0.685912	0.882916	2630.57	2496.29
BEAN1	258.58	432.51	163.46	368.652	299.407	269.409	-0.374447	0.464295	0.76044	345.545	275.232
BEAN1-AS1	197.527	240.849	100.991	195.094	144.113	160.679	-0.622972	0.18457	0.525203	219.188	150.219
BECN1	2294.9	2778.24	2245.75	3449.62	3371.74	3052.9	0.231189	0.0165998	0.171741	2536.57	3030
BEGAIN	26.3369	49.1874	29.152	38.0054	42.2399	22.9541	-0.188281	0.739957	0.909246	37.7622	33.0879
BEND2	620.114	883.678	844.368	434.529	70.814	461.499	-0.830439	0.162236	0.495464	751.896	452.802
BEND3	34.7168	20.3534	39.5635	11.4016	11.1812	45.9083	-0.0551683	0.919818	0.975902	27.5351	27.0136
BEND3P3	360.336	315.478	102.032	483.936	505.637	382.972	-0.0828521	0.873252	0.960729	337.907	368.644
BEND4	245.412	33.9224	88.4973	22.8032	300.649	74.903	-0.239722	0.752037	0.912808	139.667	121.713
BEND5	44.2938	13.5689	39.5635	5.06739	7.45411	30.2028	-0.568187	0.263924	0.607823	28.9314	20.5719
BEND6	0	0	0	0	1.24235	0	0.503399	0.820035	NA	0	0.310588
BEND7	743.418	1545.16	499.749	461.132	746.653	341.896	-1.11007	0.0633944	0.332248	1144.29	512.358
BEST1	4098.98	5663.34	2733	3545.9	4496.07	4360.08	-0.376387	0.296117	0.635605	4881.16	3783.76
BEST2	3.59139	8.48059	6.24687	5.06739	11.1812	4.83245	0.221355	0.832402	NA	6.03599	6.83197
BEST3	8.37992	10.1767	2.08229	5.06739	0	8.45679	-1.23952	0.26288	NA	9.27831	3.90162
BEST4	19.1541	28.834	23.9463	26.6038	23.6047	2.41623	-0.302844	0.620601	0.852855	23.9941	19.1428
BET1	270.552	162.827	215.517	263.504	113.054	369.682	0.18376	0.611884	0.847835	216.689	240.439
BET1L	2224.27	1479.02	1968.8	1553.15	1552.94	1479.94	-0.159262	0.553733	0.816206	1851.64	1638.71
BEX1	10.7742	81.4137	43.7281	83.6119	62.1175	7.24868	0.298549	0.768472	0.918503	46.0939	49.1765
BEX2	63.4479	118.728	174.912	51.9407	83.2375	45.9083	-0.151721	0.709709	0.895536	91.0881	88.9997
BEX4	556.666	385.019	958.894	922.265	568.997	414.383	0.610711	0.0626679	0.331124	470.842	716.135
BEX5	22.7455	30.5301	32.2755	22.8032	11.1812	10.873	-0.5065	0.446022	0.750054	26.6378	19.2832
BFAR	1048.69	1148.27	1033.86	1265.58	1010.03	1292.68	0.0617885	0.710516	0.895986	1098.48	1150.54
BFSP1	43.0967	42.403	22.9052	15.2022	11.1812	10.873	-1.51672	0.0148155	0.163948	42.7498	15.0404
BFSP2	16.7598	0	8.32916	1.26685	4.9694	6.04056	-0.724709	0.438499	NA	8.37992	5.15149
BGLAP	5.98565	5.08835	0	2.53369	4.9694	0	-1.87904	0.173217	NA	5.537	1.87577
BHLHB9	58.6594	62.7564	119.732	36.7386	60.8752	42.2839	0.0275912	0.945678	0.985487	60.7079	64.9073
BHLHE40	2861.14	2786.72	4260.36	4644.26	1807.62	1562.09	0.127474	0.757784	0.914772	2823.93	3068.58
BHLHE40-AS1	5.98565	18.6573	30.1932	13.9353	11.1812	6.04056	0.306247	0.652466	0.866283	12.3215	15.3376
BHLHE41	144.853	15.2651	15.6172	20.2696	44.7246	136.517	0.0121771	0.991122	0.997474	80.059	54.282
BHMT	2.39426	0	1.04114	0	1.24235	1.20811	-0.56976	0.779659	NA	1.19713	0.872902
BHMT2	7.18279	5.08835	4.16458	5.06739	1.24235	1.20811	-1.07653	0.460164	NA	6.13557	2.92061
BICC1	1.19713	3.39224	2.08229	3.80054	12.4235	2.41623	1.12326	0.411885	NA	2.29468	5.18064
BICD1	187.95	133.993	130.143	100.081	124.235	142.557	-0.379076	0.130227	0.449908	160.971	124.254
BICD2	3924.2	4116.48	4003.2	4705.07	3924.59	3447.95	-0.00863466	0.96832	0.991342	4020.34	4020.2
BID	2044.7	2628.98	2380.06	4090.65	2430.04	1651.49	0.15396	0.610355	0.847814	2336.84	2638.06
BIK	37.1111	40.7068	36.4401	62.0755	52.1787	51.9488	0.339206	0.400509	0.718588	38.9089	50.6608
BIN1	330.408	315.478	704.855	260.97	264.621	298.404	0.118831	0.674644	0.877842	322.943	382.212
BIN2	34904.7	51723.1	34481.7	40593.6	39163.9	33498.5	-0.21407	0.204664	0.547261	43313.9	36934.4
BIN3	1116.92	2213.43	1319.13	2510.89	2135.6	1585.04	0.19584	0.204728	0.547261	1665.18	1887.67
BIN3-IT1	28.7311	44.0991	18.7406	43.0728	40.9976	30.2028	-0.188193	0.703668	0.892525	36.4151	33.2534
BIRC2	4865.14	5505.6	4459.22	6202.48	7582.07	6836.71	0.250279	0.268172	0.611014	5185.37	6270.12
BIRC3	6878.71	3655.13	5131.8	4934.37	7312.48	4404.78	0.100796	0.781725	0.924777	5266.92	5445.86
BIRC5	100.559	76.3253	175.953	121.617	96.9034	337.063	1.05746	0.113644	0.425541	88.4422	182.884
BIRC6	6419.02	6723.41	5994.91	5588.06	8111.31	6180.7	-0.0246449	0.888107	0.965605	6571.21	6468.75
BIRC6-AS2	38.3082	25.4418	22.9052	24.0701	26.0894	16.9136	-0.504699	0.233855	0.579191	31.875	22.4946
BISPR	533.92	456.256	744.418	1801.46	2013.85	1336.17	1.49953	3.7201e-05	0.00638916	495.088	1473.97
BIVM	193.935	191.661	241.546	78.5445	106.842	106.314	-0.620073	0.0442079	0.278833	192.798	133.312
BLACAT1	4.78852	1.69612	8.32916	0	1.24235	0	-0.800243	0.54551	NA	3.24232	2.39288
BLACE	2.39426	0	0	2.53369	1.24235	2.41623	0.610105	0.822234	NA	1.19713	1.54807
BLCAP	1857.95	1899.65	1929.24	2070.03	1694.57	1825.46	-0.00178739	0.986825	0.995813	1878.8	1879.82
BLK	1326.42	167.916	414.375	121.617	2232.5	337.063	0.391067	0.699178	0.89018	747.168	776.39
BLM	387.87	188.269	259.245	165.957	182.626	397.469	-0.1395	0.70794	0.895018	288.07	251.324
BLMH	691.942	542.758	776.694	529.542	485.759	913.333	0.131724	0.560139	0.819932	617.35	676.332
BLNK	720.673	67.8447	170.748	116.55	612.479	440.961	0.224769	0.753814	0.913582	394.259	335.184
BLOC1S1	186.752	296.821	179.077	283.774	247.228	215.044	-0.0652258	0.730931	0.904928	241.787	231.281
BLOC1S2	3591.39	6129.77	3908.46	5539.92	4775.6	4356.45	-0.0383864	0.773609	0.92056	4860.58	4645.11
BLOC1S3	937.354	900.639	873.52	833.585	918.097	942.328	-0.0494712	0.742679	0.910378	918.996	891.883
BLOC1S4	159.218	164.523	275.903	177.359	135.416	161.887	0.196552	0.356531	0.685622	161.871	187.641
BLOC1S6	2988.04	4669.41	3736.67	4917.9	4788.02	4807.08	0.26606	0.236453	0.581289	3828.73	4562.42
BLVRA	739.827	758.165	874.561	2087.76	2043.67	1161	0.939323	0.00729872	0.116907	748.996	1541.75
BLVRB	301.677	247.633	258.204	471.267	493.213	314.109	0.431874	0.203405	0.546044	274.655	384.198
BLZF1	830.809	1155.06	827.71	1223.77	1264.71	1281.81	0.204292	0.404242	0.720957	992.933	1149.5
BMF	2760.58	1484.1	1199.4	2480.49	2008.88	1432.82	-0.347584	0.319142	0.657468	2122.34	1780.4
BMI1	1.19713	0	3.12343	1.26685	1.24235	1.20811	1.29019	0.563504	NA	0.598565	1.71019
BMP1	41.8996	78.0214	61.4275	97.5472	62.1175	85.776	0.373058	0.421055	0.732278	59.9605	76.7171
BMP10	15.5627	11.8728	3.12343	19.0027	9.93881	9.6649	-0.674617	0.353703	NA	13.7178	10.4325
BMP2	4.78852	23.7457	157.213	32.938	39.7552	19.3298	2.02759	0.0888313	0.382547	14.2671	62.309
BMP2K	2314.05	2444.11	1397.22	2039.62	2442.46	2141.98	-0.287202	0.253173	0.597592	2379.08	2005.32
BMP3	22.7455	5.08835	4.16458	0	0	4.83245	-2.66519	0.0328429	NA	13.9169	2.24926
BMP6	217.878	396.892	378.977	239.434	91.934	254.912	-0.414843	0.412806	0.726775	307.385	241.314
BMP8A	392.659	59.3641	307.138	212.83	231.077	304.444	0.539948	0.299957	0.639183	226.012	263.872
BMP8B	101.756	52.5797	74.9624	34.2049	59.6328	141.349	0.047328	0.901907	0.971382	77.1679	77.5373
BMPER	3.59139	0	0	0	0	2.41623	-0.974814	0.673986	NA	1.7957	0.604056
BMPR1A	82.602	66.1486	178.036	45.6065	142.87	53.157	0.454095	0.20988	0.552794	74.3753	104.917
BMPR1B	2.39426	1.69612	1.04114	5.06739	1.24235	2.41623	0.120093	0.920026	NA	2.04519	2.44178
BMPR2	1347.97	761.557	1635.64	1918.01	2657.39	1884.66	0.971847	3.6491e-05	0.0063401	1054.76	2023.92
BMS1	890.665	569.896	947.441	681.564	652.234	1058.31	0.217059	0.238821	0.583749	730.281	834.886
BMS1P20	1726.26	1816.54	1748.08	1540.49	1095.75	4881.98	0.379049	0.438186	0.743936	1771.4	2316.58
BMS1P4	405.827	283.252	357.113	362.318	329.223	472.372	0.159772	0.464079	0.76042	344.54	380.256
BMS1P5	49.0824	33.9224	49.9749	40.5391	47.2093	27.7866	0.017865	0.961551	0.989523	41.5024	41.3775
BMS1P6	3.59139	3.39224	5.20572	0	3.72705	3.62434	-0.133653	0.893732	NA	3.49181	3.13928
BMX	1048.69	2718.88	967.223	1603.83	2918.28	1512.56	-0.0480215	0.930812	0.979999	1883.78	1750.47
BNC2	134.079	215.407	424.787	50.6739	68.3293	256.12	-0.359854	0.535939	0.805152	174.743	199.977
BNIP1	160.416	225.584	327.96	315.445	195.049	282.698	0.560925	0.0713667	0.348796	193	280.288
BNIP2	10066.7	13770.8	7164.11	10390.7	10809.7	8837.34	-0.373221	0.000197047	0.0175476	11918.7	9300.46
BNIP3	519.555	437.598	476.844	426.927	354.07	287.531	-0.302191	0.132666	0.453094	478.577	386.343
BNIP3L	12359.2	20573.9	11365.1	14153.2	10684.2	10894.8	-0.451968	0.0178112	0.177662	16466.5	11774.3
BNIPL	243.018	283.252	260.286	367.386	339.162	283.906	0.23044	0.238524	0.583406	263.135	312.685
BOC	0	5.08835	0	1.26685	4.9694	1.20811	-0.160806	0.925224	NA	2.54418	1.86109
BOD1	140.064	128.905	229.052	212.83	171.444	178.801	0.563647	0.00301307	0.0736845	134.485	198.032
BOD1L1	24548.4	34809.4	17345.5	19893.3	23055.5	20241.9	-0.553142	0.054661	0.308206	29678.9	20134.1
BOK	5.98565	10.1767	42.6869	3.80054	2.4847	15.7055	0.0535915	0.957589	0.988221	8.08118	16.1694
BOLA1	14.3656	78.0214	21.864	12.6685	9.93881	15.7055	-1.70454	0.0113969	0.145058	46.1935	15.0442
BOLA3	37.1111	22.0495	54.1395	25.3369	26.0894	68.8624	0.54527	0.21666	0.562375	29.5803	43.6071
BOLA3-AS1	104.15	132.297	164.501	117.817	141.628	130.476	0.239384	0.377418	0.701034	118.224	138.605
BOLL	7.18279	3.39224	3.12343	2.53369	2.4847	1.20811	-1.24393	0.163779	NA	5.28751	2.33749
BOP1	34.7168	57.668	71.839	40.5391	69.5717	79.7354	0.479632	0.292538	0.63379	46.1924	65.4213
BORA	246.609	139.082	279.027	226.766	232.32	281.49	0.422378	0.0156791	0.168202	192.845	254.901
BPGM	806.866	912.512	812.093	1459.41	1156.63	1051.06	0.343891	0.0543715	0.307618	859.689	1119.8
BPHL	88.5877	40.7068	51.0161	38.0054	59.6328	49.5326	-0.345172	0.269565	0.612283	64.6473	49.5467
BPI	515.963	2366.08	6620.64	1380.86	5052.64	759.903	1.7084	0.130957	0.450345	1441.02	3453.51
BPIFB3	2.39426	8.48059	7.28801	0	0	0	-3.03447	0.148942	NA	5.43743	1.822
BPNT1	231.046	162.827	352.948	293.909	429.853	316.526	0.851661	0.000730695	0.0346605	196.937	348.309
BPTF	6596.19	7713.95	6011.57	6787.77	8491.47	7226.93	-0.0117788	0.930154	0.979732	7155.07	7129.43
BRAF	938.551	1512.94	671.538	1064.15	1462.25	1123.54	-0.19745	0.367391	0.694478	1225.74	1080.37
BRAP	1525.14	1796.19	1502.37	2073.83	1844.89	2038.09	0.154676	0.223888	0.569225	1660.67	1864.79
BRAT1	350.759	335.831	250.916	366.119	383.886	283.906	-0.108706	0.806012	0.935839	343.295	321.207
BRCA1	1205.51	1127.92	991.169	1023.61	1620.03	1519.81	0.11997	0.647274	0.863764	1166.71	1288.65
BRCA2	366.322	279.86	391.47	400.324	694.474	665.67	0.694962	0.0522724	0.3025	323.091	537.985
BRCAT107	31.1254	81.4137	27.0698	0	2.4847	6.04056	-5.23534	0.0195808	0.186473	56.2695	8.89875
BRCAT54	2.39426	1.69612	9.3703	5.06739	2.4847	8.45679	1.67416	0.11975	NA	2.04519	6.34479
BRCC3	924.185	1126.22	972.429	1048.95	752.865	1028.1	-0.109365	0.514272	0.792387	1025.2	950.587
BRD1	647.648	653.006	701.731	554.879	616.206	541.234	-0.106983	0.598646	0.843497	650.327	603.513
BRD2	20439.8	39183.7	19079	29963.5	27344.1	25220.6	-0.191938	0.303448	0.64308	29811.8	25401.8
BRD3	586.594	853.147	685.073	673.963	726.775	530.361	-0.139889	0.604673	0.845738	719.871	654.043
BRD4	2364.33	3918.03	2508.12	2764.26	3605.3	2775.03	-0.0905882	0.65174	0.865932	3141.18	2913.18
BRD7	2241.03	1838.59	2594.53	2893.48	3409.01	2251.92	0.445421	0.00842384	0.124308	2039.81	2787.24
BRD7P3	59.8565	66.1486	23.9463	32.938	24.847	30.2028	-1.18488	0.000429089	0.0260628	63.0026	27.9835
BRD8	1974.07	3081.85	1997.96	2484.29	2125.66	1647.87	-0.279497	0.367801	0.694478	2527.96	2063.94
BRD9	1040.31	919.296	1025.53	1000.81	904.431	881.922	-0.034922	0.752438	0.912808	979.801	953.173
BRDT	2.39426	1.69612	2.08229	2.53369	1.24235	2.41623	0.0159153	0.991529	NA	2.04519	2.06864
BRE	1201.92	1563.82	958.894	1521.48	1064.69	1069.18	-0.274245	0.0914626	0.38789	1382.87	1153.56
BRE-AS1	31.1254	191.661	124.937	101.348	201.261	166.72	0.735731	0.219276	0.564406	111.393	148.566
BREA2	27.534	15.2651	37.4812	8.86793	13.6659	7.24868	-0.442724	0.370295	0.695407	21.3995	16.8159
BRF1	118.516	128.905	186.365	92.4798	126.72	125.644	0.0837731	0.757748	0.914772	123.71	132.802
BRF2	391.462	456.256	488.297	508.006	503.152	518.28	0.252036	0.126547	0.444388	423.859	504.434
BRI3	4064.26	5123.97	3822.04	6427.98	5432.8	4787.75	0.113594	0.575424	0.830003	4594.12	5117.64
BRI3BP	5.98565	8.48059	14.576	12.6685	12.4235	10.873	0.843658	0.209255	NA	7.23312	12.6353
BRICD5	10.7742	16.9612	26.0286	11.4016	12.4235	2.41623	-0.178488	0.826121	NA	13.8677	13.0675
BRIP1	80.2078	59.3641	183.241	68.4097	99.3881	146.182	0.811992	0.0480171	0.290357	69.786	124.305
BRIX1	344.774	274.771	579.917	377.52	355.312	449.418	0.501739	0.00415697	0.0874969	309.772	440.542
BRK1	4133.69	5091.75	4694.52	5629.87	3981.73	4270.68	0.0109981	0.949612	0.985971	4612.72	4644.2
BRMS1	1035.52	1826.72	1421.16	2109.3	2044.91	1548.8	0.33317	0.201913	0.545801	1431.12	1781.04
BRMS1L	148.444	144.17	145.76	168.491	118.023	164.303	0.0360963	0.88402	0.964422	146.307	149.144
BROX	5924.6	6384.19	4972.51	8016.61	7808.18	6469.44	0.10348	0.517399	0.793979	6154.39	6816.68
BRPF1	1403.04	1799.58	1645.01	1880	1657.3	1623.7	0.094562	0.609165	0.847264	1601.31	1701.5
BRPF3	1917.8	2947.85	1678.32	2167.58	1962.91	1997.01	-0.306469	0.104218	0.409307	2432.83	1951.46
BRSK1	33.5197	16.9612	37.4812	83.6119	80.7528	36.2434	1.15855	0.00901927	0.128356	25.2404	59.5223
BRSK2	5.98565	5.08835	8.32916	2.53369	2.4847	0	-0.875873	0.519386	NA	5.537	3.33689
BRWD1	6515.98	6048.36	5988.66	4730.41	5263.84	4987.09	-0.258233	0.0389051	0.264838	6282.17	5242.5
BRWD1-AS1	1.19713	1.69612	2.08229	2.53369	0	0	-0.299275	0.853332	NA	1.44662	1.154
BRWD1-IT2	5.98565	1.69612	2.08229	2.53369	1.24235	2.41623	-0.848746	0.44875	NA	3.84089	2.06864
BRWD3	8423.01	11923.7	5604.48	7552.94	10191	8284.03	-0.376007	0.0634667	0.332394	10173.4	7908.11
BSCL2	37.1111	28.834	54.1395	39.2723	19.8776	49.5326	0.306969	0.503504	0.78623	32.9725	40.7055
BSDC1	2892.27	3846.8	2716.35	2898.55	3046.24	2546.7	-0.265434	0.0925619	0.389704	3369.53	2801.96
BSG	1267.76	2678.17	1940.69	1693.77	1760.41	891.587	-0.303554	0.518177	0.794765	1972.97	1571.62
BSN	16.7598	6.78447	9.3703	2.53369	3.72705	6.04056	-1.09368	0.110381	NA	11.7722	5.4179
BSND	2.39426	20.3534	2.08229	7.60108	2.4847	13.2892	-0.467553	0.691009	NA	11.3738	6.36433
BSPRY	14.3656	10.1767	13.5349	5.06739	24.847	9.6649	0.102522	0.869382	0.959675	12.2711	13.2785
BST1	6425	13502.8	5095.36	9122.57	9051.77	8213.96	-0.291949	0.263734	0.607641	9963.9	7870.91
BST2	1078.61	1024.46	1713.72	3515.5	4435.19	2328.03	1.45791	0.00316043	0.0748243	1051.54	2998.11
BTAF1	7841.21	7992.11	5314	6626.88	7569.64	6256.82	-0.304406	0.164873	0.500107	7916.66	6441.83
BTBD1	2930.58	2338.95	2704.89	3129.11	2562.97	3023.91	0.112912	0.436632	0.742926	2634.76	2855.22
BTBD10	2266.17	2508.56	1491.96	1525.28	2105.78	1908.82	-0.451336	0.0148236	0.163948	2387.36	1757.96
BTBD11	670.393	142.474	562.218	404.124	185.11	161.887	-0.0450443	0.919168	0.975718	406.434	328.335
BTBD18	11.9713	8.48059	3.12343	2.53369	6.21175	6.04056	-1.30196	0.0631394	NA	10.226	4.47736
BTBD19	271.749	922.688	220.723	238.167	327.981	235.582	-1.13281	0.00880793	0.126918	597.219	255.613
BTBD2	158.021	235.76	290.479	282.507	419.915	242.831	0.655781	0.0619936	0.330117	196.891	308.933
BTBD3	430.967	123.817	239.463	319.245	392.583	270.617	0.18822	0.6253	0.853809	277.392	305.477
BTBD6	306.466	413.853	476.844	321.779	203.746	372.099	-0.104214	0.681194	0.879936	360.159	343.617
BTBD7	1672.39	1629.97	1578.37	1695.04	1716.93	1512.56	-0.0272836	0.810423	0.937691	1651.18	1625.73
BTBD8	51.4766	47.4913	26.0286	24.0701	48.4517	38.6596	-0.540238	0.180485	0.519782	49.484	34.3025
BTBD9	922.988	1194.07	740.254	817.116	1022.45	862.592	-0.294743	0.0242372	0.209049	1058.53	860.604
BTD	442.938	478.305	426.869	468.733	329.223	376.931	-0.200777	0.2567	0.600728	460.622	400.439
BTF3	7765.79	6945.6	9111.05	8116.69	6209.27	7168.94	0.0567995	0.659462	0.870236	7355.7	7651.49
BTF3L4	2312.86	1964.1	2019.82	2470.35	1769.11	2121.45	-0.0369881	0.816354	0.940693	2138.48	2095.18
BTG1	38465	49021.2	33124	29973.6	34703.8	28265	-0.460455	0.00817648	0.123782	43743.1	31516.6
BTG2	35208.8	47219.9	21113.4	24532.5	26888.2	23579.9	-0.7749	0.00139833	0.0487035	41214.4	24028.5
BTG3	351.956	293.428	395.635	319.245	212.442	304.444	-0.070385	0.834819	0.947797	322.692	307.942
BTK	7896.28	6989.7	5087.03	7810.11	7555.98	8774.52	-0.0603396	0.711223	0.896021	7442.99	7306.91
BTLA	2455.32	291.732	848.533	430.728	977.73	700.705	-0.523678	0.336598	0.672602	1373.52	739.424
BTN1A1	81.4049	52.5797	41.6458	86.1456	81.9952	73.6949	0.0558683	0.896413	0.968636	66.9923	70.8704
BTN2A1	14127.3	14408.5	9816.95	15423.9	20100	17575.6	0.0990091	0.641043	0.860466	14267.9	15729.1
BTN2A2	3347.18	1482.41	2238.46	2629.97	3459.95	3327.14	0.342777	0.342944	0.675874	2414.79	2913.88
BTN2A3P	439.347	325.655	284.232	548.545	600.055	471.164	0.27099	0.482628	0.772267	382.501	475.999
BTN3A1	42541.2	25426.5	28447.2	32475.6	62464.2	52511.8	0.392116	0.316694	0.655316	33983.9	43974.7
BTN3A2	10812.5	5587.01	14209.5	16159.9	22390.9	15338.2	1.1395	0.00107573	0.0432498	8199.75	17024.6
BTN3A3	5699.54	4019.8	6461.34	7445.26	9379.75	8037.57	0.721771	0.0052198	0.0974584	4859.67	7830.98
BTNL10	0	1.69612	3.12343	1.26685	2.4847	0	1.06548	0.591473	NA	0.848059	1.71875
BTNL2	20.3512	0	13.5349	2.53369	27.3317	14.4974	1.2753	0.241857	0.586974	10.1756	14.4744
BTNL3	1904.64	2864.74	0	1877.47	49.694	1564.51	-1.7075	0.561797	0.820965	2384.69	872.917
BTNL8	3221.48	5239.31	3230.67	3145.58	5037.73	3392.38	-0.167171	0.726661	0.902782	4230.39	3701.59
BTNL9	22.7455	15.2651	27.0698	12.6685	120.508	21.746	1.14933	0.229371	0.573804	19.0053	45.4981
BTRC	508.781	361.273	525.778	338.248	336.677	355.185	-0.152032	0.295603	0.635605	435.027	388.972
BUB1	293.297	84.8059	219.681	212.83	203.746	1309.59	1.45213	0.0549782	0.309177	189.051	486.463
BUB1B	93.3762	64.4525	190.529	103.881	149.082	378.139	1.38091	0.0167099	0.17216	78.9144	205.408
BUB3	1992.03	1819.93	2608.07	1801.46	1534.3	2087.62	0.0654878	0.654642	0.867938	1905.98	2007.86
BUD13	517.161	566.503	723.595	903.262	795.105	729.7	0.528614	6.5293e-05	0.00911783	541.832	787.915
BUD31	1977.66	2732.45	1849.07	3298.87	2935.68	2549.12	0.140838	0.4862	0.774489	2355.05	2658.18
BVES	7.18279	3.39224	3.12343	2.53369	6.21175	20.5379	0.609269	0.642852	NA	5.28751	8.1017
BYSL	178.373	150.955	119.732	88.6793	110.569	184.841	-0.386054	0.208154	0.551521	164.664	125.955
BZRAP1	1072.63	1704.6	1092.16	880.459	947.914	797.354	-0.558563	0.122699	0.439972	1388.61	929.472
BZRAP1-AS1	392.659	590.249	424.787	407.925	344.131	450.626	-0.251491	0.36848	0.694785	491.454	406.867
BZW1	6707.52	10027.5	6736.2	6623.08	7604.43	6718.31	-0.253415	0.0630408	0.331579	8367.49	6920.51
BZW2	499.204	344.312	580.959	372.453	336.677	681.376	0.230488	0.385948	0.707153	421.758	492.866
C10orf10	100.559	98.3749	103.073	172.291	134.174	112.354	0.350434	0.383391	0.705409	99.4669	130.473
C10orf105	3144.86	3629.69	2734.05	2708.52	4666.27	3270.36	-0.044038	0.874202	0.961313	3387.28	3344.8
C10orf11	87.3906	78.0214	86.415	136.819	125.477	103.898	0.401395	0.136047	0.457739	82.706	113.152
C10orf111	3.59139	10.1767	3.12343	3.80054	8.69646	12.0811	0.105301	0.922806	NA	6.88405	6.92539
C10orf113	0	39.0107	0	1.26685	0	0	-4.36495	0.453982	NA	19.5054	0.316712
C10orf12	800.881	987.141	475.803	701.833	817.467	898.836	-0.325977	0.130469	0.450015	894.011	723.485
C10orf128	4149.26	2540.79	4591.45	1997.82	2572.91	5418.38	0.125198	0.759797	0.915334	3345.02	3645.14
C10orf131	195.132	291.732	89.5384	191.294	151.567	137.725	-0.803281	0.0406689	0.269978	243.432	142.531
C10orf2	113.727	108.552	164.501	57.0081	101.873	184.841	0.145711	0.674317	0.877733	111.14	127.056
C10orf25	153.233	91.5904	160.336	216.631	144.113	158.263	0.476944	0.0771868	0.362132	122.412	169.836
C10orf32	521.949	412.157	731.925	732.238	508.122	712.786	0.526541	0.00426879	0.0889599	467.053	671.268
C10orf35	11.9713	20.3534	17.6995	10.1348	0	1.20811	-1.42631	0.0856669	0.378676	16.1624	7.26059
C10orf54	35281.8	68753.8	41211.6	33485.3	53368.9	41199.1	-0.251136	0.479447	0.771058	52017.8	42316.2
C10orf55	8.37992	30.5301	9.3703	7.60108	3.72705	1.20811	-1.31214	0.285515	NA	19.455	5.47664
C10orf67	0	0	1.04114	0	0	0	0.459933	0.849716	NA	0	0.260286
C10orf76	1253.4	1212.72	1519.03	1947.14	1534.3	1546.38	0.397349	0.0015766	0.0521186	1233.06	1636.72
C10orf82	0	0	0	0	0	0	0	1	NA	0	0
C10orf88	237.032	140.778	279.027	176.092	121.75	175.176	0.00708064	0.975235	0.992924	188.905	188.011
C10orf91	7.18279	3.39224	9.3703	0	0	4.83245	-0.832461	0.416691	NA	5.28751	3.55069
C10orf95	4.78852	0	0	6.33424	0	0	-0.776515	0.639073	NA	2.39426	1.58356
C11orf1	90.982	59.3641	137.431	65.876	45.967	79.7354	0.1059	0.711877	0.896265	75.173	82.2524
C11orf16	1.19713	0	2.08229	0	3.72705	1.20811	1.59699	0.517147	NA	0.598565	1.75436
C11orf21	4019.97	5705.74	3835.58	5543.72	5822.9	4386.66	-0.00398764	0.983198	0.994783	4862.85	4897.21
C11orf24	126.896	62.7564	94.7441	78.5445	154.052	151.014	0.386416	0.28942	0.631316	94.8261	119.589
C11orf30	2333.21	2791.81	2019.82	2159.97	2335.62	2289.37	-0.21885	0.0991069	0.401825	2562.51	2201.2
C11orf31	257.383	195.054	271.739	228.032	203.746	225.917	0.0424447	0.811498	0.938052	226.218	232.358
C11orf42	23.9426	50.8835	18.7406	16.469	29.8164	22.9541	-0.698643	0.166501	0.502903	37.4131	21.995
C11orf45	7.18279	5.08835	18.7406	2.53369	9.93881	3.62434	0.540933	0.503041	NA	6.13557	8.70936
C11orf49	184.358	249.329	264.451	276.173	229.835	196.922	0.171271	0.426121	0.735996	216.844	241.845
C11orf54	2682.77	3281.99	1580.46	2204.31	2371.65	2204.81	-0.528527	0.0110773	0.143873	2982.38	2090.31
C11orf57	790.106	551.238	927.66	784.178	704.413	827.557	0.285815	0.012644	0.152323	670.672	810.952
C11orf58	4290.52	4426.87	4599.78	5115.53	4549.49	4902.52	0.134026	0.218234	0.563284	4358.69	4791.83
C11orf63	83.7992	47.4913	67.6744	22.8032	9.93881	54.3651	-0.838421	0.0107208	0.140888	65.6452	38.6954
C11orf65	8.37992	5.08835	9.3703	1.26685	6.21175	9.6649	-0.110639	0.879344	NA	6.73414	6.62845
C11orf68	387.87	534.277	417.499	710.701	723.048	502.575	0.31995	0.085029	0.377228	461.074	588.456
C11orf71	320.831	329.047	318.59	310.378	359.039	241.623	-0.0799908	0.628143	0.854905	324.939	307.407
C11orf72	0	0	5.20572	3.80054	0	2.41623	3.51959	0.173691	NA	0	2.85562
C11orf73	317.24	234.064	414.375	329.38	368.978	283.906	0.357264	0.0469891	0.287515	275.652	349.16
C11orf74	55.068	30.5301	63.5098	63.3424	72.0564	53.157	0.562949	0.0994706	0.402026	42.7991	63.0164
C11orf80	475.261	130.601	213.435	67.1429	151.567	373.307	-0.479973	0.286963	0.629172	302.931	201.363
C11orf84	63.4479	42.403	58.3041	44.3396	45.967	48.3245	-0.0912969	0.777538	0.922135	52.9254	49.2338
C11orf85	5.98565	3.39224	17.6995	24.0701	58.3905	10.873	2.57321	0.0110827	0.143873	4.68895	27.7583
C11orf91	2.39426	3.39224	6.24687	3.80054	11.1812	2.41623	1.02481	0.363677	NA	2.89325	5.9112
C11orf94	1.19713	0	1.04114	2.53369	0	7.24868	2.13569	0.249889	NA	0.598565	2.70588
C11orf95	108.939	88.1981	115.567	82.3451	74.5411	80.9435	-0.150421	0.520826	0.796783	98.5685	88.3492
C12orf10	288.509	201.838	273.821	296.442	239.774	240.414	0.096934	0.616149	0.850141	245.173	262.613
C12orf29	202.315	147.562	304.014	140.62	167.717	167.928	0.136471	0.498142	0.783499	174.939	195.07
C12orf4	399.842	378.234	478.926	616.955	778.954	669.294	0.689436	0.00131527	0.047129	389.038	636.032
C12orf40	1.19713	0	1.04114	0	0	1.20811	-0.276663	0.885911	NA	0.598565	0.562314
C12orf42	112.53	16.9612	47.8926	10.1348	162.748	16.9136	0.144662	0.857926	0.95611	64.7457	59.4222
C12orf43	172.387	137.386	223.846	184.96	171.444	211.42	0.356648	0.0625112	0.33101	154.886	197.917
C12orf45	69.4336	33.9224	69.7567	46.8733	45.967	80.9435	0.253005	0.437998	0.743903	51.678	60.8851
C12orf49	733.841	627.564	858.944	663.828	654.719	793.73	0.128395	0.50215	0.785256	680.702	742.805
C12orf54	1.19713	1.69612	1.04114	0	0	0	-1.98251	0.295205	NA	1.44662	0.260286
C12orf56	3.59139	0	4.16458	2.53369	2.4847	0	0.449786	0.794821	NA	1.7957	2.29574
C12orf57	99.3619	96.6787	171.789	48.1402	65.8446	78.5273	-0.226314	0.422345	0.733203	98.0203	91.0752
C12orf60	25.1397	18.6573	13.5349	13.9353	13.6659	22.9541	-0.460404	0.467565	0.762597	21.8985	16.0225
C12orf65	159.218	83.1098	208.229	105.148	127.962	112.354	0.2051	0.394496	0.713973	121.164	138.423
C12orf66	251.397	145.866	198.859	98.8141	145.355	113.563	-0.493093	0.040672	0.269978	198.632	139.148
C12orf71	44.2938	40.7068	47.8926	29.1375	39.7552	33.8272	-0.189603	0.618434	0.851515	42.5003	37.6531
C12orf73	86.1934	30.5301	82.2504	48.1402	52.1787	44.7002	0.0164297	0.958802	0.988711	58.3618	56.8174
C12orf74	1.19713	0	2.08229	0	17.3929	7.24868	3.50763	0.0852212	NA	0.598565	6.68097
C12orf75	627.297	420.637	591.37	291.375	213.684	614.929	-0.313032	0.462669	0.759746	523.967	427.84
C12orf76	531.526	724.242	717.348	423.127	391.341	414.383	-0.388749	0.221451	0.567178	627.884	486.55
C12orf79	220.272	222.191	185.324	116.55	85.7222	94.2328	-0.893529	0.00535485	0.0985472	221.232	120.457
C14orf1	175.978	157.739	382.1	224.232	209.957	225.917	0.633215	0.0172483	0.17522	166.859	260.552
C14orf119	808.063	725.939	684.032	965.337	860.949	851.719	0.10624	0.498122	0.783499	767.001	840.509
C14orf132	13.1684	15.2651	42.6869	7.60108	1.24235	15.7055	-0.22174	0.751054	0.912808	14.2168	16.809
C14orf142	160.416	133.993	150.966	193.828	137.901	163.095	0.116529	0.582761	0.83404	147.204	161.447
C14orf159	5719.89	8845.26	8507.19	9743.32	7947.32	9837.66	0.332799	0.184354	0.524788	7282.57	9008.87
C14orf166	1740.63	1329.76	1911.54	2294.26	1652.33	2061.04	0.36578	0.0407512	0.270264	1535.19	1979.79
C14orf169	101.756	89.8943	186.365	88.6793	113.054	144.974	0.47315	0.0396811	0.266719	95.8252	133.268
C14orf178	1.19713	6.78447	2.08229	3.80054	0	2.41623	-0.639142	0.648108	NA	3.9908	2.07476
C14orf2	4142.07	5008.64	3609.65	5519.65	3682.33	3278.82	-0.204091	0.260946	0.60558	4575.36	4022.61
C14orf28	175.978	181.485	157.213	165.957	176.414	167.928	-0.0976793	0.657348	0.868939	178.731	166.878
C14orf37	4.78852	1.69612	0	6.33424	1.24235	1.20811	-0.625192	0.693688	NA	3.24232	2.19617
C14orf79	43.0967	39.0107	26.0286	39.2723	53.4211	30.2028	-0.186642	0.664994	0.873217	41.0537	37.2312
C14orf80	13.1684	39.0107	21.864	21.5364	16.1506	21.746	-0.262935	0.65093	0.865336	26.0896	20.3243
C14orf93	911.017	900.639	689.238	1344.12	1356.65	989.444	0.202181	0.274443	0.616549	905.828	1094.86
C15orf26	220.272	115.336	185.324	53.2076	13.6659	124.436	-0.995878	0.148923	0.475572	167.804	94.1582
C15orf27	3.59139	3.39224	7.28801	5.06739	2.4847	6.04056	0.583738	0.542632	NA	3.49181	5.22017
C15orf39	3353.16	4357.33	4393.63	5322.02	5332.17	4959.3	0.37775	0.33475	0.67019	3855.25	5001.78
C15orf40	379.491	257.81	336.29	366.119	250.955	273.033	-0.0354841	0.848465	0.951855	318.65	306.599
C15orf41	57.4623	54.2758	68.7155	30.4043	45.967	60.4056	-0.111096	0.690118	0.885204	55.869	51.3731
C15orf43	10.7742	40.7068	16.6583	6.33424	4.9694	3.62434	-1.58742	0.0448407	0.280828	25.7405	7.89657
C15orf48	29.9283	72.9331	35.3989	50.6739	59.6328	90.6084	0.308593	0.656565	0.868937	51.4307	59.0785
C15orf52	554.272	647.917	555.971	283.774	226.108	467.54	-0.721341	0.0315972	0.238708	601.094	383.348
C15orf53	7.18279	13.5689	12.4937	5.06739	1.24235	3.62434	-0.785981	0.332984	0.668922	10.3759	5.60695
C15orf54	96.9676	8.48059	22.9052	24.0701	2.4847	50.7407	-0.426154	0.642207	0.860846	52.7241	25.0502
C15orf56	0	0	2.08229	0	0	0	0.74978	0.79431	NA	0	0.520572
C15orf57	683.562	883.678	731.925	866.523	920.582	989.444	0.1644	0.264144	0.608143	783.62	877.119
C15orf61	11.9713	3.39224	14.576	7.60108	7.45411	3.62434	0.0736591	0.919628	NA	7.68177	8.31389
C15orf62	113.727	111.944	127.02	82.3451	104.357	101.481	-0.117081	0.639922	0.860145	112.836	103.801
C15orf65	9.57705	6.78447	21.864	12.6685	19.8776	18.1217	1.10655	0.218917	NA	8.18076	18.133
C16orf13	77.8135	45.7952	114.526	93.7467	94.4187	78.5273	0.649802	0.120374	0.436637	61.8044	95.3046
C16orf45	590.186	444.383	410.211	592.884	283.256	415.591	-0.296113	0.367365	0.694478	517.284	425.486
C16orf46	15.5627	10.1767	14.576	15.2022	13.6659	18.1217	0.236737	0.641231	0.860542	12.8697	15.3914
C16orf47	1.19713	0	1.04114	1.26685	0	2.41623	0.778462	0.695029	NA	0.598565	1.18105
C16orf52	489.627	295.125	398.758	225.499	269.59	217.46	-0.470903	0.0385704	0.264003	392.376	277.827
C16orf54	5782.14	12173	7871.05	7900.06	6866.47	6493.61	-0.247667	0.424085	0.734229	8977.59	7282.8
C16orf58	478.852	371.45	567.424	314.178	407.491	465.123	0.0483494	0.80502	0.935568	425.151	438.554
C16orf59	1.19713	5.08835	5.20572	6.33424	3.72705	13.2892	1.27212	0.255206	NA	3.14274	7.13906
C16orf62	829.612	719.154	887.055	1016.01	880.827	1052.27	0.303909	0.00761976	0.120006	774.383	959.04
C16orf70	1674.79	1626.58	978.676	1582.29	1116.87	1241.94	-0.463519	0.00301256	0.0736845	1650.68	1229.95
C16orf71	13.1684	15.2651	16.6583	21.5364	13.6659	7.24868	0.0727675	0.908986	0.973326	14.2168	14.7773
C16orf72	12452.6	17653.2	8312.5	14775.2	16028.8	10816.2	-0.319876	0.0646811	0.335555	15052.9	12483.2
C16orf74	16.7598	13.5689	27.0698	16.469	37.2705	27.7866	0.828104	0.104183	0.409307	15.1644	27.149
C16orf86	9.57705	35.6185	28.1109	24.0701	23.6047	22.9541	0.12102	0.839796	0.948867	22.5978	24.685
C16orf87	870.314	546.15	540.354	649.893	667.142	672.919	-0.195576	0.507507	0.788103	708.232	632.577
C16orf89	2.39426	1.69612	7.28801	0	6.21175	0	0.687351	0.584322	NA	2.04519	3.37494
C16orf90	2.39426	1.69612	0	1.26685	3.72705	1.20811	-0.526379	0.731802	NA	2.04519	1.5505
C16orf91	56.2652	67.8447	80.1681	60.8087	73.2987	59.1975	0.147925	0.682188	0.880562	62.0549	68.3683
C16orf95	9.57705	6.78447	12.4937	32.938	11.1812	26.5785	1.35633	0.0703566	NA	8.18076	20.7978
C16orf96	16.7598	49.1874	15.6172	10.1348	6.21175	1.20811	-1.89536	0.00259518	0.0683195	32.9736	8.29295
C17orf100	56.2652	22.0495	43.7281	15.2022	24.847	14.4974	-0.628987	0.14924	0.475925	39.1573	24.5686
C17orf104	34.7168	50.8835	36.4401	41.806	38.5129	71.2786	0.155249	0.692858	0.886892	42.8002	47.0094
C17orf105	1.19713	5.08835	5.20572	7.60108	13.6659	4.83245	1.38053	0.218674	NA	3.14274	7.82628
C17orf107	7.18279	61.0603	13.5349	7.60108	6.21175	6.04056	-1.69977	0.0464581	0.286258	34.1215	8.34707
C17orf47	0	0	5.20572	6.33424	12.4235	6.04056	4.9026	0.00416189	NA	0	7.50101
C17orf50	1.19713	0	3.12343	0	0	1.20811	0.433707	0.792981	NA	0.598565	1.08289
C17orf51	86.1934	94.9826	153.048	167.224	81.9952	37.4515	0.257372	0.627347	0.854905	90.588	109.93
C17orf53	329.211	364.665	111.402	73.4771	140.386	138.933	-1.59272	0.00316617	0.0748243	346.938	116.05
C17orf58	105.348	106.855	117.649	157.089	121.75	158.263	0.371188	0.131125	0.45049	106.101	138.688
C17orf59	135.276	208.623	184.283	108.949	154.052	124.436	-0.268889	0.461467	0.759471	171.949	142.93
C17orf62	3567.45	6295.99	3421.2	5599.46	7555.98	4532.84	0.0814831	0.751674	0.912808	4931.72	5277.37
C17orf67	135.276	86.502	102.032	72.2103	106.842	45.9083	-0.413872	0.180228	0.519465	110.889	81.7482
C17orf75	307.663	257.81	332.125	236.9	212.442	276.658	-0.0954705	0.645647	0.862671	282.736	264.531
C17orf77	15.5627	6.78447	5.20572	20.2696	8.69646	8.45679	-0.083377	0.903936	NA	11.1736	10.6571
C17orf78	0	0	1.04114	2.53369	3.72705	3.62434	3.32369	0.057833	NA	0	2.73156
C17orf80	404.63	283.252	409.17	390.189	401.279	396.261	0.244586	0.358052	0.686687	343.941	399.225
C17orf85	3340	4559.17	3549.26	3515.5	3832.65	3294.52	-0.148775	0.357693	0.686595	3949.58	3547.98
C17orf89	47.8852	55.9719	80.1681	70.9434	33.5435	76.1111	0.326737	0.360118	0.687555	51.9286	65.1915
C17orf96	46.6881	20.3534	19.7817	43.0728	48.4517	42.2839	-0.0532329	0.931191	0.980125	33.5208	38.3975
C17orf97	87.3906	35.6185	41.6458	67.1429	57.1481	91.8166	-0.00502	0.990527	0.997176	61.5045	64.4383
C17orf99	0	0	1.04114	0	8.69646	0	3.07062	0.176526	NA	0	2.4344
C18orf21	511.175	508.835	640.304	787.979	642.295	787.689	0.477416	0.0113143	0.144751	510.005	714.567
C18orf25	7820.86	9971.48	6681.02	7853.18	13668.3	7820.11	-0.0142034	0.947137	0.985487	8896.17	9005.67
C18orf54	108.939	76.3253	111.402	55.7413	75.7834	91.8166	-0.140436	0.641296	0.860552	92.6321	83.6859
C18orf61	21.5484	40.7068	10.4114	16.469	16.1506	4.83245	-1.36537	0.0421891	0.273725	31.1276	11.9659
C18orf65	19.1541	11.8728	18.7406	21.5364	13.6659	12.0811	0.0549984	0.940377	NA	15.5135	16.506
C18orf8	2267.37	2754.5	2203.06	2538.76	2400.22	2373.94	-0.0758112	0.56147	0.82066	2510.93	2379
C19orf12	288.509	261.202	427.91	260.97	572.724	295.988	0.515566	0.0600802	0.325135	274.855	389.398
C19orf18	50.2795	33.9224	26.0286	39.2723	37.2705	18.1217	-0.494861	0.321236	0.659419	42.1009	30.1733
C19orf24	7.18279	16.9612	19.7817	19.0027	21.12	9.6649	0.490671	0.607501	NA	12.072	17.3923
C19orf25	29.9283	49.1874	70.7978	63.3424	70.814	37.4515	0.576134	0.35313	0.682834	39.5579	60.6014
C19orf35	729.053	607.21	605.946	590.351	734.229	519.488	-0.150193	0.519389	0.795467	668.132	612.504
C19orf38	2334.41	4682.98	2414.41	4336.42	4112.18	3081.9	0.00269046	0.991199	0.997474	3508.69	3486.23
C19orf43	1398.25	1830.11	1804.3	1901.54	1459.76	1268.52	0.00417988	0.980999	0.99438	1614.18	1608.53
C19orf44	56.2652	71.237	63.5098	76.0108	73.2987	79.7354	0.202682	0.541229	0.808101	63.7511	73.1387
C19orf45	113.727	128.905	33.3166	51.9407	75.7834	49.5326	-1.37582	0.0132808	0.155885	121.316	52.6433
C19orf47	82.602	84.8059	107.238	108.949	106.842	94.2328	0.317949	0.397296	0.715927	83.704	104.315
C19orf48	140.064	81.4137	133.266	102.615	113.054	152.222	0.192146	0.567032	0.82406	110.739	125.289
C19orf52	105.348	62.7564	141.596	116.55	115.539	125.644	0.569612	0.0145712	0.162237	84.0519	124.832
C19orf53	378.293	444.383	574.712	642.291	467.124	484.453	0.391174	0.206873	0.550213	411.338	542.145
C19orf54	362.731	388.411	373.771	489.003	449.731	560.564	0.305018	0.141013	0.463434	375.571	468.267
C19orf57	2.39426	5.08835	8.32916	8.86793	8.69646	2.41623	0.991158	0.251193	NA	3.74131	7.07744
C19orf60	28.7311	25.4418	40.6046	32.938	27.3317	22.9541	0.209152	0.638049	0.859979	27.0865	30.9571
C19orf66	1060.66	1333.15	1199.4	1812.86	2083.42	1453.36	0.430667	0.252352	0.596938	1196.9	1637.26
C19orf67	3.59139	1.69612	2.08229	0	2.4847	0	-1.26322	0.386177	NA	2.64376	1.14175
C19orf68	520.752	342.616	454.98	568.814	556.573	416.799	0.211796	0.338831	0.673695	431.684	499.292
C19orf70	57.4623	55.9719	92.6619	78.5445	80.7528	56.7813	0.450617	0.251128	0.595233	56.7171	77.1851
C19orf71	45.491	66.1486	62.4687	55.7413	77.0258	43.4921	0.103738	0.865527	0.959268	55.8198	59.6819
C19orf84	10.7742	11.8728	58.3041	10.1348	13.6659	14.4974	0.922099	0.168568	0.50486	11.3235	24.1505
C1D	1315.65	2976.69	1635.64	2054.83	2056.09	1820.63	-0.117094	0.515556	0.792833	2146.17	1891.8
C1GALT1	5264.98	5966.94	6239.58	10334.9	11334	10603.6	0.748498	0.00101272	0.0415716	5615.96	9628.02
C1GALT1C1	911.017	1324.67	675.703	1052.75	1627.48	1072.8	-0.0540193	0.748805	0.91254	1117.84	1107.18
C1orf100	55.068	54.2758	49.9749	38.0054	36.0282	33.8272	-0.465436	0.209104	0.552217	54.6719	39.4589
C1orf101	34.7168	40.7068	61.4275	39.2723	37.2705	51.9488	0.340331	0.328935	0.664388	37.7118	47.4798
C1orf105	5.98565	5.08835	1.04114	10.1348	2.4847	1.20811	-0.81262	0.493739	NA	5.537	3.71718
C1orf106	11.9713	8.48059	17.6995	5.06739	16.1506	0	0.00167555	0.998819	NA	10.226	9.72935
C1orf109	215.484	103.463	174.912	140.62	115.539	164.303	-0.0740825	0.725153	0.901702	159.473	148.844
C1orf111	0	10.1767	1.04114	0	4.9694	10.873	-0.215697	0.885599	NA	5.08835	4.22089
C1orf112	536.315	395.196	472.68	608.087	649.75	623.386	0.34031	0.127206	0.44505	465.755	588.475
C1orf115	164.007	76.3253	74.9624	98.8141	130.447	114.771	-0.0558854	0.901951	0.971382	120.166	104.749
C1orf116	84.9963	66.1486	51.0161	93.7467	63.3599	79.7354	-0.122748	0.756733	0.914499	75.5725	71.9645
C1orf122	172.387	208.623	142.637	239.434	185.11	140.141	-0.135267	0.581246	0.833172	190.505	176.831
C1orf123	617.72	519.012	804.805	596.685	623.66	538.818	0.178225	0.191611	0.535282	568.366	640.992
C1orf127	31.1254	3.39224	6.24687	20.2696	4.9694	25.3704	-0.286251	0.671408	0.876096	17.2588	14.214
C1orf131	159.218	189.965	300.891	324.313	263.378	357.601	0.829707	0.000425814	0.0259694	174.592	311.546
C1orf145	21.5484	15.2651	26.0286	10.1348	17.3929	14.4974	-0.134	0.824557	0.943812	18.4067	17.0134
C1orf146	22.7455	5.08835	22.9052	5.06739	7.45411	9.6649	-0.40287	0.47387	0.767291	13.9169	11.2729
C1orf159	8.37992	6.78447	18.7406	13.9353	6.21175	16.9136	0.884492	0.274418	NA	7.58219	13.9503
C1orf162	12589	13865.8	6621.68	9574.83	12278.2	9848.53	-0.500909	0.0775831	0.362605	13227.4	9580.8
C1orf167	7.18279	1.69612	0	3.80054	3.72705	3.62434	-1.17181	0.473508	NA	4.43945	2.78798
C1orf174	1025.94	1048.2	1173.37	904.529	785.166	1048.64	-0.0960068	0.639831	0.860145	1037.07	977.927
C1orf177	29.9283	47.4913	60.3864	11.4016	9.93881	19.3298	-0.969525	0.117359	0.430794	38.7098	25.2642
C1orf186	61.0537	6.78447	41.6458	8.86793	125.477	88.1922	1.22061	0.114434	0.426156	33.9191	66.0458
C1orf189	14.3656	25.4418	17.6995	12.6685	18.6353	12.0811	-0.338037	0.491392	0.777218	19.9037	15.2711
C1orf194	25.1397	79.7176	54.1395	17.7359	26.0894	18.1217	-0.734146	0.298716	0.638344	52.4287	29.0216
C1orf195	0	0	1.04114	0	3.72705	4.83245	3.21868	0.253834	NA	0	2.40016
C1orf198	193.935	261.202	324.837	162.156	72.0564	124.436	-0.507117	0.288533	0.630234	227.569	170.871
C1orf204	185.555	103.463	84.3327	119.084	55.9058	45.9083	-0.946159	0.0215921	0.196366	144.509	76.3076
C1orf21	450.121	527.493	944.318	144.421	135.416	317.734	-0.81508	0.123991	0.441912	488.807	385.472
C1orf216	520.752	305.301	471.638	410.458	283.256	345.52	-0.102961	0.649611	0.865166	413.027	377.718
C1orf220	68.2365	13.5689	27.0698	11.4016	49.694	32.619	-0.166919	0.785349	0.92616	40.9027	30.1961
C1orf226	33.5197	122.121	18.7406	60.8087	90.6916	91.8166	-0.171001	0.767775	0.918062	77.8201	65.5144
C1orf228	209.498	369.754	439.363	404.124	708.14	306.861	0.678195	0.0724925	0.352003	289.626	464.622
C1orf233	3.59139	10.1767	13.5349	5.06739	4.9694	1.20811	-0.335922	0.789228	NA	6.88405	6.19495
C1orf234	0	0	7.28801	1.26685	1.24235	0	2.81753	0.135088	NA	0	2.4493
C1orf27	1432.97	1704.6	1294.14	1725.45	1488.34	1598.33	-0.0440905	0.768863	0.918765	1568.78	1526.56
C1orf35	87.3906	71.237	74.9624	73.4771	69.5717	88.1922	-0.0432953	0.871259	0.960262	79.3138	76.5508
C1orf43	2834.81	2829.13	3037.02	4560.65	3533.25	3936.03	0.385098	0.000887751	0.0388996	2831.97	3766.74
C1orf50	198.724	133.993	205.105	211.563	141.628	194.506	0.173207	0.432894	0.740504	166.359	188.201
C1orf52	1279.73	1965.8	1488.84	1551.89	1449.82	1425.57	-0.10695	0.414559	0.72775	1622.77	1479.03
C1orf54	55.068	42.403	66.6332	59.5418	52.1787	74.903	0.378056	0.337922	0.67316	48.7355	63.3142
C1orf56	140.064	123.817	94.7441	83.6119	84.4799	77.3192	-0.644022	0.0315625	0.238694	131.94	85.0388
C1orf61	4.78852	10.1767	10.4114	13.9353	3.72705	6.04056	0.284546	0.730424	NA	7.48262	8.52859
C1orf74	511.175	274.771	360.236	190.027	233.562	262.16	-0.539763	0.167597	0.504176	392.973	261.496
C1orf87	1.19713	0	1.04114	0	0	0	-0.785807	0.766264	NA	0.598565	0.260286
C1orf95	10.7742	11.8728	5.20572	3.80054	39.7552	2.41623	0.0724629	0.940005	0.983441	11.3235	12.7944
C1QA	71.8279	42.403	234.257	211.563	398.795	159.471	2.19906	0.00114114	0.0440591	57.1154	251.022
C1QB	43.0967	39.0107	94.7441	160.89	475.82	89.4003	2.16455	0.00401623	0.0858636	41.0537	205.214
C1QBP	337.591	274.771	456.021	418.06	315.557	594.391	0.546441	0.0280862	0.22625	306.181	446.007
C1QC	7.18279	10.1767	27.0698	51.9407	196.291	42.2839	2.99899	0.000573637	0.0300426	8.67975	79.3965
C1QL3	55.068	40.7068	55.1807	41.806	38.5129	22.9541	-0.265353	0.544789	0.809894	47.8874	39.6134
C1QTNF3	77.8135	39.0107	102.032	36.7386	53.4211	53.157	0.0412706	0.8772	0.961961	58.4121	61.3372
C1QTNF3-AMACR	2.39426	5.08835	10.4114	1.26685	2.4847	0	-0.119827	0.904699	NA	3.74131	3.54075
C1QTNF6	179.57	212.015	219.681	136.819	190.08	106.314	-0.270836	0.457603	0.757534	195.792	163.224
C1QTNF7	49.0824	39.0107	10.4114	25.3369	62.1175	44.7002	-0.592448	0.366348	0.694151	44.0465	35.6415
C1QTNF9	5.98565	8.48059	11.4526	1.26685	8.69646	2.41623	-0.39094	0.707959	NA	7.23312	5.95803
C1QTNF9B-AS1	0	0	5.20572	0	0	2.41623	2.312	0.253356	NA	0	1.90549
C1R	409.419	512.228	241.546	511.806	368.978	321.358	-0.40223	0.170422	0.507259	460.823	360.922
C1RL	10993.3	14322	5979.29	9940.95	11388.6	10163.9	-0.475086	0.0277144	0.225427	12657.6	9368.18
C1RL-AS1	438.15	3281.99	1504.45	997.009	1528.09	3739.11	0.298383	0.637172	0.859653	1860.07	1942.17
C1S	69.4336	28.834	55.1807	74.744	53.4211	48.3245	0.229163	0.550081	0.814439	49.1338	57.9176
C2	213.089	72.9331	263.41	472.534	772.742	744.197	2.06447	0.000403712	0.0256016	143.011	563.221
C2-AS1	4.78852	6.78447	7.28801	8.86793	12.4235	15.7055	0.944053	0.323163	NA	5.7865	11.0712
C20orf173	2.39426	5.08835	6.24687	2.53369	0	2.41623	-0.403089	0.686163	NA	3.74131	2.7992
C20orf194	840.386	535.973	592.411	853.855	689.505	614.929	-0.00538453	0.979286	0.994247	688.18	687.675
C20orf195	14.3656	5.08835	9.3703	3.80054	11.1812	0	-0.729555	0.45523	NA	9.72696	6.088
C20orf196	191.541	215.407	173.871	183.693	172.687	166.72	-0.220906	0.282874	0.625345	203.474	174.243
C20orf197	1441.35	1972.59	706.937	837.386	657.204	1170.66	-1.03359	0.00161981	0.0531583	1706.97	843.047
C20orf202	13.1684	0	6.24687	7.60108	2.4847	6.04056	-0.0182621	0.983821	NA	6.58422	5.5933
C20orf203	7.18279	0	6.24687	6.33424	1.24235	1.20811	0.0395936	0.969473	NA	3.59139	3.75789
C20orf24	383.082	305.301	143.678	239.434	237.289	186.049	-0.874934	0.00216831	0.061804	344.192	201.613
C20orf27	136.473	122.121	181.159	192.561	226.108	146.182	0.526648	0.100391	0.403129	129.297	186.502
C20orf62	2.39426	5.08835	6.24687	3.80054	9.93881	7.24868	0.92468	0.446294	NA	3.74131	6.80872
C20orf96	165.204	105.159	125.978	328.113	114.296	130.476	0.325764	0.401077	0.718745	135.182	174.716
C21orf140	26.3369	18.6573	26.0286	13.9353	7.45411	16.9136	-0.498955	0.275727	0.617968	22.4971	16.0829
C21orf2	210.695	145.866	206.147	186.227	186.353	165.511	0.0696506	0.765571	0.917005	178.281	186.059
C21orf33	621.311	410.461	705.896	624.556	491.971	552.107	0.21734	0.138938	0.461614	515.886	593.632
C21orf58	77.8135	54.2758	123.896	72.2103	108.085	95.4409	0.602307	0.0123961	0.151356	66.0446	99.908
C21orf59	283.72	206.926	371.689	238.167	213.684	288.739	0.189771	0.209649	0.552677	245.323	278.07
C21orf62	14.3656	1.69612	15.6172	3.80054	6.21175	3.62434	-0.0453049	0.952511	0.987169	8.03084	7.31345
C21orf62-AS1	51.4766	22.0495	38.5223	13.9353	16.1506	25.3704	-0.603956	0.139028	0.461614	36.7631	23.4946
C21orf91	2138.08	2070.96	2157.25	3613.05	3448.77	2300.25	0.416254	0.0667671	0.339808	2104.52	2879.83
C21orf91-OT1	39.5053	39.0107	34.3578	55.7413	40.9976	24.1623	-0.060902	0.917547	0.975655	39.258	38.8147
C22orf15	7.18279	5.08835	7.28801	2.53369	9.93881	2.41623	-0.155682	0.85847	NA	6.13557	5.54418
C22orf23	207.104	189.965	283.191	207.763	303.134	192.09	0.328718	0.204757	0.547261	198.534	246.544
C22orf24	33.5197	16.9612	21.864	7.60108	18.6353	9.6649	-0.815541	0.139866	0.462186	25.2404	14.4413
C22orf29	434.559	312.086	538.272	473.801	408.733	442.169	0.339717	0.10269	0.407002	373.322	465.744
C22orf34	137.67	91.5904	91.6207	136.819	122.993	112.354	0.000433979	0.999211	0.999479	114.63	115.947
C22orf39	796.092	824.313	832.916	699.3	683.293	582.31	-0.210644	0.177794	0.518157	810.203	699.455
C22orf42	1.19713	1.69612	2.08229	1.26685	0	1.20811	-0.368713	0.843477	NA	1.44662	1.13931
C22orf46	866.723	627.564	913.084	739.839	916.855	1150.12	0.337545	0.136861	0.458788	747.143	929.975
C2CD2	337.591	147.562	387.306	445.93	477.063	364.85	0.846103	0.00107425	0.0432498	242.577	418.787
C2CD2L	1895.06	1275.48	1011.99	1183.24	716.836	914.541	-0.712799	0.00165074	0.0531583	1585.27	956.651
C2CD3	2212.3	2026.86	1929.24	2358.87	3467.4	2547.91	0.256015	0.172717	0.509927	2119.58	2575.86
C2CD4D	4.78852	6.78447	5.20572	0	0	1.20811	-1.94534	0.0729342	NA	5.7865	1.60346
C2CD5	4351.57	4160.58	3467.01	3045.5	3215.2	3566.35	-0.3589	0.0983517	0.400458	4256.07	3323.52
C2orf15	14.3656	20.3534	31.2343	20.2696	13.6659	6.04056	0.0274015	0.965661	0.990968	17.3595	17.8026
C2orf16	22.7455	15.2651	27.0698	21.5364	24.847	22.9541	0.352579	0.495596	0.781386	19.0053	24.1018
C2orf27A	22.7455	13.5689	15.6172	12.6685	6.21175	22.9541	-0.31085	0.650942	0.865336	18.1572	14.3629
C2orf40	3.59139	6.78447	6.24687	0	1.24235	0	-2.25402	0.0548346	NA	5.18793	1.8723
C2orf42	395.053	237.457	329.002	335.714	321.769	334.647	0.0889153	0.664442	0.872995	316.255	330.283
C2orf44	111.333	55.9719	124.937	54.4744	70.814	90.6084	0.0702914	0.831788	0.946562	83.6525	85.2085
C2orf47	102.953	145.866	164.501	183.693	181.383	260.952	0.678517	0.0161164	0.169594	124.41	197.632
C2orf48	16.7598	44.0991	93.703	16.469	34.7858	59.1975	0.633608	0.314947	0.654457	30.4295	51.0388
C2orf49	1237.83	1967.5	1564.84	1436.6	1520.64	1708.27	-0.0222265	0.883209	0.964422	1602.67	1557.59
C2orf50	1.19713	3.39224	2.08229	2.53369	2.4847	0	-0.322243	0.837199	NA	2.29468	1.77517
C2orf61	57.4623	72.9331	47.8926	15.2022	42.2399	55.5732	-0.708349	0.180797	0.519971	65.1977	40.227
C2orf66	46.6881	22.0495	23.9463	53.2076	19.8776	20.5379	-0.370903	0.636132	0.859195	34.3688	29.3924
C2orf68	4221.08	3743.33	3285.85	3140.51	3580.46	3307.81	-0.257822	0.0954433	0.394628	3982.21	3328.66
C2orf69	1407.83	2408.49	1555.47	1754.58	1633.69	1763.84	-0.149901	0.417995	0.729721	1908.16	1676.9
C2orf71	0	0	0	1.26685	1.24235	1.20811	1.55314	0.462362	NA	0	0.929328
C2orf74	256.186	154.347	244.669	174.825	171.444	256.12	0.0661136	0.829005	0.945474	205.266	211.765
C2orf76	384.279	369.754	346.701	342.049	344.131	221.085	-0.271654	0.23002	0.574551	377.016	313.491
C2orf81	15.5627	3.39224	5.20572	6.33424	4.9694	3.62434	-0.78314	0.358968	NA	9.47747	5.03342
C2orf88	2831.21	2143.89	2792.35	1672.24	468.366	2573.28	-0.465987	0.377188	0.701034	2487.55	1876.56
C2orf91	2.39426	0	1.04114	0	2.4847	0	-0.729859	0.705155	NA	1.19713	0.881462
C3	208.301	281.556	129.102	252.103	403.764	202.963	-0.050537	0.923139	0.976813	244.928	246.983
C3AR1	7592.2	10076.6	1718.93	12169.3	26202.4	6445.28	-0.105106	0.860329	0.956532	8834.42	11634
C3orf14	33.5197	30.5301	48.9338	106.415	24.847	36.2434	0.692302	0.217334	0.562762	32.0249	54.1098
C3orf17	1834	1468.84	1854.28	1774.85	1566.6	1783.17	0.0864491	0.582069	0.833707	1651.42	1744.73
C3orf18	197.527	157.739	265.492	152.022	177.656	108.73	-0.0177218	0.956628	0.987824	177.633	175.975
C3orf20	160.416	227.28	41.6458	234.367	248.47	177.593	-0.374357	0.294049	0.63467	193.848	175.519
C3orf22	16.7598	27.1379	5.20572	24.0701	54.6634	39.8677	0.30542	0.66323	0.872497	21.9489	30.9517
C3orf33	61.0537	49.1874	43.7281	21.5364	29.8164	19.3298	-0.945868	0.0112944	0.144751	55.1206	28.6027
C3orf35	141.261	135.689	98.9087	103.881	137.901	112.354	-0.308865	0.209574	0.552675	138.475	113.261
C3orf38	1110.94	873.501	1258.74	1738.11	1739.29	1609.21	0.660096	0.00196454	0.0583582	992.219	1586.34
C3orf49	26.3369	33.9224	32.2755	21.5364	47.2093	56.7813	0.40149	0.382876	0.704809	30.1296	39.4506
C3orf52	33.5197	8.48059	30.1932	11.4016	4.9694	56.7813	0.357535	0.576376	0.830012	21.0001	25.8364
C3orf58	1862.74	1251.74	1450.31	2490.62	1816.32	1806.13	0.217933	0.357914	0.686687	1557.24	1890.85
C3orf62	6651.26	9930.77	7424.4	5178.87	4886.17	4306.92	-0.58199	0.0468979	0.287192	8291.02	5449.09
C3orf67	5.98565	5.08835	0	3.80054	0	1.20811	-2.39501	0.0847407	NA	5.537	1.25216
C3orf70	10.7742	10.1767	5.20572	11.4016	6.21175	10.873	-0.340766	0.629602	NA	10.4754	8.42303
C3orf80	1.19713	1.69612	2.08229	2.53369	3.72705	0	0.501287	0.805397	NA	1.44662	2.08576
C3orf84	0	1.69612	4.16458	0	3.72705	1.20811	1.60231	0.496078	NA	0.848059	2.27494
C4BPA	4177.99	659.79	147.843	519.407	9092.77	381.764	-1.04733	0.420612	0.731981	2418.89	2535.44
C4BPB	3.59139	5.08835	8.32916	7.60108	9.93881	1.20811	0.699412	0.467685	NA	4.33987	6.76929
C4orf17	2.39426	1.69612	2.08229	0	3.72705	1.20811	-0.131087	0.953529	NA	2.04519	1.75436
C4orf19	180.767	447.775	237.381	116.55	77.0258	170.344	-1.08076	0.0290388	0.229091	314.271	150.325
C4orf22	2.39426	3.39224	0	1.26685	2.4847	0	-1.87085	0.383061	NA	2.89325	0.937887
C4orf26	21.5484	8.48059	1.04114	7.60108	9.93881	2.41623	-1.33695	0.166742	NA	15.0145	5.24931
C4orf27	202.315	154.347	219.681	258.437	253.44	218.668	0.414441	0.0534275	0.305049	178.331	237.557
C4orf29	1007.98	966.787	772.529	1113.56	1067.18	991.86	-0.0186768	0.885286	0.964652	987.386	986.282
C4orf3	11184.8	15504.2	11694.1	13106.8	21257.9	10562.5	0.0728268	0.717479	0.899245	13344.5	14155.3
C4orf32	706.307	647.917	638.222	1204.77	1269.68	683.792	0.418561	0.124844	0.442567	677.112	949.117
C4orf33	1108.54	1253.43	1119.23	1301.05	1252.29	1211.74	0.0419519	0.820258	0.94212	1180.99	1221.08
C4orf36	2.39426	5.08835	3.12343	16.469	7.45411	1.20811	0.759943	0.566141	NA	3.74131	7.06367
C4orf45	14.3656	8.48059	15.6172	11.4016	8.69646	25.3704	0.333152	0.660419	NA	11.4231	15.2714
C4orf46	620.114	753.076	743.377	601.752	596.328	848.095	0.0292812	0.90039	0.970936	686.595	697.388
C4orf47	2.39426	0	5.20572	3.80054	1.24235	3.62434	1.51417	0.304672	NA	1.19713	3.46824
C5	519.555	357.881	534.107	513.073	725.533	747.822	0.535796	0.0127634	0.15277	438.718	630.134
C5AR1	22624.6	43086.5	22845.8	20278.4	23605.9	17807.6	-0.563704	0.145382	0.470109	32855.5	21134.4
C5AR2	1757.39	2595.06	1414.92	1831.86	1678.42	1572.96	-0.409679	0.202482	0.546033	2176.22	1624.54
C5orf15	1365.93	1200.85	1587.75	1866.07	1569.09	1356.71	0.306734	0.0109834	0.143082	1283.39	1594.9
C5orf17	0	5.08835	0	0	0	6.04056	-1.23253	0.519257	NA	2.54418	1.51014
C5orf22	624.902	415.549	583.041	520.674	752.865	664.462	0.312029	0.171256	0.508223	520.226	630.26
C5orf24	2015.97	1348.41	2062.51	1407.47	1424.98	1449.74	-0.0674677	0.663925	0.872887	1682.19	1586.17
C5orf28	271.749	188.269	292.562	140.62	157.779	159.471	-0.298479	0.125872	0.443685	230.009	187.608
C5orf30	3685.97	3212.45	1862.61	1059.08	4110.94	2721.88	-0.543961	0.453682	0.755395	3449.21	2438.63
C5orf34	81.4049	50.8835	72.8801	34.2049	45.967	74.903	-0.203472	0.503863	0.786371	66.1442	56.9887
C5orf42	205.907	140.778	297.767	112.749	212.442	138.933	0.137185	0.631331	0.856176	173.342	190.473
C5orf45	274.143	128.905	203.023	116.55	247.228	126.852	-0.166838	0.582296	0.833796	201.524	173.413
C5orf47	110.136	47.4913	21.864	98.8141	55.9058	107.522	-0.427872	0.575803	0.830003	78.8137	71.0265
C5orf51	1740.63	1139.79	1394.09	1520.22	1795.2	1876.2	0.215356	0.355833	0.685218	1440.21	1646.43
C5orf56	894.257	1455.27	1095.28	2228.38	2571.67	1279.39	0.56512	0.188186	0.530926	1174.76	1793.68
C5orf58	987.633	987.141	618.44	884.259	944.187	775.608	-0.323203	0.288821	0.630286	987.387	805.624
C5orf60	2.39426	1.69612	3.12343	1.26685	1.24235	0	-0.619832	0.733218	NA	2.04519	1.40816
C5orf63	316.043	179.789	332.125	98.8141	203.746	152.222	-0.361333	0.205837	0.548433	247.916	196.727
C5orf64	0	0	0	1.26685	0	1.20811	1.14786	0.618676	NA	0	0.61874
C5orf66	4916.62	5295.28	3308.76	2746.52	3223.9	3735.48	-0.65619	0.00523095	0.0974584	5105.95	3253.67
C5orf67	204.709	390.107	146.801	385.122	354.07	239.206	-0.135526	0.710782	0.896008	297.408	281.3
C6orf1	247.806	364.665	234.257	355.984	268.348	263.369	-0.119661	0.628128	0.854905	306.236	280.489
C6orf10	4.78852	0	3.12343	0	16.1506	2.41623	0.988605	0.453228	NA	2.39426	5.42256
C6orf106	4444.95	3460.08	4340.53	4668.33	5579.4	5153.81	0.319926	0.0251309	0.213084	3952.51	4935.52
C6orf120	907.425	761.557	906.837	629.623	862.192	792.522	-0.0584149	0.7151	0.897751	834.491	797.793
C6orf132	22.7455	22.0495	22.9052	10.1348	36.0282	27.7866	0.119379	0.865897	0.959355	22.3975	24.2137
C6orf136	666.802	854.844	776.694	862.723	519.303	729.7	-0.0550534	0.828547	0.945338	760.823	722.105
C6orf163	292.1	327.351	114.526	231.833	226.108	176.384	-0.807559	0.0477043	0.289167	309.725	187.213
C6orf165	31.1254	32.2262	16.6583	25.3369	12.4235	19.3298	-0.820934	0.169019	0.505702	31.6758	18.4371
C6orf201	49.0824	33.9224	54.1395	15.2022	23.6047	32.619	-0.458498	0.284466	0.627194	41.5024	31.3913
C6orf203	189.147	91.5904	155.131	110.216	110.569	166.72	-0.010509	0.963653	0.990092	140.369	135.659
C6orf222	20.3512	10.1767	30.1932	68.4097	120.508	27.7866	1.63594	0.0261984	0.218082	15.264	61.7244
C6orf226	28.7311	15.2651	19.7817	21.5364	9.93881	14.4974	-0.440002	0.422848	NA	21.9981	16.4386
C6orf229	325.62	573.288	386.265	260.97	323.011	306.861	-0.481654	0.0493179	0.294255	449.454	319.277
C6orf25	3219.09	5203.69	3508.66	2604.64	1462.25	3187	-0.602843	0.236216	0.581111	4211.39	2690.64
C6orf47	1374.31	1689.33	1283.73	2063.69	2233.75	1699.81	0.213337	0.0576913	0.317738	1531.82	1820.25
C6orf48	1715.49	763.253	1251.46	941.267	929.278	839.638	-0.2514	0.239603	0.584722	1239.37	990.41
C6orf52	8.37992	3.39224	9.3703	6.33424	6.21175	6.04056	0.235696	0.754087	NA	5.88608	6.98921
C6orf58	0	1.69612	0	0	0	1.20811	-1.01124	0.617005	NA	0.848059	0.302028
C6orf62	14534.4	19033.8	12545.8	13106.8	21238	13419.7	-0.163039	0.500237	0.784253	16784.1	15077.6
C6orf89	7170.81	8758.75	6262.48	7544.07	7646.67	7120.62	-0.162877	0.217992	0.563057	7964.78	7143.46
C6orf99	7.18279	3.39224	3.12343	1.26685	6.21175	3.62434	-0.698755	0.489637	NA	5.28751	3.55659
C7	0	0	3.12343	1.26685	2.4847	1.20811	2.91735	0.153258	NA	0	2.02077
C7orf13	21.5484	6.78447	26.0286	11.4016	16.1506	19.3298	0.447085	0.55281	0.815972	14.1664	18.2276
C7orf25	457.304	386.715	297.767	396.523	711.867	358.809	0.0176517	0.968915	0.991506	422.009	441.242
C7orf26	459.698	588.553	699.649	784.178	537.938	584.726	0.317204	0.130429	0.450015	524.126	651.623
C7orf31	251.397	167.916	236.34	349.65	327.981	356.393	0.582553	0.0117411	0.146808	209.657	317.591
C7orf34	185.555	493.57	192.612	168.491	115.539	349.145	-0.519857	0.280679	0.624094	339.563	206.446
C7orf43	1575.42	2535.7	1905.29	1508.81	1877.19	1125.96	-0.336293	0.27992	0.623798	2055.56	1604.32
C7orf49	1692.74	2415.27	1616.9	3279.87	4062.49	3025.11	0.486497	0.0161104	0.169594	2054.01	2996.09
C7orf50	38.3082	20.3534	52.0572	50.6739	42.2399	28.9947	0.601754	0.285655	0.628344	29.3308	43.4914
C7orf55	2.39426	3.39224	7.28801	0	3.72705	6.04056	0.542903	0.606371	NA	2.89325	4.26391
C7orf57	14.3656	8.48059	9.3703	13.9353	8.69646	9.6649	-0.177156	0.774469	NA	11.4231	10.4167
C7orf60	2146.46	2768.06	1839.7	2304.39	2622.6	2013.92	-0.172674	0.321874	0.6596	2457.26	2195.16
C7orf61	116.122	133.993	121.814	162.156	206.23	89.4003	0.13912	0.704643	0.892951	125.058	144.9
C7orf71	20.3512	30.5301	26.0286	24.0701	40.9976	16.9136	0.0958933	0.842248	0.949813	25.4407	27.0025
C7orf73	3211.9	3192.09	3068.25	3234.26	3184.15	2730.33	-0.0729931	0.628144	0.854905	3202	3054.25
C8B	0	89.8943	0	1.26685	0	1.20811	-6.58084	0.147223	NA	44.9471	0.61874
C8G	2.39426	6.78447	3.12343	3.80054	2.4847	4.83245	-0.289909	0.767782	NA	4.58937	3.56028
C8orf31	37.1111	27.1379	17.6995	50.6739	57.1481	30.2028	0.488784	0.558485	0.819323	32.1245	38.9311
C8orf33	398.645	274.771	509.12	364.852	436.065	577.478	0.503667	0.0139569	0.159045	336.708	471.879
C8orf37	99.3619	49.1874	63.5098	46.8733	45.967	53.157	-0.474314	0.0893108	0.383188	74.2746	52.3768
C8orf37-AS1	3.59139	3.39224	8.32916	5.06739	2.4847	9.6649	0.869925	0.410366	NA	3.49181	6.38654
C8orf44	259.777	183.181	190.529	212.83	187.595	199.339	-0.162262	0.562408	0.821296	221.479	197.573
C8orf44-SGK3	0	3.39224	1.04114	1.26685	2.4847	3.62434	0.570984	0.724005	NA	1.69612	2.10426
C8orf46	41.8996	117.032	65.5921	24.0701	49.694	26.5785	-0.978415	0.107393	0.415791	79.4659	41.4837
C8orf58	549.483	747.988	604.905	497.871	496.94	484.453	-0.295947	0.189323	0.532543	648.736	521.042
C8orf59	1049.88	620.779	913.084	846.254	848.526	1000.32	0.13399	0.43527	0.741863	835.332	902.045
C8orf76	96.9676	101.767	105.156	84.8788	54.6634	57.9894	-0.383625	0.309696	0.649518	99.3673	75.6718
C8orf82	29.9283	25.4418	37.4812	43.0728	31.0588	38.6596	0.439672	0.369207	0.694794	27.685	37.5681
C8orf88	26.3369	40.7068	9.3703	19.0027	22.3623	31.4109	-0.741357	0.104444	0.409607	33.5219	20.5366
C9	4.78852	1.69612	1.04114	2.53369	0	0	-1.70973	0.349303	NA	3.24232	0.89371
C9orf106	20.3512	40.7068	8.32916	21.5364	57.1481	22.9541	-0.284107	0.565212	0.822977	30.529	27.492
C9orf114	335.197	306.997	439.363	362.318	342.889	324.982	0.201	0.379649	0.702234	321.097	367.388
C9orf116	9.57705	3.39224	1.04114	1.26685	3.72705	1.20811	-2.39978	0.0753635	NA	6.48464	1.81079
C9orf117	8.37992	13.5689	9.3703	7.60108	3.72705	9.6649	-0.493153	0.399467	NA	10.9744	7.59083
C9orf131	205.907	293.428	171.789	192.561	355.312	250.079	-0.0574667	0.798501	0.932214	249.667	242.435
C9orf135	1.19713	0	0	0	0	0	-1.21183	0.769561	NA	0.598565	0
C9orf139	410.616	396.892	250.916	323.046	375.19	253.704	-0.445954	0.148838	0.475462	403.754	300.714
C9orf142	68.2365	74.6292	105.156	100.081	69.5717	48.3245	0.169265	0.75244	0.912808	71.4328	80.7832
C9orf152	3.59139	1.69612	14.576	29.1375	8.69646	22.9541	2.78334	0.0104779	NA	2.64376	18.841
C9orf153	8.37992	15.2651	7.28801	1.26685	6.21175	4.83245	-1.25275	0.0976201	NA	11.8225	4.89977
C9orf156	712.293	1475.62	659.044	722.103	498.183	885.547	-0.6179	0.0401295	0.268284	1093.96	691.219
C9orf16	37.1111	42.403	68.7155	67.1429	48.4517	50.7407	0.561285	0.197743	0.540715	39.757	58.7627
C9orf163	1.19713	1.69612	3.12343	0	1.24235	0	-0.608373	0.794015	NA	1.44662	1.09145
C9orf171	2.39426	3.39224	2.08229	8.86793	0	0	-0.125665	0.928735	NA	2.89325	2.73755
C9orf173-AS1	2.39426	3.39224	2.08229	0	4.9694	0	-0.703901	0.641745	NA	2.89325	1.76292
C9orf24	8.37992	11.8728	12.4937	6.33424	3.72705	3.62434	-0.764336	0.362827	NA	10.1264	6.54484
C9orf3	153.233	142.474	115.567	141.887	109.327	106.314	-0.331171	0.164865	0.500107	147.853	118.274
C9orf40	227.455	227.28	201.982	253.369	196.291	221.085	-0.0628998	0.765642	0.917005	227.367	218.182
C9orf41	247.806	176.396	230.093	184.96	190.08	260.952	0.0430469	0.835811	0.947815	212.101	216.521
C9orf41-AS1	22.7455	16.9612	13.5349	1.26685	13.6659	13.2892	-0.941661	0.0403184	0.269027	19.8533	10.4392
C9orf43	17.957	13.5689	11.4526	6.33424	16.1506	12.0811	-0.443221	0.447851	NA	15.763	11.5046
C9orf47	202.315	50.8835	45.8104	140.62	64.6022	86.9841	-0.494017	0.393835	0.713208	126.599	84.5042
C9orf64	178.373	188.269	211.352	169.758	203.746	239.206	0.149805	0.692737	0.886892	183.321	206.015
[truncated: 16,995 more rows]

## Sheet: Significantly regulated genes
Gene	ID1_1st	ID6_1st	ID2_1st	ID3_1st	ID4_1st	ID5_1st	log2FoldChange	pvalue	padj	meanNon_vaccine	meanVaccine
DSP	2.39426	10.1767	69.7567	141.887	950.398	100.273	5.51219	0.00146639	0.049723	6.28549	315.579
GBP1P1	25.1397	32.2262	165.542	1174.37	1851.1	457.875	4.62043	6.33691e-05	0.00911783	28.683	912.222
ETV7	286.114	45.7952	753.789	1333.99	3899.74	914.541	3.53756	0.00139312	0.0486355	165.955	1725.51
RTP4	135.276	100.071	405.005	1548.09	2157.96	1047.43	3.28771	1.23929e-06	0.000740696	117.673	1289.62
NRN1	7.18279	64.4525	206.147	292.642	514.333	100.273	3.2765	0.000205549	0.0175476	35.8176	278.349
SPATS2L	221.469	132.297	371.689	1972.48	3773.02	1512.56	3.15515	1.03637e-05	0.00297798	176.883	1907.44
LINC00189	38.3082	64.4525	229.052	331.914	878.342	440.961	3.14531	1.54532e-09	2.88628e-06	51.3803	470.067
C1QC	7.18279	10.1767	27.0698	51.9407	196.291	42.2839	2.99899	0.000573637	0.0300426	8.67975	79.3965
SERPING1	902.637	1085.52	4795.51	9315.13	14053.5	5321.74	2.95728	0.000592345	0.0302983	994.076	8371.46
GBP4	1217.48	997.317	5644.04	13784.6	12183.7	4213.9	2.94701	1.96684e-06	0.00107867	1107.4	8956.56
TGM2	8.37992	5.08835	19.7817	122.884	55.9058	30.2028	2.84047	0.00109548	0.0435338	6.73414	57.1936
GBP5	9328.04	13750.4	34853.3	88232.1	188122	60859.9	2.83677	2.9444e-06	0.00129398	11539.2	93016.8
GBP6	79.0106	169.612	400.841	635.957	1595.18	715.203	2.71169	8.14075e-06	0.00243278	124.311	836.795
HLA-H	146.05	132.297	470.597	1264.31	1665.99	611.305	2.67481	6.24379e-10	2.38955e-06	139.174	1003.05
DDX11L10	77.8135	130.601	679.867	495.337	161.506	1162.2	2.62494	5.78978e-05	0.00856543	104.207	624.729
GBP1	3948.14	5892.31	8871.59	37529.1	56766.7	24826.7	2.50661	0.000148862	0.015664	4920.23	31998.5
BATF2	239.426	278.163	520.572	2185.31	3287.26	1145.29	2.50385	0.000360719	0.023955	258.795	1784.61
CARD17	108.939	291.732	326.919	894.394	2316.98	1090.93	2.45311	2.70207e-05	0.00544132	200.336	1157.31
LGALS9C	11.9713	169.612	80.1681	457.332	877.1	155.847	2.35223	0.000209035	0.0175513	90.7916	392.612
TIMM10	1004.39	335.831	1406.59	3417.95	8357.29	2934.51	2.28892	0.00120226	0.0454789	670.112	4029.08
LOC101927354	14.3656	13.5689	47.8926	46.8733	86.9646	80.9435	2.2019	0.00129956	0.047129	13.9673	65.6685
C1QA	71.8279	42.403	234.257	211.563	398.795	159.471	2.19906	0.00114114	0.0440591	57.1154	251.022
APOL6	9951.75	11364	16667.7	62796.3	88111.3	49593	2.19454	2.72084e-05	0.00544132	10657.9	54292.1
OAS2	7158.84	4074.08	7937.68	31530.6	46719.8	24488.4	2.18792	0.00112729	0.0438644	5616.46	27669.1
IFITM3	2202.72	10458.3	12855	34270.7	41469.7	20217.8	2.1731	0.00146753	0.049723	6330.49	27203.3
XAF1	7601.78	5346.16	9026.72	34216.3	45128.4	35663.5	2.16925	0.001355	0.0477306	6473.97	31008.7
DHX58	271.749	245.937	437.281	1259.25	2092.12	943.536	2.11424	0.000256706	0.0196702	258.843	1183.05
C2	213.089	72.9331	263.41	472.534	772.742	744.197	2.06447	0.000403712	0.0256016	143.011	563.221
DDX60	3502.81	2690.04	3625.26	13764.3	23015.8	13730.2	2.00278	0.00125444	0.0462596	3096.42	13533.9
CD274	535.118	676.751	527.86	7484.53	6367.05	1714.31	1.98139	0.00145586	0.049723	605.934	4023.44
ST14	136.473	78.0214	259.245	238.167	580.178	437.337	1.87911	0.000213849	0.0177518	107.247	378.732
FBXO6	436.953	508.835	606.987	2572.97	3669.9	1384.5	1.86012	0.000417775	0.0259021	472.894	2058.59
IFI35	833.203	1295.83	1539.85	5121.86	5995.59	3670.25	1.82598	0.000596153	0.0302983	1064.52	4081.89
GBP3	1186.36	647.917	1587.75	2987.23	6060.19	2646.97	1.81047	0.000406189	0.0256016	917.137	3320.53
RUFY4	124.502	94.9826	171.789	549.812	499.425	453.042	1.8033	0.0013403	0.0477306	109.742	418.517
UBE2L6	5021.96	6479.17	10639.5	26581	30337	17110.5	1.77808	0.000103428	0.0124631	5750.57	21167
MOV10	1203.12	1109.26	1927.16	4490.97	6968.35	3474.53	1.76656	0.000675805	0.0325226	1156.19	4215.25
APOL1	2008.79	2857.96	3949.06	10356.5	16640	5830.35	1.75856	0.00019955	0.0175476	2433.37	9193.98
ZNF496	93.3762	78.0214	118.69	340.782	518.06	268.201	1.74725	0.00102186	0.0417603	85.6988	311.433
ERAP2	1795.7	885.374	7928.31	2276.52	3177.93	4499.01	1.70364	0.0013074	0.047129	1340.54	4470.45
FAM110B	32.3225	55.9719	80.1681	88.6793	197.534	204.171	1.70002	0.000440154	0.0261798	44.1472	142.638
THAP7	10.7742	11.8728	40.6046	25.3369	37.2705	38.6596	1.65895	0.000253982	0.0195619	11.3235	35.4679
IFIT5	1149.25	1718.17	1580.46	4843.16	7856.63	5053.53	1.65457	0.00134519	0.0477306	1433.71	4833.44
STAT2	12868	10649.9	14045	45451.9	55822.6	33345.1	1.511	0.000540733	0.0293805	11758.9	37166.2
AK4	31.1254	49.1874	80.1681	127.952	180.141	79.7354	1.50441	0.00116719	0.0447184	40.1564	116.999
BISPR	533.92	456.256	744.418	1801.46	2013.85	1336.17	1.49953	3.7201e-05	0.00638916	495.088	1473.97
PDGFRB	55.068	44.0991	285.274	79.8114	99.3881	142.557	1.49733	0.000714307	0.0342089	49.5835	151.758
FCGR1A	1221.07	2827.43	1623.14	9697.71	11512.9	4299.67	1.45624	0.00122341	0.0455865	2024.25	6783.35
SPRY2	64.6451	178.092	206.147	225.499	433.58	356.393	1.44872	0.000676919	0.0325226	121.369	305.405
SOCS3	2190.75	4187.72	4964.18	11300.3	13524.2	6081.64	1.41017	0.000189873	0.0175476	3189.23	8967.58
APOL3	1405.43	581.769	1890.72	4134.99	2170.39	1958.35	1.38518	4.24804e-05	0.00705269	993.6	2538.61
COA6	108.939	81.4137	225.928	298.976	229.835	219.876	1.33872	6.50014e-10	2.38955e-06	95.1763	243.654
SMG8	209.498	242.545	487.256	505.472	638.568	654.797	1.3352	8.17768e-10	2.38955e-06	226.021	571.523
NEDD4L	69.4336	33.9224	97.8676	116.55	186.353	135.309	1.31703	0.000865135	0.0383116	51.678	134.02
CASP7	530.329	262.898	551.807	1387.2	769.015	1307.18	1.30154	0.000270885	0.0203254	396.614	1003.8
AIFM3	37.1111	30.5301	62.4687	108.949	75.7834	94.2328	1.30111	0.00124936	0.0462078	33.8206	85.3584
FICD	23.9426	45.7952	57.2629	68.4097	99.3881	111.146	1.2989	0.000285574	0.0205176	34.8689	84.0518
HSBP1L1	246.609	145.866	318.59	662.561	807.528	347.936	1.29428	0.000199975	0.0175476	196.238	534.154
RARRES3	1313.25	1061.77	3045.35	3495.23	3145.63	1862.91	1.28783	2.02133e-06	0.00107867	1187.51	2887.28
FXYD6	79.0106	74.6292	77.0447	428.194	116.781	245.247	1.26052	0.00057031	0.0300426	76.8199	216.817
DTX3L	7241.45	7944.62	8320.83	20744.6	29673.6	19537.6	1.24214	0.000352409	0.0235373	7593.03	19569.1
PRR11	266.96	225.584	505.996	605.553	710.625	546.067	1.23605	1.92707e-07	0.000159968	246.272	592.06
STAT1	13636.5	16584.6	15563	46046.1	59360.8	34926.5	1.22078	0.000985819	0.0406909	15110.6	38974.1
TRIM21	2818.05	3360.01	3855.36	9881.41	11750.2	6125.13	1.2192	4.58658e-06	0.00167153	3089.03	7903.01
SAMHD1	6017.98	3767.08	8145.91	12435.4	16724.5	8340.81	1.20913	0.00032873	0.0225307	4892.53	11411.7
CD101	147.247	181.485	230.093	470	613.721	283.906	1.18622	1.85149e-05	0.00439106	164.366	399.43
APOL2	5901.86	7649.49	9095.44	21679.6	20401.9	13132.2	1.15403	0.000233796	0.0186445	6775.67	16077.3
DNASE2	883.483	407.068	1146.3	2333.53	1196.38	1250.4	1.14698	0.00105589	0.0428726	645.275	1481.65
LINC01232	113.727	144.17	265.492	217.898	370.221	283.906	1.14531	0.000133998	0.0144606	128.949	284.379
BTN3A2	10812.5	5587.01	14209.5	16159.9	22390.9	15338.2	1.1395	0.00107573	0.0432498	8199.75	17024.6
NBPF1	548.286	420.637	1360.78	957.736	1083.33	763.527	1.12056	0.000134134	0.0144606	484.462	1041.34
PLBD2	199.921	140.778	281.109	402.857	472.093	339.48	1.10611	6.3525e-05	0.00911783	170.349	373.885
GCNT2	446.53	349.4	660.086	969.138	1028.67	718.827	1.07534	0.000659903	0.0322231	397.965	844.179
WSB2	888.271	1194.07	2017.74	2262.59	3336.95	1164.62	1.06368	0.000861807	0.0383116	1041.17	2195.48
MPEG1	13278.6	9294.73	14026.3	40777.3	19790.7	25041.8	1.04511	4.81365e-05	0.00765166	11286.7	24909
ADCY3	199.921	305.301	352.948	755.041	713.109	332.231	1.0414	0.000819141	0.0372025	252.611	538.332
PEPD	192.738	127.209	242.587	425.661	324.254	332.231	1.03576	0.00110609	0.0435804	159.973	331.183
RNF26	149.641	118.728	271.739	249.569	278.287	298.404	1.03493	4.17916e-06	0.00167153	134.185	274.499
ACTA2	98.1647	156.043	204.064	315.445	387.613	141.349	1.03098	0.00098334	0.0406909	127.104	262.118
NAGPA	69.4336	105.159	186.365	177.359	176.414	169.136	1.03036	0.000441274	0.0261798	87.2965	177.318
CCDC94	167.598	262.898	339.413	599.219	364.009	437.337	1.02003	2.89132e-05	0.00546861	215.248	434.994
KLF11	805.669	1596.05	2455.02	2935.28	1883.4	2260.38	1.01967	0.000844561	0.0378962	1200.86	2383.52
C9orf91	912.214	466.433	1034.9	1525.28	1606.36	1285.43	1.01048	0.000572714	0.0300426	689.323	1362.99
PDIA3P1	119.713	27.1379	139.513	140.62	121.75	149.806	1.00712	0.00135762	0.0477306	73.4255	137.922
UBE2Q1-AS1	33.5197	55.9719	56.2218	74.744	108.085	115.979	1.00283	0.00144406	0.049723	44.7458	88.7573
MIR22HG	9732.67	19998.9	5932.44	9654.64	6213	5980.16	-1.01035	0.000485373	0.0272648	14865.8	6945.06
GOLGA8B	4616.14	2874.92	5167.2	724.637	1213.78	1992.18	-1.02037	0.0004695	0.0269818	3745.53	2274.45
FGFBP3	89.7848	66.1486	57.2629	25.3369	27.3317	43.4921	-1.02042	0.000411249	0.0256037	77.9667	38.3559
FAM53C	27232.3	22532.9	10280.3	11487.8	19282.5	10996.2	-1.02122	0.00089107	0.0389309	24882.6	13011.7
SESN1	3940.96	2988.56	2342.57	1344.12	1362.86	1738.47	-1.0391	0.00019886	0.0175476	3464.76	1697.01
FAM71F2	1975.27	2764.67	875.602	1679.84	1264.71	915.749	-1.04208	2.80406e-05	0.00544132	2369.97	1183.98
RAB39B	440.544	578.376	241.546	283.774	181.383	242.831	-1.0919	3.72289e-06	0.00158935	509.46	237.383
MIR628	181.964	276.467	96.8264	82.3451	114.296	126.852	-1.09953	7.20009e-05	0.00974547	229.216	105.08
DSEL	184.358	93.2865	137.431	34.2049	27.3317	77.3192	-1.11369	0.000299647	0.0210203	138.822	69.0717
LOC101927069	1727.46	1921.7	644.468	856.389	694.474	1239.52	-1.11441	0.00111235	0.0436238	1824.58	858.714
RNU6-78P	849.963	1243.25	365.442	485.202	526.757	535.194	-1.1255	0.000152078	0.0157947	1046.61	478.149
NLRP6	1517.96	3392.24	974.511	898.195	1140.48	1103.01	-1.1496	0.00122325	0.0455865	2455.1	1029.05
MIR646HG	732.644	1862.34	367.524	578.949	570.239	685	-1.16194	0.000670475	0.0324796	1297.49	550.428
LOC101927770	344.774	366.362	133.266	155.822	171.444	181.217	-1.16335	2.68526e-05	0.00544132	355.568	160.437
PARD6B	180.767	300.213	181.159	43.0728	81.9952	149.806	-1.16467	0.000575706	0.0300426	240.49	114.008
MIR635	167.598	405.372	120.773	107.682	122.993	142.557	-1.17982	0.00108316	0.0432744	286.485	123.501
FBXW8	450.121	926.081	418.54	193.828	262.136	344.312	-1.18255	2.80225e-05	0.00544132	688.101	304.704
BRD7P3	59.8565	66.1486	23.9463	32.938	24.847	30.2028	-1.18488	0.000429089	0.0260628	63.0026	27.9835
LOC653712	268.157	291.732	92.6619	110.216	140.386	160.679	-1.18675	0.00020015	0.0175476	279.945	125.986
SNORD12	610.537	819.225	262.368	269.838	372.705	364.85	-1.19349	0.000602237	0.0305038	714.881	317.441
SPATA6	2281.73	2354.21	1219.18	800.647	1159.11	869.841	-1.19848	0.000423649	0.0259694	2317.97	1012.2
ITM2A	915.805	924.384	692.361	452.264	154.052	347.936	-1.2071	0.00111969	0.0437967	920.095	411.653
LINC00894	560.257	1594.35	566.383	315.445	540.423	407.134	-1.20809	0.00135052	0.0477306	1077.3	457.346
LINC00936	549.483	907.423	326.919	395.256	206.23	308.069	-1.20838	0.000295553	0.0209297	728.453	309.119
SV2A	141.261	296.821	130.143	86.1456	80.7528	77.3192	-1.21057	0.000806845	0.0369355	219.041	93.5902
CERS4	950.522	1236.47	507.037	386.388	631.114	343.104	-1.22932	1.42366e-05	0.00384656	1093.5	466.911
VIPR1	2060.26	1443.4	747.542	825.984	659.688	663.254	-1.24672	0.000294271	0.0209297	1751.83	724.117
NPIPB11	293.297	590.249	178.036	171.024	200.018	173.968	-1.26053	0.000180765	0.017504	441.773	180.762
SNORD12B	820.035	1127.92	308.179	376.254	546.634	449.418	-1.26701	0.000182748	0.017504	973.977	420.121
PHF13	4356.36	2630.68	1792.85	1688.71	1751.71	1165.83	-1.26807	0.000967786	0.0405067	3493.52	1599.78
SYCP2	2233.85	3334.57	792.311	1051.48	1370.31	1371.21	-1.27078	3.64629e-07	0.000286752	2784.21	1146.33
ZNF250	205.907	461.344	146.801	102.615	171.444	113.563	-1.27119	6.88375e-07	0.000514285	333.625	133.606
SERPINA11	135.276	191.661	22.9052	91.213	105.6	91.8166	-1.28348	0.00145758	0.049723	163.469	77.8836
LOC102724050	141.261	127.209	68.7155	45.6065	55.9058	49.5326	-1.28687	5.69488e-05	0.00850929	134.235	54.9401
CASP2	4375.51	13172.1	3134.89	3435.69	3980.49	2976.79	-1.30583	2.41388e-06	0.00124373	8773.78	3381.96
PLEKHA5	107.742	208.623	84.3327	46.8733	38.5129	79.7354	-1.3149	0.000285615	0.0205176	158.182	62.3636
AMOT	94.5733	120.424	93.703	20.2696	32.3011	45.9083	-1.31545	6.46821e-05	0.00911783	107.499	48.0455
DIXDC1	53.8709	117.032	28.1109	34.2049	33.5435	37.4515	-1.32036	1.43616e-05	0.00384656	85.4515	33.3277
KIZ-AS1	50.2795	66.1486	22.9052	21.5364	23.6047	22.9541	-1.3437	0.0001669	0.0165154	58.2141	22.7501
TNFRSF12A	383.082	274.771	143.678	145.687	111.812	122.019	-1.35026	0.000848759	0.0379705	328.927	130.799
THEM5	140.064	200.142	112.444	51.9407	48.4517	74.903	-1.35239	0.000269755	0.0203254	170.103	71.9347
LOC100268168	274.143	607.21	220.723	103.881	142.87	186.049	-1.36382	0.000121016	0.0137108	440.677	163.381
UAP1L1	751.798	1007.49	270.698	300.243	243.501	542.443	-1.3932	0.000161341	0.0161101	879.646	339.221
EFHC2	496.809	971.876	446.651	230.566	175.171	254.912	-1.39887	0.00144774	0.049723	734.343	276.825
ZNF682	466.881	230.672	257.163	39.2723	104.357	147.39	-1.431	7.58238e-06	0.00238453	348.777	137.046
ADRB2	1422.19	883.678	466.433	386.388	395.068	422.839	-1.45551	1.0448e-09	2.38955e-06	1152.93	417.682
RAB3A	159.218	103.463	41.6458	53.2076	73.2987	30.2028	-1.47061	0.000932055	0.0397392	131.341	49.5887
CYP4F35P	138.867	173.004	117.649	30.4043	21.12	73.6949	-1.48834	0.000401639	0.0256016	155.936	60.7171
MIR646	37.1111	71.237	11.4526	16.469	19.8776	25.3704	-1.53859	0.000619209	0.0311523	54.174	18.2924
LINC00243	1138.47	1565.52	267.574	696.766	411.218	554.524	-1.54344	0.000239884	0.0187662	1351.99	482.52
SLC14A1	500.401	444.383	363.359	106.415	91.934	155.847	-1.57297	2.55402e-06	0.00124841	472.392	179.389
SLC8A1-AS1	67.0393	150.955	24.9875	21.5364	48.4517	43.4921	-1.57733	0.000746342	0.0351793	108.997	34.6169
ZNF254	861.934	3315.91	570.547	412.992	810.013	660.838	-1.59517	4.37124e-06	0.00167153	2088.92	613.597
SNORD12C	202.315	323.959	74.9624	60.8087	79.5105	117.187	-1.61918	1.06955e-06	0.000694835	263.137	83.1171
GPR55	186.752	576.68	166.583	121.617	59.6328	172.76	-1.63767	0.000811882	0.0369852	381.716	130.148
LINC00622	64.6451	79.7176	31.2343	20.2696	26.0894	13.2892	-1.65555	0.000792423	0.0366316	72.1813	22.7206
CSGALNACT1	7285.74	13887.8	1962.56	3335.61	6104.91	2286.96	-1.67365	0.00119201	0.0454361	10586.8	3422.51
TNF	878.694	598.73	146.801	430.728	274.56	173.968	-1.70228	0.000978332	0.0406827	738.712	256.514
SIGLEC17P	158.021	300.213	70.7978	46.8733	47.2093	114.771	-1.7328	9.4921e-05	0.0117216	229.117	69.9128
CD9	4058.27	2963.12	1811.59	734.771	878.342	931.455	-1.73295	0.000373594	0.0243766	3510.7	1089.04
PPM1E	56.2652	110.248	30.1932	19.0027	18.6353	27.7866	-1.79268	0.000232895	0.0186445	83.2564	23.9044
WNT10B	82.602	169.612	87.4561	21.5364	24.847	26.5785	-1.81499	9.32203e-05	0.0116075	126.107	40.1045
SAMSN1-AS1	32.3225	169.612	7.28801	24.0701	39.7552	27.7866	-1.84229	2.78886e-05	0.00544132	100.967	24.725
HRASLS	77.8135	130.601	22.9052	40.5391	7.45411	41.0758	-1.8566	0.00121416	0.0455865	104.207	27.9936
SNORD100	57.4623	15.2651	11.4526	7.60108	7.45411	12.0811	-1.90875	0.00107925	0.0432498	36.3637	9.64723
PZP	203.512	342.616	305.055	40.5391	26.0894	56.7813	-1.92502	0.000152217	0.0157947	273.064	107.116
GNLY	4213.9	14851.2	7459.8	1100.89	1452.31	4421.69	-1.9309	0.00082472	0.0372295	9532.56	3608.67
LINC00944	49.0824	50.8835	15.6172	2.53369	19.8776	10.873	-2.05008	0.000302489	0.0211205	49.983	12.2254
TPRG1	32.3225	78.0214	16.6583	10.1348	6.21175	18.1217	-2.05155	0.000912349	0.0394401	55.172	12.7816
WWC1	64.6451	49.1874	24.9875	10.1348	4.9694	16.9136	-2.08419	0.000395219	0.0253449	56.9162	14.2513
LINC00943	31.1254	50.8835	18.7406	1.26685	17.3929	2.41623	-2.08466	0.00138354	0.048414	41.0045	9.95415
ZNF157	41.8996	28.834	21.864	5.06739	6.21175	4.83245	-2.08734	0.000482193	0.0272648	35.3668	9.49391
ZNF697	894.257	1365.38	203.023	249.569	362.766	248.871	-2.08941	5.70084e-11	4.25909e-07	1129.82	266.057
TIAM2	2420.6	725.939	365.442	473.801	434.823	259.744	-2.09693	0.000228189	0.0186445	1573.27	383.452
PLCL1	3246.62	3970.61	745.459	514.34	1246.08	821.517	-2.11475	2.09896e-08	3.03687e-05	3608.62	831.848
KCNH8	272.946	44.0991	89.5384	11.4016	8.69646	37.4515	-2.16538	0.000794314	0.0366316	158.522	36.772
MCAM	79.0106	653.006	66.6332	38.0054	74.5411	106.314	-2.18283	0.000187122	0.0175476	366.008	71.3734
FRMPD3	44.2938	84.8059	51.0161	6.33424	4.9694	10.873	-2.1856	0.000395012	0.0253449	64.5499	18.2982
LOC101928075	49.0824	72.9331	24.9875	6.33424	18.6353	3.62434	-2.21976	0.000864757	0.0383116	61.0077	13.3953
FOXC1	211.892	659.79	32.2755	127.952	223.623	45.9083	-2.22364	0.000558195	0.0300426	435.841	107.44
PEX11G	61.0537	83.1098	10.4114	22.8032	16.1506	12.0811	-2.24862	0.000184048	0.0175162	72.0817	15.3616
HSD3BP4	52.6738	52.5797	9.3703	3.80054	17.3929	9.6649	-2.4015	8.28124e-05	0.0105759	52.6267	10.0572
CASC15	37.1111	27.1379	4.16458	3.80054	4.9694	9.6649	-2.51286	0.000534644	0.0291556	32.1245	5.64986
NSG1	80.2078	174.7	74.9624	10.1348	28.5741	7.24868	-2.53518	0.00022385	0.0184793	127.454	30.23
CD300LD	29.9283	81.4137	9.3703	12.6685	8.69646	4.83245	-2.56955	0.00131154	0.047129	55.671	8.89192
TTC9	428.573	3410.89	470.597	122.884	532.969	119.603	-2.57252	0.000194703	0.0175476	1919.73	311.513
HSPA1B	958.902	481.698	72.8801	235.634	201.261	79.7354	-2.71602	7.37172e-08	7.34322e-05	720.3	147.377
CORIN	122.107	213.711	18.7406	15.2022	7.45411	54.3651	-2.78994	3.39784e-05	0.00632805	167.909	23.9405
CCL4	306.466	5086.66	828.751	172.291	293.195	462.707	-2.82017	0.000202313	0.0175476	2696.56	439.236
FLT1	897.848	4667.72	396.676	362.318	192.564	218.668	-2.99171	0.00122318	0.0455865	2782.78	292.557
PARD3B	77.8135	13.5689	3.12343	7.60108	1.24235	4.83245	-3.03913	0.00132933	0.0475188	45.6912	4.19983
CYP2B7P	49.0824	33.9224	6.24687	6.33424	3.72705	3.62434	-3.06985	4.00359e-05	0.00672153	41.5024	4.98312
EFNA5	39.5053	378.234	51.0161	12.6685	12.4235	13.2892	-3.34438	1.44162e-05	0.00384656	208.87	22.3493
SPATA3-AS1	33.5197	284.948	22.9052	8.86793	3.72705	7.24868	-3.78572	9.79052e-05	0.011991	159.234	10.6872
ENTPD2	37.1111	149.258	14.576	5.06739	6.21175	2.41623	-3.79552	0.000980176	0.0406827	93.1847	7.06785
AQP7P1	43.0967	118.728	7.28801	3.80054	3.72705	8.45679	-3.81425	1.43229e-05	0.00384656	80.9125	5.8181

## Sheet: GSEA-H
Gene Set Name	# Genes in Gene Set (K)	Description	# Genes in Overlap (k)	k/K	p-value	FDR q-value
HALLMARK_INTERFERON_GAMMA_RESPONSE	200	Genes up-regulated in response to IFNG [GeneID=3458].	21	0.105	4.54e-30	2.27e-28
HALLMARK_INTERFERON_ALPHA_RESPONSE	97	Genes up-regulated in response to alpha interferon proteins.	11	0.1134	1.61e-16	4.02e-15
HALLMARK_COMPLEMENT	200	Genes encoding components of the complement system, which is part of the innate immune system.	6	0.03	4.37e-06	7.28e-05
HALLMARK_APOPTOSIS	161	Genes mediating programmed cell death (apoptosis) by activation of caspases.	4	0.0248	0.000386	0.00482
HALLMARK_IL6_JAK_STAT3_SIGNALING	87	Genes up-regulated by IL6 [GeneID=3569] via STAT3 [GeneID=6774], e.g., during acute phase response.	3	0.0345	0.000844	0.00725
HALLMARK_HYPOXIA	200	Genes up-regulated in response to low oxygen levels (hypoxia).	4	0.02	0.00087	0.00725
Gene Symbol	HALLMARK_INTERFERON_GAMMA_RESPONSE	HALLMARK_INTERFERON_ALPHA_RESPONSE	HALLMARK_COMPLEMENT	HALLMARK_IL6_JAK_STAT3_SIGNALING
IFITM3	HALLMARK_INTERFERON_GAMMA_RESPONSE	HALLMARK_INTERFERON_ALPHA_RESPONSE
STAT2	HALLMARK_INTERFERON_GAMMA_RESPONSE	HALLMARK_INTERFERON_ALPHA_RESPONSE		HALLMARK_IL6_JAK_STAT3_SIGNALING
GBP4	HALLMARK_INTERFERON_GAMMA_RESPONSE	HALLMARK_INTERFERON_ALPHA_RESPONSE
RTP4	HALLMARK_INTERFERON_GAMMA_RESPONSE	HALLMARK_INTERFERON_ALPHA_RESPONSE
UBE2L6	HALLMARK_INTERFERON_GAMMA_RESPONSE	HALLMARK_INTERFERON_ALPHA_RESPONSE
BATF2	HALLMARK_INTERFERON_GAMMA_RESPONSE	HALLMARK_INTERFERON_ALPHA_RESPONSE
IFI35	HALLMARK_INTERFERON_GAMMA_RESPONSE	HALLMARK_INTERFERON_ALPHA_RESPONSE
DDX60	HALLMARK_INTERFERON_GAMMA_RESPONSE	HALLMARK_INTERFERON_ALPHA_RESPONSE
TRIM21	HALLMARK_INTERFERON_GAMMA_RESPONSE	HALLMARK_INTERFERON_ALPHA_RESPONSE
DHX58	HALLMARK_INTERFERON_GAMMA_RESPONSE	HALLMARK_INTERFERON_ALPHA_RESPONSE
CASP7	HALLMARK_INTERFERON_GAMMA_RESPONSE		HALLMARK_COMPLEMENT
SERPING1	HALLMARK_INTERFERON_GAMMA_RESPONSE		HALLMARK_COMPLEMENT
STAT1	HALLMARK_INTERFERON_GAMMA_RESPONSE			HALLMARK_IL6_JAK_STAT3_SIGNALING
SOCS3	HALLMARK_INTERFERON_GAMMA_RESPONSE			HALLMARK_IL6_JAK_STAT3_SIGNALING
CD274	HALLMARK_INTERFERON_GAMMA_RESPONSE
GBP6	HALLMARK_INTERFERON_GAMMA_RESPONSE
FCGR1A	HALLMARK_INTERFERON_GAMMA_RESPONSE
SAMHD1	HALLMARK_INTERFERON_GAMMA_RESPONSE
OAS2	HALLMARK_INTERFERON_GAMMA_RESPONSE
XAF1	HALLMARK_INTERFERON_GAMMA_RESPONSE
APOL6	HALLMARK_INTERFERON_GAMMA_RESPONSE
MOV10		HALLMARK_INTERFERON_ALPHA_RESPONSE
C2			HALLMARK_COMPLEMENT
C1QA			HALLMARK_COMPLEMENT
ERAP2			HALLMARK_COMPLEMENT
C1QC			HALLMARK_COMPLEMENT

## Sheet: GSEA-C2
Gene Set Name	# Genes in Gene Set (K)	Description	# Genes in Overlap (k)	k/K	p-value	FDR q-value
BLANCO_MELO_HUMAN_PARAINFLUENZA_VIRUS_3_INFECTION_A594_CELLS_UP	204	Genes up-regulated in HPIV3 (A549 cells, MOI: 2, 24hpi)	27	0.1324	1.48e-41	9.3e-38
BLANCO_MELO_BRONCHIAL_EPITHELIAL_CELLS_INFLUENZA_A_DEL_NS1_INFECTION_UP	644	Genes up-regulated on infection of normal human bronchial epithelial cells by mutant Influenza A lacking its antiviral antagonist (IAV_NS1) (MOI: 3, 12hpi)	31	0.0481	6.55e-34	2.06e-30
SANA_RESPONSE_TO_IFNG_UP	76	Genes up-regulated in five primary endothelial cell types (lung, aortic, iliac, dermal, and colon) by IFNG [GeneID=3458].	18	0.2368	1.12e-32	2.35e-29
BLANCO_MELO_COVID19_SARS_COV_2_INFECTION_CALU3_CELLS_UP	339	Genes up-regulated in SARS-CoV-2 infection (Calu-3 cells, MOI: 2, 24hpi)	23	0.0678	1.89e-28	2.47e-25
BLANCO_MELO_RESPIRATORY_SYNCYTIAL_VIRUS_INFECTION_A594_CELLS_UP	286	Genes up-regulated in RSV (A549 cells, MOI: 2, 24hpi)	22	0.0769	1.96e-28	2.47e-25
REACTOME_INTERFERON_SIGNALING	203	Interferon Signaling	18	0.0887	1.8e-24	1.89e-21
BLANCO_MELO_BETA_INTERFERON_TREATED_BRONCHIAL_EPITHELIAL_CELLS_UP	378	Genes up-regulated on treatment of normal human bronchial epithelial cells with beta interferon (hIFNB treatment 100u/ml, 4-12hrs).	21	0.0556	3.73e-24	3.35e-21
BOSCO_INTERFERON_INDUCED_ANTIVIRAL_MODULE	78	Genes representing interferon-induced antiviral module in sputum during asthma exacerbations.	13	0.1667	1.23e-21	9.66e-19
SALVADOR_MARTIN_PEDIATRIC_TBD_ANTI_TNF_THERAPY_NONRESPONDER_POST_TREATMENT_UP	26	Genes upregulated in anti-TNF therapy non-responders vs. responders after two weeks of anti-TNF therapy	10	0.3846	5.19e-21	3.62e-18
HECKER_IFNB1_TARGETS	95	Genes transcriptionally modulated in the blood of multiple sclerosis patients in response to subcutaneous treatment with recombinant IFNB1 [GeneID = 3456].	13	0.1368	1.89e-20	1.19e-17
XIE_ST_HSC_S1PR3_OE_UP	188	Genes upregulated in short-term hematopoietic stem cells (CD34+,CD38_,CD45RA_,CD90_,CD49f_) upon overexpression of Sphingosine-1-Phosphate Receptor 3 (S1PR3)	15	0.0798	8.23e-20	4.7e-17
NUYTTEN_EZH2_TARGETS_UP	1033	Genes up-regulated in PC3 cells (prostate cancer) after knockdown of EZH2 [GeneID=2146] by RNAi.	24	0.0232	1e-18	5.26e-16
REACTOME_INTERFERON_GAMMA_SIGNALING	93	Interferon gamma signaling	11	0.1183	9.91e-17	4.8e-14
BROWNE_INTERFERON_RESPONSIVE_GENES	67	Genes up-regulated in primary fibroblast culture after treatment with interferon alpha for 6 h.	10	0.1493	2.26e-16	1.01e-13
REACTOME_INTERFERON_ALPHA_BETA_SIGNALING	73	Interferon alpha/beta signaling	10	0.137	5.6e-16	2.35e-13
TAKEDA_TARGETS_OF_NUP98_HOXA9_FUSION_3D_UP	186	Genes up-regulated in CD34+ [GeneID=947] hematopoetic cells by expression of NUP98-HOXA9 fusion [GeneID=4928;3205] off a retroviral vector at 3 days after transduction.	12	0.0645	6.38e-15	2.51e-12
REACTOME_CYTOKINE_SIGNALING_IN_IMMUNE_SYSTEM	719	Cytokine Signaling in Immune system	18	0.025	1.07e-14	3.97e-12
BLANCO_MELO_COVID19_SARS_COV_2_INFECTION_A594_ACE2_EXPRESSING_CELLS_UP	542	Genes up-regulated in SARS-CoV-2 infection (ACE2 expressing A549 cells, MOI: 2, 24hpi)	16	0.0295	3.07e-14	1.07e-11
GRAESSMANN_RESPONSE_TO_MC_AND_SERUM_DEPRIVATION_UP	218	Genes up-regulated in ME-A cells (breast cancer, sensitive to apoptotic stimuli) upon serum deprivation for 22 hr in the presence of medium concentrate (MC) from ME-C cells (breast cancer, resistant to apoptotic stimuli).	12	0.055	4.29e-14	1.42e-11
FULCHER_INFLAMMATORY_RESPONSE_LECTIN_VS_LPS_DN	458	Genes down-regulated in monocyte-derived dendritic cells (MDDC) after stimulation with galecin-1 (lectin, LGALS1) [GeneID=3956] compared to that with bacterial lipopolysaccharide (LPS).	15	0.0328	4.7e-14	1.48e-11
Gene Symbol	BLANCO_MELO_HUMAN_PARAINFLUENZA_VIRUS_3_INFECTION_A594_CELLS_UP	BLANCO_MELO_BRONCHIAL_EPITHELIAL_CELLS_INFLUENZA_A_DEL_NS1_INFECTION_UP	SANA_RESPONSE_TO_IFNG_UP	BLANCO_MELO_COVID19_SARS_COV_2_INFECTION_CALU3_CELLS_UP	BLANCO_MELO_RESPIRATORY_SYNCYTIAL_VIRUS_INFECTION_A594_CELLS_UP	REACTOME_INTERFERON_SIGNALING	BLANCO_MELO_BETA_INTERFERON_TREATED_BRONCHIAL_EPITHELIAL_CELLS_UP	BOSCO_INTERFERON_INDUCED_ANTIVIRAL_MODULE	REACTOME_INTERFERON_GAMMA_SIGNALING	BROWNE_INTERFERON_RESPONSIVE_GENES	REACTOME_INTERFERON_ALPHA_BETA_SIGNALING	REACTOME_CYTOKINE_SIGNALING_IN_IMMUNE_SYSTEM	BLANCO_MELO_COVID19_SARS_COV_2_INFECTION_A594_ACE2_EXPRESSING_CELLS_UP	FULCHER_INFLAMMATORY_RESPONSE_LECTIN_VS_LPS_DN
GBP1	BLANCO_MELO_HUMAN_PARAINFLUENZA_VIRUS_3_INFECTION_A594_CELLS_UP	BLANCO_MELO_BRONCHIAL_EPITHELIAL_CELLS_INFLUENZA_A_DEL_NS1_INFECTION_UP	SANA_RESPONSE_TO_IFNG_UP	BLANCO_MELO_COVID19_SARS_COV_2_INFECTION_CALU3_CELLS_UP	BLANCO_MELO_RESPIRATORY_SYNCYTIAL_VIRUS_INFECTION_A594_CELLS_UP	REACTOME_INTERFERON_SIGNALING	BLANCO_MELO_BETA_INTERFERON_TREATED_BRONCHIAL_EPITHELIAL_CELLS_UP		REACTOME_INTERFERON_GAMMA_SIGNALING	BROWNE_INTERFERON_RESPONSIVE_GENES		REACTOME_CYTOKINE_SIGNALING_IN_IMMUNE_SYSTEM		FULCHER_INFLAMMATORY_RESPONSE_LECTIN_VS_LPS_DN
SAMHD1	BLANCO_MELO_HUMAN_PARAINFLUENZA_VIRUS_3_INFECTION_A594_CELLS_UP	BLANCO_MELO_BRONCHIAL_EPITHELIAL_CELLS_INFLUENZA_A_DEL_NS1_INFECTION_UP	SANA_RESPONSE_TO_IFNG_UP	BLANCO_MELO_COVID19_SARS_COV_2_INFECTION_CALU3_CELLS_UP	BLANCO_MELO_RESPIRATORY_SYNCYTIAL_VIRUS_INFECTION_A594_CELLS_UP	REACTOME_INTERFERON_SIGNALING	BLANCO_MELO_BETA_INTERFERON_TREATED_BRONCHIAL_EPITHELIAL_CELLS_UP			BROWNE_INTERFERON_RESPONSIVE_GENES	REACTOME_INTERFERON_ALPHA_BETA_SIGNALING	REACTOME_CYTOKINE_SIGNALING_IN_IMMUNE_SYSTEM
UBE2L6	BLANCO_MELO_HUMAN_PARAINFLUENZA_VIRUS_3_INFECTION_A594_CELLS_UP	BLANCO_MELO_BRONCHIAL_EPITHELIAL_CELLS_INFLUENZA_A_DEL_NS1_INFECTION_UP	SANA_RESPONSE_TO_IFNG_UP	BLANCO_MELO_COVID19_SARS_COV_2_INFECTION_CALU3_CELLS_UP	BLANCO_MELO_RESPIRATORY_SYNCYTIAL_VIRUS_INFECTION_A594_CELLS_UP	REACTOME_INTERFERON_SIGNALING				BROWNE_INTERFERON_RESPONSIVE_GENES		REACTOME_CYTOKINE_SIGNALING_IN_IMMUNE_SYSTEM		FULCHER_INFLAMMATORY_RESPONSE_LECTIN_VS_LPS_DN
STAT1	BLANCO_MELO_HUMAN_PARAINFLUENZA_VIRUS_3_INFECTION_A594_CELLS_UP	BLANCO_MELO_BRONCHIAL_EPITHELIAL_CELLS_INFLUENZA_A_DEL_NS1_INFECTION_UP	SANA_RESPONSE_TO_IFNG_UP	BLANCO_MELO_COVID19_SARS_COV_2_INFECTION_CALU3_CELLS_UP	BLANCO_MELO_RESPIRATORY_SYNCYTIAL_VIRUS_INFECTION_A594_CELLS_UP	REACTOME_INTERFERON_SIGNALING			REACTOME_INTERFERON_GAMMA_SIGNALING	BROWNE_INTERFERON_RESPONSIVE_GENES	REACTOME_INTERFERON_ALPHA_BETA_SIGNALING	REACTOME_CYTOKINE_SIGNALING_IN_IMMUNE_SYSTEM
BATF2	BLANCO_MELO_HUMAN_PARAINFLUENZA_VIRUS_3_INFECTION_A594_CELLS_UP	BLANCO_MELO_BRONCHIAL_EPITHELIAL_CELLS_INFLUENZA_A_DEL_NS1_INFECTION_UP	SANA_RESPONSE_TO_IFNG_UP	BLANCO_MELO_COVID19_SARS_COV_2_INFECTION_CALU3_CELLS_UP	BLANCO_MELO_RESPIRATORY_SYNCYTIAL_VIRUS_INFECTION_A594_CELLS_UP		BLANCO_MELO_BETA_INTERFERON_TREATED_BRONCHIAL_EPITHELIAL_CELLS_UP						BLANCO_MELO_COVID19_SARS_COV_2_INFECTION_A594_ACE2_EXPRESSING_CELLS_UP
DTX3L	BLANCO_MELO_HUMAN_PARAINFLUENZA_VIRUS_3_INFECTION_A594_CELLS_UP	BLANCO_MELO_BRONCHIAL_EPITHELIAL_CELLS_INFLUENZA_A_DEL_NS1_INFECTION_UP	SANA_RESPONSE_TO_IFNG_UP	BLANCO_MELO_COVID19_SARS_COV_2_INFECTION_CALU3_CELLS_UP	BLANCO_MELO_RESPIRATORY_SYNCYTIAL_VIRUS_INFECTION_A594_CELLS_UP		BLANCO_MELO_BETA_INTERFERON_TREATED_BRONCHIAL_EPITHELIAL_CELLS_UP
APOL3	BLANCO_MELO_HUMAN_PARAINFLUENZA_VIRUS_3_INFECTION_A594_CELLS_UP	BLANCO_MELO_BRONCHIAL_EPITHELIAL_CELLS_INFLUENZA_A_DEL_NS1_INFECTION_UP	SANA_RESPONSE_TO_IFNG_UP	BLANCO_MELO_COVID19_SARS_COV_2_INFECTION_CALU3_CELLS_UP	BLANCO_MELO_RESPIRATORY_SYNCYTIAL_VIRUS_INFECTION_A594_CELLS_UP									FULCHER_INFLAMMATORY_RESPONSE_LECTIN_VS_LPS_DN
OAS2	BLANCO_MELO_HUMAN_PARAINFLUENZA_VIRUS_3_INFECTION_A594_CELLS_UP	BLANCO_MELO_BRONCHIAL_EPITHELIAL_CELLS_INFLUENZA_A_DEL_NS1_INFECTION_UP	SANA_RESPONSE_TO_IFNG_UP	BLANCO_MELO_COVID19_SARS_COV_2_INFECTION_CALU3_CELLS_UP		REACTOME_INTERFERON_SIGNALING		BOSCO_INTERFERON_INDUCED_ANTIVIRAL_MODULE	REACTOME_INTERFERON_GAMMA_SIGNALING	BROWNE_INTERFERON_RESPONSIVE_GENES	REACTOME_INTERFERON_ALPHA_BETA_SIGNALING	REACTOME_CYTOKINE_SIGNALING_IN_IMMUNE_SYSTEM		FULCHER_INFLAMMATORY_RESPONSE_LECTIN_VS_LPS_DN
ETV7	BLANCO_MELO_HUMAN_PARAINFLUENZA_VIRUS_3_INFECTION_A594_CELLS_UP	BLANCO_MELO_BRONCHIAL_EPITHELIAL_CELLS_INFLUENZA_A_DEL_NS1_INFECTION_UP	SANA_RESPONSE_TO_IFNG_UP	BLANCO_MELO_COVID19_SARS_COV_2_INFECTION_CALU3_CELLS_UP
GBP3	BLANCO_MELO_HUMAN_PARAINFLUENZA_VIRUS_3_INFECTION_A594_CELLS_UP	BLANCO_MELO_BRONCHIAL_EPITHELIAL_CELLS_INFLUENZA_A_DEL_NS1_INFECTION_UP	SANA_RESPONSE_TO_IFNG_UP		BLANCO_MELO_RESPIRATORY_SYNCYTIAL_VIRUS_INFECTION_A594_CELLS_UP	REACTOME_INTERFERON_SIGNALING	BLANCO_MELO_BETA_INTERFERON_TREATED_BRONCHIAL_EPITHELIAL_CELLS_UP		REACTOME_INTERFERON_GAMMA_SIGNALING			REACTOME_CYTOKINE_SIGNALING_IN_IMMUNE_SYSTEM
APOL1	BLANCO_MELO_HUMAN_PARAINFLUENZA_VIRUS_3_INFECTION_A594_CELLS_UP	BLANCO_MELO_BRONCHIAL_EPITHELIAL_CELLS_INFLUENZA_A_DEL_NS1_INFECTION_UP	SANA_RESPONSE_TO_IFNG_UP		BLANCO_MELO_RESPIRATORY_SYNCYTIAL_VIRUS_INFECTION_A594_CELLS_UP			BOSCO_INTERFERON_INDUCED_ANTIVIRAL_MODULE
XAF1	BLANCO_MELO_HUMAN_PARAINFLUENZA_VIRUS_3_INFECTION_A594_CELLS_UP	BLANCO_MELO_BRONCHIAL_EPITHELIAL_CELLS_INFLUENZA_A_DEL_NS1_INFECTION_UP		BLANCO_MELO_COVID19_SARS_COV_2_INFECTION_CALU3_CELLS_UP	BLANCO_MELO_RESPIRATORY_SYNCYTIAL_VIRUS_INFECTION_A594_CELLS_UP	REACTOME_INTERFERON_SIGNALING	BLANCO_MELO_BETA_INTERFERON_TREATED_BRONCHIAL_EPITHELIAL_CELLS_UP	BOSCO_INTERFERON_INDUCED_ANTIVIRAL_MODULE		BROWNE_INTERFERON_RESPONSIVE_GENES	REACTOME_INTERFERON_ALPHA_BETA_SIGNALING	REACTOME_CYTOKINE_SIGNALING_IN_IMMUNE_SYSTEM		FULCHER_INFLAMMATORY_RESPONSE_LECTIN_VS_LPS_DN
STAT2	BLANCO_MELO_HUMAN_PARAINFLUENZA_VIRUS_3_INFECTION_A594_CELLS_UP	BLANCO_MELO_BRONCHIAL_EPITHELIAL_CELLS_INFLUENZA_A_DEL_NS1_INFECTION_UP		BLANCO_MELO_COVID19_SARS_COV_2_INFECTION_CALU3_CELLS_UP	BLANCO_MELO_RESPIRATORY_SYNCYTIAL_VIRUS_INFECTION_A594_CELLS_UP	REACTOME_INTERFERON_SIGNALING	BLANCO_MELO_BETA_INTERFERON_TREATED_BRONCHIAL_EPITHELIAL_CELLS_UP	BOSCO_INTERFERON_INDUCED_ANTIVIRAL_MODULE			REACTOME_INTERFERON_ALPHA_BETA_SIGNALING	REACTOME_CYTOKINE_SIGNALING_IN_IMMUNE_SYSTEM	BLANCO_MELO_COVID19_SARS_COV_2_INFECTION_A594_ACE2_EXPRESSING_CELLS_UP
APOL6	BLANCO_MELO_HUMAN_PARAINFLUENZA_VIRUS_3_INFECTION_A594_CELLS_UP	BLANCO_MELO_BRONCHIAL_EPITHELIAL_CELLS_INFLUENZA_A_DEL_NS1_INFECTION_UP		BLANCO_MELO_COVID19_SARS_COV_2_INFECTION_CALU3_CELLS_UP	BLANCO_MELO_RESPIRATORY_SYNCYTIAL_VIRUS_INFECTION_A594_CELLS_UP		BLANCO_MELO_BETA_INTERFERON_TREATED_BRONCHIAL_EPITHELIAL_CELLS_UP	BOSCO_INTERFERON_INDUCED_ANTIVIRAL_MODULE					BLANCO_MELO_COVID19_SARS_COV_2_INFECTION_A594_ACE2_EXPRESSING_CELLS_UP
DHX58	BLANCO_MELO_HUMAN_PARAINFLUENZA_VIRUS_3_INFECTION_A594_CELLS_UP	BLANCO_MELO_BRONCHIAL_EPITHELIAL_CELLS_INFLUENZA_A_DEL_NS1_INFECTION_UP		BLANCO_MELO_COVID19_SARS_COV_2_INFECTION_CALU3_CELLS_UP	BLANCO_MELO_RESPIRATORY_SYNCYTIAL_VIRUS_INFECTION_A594_CELLS_UP		BLANCO_MELO_BETA_INTERFERON_TREATED_BRONCHIAL_EPITHELIAL_CELLS_UP	BOSCO_INTERFERON_INDUCED_ANTIVIRAL_MODULE					BLANCO_MELO_COVID19_SARS_COV_2_INFECTION_A594_ACE2_EXPRESSING_CELLS_UP	FULCHER_INFLAMMATORY_RESPONSE_LECTIN_VS_LPS_DN
IFIT5	BLANCO_MELO_HUMAN_PARAINFLUENZA_VIRUS_3_INFECTION_A594_CELLS_UP	BLANCO_MELO_BRONCHIAL_EPITHELIAL_CELLS_INFLUENZA_A_DEL_NS1_INFECTION_UP		BLANCO_MELO_COVID19_SARS_COV_2_INFECTION_CALU3_CELLS_UP		REACTOME_INTERFERON_SIGNALING	BLANCO_MELO_BETA_INTERFERON_TREATED_BRONCHIAL_EPITHELIAL_CELLS_UP	BOSCO_INTERFERON_INDUCED_ANTIVIRAL_MODULE		BROWNE_INTERFERON_RESPONSIVE_GENES	REACTOME_INTERFERON_ALPHA_BETA_SIGNALING	REACTOME_CYTOKINE_SIGNALING_IN_IMMUNE_SYSTEM	BLANCO_MELO_COVID19_SARS_COV_2_INFECTION_A594_ACE2_EXPRESSING_CELLS_UP	FULCHER_INFLAMMATORY_RESPONSE_LECTIN_VS_LPS_DN
TRIM21	BLANCO_MELO_HUMAN_PARAINFLUENZA_VIRUS_3_INFECTION_A594_CELLS_UP	BLANCO_MELO_BRONCHIAL_EPITHELIAL_CELLS_INFLUENZA_A_DEL_NS1_INFECTION_UP		BLANCO_MELO_COVID19_SARS_COV_2_INFECTION_CALU3_CELLS_UP		REACTOME_INTERFERON_SIGNALING	BLANCO_MELO_BETA_INTERFERON_TREATED_BRONCHIAL_EPITHELIAL_CELLS_UP		REACTOME_INTERFERON_GAMMA_SIGNALING	BROWNE_INTERFERON_RESPONSIVE_GENES		REACTOME_CYTOKINE_SIGNALING_IN_IMMUNE_SYSTEM	BLANCO_MELO_COVID19_SARS_COV_2_INFECTION_A594_ACE2_EXPRESSING_CELLS_UP
RTP4	BLANCO_MELO_HUMAN_PARAINFLUENZA_VIRUS_3_INFECTION_A594_CELLS_UP	BLANCO_MELO_BRONCHIAL_EPITHELIAL_CELLS_INFLUENZA_A_DEL_NS1_INFECTION_UP		BLANCO_MELO_COVID19_SARS_COV_2_INFECTION_CALU3_CELLS_UP			BLANCO_MELO_BETA_INTERFERON_TREATED_BRONCHIAL_EPITHELIAL_CELLS_UP
TGM2	BLANCO_MELO_HUMAN_PARAINFLUENZA_VIRUS_3_INFECTION_A594_CELLS_UP	BLANCO_MELO_BRONCHIAL_EPITHELIAL_CELLS_INFLUENZA_A_DEL_NS1_INFECTION_UP			BLANCO_MELO_RESPIRATORY_SYNCYTIAL_VIRUS_INFECTION_A594_CELLS_UP		BLANCO_MELO_BETA_INTERFERON_TREATED_BRONCHIAL_EPITHELIAL_CELLS_UP						BLANCO_MELO_COVID19_SARS_COV_2_INFECTION_A594_ACE2_EXPRESSING_CELLS_UP
ERAP2	BLANCO_MELO_HUMAN_PARAINFLUENZA_VIRUS_3_INFECTION_A594_CELLS_UP	BLANCO_MELO_BRONCHIAL_EPITHELIAL_CELLS_INFLUENZA_A_DEL_NS1_INFECTION_UP			BLANCO_MELO_RESPIRATORY_SYNCYTIAL_VIRUS_INFECTION_A594_CELLS_UP		BLANCO_MELO_BETA_INTERFERON_TREATED_BRONCHIAL_EPITHELIAL_CELLS_UP
IFITM3	BLANCO_MELO_HUMAN_PARAINFLUENZA_VIRUS_3_INFECTION_A594_CELLS_UP	BLANCO_MELO_BRONCHIAL_EPITHELIAL_CELLS_INFLUENZA_A_DEL_NS1_INFECTION_UP				REACTOME_INTERFERON_SIGNALING		BOSCO_INTERFERON_INDUCED_ANTIVIRAL_MODULE			REACTOME_INTERFERON_ALPHA_BETA_SIGNALING	REACTOME_CYTOKINE_SIGNALING_IN_IMMUNE_SYSTEM	BLANCO_MELO_COVID19_SARS_COV_2_INFECTION_A594_ACE2_EXPRESSING_CELLS_UP	FULCHER_INFLAMMATORY_RESPONSE_LECTIN_VS_LPS_DN
GBP4	BLANCO_MELO_HUMAN_PARAINFLUENZA_VIRUS_3_INFECTION_A594_CELLS_UP		SANA_RESPONSE_TO_IFNG_UP	BLANCO_MELO_COVID19_SARS_COV_2_INFECTION_CALU3_CELLS_UP	BLANCO_MELO_RESPIRATORY_SYNCYTIAL_VIRUS_INFECTION_A594_CELLS_UP	REACTOME_INTERFERON_SIGNALING		BOSCO_INTERFERON_INDUCED_ANTIVIRAL_MODULE	REACTOME_INTERFERON_GAMMA_SIGNALING			REACTOME_CYTOKINE_SIGNALING_IN_IMMUNE_SYSTEM	BLANCO_MELO_COVID19_SARS_COV_2_INFECTION_A594_ACE2_EXPRESSING_CELLS_UP
CD274	BLANCO_MELO_HUMAN_PARAINFLUENZA_VIRUS_3_INFECTION_A594_CELLS_UP		SANA_RESPONSE_TO_IFNG_UP	BLANCO_MELO_COVID19_SARS_COV_2_INFECTION_CALU3_CELLS_UP	BLANCO_MELO_RESPIRATORY_SYNCYTIAL_VIRUS_INFECTION_A594_CELLS_UP		BLANCO_MELO_BETA_INTERFERON_TREATED_BRONCHIAL_EPITHELIAL_CELLS_UP	BOSCO_INTERFERON_INDUCED_ANTIVIRAL_MODULE					BLANCO_MELO_COVID19_SARS_COV_2_INFECTION_A594_ACE2_EXPRESSING_CELLS_UP
DDX60	BLANCO_MELO_HUMAN_PARAINFLUENZA_VIRUS_3_INFECTION_A594_CELLS_UP		SANA_RESPONSE_TO_IFNG_UP	BLANCO_MELO_COVID19_SARS_COV_2_INFECTION_CALU3_CELLS_UP	BLANCO_MELO_RESPIRATORY_SYNCYTIAL_VIRUS_INFECTION_A594_CELLS_UP			BOSCO_INTERFERON_INDUCED_ANTIVIRAL_MODULE					BLANCO_MELO_COVID19_SARS_COV_2_INFECTION_A594_ACE2_EXPRESSING_CELLS_UP
SERPING1	BLANCO_MELO_HUMAN_PARAINFLUENZA_VIRUS_3_INFECTION_A594_CELLS_UP		SANA_RESPONSE_TO_IFNG_UP		BLANCO_MELO_RESPIRATORY_SYNCYTIAL_VIRUS_INFECTION_A594_CELLS_UP								BLANCO_MELO_COVID19_SARS_COV_2_INFECTION_A594_ACE2_EXPRESSING_CELLS_UP	FULCHER_INFLAMMATORY_RESPONSE_LECTIN_VS_LPS_DN
GBP5	BLANCO_MELO_HUMAN_PARAINFLUENZA_VIRUS_3_INFECTION_A594_CELLS_UP			BLANCO_MELO_COVID19_SARS_COV_2_INFECTION_CALU3_CELLS_UP	BLANCO_MELO_RESPIRATORY_SYNCYTIAL_VIRUS_INFECTION_A594_CELLS_UP	REACTOME_INTERFERON_SIGNALING	BLANCO_MELO_BETA_INTERFERON_TREATED_BRONCHIAL_EPITHELIAL_CELLS_UP		REACTOME_INTERFERON_GAMMA_SIGNALING			REACTOME_CYTOKINE_SIGNALING_IN_IMMUNE_SYSTEM
RUFY4	BLANCO_MELO_HUMAN_PARAINFLUENZA_VIRUS_3_INFECTION_A594_CELLS_UP
IFI35		BLANCO_MELO_BRONCHIAL_EPITHELIAL_CELLS_INFLUENZA_A_DEL_NS1_INFECTION_UP	SANA_RESPONSE_TO_IFNG_UP	BLANCO_MELO_COVID19_SARS_COV_2_INFECTION_CALU3_CELLS_UP		REACTOME_INTERFERON_SIGNALING		BOSCO_INTERFERON_INDUCED_ANTIVIRAL_MODULE		BROWNE_INTERFERON_RESPONSIVE_GENES	REACTOME_INTERFERON_ALPHA_BETA_SIGNALING	REACTOME_CYTOKINE_SIGNALING_IN_IMMUNE_SYSTEM
APOL2		BLANCO_MELO_BRONCHIAL_EPITHELIAL_CELLS_INFLUENZA_A_DEL_NS1_INFECTION_UP	SANA_RESPONSE_TO_IFNG_UP		BLANCO_MELO_RESPIRATORY_SYNCYTIAL_VIRUS_INFECTION_A594_CELLS_UP		BLANCO_MELO_BETA_INTERFERON_TREATED_BRONCHIAL_EPITHELIAL_CELLS_UP
PLAAT4		BLANCO_MELO_BRONCHIAL_EPITHELIAL_CELLS_INFLUENZA_A_DEL_NS1_INFECTION_UP	SANA_RESPONSE_TO_IFNG_UP				BLANCO_MELO_BETA_INTERFERON_TREATED_BRONCHIAL_EPITHELIAL_CELLS_UP			BROWNE_INTERFERON_RESPONSIVE_GENES
SPRY2		BLANCO_MELO_BRONCHIAL_EPITHELIAL_CELLS_INFLUENZA_A_DEL_NS1_INFECTION_UP		BLANCO_MELO_COVID19_SARS_COV_2_INFECTION_CALU3_CELLS_UP			BLANCO_MELO_BETA_INTERFERON_TREATED_BRONCHIAL_EPITHELIAL_CELLS_UP
SOCS3		BLANCO_MELO_BRONCHIAL_EPITHELIAL_CELLS_INFLUENZA_A_DEL_NS1_INFECTION_UP			BLANCO_MELO_RESPIRATORY_SYNCYTIAL_VIRUS_INFECTION_A594_CELLS_UP	REACTOME_INTERFERON_SIGNALING	BLANCO_MELO_BETA_INTERFERON_TREATED_BRONCHIAL_EPITHELIAL_CELLS_UP		REACTOME_INTERFERON_GAMMA_SIGNALING		REACTOME_INTERFERON_ALPHA_BETA_SIGNALING	REACTOME_CYTOKINE_SIGNALING_IN_IMMUNE_SYSTEM	BLANCO_MELO_COVID19_SARS_COV_2_INFECTION_A594_ACE2_EXPRESSING_CELLS_UP	FULCHER_INFLAMMATORY_RESPONSE_LECTIN_VS_LPS_DN
HLA-H		BLANCO_MELO_BRONCHIAL_EPITHELIAL_CELLS_INFLUENZA_A_DEL_NS1_INFECTION_UP				REACTOME_INTERFERON_SIGNALING			REACTOME_INTERFERON_GAMMA_SIGNALING		REACTOME_INTERFERON_ALPHA_BETA_SIGNALING	REACTOME_CYTOKINE_SIGNALING_IN_IMMUNE_SYSTEM
CASP7		BLANCO_MELO_BRONCHIAL_EPITHELIAL_CELLS_INFLUENZA_A_DEL_NS1_INFECTION_UP					BLANCO_MELO_BETA_INTERFERON_TREATED_BRONCHIAL_EPITHELIAL_CELLS_UP
FBXO6		BLANCO_MELO_BRONCHIAL_EPITHELIAL_CELLS_INFLUENZA_A_DEL_NS1_INFECTION_UP
CARD17		BLANCO_MELO_BRONCHIAL_EPITHELIAL_CELLS_INFLUENZA_A_DEL_NS1_INFECTION_UP
BTN3A2		BLANCO_MELO_BRONCHIAL_EPITHELIAL_CELLS_INFLUENZA_A_DEL_NS1_INFECTION_UP
GBP1P1				BLANCO_MELO_COVID19_SARS_COV_2_INFECTION_CALU3_CELLS_UP
FCGR1A						REACTOME_INTERFERON_SIGNALING			REACTOME_INTERFERON_GAMMA_SIGNALING			REACTOME_CYTOKINE_SIGNALING_IN_IMMUNE_SYSTEM		FULCHER_INFLAMMATORY_RESPONSE_LECTIN_VS_LPS_DN
GBP6						REACTOME_INTERFERON_SIGNALING			REACTOME_INTERFERON_GAMMA_SIGNALING			REACTOME_CYTOKINE_SIGNALING_IN_IMMUNE_SYSTEM
MOV10								BOSCO_INTERFERON_INDUCED_ANTIVIRAL_MODULE
C2													BLANCO_MELO_COVID19_SARS_COV_2_INFECTION_A594_ACE2_EXPRESSING_CELLS_UP	FULCHER_INFLAMMATORY_RESPONSE_LECTIN_VS_LPS_DN
NEDD4L													BLANCO_MELO_COVID19_SARS_COV_2_INFECTION_A594_ACE2_EXPRESSING_CELLS_UP
KLF11													BLANCO_MELO_COVID19_SARS_COV_2_INFECTION_A594_ACE2_EXPRESSING_CELLS_UP
PRR11														FULCHER_INFLAMMATORY_RESPONSE_LECTIN_VS_LPS_DN
DNASE2														FULCHER_INFLAMMATORY_RESPONSE_LECTIN_VS_LPS_DN
NBPF1														FULCHER_INFLAMMATORY_RESPONSE_LECTIN_VS_LPS_DN

## Sheet: C2 sorted pathways
SARS-CoV-2			Influenza			Virus infection
BLANCO_MELO_COVID19_SARS_COV_2_INFECTION_CALU3_CELLS_UP	BLANCO_MELO_COVID19_SARS_COV_2_INFECTION_A594_ACE2_EXPRESSING_CELLS_UP		BLANCO_MELO_HUMAN_PARAINFLUENZA_VIRUS_3_INFECTION_A594_CELLS_UP	BLANCO_MELO_BRONCHIAL_EPITHELIAL_CELLS_INFLUENZA_A_DEL_NS1_INFECTION_UP		BLANCO_MELO_RESPIRATORY_SYNCYTIAL_VIRUS_INFECTION_A594_CELLS_UP	BOSCO_INTERFERON_INDUCED_ANTIVIRAL_MODULE
GBP1	BATF2		GBP1	GBP1		GBP1	OAS2
SAMHD1	STAT2		SAMHD1	SAMHD1		SAMHD1	APOL1
UBE2L6	APOL6		UBE2L6	UBE2L6		UBE2L6	XAF1
STAT1	DHX58		STAT1	STAT1		STAT1	STAT2
BATF2	IFIT5		BATF2	BATF2		BATF2	APOL6
DTX3L	TRIM21		DTX3L	DTX3L		DTX3L	DHX58
APOL3	TGM2		APOL3	APOL3		APOL3	IFIT5
OAS2	IFITM3		OAS2	OAS2		GBP3	IFITM3
ETV7	GBP4		ETV7	ETV7		APOL1	GBP4
XAF1	CD274		GBP3	GBP3		XAF1	CD274
STAT2	DDX60		APOL1	APOL1		STAT2	DDX60
APOL6	SERPING1		XAF1	XAF1		APOL6	IFI35
DHX58	SOCS3		STAT2	STAT2		DHX58	MOV10
IFIT5	C2		APOL6	APOL6		TGM2
TRIM21	NEDD4L		DHX58	DHX58		ERAP2
RTP4	KLF11		IFIT5	IFIT5		GBP4
GBP4			TRIM21	TRIM21		CD274
CD274			RTP4	RTP4		DDX60
DDX60			TGM2	TGM2		SERPING1
GBP5			ERAP2	ERAP2		GBP5
IFI35			IFITM3	IFITM3		APOL2
SPRY2			GBP4	APOL2		SOCS3
GBP1P1			CD274	PLAAT4
			DDX60	SPRY2
			SERPING1	SOCS3
			GBP5	HLA-H
			RUFY4	CASP7
				FBXO6
				CARD17
				BTN3A2

## Sheet: GSEA-C5
Gene Set Name	# Genes in Gene Set (K)	Description	# Genes in Overlap (k)	k/K	p-value	FDR q-value
GOBP_DEFENSE_RESPONSE_TO_OTHER_ORGANISM	1208	Reactions triggered in response to the presence of another organism that act to protect the cell or organism from damage caused by that organism. [GOC:dos]	30	0.0248	2.41e-24	1.29e-20
GOBP_RESPONSE_TO_BIOTIC_STIMULUS	1606	Any process that results in a change in state or activity of a cell or an organism (in terms of movement, secretion, enzyme production, gene expression, etc.) as a result of a biotic stimulus, a stimulus caused or produced by a living organism. [GOC:hb]	33	0.0205	2.54e-24	1.29e-20
GOBP_DEFENSE_RESPONSE	1790	Reactions, triggered in response to the presence of a foreign body or the occurrence of an injury, which result in restriction of damage to the organism attacked or prevention/recovery from the infection caused by the attack. [GOC:go_curators]	33	0.0184	7.41e-23	2.51e-19
GOBP_INNATE_IMMUNE_RESPONSE	997	Innate immune responses are defense responses mediated by germline encoded components that directly recognize components of potential pathogens. [GO_REF:0000022, GOC:add, GOC:ebc, GOC:mtg_sensu]	26	0.0261	1.53e-21	3.91e-18
GOBP_DEFENSE_RESPONSE_TO_VIRUS	260	Reactions triggered in response to the presence of a virus that act to protect the cell or organism. [GOC:ai]	14	0.0538	3.83e-16	7.81e-13
GOBP_RESPONSE_TO_VIRUS	358	Any process that results in a change in state or activity of a cell or an organism (in terms of movement, secretion, enzyme production, gene expression, etc.) as a result of a stimulus from a virus. [GOC:hb]	15	0.0419	1.29e-15	2.19e-12
GOBP_IMMUNE_EFFECTOR_PROCESS	1296	Any process of the immune system that can potentially contribute to an immune response. [GO_REF:0000022, GOC:add, ISBN:0781735149]	23	0.0177	1.97e-15	2.87e-12
GOBP_RESPONSE_TO_INTERFERON_GAMMA	196	Any process that results in a change in state or activity of a cell or an organism (in terms of movement, secretion, enzyme production, gene expression, etc.) as a result of an interferon-gamma stimulus. Interferon-gamma is also known as type II interferon. [GOC:add, ISBN:0126896631, PMID:15546383]	12	0.0612	1.2e-14	1.53e-11
GOBP_REGULATION_OF_IMMUNE_SYSTEM_PROCESS	1593	Any process that modulates the frequency, rate, or extent of an immune system process. [GOC:add]	23	0.0144	1.5e-13	1.7e-10
GOBP_RESPONSE_TO_CYTOKINE	1188	Any process that results in a change in state or activity of a cell or an organism (in terms of movement, secretion, enzyme production, gene expression, etc.) as a result of a cytokine stimulus. [GOC:sl]	19	0.016	4.86e-12	4.95e-09
GOBP_REGULATION_OF_IMMUNE_RESPONSE	993	Any process that modulates the frequency, rate or extent of the immune response, the immunological reaction of an organism to an immunogenic stimulus. [GOC:ai]	17	0.0171	2.63e-11	2.43e-08
GOBP_RESPONSE_TO_TYPE_I_INTERFERON	101	Any process that results in a change in state or activity of a cell or an organism (in terms of movement, secretion, enzyme production, gene expression, etc.) as a result of a type I interferon stimulus. Type I interferons include the interferon-alpha, beta, delta, episilon, zeta, kappa, tau, and omega gene families. [GOC:add, ISBN:0126896631, PMID:15546383, PMID:16681834]	8	0.0792	4.8e-11	4.08e-08
GOBP_REGULATION_OF_RESPONSE_TO_BIOTIC_STIMULUS	418	Any process that modulates the frequency, rate, or extent of a response to biotic stimulus. [GOC:add]	12	0.0287	8.78e-11	6.88e-08
GOBP_INTERFERON_GAMMA_MEDIATED_SIGNALING_PATHWAY	91	A series of molecular signals initiated by the binding of interferon-gamma to a receptor on the surface of a cell, and ending with regulation of a downstream cellular process, e.g. transcription. Interferon gamma is the only member of the type II interferon found so far. [GOC:add, GOC:dph, GOC:signaling]	7	0.0769	1.01e-09	7.35e-07
GOBP_POSITIVE_REGULATION_OF_IMMUNE_SYSTEM_PROCESS	1050	Any process that activates or increases the frequency, rate, or extent of an immune system process. [GOC:add]	14	0.0133	4.14e-08	2.81e-05
GOBP_REGULATION_OF_IMMUNE_EFFECTOR_PROCESS	464	Any process that modulates the frequency, rate, or extent of an immune effector process. [GOC:add]	10	0.0216	5.37e-08	3.42e-05
GOBP_CYTOKINE_MEDIATED_SIGNALING_PATHWAY	803	A series of molecular signals initiated by the binding of a cytokine to a receptor on the surface of a cell, and ending with regulation of a downstream cellular process, e.g. transcription. [GOC:mah, GOC:signaling, PMID:19295629]	12	0.0149	1.25e-07	7.5e-05
GOBP_BIOLOGICAL_PROCESS_INVOLVED_IN_SYMBIOTIC_INTERACTION	997	A process carried out by gene products in an organism that enable the organism to engage in a symbiotic relationship, a more or less intimate association, with another organism. The various forms of symbiosis include parasitism, in which the association is disadvantageous or destructive to one of the organisms; mutualism, in which the association is advantageous, or often necessary to one or both…	13	0.013	1.71e-07	9.68e-05
GOBP_NEGATIVE_REGULATION_OF_IMMUNE_SYSTEM_PROCESS	403	Any process that stops, prevents, or reduces the frequency, rate, or extent of an immune system process. [GOC:add]	9	0.0223	1.92e-07	0.000103
GOBP_REGULATION_OF_DEFENSE_RESPONSE	692	Any process that modulates the frequency, rate or extent of a defense response. [GOC:mah]	11	0.0159	2.38e-07	0.000121
Gene Symbol	GOBP_DEFENSE_RESPONSE_TO_OTHER_ORGANISM	GOBP_RESPONSE_TO_BIOTIC_STIMULUS	GOBP_DEFENSE_RESPONSE	GOBP_INNATE_IMMUNE_RESPONSE	GOBP_DEFENSE_RESPONSE_TO_VIRUS	GOBP_RESPONSE_TO_VIRUS	GOBP_IMMUNE_EFFECTOR_PROCESS	GOBP_RESPONSE_TO_INTERFERON_GAMMA	GOBP_REGULATION_OF_IMMUNE_SYSTEM_PROCESS	GOBP_RESPONSE_TO_CYTOKINE	GOBP_REGULATION_OF_IMMUNE_RESPONSE	GOBP_RESPONSE_TO_TYPE_I_INTERFERON	GOBP_REGULATION_OF_RESPONSE_TO_BIOTIC_STIMULUS	GOBP_INTERFERON_GAMMA_MEDIATED_SIGNALING_PATHWAY	GOBP_POSITIVE_REGULATION_OF_IMMUNE_SYSTEM_PROCESS	GOBP_REGULATION_OF_IMMUNE_EFFECTOR_PROCESS	GOBP_CYTOKINE_MEDIATED_SIGNALING_PATHWAY	GOBP_BIOLOGICAL_PROCESS_INVOLVED_IN_SYMBIOTIC_INTERACTION	GOBP_NEGATIVE_REGULATION_OF_IMMUNE_SYSTEM_PROCESS	GOBP_REGULATION_OF_DEFENSE_RESPONSE
STAT1	GOBP_DEFENSE_RESPONSE_TO_OTHER_ORGANISM	GOBP_RESPONSE_TO_BIOTIC_STIMULUS	GOBP_DEFENSE_RESPONSE	GOBP_INNATE_IMMUNE_RESPONSE	GOBP_DEFENSE_RESPONSE_TO_VIRUS	GOBP_RESPONSE_TO_VIRUS	GOBP_IMMUNE_EFFECTOR_PROCESS	GOBP_RESPONSE_TO_INTERFERON_GAMMA	GOBP_REGULATION_OF_IMMUNE_SYSTEM_PROCESS	GOBP_RESPONSE_TO_CYTOKINE	GOBP_REGULATION_OF_IMMUNE_RESPONSE	GOBP_RESPONSE_TO_TYPE_I_INTERFERON	GOBP_REGULATION_OF_RESPONSE_TO_BIOTIC_STIMULUS	GOBP_INTERFERON_GAMMA_MEDIATED_SIGNALING_PATHWAY		GOBP_REGULATION_OF_IMMUNE_EFFECTOR_PROCESS	GOBP_CYTOKINE_MEDIATED_SIGNALING_PATHWAY	GOBP_BIOLOGICAL_PROCESS_INVOLVED_IN_SYMBIOTIC_INTERACTION		GOBP_REGULATION_OF_DEFENSE_RESPONSE
GBP1	GOBP_DEFENSE_RESPONSE_TO_OTHER_ORGANISM	GOBP_RESPONSE_TO_BIOTIC_STIMULUS	GOBP_DEFENSE_RESPONSE	GOBP_INNATE_IMMUNE_RESPONSE	GOBP_DEFENSE_RESPONSE_TO_VIRUS	GOBP_RESPONSE_TO_VIRUS	GOBP_IMMUNE_EFFECTOR_PROCESS	GOBP_RESPONSE_TO_INTERFERON_GAMMA	GOBP_REGULATION_OF_IMMUNE_SYSTEM_PROCESS	GOBP_RESPONSE_TO_CYTOKINE	GOBP_REGULATION_OF_IMMUNE_RESPONSE			GOBP_INTERFERON_GAMMA_MEDIATED_SIGNALING_PATHWAY	GOBP_POSITIVE_REGULATION_OF_IMMUNE_SYSTEM_PROCESS		GOBP_CYTOKINE_MEDIATED_SIGNALING_PATHWAY		GOBP_NEGATIVE_REGULATION_OF_IMMUNE_SYSTEM_PROCESS
OAS2	GOBP_DEFENSE_RESPONSE_TO_OTHER_ORGANISM	GOBP_RESPONSE_TO_BIOTIC_STIMULUS	GOBP_DEFENSE_RESPONSE	GOBP_INNATE_IMMUNE_RESPONSE	GOBP_DEFENSE_RESPONSE_TO_VIRUS	GOBP_RESPONSE_TO_VIRUS	GOBP_IMMUNE_EFFECTOR_PROCESS	GOBP_RESPONSE_TO_INTERFERON_GAMMA		GOBP_RESPONSE_TO_CYTOKINE		GOBP_RESPONSE_TO_TYPE_I_INTERFERON		GOBP_INTERFERON_GAMMA_MEDIATED_SIGNALING_PATHWAY			GOBP_CYTOKINE_MEDIATED_SIGNALING_PATHWAY	GOBP_BIOLOGICAL_PROCESS_INVOLVED_IN_SYMBIOTIC_INTERACTION
IFITM3	GOBP_DEFENSE_RESPONSE_TO_OTHER_ORGANISM	GOBP_RESPONSE_TO_BIOTIC_STIMULUS	GOBP_DEFENSE_RESPONSE	GOBP_INNATE_IMMUNE_RESPONSE	GOBP_DEFENSE_RESPONSE_TO_VIRUS	GOBP_RESPONSE_TO_VIRUS	GOBP_IMMUNE_EFFECTOR_PROCESS	GOBP_RESPONSE_TO_INTERFERON_GAMMA		GOBP_RESPONSE_TO_CYTOKINE		GOBP_RESPONSE_TO_TYPE_I_INTERFERON					GOBP_CYTOKINE_MEDIATED_SIGNALING_PATHWAY	GOBP_BIOLOGICAL_PROCESS_INVOLVED_IN_SYMBIOTIC_INTERACTION
GBP3	GOBP_DEFENSE_RESPONSE_TO_OTHER_ORGANISM	GOBP_RESPONSE_TO_BIOTIC_STIMULUS	GOBP_DEFENSE_RESPONSE	GOBP_INNATE_IMMUNE_RESPONSE	GOBP_DEFENSE_RESPONSE_TO_VIRUS	GOBP_RESPONSE_TO_VIRUS	GOBP_IMMUNE_EFFECTOR_PROCESS	GOBP_RESPONSE_TO_INTERFERON_GAMMA		GOBP_RESPONSE_TO_CYTOKINE
SAMHD1	GOBP_DEFENSE_RESPONSE_TO_OTHER_ORGANISM	GOBP_RESPONSE_TO_BIOTIC_STIMULUS	GOBP_DEFENSE_RESPONSE	GOBP_INNATE_IMMUNE_RESPONSE	GOBP_DEFENSE_RESPONSE_TO_VIRUS	GOBP_RESPONSE_TO_VIRUS	GOBP_IMMUNE_EFFECTOR_PROCESS		GOBP_REGULATION_OF_IMMUNE_SYSTEM_PROCESS	GOBP_RESPONSE_TO_CYTOKINE	GOBP_REGULATION_OF_IMMUNE_RESPONSE	GOBP_RESPONSE_TO_TYPE_I_INTERFERON	GOBP_REGULATION_OF_RESPONSE_TO_BIOTIC_STIMULUS				GOBP_CYTOKINE_MEDIATED_SIGNALING_PATHWAY	GOBP_BIOLOGICAL_PROCESS_INVOLVED_IN_SYMBIOTIC_INTERACTION	GOBP_NEGATIVE_REGULATION_OF_IMMUNE_SYSTEM_PROCESS	GOBP_REGULATION_OF_DEFENSE_RESPONSE
DHX58	GOBP_DEFENSE_RESPONSE_TO_OTHER_ORGANISM	GOBP_RESPONSE_TO_BIOTIC_STIMULUS	GOBP_DEFENSE_RESPONSE	GOBP_INNATE_IMMUNE_RESPONSE	GOBP_DEFENSE_RESPONSE_TO_VIRUS	GOBP_RESPONSE_TO_VIRUS	GOBP_IMMUNE_EFFECTOR_PROCESS		GOBP_REGULATION_OF_IMMUNE_SYSTEM_PROCESS		GOBP_REGULATION_OF_IMMUNE_RESPONSE		GOBP_REGULATION_OF_RESPONSE_TO_BIOTIC_STIMULUS		GOBP_POSITIVE_REGULATION_OF_IMMUNE_SYSTEM_PROCESS	GOBP_REGULATION_OF_IMMUNE_EFFECTOR_PROCESS		GOBP_BIOLOGICAL_PROCESS_INVOLVED_IN_SYMBIOTIC_INTERACTION	GOBP_NEGATIVE_REGULATION_OF_IMMUNE_SYSTEM_PROCESS	GOBP_REGULATION_OF_DEFENSE_RESPONSE
DDX60	GOBP_DEFENSE_RESPONSE_TO_OTHER_ORGANISM	GOBP_RESPONSE_TO_BIOTIC_STIMULUS	GOBP_DEFENSE_RESPONSE	GOBP_INNATE_IMMUNE_RESPONSE	GOBP_DEFENSE_RESPONSE_TO_VIRUS	GOBP_RESPONSE_TO_VIRUS	GOBP_IMMUNE_EFFECTOR_PROCESS		GOBP_REGULATION_OF_IMMUNE_SYSTEM_PROCESS				GOBP_REGULATION_OF_RESPONSE_TO_BIOTIC_STIMULUS		GOBP_POSITIVE_REGULATION_OF_IMMUNE_SYSTEM_PROCESS	GOBP_REGULATION_OF_IMMUNE_EFFECTOR_PROCESS
DTX3L	GOBP_DEFENSE_RESPONSE_TO_OTHER_ORGANISM	GOBP_RESPONSE_TO_BIOTIC_STIMULUS	GOBP_DEFENSE_RESPONSE	GOBP_INNATE_IMMUNE_RESPONSE	GOBP_DEFENSE_RESPONSE_TO_VIRUS	GOBP_RESPONSE_TO_VIRUS	GOBP_IMMUNE_EFFECTOR_PROCESS		GOBP_REGULATION_OF_IMMUNE_SYSTEM_PROCESS				GOBP_REGULATION_OF_RESPONSE_TO_BIOTIC_STIMULUS			GOBP_REGULATION_OF_IMMUNE_EFFECTOR_PROCESS		GOBP_BIOLOGICAL_PROCESS_INVOLVED_IN_SYMBIOTIC_INTERACTION		GOBP_REGULATION_OF_DEFENSE_RESPONSE
STAT2	GOBP_DEFENSE_RESPONSE_TO_OTHER_ORGANISM	GOBP_RESPONSE_TO_BIOTIC_STIMULUS	GOBP_DEFENSE_RESPONSE	GOBP_INNATE_IMMUNE_RESPONSE	GOBP_DEFENSE_RESPONSE_TO_VIRUS	GOBP_RESPONSE_TO_VIRUS	GOBP_IMMUNE_EFFECTOR_PROCESS			GOBP_RESPONSE_TO_CYTOKINE		GOBP_RESPONSE_TO_TYPE_I_INTERFERON					GOBP_CYTOKINE_MEDIATED_SIGNALING_PATHWAY	GOBP_BIOLOGICAL_PROCESS_INVOLVED_IN_SYMBIOTIC_INTERACTION
IFIT5	GOBP_DEFENSE_RESPONSE_TO_OTHER_ORGANISM	GOBP_RESPONSE_TO_BIOTIC_STIMULUS	GOBP_DEFENSE_RESPONSE	GOBP_INNATE_IMMUNE_RESPONSE	GOBP_DEFENSE_RESPONSE_TO_VIRUS	GOBP_RESPONSE_TO_VIRUS	GOBP_IMMUNE_EFFECTOR_PROCESS											GOBP_BIOLOGICAL_PROCESS_INVOLVED_IN_SYMBIOTIC_INTERACTION
HLA-H	GOBP_DEFENSE_RESPONSE_TO_OTHER_ORGANISM	GOBP_RESPONSE_TO_BIOTIC_STIMULUS	GOBP_DEFENSE_RESPONSE	GOBP_INNATE_IMMUNE_RESPONSE			GOBP_IMMUNE_EFFECTOR_PROCESS	GOBP_RESPONSE_TO_INTERFERON_GAMMA	GOBP_REGULATION_OF_IMMUNE_SYSTEM_PROCESS	GOBP_RESPONSE_TO_CYTOKINE	GOBP_REGULATION_OF_IMMUNE_RESPONSE	GOBP_RESPONSE_TO_TYPE_I_INTERFERON		GOBP_INTERFERON_GAMMA_MEDIATED_SIGNALING_PATHWAY	GOBP_POSITIVE_REGULATION_OF_IMMUNE_SYSTEM_PROCESS	GOBP_REGULATION_OF_IMMUNE_EFFECTOR_PROCESS	GOBP_CYTOKINE_MEDIATED_SIGNALING_PATHWAY
FCGR1A	GOBP_DEFENSE_RESPONSE_TO_OTHER_ORGANISM	GOBP_RESPONSE_TO_BIOTIC_STIMULUS	GOBP_DEFENSE_RESPONSE	GOBP_INNATE_IMMUNE_RESPONSE			GOBP_IMMUNE_EFFECTOR_PROCESS	GOBP_RESPONSE_TO_INTERFERON_GAMMA	GOBP_REGULATION_OF_IMMUNE_SYSTEM_PROCESS	GOBP_RESPONSE_TO_CYTOKINE	GOBP_REGULATION_OF_IMMUNE_RESPONSE			GOBP_INTERFERON_GAMMA_MEDIATED_SIGNALING_PATHWAY	GOBP_POSITIVE_REGULATION_OF_IMMUNE_SYSTEM_PROCESS		GOBP_CYTOKINE_MEDIATED_SIGNALING_PATHWAY
IFI35	GOBP_DEFENSE_RESPONSE_TO_OTHER_ORGANISM	GOBP_RESPONSE_TO_BIOTIC_STIMULUS	GOBP_DEFENSE_RESPONSE	GOBP_INNATE_IMMUNE_RESPONSE			GOBP_IMMUNE_EFFECTOR_PROCESS		GOBP_REGULATION_OF_IMMUNE_SYSTEM_PROCESS	GOBP_RESPONSE_TO_CYTOKINE	GOBP_REGULATION_OF_IMMUNE_RESPONSE	GOBP_RESPONSE_TO_TYPE_I_INTERFERON	GOBP_REGULATION_OF_RESPONSE_TO_BIOTIC_STIMULUS		GOBP_POSITIVE_REGULATION_OF_IMMUNE_SYSTEM_PROCESS		GOBP_CYTOKINE_MEDIATED_SIGNALING_PATHWAY			GOBP_REGULATION_OF_DEFENSE_RESPONSE
SERPING1	GOBP_DEFENSE_RESPONSE_TO_OTHER_ORGANISM	GOBP_RESPONSE_TO_BIOTIC_STIMULUS	GOBP_DEFENSE_RESPONSE	GOBP_INNATE_IMMUNE_RESPONSE			GOBP_IMMUNE_EFFECTOR_PROCESS		GOBP_REGULATION_OF_IMMUNE_SYSTEM_PROCESS		GOBP_REGULATION_OF_IMMUNE_RESPONSE		GOBP_REGULATION_OF_RESPONSE_TO_BIOTIC_STIMULUS		GOBP_POSITIVE_REGULATION_OF_IMMUNE_SYSTEM_PROCESS	GOBP_REGULATION_OF_IMMUNE_EFFECTOR_PROCESS			GOBP_NEGATIVE_REGULATION_OF_IMMUNE_SYSTEM_PROCESS	GOBP_REGULATION_OF_DEFENSE_RESPONSE
C1QA	GOBP_DEFENSE_RESPONSE_TO_OTHER_ORGANISM	GOBP_RESPONSE_TO_BIOTIC_STIMULUS	GOBP_DEFENSE_RESPONSE	GOBP_INNATE_IMMUNE_RESPONSE			GOBP_IMMUNE_EFFECTOR_PROCESS		GOBP_REGULATION_OF_IMMUNE_SYSTEM_PROCESS		GOBP_REGULATION_OF_IMMUNE_RESPONSE				GOBP_POSITIVE_REGULATION_OF_IMMUNE_SYSTEM_PROCESS	GOBP_REGULATION_OF_IMMUNE_EFFECTOR_PROCESS		GOBP_BIOLOGICAL_PROCESS_INVOLVED_IN_SYMBIOTIC_INTERACTION
C1QC	GOBP_DEFENSE_RESPONSE_TO_OTHER_ORGANISM	GOBP_RESPONSE_TO_BIOTIC_STIMULUS	GOBP_DEFENSE_RESPONSE	GOBP_INNATE_IMMUNE_RESPONSE			GOBP_IMMUNE_EFFECTOR_PROCESS		GOBP_REGULATION_OF_IMMUNE_SYSTEM_PROCESS		GOBP_REGULATION_OF_IMMUNE_RESPONSE				GOBP_POSITIVE_REGULATION_OF_IMMUNE_SYSTEM_PROCESS	GOBP_REGULATION_OF_IMMUNE_EFFECTOR_PROCESS			GOBP_NEGATIVE_REGULATION_OF_IMMUNE_SYSTEM_PROCESS
C2	GOBP_DEFENSE_RESPONSE_TO_OTHER_ORGANISM	GOBP_RESPONSE_TO_BIOTIC_STIMULUS	GOBP_DEFENSE_RESPONSE	GOBP_INNATE_IMMUNE_RESPONSE			GOBP_IMMUNE_EFFECTOR_PROCESS		GOBP_REGULATION_OF_IMMUNE_SYSTEM_PROCESS		GOBP_REGULATION_OF_IMMUNE_RESPONSE				GOBP_POSITIVE_REGULATION_OF_IMMUNE_SYSTEM_PROCESS	GOBP_REGULATION_OF_IMMUNE_EFFECTOR_PROCESS
TRIM21	GOBP_DEFENSE_RESPONSE_TO_OTHER_ORGANISM	GOBP_RESPONSE_TO_BIOTIC_STIMULUS	GOBP_DEFENSE_RESPONSE	GOBP_INNATE_IMMUNE_RESPONSE				GOBP_RESPONSE_TO_INTERFERON_GAMMA	GOBP_REGULATION_OF_IMMUNE_SYSTEM_PROCESS	GOBP_RESPONSE_TO_CYTOKINE	GOBP_REGULATION_OF_IMMUNE_RESPONSE		GOBP_REGULATION_OF_RESPONSE_TO_BIOTIC_STIMULUS	GOBP_INTERFERON_GAMMA_MEDIATED_SIGNALING_PATHWAY			GOBP_CYTOKINE_MEDIATED_SIGNALING_PATHWAY	GOBP_BIOLOGICAL_PROCESS_INVOLVED_IN_SYMBIOTIC_INTERACTION	GOBP_NEGATIVE_REGULATION_OF_IMMUNE_SYSTEM_PROCESS	GOBP_REGULATION_OF_DEFENSE_RESPONSE
SOCS3	GOBP_DEFENSE_RESPONSE_TO_OTHER_ORGANISM	GOBP_RESPONSE_TO_BIOTIC_STIMULUS	GOBP_DEFENSE_RESPONSE	GOBP_INNATE_IMMUNE_RESPONSE				GOBP_RESPONSE_TO_INTERFERON_GAMMA	GOBP_REGULATION_OF_IMMUNE_SYSTEM_PROCESS	GOBP_RESPONSE_TO_CYTOKINE	GOBP_REGULATION_OF_IMMUNE_RESPONSE		GOBP_REGULATION_OF_RESPONSE_TO_BIOTIC_STIMULUS	GOBP_INTERFERON_GAMMA_MEDIATED_SIGNALING_PATHWAY			GOBP_CYTOKINE_MEDIATED_SIGNALING_PATHWAY			GOBP_REGULATION_OF_DEFENSE_RESPONSE
GBP5	GOBP_DEFENSE_RESPONSE_TO_OTHER_ORGANISM	GOBP_RESPONSE_TO_BIOTIC_STIMULUS	GOBP_DEFENSE_RESPONSE	GOBP_INNATE_IMMUNE_RESPONSE				GOBP_RESPONSE_TO_INTERFERON_GAMMA	GOBP_REGULATION_OF_IMMUNE_SYSTEM_PROCESS	GOBP_RESPONSE_TO_CYTOKINE	GOBP_REGULATION_OF_IMMUNE_RESPONSE		GOBP_REGULATION_OF_RESPONSE_TO_BIOTIC_STIMULUS		GOBP_POSITIVE_REGULATION_OF_IMMUNE_SYSTEM_PROCESS					GOBP_REGULATION_OF_DEFENSE_RESPONSE
GBP4	GOBP_DEFENSE_RESPONSE_TO_OTHER_ORGANISM	GOBP_RESPONSE_TO_BIOTIC_STIMULUS	GOBP_DEFENSE_RESPONSE	GOBP_INNATE_IMMUNE_RESPONSE				GOBP_RESPONSE_TO_INTERFERON_GAMMA		GOBP_RESPONSE_TO_CYTOKINE
GBP6	GOBP_DEFENSE_RESPONSE_TO_OTHER_ORGANISM	GOBP_RESPONSE_TO_BIOTIC_STIMULUS	GOBP_DEFENSE_RESPONSE	GOBP_INNATE_IMMUNE_RESPONSE				GOBP_RESPONSE_TO_INTERFERON_GAMMA		GOBP_RESPONSE_TO_CYTOKINE
XAF1	GOBP_DEFENSE_RESPONSE_TO_OTHER_ORGANISM	GOBP_RESPONSE_TO_BIOTIC_STIMULUS	GOBP_DEFENSE_RESPONSE	GOBP_INNATE_IMMUNE_RESPONSE						GOBP_RESPONSE_TO_CYTOKINE		GOBP_RESPONSE_TO_TYPE_I_INTERFERON					GOBP_CYTOKINE_MEDIATED_SIGNALING_PATHWAY
APOL1	GOBP_DEFENSE_RESPONSE_TO_OTHER_ORGANISM	GOBP_RESPONSE_TO_BIOTIC_STIMULUS	GOBP_DEFENSE_RESPONSE	GOBP_INNATE_IMMUNE_RESPONSE														GOBP_BIOLOGICAL_PROCESS_INVOLVED_IN_SYMBIOTIC_INTERACTION
MPEG1	GOBP_DEFENSE_RESPONSE_TO_OTHER_ORGANISM	GOBP_RESPONSE_TO_BIOTIC_STIMULUS	GOBP_DEFENSE_RESPONSE	GOBP_INNATE_IMMUNE_RESPONSE
RNF26	GOBP_DEFENSE_RESPONSE_TO_OTHER_ORGANISM	GOBP_RESPONSE_TO_BIOTIC_STIMULUS	GOBP_DEFENSE_RESPONSE		GOBP_DEFENSE_RESPONSE_TO_VIRUS	GOBP_RESPONSE_TO_VIRUS	GOBP_IMMUNE_EFFECTOR_PROCESS		GOBP_REGULATION_OF_IMMUNE_SYSTEM_PROCESS				GOBP_REGULATION_OF_RESPONSE_TO_BIOTIC_STIMULUS			GOBP_REGULATION_OF_IMMUNE_EFFECTOR_PROCESS			GOBP_NEGATIVE_REGULATION_OF_IMMUNE_SYSTEM_PROCESS	GOBP_REGULATION_OF_DEFENSE_RESPONSE
MOV10	GOBP_DEFENSE_RESPONSE_TO_OTHER_ORGANISM	GOBP_RESPONSE_TO_BIOTIC_STIMULUS	GOBP_DEFENSE_RESPONSE		GOBP_DEFENSE_RESPONSE_TO_VIRUS	GOBP_RESPONSE_TO_VIRUS	GOBP_IMMUNE_EFFECTOR_PROCESS		GOBP_REGULATION_OF_IMMUNE_SYSTEM_PROCESS									GOBP_BIOLOGICAL_PROCESS_INVOLVED_IN_SYMBIOTIC_INTERACTION
RTP4	GOBP_DEFENSE_RESPONSE_TO_OTHER_ORGANISM	GOBP_RESPONSE_TO_BIOTIC_STIMULUS	GOBP_DEFENSE_RESPONSE		GOBP_DEFENSE_RESPONSE_TO_VIRUS	GOBP_RESPONSE_TO_VIRUS	GOBP_IMMUNE_EFFECTOR_PROCESS
BATF2	GOBP_DEFENSE_RESPONSE_TO_OTHER_ORGANISM	GOBP_RESPONSE_TO_BIOTIC_STIMULUS	GOBP_DEFENSE_RESPONSE
ACTA2		GOBP_RESPONSE_TO_BIOTIC_STIMULUS				GOBP_RESPONSE_TO_VIRUS
CD274		GOBP_RESPONSE_TO_BIOTIC_STIMULUS							GOBP_REGULATION_OF_IMMUNE_SYSTEM_PROCESS	GOBP_RESPONSE_TO_CYTOKINE	GOBP_REGULATION_OF_IMMUNE_RESPONSE		GOBP_REGULATION_OF_RESPONSE_TO_BIOTIC_STIMULUS		GOBP_POSITIVE_REGULATION_OF_IMMUNE_SYSTEM_PROCESS				GOBP_NEGATIVE_REGULATION_OF_IMMUNE_SYSTEM_PROCESS
CARD17		GOBP_RESPONSE_TO_BIOTIC_STIMULUS
TGM2			GOBP_DEFENSE_RESPONSE																	GOBP_REGULATION_OF_DEFENSE_RESPONSE
APOL3			GOBP_DEFENSE_RESPONSE
APOL2			GOBP_DEFENSE_RESPONSE
BTN3A2							GOBP_IMMUNE_EFFECTOR_PROCESS		GOBP_REGULATION_OF_IMMUNE_SYSTEM_PROCESS		GOBP_REGULATION_OF_IMMUNE_RESPONSE				GOBP_POSITIVE_REGULATION_OF_IMMUNE_SYSTEM_PROCESS
DSP							GOBP_IMMUNE_EFFECTOR_PROCESS
DNASE2									GOBP_REGULATION_OF_IMMUNE_SYSTEM_PROCESS		GOBP_REGULATION_OF_IMMUNE_RESPONSE
CD101									GOBP_REGULATION_OF_IMMUNE_SYSTEM_PROCESS						GOBP_POSITIVE_REGULATION_OF_IMMUNE_SYSTEM_PROCESS
LGALS9C									GOBP_REGULATION_OF_IMMUNE_SYSTEM_PROCESS										GOBP_NEGATIVE_REGULATION_OF_IMMUNE_SYSTEM_PROCESS
SPRY2										GOBP_RESPONSE_TO_CYTOKINE
RUFY4										GOBP_RESPONSE_TO_CYTOKINE
NEDD4L																		GOBP_BIOLOGICAL_PROCESS_INVOLVED_IN_SYMBIOTIC_INTERACTION

## Sheet: GSEA-C7
Gene Set Name	# Genes in Gene Set (K)	Description	# Genes in Overlap (k)	k/K	p-value	FDR q-value
HOWARD_NEUTROPHIL_INACT_MONOV_INFLUENZA_A_INDONESIA_05_2005_H5N1_AGE_18_49YO_1DY_UP	394	Genes up-regulated in neutrophil 1d vs 0d in adults (18-49) after exposure to inactivated monovalent influenza A/Indonesia/05/2005 H5N1 split-virus vaccine , time point 1D , administered i.m.	40	0.1015	1.03e-57	5.38e-54
HOWARD_MONOCYTE_INACT_MONOV_INFLUENZA_A_INDONESIA_05_2005_H5N1_AGE_18_49YO_1DY_UP	231	Genes up-regulated in monocyte 1d vs 0d in adults (18-49) after exposure to inactivated monovalent influenza A/Indonesia/05/2005 H5N1 split-virus vaccine , time point 1D , administered i.m.	33	0.1429	3.01e-52	7.87e-49
HOWARD_DENDRITIC_CELL_INACT_MONOV_INFLUENZA_A_INDONESIA_05_2005_H5N1_AGE_18_49YO_1DY_UP	159	Genes up-regulated in dendritic cell 1d vs 0d in adults (18-49) after exposure to inactivated monovalent influenza A/Indonesia/05/2005 H5N1 split-virus vaccine , time point 1D , administered i.m.	30	0.1887	2.9e-51	5.05e-48
OSMAN_BLOOD_CHAD63_KH_AGE_18_50YO_HIGH_DOSE_SUBJECTS_24HR_UP	1992	Genes up-regulated in blood 24hr vs 0hr in adults (18-50) (high dose subjects) after exposure to ChAd63-KH , time point 24H , administered Intramuscular injection. Comment: DE gene list for high dose subjects.	54	0.0271	4.88e-49	6.37e-46
HOWARD_PBMC_INACT_MONOV_INFLUENZA_A_INDONESIA_05_2005_H5N1_AGE_19_39YO_AS03_ADJUVANT_VS_BUFFER_1DY_UP	377	Genes up-regulated in peripheral blood mononuclear cell vaccinated with AS03 adjuvant vs phosphate-bufferred saline in adults (19-39) after exposure to inactivated monovalent influenza A/Indonesia/05/2005 H5N1 split-virus vaccine , time point 1D , administered i.m.	35	0.0928	1.13e-48	1.18e-45
HOWARD_NEUTROPHIL_INACT_MONOV_INFLUENZA_A_INDONESIA_05_2005_H5N1_AGE_18_49YO_3DY_UP	119	Genes up-regulated in neutrophil 3d vs 0d in adults (18-49) after exposure to inactivated monovalent influenza A/Indonesia/05/2005 H5N1 split-virus vaccine , time point 3D , administered i.m.	26	0.2185	3.89e-46	3.39e-43
HARALAMBIEVA_PBMC_M_M_R_II_AGE_11_22YO_VACCINATED_VS_UNVACCINATED_7YR_UP	973	Genes up-regulated in peripheral blood mononuclear cell vaccinated vs unvaccinated in adolescent/young adults (11-22) after exposure to M-M-R II , time point 7Y	40	0.0411	9.46e-42	7.06e-39
ZAK_PBMC_MRKAD5_HIV_1_GAG_POL_NEF_AGE_20_50YO_1DY_UP	1012	Genes up-regulated in peripheral blood mononuclear cell 1d vs 0d in adults (20-50) after exposure to MRKAd5 HIV-1 gag/pol/nef , time point 1D. Comment: Table includes specific cell types	39	0.0385	1.58e-39	1.03e-36
GSE21546_WT_VS_SAP1A_KO_DP_THYMOCYTES_UP	196	Genes up-regulated in untreated double positive thymocytes: wildtype versus ELK4 [GeneID=2005] knockout.	24	0.1224	4.92e-36	2.85e-33
ERWIN_COHEN_BLOOD_TC_83_AGE_23_48YO_VACCINATED_VS_CONTROL_2DY_UP	119	Genes up-regulated in blood vaccinated vs control in adults (23-48) after exposure to Live attenuated vaccine TC-83 , time point 2D	21	0.1765	4.3e-35	2.24e-32
GAUCHER_PBMC_YF_VAX_STAMARIL_UNKNOWN_AGE_10DY_UP	196	Genes up-regulated in peripheral blood mononuclear cell 10d vs 0d in unknown after exposure to YF-Vax/Stamaril , time point 10D	23	0.1173	4.41e-34	2.09e-31
GSE42724_NAIVE_BCELL_VS_PLASMABLAST_UP	197	Genes up-regulated in B lymphocytes: naÔve versus plasmablasts.	23	0.1168	4.99e-34	2.17e-31
GAUCHER_PBMC_YF_VAX_STAMARIL_UNKNOWN_AGE_7DY_UP	292	Genes up-regulated in peripheral blood mononuclear cell 7d vs 0d in unknown after exposure to YF-Vax/Stamaril , time point 7D	25	0.0856	1.64e-33	6.59e-31
GSE18791_CTRL_VS_NEWCASTLE_VIRUS_DC_8H_DN	196	Genes down-regulated in comparison of control conventional dendritic cells (cDC) at 0 h versus cDCs infected with Newcastle disease virus (NDV) at 8 h.	22	0.1122	3.71e-32	1.38e-29
GSE37533_PPARG2_FOXP3_VS_FOXP3_TRANSDUCED_CD4_TCELL_DN	198	Genes down-regulated in CD4 [GeneID=920] over-expressing: FOXP3 [GeneID=50943] and PPARg2 form of PPARG [GeneID=5468] versus FOXP3 [GeneID=50943].	22	0.1111	4.68e-32	1.63e-29
GSE40685_TREG_VS_FOXP3_KO_TREG_PRECURSOR_UP	199	Genes up-regulated in CD4: FOXP3+ [GeneID=50943] T reg versus FOXP3 [GeneID=50943] knockout T reg precursor.	22	0.1106	5.26e-32	1.72e-29
GSE13485_CTRL_VS_DAY7_YF17D_VACCINE_PBMC_DN	200	Genes down-regulated in comparison of unstimulated peripheral blood mononuclear cells (PBMC) versus PBMC 7 days after stimulation with YF17D vaccine.	21	0.105	4.54e-30	1.19e-27
GSE37533_PPARG1_FOXP3_VS_FOXP3_TRANSDUCED_CD4_TCELL_DN	200	Genes down-regulated in CD4 [GeneID=920] over-expressing: FOXP3 [GeneID=50943] and PPARg1 form of PPARG [GeneID=5468] versus FOXP3 [GeneID=50943].	21	0.105	4.54e-30	1.19e-27
GSE42021_TREG_PLN_VS_CD24INT_TREG_THYMUS_DN	200	Genes down-regulated in T reg: peripheral lymph nodes versus thymic CD24 int [GeneID=100133941].	21	0.105	4.54e-30	1.19e-27
GSE42021_TREG_VS_TCONV_PLN_UP	200	Genes up-regulated in cells from peripheral lymph nodes: T reg versus T conv.	21	0.105	4.54e-30	1.19e-27
Gene Symbol	HOWARD_NEUTROPHIL_INACT_MONOV_INFLUENZA_A_INDONESIA_05_2005_H5N1_AGE_18_49YO_1DY_UP	HOWARD_MONOCYTE_INACT_MONOV_INFLUENZA_A_INDONESIA_05_2005_H5N1_AGE_18_49YO_1DY_UP	HOWARD_DENDRITIC_CELL_INACT_MONOV_INFLUENZA_A_INDONESIA_05_2005_H5N1_AGE_18_49YO_1DY_UP	OSMAN_BLOOD_CHAD63_KH_AGE_18_50YO_HIGH_DOSE_SUBJECTS_24HR_UP	HOWARD_PBMC_INACT_MONOV_INFLUENZA_A_INDONESIA_05_2005_H5N1_AGE_19_39YO_AS03_ADJUVANT_VS_BUFFER_1DY_UP	HOWARD_NEUTROPHIL_INACT_MONOV_INFLUENZA_A_INDONESIA_05_2005_H5N1_AGE_18_49YO_3DY_UP	HARALAMBIEVA_PBMC_M_M_R_II_AGE_11_22YO_VACCINATED_VS_UNVACCINATED_7YR_UP	ZAK_PBMC_MRKAD5_HIV_1_GAG_POL_NEF_AGE_20_50YO_1DY_UP	ERWIN_COHEN_BLOOD_TC_83_AGE_23_48YO_VACCINATED_VS_CONTROL_2DY_UP	GAUCHER_PBMC_YF_VAX_STAMARIL_UNKNOWN_AGE_10DY_UP	GAUCHER_PBMC_YF_VAX_STAMARIL_UNKNOWN_AGE_7DY_UP	GSE18791_CTRL_VS_NEWCASTLE_VIRUS_DC_8H_DN	GSE13485_CTRL_VS_DAY7_YF17D_VACCINE_PBMC_DN
DDX60	HOWARD_NEUTROPHIL_INACT_MONOV_INFLUENZA_A_INDONESIA_05_2005_H5N1_AGE_18_49YO_1DY_UP	HOWARD_MONOCYTE_INACT_MONOV_INFLUENZA_A_INDONESIA_05_2005_H5N1_AGE_18_49YO_1DY_UP	HOWARD_DENDRITIC_CELL_INACT_MONOV_INFLUENZA_A_INDONESIA_05_2005_H5N1_AGE_18_49YO_1DY_UP	OSMAN_BLOOD_CHAD63_KH_AGE_18_50YO_HIGH_DOSE_SUBJECTS_24HR_UP	HOWARD_PBMC_INACT_MONOV_INFLUENZA_A_INDONESIA_05_2005_H5N1_AGE_19_39YO_AS03_ADJUVANT_VS_BUFFER_1DY_UP	HOWARD_NEUTROPHIL_INACT_MONOV_INFLUENZA_A_INDONESIA_05_2005_H5N1_AGE_18_49YO_3DY_UP	HARALAMBIEVA_PBMC_M_M_R_II_AGE_11_22YO_VACCINATED_VS_UNVACCINATED_7YR_UP	ZAK_PBMC_MRKAD5_HIV_1_GAG_POL_NEF_AGE_20_50YO_1DY_UP	ERWIN_COHEN_BLOOD_TC_83_AGE_23_48YO_VACCINATED_VS_CONTROL_2DY_UP	GAUCHER_PBMC_YF_VAX_STAMARIL_UNKNOWN_AGE_10DY_UP	GAUCHER_PBMC_YF_VAX_STAMARIL_UNKNOWN_AGE_7DY_UP	GSE18791_CTRL_VS_NEWCASTLE_VIRUS_DC_8H_DN	GSE13485_CTRL_VS_DAY7_YF17D_VACCINE_PBMC_DN
XAF1	HOWARD_NEUTROPHIL_INACT_MONOV_INFLUENZA_A_INDONESIA_05_2005_H5N1_AGE_18_49YO_1DY_UP	HOWARD_MONOCYTE_INACT_MONOV_INFLUENZA_A_INDONESIA_05_2005_H5N1_AGE_18_49YO_1DY_UP	HOWARD_DENDRITIC_CELL_INACT_MONOV_INFLUENZA_A_INDONESIA_05_2005_H5N1_AGE_18_49YO_1DY_UP	OSMAN_BLOOD_CHAD63_KH_AGE_18_50YO_HIGH_DOSE_SUBJECTS_24HR_UP	HOWARD_PBMC_INACT_MONOV_INFLUENZA_A_INDONESIA_05_2005_H5N1_AGE_19_39YO_AS03_ADJUVANT_VS_BUFFER_1DY_UP	HOWARD_NEUTROPHIL_INACT_MONOV_INFLUENZA_A_INDONESIA_05_2005_H5N1_AGE_18_49YO_3DY_UP	HARALAMBIEVA_PBMC_M_M_R_II_AGE_11_22YO_VACCINATED_VS_UNVACCINATED_7YR_UP	ZAK_PBMC_MRKAD5_HIV_1_GAG_POL_NEF_AGE_20_50YO_1DY_UP	ERWIN_COHEN_BLOOD_TC_83_AGE_23_48YO_VACCINATED_VS_CONTROL_2DY_UP	GAUCHER_PBMC_YF_VAX_STAMARIL_UNKNOWN_AGE_10DY_UP	GAUCHER_PBMC_YF_VAX_STAMARIL_UNKNOWN_AGE_7DY_UP	GSE18791_CTRL_VS_NEWCASTLE_VIRUS_DC_8H_DN	GSE13485_CTRL_VS_DAY7_YF17D_VACCINE_PBMC_DN
GBP1	HOWARD_NEUTROPHIL_INACT_MONOV_INFLUENZA_A_INDONESIA_05_2005_H5N1_AGE_18_49YO_1DY_UP	HOWARD_MONOCYTE_INACT_MONOV_INFLUENZA_A_INDONESIA_05_2005_H5N1_AGE_18_49YO_1DY_UP	HOWARD_DENDRITIC_CELL_INACT_MONOV_INFLUENZA_A_INDONESIA_05_2005_H5N1_AGE_18_49YO_1DY_UP	OSMAN_BLOOD_CHAD63_KH_AGE_18_50YO_HIGH_DOSE_SUBJECTS_24HR_UP	HOWARD_PBMC_INACT_MONOV_INFLUENZA_A_INDONESIA_05_2005_H5N1_AGE_19_39YO_AS03_ADJUVANT_VS_BUFFER_1DY_UP	HOWARD_NEUTROPHIL_INACT_MONOV_INFLUENZA_A_INDONESIA_05_2005_H5N1_AGE_18_49YO_3DY_UP	HARALAMBIEVA_PBMC_M_M_R_II_AGE_11_22YO_VACCINATED_VS_UNVACCINATED_7YR_UP	ZAK_PBMC_MRKAD5_HIV_1_GAG_POL_NEF_AGE_20_50YO_1DY_UP	ERWIN_COHEN_BLOOD_TC_83_AGE_23_48YO_VACCINATED_VS_CONTROL_2DY_UP	GAUCHER_PBMC_YF_VAX_STAMARIL_UNKNOWN_AGE_10DY_UP	GAUCHER_PBMC_YF_VAX_STAMARIL_UNKNOWN_AGE_7DY_UP	GSE18791_CTRL_VS_NEWCASTLE_VIRUS_DC_8H_DN	GSE13485_CTRL_VS_DAY7_YF17D_VACCINE_PBMC_DN
BATF2	HOWARD_NEUTROPHIL_INACT_MONOV_INFLUENZA_A_INDONESIA_05_2005_H5N1_AGE_18_49YO_1DY_UP	HOWARD_MONOCYTE_INACT_MONOV_INFLUENZA_A_INDONESIA_05_2005_H5N1_AGE_18_49YO_1DY_UP	HOWARD_DENDRITIC_CELL_INACT_MONOV_INFLUENZA_A_INDONESIA_05_2005_H5N1_AGE_18_49YO_1DY_UP	OSMAN_BLOOD_CHAD63_KH_AGE_18_50YO_HIGH_DOSE_SUBJECTS_24HR_UP	HOWARD_PBMC_INACT_MONOV_INFLUENZA_A_INDONESIA_05_2005_H5N1_AGE_19_39YO_AS03_ADJUVANT_VS_BUFFER_1DY_UP	HOWARD_NEUTROPHIL_INACT_MONOV_INFLUENZA_A_INDONESIA_05_2005_H5N1_AGE_18_49YO_3DY_UP	HARALAMBIEVA_PBMC_M_M_R_II_AGE_11_22YO_VACCINATED_VS_UNVACCINATED_7YR_UP	ZAK_PBMC_MRKAD5_HIV_1_GAG_POL_NEF_AGE_20_50YO_1DY_UP	ERWIN_COHEN_BLOOD_TC_83_AGE_23_48YO_VACCINATED_VS_CONTROL_2DY_UP	GAUCHER_PBMC_YF_VAX_STAMARIL_UNKNOWN_AGE_10DY_UP	GAUCHER_PBMC_YF_VAX_STAMARIL_UNKNOWN_AGE_7DY_UP	GSE18791_CTRL_VS_NEWCASTLE_VIRUS_DC_8H_DN	GSE13485_CTRL_VS_DAY7_YF17D_VACCINE_PBMC_DN
IFI35	HOWARD_NEUTROPHIL_INACT_MONOV_INFLUENZA_A_INDONESIA_05_2005_H5N1_AGE_18_49YO_1DY_UP	HOWARD_MONOCYTE_INACT_MONOV_INFLUENZA_A_INDONESIA_05_2005_H5N1_AGE_18_49YO_1DY_UP	HOWARD_DENDRITIC_CELL_INACT_MONOV_INFLUENZA_A_INDONESIA_05_2005_H5N1_AGE_18_49YO_1DY_UP	OSMAN_BLOOD_CHAD63_KH_AGE_18_50YO_HIGH_DOSE_SUBJECTS_24HR_UP	HOWARD_PBMC_INACT_MONOV_INFLUENZA_A_INDONESIA_05_2005_H5N1_AGE_19_39YO_AS03_ADJUVANT_VS_BUFFER_1DY_UP	HOWARD_NEUTROPHIL_INACT_MONOV_INFLUENZA_A_INDONESIA_05_2005_H5N1_AGE_18_49YO_3DY_UP	HARALAMBIEVA_PBMC_M_M_R_II_AGE_11_22YO_VACCINATED_VS_UNVACCINATED_7YR_UP	ZAK_PBMC_MRKAD5_HIV_1_GAG_POL_NEF_AGE_20_50YO_1DY_UP	ERWIN_COHEN_BLOOD_TC_83_AGE_23_48YO_VACCINATED_VS_CONTROL_2DY_UP	GAUCHER_PBMC_YF_VAX_STAMARIL_UNKNOWN_AGE_10DY_UP	GAUCHER_PBMC_YF_VAX_STAMARIL_UNKNOWN_AGE_7DY_UP		GSE13485_CTRL_VS_DAY7_YF17D_VACCINE_PBMC_DN
ETV7	HOWARD_NEUTROPHIL_INACT_MONOV_INFLUENZA_A_INDONESIA_05_2005_H5N1_AGE_18_49YO_1DY_UP	HOWARD_MONOCYTE_INACT_MONOV_INFLUENZA_A_INDONESIA_05_2005_H5N1_AGE_18_49YO_1DY_UP	HOWARD_DENDRITIC_CELL_INACT_MONOV_INFLUENZA_A_INDONESIA_05_2005_H5N1_AGE_18_49YO_1DY_UP	OSMAN_BLOOD_CHAD63_KH_AGE_18_50YO_HIGH_DOSE_SUBJECTS_24HR_UP	HOWARD_PBMC_INACT_MONOV_INFLUENZA_A_INDONESIA_05_2005_H5N1_AGE_19_39YO_AS03_ADJUVANT_VS_BUFFER_1DY_UP	HOWARD_NEUTROPHIL_INACT_MONOV_INFLUENZA_A_INDONESIA_05_2005_H5N1_AGE_18_49YO_3DY_UP	HARALAMBIEVA_PBMC_M_M_R_II_AGE_11_22YO_VACCINATED_VS_UNVACCINATED_7YR_UP	ZAK_PBMC_MRKAD5_HIV_1_GAG_POL_NEF_AGE_20_50YO_1DY_UP	ERWIN_COHEN_BLOOD_TC_83_AGE_23_48YO_VACCINATED_VS_CONTROL_2DY_UP			GSE18791_CTRL_VS_NEWCASTLE_VIRUS_DC_8H_DN
CD274	HOWARD_NEUTROPHIL_INACT_MONOV_INFLUENZA_A_INDONESIA_05_2005_H5N1_AGE_18_49YO_1DY_UP	HOWARD_MONOCYTE_INACT_MONOV_INFLUENZA_A_INDONESIA_05_2005_H5N1_AGE_18_49YO_1DY_UP	HOWARD_DENDRITIC_CELL_INACT_MONOV_INFLUENZA_A_INDONESIA_05_2005_H5N1_AGE_18_49YO_1DY_UP	OSMAN_BLOOD_CHAD63_KH_AGE_18_50YO_HIGH_DOSE_SUBJECTS_24HR_UP	HOWARD_PBMC_INACT_MONOV_INFLUENZA_A_INDONESIA_05_2005_H5N1_AGE_19_39YO_AS03_ADJUVANT_VS_BUFFER_1DY_UP	HOWARD_NEUTROPHIL_INACT_MONOV_INFLUENZA_A_INDONESIA_05_2005_H5N1_AGE_18_49YO_3DY_UP	HARALAMBIEVA_PBMC_M_M_R_II_AGE_11_22YO_VACCINATED_VS_UNVACCINATED_7YR_UP	ZAK_PBMC_MRKAD5_HIV_1_GAG_POL_NEF_AGE_20_50YO_1DY_UP	ERWIN_COHEN_BLOOD_TC_83_AGE_23_48YO_VACCINATED_VS_CONTROL_2DY_UP			GSE18791_CTRL_VS_NEWCASTLE_VIRUS_DC_8H_DN
GBP3	HOWARD_NEUTROPHIL_INACT_MONOV_INFLUENZA_A_INDONESIA_05_2005_H5N1_AGE_18_49YO_1DY_UP	HOWARD_MONOCYTE_INACT_MONOV_INFLUENZA_A_INDONESIA_05_2005_H5N1_AGE_18_49YO_1DY_UP	HOWARD_DENDRITIC_CELL_INACT_MONOV_INFLUENZA_A_INDONESIA_05_2005_H5N1_AGE_18_49YO_1DY_UP	OSMAN_BLOOD_CHAD63_KH_AGE_18_50YO_HIGH_DOSE_SUBJECTS_24HR_UP	HOWARD_PBMC_INACT_MONOV_INFLUENZA_A_INDONESIA_05_2005_H5N1_AGE_19_39YO_AS03_ADJUVANT_VS_BUFFER_1DY_UP	HOWARD_NEUTROPHIL_INACT_MONOV_INFLUENZA_A_INDONESIA_05_2005_H5N1_AGE_18_49YO_3DY_UP	HARALAMBIEVA_PBMC_M_M_R_II_AGE_11_22YO_VACCINATED_VS_UNVACCINATED_7YR_UP	ZAK_PBMC_MRKAD5_HIV_1_GAG_POL_NEF_AGE_20_50YO_1DY_UP					GSE13485_CTRL_VS_DAY7_YF17D_VACCINE_PBMC_DN
SERPING1	HOWARD_NEUTROPHIL_INACT_MONOV_INFLUENZA_A_INDONESIA_05_2005_H5N1_AGE_18_49YO_1DY_UP	HOWARD_MONOCYTE_INACT_MONOV_INFLUENZA_A_INDONESIA_05_2005_H5N1_AGE_18_49YO_1DY_UP	HOWARD_DENDRITIC_CELL_INACT_MONOV_INFLUENZA_A_INDONESIA_05_2005_H5N1_AGE_18_49YO_1DY_UP	OSMAN_BLOOD_CHAD63_KH_AGE_18_50YO_HIGH_DOSE_SUBJECTS_24HR_UP	HOWARD_PBMC_INACT_MONOV_INFLUENZA_A_INDONESIA_05_2005_H5N1_AGE_19_39YO_AS03_ADJUVANT_VS_BUFFER_1DY_UP	HOWARD_NEUTROPHIL_INACT_MONOV_INFLUENZA_A_INDONESIA_05_2005_H5N1_AGE_18_49YO_3DY_UP	HARALAMBIEVA_PBMC_M_M_R_II_AGE_11_22YO_VACCINATED_VS_UNVACCINATED_7YR_UP	ZAK_PBMC_MRKAD5_HIV_1_GAG_POL_NEF_AGE_20_50YO_1DY_UP	ERWIN_COHEN_BLOOD_TC_83_AGE_23_48YO_VACCINATED_VS_CONTROL_2DY_UP	GAUCHER_PBMC_YF_VAX_STAMARIL_UNKNOWN_AGE_10DY_UP	GAUCHER_PBMC_YF_VAX_STAMARIL_UNKNOWN_AGE_7DY_UP	GSE18791_CTRL_VS_NEWCASTLE_VIRUS_DC_8H_DN	GSE13485_CTRL_VS_DAY7_YF17D_VACCINE_PBMC_DN
GBP5	HOWARD_NEUTROPHIL_INACT_MONOV_INFLUENZA_A_INDONESIA_05_2005_H5N1_AGE_18_49YO_1DY_UP	HOWARD_MONOCYTE_INACT_MONOV_INFLUENZA_A_INDONESIA_05_2005_H5N1_AGE_18_49YO_1DY_UP	HOWARD_DENDRITIC_CELL_INACT_MONOV_INFLUENZA_A_INDONESIA_05_2005_H5N1_AGE_18_49YO_1DY_UP	OSMAN_BLOOD_CHAD63_KH_AGE_18_50YO_HIGH_DOSE_SUBJECTS_24HR_UP	HOWARD_PBMC_INACT_MONOV_INFLUENZA_A_INDONESIA_05_2005_H5N1_AGE_19_39YO_AS03_ADJUVANT_VS_BUFFER_1DY_UP	HOWARD_NEUTROPHIL_INACT_MONOV_INFLUENZA_A_INDONESIA_05_2005_H5N1_AGE_18_49YO_3DY_UP	HARALAMBIEVA_PBMC_M_M_R_II_AGE_11_22YO_VACCINATED_VS_UNVACCINATED_7YR_UP	ZAK_PBMC_MRKAD5_HIV_1_GAG_POL_NEF_AGE_20_50YO_1DY_UP	ERWIN_COHEN_BLOOD_TC_83_AGE_23_48YO_VACCINATED_VS_CONTROL_2DY_UP	GAUCHER_PBMC_YF_VAX_STAMARIL_UNKNOWN_AGE_10DY_UP	GAUCHER_PBMC_YF_VAX_STAMARIL_UNKNOWN_AGE_7DY_UP	GSE18791_CTRL_VS_NEWCASTLE_VIRUS_DC_8H_DN
GBP4	HOWARD_NEUTROPHIL_INACT_MONOV_INFLUENZA_A_INDONESIA_05_2005_H5N1_AGE_18_49YO_1DY_UP	HOWARD_MONOCYTE_INACT_MONOV_INFLUENZA_A_INDONESIA_05_2005_H5N1_AGE_18_49YO_1DY_UP	HOWARD_DENDRITIC_CELL_INACT_MONOV_INFLUENZA_A_INDONESIA_05_2005_H5N1_AGE_18_49YO_1DY_UP	OSMAN_BLOOD_CHAD63_KH_AGE_18_50YO_HIGH_DOSE_SUBJECTS_24HR_UP	HOWARD_PBMC_INACT_MONOV_INFLUENZA_A_INDONESIA_05_2005_H5N1_AGE_19_39YO_AS03_ADJUVANT_VS_BUFFER_1DY_UP	HOWARD_NEUTROPHIL_INACT_MONOV_INFLUENZA_A_INDONESIA_05_2005_H5N1_AGE_18_49YO_3DY_UP	HARALAMBIEVA_PBMC_M_M_R_II_AGE_11_22YO_VACCINATED_VS_UNVACCINATED_7YR_UP	ZAK_PBMC_MRKAD5_HIV_1_GAG_POL_NEF_AGE_20_50YO_1DY_UP	ERWIN_COHEN_BLOOD_TC_83_AGE_23_48YO_VACCINATED_VS_CONTROL_2DY_UP		GAUCHER_PBMC_YF_VAX_STAMARIL_UNKNOWN_AGE_7DY_UP	GSE18791_CTRL_VS_NEWCASTLE_VIRUS_DC_8H_DN	GSE13485_CTRL_VS_DAY7_YF17D_VACCINE_PBMC_DN
APOL3	HOWARD_NEUTROPHIL_INACT_MONOV_INFLUENZA_A_INDONESIA_05_2005_H5N1_AGE_18_49YO_1DY_UP	HOWARD_MONOCYTE_INACT_MONOV_INFLUENZA_A_INDONESIA_05_2005_H5N1_AGE_18_49YO_1DY_UP	HOWARD_DENDRITIC_CELL_INACT_MONOV_INFLUENZA_A_INDONESIA_05_2005_H5N1_AGE_18_49YO_1DY_UP	OSMAN_BLOOD_CHAD63_KH_AGE_18_50YO_HIGH_DOSE_SUBJECTS_24HR_UP	HOWARD_PBMC_INACT_MONOV_INFLUENZA_A_INDONESIA_05_2005_H5N1_AGE_19_39YO_AS03_ADJUVANT_VS_BUFFER_1DY_UP	HOWARD_NEUTROPHIL_INACT_MONOV_INFLUENZA_A_INDONESIA_05_2005_H5N1_AGE_18_49YO_3DY_UP	HARALAMBIEVA_PBMC_M_M_R_II_AGE_11_22YO_VACCINATED_VS_UNVACCINATED_7YR_UP	ZAK_PBMC_MRKAD5_HIV_1_GAG_POL_NEF_AGE_20_50YO_1DY_UP		GAUCHER_PBMC_YF_VAX_STAMARIL_UNKNOWN_AGE_10DY_UP	GAUCHER_PBMC_YF_VAX_STAMARIL_UNKNOWN_AGE_7DY_UP
FCGR1A	HOWARD_NEUTROPHIL_INACT_MONOV_INFLUENZA_A_INDONESIA_05_2005_H5N1_AGE_18_49YO_1DY_UP	HOWARD_MONOCYTE_INACT_MONOV_INFLUENZA_A_INDONESIA_05_2005_H5N1_AGE_18_49YO_1DY_UP	HOWARD_DENDRITIC_CELL_INACT_MONOV_INFLUENZA_A_INDONESIA_05_2005_H5N1_AGE_18_49YO_1DY_UP	OSMAN_BLOOD_CHAD63_KH_AGE_18_50YO_HIGH_DOSE_SUBJECTS_24HR_UP	HOWARD_PBMC_INACT_MONOV_INFLUENZA_A_INDONESIA_05_2005_H5N1_AGE_19_39YO_AS03_ADJUVANT_VS_BUFFER_1DY_UP	HOWARD_NEUTROPHIL_INACT_MONOV_INFLUENZA_A_INDONESIA_05_2005_H5N1_AGE_18_49YO_3DY_UP
UBE2L6	HOWARD_NEUTROPHIL_INACT_MONOV_INFLUENZA_A_INDONESIA_05_2005_H5N1_AGE_18_49YO_1DY_UP	HOWARD_MONOCYTE_INACT_MONOV_INFLUENZA_A_INDONESIA_05_2005_H5N1_AGE_18_49YO_1DY_UP	HOWARD_DENDRITIC_CELL_INACT_MONOV_INFLUENZA_A_INDONESIA_05_2005_H5N1_AGE_18_49YO_1DY_UP	OSMAN_BLOOD_CHAD63_KH_AGE_18_50YO_HIGH_DOSE_SUBJECTS_24HR_UP	HOWARD_PBMC_INACT_MONOV_INFLUENZA_A_INDONESIA_05_2005_H5N1_AGE_19_39YO_AS03_ADJUVANT_VS_BUFFER_1DY_UP		HARALAMBIEVA_PBMC_M_M_R_II_AGE_11_22YO_VACCINATED_VS_UNVACCINATED_7YR_UP	ZAK_PBMC_MRKAD5_HIV_1_GAG_POL_NEF_AGE_20_50YO_1DY_UP	ERWIN_COHEN_BLOOD_TC_83_AGE_23_48YO_VACCINATED_VS_CONTROL_2DY_UP	GAUCHER_PBMC_YF_VAX_STAMARIL_UNKNOWN_AGE_10DY_UP	GAUCHER_PBMC_YF_VAX_STAMARIL_UNKNOWN_AGE_7DY_UP	GSE18791_CTRL_VS_NEWCASTLE_VIRUS_DC_8H_DN	GSE13485_CTRL_VS_DAY7_YF17D_VACCINE_PBMC_DN
STAT1	HOWARD_NEUTROPHIL_INACT_MONOV_INFLUENZA_A_INDONESIA_05_2005_H5N1_AGE_18_49YO_1DY_UP	HOWARD_MONOCYTE_INACT_MONOV_INFLUENZA_A_INDONESIA_05_2005_H5N1_AGE_18_49YO_1DY_UP	HOWARD_DENDRITIC_CELL_INACT_MONOV_INFLUENZA_A_INDONESIA_05_2005_H5N1_AGE_18_49YO_1DY_UP	OSMAN_BLOOD_CHAD63_KH_AGE_18_50YO_HIGH_DOSE_SUBJECTS_24HR_UP	HOWARD_PBMC_INACT_MONOV_INFLUENZA_A_INDONESIA_05_2005_H5N1_AGE_19_39YO_AS03_ADJUVANT_VS_BUFFER_1DY_UP		HARALAMBIEVA_PBMC_M_M_R_II_AGE_11_22YO_VACCINATED_VS_UNVACCINATED_7YR_UP	ZAK_PBMC_MRKAD5_HIV_1_GAG_POL_NEF_AGE_20_50YO_1DY_UP	ERWIN_COHEN_BLOOD_TC_83_AGE_23_48YO_VACCINATED_VS_CONTROL_2DY_UP	GAUCHER_PBMC_YF_VAX_STAMARIL_UNKNOWN_AGE_10DY_UP	GAUCHER_PBMC_YF_VAX_STAMARIL_UNKNOWN_AGE_7DY_UP		GSE13485_CTRL_VS_DAY7_YF17D_VACCINE_PBMC_DN
APOL1	HOWARD_NEUTROPHIL_INACT_MONOV_INFLUENZA_A_INDONESIA_05_2005_H5N1_AGE_18_49YO_1DY_UP	HOWARD_MONOCYTE_INACT_MONOV_INFLUENZA_A_INDONESIA_05_2005_H5N1_AGE_18_49YO_1DY_UP	HOWARD_DENDRITIC_CELL_INACT_MONOV_INFLUENZA_A_INDONESIA_05_2005_H5N1_AGE_18_49YO_1DY_UP	OSMAN_BLOOD_CHAD63_KH_AGE_18_50YO_HIGH_DOSE_SUBJECTS_24HR_UP	HOWARD_PBMC_INACT_MONOV_INFLUENZA_A_INDONESIA_05_2005_H5N1_AGE_19_39YO_AS03_ADJUVANT_VS_BUFFER_1DY_UP		HARALAMBIEVA_PBMC_M_M_R_II_AGE_11_22YO_VACCINATED_VS_UNVACCINATED_7YR_UP	ZAK_PBMC_MRKAD5_HIV_1_GAG_POL_NEF_AGE_20_50YO_1DY_UP				GSE18791_CTRL_VS_NEWCASTLE_VIRUS_DC_8H_DN
DTX3L	HOWARD_NEUTROPHIL_INACT_MONOV_INFLUENZA_A_INDONESIA_05_2005_H5N1_AGE_18_49YO_1DY_UP	HOWARD_MONOCYTE_INACT_MONOV_INFLUENZA_A_INDONESIA_05_2005_H5N1_AGE_18_49YO_1DY_UP	HOWARD_DENDRITIC_CELL_INACT_MONOV_INFLUENZA_A_INDONESIA_05_2005_H5N1_AGE_18_49YO_1DY_UP	OSMAN_BLOOD_CHAD63_KH_AGE_18_50YO_HIGH_DOSE_SUBJECTS_24HR_UP	HOWARD_PBMC_INACT_MONOV_INFLUENZA_A_INDONESIA_05_2005_H5N1_AGE_19_39YO_AS03_ADJUVANT_VS_BUFFER_1DY_UP		HARALAMBIEVA_PBMC_M_M_R_II_AGE_11_22YO_VACCINATED_VS_UNVACCINATED_7YR_UP	ZAK_PBMC_MRKAD5_HIV_1_GAG_POL_NEF_AGE_20_50YO_1DY_UP				GSE18791_CTRL_VS_NEWCASTLE_VIRUS_DC_8H_DN	GSE13485_CTRL_VS_DAY7_YF17D_VACCINE_PBMC_DN
CASP7	HOWARD_NEUTROPHIL_INACT_MONOV_INFLUENZA_A_INDONESIA_05_2005_H5N1_AGE_18_49YO_1DY_UP	HOWARD_MONOCYTE_INACT_MONOV_INFLUENZA_A_INDONESIA_05_2005_H5N1_AGE_18_49YO_1DY_UP	HOWARD_DENDRITIC_CELL_INACT_MONOV_INFLUENZA_A_INDONESIA_05_2005_H5N1_AGE_18_49YO_1DY_UP	OSMAN_BLOOD_CHAD63_KH_AGE_18_50YO_HIGH_DOSE_SUBJECTS_24HR_UP	HOWARD_PBMC_INACT_MONOV_INFLUENZA_A_INDONESIA_05_2005_H5N1_AGE_19_39YO_AS03_ADJUVANT_VS_BUFFER_1DY_UP		HARALAMBIEVA_PBMC_M_M_R_II_AGE_11_22YO_VACCINATED_VS_UNVACCINATED_7YR_UP	ZAK_PBMC_MRKAD5_HIV_1_GAG_POL_NEF_AGE_20_50YO_1DY_UP
APOL2	HOWARD_NEUTROPHIL_INACT_MONOV_INFLUENZA_A_INDONESIA_05_2005_H5N1_AGE_18_49YO_1DY_UP	HOWARD_MONOCYTE_INACT_MONOV_INFLUENZA_A_INDONESIA_05_2005_H5N1_AGE_18_49YO_1DY_UP	HOWARD_DENDRITIC_CELL_INACT_MONOV_INFLUENZA_A_INDONESIA_05_2005_H5N1_AGE_18_49YO_1DY_UP	OSMAN_BLOOD_CHAD63_KH_AGE_18_50YO_HIGH_DOSE_SUBJECTS_24HR_UP	HOWARD_PBMC_INACT_MONOV_INFLUENZA_A_INDONESIA_05_2005_H5N1_AGE_19_39YO_AS03_ADJUVANT_VS_BUFFER_1DY_UP		HARALAMBIEVA_PBMC_M_M_R_II_AGE_11_22YO_VACCINATED_VS_UNVACCINATED_7YR_UP	ZAK_PBMC_MRKAD5_HIV_1_GAG_POL_NEF_AGE_20_50YO_1DY_UP
FBXO6	HOWARD_NEUTROPHIL_INACT_MONOV_INFLUENZA_A_INDONESIA_05_2005_H5N1_AGE_18_49YO_1DY_UP	HOWARD_MONOCYTE_INACT_MONOV_INFLUENZA_A_INDONESIA_05_2005_H5N1_AGE_18_49YO_1DY_UP	HOWARD_DENDRITIC_CELL_INACT_MONOV_INFLUENZA_A_INDONESIA_05_2005_H5N1_AGE_18_49YO_1DY_UP	OSMAN_BLOOD_CHAD63_KH_AGE_18_50YO_HIGH_DOSE_SUBJECTS_24HR_UP	HOWARD_PBMC_INACT_MONOV_INFLUENZA_A_INDONESIA_05_2005_H5N1_AGE_19_39YO_AS03_ADJUVANT_VS_BUFFER_1DY_UP		HARALAMBIEVA_PBMC_M_M_R_II_AGE_11_22YO_VACCINATED_VS_UNVACCINATED_7YR_UP	ZAK_PBMC_MRKAD5_HIV_1_GAG_POL_NEF_AGE_20_50YO_1DY_UP	ERWIN_COHEN_BLOOD_TC_83_AGE_23_48YO_VACCINATED_VS_CONTROL_2DY_UP	GAUCHER_PBMC_YF_VAX_STAMARIL_UNKNOWN_AGE_10DY_UP	GAUCHER_PBMC_YF_VAX_STAMARIL_UNKNOWN_AGE_7DY_UP		GSE13485_CTRL_VS_DAY7_YF17D_VACCINE_PBMC_DN
APOL6	HOWARD_NEUTROPHIL_INACT_MONOV_INFLUENZA_A_INDONESIA_05_2005_H5N1_AGE_18_49YO_1DY_UP	HOWARD_MONOCYTE_INACT_MONOV_INFLUENZA_A_INDONESIA_05_2005_H5N1_AGE_18_49YO_1DY_UP	HOWARD_DENDRITIC_CELL_INACT_MONOV_INFLUENZA_A_INDONESIA_05_2005_H5N1_AGE_18_49YO_1DY_UP	OSMAN_BLOOD_CHAD63_KH_AGE_18_50YO_HIGH_DOSE_SUBJECTS_24HR_UP	HOWARD_PBMC_INACT_MONOV_INFLUENZA_A_INDONESIA_05_2005_H5N1_AGE_19_39YO_AS03_ADJUVANT_VS_BUFFER_1DY_UP		HARALAMBIEVA_PBMC_M_M_R_II_AGE_11_22YO_VACCINATED_VS_UNVACCINATED_7YR_UP	ZAK_PBMC_MRKAD5_HIV_1_GAG_POL_NEF_AGE_20_50YO_1DY_UP	ERWIN_COHEN_BLOOD_TC_83_AGE_23_48YO_VACCINATED_VS_CONTROL_2DY_UP			GSE18791_CTRL_VS_NEWCASTLE_VIRUS_DC_8H_DN	GSE13485_CTRL_VS_DAY7_YF17D_VACCINE_PBMC_DN
GBP1P1	HOWARD_NEUTROPHIL_INACT_MONOV_INFLUENZA_A_INDONESIA_05_2005_H5N1_AGE_18_49YO_1DY_UP	HOWARD_MONOCYTE_INACT_MONOV_INFLUENZA_A_INDONESIA_05_2005_H5N1_AGE_18_49YO_1DY_UP	HOWARD_DENDRITIC_CELL_INACT_MONOV_INFLUENZA_A_INDONESIA_05_2005_H5N1_AGE_18_49YO_1DY_UP	OSMAN_BLOOD_CHAD63_KH_AGE_18_50YO_HIGH_DOSE_SUBJECTS_24HR_UP	HOWARD_PBMC_INACT_MONOV_INFLUENZA_A_INDONESIA_05_2005_H5N1_AGE_19_39YO_AS03_ADJUVANT_VS_BUFFER_1DY_UP
PLAAT4	HOWARD_NEUTROPHIL_INACT_MONOV_INFLUENZA_A_INDONESIA_05_2005_H5N1_AGE_18_49YO_1DY_UP	HOWARD_MONOCYTE_INACT_MONOV_INFLUENZA_A_INDONESIA_05_2005_H5N1_AGE_18_49YO_1DY_UP	HOWARD_DENDRITIC_CELL_INACT_MONOV_INFLUENZA_A_INDONESIA_05_2005_H5N1_AGE_18_49YO_1DY_UP	OSMAN_BLOOD_CHAD63_KH_AGE_18_50YO_HIGH_DOSE_SUBJECTS_24HR_UP				ZAK_PBMC_MRKAD5_HIV_1_GAG_POL_NEF_AGE_20_50YO_1DY_UP
OAS2	HOWARD_NEUTROPHIL_INACT_MONOV_INFLUENZA_A_INDONESIA_05_2005_H5N1_AGE_18_49YO_1DY_UP	HOWARD_MONOCYTE_INACT_MONOV_INFLUENZA_A_INDONESIA_05_2005_H5N1_AGE_18_49YO_1DY_UP		OSMAN_BLOOD_CHAD63_KH_AGE_18_50YO_HIGH_DOSE_SUBJECTS_24HR_UP	HOWARD_PBMC_INACT_MONOV_INFLUENZA_A_INDONESIA_05_2005_H5N1_AGE_19_39YO_AS03_ADJUVANT_VS_BUFFER_1DY_UP	HOWARD_NEUTROPHIL_INACT_MONOV_INFLUENZA_A_INDONESIA_05_2005_H5N1_AGE_18_49YO_3DY_UP	HARALAMBIEVA_PBMC_M_M_R_II_AGE_11_22YO_VACCINATED_VS_UNVACCINATED_7YR_UP	ZAK_PBMC_MRKAD5_HIV_1_GAG_POL_NEF_AGE_20_50YO_1DY_UP	ERWIN_COHEN_BLOOD_TC_83_AGE_23_48YO_VACCINATED_VS_CONTROL_2DY_UP	GAUCHER_PBMC_YF_VAX_STAMARIL_UNKNOWN_AGE_10DY_UP	GAUCHER_PBMC_YF_VAX_STAMARIL_UNKNOWN_AGE_7DY_UP	GSE18791_CTRL_VS_NEWCASTLE_VIRUS_DC_8H_DN	GSE13485_CTRL_VS_DAY7_YF17D_VACCINE_PBMC_DN
IFITM3	HOWARD_NEUTROPHIL_INACT_MONOV_INFLUENZA_A_INDONESIA_05_2005_H5N1_AGE_18_49YO_1DY_UP	HOWARD_MONOCYTE_INACT_MONOV_INFLUENZA_A_INDONESIA_05_2005_H5N1_AGE_18_49YO_1DY_UP		OSMAN_BLOOD_CHAD63_KH_AGE_18_50YO_HIGH_DOSE_SUBJECTS_24HR_UP	HOWARD_PBMC_INACT_MONOV_INFLUENZA_A_INDONESIA_05_2005_H5N1_AGE_19_39YO_AS03_ADJUVANT_VS_BUFFER_1DY_UP	HOWARD_NEUTROPHIL_INACT_MONOV_INFLUENZA_A_INDONESIA_05_2005_H5N1_AGE_18_49YO_3DY_UP	HARALAMBIEVA_PBMC_M_M_R_II_AGE_11_22YO_VACCINATED_VS_UNVACCINATED_7YR_UP	ZAK_PBMC_MRKAD5_HIV_1_GAG_POL_NEF_AGE_20_50YO_1DY_UP		GAUCHER_PBMC_YF_VAX_STAMARIL_UNKNOWN_AGE_10DY_UP	GAUCHER_PBMC_YF_VAX_STAMARIL_UNKNOWN_AGE_7DY_UP	GSE18791_CTRL_VS_NEWCASTLE_VIRUS_DC_8H_DN	GSE13485_CTRL_VS_DAY7_YF17D_VACCINE_PBMC_DN
RTP4	HOWARD_NEUTROPHIL_INACT_MONOV_INFLUENZA_A_INDONESIA_05_2005_H5N1_AGE_18_49YO_1DY_UP	HOWARD_MONOCYTE_INACT_MONOV_INFLUENZA_A_INDONESIA_05_2005_H5N1_AGE_18_49YO_1DY_UP		OSMAN_BLOOD_CHAD63_KH_AGE_18_50YO_HIGH_DOSE_SUBJECTS_24HR_UP	HOWARD_PBMC_INACT_MONOV_INFLUENZA_A_INDONESIA_05_2005_H5N1_AGE_19_39YO_AS03_ADJUVANT_VS_BUFFER_1DY_UP	HOWARD_NEUTROPHIL_INACT_MONOV_INFLUENZA_A_INDONESIA_05_2005_H5N1_AGE_18_49YO_3DY_UP	HARALAMBIEVA_PBMC_M_M_R_II_AGE_11_22YO_VACCINATED_VS_UNVACCINATED_7YR_UP	ZAK_PBMC_MRKAD5_HIV_1_GAG_POL_NEF_AGE_20_50YO_1DY_UP	ERWIN_COHEN_BLOOD_TC_83_AGE_23_48YO_VACCINATED_VS_CONTROL_2DY_UP	GAUCHER_PBMC_YF_VAX_STAMARIL_UNKNOWN_AGE_10DY_UP	GAUCHER_PBMC_YF_VAX_STAMARIL_UNKNOWN_AGE_7DY_UP	GSE18791_CTRL_VS_NEWCASTLE_VIRUS_DC_8H_DN	GSE13485_CTRL_VS_DAY7_YF17D_VACCINE_PBMC_DN
CARD17	HOWARD_NEUTROPHIL_INACT_MONOV_INFLUENZA_A_INDONESIA_05_2005_H5N1_AGE_18_49YO_1DY_UP	HOWARD_MONOCYTE_INACT_MONOV_INFLUENZA_A_INDONESIA_05_2005_H5N1_AGE_18_49YO_1DY_UP		OSMAN_BLOOD_CHAD63_KH_AGE_18_50YO_HIGH_DOSE_SUBJECTS_24HR_UP	HOWARD_PBMC_INACT_MONOV_INFLUENZA_A_INDONESIA_05_2005_H5N1_AGE_19_39YO_AS03_ADJUVANT_VS_BUFFER_1DY_UP	HOWARD_NEUTROPHIL_INACT_MONOV_INFLUENZA_A_INDONESIA_05_2005_H5N1_AGE_18_49YO_3DY_UP	HARALAMBIEVA_PBMC_M_M_R_II_AGE_11_22YO_VACCINATED_VS_UNVACCINATED_7YR_UP
STAT2	HOWARD_NEUTROPHIL_INACT_MONOV_INFLUENZA_A_INDONESIA_05_2005_H5N1_AGE_18_49YO_1DY_UP	HOWARD_MONOCYTE_INACT_MONOV_INFLUENZA_A_INDONESIA_05_2005_H5N1_AGE_18_49YO_1DY_UP		OSMAN_BLOOD_CHAD63_KH_AGE_18_50YO_HIGH_DOSE_SUBJECTS_24HR_UP	HOWARD_PBMC_INACT_MONOV_INFLUENZA_A_INDONESIA_05_2005_H5N1_AGE_19_39YO_AS03_ADJUVANT_VS_BUFFER_1DY_UP		HARALAMBIEVA_PBMC_M_M_R_II_AGE_11_22YO_VACCINATED_VS_UNVACCINATED_7YR_UP	ZAK_PBMC_MRKAD5_HIV_1_GAG_POL_NEF_AGE_20_50YO_1DY_UP	ERWIN_COHEN_BLOOD_TC_83_AGE_23_48YO_VACCINATED_VS_CONTROL_2DY_UP	GAUCHER_PBMC_YF_VAX_STAMARIL_UNKNOWN_AGE_10DY_UP	GAUCHER_PBMC_YF_VAX_STAMARIL_UNKNOWN_AGE_7DY_UP	GSE18791_CTRL_VS_NEWCASTLE_VIRUS_DC_8H_DN	GSE13485_CTRL_VS_DAY7_YF17D_VACCINE_PBMC_DN
IFIT5	HOWARD_NEUTROPHIL_INACT_MONOV_INFLUENZA_A_INDONESIA_05_2005_H5N1_AGE_18_49YO_1DY_UP	HOWARD_MONOCYTE_INACT_MONOV_INFLUENZA_A_INDONESIA_05_2005_H5N1_AGE_18_49YO_1DY_UP		OSMAN_BLOOD_CHAD63_KH_AGE_18_50YO_HIGH_DOSE_SUBJECTS_24HR_UP		HOWARD_NEUTROPHIL_INACT_MONOV_INFLUENZA_A_INDONESIA_05_2005_H5N1_AGE_18_49YO_3DY_UP	HARALAMBIEVA_PBMC_M_M_R_II_AGE_11_22YO_VACCINATED_VS_UNVACCINATED_7YR_UP	ZAK_PBMC_MRKAD5_HIV_1_GAG_POL_NEF_AGE_20_50YO_1DY_UP	ERWIN_COHEN_BLOOD_TC_83_AGE_23_48YO_VACCINATED_VS_CONTROL_2DY_UP	GAUCHER_PBMC_YF_VAX_STAMARIL_UNKNOWN_AGE_10DY_UP	GAUCHER_PBMC_YF_VAX_STAMARIL_UNKNOWN_AGE_7DY_UP	GSE18791_CTRL_VS_NEWCASTLE_VIRUS_DC_8H_DN	GSE13485_CTRL_VS_DAY7_YF17D_VACCINE_PBMC_DN
MOV10	HOWARD_NEUTROPHIL_INACT_MONOV_INFLUENZA_A_INDONESIA_05_2005_H5N1_AGE_18_49YO_1DY_UP			OSMAN_BLOOD_CHAD63_KH_AGE_18_50YO_HIGH_DOSE_SUBJECTS_24HR_UP		HOWARD_NEUTROPHIL_INACT_MONOV_INFLUENZA_A_INDONESIA_05_2005_H5N1_AGE_18_49YO_3DY_UP	HARALAMBIEVA_PBMC_M_M_R_II_AGE_11_22YO_VACCINATED_VS_UNVACCINATED_7YR_UP	ZAK_PBMC_MRKAD5_HIV_1_GAG_POL_NEF_AGE_20_50YO_1DY_UP	ERWIN_COHEN_BLOOD_TC_83_AGE_23_48YO_VACCINATED_VS_CONTROL_2DY_UP	GAUCHER_PBMC_YF_VAX_STAMARIL_UNKNOWN_AGE_10DY_UP	GAUCHER_PBMC_YF_VAX_STAMARIL_UNKNOWN_AGE_7DY_UP	GSE18791_CTRL_VS_NEWCASTLE_VIRUS_DC_8H_DN
SPATS2L	HOWARD_NEUTROPHIL_INACT_MONOV_INFLUENZA_A_INDONESIA_05_2005_H5N1_AGE_18_49YO_1DY_UP			OSMAN_BLOOD_CHAD63_KH_AGE_18_50YO_HIGH_DOSE_SUBJECTS_24HR_UP		HOWARD_NEUTROPHIL_INACT_MONOV_INFLUENZA_A_INDONESIA_05_2005_H5N1_AGE_18_49YO_3DY_UP	HARALAMBIEVA_PBMC_M_M_R_II_AGE_11_22YO_VACCINATED_VS_UNVACCINATED_7YR_UP	ZAK_PBMC_MRKAD5_HIV_1_GAG_POL_NEF_AGE_20_50YO_1DY_UP	ERWIN_COHEN_BLOOD_TC_83_AGE_23_48YO_VACCINATED_VS_CONTROL_2DY_UP	GAUCHER_PBMC_YF_VAX_STAMARIL_UNKNOWN_AGE_10DY_UP	GAUCHER_PBMC_YF_VAX_STAMARIL_UNKNOWN_AGE_7DY_UP		GSE13485_CTRL_VS_DAY7_YF17D_VACCINE_PBMC_DN
DHX58	HOWARD_NEUTROPHIL_INACT_MONOV_INFLUENZA_A_INDONESIA_05_2005_H5N1_AGE_18_49YO_1DY_UP			OSMAN_BLOOD_CHAD63_KH_AGE_18_50YO_HIGH_DOSE_SUBJECTS_24HR_UP		HOWARD_NEUTROPHIL_INACT_MONOV_INFLUENZA_A_INDONESIA_05_2005_H5N1_AGE_18_49YO_3DY_UP	HARALAMBIEVA_PBMC_M_M_R_II_AGE_11_22YO_VACCINATED_VS_UNVACCINATED_7YR_UP	ZAK_PBMC_MRKAD5_HIV_1_GAG_POL_NEF_AGE_20_50YO_1DY_UP		GAUCHER_PBMC_YF_VAX_STAMARIL_UNKNOWN_AGE_10DY_UP	GAUCHER_PBMC_YF_VAX_STAMARIL_UNKNOWN_AGE_7DY_UP	GSE18791_CTRL_VS_NEWCASTLE_VIRUS_DC_8H_DN	GSE13485_CTRL_VS_DAY7_YF17D_VACCINE_PBMC_DN
TMEM268	HOWARD_NEUTROPHIL_INACT_MONOV_INFLUENZA_A_INDONESIA_05_2005_H5N1_AGE_18_49YO_1DY_UP			OSMAN_BLOOD_CHAD63_KH_AGE_18_50YO_HIGH_DOSE_SUBJECTS_24HR_UP		HOWARD_NEUTROPHIL_INACT_MONOV_INFLUENZA_A_INDONESIA_05_2005_H5N1_AGE_18_49YO_3DY_UP	HARALAMBIEVA_PBMC_M_M_R_II_AGE_11_22YO_VACCINATED_VS_UNVACCINATED_7YR_UP	ZAK_PBMC_MRKAD5_HIV_1_GAG_POL_NEF_AGE_20_50YO_1DY_UP	ERWIN_COHEN_BLOOD_TC_83_AGE_23_48YO_VACCINATED_VS_CONTROL_2DY_UP	GAUCHER_PBMC_YF_VAX_STAMARIL_UNKNOWN_AGE_10DY_UP	GAUCHER_PBMC_YF_VAX_STAMARIL_UNKNOWN_AGE_7DY_UP	GSE18791_CTRL_VS_NEWCASTLE_VIRUS_DC_8H_DN
GBP6	HOWARD_NEUTROPHIL_INACT_MONOV_INFLUENZA_A_INDONESIA_05_2005_H5N1_AGE_18_49YO_1DY_UP			OSMAN_BLOOD_CHAD63_KH_AGE_18_50YO_HIGH_DOSE_SUBJECTS_24HR_UP		HOWARD_NEUTROPHIL_INACT_MONOV_INFLUENZA_A_INDONESIA_05_2005_H5N1_AGE_18_49YO_3DY_UP	HARALAMBIEVA_PBMC_M_M_R_II_AGE_11_22YO_VACCINATED_VS_UNVACCINATED_7YR_UP
SAMHD1	HOWARD_NEUTROPHIL_INACT_MONOV_INFLUENZA_A_INDONESIA_05_2005_H5N1_AGE_18_49YO_1DY_UP			OSMAN_BLOOD_CHAD63_KH_AGE_18_50YO_HIGH_DOSE_SUBJECTS_24HR_UP		HOWARD_NEUTROPHIL_INACT_MONOV_INFLUENZA_A_INDONESIA_05_2005_H5N1_AGE_18_49YO_3DY_UP
TIMM10	HOWARD_NEUTROPHIL_INACT_MONOV_INFLUENZA_A_INDONESIA_05_2005_H5N1_AGE_18_49YO_1DY_UP			OSMAN_BLOOD_CHAD63_KH_AGE_18_50YO_HIGH_DOSE_SUBJECTS_24HR_UP		HOWARD_NEUTROPHIL_INACT_MONOV_INFLUENZA_A_INDONESIA_05_2005_H5N1_AGE_18_49YO_3DY_UP				GAUCHER_PBMC_YF_VAX_STAMARIL_UNKNOWN_AGE_10DY_UP	GAUCHER_PBMC_YF_VAX_STAMARIL_UNKNOWN_AGE_7DY_UP
ZNF496	HOWARD_NEUTROPHIL_INACT_MONOV_INFLUENZA_A_INDONESIA_05_2005_H5N1_AGE_18_49YO_1DY_UP			OSMAN_BLOOD_CHAD63_KH_AGE_18_50YO_HIGH_DOSE_SUBJECTS_24HR_UP		HOWARD_NEUTROPHIL_INACT_MONOV_INFLUENZA_A_INDONESIA_05_2005_H5N1_AGE_18_49YO_3DY_UP
TRIM21	HOWARD_NEUTROPHIL_INACT_MONOV_INFLUENZA_A_INDONESIA_05_2005_H5N1_AGE_18_49YO_1DY_UP			OSMAN_BLOOD_CHAD63_KH_AGE_18_50YO_HIGH_DOSE_SUBJECTS_24HR_UP			HARALAMBIEVA_PBMC_M_M_R_II_AGE_11_22YO_VACCINATED_VS_UNVACCINATED_7YR_UP	ZAK_PBMC_MRKAD5_HIV_1_GAG_POL_NEF_AGE_20_50YO_1DY_UP		GAUCHER_PBMC_YF_VAX_STAMARIL_UNKNOWN_AGE_10DY_UP	GAUCHER_PBMC_YF_VAX_STAMARIL_UNKNOWN_AGE_7DY_UP	GSE18791_CTRL_VS_NEWCASTLE_VIRUS_DC_8H_DN
ERAP2	HOWARD_NEUTROPHIL_INACT_MONOV_INFLUENZA_A_INDONESIA_05_2005_H5N1_AGE_18_49YO_1DY_UP			OSMAN_BLOOD_CHAD63_KH_AGE_18_50YO_HIGH_DOSE_SUBJECTS_24HR_UP
NRN1	HOWARD_NEUTROPHIL_INACT_MONOV_INFLUENZA_A_INDONESIA_05_2005_H5N1_AGE_18_49YO_1DY_UP			OSMAN_BLOOD_CHAD63_KH_AGE_18_50YO_HIGH_DOSE_SUBJECTS_24HR_UP
C2		HOWARD_MONOCYTE_INACT_MONOV_INFLUENZA_A_INDONESIA_05_2005_H5N1_AGE_18_49YO_1DY_UP	HOWARD_DENDRITIC_CELL_INACT_MONOV_INFLUENZA_A_INDONESIA_05_2005_H5N1_AGE_18_49YO_1DY_UP	OSMAN_BLOOD_CHAD63_KH_AGE_18_50YO_HIGH_DOSE_SUBJECTS_24HR_UP	HOWARD_PBMC_INACT_MONOV_INFLUENZA_A_INDONESIA_05_2005_H5N1_AGE_19_39YO_AS03_ADJUVANT_VS_BUFFER_1DY_UP		HARALAMBIEVA_PBMC_M_M_R_II_AGE_11_22YO_VACCINATED_VS_UNVACCINATED_7YR_UP	ZAK_PBMC_MRKAD5_HIV_1_GAG_POL_NEF_AGE_20_50YO_1DY_UP					GSE13485_CTRL_VS_DAY7_YF17D_VACCINE_PBMC_DN
TGM2		HOWARD_MONOCYTE_INACT_MONOV_INFLUENZA_A_INDONESIA_05_2005_H5N1_AGE_18_49YO_1DY_UP	HOWARD_DENDRITIC_CELL_INACT_MONOV_INFLUENZA_A_INDONESIA_05_2005_H5N1_AGE_18_49YO_1DY_UP	OSMAN_BLOOD_CHAD63_KH_AGE_18_50YO_HIGH_DOSE_SUBJECTS_24HR_UP	HOWARD_PBMC_INACT_MONOV_INFLUENZA_A_INDONESIA_05_2005_H5N1_AGE_19_39YO_AS03_ADJUVANT_VS_BUFFER_1DY_UP			ZAK_PBMC_MRKAD5_HIV_1_GAG_POL_NEF_AGE_20_50YO_1DY_UP
SOCS3		HOWARD_MONOCYTE_INACT_MONOV_INFLUENZA_A_INDONESIA_05_2005_H5N1_AGE_18_49YO_1DY_UP	HOWARD_DENDRITIC_CELL_INACT_MONOV_INFLUENZA_A_INDONESIA_05_2005_H5N1_AGE_18_49YO_1DY_UP		HOWARD_PBMC_INACT_MONOV_INFLUENZA_A_INDONESIA_05_2005_H5N1_AGE_19_39YO_AS03_ADJUVANT_VS_BUFFER_1DY_UP			ZAK_PBMC_MRKAD5_HIV_1_GAG_POL_NEF_AGE_20_50YO_1DY_UP
ADCY3		HOWARD_MONOCYTE_INACT_MONOV_INFLUENZA_A_INDONESIA_05_2005_H5N1_AGE_18_49YO_1DY_UP
RUFY4			HOWARD_DENDRITIC_CELL_INACT_MONOV_INFLUENZA_A_INDONESIA_05_2005_H5N1_AGE_18_49YO_1DY_UP	OSMAN_BLOOD_CHAD63_KH_AGE_18_50YO_HIGH_DOSE_SUBJECTS_24HR_UP	HOWARD_PBMC_INACT_MONOV_INFLUENZA_A_INDONESIA_05_2005_H5N1_AGE_19_39YO_AS03_ADJUVANT_VS_BUFFER_1DY_UP		HARALAMBIEVA_PBMC_M_M_R_II_AGE_11_22YO_VACCINATED_VS_UNVACCINATED_7YR_UP	ZAK_PBMC_MRKAD5_HIV_1_GAG_POL_NEF_AGE_20_50YO_1DY_UP
AK4			HOWARD_DENDRITIC_CELL_INACT_MONOV_INFLUENZA_A_INDONESIA_05_2005_H5N1_AGE_18_49YO_1DY_UP	OSMAN_BLOOD_CHAD63_KH_AGE_18_50YO_HIGH_DOSE_SUBJECTS_24HR_UP	HOWARD_PBMC_INACT_MONOV_INFLUENZA_A_INDONESIA_05_2005_H5N1_AGE_19_39YO_AS03_ADJUVANT_VS_BUFFER_1DY_UP		HARALAMBIEVA_PBMC_M_M_R_II_AGE_11_22YO_VACCINATED_VS_UNVACCINATED_7YR_UP
LINC00189			HOWARD_DENDRITIC_CELL_INACT_MONOV_INFLUENZA_A_INDONESIA_05_2005_H5N1_AGE_18_49YO_1DY_UP	OSMAN_BLOOD_CHAD63_KH_AGE_18_50YO_HIGH_DOSE_SUBJECTS_24HR_UP			HARALAMBIEVA_PBMC_M_M_R_II_AGE_11_22YO_VACCINATED_VS_UNVACCINATED_7YR_UP
C1QC			HOWARD_DENDRITIC_CELL_INACT_MONOV_INFLUENZA_A_INDONESIA_05_2005_H5N1_AGE_18_49YO_1DY_UP					ZAK_PBMC_MRKAD5_HIV_1_GAG_POL_NEF_AGE_20_50YO_1DY_UP
C1QA				OSMAN_BLOOD_CHAD63_KH_AGE_18_50YO_HIGH_DOSE_SUBJECTS_24HR_UP	HOWARD_PBMC_INACT_MONOV_INFLUENZA_A_INDONESIA_05_2005_H5N1_AGE_19_39YO_AS03_ADJUVANT_VS_BUFFER_1DY_UP						GAUCHER_PBMC_YF_VAX_STAMARIL_UNKNOWN_AGE_7DY_UP
MPEG1				OSMAN_BLOOD_CHAD63_KH_AGE_18_50YO_HIGH_DOSE_SUBJECTS_24HR_UP	HOWARD_PBMC_INACT_MONOV_INFLUENZA_A_INDONESIA_05_2005_H5N1_AGE_19_39YO_AS03_ADJUVANT_VS_BUFFER_1DY_UP
ACTA2				OSMAN_BLOOD_CHAD63_KH_AGE_18_50YO_HIGH_DOSE_SUBJECTS_24HR_UP			HARALAMBIEVA_PBMC_M_M_R_II_AGE_11_22YO_VACCINATED_VS_UNVACCINATED_7YR_UP	ZAK_PBMC_MRKAD5_HIV_1_GAG_POL_NEF_AGE_20_50YO_1DY_UP		GAUCHER_PBMC_YF_VAX_STAMARIL_UNKNOWN_AGE_10DY_UP	GAUCHER_PBMC_YF_VAX_STAMARIL_UNKNOWN_AGE_7DY_UP
GCNT2				OSMAN_BLOOD_CHAD63_KH_AGE_18_50YO_HIGH_DOSE_SUBJECTS_24HR_UP			HARALAMBIEVA_PBMC_M_M_R_II_AGE_11_22YO_VACCINATED_VS_UNVACCINATED_7YR_UP
BTN3A2				OSMAN_BLOOD_CHAD63_KH_AGE_18_50YO_HIGH_DOSE_SUBJECTS_24HR_UP
WSB2				OSMAN_BLOOD_CHAD63_KH_AGE_18_50YO_HIGH_DOSE_SUBJECTS_24HR_UP
COA6				OSMAN_BLOOD_CHAD63_KH_AGE_18_50YO_HIGH_DOSE_SUBJECTS_24HR_UP
PRR11				OSMAN_BLOOD_CHAD63_KH_AGE_18_50YO_HIGH_DOSE_SUBJECTS_24HR_UP
HLA-H				OSMAN_BLOOD_CHAD63_KH_AGE_18_50YO_HIGH_DOSE_SUBJECTS_24HR_UP
FAM110B					HOWARD_PBMC_INACT_MONOV_INFLUENZA_A_INDONESIA_05_2005_H5N1_AGE_19_39YO_AS03_ADJUVANT_VS_BUFFER_1DY_UP
FXYD6							HARALAMBIEVA_PBMC_M_M_R_II_AGE_11_22YO_VACCINATED_VS_UNVACCINATED_7YR_UP	ZAK_PBMC_MRKAD5_HIV_1_GAG_POL_NEF_AGE_20_50YO_1DY_UP
DSP							HARALAMBIEVA_PBMC_M_M_R_II_AGE_11_22YO_VACCINATED_VS_UNVACCINATED_7YR_UP
ST14								ZAK_PBMC_MRKAD5_HIV_1_GAG_POL_NEF_AGE_20_50YO_1DY_UP

## Sheet: Gene families
	cytokines and growth factors	transcription factors	homeodomain proteins	cell differentiation markers	protein kinases	translocated cancer genes	oncogenes	tumor suppressors
tumor suppressors	0	0	0	0	0	0	0	0
oncogenes	1	0	0	1	1	1	1
translocated cancer genes	1	0	0	1	1	1
protein kinases	1	0	0	1	1
cell differentiation markers	1	0	0	4
homeodomain proteins	0	0	0
transcription factors	0	4
cytokines and growth factors	1
	PDGFRB	ETV7		CD101	PDGFRB	PDGFRB	PDGFRB
		KLF11		CD274
		STAT1		FCGR1A
		STAT2		PDGFRB

## Sheet: ranked gene
NAME	SCORE	TITLE
LONRF2	2.46785	LON peptidase N+terminal domain and ring finger 2 [Source:HGNC Symbol;Acc:HGNC:24788]
HNF1A	2.01059	HNF1 homeobox A [Source:HGNC Symbol;Acc:HGNC:11621]
MT1F	1.97642	metallothionein 1F [Source:HGNC Symbol;Acc:HGNC:7398]
CSPG5	1.89105	chondroitin sulfate proteoglycan 5 [Source:HGNC Symbol;Acc:HGNC:2467]
IFITM5	1.87294	interferon induced transmembrane protein 5 [Source:HGNC Symbol;Acc:HGNC:16644]
CHDH	1.82147	choline dehydrogenase [Source:HGNC Symbol;Acc:HGNC:24288]
LAYN	1.81057	layilin [Source:HGNC Symbol;Acc:HGNC:29471]
C7	1.75289	complement C7 [Source:HGNC Symbol;Acc:HGNC:1346]
ZNHIT2	1.71618	zinc finger HIT+type containing 2 [Source:HGNC Symbol;Acc:HGNC:1177]
LIF	1.68945	LIF interleukin 6 family cytokine [Source:HGNC Symbol;Acc:HGNC:6596]
SRCIN1	1.67824	SRC kinase signaling inhibitor 1 [Source:HGNC Symbol;Acc:HGNC:29506]
CEL	1.64627	carboxyl ester lipase [Source:HGNC Symbol;Acc:HGNC:1848]
FRMD7	1.62744	FERM domain containing 7 [Source:HGNC Symbol;Acc:HGNC:8079]
C9orf152	1.62016	chromosome 9 open reading frame 152 [Source:HGNC Symbol;Acc:HGNC:31455]
HIGD1B	1.61297	HIG1 hypoxia inducible domain family member 1B [Source:HGNC Symbol;Acc:HGNC:24318]
DDIT4L	1.59966	DNA damage inducible transcript 4 like [Source:HGNC Symbol;Acc:HGNC:30555]
FASN	1.57681	fatty acid synthase [Source:HGNC Symbol;Acc:HGNC:3594]
KLHL17	1.57159	kelch like family member 17 [Source:HGNC Symbol;Acc:HGNC:24023]
POLD1	1.56698	DNA polymerase delta 1, catalytic subunit [Source:HGNC Symbol;Acc:HGNC:9175]
SLC52A2	1.53626	solute carrier family 52 member 2 [Source:HGNC Symbol;Acc:HGNC:30224]
CLEC4G	1.49153	C+type lectin domain family 4 member G [Source:HGNC Symbol;Acc:HGNC:24591]
EPSTI1	1.48506	epithelial stromal interaction 1 [Source:HGNC Symbol;Acc:HGNC:16465]
LYNX1	1.47546	Ly6/neurotoxin 1 [Source:HGNC Symbol;Acc:HGNC:29604]
DNER	1.47242	delta/notch like EGF repeat containing [Source:HGNC Symbol;Acc:HGNC:24456]
LGALS3BP	1.4669	galectin 3 binding protein [Source:HGNC Symbol;Acc:HGNC:6564]
RHBDF1	1.45582	rhomboid 5 homolog 1 [Source:HGNC Symbol;Acc:HGNC:20561]
UBE2L6	1.45054	ubiquitin conjugating enzyme E2 L6 [Source:HGNC Symbol;Acc:HGNC:12490]
TELO2	1.43501	telomere maintenance 2 [Source:HGNC Symbol;Acc:HGNC:29099]
MRPL44	1.42939	mitochondrial ribosomal protein L44 [Source:HGNC Symbol;Acc:HGNC:16650]
WIPF3	1.42922	WAS/WASL interacting protein family member 3 [Source:HGNC Symbol;Acc:HGNC:22004]
RIPK2	1.39968	receptor interacting serine/threonine kinase 2 [Source:HGNC Symbol;Acc:HGNC:10020]
TMPRSS2	1.39917	transmembrane serine protease 2 [Source:HGNC Symbol;Acc:HGNC:11876]
RUVBL2	1.39478	RuvB like AAA ATPase 2 [Source:HGNC Symbol;Acc:HGNC:10475]
DEAF1	1.39336	DEAF1 transcription factor [Source:HGNC Symbol;Acc:HGNC:14677]
NDUFB7	1.38664	NADH:ubiquinone oxidoreductase subunit B7 [Source:HGNC Symbol;Acc:HGNC:7702]
MICALL2	1.37963	MICAL like 2 [Source:HGNC Symbol;Acc:HGNC:29672]
RRAS	1.37	RAS related [Source:HGNC Symbol;Acc:HGNC:10447]
DUS3L	1.36625	dihydrouridine synthase 3 like [Source:HGNC Symbol;Acc:HGNC:26920]
NOD1	1.36464	nucleotide binding oligomerization domain containing 1 [Source:HGNC Symbol;Acc:HGNC:16390]
ZNF408	1.3617	zinc finger protein 408 [Source:HGNC Symbol;Acc:HGNC:20041]
DTYMK	1.36065	deoxythymidylate kinase [Source:HGNC Symbol;Acc:HGNC:3061]
OR52M1	1.35936	olfactory receptor family 52 subfamily M member 1 [Source:HGNC Symbol;Acc:HGNC:15225]
FAM71A	1.34674	family with sequence similarity 71 member A [Source:HGNC Symbol;Acc:HGNC:26541]
ROMO1	1.34507	reactive oxygen species modulator 1 [Source:HGNC Symbol;Acc:HGNC:16185]
CORO1B	1.33964	coronin 1B [Source:HGNC Symbol;Acc:HGNC:2253]
APBA3	1.33348	amyloid beta precursor protein binding family A member 3 [Source:HGNC Symbol;Acc:HGNC:580]
CXCL12	1.33084	C+X+C motif chemokine ligand 12 [Source:HGNC Symbol;Acc:HGNC:10672]
SERPING1	1.32661	serpin family G member 1 [Source:HGNC Symbol;Acc:HGNC:1228]
PLVAP	1.31843	plasmalemma vesicle associated protein [Source:HGNC Symbol;Acc:HGNC:13635]
GSDMD	1.31672	gasdermin D [Source:HGNC Symbol;Acc:HGNC:25697]
SNX8	1.31459	sorting nexin 8 [Source:HGNC Symbol;Acc:HGNC:14972]
CHSY3	1.31289	chondroitin sulfate synthase 3 [Source:HGNC Symbol;Acc:HGNC:24293]
IL17B	1.30218	interleukin 17B [Source:HGNC Symbol;Acc:HGNC:5982]
BRI3BP	1.30074	BRI3 binding protein [Source:HGNC Symbol;Acc:HGNC:14251]
PHPT1	1.29676	phosphohistidine phosphatase 1 [Source:HGNC Symbol;Acc:HGNC:30033]
SLC25A22	1.29103	solute carrier family 25 member 22 [Source:HGNC Symbol;Acc:HGNC:19954]
HSPA12A	1.28147	heat shock protein family A (Hsp70) member 12A [Source:HGNC Symbol;Acc:HGNC:19022]
RASL11A	1.28114	RAS like family 11 member A [Source:HGNC Symbol;Acc:HGNC:23802]
HAMP	1.27587	hepcidin antimicrobial peptide [Source:HGNC Symbol;Acc:HGNC:15598]
CCDC124	1.27581	coiled+coil domain containing 124 [Source:HGNC Symbol;Acc:HGNC:25171]
CHAC1	1.27516	ChaC glutathione specific gamma+glutamylcyclotransferase 1 [Source:HGNC Symbol;Acc:HGNC:28680]
TMEM123	1.27434	transmembrane protein 123 [Source:HGNC Symbol;Acc:HGNC:30138]
PPP1R16A	1.27394	protein phosphatase 1 regulatory subunit 16A [Source:HGNC Symbol;Acc:HGNC:14941]
MT1X	1.27078	metallothionein 1X [Source:HGNC Symbol;Acc:HGNC:7405]
EVA1B	1.27066	eva+1 homolog B [Source:HGNC Symbol;Acc:HGNC:25558]
KRTAP5+8	1.26331	keratin associated protein 5+8 [Source:HGNC Symbol;Acc:HGNC:23603]
NTSR1	1.25828	neurotensin receptor 1 [Source:HGNC Symbol;Acc:HGNC:8039]
PALMD	1.25111	palmdelphin [Source:HGNC Symbol;Acc:HGNC:15846]
CRIP2	1.24948	cysteine rich protein 2 [Source:HGNC Symbol;Acc:HGNC:2361]
KCTD15	1.24899	potassium channel tetramerization domain containing 15 [Source:HGNC Symbol;Acc:HGNC:23297]
C15orf65	1.2479	chromosome 15 open reading frame 65 [Source:HGNC Symbol;Acc:HGNC:44654]
HERC5	1.23263	HECT and RLD domain containing E3 ubiquitin protein ligase 5 [Source:HGNC Symbol;Acc:HGNC:24368]
MVB12A	1.22943	multivesicular body subunit 12A [Source:HGNC Symbol;Acc:HGNC:25153]
HES4	1.22622	hes family bHLH transcription factor 4 [Source:HGNC Symbol;Acc:HGNC:24149]
ZACN	1.22585	zinc activated ion channel [Source:HGNC Symbol;Acc:HGNC:29504]
DNAJC1	1.22162	DnaJ heat shock protein family (Hsp40) member C1 [Source:HGNC Symbol;Acc:HGNC:20090]
WDR90	1.22153	WD repeat domain 90 [Source:HGNC Symbol;Acc:HGNC:26960]
LY6E	1.22022	lymphocyte antigen 6 family member E [Source:HGNC Symbol;Acc:HGNC:6727]
RASL11B	1.21582	RAS like family 11 member B [Source:HGNC Symbol;Acc:HGNC:23804]
NUB1	1.21258	negative regulator of ubiquitin like proteins 1 [Source:HGNC Symbol;Acc:HGNC:17623]
APOL2	1.20908	apolipoprotein L2 [Source:HGNC Symbol;Acc:HGNC:619]
BST2	1.20897	bone marrow stromal cell antigen 2 [Source:HGNC Symbol;Acc:HGNC:1119]
PSMB9	1.20214	proteasome 20S subunit beta 9 [Source:HGNC Symbol;Acc:HGNC:9546]
CHRM4	1.19768	cholinergic receptor muscarinic 4 [Source:HGNC Symbol;Acc:HGNC:1953]
GRHPR	1.19415	glyoxylate and hydroxypyruvate reductase [Source:HGNC Symbol;Acc:HGNC:4570]
ADAMTS13	1.18622	ADAM metallopeptidase with thrombospondin type 1 motif 13 [Source:HGNC Symbol;Acc:HGNC:1366]
MYL6B	1.18535	myosin light chain 6B [Source:HGNC Symbol;Acc:HGNC:29823]
THAP7	1.18485	THAP domain containing 7 [Source:HGNC Symbol;Acc:HGNC:23190]
CENPO	1.18411	centromere protein O [Source:HGNC Symbol;Acc:HGNC:28152]
MT2A	1.18353	metallothionein 2A [Source:HGNC Symbol;Acc:HGNC:7406]
LDLR	1.18229	low density lipoprotein receptor [Source:HGNC Symbol;Acc:HGNC:6547]
TAGLN	1.17852	transgelin [Source:HGNC Symbol;Acc:HGNC:11553]
NES	1.17764	nestin [Source:HGNC Symbol;Acc:HGNC:7756]
KPTN	1.17596	kaptin, actin binding protein [Source:HGNC Symbol;Acc:HGNC:6404]
WDFY1	1.1747	WD repeat and FYVE domain containing 1 [Source:HGNC Symbol;Acc:HGNC:20451]
FUOM	1.17048	fucose mutarotase [Source:HGNC Symbol;Acc:HGNC:24733]
YIPF2	1.16951	Yip1 domain family member 2 [Source:HGNC Symbol;Acc:HGNC:28476]
IFI35	1.16869	interferon induced protein 35 [Source:HGNC Symbol;Acc:HGNC:5399]
SLC25A10	1.16776	solute carrier family 25 member 10 [Source:HGNC Symbol;Acc:HGNC:10980]
APOBEC3B	1.16467	apolipoprotein B mRNA editing enzyme catalytic subunit 3B [Source:HGNC Symbol;Acc:HGNC:17352]
HSBP1L1	1.15972	heat shock factor binding protein 1 like 1 [Source:HGNC Symbol;Acc:HGNC:37243]
ATAD3B	1.15829	ATPase family AAA domain containing 3B [Source:HGNC Symbol;Acc:HGNC:24007]
ERVFRD+1	1.15739	endogenous retrovirus group FRD member 1, envelope [Source:HGNC Symbol;Acc:HGNC:33823]
GAS6	1.15678	growth arrest specific 6 [Source:HGNC Symbol;Acc:HGNC:4168]
FAP	1.15637	fibroblast activation protein alpha [Source:HGNC Symbol;Acc:HGNC:3590]
TPBGL	1.15633	trophoblast glycoprotein like [Source:HGNC Symbol;Acc:HGNC:44159]
GPS1	1.15568	G protein pathway suppressor 1 [Source:HGNC Symbol;Acc:HGNC:4549]
ZFHX2	1.15179	zinc finger homeobox 2 [Source:HGNC Symbol;Acc:HGNC:20152]
C16orf74	1.15056	chromosome 16 open reading frame 74 [Source:HGNC Symbol;Acc:HGNC:23362]
SOCS3	1.14994	suppressor of cytokine signaling 3 [Source:HGNC Symbol;Acc:HGNC:19391]
RASSF7	1.14883	Ras association domain family member 7 [Source:HGNC Symbol;Acc:HGNC:1166]
CXCL17	1.14742	C+X+C motif chemokine ligand 17 [Source:HGNC Symbol;Acc:HGNC:19232]
MMP25	1.14652	matrix metallopeptidase 25 [Source:HGNC Symbol;Acc:HGNC:14246]
SPRY2	1.1439	sprouty RTK signaling antagonist 2 [Source:HGNC Symbol;Acc:HGNC:11270]
OSGIN1	1.1416	oxidative stress induced growth inhibitor 1 [Source:HGNC Symbol;Acc:HGNC:30093]
TAP2	1.13745	transporter 2, ATP binding cassette subfamily B member [Source:HGNC Symbol;Acc:HGNC:44]
TSPAN17	1.13231	tetraspanin 17 [Source:HGNC Symbol;Acc:HGNC:13594]
ISG15	1.1312	ISG15 ubiquitin like modifier [Source:HGNC Symbol;Acc:HGNC:4053]
THAP4	1.12952	THAP domain containing 4 [Source:HGNC Symbol;Acc:HGNC:23187]
PSME1	1.12892	proteasome activator subunit 1 [Source:HGNC Symbol;Acc:HGNC:9568]
OR52B6	1.12777	olfactory receptor family 52 subfamily B member 6 [Source:HGNC Symbol;Acc:HGNC:15211]
APC2	1.12605	APC regulator of WNT signaling pathway 2 [Source:HGNC Symbol;Acc:HGNC:24036]
PNLDC1	1.12465	PARN like, ribonuclease domain containing 1 [Source:HGNC Symbol;Acc:HGNC:21185]
POLR2F	1.12301	RNA polymerase II, I and III subunit F [Source:HGNC Symbol;Acc:HGNC:9193]
WDR25	1.11989	WD repeat domain 25 [Source:HGNC Symbol;Acc:HGNC:21064]
PML	1.1182	PML nuclear body scaffold [Source:HGNC Symbol;Acc:HGNC:9113]
SAMD1	1.11801	sterile alpha motif domain containing 1 [Source:HGNC Symbol;Acc:HGNC:17958]
MOV10	1.11631	Mov10 RISC complex RNA helicase [Source:HGNC Symbol;Acc:HGNC:7200]
SCRN2	1.11334	secernin 2 [Source:HGNC Symbol;Acc:HGNC:30381]
SGO1	1.11299	shugoshin 1 [Source:HGNC Symbol;Acc:HGNC:25088]
ZC3H3	1.11201	zinc finger CCCH+type containing 3 [Source:HGNC Symbol;Acc:HGNC:28972]
GBP4	1.10966	guanylate binding protein 4 [Source:HGNC Symbol;Acc:HGNC:20480]
OAS3	1.10808	2'+5'+oligoadenylate synthetase 3 [Source:HGNC Symbol;Acc:HGNC:8088]
PPIAL4G	1.10797	peptidylprolyl isomerase A like 4G [Source:HGNC Symbol;Acc:HGNC:33996]
ZNF496	1.10595	zinc finger protein 496 [Source:HGNC Symbol;Acc:HGNC:23713]
FRMD3	1.10335	FERM domain containing 3 [Source:HGNC Symbol;Acc:HGNC:24125]
GBP6	1.10305	guanylate binding protein family member 6 [Source:HGNC Symbol;Acc:HGNC:25395]
DGCR6L	1.10302	DiGeorge syndrome critical region gene 6 like [Source:HGNC Symbol;Acc:HGNC:18551]
IFI6	1.10271	interferon alpha inducible protein 6 [Source:HGNC Symbol;Acc:HGNC:4054]
ACRV1	1.0974	acrosomal vesicle protein 1 [Source:HGNC Symbol;Acc:HGNC:127]
MTG2	1.0925	mitochondrial ribosome associated GTPase 2 [Source:HGNC Symbol;Acc:HGNC:16239]
RHBDL2	1.08605	rhomboid like 2 [Source:HGNC Symbol;Acc:HGNC:16083]
ZCCHC2	1.08386	zinc finger CCHC+type containing 2 [Source:HGNC Symbol;Acc:HGNC:22916]
NPPB	1.08253	natriuretic peptide B [Source:HGNC Symbol;Acc:HGNC:7940]
ACAN	1.08225	aggrecan [Source:HGNC Symbol;Acc:HGNC:319]
MX1	1.08173	MX dynamin like GTPase 1 [Source:HGNC Symbol;Acc:HGNC:7532]
OMD	1.07868	osteomodulin [Source:HGNC Symbol;Acc:HGNC:8134]
CTSG	1.07677	cathepsin G [Source:HGNC Symbol;Acc:HGNC:2532]
MLXIPL	1.07586	MLX interacting protein like [Source:HGNC Symbol;Acc:HGNC:12744]
EXOC3L1	1.07542	exocyst complex component 3 like 1 [Source:HGNC Symbol;Acc:HGNC:27540]
HSH2D	1.0749	hematopoietic SH2 domain containing [Source:HGNC Symbol;Acc:HGNC:24920]
MRPL23	1.07043	mitochondrial ribosomal protein L23 [Source:HGNC Symbol;Acc:HGNC:10322]
CCDC134	1.06997	coiled+coil domain containing 134 [Source:HGNC Symbol;Acc:HGNC:26185]
LBX2	1.0696	ladybird homeobox 2 [Source:HGNC Symbol;Acc:HGNC:15525]
RHOV	1.06957	ras homolog family member V [Source:HGNC Symbol;Acc:HGNC:18313]
PRSS27	1.06941	serine protease 27 [Source:HGNC Symbol;Acc:HGNC:15475]
AIFM3	1.0691	apoptosis inducing factor mitochondria associated 3 [Source:HGNC Symbol;Acc:HGNC:26398]
DPP3	1.0684	dipeptidyl peptidase 3 [Source:HGNC Symbol;Acc:HGNC:3008]
RBCK1	1.06524	RANBP2+type and C3HC4+type zinc finger containing 1 [Source:HGNC Symbol;Acc:HGNC:15864]
IL12RB1	1.06457	interleukin 12 receptor subunit beta 1 [Source:HGNC Symbol;Acc:HGNC:5971]
ELANE	1.06423	elastase, neutrophil expressed [Source:HGNC Symbol;Acc:HGNC:3309]
WFDC3	1.06279	WAP four+disulfide core domain 3 [Source:HGNC Symbol;Acc:HGNC:15957]
CCND1	1.06262	cyclin D1 [Source:HGNC Symbol;Acc:HGNC:1582]
RLBP1	1.0613	retinaldehyde binding protein 1 [Source:HGNC Symbol;Acc:HGNC:10024]
SLC37A1	1.06061	solute carrier family 37 member 1 [Source:HGNC Symbol;Acc:HGNC:11024]
VAT1	1.05909	vesicle amine transport 1 [Source:HGNC Symbol;Acc:HGNC:16919]
C16orf95	1.05895	chromosome 16 open reading frame 95 [Source:HGNC Symbol;Acc:HGNC:40033]
TAS2R60	1.05788	taste 2 receptor member 60 [Source:HGNC Symbol;Acc:HGNC:20639]
DNPH1	1.05659	2'+deoxynucleoside 5'+phosphate N+hydrolase 1 [Source:HGNC Symbol;Acc:HGNC:21218]
CDCA8	1.05603	cell division cycle associated 8 [Source:HGNC Symbol;Acc:HGNC:14629]
SPRY4	1.0557	sprouty RTK signaling antagonist 4 [Source:HGNC Symbol;Acc:HGNC:15533]
TMC1	1.05528	transmembrane channel like 1 [Source:HGNC Symbol;Acc:HGNC:16513]
RAPSN	1.0535	receptor associated protein of the synapse [Source:HGNC Symbol;Acc:HGNC:9863]
SEMA6B	1.05298	semaphorin 6B [Source:HGNC Symbol;Acc:HGNC:10739]
SLC22A18	1.05286	solute carrier family 22 member 18 [Source:HGNC Symbol;Acc:HGNC:10964]
UQCR10	1.04596	ubiquinol+cytochrome c reductase, complex III subunit X [Source:HGNC Symbol;Acc:HGNC:30863]
A4GNT	1.0445	alpha+1,4+N+acetylglucosaminyltransferase [Source:HGNC Symbol;Acc:HGNC:17968]
ADCY3	1.04286	adenylate cyclase 3 [Source:HGNC Symbol;Acc:HGNC:234]
NRL	1.0416	neural retina leucine zipper [Source:HGNC Symbol;Acc:HGNC:8002]
B3GNT3	1.03939	UDP+GlcNAc:betaGal beta+1,3+N+acetylglucosaminyltransferase 3 [Source:HGNC Symbol;Acc:HGNC:13528]
SPDEF	1.03557	SAM pointed domain containing ETS transcription factor [Source:HGNC Symbol;Acc:HGNC:17257]
GSG1	1.03429	germ cell associated 1 [Source:HGNC Symbol;Acc:HGNC:19716]
C1GALT1	1.03343	core 1 synthase, glycoprotein+N+acetylgalactosamine 3+beta+galactosyltransferase 1 [Source:HGNC Symbol;Acc:HGNC:24337]
AGRN	1.03232	agrin [Source:HGNC Symbol;Acc:HGNC:329]
ZNF574	1.0322	zinc finger protein 574 [Source:HGNC Symbol;Acc:HGNC:26166]
TIMELESS	1.03186	timeless circadian regulator [Source:HGNC Symbol;Acc:HGNC:11813]
OR2L2	1.03122	olfactory receptor family 2 subfamily L member 2 [Source:HGNC Symbol;Acc:HGNC:8266]
VAMP5	1.03064	vesicle associated membrane protein 5 [Source:HGNC Symbol;Acc:HGNC:12646]
NMI	1.03048	N+myc and STAT interactor [Source:HGNC Symbol;Acc:HGNC:7854]
CHAF1A	1.02932	chromatin assembly factor 1 subunit A [Source:HGNC Symbol;Acc:HGNC:1910]
TEX29	1.02841	testis expressed 29 [Source:HGNC Symbol;Acc:HGNC:20370]
GBP7	1.02704	guanylate binding protein 7 [Source:HGNC Symbol;Acc:HGNC:29606]
GCNT2	1.02652	glucosaminyl (N+acetyl) transferase 2 (I blood group) [Source:HGNC Symbol;Acc:HGNC:4204]
LAMP3	1.0263	lysosomal associated membrane protein 3 [Source:HGNC Symbol;Acc:HGNC:14582]
CLCN7	1.02514	chloride voltage+gated channel 7 [Source:HGNC Symbol;Acc:HGNC:2025]
PKN1	1.02479	protein kinase N1 [Source:HGNC Symbol;Acc:HGNC:9405]
ASB15	1.02324	ankyrin repeat and SOCS box containing 15 [Source:HGNC Symbol;Acc:HGNC:19767]
CKS1B	1.02236	CDC28 protein kinase regulatory subunit 1B [Source:HGNC Symbol;Acc:HGNC:19083]
RSAD2	1.02162	radical S+adenosyl methionine domain containing 2 [Source:HGNC Symbol;Acc:HGNC:30908]
COX8A	1.01682	cytochrome c oxidase subunit 8A [Source:HGNC Symbol;Acc:HGNC:2294]
UCN	1.01631	urocortin [Source:HGNC Symbol;Acc:HGNC:12516]
ASPSCR1	1.01576	ASPSCR1 tether for SLC2A4, UBX domain containing [Source:HGNC Symbol;Acc:HGNC:13825]
RPL36	1.01413	ribosomal protein L36 [Source:HGNC Symbol;Acc:HGNC:13631]
NEUROD4	1.01378	neuronal differentiation 4 [Source:HGNC Symbol;Acc:HGNC:13802]
ZNF317	1.01246	zinc finger protein 317 [Source:HGNC Symbol;Acc:HGNC:13507]
RCE1	1.01242	Ras converting CAAX endopeptidase 1 [Source:HGNC Symbol;Acc:HGNC:13721]
MED9	1.01221	mediator complex subunit 9 [Source:HGNC Symbol;Acc:HGNC:25487]
ECSIT	1.01157	ECSIT signaling integrator [Source:HGNC Symbol;Acc:HGNC:29548]
DDX58	1.00875	DExD/H+box helicase 58 [Source:HGNC Symbol;Acc:HGNC:19102]
BTBD2	1.0055	BTB domain containing 2 [Source:HGNC Symbol;Acc:HGNC:15504]
PLSCR4	1.00541	phospholipid scramblase 4 [Source:HGNC Symbol;Acc:HGNC:16497]
NAPA	1.00204	NSF attachment protein alpha [Source:HGNC Symbol;Acc:HGNC:7641]
IFIH1	0.999824	interferon induced with helicase C domain 1 [Source:HGNC Symbol;Acc:HGNC:18873]
AFF2	0.999196	AF4/FMR2 family member 2 [Source:HGNC Symbol;Acc:HGNC:3776]
EHF	0.996707	ETS homologous factor [Source:HGNC Symbol;Acc:HGNC:3246]
CNP	0.996602	2',3'+cyclic nucleotide 3' phosphodiesterase [Source:HGNC Symbol;Acc:HGNC:2158]
TIMM10	0.995263	translocase of inner mitochondrial membrane 10 [Source:HGNC Symbol;Acc:HGNC:11814]
SCAND1	0.993576	SCAN domain containing 1 [Source:HGNC Symbol;Acc:HGNC:10566]
IL23A	0.992982	interleukin 23 subunit alpha [Source:HGNC Symbol;Acc:HGNC:15488]
SPATA5L1	0.991645	spermatogenesis associated 5 like 1 [Source:HGNC Symbol;Acc:HGNC:28762]
POU2F3	0.99097	POU class 2 homeobox 3 [Source:HGNC Symbol;Acc:HGNC:19864]
IL34	0.990718	interleukin 34 [Source:HGNC Symbol;Acc:HGNC:28529]
TEKT2	0.988439	tektin 2 [Source:HGNC Symbol;Acc:HGNC:11725]
RSPO4	0.987169	R+spondin 4 [Source:HGNC Symbol;Acc:HGNC:16175]
ROR2	0.986742	receptor tyrosine kinase like orphan receptor 2 [Source:HGNC Symbol;Acc:HGNC:10257]
PARP9	0.985441	poly(ADP+ribose) polymerase family member 9 [Source:HGNC Symbol;Acc:HGNC:24118]
SMTNL1	0.985032	smoothelin like 1 [Source:HGNC Symbol;Acc:HGNC:32394]
CYP2W1	0.984177	cytochrome P450 family 2 subfamily W member 1 [Source:HGNC Symbol;Acc:HGNC:20243]
ZBED9	0.984044	zinc finger BED+type containing 9 [Source:HGNC Symbol;Acc:HGNC:13851]
UNC5B	0.98276	unc+5 netrin receptor B [Source:HGNC Symbol;Acc:HGNC:12568]
PARP12	0.982585	poly(ADP+ribose) polymerase family member 12 [Source:HGNC Symbol;Acc:HGNC:21919]
TYMS	0.982532	thymidylate synthetase [Source:HGNC Symbol;Acc:HGNC:12441]
PSMB8	0.982458	proteasome 20S subunit beta 8 [Source:HGNC Symbol;Acc:HGNC:9545]
MAL2	0.981556	mal, T cell differentiation protein 2 [Source:HGNC Symbol;Acc:HGNC:13634]
ATP2B2	0.980608	ATPase plasma membrane Ca2+ transporting 2 [Source:HGNC Symbol;Acc:HGNC:815]
TTC36	0.98011	tetratricopeptide repeat domain 36 [Source:HGNC Symbol;Acc:HGNC:33708]
SHANK2	0.979664	SH3 and multiple ankyrin repeat domains 2 [Source:HGNC Symbol;Acc:HGNC:14295]
AURKB	0.979488	aurora kinase B [Source:HGNC Symbol;Acc:HGNC:11390]
IFITM3	0.978003	interferon induced transmembrane protein 3 [Source:HGNC Symbol;Acc:HGNC:5414]
ATP13A1	0.977059	ATPase 13A1 [Source:HGNC Symbol;Acc:HGNC:24215]
NKD1	0.976322	NKD inhibitor of WNT signaling pathway 1 [Source:HGNC Symbol;Acc:HGNC:17045]
CMPK2	0.975583	cytidine/uridine monophosphate kinase 2 [Source:HGNC Symbol;Acc:HGNC:27015]
NUDT14	0.975217	nudix hydrolase 14 [Source:HGNC Symbol;Acc:HGNC:20141]
FADS2	0.974483	fatty acid desaturase 2 [Source:HGNC Symbol;Acc:HGNC:3575]
SYNGR2	0.9733	synaptogyrin 2 [Source:HGNC Symbol;Acc:HGNC:11499]
SEPTIN4	0.973275	septin 4 [Source:HGNC Symbol;Acc:HGNC:9165]
LIME1	0.973181	Lck interacting transmembrane adaptor 1 [Source:HGNC Symbol;Acc:HGNC:26016]
ZNF442	0.971025	zinc finger protein 442 [Source:HGNC Symbol;Acc:HGNC:20877]
PKHD1	0.970885	PKHD1 ciliary IPT domain containing fibrocystin/polyductin [Source:HGNC Symbol;Acc:HGNC:9016]
GRAMD1B	0.970706	GRAM domain containing 1B [Source:HGNC Symbol;Acc:HGNC:29214]
NDUFA13	0.969936	NADH:ubiquinone oxidoreductase subunit A13 [Source:HGNC Symbol;Acc:HGNC:17194]
FGF11	0.968365	fibroblast growth factor 11 [Source:HGNC Symbol;Acc:HGNC:3667]
IRF7	0.967088	interferon regulatory factor 7 [Source:HGNC Symbol;Acc:HGNC:6122]
IDH2	0.967069	isocitrate dehydrogenase (NADP(+)) 2 [Source:HGNC Symbol;Acc:HGNC:5383]
SERPINB10	0.966608	serpin family B member 10 [Source:HGNC Symbol;Acc:HGNC:8942]
UBQLNL	0.966422	ubiquilin like [Source:HGNC Symbol;Acc:HGNC:28294]
ODF3B	0.96596	outer dense fiber of sperm tails 3B [Source:HGNC Symbol;Acc:HGNC:34388]
SHISA5	0.965146	shisa family member 5 [Source:HGNC Symbol;Acc:HGNC:30376]
PFKL	0.962788	phosphofructokinase, liver type [Source:HGNC Symbol;Acc:HGNC:8876]
PARP10	0.962618	poly(ADP+ribose) polymerase family member 10 [Source:HGNC Symbol;Acc:HGNC:25895]
FBXO6	0.962375	F+box protein 6 [Source:HGNC Symbol;Acc:HGNC:13585]
UNC5C	0.960743	unc+5 netrin receptor C [Source:HGNC Symbol;Acc:HGNC:12569]
PERM1	0.959983	PPARGC1 and ESRR induced regulator, muscle 1 [Source:HGNC Symbol;Acc:HGNC:28208]
HJURP	0.955359	Holliday junction recognition protein [Source:HGNC Symbol;Acc:HGNC:25444]
SLC45A1	0.955085	solute carrier family 45 member 1 [Source:HGNC Symbol;Acc:HGNC:17939]
FAM89B	0.954347	family with sequence similarity 89 member B [Source:HGNC Symbol;Acc:HGNC:16708]
GJA1	0.954259	gap junction protein alpha 1 [Source:HGNC Symbol;Acc:HGNC:4274]
SPC24	0.950116	SPC24 component of NDC80 kinetochore complex [Source:HGNC Symbol;Acc:HGNC:26913]
NBPF1	0.950103	NBPF member 1 [Source:HGNC Symbol;Acc:HGNC:26088]
TTLL9	0.947074	tubulin tyrosine ligase like 9 [Source:HGNC Symbol;Acc:HGNC:16118]
CDHR5	0.946916	cadherin related family member 5 [Source:HGNC Symbol;Acc:HGNC:7521]
TREX1	0.946548	three prime repair exonuclease 1 [Source:HGNC Symbol;Acc:HGNC:12269]
SP7	0.946082	Sp7 transcription factor [Source:HGNC Symbol;Acc:HGNC:17321]
ESPL1	0.945648	extra spindle pole bodies like 1, separase [Source:HGNC Symbol;Acc:HGNC:16856]
GSTP1	0.943912	glutathione S+transferase pi 1 [Source:HGNC Symbol;Acc:HGNC:4638]
OASL	0.942982	2'+5'+oligoadenylate synthetase like [Source:HGNC Symbol;Acc:HGNC:8090]
MCM5	0.942426	minichromosome maintenance complex component 5 [Source:HGNC Symbol;Acc:HGNC:6948]
C1orf159	0.942313	chromosome 1 open reading frame 159 [Source:HGNC Symbol;Acc:HGNC:26062]
ACO1	0.942211	aconitase 1 [Source:HGNC Symbol;Acc:HGNC:117]
MTRNR2L3	0.94145	MT+RNR2 like 3 [Source:HGNC Symbol;Acc:HGNC:37157]
TRAF3IP2	0.941083	TRAF3 interacting protein 2 [Source:HGNC Symbol;Acc:HGNC:1343]
CDRT4	0.938735	CMT1A duplicated region transcript 4 [Source:HGNC Symbol;Acc:HGNC:14383]
TJP1	0.935888	tight junction protein 1 [Source:HGNC Symbol;Acc:HGNC:11827]
DDT	0.934347	D+dopachrome tautomerase [Source:HGNC Symbol;Acc:HGNC:2732]
DEFA4	0.934329	defensin alpha 4 [Source:HGNC Symbol;Acc:HGNC:2763]
ZBP1	0.932452	Z+DNA binding protein 1 [Source:HGNC Symbol;Acc:HGNC:16176]
CTRL	0.93119	chymotrypsin like [Source:HGNC Symbol;Acc:HGNC:2524]
TIFA	0.93004	TRAF interacting protein with forkhead associated domain [Source:HGNC Symbol;Acc:HGNC:19075]
PTK6	0.929566	protein tyrosine kinase 6 [Source:HGNC Symbol;Acc:HGNC:9617]
NUDT10	0.927637	nudix hydrolase 10 [Source:HGNC Symbol;Acc:HGNC:17621]
PSMB10	0.92736	proteasome 20S subunit beta 10 [Source:HGNC Symbol;Acc:HGNC:9538]
GNB1L	0.927045	G protein subunit beta 1 like [Source:HGNC Symbol;Acc:HGNC:4397]
ARL9	0.926957	ADP ribosylation factor like GTPase 9 [Source:HGNC Symbol;Acc:HGNC:23592]
KIFC2	0.923853	kinesin family member C2 [Source:HGNC Symbol;Acc:HGNC:29530]
ARID5B	0.923688	AT+rich interaction domain 5B [Source:HGNC Symbol;Acc:HGNC:17362]
PIEZO1	0.923228	piezo type mechanosensitive ion channel component 1 [Source:HGNC Symbol;Acc:HGNC:28993]
SMOC1	0.921703	SPARC related modular calcium binding 1 [Source:HGNC Symbol;Acc:HGNC:20318]
NDUFS3	0.918813	NADH:ubiquinone oxidoreductase core subunit S3 [Source:HGNC Symbol;Acc:HGNC:7710]
PSME2	0.917575	proteasome activator subunit 2 [Source:HGNC Symbol;Acc:HGNC:9569]
LMNB2	0.916363	lamin B2 [Source:HGNC Symbol;Acc:HGNC:6638]
LAMTOR2	0.916351	late endosomal/lysosomal adaptor, MAPK and MTOR activator 2 [Source:HGNC Symbol;Acc:HGNC:29796]
RANBP1	0.915515	RAN binding protein 1 [Source:HGNC Symbol;Acc:HGNC:9847]
MRPL54	0.915117	mitochondrial ribosomal protein L54 [Source:HGNC Symbol;Acc:HGNC:16685]
ZDHHC12	0.91345	zinc finger DHHC+type palmitoyltransferase 12 [Source:HGNC Symbol;Acc:HGNC:19159]
ANXA10	0.913003	annexin A10 [Source:HGNC Symbol;Acc:HGNC:534]
CMTR1	0.912626	cap methyltransferase 1 [Source:HGNC Symbol;Acc:HGNC:21077]
PAK4	0.912055	p21 (RAC1) activated kinase 4 [Source:HGNC Symbol;Acc:HGNC:16059]
TCTE1	0.911821	t+complex+associated+testis+expressed 1 [Source:HGNC Symbol;Acc:HGNC:11693]
PAFAH1B3	0.911821	platelet activating factor acetylhydrolase 1b catalytic subunit 3 [Source:HGNC Symbol;Acc:HGNC:8576]
CALCA	0.911391	calcitonin related polypeptide alpha [Source:HGNC Symbol;Acc:HGNC:1437]
PRR11	0.91039	proline rich 11 [Source:HGNC Symbol;Acc:HGNC:25619]
TKTL2	0.908439	transketolase like 2 [Source:HGNC Symbol;Acc:HGNC:25313]
SYNPO2	0.905267	synaptopodin 2 [Source:HGNC Symbol;Acc:HGNC:17732]
TROAP	0.903815	trophinin associated protein [Source:HGNC Symbol;Acc:HGNC:12327]
MAP6D1	0.903697	MAP6 domain containing 1 [Source:HGNC Symbol;Acc:HGNC:25753]
SLC6A9	0.903354	solute carrier family 6 member 9 [Source:HGNC Symbol;Acc:HGNC:11056]
FBN1	0.902901	fibrillin 1 [Source:HGNC Symbol;Acc:HGNC:3603]
CA7	0.902672	carbonic anhydrase 7 [Source:HGNC Symbol;Acc:HGNC:1381]
GBP5	0.900453	guanylate binding protein 5 [Source:HGNC Symbol;Acc:HGNC:19895]
E2F8	0.899199	E2F transcription factor 8 [Source:HGNC Symbol;Acc:HGNC:24727]
SPATS2L	0.898467	spermatogenesis associated serine rich 2 like [Source:HGNC Symbol;Acc:HGNC:24574]
CLEC2B	0.897611	C+type lectin domain family 2 member B [Source:HGNC Symbol;Acc:HGNC:2053]
CDCA4	0.896508	cell division cycle associated 4 [Source:HGNC Symbol;Acc:HGNC:14625]
FAM110B	0.895427	family with sequence similarity 110 member B [Source:HGNC Symbol;Acc:HGNC:28587]
SCRIB	0.894864	scribble planar cell polarity protein [Source:HGNC Symbol;Acc:HGNC:30377]
CAV2	0.894645	caveolin 2 [Source:HGNC Symbol;Acc:HGNC:1528]
HSPA6	0.894155	heat shock protein family A (Hsp70) member 6 [Source:HGNC Symbol;Acc:HGNC:5239]
ZNF581	0.893324	zinc finger protein 581 [Source:HGNC Symbol;Acc:HGNC:25017]
NTHL1	0.89218	nth like DNA glycosylase 1 [Source:HGNC Symbol;Acc:HGNC:8028]
IFI27L2	0.890774	interferon alpha inducible protein 27 like 2 [Source:HGNC Symbol;Acc:HGNC:19753]
ETV7	0.890632	ETS variant transcription factor 7 [Source:HGNC Symbol;Acc:HGNC:18160]
SMCO3	0.890502	single+pass membrane protein with coiled+coil domains 3 [Source:HGNC Symbol;Acc:HGNC:34401]
SLC4A2	0.889652	solute carrier family 4 member 2 [Source:HGNC Symbol;Acc:HGNC:11028]
SCARF1	0.889644	scavenger receptor class F member 1 [Source:HGNC Symbol;Acc:HGNC:16820]
ZNF653	0.889377	zinc finger protein 653 [Source:HGNC Symbol;Acc:HGNC:25196]
PRRG4	0.888763	proline rich and Gla domain 4 [Source:HGNC Symbol;Acc:HGNC:30799]
WDR18	0.888039	WD repeat domain 18 [Source:HGNC Symbol;Acc:HGNC:17956]
MAPK8IP1	0.887097	mitogen+activated protein kinase 8 interacting protein 1 [Source:HGNC Symbol;Acc:HGNC:6882]
GCKR	0.887026	glucokinase regulator [Source:HGNC Symbol;Acc:HGNC:4196]
CENPM	0.886975	centromere protein M [Source:HGNC Symbol;Acc:HGNC:18352]
SLC9A3R2	0.886854	SLC9A3 regulator 2 [Source:HGNC Symbol;Acc:HGNC:11076]
RSPH9	0.886288	radial spoke head component 9 [Source:HGNC Symbol;Acc:HGNC:21057]
TACR1	0.883937	tachykinin receptor 1 [Source:HGNC Symbol;Acc:HGNC:11526]
HERC6	0.883861	HECT and RLD domain containing E3 ubiquitin protein ligase family member 6 [Source:HGNC Symbol;Acc:HGNC:26072]
C8orf82	0.88363	chromosome 8 open reading frame 82 [Source:HGNC Symbol;Acc:HGNC:33826]
TBL3	0.882419	transducin beta like 3 [Source:HGNC Symbol;Acc:HGNC:11587]
NT5C3A	0.881954	5'+nucleotidase, cytosolic IIIA [Source:HGNC Symbol;Acc:HGNC:17820]
HMGN4	0.881541	high mobility group nucleosomal binding domain 4 [Source:HGNC Symbol;Acc:HGNC:4989]
DUSP5	0.881226	dual specificity phosphatase 5 [Source:HGNC Symbol;Acc:HGNC:3071]
CEACAM1	0.880641	CEA cell adhesion molecule 1 [Source:HGNC Symbol;Acc:HGNC:1814]
SERINC2	0.880237	serine incorporator 2 [Source:HGNC Symbol;Acc:HGNC:23231]
BCL2L14	0.879706	BCL2 like 14 [Source:HGNC Symbol;Acc:HGNC:16657]
ACTA2	0.879399	actin alpha 2, smooth muscle [Source:HGNC Symbol;Acc:HGNC:130]
NUDT8	0.878957	nudix hydrolase 8 [Source:HGNC Symbol;Acc:HGNC:8055]
SPATA21	0.878749	spermatogenesis associated 21 [Source:HGNC Symbol;Acc:HGNC:28026]
HMGA1	0.87849	high mobility group AT+hook 1 [Source:HGNC Symbol;Acc:HGNC:5010]
LYSMD2	0.876979	LysM domain containing 2 [Source:HGNC Symbol;Acc:HGNC:28571]
SDF4	0.876888	stromal cell derived factor 4 [Source:HGNC Symbol;Acc:HGNC:24188]
PUF60	0.875643	poly(U) binding splicing factor 60 [Source:HGNC Symbol;Acc:HGNC:17042]
RNF26	0.875118	ring finger protein 26 [Source:HGNC Symbol;Acc:HGNC:14646]
PDZK1IP1	0.875116	PDZK1 interacting protein 1 [Source:HGNC Symbol;Acc:HGNC:16887]
NUDT15	0.873426	nudix hydrolase 15 [Source:HGNC Symbol;Acc:HGNC:23063]
RNF213	0.873036	ring finger protein 213 [Source:HGNC Symbol;Acc:HGNC:14539]
APOL1	0.872969	apolipoprotein L1 [Source:HGNC Symbol;Acc:HGNC:618]
MPND	0.872915	MPN domain containing [Source:HGNC Symbol;Acc:HGNC:25934]
TMEM221	0.872166	transmembrane protein 221 [Source:HGNC Symbol;Acc:HGNC:21943]
CCHCR1	0.87172	coiled+coil alpha+helical rod protein 1 [Source:HGNC Symbol;Acc:HGNC:13930]
IFITM1	0.871321	interferon induced transmembrane protein 1 [Source:HGNC Symbol;Acc:HGNC:5412]
SLC25A33	0.870106	solute carrier family 25 member 33 [Source:HGNC Symbol;Acc:HGNC:29681]
PPP1R27	0.869383	protein phosphatase 1 regulatory subunit 27 [Source:HGNC Symbol;Acc:HGNC:16813]
SP140	0.868184	SP140 nuclear body protein [Source:HGNC Symbol;Acc:HGNC:17133]
CHST13	0.86776	carbohydrate sulfotransferase 13 [Source:HGNC Symbol;Acc:HGNC:21755]
VSIG10	0.867253	V+set and immunoglobulin domain containing 10 [Source:HGNC Symbol;Acc:HGNC:26078]
PCGF5	0.864737	polycomb group ring finger 5 [Source:HGNC Symbol;Acc:HGNC:28264]
TRAF3	0.864678	TNF receptor associated factor 3 [Source:HGNC Symbol;Acc:HGNC:12033]
SCD	0.864126	stearoyl+CoA desaturase [Source:HGNC Symbol;Acc:HGNC:10571]
PLA1A	0.862614	phospholipase A1 member A [Source:HGNC Symbol;Acc:HGNC:17661]
SPATA33	0.860855	spermatogenesis associated 33 [Source:HGNC Symbol;Acc:HGNC:26463]
GSTT1	0.860235	glutathione S+transferase theta 1 [Source:HGNC Symbol;Acc:HGNC:4641]
FAM3D	0.860147	FAM3 metabolism regulating signaling molecule D [Source:HGNC Symbol;Acc:HGNC:18665]
FAM3A	0.860038	FAM3 metabolism regulating signaling molecule A [Source:HGNC Symbol;Acc:HGNC:13749]
TMEM219	0.859404	transmembrane protein 219 [Source:HGNC Symbol;Acc:HGNC:25201]
WSB2	0.859002	WD repeat and SOCS box containing 2 [Source:HGNC Symbol;Acc:HGNC:19222]
PIM1	0.858196	Pim+1 proto+oncogene, serine/threonine kinase [Source:HGNC Symbol;Acc:HGNC:8986]
OR9A4	0.857796	olfactory receptor family 9 subfamily A member 4 [Source:HGNC Symbol;Acc:HGNC:15095]
APRT	0.857132	adenine phosphoribosyltransferase [Source:HGNC Symbol;Acc:HGNC:626]
DHX58	0.856943	DExH+box helicase 58 [Source:HGNC Symbol;Acc:HGNC:29517]
EIF1AY	0.856821	eukaryotic translation initiation factor 1A Y+linked [Source:HGNC Symbol;Acc:HGNC:3252]
MPO	0.855574	myeloperoxidase [Source:HGNC Symbol;Acc:HGNC:7218]
E2F2	0.85468	E2F transcription factor 2 [Source:HGNC Symbol;Acc:HGNC:3114]
RPS28	0.853291	ribosomal protein S28 [Source:HGNC Symbol;Acc:HGNC:10418]
PDCL	0.852547	phosducin like [Source:HGNC Symbol;Acc:HGNC:8770]
NUDT1	0.85231	nudix hydrolase 1 [Source:HGNC Symbol;Acc:HGNC:8048]
ANKRD37	0.85225	ankyrin repeat domain 37 [Source:HGNC Symbol;Acc:HGNC:29593]
KRTAP5+9	0.851865	keratin associated protein 5+9 [Source:HGNC Symbol;Acc:HGNC:23604]
POP7	0.85117	POP7 homolog, ribonuclease P/MRP subunit [Source:HGNC Symbol;Acc:HGNC:19949]
MMP11	0.8499	matrix metallopeptidase 11 [Source:HGNC Symbol;Acc:HGNC:7157]
RPS4Y1	0.848826	ribosomal protein S4 Y+linked 1 [Source:HGNC Symbol;Acc:HGNC:10425]
CYSLTR1	0.848594	cysteinyl leukotriene receptor 1 [Source:HGNC Symbol;Acc:HGNC:17451]
HBE1	0.848278	hemoglobin subunit epsilon 1 [Source:HGNC Symbol;Acc:HGNC:4830]
GPI	0.847938	glucose+6+phosphate isomerase [Source:HGNC Symbol;Acc:HGNC:4458]
MRPL38	0.846974	mitochondrial ribosomal protein L38 [Source:HGNC Symbol;Acc:HGNC:14033]
DCXR	0.84697	dicarbonyl and L+xylulose reductase [Source:HGNC Symbol;Acc:HGNC:18985]
XAF1	0.845972	XIAP associated factor 1 [Source:HGNC Symbol;Acc:HGNC:30932]
MFSD12	0.84569	major facilitator superfamily domain containing 12 [Source:HGNC Symbol;Acc:HGNC:28299]
ABCD1	0.844309	ATP binding cassette subfamily D member 1 [Source:HGNC Symbol;Acc:HGNC:61]
IFI44	0.843843	interferon induced protein 44 [Source:HGNC Symbol;Acc:HGNC:16938]
RANGAP1	0.843302	Ran GTPase activating protein 1 [Source:HGNC Symbol;Acc:HGNC:9854]
GTF2F1	0.842866	general transcription factor IIF subunit 1 [Source:HGNC Symbol;Acc:HGNC:4652]
RYR1	0.842495	ryanodine receptor 1 [Source:HGNC Symbol;Acc:HGNC:10483]
POLB	0.842082	DNA polymerase beta [Source:HGNC Symbol;Acc:HGNC:9174]
EPS8L2	0.841934	EPS8 like 2 [Source:HGNC Symbol;Acc:HGNC:21296]
RND2	0.840954	Rho family GTPase 2 [Source:HGNC Symbol;Acc:HGNC:18315]
MLST8	0.839651	MTOR associated protein, LST8 homolog [Source:HGNC Symbol;Acc:HGNC:24825]
SLC12A8	0.839312	solute carrier family 12 member 8 [Source:HGNC Symbol;Acc:HGNC:15595]
GSDMC	0.838282	gasdermin C [Source:HGNC Symbol;Acc:HGNC:7151]
COX6A1	0.837081	cytochrome c oxidase subunit 6A1 [Source:HGNC Symbol;Acc:HGNC:2277]
NRN1	0.836867	neuritin 1 [Source:HGNC Symbol;Acc:HGNC:17972]
FSCN1	0.834615	fascin actin+bundling protein 1 [Source:HGNC Symbol;Acc:HGNC:11148]
KIAA1549	0.834054	KIAA1549 [Source:HGNC Symbol;Acc:HGNC:22219]
APOL6	0.833678	apolipoprotein L6 [Source:HGNC Symbol;Acc:HGNC:14870]
NCAM2	0.833503	neural cell adhesion molecule 2 [Source:HGNC Symbol;Acc:HGNC:7657]
SSBP4	0.833403	single stranded DNA binding protein 4 [Source:HGNC Symbol;Acc:HGNC:15676]
WDR62	0.833111	WD repeat domain 62 [Source:HGNC Symbol;Acc:HGNC:24502]
SQSTM1	0.832599	sequestosome 1 [Source:HGNC Symbol;Acc:HGNC:11280]
IFIT3	0.830986	interferon induced protein with tetratricopeptide repeats 3 [Source:HGNC Symbol;Acc:HGNC:5411]
RPL35	0.830966	ribosomal protein L35 [Source:HGNC Symbol;Acc:HGNC:10344]
RHOC	0.829928	ras homolog family member C [Source:HGNC Symbol;Acc:HGNC:669]
ETFB	0.829859	electron transfer flavoprotein subunit beta [Source:HGNC Symbol;Acc:HGNC:3482]
CCDC78	0.829433	coiled+coil domain containing 78 [Source:HGNC Symbol;Acc:HGNC:14153]
ZXDB	0.82921	zinc finger X+linked duplicated B [Source:HGNC Symbol;Acc:HGNC:13199]
RAB25	0.829064	RAB25, member RAS oncogene family [Source:HGNC Symbol;Acc:HGNC:18238]
CH25H	0.828213	cholesterol 25+hydroxylase [Source:HGNC Symbol;Acc:HGNC:1907]
RNASEH2A	0.827916	ribonuclease H2 subunit A [Source:HGNC Symbol;Acc:HGNC:18518]
PLSCR1	0.827913	phospholipid scramblase 1 [Source:HGNC Symbol;Acc:HGNC:9092]
BIK	0.827412	BCL2 interacting killer [Source:HGNC Symbol;Acc:HGNC:1051]
REXO5	0.826171	RNA exonuclease 5 [Source:HGNC Symbol;Acc:HGNC:24661]
APOL5	0.826157	apolipoprotein L5 [Source:HGNC Symbol;Acc:HGNC:14869]
KLHL11	0.82602	kelch like family member 11 [Source:HGNC Symbol;Acc:HGNC:19008]
IGFBP2	0.825428	insulin like growth factor binding protein 2 [Source:HGNC Symbol;Acc:HGNC:5471]
OVCA2	0.825296	OVCA2 serine hydrolase domain containing [Source:HGNC Symbol;Acc:HGNC:24203]
PEPD	0.824853	peptidase D [Source:HGNC Symbol;Acc:HGNC:8840]
HDHD3	0.824677	haloacid dehalogenase like hydrolase domain containing 3 [Source:HGNC Symbol;Acc:HGNC:28171]
CHID1	0.824198	chitinase domain containing 1 [Source:HGNC Symbol;Acc:HGNC:28474]
CCM2	0.824033	CCM2 scaffold protein [Source:HGNC Symbol;Acc:HGNC:21708]
C18orf21	0.82392	chromosome 18 open reading frame 21 [Source:HGNC Symbol;Acc:HGNC:28802]
C19orf53	0.821591	chromosome 19 open reading frame 53 [Source:HGNC Symbol;Acc:HGNC:24991]
RGMA	0.821163	repulsive guidance molecule BMP co+receptor a [Source:HGNC Symbol;Acc:HGNC:30308]
BNIP1	0.820982	BCL2 interacting protein 1 [Source:HGNC Symbol;Acc:HGNC:1082]
TMSB4Y	0.820631	thymosin beta 4 Y+linked [Source:HGNC Symbol;Acc:HGNC:11882]
PARP14	0.820448	poly(ADP+ribose) polymerase family member 14 [Source:HGNC Symbol;Acc:HGNC:29232]
PHF11	0.820242	PHD finger protein 11 [Source:HGNC Symbol;Acc:HGNC:17024]
VTN	0.819819	vitronectin [Source:HGNC Symbol;Acc:HGNC:12724]
SSNA1	0.818179	SS nuclear autoantigen 1 [Source:HGNC Symbol;Acc:HGNC:11321]
RHBG	0.817783	Rh family B glycoprotein [Source:HGNC Symbol;Acc:HGNC:14572]
LPO	0.816878	lactoperoxidase [Source:HGNC Symbol;Acc:HGNC:6678]
DDX3Y	0.816509	DEAD+box helicase 3 Y+linked [Source:HGNC Symbol;Acc:HGNC:2699]
CASZ1	0.816283	castor zinc finger 1 [Source:HGNC Symbol;Acc:HGNC:26002]
RPS15	0.814921	ribosomal protein S15 [Source:HGNC Symbol;Acc:HGNC:10388]
STOML1	0.814751	stomatin like 1 [Source:HGNC Symbol;Acc:HGNC:14560]
NPC2	0.814165	NPC intracellular cholesterol transporter 2 [Source:HGNC Symbol;Acc:HGNC:14537]
EID3	0.813911	EP300 interacting inhibitor of differentiation 3 [Source:HGNC Symbol;Acc:HGNC:32961]
LRRC56	0.813874	leucine rich repeat containing 56 [Source:HGNC Symbol;Acc:HGNC:25430]
ZDHHC8	0.813372	zinc finger DHHC+type palmitoyltransferase 8 [Source:HGNC Symbol;Acc:HGNC:18474]
PTGER4	0.813001	prostaglandin E receptor 4 [Source:HGNC Symbol;Acc:HGNC:9596]
KIF20A	0.812567	kinesin family member 20A [Source:HGNC Symbol;Acc:HGNC:9787]
RHEBL1	0.811199	RHEB like 1 [Source:HGNC Symbol;Acc:HGNC:21166]
CRYBB1	0.811003	crystallin beta B1 [Source:HGNC Symbol;Acc:HGNC:2397]
C7orf50	0.810217	chromosome 7 open reading frame 50 [Source:HGNC Symbol;Acc:HGNC:22421]
GYPC	0.810043	glycophorin C (Gerbich blood group) [Source:HGNC Symbol;Acc:HGNC:4704]
CYP2J2	0.809335	cytochrome P450 family 2 subfamily J member 2 [Source:HGNC Symbol;Acc:HGNC:2634]
DYNC2I2	0.809014	dynein 2 intermediate chain 2 [Source:HGNC Symbol;Acc:HGNC:28296]
OR6N1	0.807965	olfactory receptor family 6 subfamily N member 1 [Source:HGNC Symbol;Acc:HGNC:15034]
GBP1	0.807714	guanylate binding protein 1 [Source:HGNC Symbol;Acc:HGNC:4182]
THNSL2	0.807606	threonine synthase like 2 [Source:HGNC Symbol;Acc:HGNC:25602]
UBA7	0.807077	ubiquitin like modifier activating enzyme 7 [Source:HGNC Symbol;Acc:HGNC:12471]
HEBP1	0.806979	heme binding protein 1 [Source:HGNC Symbol;Acc:HGNC:17176]
RNF31	0.80686	ring finger protein 31 [Source:HGNC Symbol;Acc:HGNC:16031]
USP9Y	0.806632	ubiquitin specific peptidase 9 Y+linked [Source:HGNC Symbol;Acc:HGNC:12633]
UTY	0.806532	ubiquitously transcribed tetratricopeptide repeat containing, Y+linked [Source:HGNC Symbol;Acc:HGNC:12638]
ATXN7L2	0.805857	ataxin 7 like 2 [Source:HGNC Symbol;Acc:HGNC:28713]
MRPL4	0.805802	mitochondrial ribosomal protein L4 [Source:HGNC Symbol;Acc:HGNC:14276]
AIRE	0.805324	autoimmune regulator [Source:HGNC Symbol;Acc:HGNC:360]
SLC18A1	0.804023	solute carrier family 18 member A1 [Source:HGNC Symbol;Acc:HGNC:10934]
CDCA5	0.803389	cell division cycle associated 5 [Source:HGNC Symbol;Acc:HGNC:14626]
IDO1	0.802859	indoleamine 2,3+dioxygenase 1 [Source:HGNC Symbol;Acc:HGNC:6059]
LENG9	0.802374	leukocyte receptor cluster member 9 [Source:HGNC Symbol;Acc:HGNC:16306]
WRAP53	0.802153	WD repeat containing antisense to TP53 [Source:HGNC Symbol;Acc:HGNC:25522]
RGPD1	0.801809	RANBP2 like and GRIP domain containing 1 [Source:HGNC Symbol;Acc:HGNC:32414]
FGFR4	0.801598	fibroblast growth factor receptor 4 [Source:HGNC Symbol;Acc:HGNC:3691]
EZH2	0.799914	enhancer of zeste 2 polycomb repressive complex 2 subunit [Source:HGNC Symbol;Acc:HGNC:3527]
TOMM40	0.799741	translocase of outer mitochondrial membrane 40 [Source:HGNC Symbol;Acc:HGNC:18001]
DRAP1	0.799088	DR1 associated protein 1 [Source:HGNC Symbol;Acc:HGNC:3019]
ILVBL	0.798999	ilvB acetolactate synthase like [Source:HGNC Symbol;Acc:HGNC:6041]
OR1Q1	0.798645	olfactory receptor family 1 subfamily Q member 1 [Source:HGNC Symbol;Acc:HGNC:8223]
SEC14L3	0.798645	SEC14 like lipid binding 3 [Source:HGNC Symbol;Acc:HGNC:18655]
WDR24	0.798553	WD repeat domain 24 [Source:HGNC Symbol;Acc:HGNC:20852]
MCPH1	0.795772	microcephalin 1 [Source:HGNC Symbol;Acc:HGNC:6954]
NLGN4Y	0.795625	neuroligin 4 Y+linked [Source:HGNC Symbol;Acc:HGNC:15529]
PIFO	0.795452	primary cilia formation [Source:HGNC Symbol;Acc:HGNC:27009]
SECTM1	0.795203	secreted and transmembrane 1 [Source:HGNC Symbol;Acc:HGNC:10707]
LGALS9B	0.794693	galectin 9B [Source:HGNC Symbol;Acc:HGNC:24842]
BMI1	0.79432	BMI1 proto+oncogene, polycomb ring finger [Source:HGNC Symbol;Acc:HGNC:1066]
KRT1	0.794123	keratin 1 [Source:HGNC Symbol;Acc:HGNC:6412]
DBF4	0.793858	DBF4 zinc finger [Source:HGNC Symbol;Acc:HGNC:17364]
OAS2	0.790691	2'+5'+oligoadenylate synthetase 2 [Source:HGNC Symbol;Acc:HGNC:8087]
ERG	0.79027	ETS transcription factor ERG [Source:HGNC Symbol;Acc:HGNC:3446]
GCDH	0.789296	glutaryl+CoA dehydrogenase [Source:HGNC Symbol;Acc:HGNC:4189]
B3GNT4	0.788579	UDP+GlcNAc:betaGal beta+1,3+N+acetylglucosaminyltransferase 4 [Source:HGNC Symbol;Acc:HGNC:15683]
C3orf38	0.788327	chromosome 3 open reading frame 38 [Source:HGNC Symbol;Acc:HGNC:28384]
EPPK1	0.788069	epiplakin 1 [Source:HGNC Symbol;Acc:HGNC:15577]
ZFAND4	0.78799	zinc finger AN1+type containing 4 [Source:HGNC Symbol;Acc:HGNC:23504]
FFAR3	0.787322	free fatty acid receptor 3 [Source:HGNC Symbol;Acc:HGNC:4499]
TMEM54	0.787109	transmembrane protein 54 [Source:HGNC Symbol;Acc:HGNC:24143]
DDX60	0.785696	DExD/H+box helicase 60 [Source:HGNC Symbol;Acc:HGNC:25942]
WARS1	0.785664	tryptophanyl+tRNA synthetase 1 [Source:HGNC Symbol;Acc:HGNC:12729]
CEACAM6	0.785476	CEA cell adhesion molecule 6 [Source:HGNC Symbol;Acc:HGNC:1818]
MMP15	0.784983	matrix metallopeptidase 15 [Source:HGNC Symbol;Acc:HGNC:7161]
PRTN3	0.784125	proteinase 3 [Source:HGNC Symbol;Acc:HGNC:9495]
RPLP1	0.783834	ribosomal protein lateral stalk subunit P1 [Source:HGNC Symbol;Acc:HGNC:10372]
RAB42	0.783693	RAB42, member RAS oncogene family [Source:HGNC Symbol;Acc:HGNC:28702]
TOE1	0.783024	target of EGR1, exonuclease [Source:HGNC Symbol;Acc:HGNC:15954]
RHBDF2	0.782854	rhomboid 5 homolog 2 [Source:HGNC Symbol;Acc:HGNC:20788]
LSM10	0.782599	LSM10, U7 small nuclear RNA associated [Source:HGNC Symbol;Acc:HGNC:17562]
LYG2	0.781764	lysozyme g2 [Source:HGNC Symbol;Acc:HGNC:29615]
ZBTB42	0.780762	zinc finger and BTB domain containing 42 [Source:HGNC Symbol;Acc:HGNC:32550]
ECI1	0.779468	enoyl+CoA delta isomerase 1 [Source:HGNC Symbol;Acc:HGNC:2703]
FOXJ1	0.77937	forkhead box J1 [Source:HGNC Symbol;Acc:HGNC:3816]
SFT2D2	0.77881	SFT2 domain containing 2 [Source:HGNC Symbol;Acc:HGNC:25140]
RPL8	0.777225	ribosomal protein L8 [Source:HGNC Symbol;Acc:HGNC:10368]
CARM1	0.77713	coactivator associated arginine methyltransferase 1 [Source:HGNC Symbol;Acc:HGNC:23393]
DDX54	0.776561	DEAD+box helicase 54 [Source:HGNC Symbol;Acc:HGNC:20084]
NUDT18	0.776115	nudix hydrolase 18 [Source:HGNC Symbol;Acc:HGNC:26194]
YDJC	0.776051	YdjC chitooligosaccharide deacetylase homolog [Source:HGNC Symbol;Acc:HGNC:27158]
WDR83	0.775864	WD repeat domain 83 [Source:HGNC Symbol;Acc:HGNC:32672]
ADRM1	0.775844	adhesion regulating molecule 1 [Source:HGNC Symbol;Acc:HGNC:15759]
FUT4	0.775686	fucosyltransferase 4 [Source:HGNC Symbol;Acc:HGNC:4015]
IFIT1	0.775302	interferon induced protein with tetratricopeptide repeats 1 [Source:HGNC Symbol;Acc:HGNC:5407]
FICD	0.774795	FIC domain protein adenylyltransferase [Source:HGNC Symbol;Acc:HGNC:18416]
SNRNP25	0.774424	small nuclear ribonucleoprotein U11/U12 subunit 25 [Source:HGNC Symbol;Acc:HGNC:14161]
C9orf16	0.773841	chromosome 9 open reading frame 16 [Source:HGNC Symbol;Acc:HGNC:17823]
PDXK	0.773615	pyridoxal kinase [Source:HGNC Symbol;Acc:HGNC:8819]
FBXO39	0.77352	F+box protein 39 [Source:HGNC Symbol;Acc:HGNC:28565]
CISD3	0.773448	CDGSH iron sulfur domain 3 [Source:HGNC Symbol;Acc:HGNC:27578]
C19orf25	0.772594	chromosome 19 open reading frame 25 [Source:HGNC Symbol;Acc:HGNC:26711]
PLEKHS1	0.772347	pleckstrin homology domain containing S1 [Source:HGNC Symbol;Acc:HGNC:26285]
LRRC8E	0.772174	leucine rich repeat containing 8 VRAC subunit E [Source:HGNC Symbol;Acc:HGNC:26272]
SMCO1	0.771764	single+pass membrane protein with coiled+coil domains 1 [Source:HGNC Symbol;Acc:HGNC:27407]
ACTR3C	0.77117	actin related protein 3C [Source:HGNC Symbol;Acc:HGNC:37282]
FOXD4	0.770873	forkhead box D4 [Source:HGNC Symbol;Acc:HGNC:3805]
TOMM5	0.770626	translocase of outer mitochondrial membrane 5 [Source:HGNC Symbol;Acc:HGNC:31369]
CTIF	0.770259	cap binding complex dependent translation initiation factor [Source:HGNC Symbol;Acc:HGNC:23925]
PKD1	0.769765	polycystin 1, transient receptor potential channel interacting [Source:HGNC Symbol;Acc:HGNC:9008]
RAD51AP1	0.769316	RAD51 associated protein 1 [Source:HGNC Symbol;Acc:HGNC:16956]
EIF4EBP1	0.768845	eukaryotic translation initiation factor 4E binding protein 1 [Source:HGNC Symbol;Acc:HGNC:3288]
ZFY	0.767411	zinc finger protein Y+linked [Source:HGNC Symbol;Acc:HGNC:12870]
DUSP12	0.76683	dual specificity phosphatase 12 [Source:HGNC Symbol;Acc:HGNC:3067]
FBXO2	0.766494	F+box protein 2 [Source:HGNC Symbol;Acc:HGNC:13581]
POLR2I	0.766154	RNA polymerase II subunit I [Source:HGNC Symbol;Acc:HGNC:9196]
CUBN	0.766008	cubilin [Source:HGNC Symbol;Acc:HGNC:2548]
DTNBP1	0.76597	dystrobrevin binding protein 1 [Source:HGNC Symbol;Acc:HGNC:17328]
XIRP1	0.765602	xin actin binding repeat containing 1 [Source:HGNC Symbol;Acc:HGNC:14301]
SHARPIN	0.76528	SHANK associated RH domain interactor [Source:HGNC Symbol;Acc:HGNC:25321]
GTF3C5	0.765184	general transcription factor IIIC subunit 5 [Source:HGNC Symbol;Acc:HGNC:4668]
STAT2	0.764801	signal transducer and activator of transcription 2 [Source:HGNC Symbol;Acc:HGNC:11363]
GALM	0.764623	galactose mutarotase [Source:HGNC Symbol;Acc:HGNC:24063]
TMEM151B	0.76451	transmembrane protein 151B [Source:HGNC Symbol;Acc:HGNC:21315]
C15orf39	0.762949	chromosome 15 open reading frame 39 [Source:HGNC Symbol;Acc:HGNC:24497]
CCR3	0.762601	C+C motif chemokine receptor 3 [Source:HGNC Symbol;Acc:HGNC:1604]
HMGA2	0.762282	high mobility group AT+hook 2 [Source:HGNC Symbol;Acc:HGNC:5009]
GFER	0.761978	growth factor, augmenter of liver regeneration [Source:HGNC Symbol;Acc:HGNC:4236]
NUTM2B	0.761233	NUT family member 2B [Source:HGNC Symbol;Acc:HGNC:23445]
WNK3	0.759774	WNK lysine deficient protein kinase 3 [Source:HGNC Symbol;Acc:HGNC:14543]
RPS4Y2	0.759438	ribosomal protein S4 Y+linked 2 [Source:HGNC Symbol;Acc:HGNC:18501]
SH3GLB2	0.759433	SH3 domain containing GRB2 like, endophilin B2 [Source:HGNC Symbol;Acc:HGNC:10834]
CCDC97	0.758919	coiled+coil domain containing 97 [Source:HGNC Symbol;Acc:HGNC:28289]
CGREF1	0.758822	cell growth regulator with EF+hand domain 1 [Source:HGNC Symbol;Acc:HGNC:16962]
ACADS	0.757951	acyl+CoA dehydrogenase short chain [Source:HGNC Symbol;Acc:HGNC:90]
TAPBPL	0.756784	TAP binding protein like [Source:HGNC Symbol;Acc:HGNC:30683]
RPL18A	0.756169	ribosomal protein L18a [Source:HGNC Symbol;Acc:HGNC:10311]
DDX49	0.755957	DEAD+box helicase 49 [Source:HGNC Symbol;Acc:HGNC:18684]
HMSD	0.755951	histocompatibility minor serpin domain containing [Source:HGNC Symbol;Acc:HGNC:23037]
NDUFA11	0.755921	NADH:ubiquinone oxidoreductase subunit A11 [Source:HGNC Symbol;Acc:HGNC:20371]
TAF5	0.754367	TATA+box binding protein associated factor 5 [Source:HGNC Symbol;Acc:HGNC:11539]
IQGAP3	0.754232	IQ motif containing GTPase activating protein 3 [Source:HGNC Symbol;Acc:HGNC:20669]
GAS8	0.754127	growth arrest specific 8 [Source:HGNC Symbol;Acc:HGNC:4166]
NDUFS6	0.753936	NADH:ubiquinone oxidoreductase subunit S6 [Source:HGNC Symbol;Acc:HGNC:7713]
FANCA	0.753749	FA complementation group A [Source:HGNC Symbol;Acc:HGNC:3582]
AURKAIP1	0.753673	aurora kinase A interacting protein 1 [Source:HGNC Symbol;Acc:HGNC:24114]
TCF7L2	0.752848	transcription factor 7 like 2 [Source:HGNC Symbol;Acc:HGNC:11641]
MFSD5	0.752784	major facilitator superfamily domain containing 5 [Source:HGNC Symbol;Acc:HGNC:28156]
JUP	0.751918	junction plakoglobin [Source:HGNC Symbol;Acc:HGNC:6207]
KDM5D	0.751018	lysine demethylase 5D [Source:HGNC Symbol;Acc:HGNC:11115]
RPP25L	0.748394	ribonuclease P/MRP subunit p25 like [Source:HGNC Symbol;Acc:HGNC:19909]
ERG28	0.74826	ergosterol biosynthesis 28 homolog [Source:HGNC Symbol;Acc:HGNC:1187]
TAP1	0.748159	transporter 1, ATP binding cassette subfamily B member [Source:HGNC Symbol;Acc:HGNC:43]
LIPM	0.748053	lipase family member M [Source:HGNC Symbol;Acc:HGNC:23455]
LPIN2	0.747863	lipin 2 [Source:HGNC Symbol;Acc:HGNC:14450]
TDRD7	0.747649	tudor domain containing 7 [Source:HGNC Symbol;Acc:HGNC:30831]
ATF3	0.747232	activating transcription factor 3 [Source:HGNC Symbol;Acc:HGNC:785]
FEM1A	0.747088	fem+1 homolog A [Source:HGNC Symbol;Acc:HGNC:16934]
IL4I1	0.746772	interleukin 4 induced 1 [Source:HGNC Symbol;Acc:HGNC:19094]
SDSL	0.746493	serine dehydratase like [Source:HGNC Symbol;Acc:HGNC:30404]
POLR1C	0.746377	RNA polymerase I and III subunit C [Source:HGNC Symbol;Acc:HGNC:20194]
DNTT	0.746286	DNA nucleotidylexotransferase [Source:HGNC Symbol;Acc:HGNC:2983]
PARP11	0.746128	poly(ADP+ribose) polymerase family member 11 [Source:HGNC Symbol;Acc:HGNC:1186]
PCNA	0.746031	proliferating cell nuclear antigen [Source:HGNC Symbol;Acc:HGNC:8729]
GRIA3	0.745523	glutamate ionotropic receptor AMPA type subunit 3 [Source:HGNC Symbol;Acc:HGNC:4573]
PVALB	0.7452	parvalbumin [Source:HGNC Symbol;Acc:HGNC:9704]
CCDC137	0.744948	coiled+coil domain containing 137 [Source:HGNC Symbol;Acc:HGNC:33451]
IL15	0.744931	interleukin 15 [Source:HGNC Symbol;Acc:HGNC:5977]
ENPEP	0.744786	glutamyl aminopeptidase [Source:HGNC Symbol;Acc:HGNC:3355]
PGPEP1L	0.744415	pyroglutamyl+peptidase I like [Source:HGNC Symbol;Acc:HGNC:27080]
RAB20	0.744064	RAB20, member RAS oncogene family [Source:HGNC Symbol;Acc:HGNC:18260]
TRAPPC5	0.743779	trafficking protein particle complex 5 [Source:HGNC Symbol;Acc:HGNC:23067]
PIGT	0.742992	phosphatidylinositol glycan anchor biosynthesis class T [Source:HGNC Symbol;Acc:HGNC:14938]
DRICH1	0.740904	aspartate rich 1 [Source:HGNC Symbol;Acc:HGNC:28031]
RFC5	0.740799	replication factor C subunit 5 [Source:HGNC Symbol;Acc:HGNC:9973]
CDC45	0.740087	cell division cycle 45 [Source:HGNC Symbol;Acc:HGNC:1739]
BOP1	0.739576	BOP1 ribosomal biogenesis factor [Source:HGNC Symbol;Acc:HGNC:15519]
IFI44L	0.739358	interferon induced protein 44 like [Source:HGNC Symbol;Acc:HGNC:17817]
ZNF200	0.739239	zinc finger protein 200 [Source:HGNC Symbol;Acc:HGNC:12993]
PRKAG2	0.738853	protein kinase AMP+activated non+catalytic subunit gamma 2 [Source:HGNC Symbol;Acc:HGNC:9386]
EMID1	0.738131	EMI domain containing 1 [Source:HGNC Symbol;Acc:HGNC:18036]
MED27	0.738052	mediator complex subunit 27 [Source:HGNC Symbol;Acc:HGNC:2377]
IMP4	0.738018	IMP U3 small nucleolar ribonucleoprotein 4 [Source:HGNC Symbol;Acc:HGNC:30856]
ANLN	0.737829	anillin actin binding protein [Source:HGNC Symbol;Acc:HGNC:14082]
FABP4	0.737797	fatty acid binding protein 4 [Source:HGNC Symbol;Acc:HGNC:3559]
PCP2	0.737604	Purkinje cell protein 2 [Source:HGNC Symbol;Acc:HGNC:30209]
TRIM11	0.737592	tripartite motif containing 11 [Source:HGNC Symbol;Acc:HGNC:16281]
RILP	0.73731	Rab interacting lysosomal protein [Source:HGNC Symbol;Acc:HGNC:30266]
PIMREG	0.737292	PICALM interacting mitotic regulator [Source:HGNC Symbol;Acc:HGNC:25483]
MROH1	0.736421	maestro heat like repeat family member 1 [Source:HGNC Symbol;Acc:HGNC:26958]
EPB41L5	0.735932	erythrocyte membrane protein band 4.1 like 5 [Source:HGNC Symbol;Acc:HGNC:19819]
HELZ2	0.735466	helicase with zinc finger 2 [Source:HGNC Symbol;Acc:HGNC:30021]
FRMD5	0.735172	FERM domain containing 5 [Source:HGNC Symbol;Acc:HGNC:28214]
TRANK1	0.734958	tetratricopeptide repeat and ankyrin repeat containing 1 [Source:HGNC Symbol;Acc:HGNC:29011]
LAMB2	0.734521	laminin subunit beta 2 [Source:HGNC Symbol;Acc:HGNC:6487]
SEBOX	0.734415	SEBOX homeobox [Source:HGNC Symbol;Acc:HGNC:32942]
RETN	0.733925	resistin [Source:HGNC Symbol;Acc:HGNC:20389]
CASP1	0.732877	caspase 1 [Source:HGNC Symbol;Acc:HGNC:1499]
TIMM50	0.732827	translocase of inner mitochondrial membrane 50 [Source:HGNC Symbol;Acc:HGNC:23656]
LAP3	0.732031	leucine aminopeptidase 3 [Source:HGNC Symbol;Acc:HGNC:18449]
ERP29	0.731828	endoplasmic reticulum protein 29 [Source:HGNC Symbol;Acc:HGNC:13799]
C20orf27	0.72979	chromosome 20 open reading frame 27 [Source:HGNC Symbol;Acc:HGNC:15873]
FAM122C	0.729621	family with sequence similarity 122C [Source:HGNC Symbol;Acc:HGNC:25202]
IFIT2	0.729064	interferon induced protein with tetratricopeptide repeats 2 [Source:HGNC Symbol;Acc:HGNC:5409]
CYC1	0.728917	cytochrome c1 [Source:HGNC Symbol;Acc:HGNC:2579]
SH3RF1	0.728687	SH3 domain containing ring finger 1 [Source:HGNC Symbol;Acc:HGNC:17650]
FBXW5	0.728295	F+box and WD repeat domain containing 5 [Source:HGNC Symbol;Acc:HGNC:13613]
CRIP1	0.728052	cysteine rich protein 1 [Source:HGNC Symbol;Acc:HGNC:2360]
OAS1	0.727943	2'+5'+oligoadenylate synthetase 1 [Source:HGNC Symbol;Acc:HGNC:8086]
ANXA2R	0.727903	annexin A2 receptor [Source:HGNC Symbol;Acc:HGNC:33463]
KLF11	0.727382	Kruppel like factor 11 [Source:HGNC Symbol;Acc:HGNC:11811]
DEK	0.726935	DEK proto+oncogene [Source:HGNC Symbol;Acc:HGNC:2768]
NOL12	0.726393	nucleolar protein 12 [Source:HGNC Symbol;Acc:HGNC:28585]
DUSP4	0.726189	dual specificity phosphatase 4 [Source:HGNC Symbol;Acc:HGNC:3070]
NUDC	0.725835	nuclear distribution C, dynein complex regulator [Source:HGNC Symbol;Acc:HGNC:8045]
IFI30	0.72563	IFI30 lysosomal thiol reductase [Source:HGNC Symbol;Acc:HGNC:5398]
MICA	0.72558	MHC class I polypeptide+related sequence A [Source:HGNC Symbol;Acc:HGNC:7090]
SKOR1	0.725492	SKI family transcriptional corepressor 1 [Source:HGNC Symbol;Acc:HGNC:21326]
STAP2	0.723953	signal transducing adaptor family member 2 [Source:HGNC Symbol;Acc:HGNC:30430]
SLC16A4	0.72252	solute carrier family 16 member 4 [Source:HGNC Symbol;Acc:HGNC:10925]
ARMC6	0.722277	armadillo repeat containing 6 [Source:HGNC Symbol;Acc:HGNC:25049]
FAM207A	0.722162	family with sequence similarity 207 member A [Source:HGNC Symbol;Acc:HGNC:15811]
FAM118A	0.722016	family with sequence similarity 118 member A [Source:HGNC Symbol;Acc:HGNC:1313]
SETD1A	0.722013	SET domain containing 1A, histone lysine methyltransferase [Source:HGNC Symbol;Acc:HGNC:29010]
CCL27	0.720307	C+C motif chemokine ligand 27 [Source:HGNC Symbol;Acc:HGNC:10626]
SLC3A2	0.719669	solute carrier family 3 member 2 [Source:HGNC Symbol;Acc:HGNC:11026]
SREBF2	0.719612	sterol regulatory element binding transcription factor 2 [Source:HGNC Symbol;Acc:HGNC:11290]
TCEA2	0.71849	transcription elongation factor A2 [Source:HGNC Symbol;Acc:HGNC:11614]
EFHD1	0.718409	EF+hand domain family member D1 [Source:HGNC Symbol;Acc:HGNC:29556]
KHK	0.718334	ketohexokinase [Source:HGNC Symbol;Acc:HGNC:6315]
SF3A2	0.717792	splicing factor 3a subunit 2 [Source:HGNC Symbol;Acc:HGNC:10766]
MFAP5	0.717689	microfibril associated protein 5 [Source:HGNC Symbol;Acc:HGNC:29673]
HAGHL	0.717379	hydroxyacylglutathione hydrolase like [Source:HGNC Symbol;Acc:HGNC:14177]
BIRC5	0.717069	baculoviral IAP repeat containing 5 [Source:HGNC Symbol;Acc:HGNC:593]
PDCD1LG2	0.717032	programmed cell death 1 ligand 2 [Source:HGNC Symbol;Acc:HGNC:18731]
NXT1	0.717018	nuclear transport factor 2 like export factor 1 [Source:HGNC Symbol;Acc:HGNC:15913]
TXNDC12	0.717001	thioredoxin domain containing 12 [Source:HGNC Symbol;Acc:HGNC:24626]
MTHFD1L	0.716508	methylenetetrahydrofolate dehydrogenase (NADP+ dependent) 1 like [Source:HGNC Symbol;Acc:HGNC:21055]
PLK4	0.716318	polo like kinase 4 [Source:HGNC Symbol;Acc:HGNC:11397]
PIK3AP1	0.716147	phosphoinositide+3+kinase adaptor protein 1 [Source:HGNC Symbol;Acc:HGNC:30034]
CTSD	0.715734	cathepsin D [Source:HGNC Symbol;Acc:HGNC:2529]
MRPS12	0.714556	mitochondrial ribosomal protein S12 [Source:HGNC Symbol;Acc:HGNC:10380]
NFU1	0.713536	NFU1 iron+sulfur cluster scaffold [Source:HGNC Symbol;Acc:HGNC:16287]
TUBA1B	0.713472	tubulin alpha 1b [Source:HGNC Symbol;Acc:HGNC:18809]
PYCARD	0.713247	PYD and CARD domain containing [Source:HGNC Symbol;Acc:HGNC:16608]
LGALS9C	0.71314	galectin 9C [Source:HGNC Symbol;Acc:HGNC:33874]
TSPAN10	0.71303	tetraspanin 10 [Source:HGNC Symbol;Acc:HGNC:29942]
IGFLR1	0.712753	IGF like family receptor 1 [Source:HGNC Symbol;Acc:HGNC:23620]
HNRNPLL	0.711917	heterogeneous nuclear ribonucleoprotein L like [Source:HGNC Symbol;Acc:HGNC:25127]
CD274	0.711671	CD274 molecule [Source:HGNC Symbol;Acc:HGNC:17635]
SKA1	0.711487	spindle and kinetochore associated complex subunit 1 [Source:HGNC Symbol;Acc:HGNC:28109]
ZBTB17	0.711238	zinc finger and BTB domain containing 17 [Source:HGNC Symbol;Acc:HGNC:12936]
SNRNP35	0.710888	small nuclear ribonucleoprotein U11/U12 subunit 35 [Source:HGNC Symbol;Acc:HGNC:30852]
VPS11	0.710744	VPS11 core subunit of CORVET and HOPS complexes [Source:HGNC Symbol;Acc:HGNC:14583]
PLEKHG7	0.710147	pleckstrin homology and RhoGEF domain containing G7 [Source:HGNC Symbol;Acc:HGNC:33829]
HLX	0.70996	H2.0 like homeobox [Source:HGNC Symbol;Acc:HGNC:4978]
SUSD3	0.709825	sushi domain containing 3 [Source:HGNC Symbol;Acc:HGNC:28391]
MKRN3	0.709419	makorin ring finger protein 3 [Source:HGNC Symbol;Acc:HGNC:7114]
CHCHD2	0.708831	coiled+coil+helix+coiled+coil+helix domain containing 2 [Source:HGNC Symbol;Acc:HGNC:21645]
HP	0.708774	haptoglobin [Source:HGNC Symbol;Acc:HGNC:5141]
FMO2	0.708747	flavin containing dimethylaniline monoxygenase 2 [Source:HGNC Symbol;Acc:HGNC:3770]
SMPD1	0.708091	sphingomyelin phosphodiesterase 1 [Source:HGNC Symbol;Acc:HGNC:11120]
SLC8A2	0.708086	solute carrier family 8 member A2 [Source:HGNC Symbol;Acc:HGNC:11069]
IDI2	0.707422	isopentenyl+diphosphate delta isomerase 2 [Source:HGNC Symbol;Acc:HGNC:23487]
GBP2	0.707154	guanylate binding protein 2 [Source:HGNC Symbol;Acc:HGNC:4183]
ITGA9	0.70683	integrin subunit alpha 9 [Source:HGNC Symbol;Acc:HGNC:6145]
FRMD6	0.706798	FERM domain containing 6 [Source:HGNC Symbol;Acc:HGNC:19839]
MYLK2	0.70672	myosin light chain kinase 2 [Source:HGNC Symbol;Acc:HGNC:16243]
NPFF	0.706188	neuropeptide FF+amide peptide precursor [Source:HGNC Symbol;Acc:HGNC:7901]
ARFGEF3	0.706159	ARFGEF family member 3 [Source:HGNC Symbol;Acc:HGNC:21213]
PIGC	0.70594	phosphatidylinositol glycan anchor biosynthesis class C [Source:HGNC Symbol;Acc:HGNC:8960]
TCOF1	0.705409	treacle ribosome biogenesis factor 1 [Source:HGNC Symbol;Acc:HGNC:11654]
GNA15	0.705253	G protein subunit alpha 15 [Source:HGNC Symbol;Acc:HGNC:4383]
NDUFA7	0.705206	NADH:ubiquinone oxidoreductase subunit A7 [Source:HGNC Symbol;Acc:HGNC:7691]
SAC3D1	0.705009	SAC3 domain containing 1 [Source:HGNC Symbol;Acc:HGNC:30179]
UROC1	0.704989	urocanate hydratase 1 [Source:HGNC Symbol;Acc:HGNC:26444]
CHCHD5	0.704955	coiled+coil+helix+coiled+coil+helix domain containing 5 [Source:HGNC Symbol;Acc:HGNC:17840]
TRIM21	0.704806	tripartite motif containing 21 [Source:HGNC Symbol;Acc:HGNC:11312]
DUSP23	0.704375	dual specificity phosphatase 23 [Source:HGNC Symbol;Acc:HGNC:21480]
GPR83	0.70414	G protein+coupled receptor 83 [Source:HGNC Symbol;Acc:HGNC:4523]
MYL4	0.703647	myosin light chain 4 [Source:HGNC Symbol;Acc:HGNC:7585]
EMC10	0.702955	ER membrane protein complex subunit 10 [Source:HGNC Symbol;Acc:HGNC:27609]
DDOST	0.702651	dolichyl+diphosphooligosaccharide++protein glycosyltransferase non+catalytic subunit [Source:HGNC Symbol;Acc:HGNC:2728]
LLGL1	0.702529	LLGL scribble cell polarity complex component 1 [Source:HGNC Symbol;Acc:HGNC:6628]
SLC2A14	0.702509	solute carrier family 2 member 14 [Source:HGNC Symbol;Acc:HGNC:18301]
CCL2	0.702462	C+C motif chemokine ligand 2 [Source:HGNC Symbol;Acc:HGNC:10618]
SGK3	0.702386	serum/glucocorticoid regulated kinase family member 3 [Source:HGNC Symbol;Acc:HGNC:10812]
KIF22	0.701122	kinesin family member 22 [Source:HGNC Symbol;Acc:HGNC:6391]
TBCC	0.701002	tubulin folding cofactor C [Source:HGNC Symbol;Acc:HGNC:11580]
ETV4	0.700393	ETS variant transcription factor 4 [Source:HGNC Symbol;Acc:HGNC:3493]
KRT10	0.699229	keratin 10 [Source:HGNC Symbol;Acc:HGNC:6413]
THOC7	0.69901	THO complex 7 [Source:HGNC Symbol;Acc:HGNC:29874]
KIFC1	0.698053	kinesin family member C1 [Source:HGNC Symbol;Acc:HGNC:6389]
CIT	0.698025	citron rho+interacting serine/threonine kinase [Source:HGNC Symbol;Acc:HGNC:1985]
PUS1	0.697785	pseudouridine synthase 1 [Source:HGNC Symbol;Acc:HGNC:15508]
HCFC1	0.697736	host cell factor C1 [Source:HGNC Symbol;Acc:HGNC:4839]
SEC13	0.697715	SEC13 homolog, nuclear pore and COPII coat complex component [Source:HGNC Symbol;Acc:HGNC:10697]
TMC7	0.697613	transmembrane channel like 7 [Source:HGNC Symbol;Acc:HGNC:23000]
URM1	0.697288	ubiquitin related modifier 1 [Source:HGNC Symbol;Acc:HGNC:28378]
TMEM159	0.6967	transmembrane protein 159 [Source:HGNC Symbol;Acc:HGNC:30136]
PDGFRB	0.695859	platelet derived growth factor receptor beta [Source:HGNC Symbol;Acc:HGNC:8804]
HELB	0.69537	DNA helicase B [Source:HGNC Symbol;Acc:HGNC:17196]
SDS	0.694673	serine dehydratase [Source:HGNC Symbol;Acc:HGNC:10691]
HFE	0.694526	homeostatic iron regulator [Source:HGNC Symbol;Acc:HGNC:4886]
MIIP	0.694478	migration and invasion inhibitory protein [Source:HGNC Symbol;Acc:HGNC:25715]
SNTA1	0.694457	syntrophin alpha 1 [Source:HGNC Symbol;Acc:HGNC:11167]
LGALS9	0.69351	galectin 9 [Source:HGNC Symbol;Acc:HGNC:6570]
ECHS1	0.693503	enoyl+CoA hydratase, short chain 1 [Source:HGNC Symbol;Acc:HGNC:3151]
NOP16	0.693153	NOP16 nucleolar protein [Source:HGNC Symbol;Acc:HGNC:26934]
NDUFB11	0.692846	NADH:ubiquinone oxidoreductase subunit B11 [Source:HGNC Symbol;Acc:HGNC:20372]
AMZ1	0.692639	archaelysin family metallopeptidase 1 [Source:HGNC Symbol;Acc:HGNC:22231]
CGNL1	0.691538	cingulin like 1 [Source:HGNC Symbol;Acc:HGNC:25931]
ZPR1	0.691497	ZPR1 zinc finger [Source:HGNC Symbol;Acc:HGNC:13051]
PLA2G4C	0.691109	phospholipase A2 group IVC [Source:HGNC Symbol;Acc:HGNC:9037]
FCER1A	0.691047	Fc fragment of IgE receptor Ia [Source:HGNC Symbol;Acc:HGNC:3609]
REEP1	0.691012	receptor accessory protein 1 [Source:HGNC Symbol;Acc:HGNC:25786]
TFAP2E	0.690352	transcription factor AP+2 epsilon [Source:HGNC Symbol;Acc:HGNC:30774]
MDK	0.690014	midkine [Source:HGNC Symbol;Acc:HGNC:6972]
PPCDC	0.68955	phosphopantothenoylcysteine decarboxylase [Source:HGNC Symbol;Acc:HGNC:28107]
LACTB	0.688926	lactamase beta [Source:HGNC Symbol;Acc:HGNC:16468]
CYP27B1	0.688908	cytochrome P450 family 27 subfamily B member 1 [Source:HGNC Symbol;Acc:HGNC:2606]
BPGM	0.68882	bisphosphoglycerate mutase [Source:HGNC Symbol;Acc:HGNC:1093]
DHRS2	0.688529	dehydrogenase/reductase 2 [Source:HGNC Symbol;Acc:HGNC:18349]
COIL	0.688246	coilin [Source:HGNC Symbol;Acc:HGNC:2184]
EML2	0.688024	EMAP like 2 [Source:HGNC Symbol;Acc:HGNC:18035]
FCGR1A	0.688023	Fc fragment of IgG receptor Ia [Source:HGNC Symbol;Acc:HGNC:3613]
TRMT1	0.687843	tRNA methyltransferase 1 [Source:HGNC Symbol;Acc:HGNC:25980]
KRBA1	0.687183	KRAB+A domain containing 1 [Source:HGNC Symbol;Acc:HGNC:22228]
ZFYVE19	0.685014	zinc finger FYVE+type containing 19 [Source:HGNC Symbol;Acc:HGNC:20758]
ELL3	0.684006	elongation factor for RNA polymerase II 3 [Source:HGNC Symbol;Acc:HGNC:23113]
ANAPC11	0.682757	anaphase promoting complex subunit 11 [Source:HGNC Symbol;Acc:HGNC:14452]
RGS16	0.682715	regulator of G protein signaling 16 [Source:HGNC Symbol;Acc:HGNC:9997]
TRAFD1	0.68248	TRAF+type zinc finger domain containing 1 [Source:HGNC Symbol;Acc:HGNC:24808]
GALNT16	0.682413	polypeptide N+acetylgalactosaminyltransferase 16 [Source:HGNC Symbol;Acc:HGNC:23233]
SRMS	0.682413	src+related kinase lacking C+terminal regulatory tyrosine and N+terminal myristylation sites [Source:HGNC Symbol;Acc:HGNC:11298]
CD300LF	0.681087	CD300 molecule like family member f [Source:HGNC Symbol;Acc:HGNC:29883]
INHBA	0.680934	inhibin subunit beta A [Source:HGNC Symbol;Acc:HGNC:6066]
GCH1	0.680924	GTP cyclohydrolase 1 [Source:HGNC Symbol;Acc:HGNC:4193]
SNRNP27	0.680175	small nuclear ribonucleoprotein U4/U6.U5 subunit 27 [Source:HGNC Symbol;Acc:HGNC:30240]
AZU1	0.680151	azurocidin 1 [Source:HGNC Symbol;Acc:HGNC:913]
DLGAP2	0.679883	DLG associated protein 2 [Source:HGNC Symbol;Acc:HGNC:2906]
GPR142	0.679707	G protein+coupled receptor 142 [Source:HGNC Symbol;Acc:HGNC:20088]
TAS2R9	0.679707	taste 2 receptor member 9 [Source:HGNC Symbol;Acc:HGNC:14917]
FBXL19	0.679695	F+box and leucine rich repeat protein 19 [Source:HGNC Symbol;Acc:HGNC:25300]
GCHFR	0.679649	GTP cyclohydrolase I feedback regulator [Source:HGNC Symbol;Acc:HGNC:4194]
ZNHIT1	0.679505	zinc finger HIT+type containing 1 [Source:HGNC Symbol;Acc:HGNC:21688]
BAD	0.67906	BCL2 associated agonist of cell death [Source:HGNC Symbol;Acc:HGNC:936]
FOXM1	0.67904	forkhead box M1 [Source:HGNC Symbol;Acc:HGNC:3818]
CD320	0.678978	CD320 molecule [Source:HGNC Symbol;Acc:HGNC:16692]
CYB561	0.678624	cytochrome b561 [Source:HGNC Symbol;Acc:HGNC:2571]
PDRG1	0.677685	p53 and DNA damage regulated 1 [Source:HGNC Symbol;Acc:HGNC:16119]
SNRPC	0.676479	small nuclear ribonucleoprotein polypeptide C [Source:HGNC Symbol;Acc:HGNC:11157]
FGF17	0.676294	fibroblast growth factor 17 [Source:HGNC Symbol;Acc:HGNC:3673]
SYTL5	0.676294	synaptotagmin like 5 [Source:HGNC Symbol;Acc:HGNC:15589]
DENND1A	0.676189	DENN domain containing 1A [Source:HGNC Symbol;Acc:HGNC:29324]
ZGPAT	0.675743	zinc finger CCCH+type and G+patch domain containing [Source:HGNC Symbol;Acc:HGNC:15948]
BABAM1	0.675036	BRISC and BRCA1 A complex member 1 [Source:HGNC Symbol;Acc:HGNC:25008]
TMEM222	0.674433	transmembrane protein 222 [Source:HGNC Symbol;Acc:HGNC:25363]
SLC35G3	0.674028	solute carrier family 35 member G3 [Source:HGNC Symbol;Acc:HGNC:26848]
RPF1	0.673641	ribosome production factor 1 homolog [Source:HGNC Symbol;Acc:HGNC:30350]
GPATCH3	0.673533	G+patch domain containing 3 [Source:HGNC Symbol;Acc:HGNC:25720]
BMP2	0.673305	bone morphogenetic protein 2 [Source:HGNC Symbol;Acc:HGNC:1069]
ZNF688	0.672935	zinc finger protein 688 [Source:HGNC Symbol;Acc:HGNC:30489]
SHANK1	0.67291	SH3 and multiple ankyrin repeat domains 1 [Source:HGNC Symbol;Acc:HGNC:15474]
TCTEX1D1	0.672887	Tctex1 domain containing 1 [Source:HGNC Symbol;Acc:HGNC:26882]
DAPP1	0.672192	dual adaptor of phosphotyrosine and 3+phosphoinositides 1 [Source:HGNC Symbol;Acc:HGNC:16500]
STAT1	0.671784	signal transducer and activator of transcription 1 [Source:HGNC Symbol;Acc:HGNC:11362]
CYTH2	0.671453	cytohesin 2 [Source:HGNC Symbol;Acc:HGNC:9502]
ZNF622	0.671427	zinc finger protein 622 [Source:HGNC Symbol;Acc:HGNC:30958]
PQBP1	0.67129	polyglutamine binding protein 1 [Source:HGNC Symbol;Acc:HGNC:9330]
CD200R1L	0.671215	CD200 receptor 1 like [Source:HGNC Symbol;Acc:HGNC:24665]
TRIM26	0.670881	tripartite motif containing 26 [Source:HGNC Symbol;Acc:HGNC:12962]
LONP1	0.670595	lon peptidase 1, mitochondrial [Source:HGNC Symbol;Acc:HGNC:9479]
USP18	0.670332	ubiquitin specific peptidase 18 [Source:HGNC Symbol;Acc:HGNC:12616]
KBTBD4	0.670304	kelch repeat and BTB domain containing 4 [Source:HGNC Symbol;Acc:HGNC:23761]
SEPHS2	0.669742	selenophosphate synthetase 2 [Source:HGNC Symbol;Acc:HGNC:19686]
CAPN10	0.669573	calpain 10 [Source:HGNC Symbol;Acc:HGNC:1477]
PEX5L	0.669193	peroxisomal biogenesis factor 5 like [Source:HGNC Symbol;Acc:HGNC:30024]
AUNIP	0.669148	aurora kinase A and ninein interacting protein [Source:HGNC Symbol;Acc:HGNC:28363]
ATF5	0.668612	activating transcription factor 5 [Source:HGNC Symbol;Acc:HGNC:790]
SPTBN1	0.668545	spectrin beta, non+erythrocytic 1 [Source:HGNC Symbol;Acc:HGNC:11275]
RNASE3	0.66849	ribonuclease A family member 3 [Source:HGNC Symbol;Acc:HGNC:10046]
RBM43	0.668041	RNA binding motif protein 43 [Source:HGNC Symbol;Acc:HGNC:24790]
TWF1	0.667833	twinfilin actin binding protein 1 [Source:HGNC Symbol;Acc:HGNC:9620]
SLC25A1	0.667224	solute carrier family 25 member 1 [Source:HGNC Symbol;Acc:HGNC:10979]
ZG16B	0.667209	zymogen granule protein 16B [Source:HGNC Symbol;Acc:HGNC:30456]
IGF2BP3	0.66646	insulin like growth factor 2 mRNA binding protein 3 [Source:HGNC Symbol;Acc:HGNC:28868]
RTP4	0.666438	receptor transporter protein 4 [Source:HGNC Symbol;Acc:HGNC:23992]
TRIL	0.666374	TLR4 interactor with leucine rich repeats [Source:HGNC Symbol;Acc:HGNC:22200]
KCTD17	0.666331	potassium channel tetramerization domain containing 17 [Source:HGNC Symbol;Acc:HGNC:25705]
SLC29A1	0.665959	solute carrier family 29 member 1 (Augustine blood group) [Source:HGNC Symbol;Acc:HGNC:11003]
STYXL1	0.66586	serine/threonine/tyrosine interacting like 1 [Source:HGNC Symbol;Acc:HGNC:18165]
RNF187	0.664648	ring finger protein 187 [Source:HGNC Symbol;Acc:HGNC:27146]
OR2L3	0.664434	olfactory receptor family 2 subfamily L member 3 [Source:HGNC Symbol;Acc:HGNC:15009]
MITD1	0.663807	microtubule interacting and trafficking domain containing 1 [Source:HGNC Symbol;Acc:HGNC:25207]
SHANK3	0.663769	SH3 and multiple ankyrin repeat domains 3 [Source:HGNC Symbol;Acc:HGNC:14294]
SHMT2	0.662988	serine hydroxymethyltransferase 2 [Source:HGNC Symbol;Acc:HGNC:10852]
LBP	0.662648	lipopolysaccharide binding protein [Source:HGNC Symbol;Acc:HGNC:6517]
TMED9	0.662158	transmembrane p24 trafficking protein 9 [Source:HGNC Symbol;Acc:HGNC:24878]
PDYN	0.661815	prodynorphin [Source:HGNC Symbol;Acc:HGNC:8820]
PRSS53	0.66139	serine protease 53 [Source:HGNC Symbol;Acc:HGNC:34407]
LRFN4	0.661253	leucine rich repeat and fibronectin type III domain containing 4 [Source:HGNC Symbol;Acc:HGNC:28456]
P2RY14	0.66094	purinergic receptor P2Y14 [Source:HGNC Symbol;Acc:HGNC:16442]
FAM151B	0.660938	family with sequence similarity 151 member B [Source:HGNC Symbol;Acc:HGNC:33716]
IRF9	0.660574	interferon regulatory factor 9 [Source:HGNC Symbol;Acc:HGNC:6131]
SLC39A8	0.660569	solute carrier family 39 member 8 [Source:HGNC Symbol;Acc:HGNC:20862]
TMEM52B	0.660101	transmembrane protein 52B [Source:HGNC Symbol;Acc:HGNC:26438]
PEX10	0.659687	peroxisomal biogenesis factor 10 [Source:HGNC Symbol;Acc:HGNC:8851]
MMP8	0.659399	matrix metallopeptidase 8 [Source:HGNC Symbol;Acc:HGNC:7175]
GSC	0.659323	goosecoid homeobox [Source:HGNC Symbol;Acc:HGNC:4612]
KRT81	0.659323	keratin 81 [Source:HGNC Symbol;Acc:HGNC:6458]
PXMP2	0.65932	peroxisomal membrane protein 2 [Source:HGNC Symbol;Acc:HGNC:9716]
TASL	0.658687	TLR adaptor interacting with endolysosomal SLC15A4 [Source:HGNC Symbol;Acc:HGNC:25667]
RGN	0.65852	regucalcin [Source:HGNC Symbol;Acc:HGNC:9989]
CLEC11A	0.658303	C+type lectin domain containing 11A [Source:HGNC Symbol;Acc:HGNC:10576]
DOCK1	0.658273	dedicator of cytokinesis 1 [Source:HGNC Symbol;Acc:HGNC:2987]
OR6K6	0.65806	olfactory receptor family 6 subfamily K member 6 [Source:HGNC Symbol;Acc:HGNC:15033]
EEFSEC	0.658003	eukaryotic elongation factor, selenocysteine+tRNA specific [Source:HGNC Symbol;Acc:HGNC:24614]
EMC9	0.657579	ER membrane protein complex subunit 9 [Source:HGNC Symbol;Acc:HGNC:20273]
TYMP	0.657351	thymidine phosphorylase [Source:HGNC Symbol;Acc:HGNC:3148]
UNC13C	0.656096	unc+13 homolog C [Source:HGNC Symbol;Acc:HGNC:23149]
ATAD3A	0.65601	ATPase family AAA domain containing 3A [Source:HGNC Symbol;Acc:HGNC:25567]
HCRT	0.655765	hypocretin neuropeptide precursor [Source:HGNC Symbol;Acc:HGNC:4847]
C17orf58	0.655739	chromosome 17 open reading frame 58 [Source:HGNC Symbol;Acc:HGNC:27568]
SMPD4	0.655121	sphingomyelin phosphodiesterase 4 [Source:HGNC Symbol;Acc:HGNC:32949]
SPNS1	0.654745	sphingolipid transporter 1 (putative) [Source:HGNC Symbol;Acc:HGNC:30621]
UPP2	0.654737	uridine phosphorylase 2 [Source:HGNC Symbol;Acc:HGNC:23061]
ATP1B3	0.654384	ATPase Na+/K+ transporting subunit beta 3 [Source:HGNC Symbol;Acc:HGNC:806]
CKB	0.654229	creatine kinase B [Source:HGNC Symbol;Acc:HGNC:1991]
ADAR	0.65419	adenosine deaminase RNA specific [Source:HGNC Symbol;Acc:HGNC:225]
GPC4	0.654146	glypican 4 [Source:HGNC Symbol;Acc:HGNC:4452]
TMEM147	0.653451	transmembrane protein 147 [Source:HGNC Symbol;Acc:HGNC:30414]
SPAG5	0.653318	sperm associated antigen 5 [Source:HGNC Symbol;Acc:HGNC:13452]
CD24	0.652887	CD24 molecule [Source:HGNC Symbol;Acc:HGNC:1645]
DTX3L	0.652489	deltex E3 ubiquitin ligase 3L [Source:HGNC Symbol;Acc:HGNC:30323]
PINLYP	0.652407	phospholipase A2 inhibitor and LY6/PLAUR domain containing [Source:HGNC Symbol;Acc:HGNC:44206]
OR4D1	0.652199	olfactory receptor family 4 subfamily D member 1 [Source:HGNC Symbol;Acc:HGNC:8293]
TMEM259	0.652104	transmembrane protein 259 [Source:HGNC Symbol;Acc:HGNC:17039]
RPL19	0.652085	ribosomal protein L19 [Source:HGNC Symbol;Acc:HGNC:10312]
LVRN	0.652064	laeverin [Source:HGNC Symbol;Acc:HGNC:26904]
FBXO7	0.652059	F+box protein 7 [Source:HGNC Symbol;Acc:HGNC:13586]
TRIM55	0.651199	tripartite motif containing 55 [Source:HGNC Symbol;Acc:HGNC:14215]
POC1A	0.650994	POC1 centriolar protein A [Source:HGNC Symbol;Acc:HGNC:24488]
MIEN1	0.650973	migration and invasion enhancer 1 [Source:HGNC Symbol;Acc:HGNC:28230]
DPP7	0.650851	dipeptidyl peptidase 7 [Source:HGNC Symbol;Acc:HGNC:14892]
FAS	0.650542	Fas cell surface death receptor [Source:HGNC Symbol;Acc:HGNC:11920]
GLRX5	0.650494	glutaredoxin 5 [Source:HGNC Symbol;Acc:HGNC:20134]
BTN3A2	0.650416	butyrophilin subfamily 3 member A2 [Source:HGNC Symbol;Acc:HGNC:1139]
HS3ST5	0.65033	heparan sulfate+glucosamine 3+sulfotransferase 5 [Source:HGNC Symbol;Acc:HGNC:19419]
EXD1	0.650207	exonuclease 3'+5' domain containing 1 [Source:HGNC Symbol;Acc:HGNC:28507]
BATF	0.649817	basic leucine zipper ATF+like transcription factor [Source:HGNC Symbol;Acc:HGNC:958]
CCDC62	0.649757	coiled+coil domain containing 62 [Source:HGNC Symbol;Acc:HGNC:30723]
TFB2M	0.649558	transcription factor B2, mitochondrial [Source:HGNC Symbol;Acc:HGNC:18559]
GAS2L3	0.64939	growth arrest specific 2 like 3 [Source:HGNC Symbol;Acc:HGNC:27475]
SLC34A3	0.649368	solute carrier family 34 member 3 [Source:HGNC Symbol;Acc:HGNC:20305]
FLRT1	0.649368	fibronectin leucine rich transmembrane protein 1 [Source:HGNC Symbol;Acc:HGNC:3760]
INCENP	0.649162	inner centromere protein [Source:HGNC Symbol;Acc:HGNC:6058]
PNPLA6	0.648997	patatin like phospholipase domain containing 6 [Source:HGNC Symbol;Acc:HGNC:16268]
NGEF	0.648772	neuronal guanine nucleotide exchange factor [Source:HGNC Symbol;Acc:HGNC:7807]
CDIPT	0.648769	CDP+diacylglycerol++inositol 3+phosphatidyltransferase [Source:HGNC Symbol;Acc:HGNC:1769]
APOBEC3A	0.648443	apolipoprotein B mRNA editing enzyme catalytic subunit 3A [Source:HGNC Symbol;Acc:HGNC:17343]
CACFD1	0.648438	calcium channel flower domain containing 1 [Source:HGNC Symbol;Acc:HGNC:1365]
KATNB1	0.648188	katanin regulatory subunit B1 [Source:HGNC Symbol;Acc:HGNC:6217]
UBE2C	0.647626	ubiquitin conjugating enzyme E2 C [Source:HGNC Symbol;Acc:HGNC:15937]
SLC27A3	0.6476	solute carrier family 27 member 3 [Source:HGNC Symbol;Acc:HGNC:10997]
VSNL1	0.647458	visinin like 1 [Source:HGNC Symbol;Acc:HGNC:12722]
AHCY	0.646825	adenosylhomocysteinase [Source:HGNC Symbol;Acc:HGNC:343]
RAD54L	0.646746	RAD54 like [Source:HGNC Symbol;Acc:HGNC:9826]
TMEM141	0.646555	transmembrane protein 141 [Source:HGNC Symbol;Acc:HGNC:28211]
TIMM13	0.64651	translocase of inner mitochondrial membrane 13 [Source:HGNC Symbol;Acc:HGNC:11816]
PFKP	0.646192	phosphofructokinase, platelet [Source:HGNC Symbol;Acc:HGNC:8878]
CRB2	0.646003	crumbs cell polarity complex component 2 [Source:HGNC Symbol;Acc:HGNC:18688]
DHDH	0.645964	dihydrodiol dehydrogenase [Source:HGNC Symbol;Acc:HGNC:17887]
POLR2L	0.645771	RNA polymerase II, I and III subunit L [Source:HGNC Symbol;Acc:HGNC:9199]
YBX2	0.6447	Y+box binding protein 2 [Source:HGNC Symbol;Acc:HGNC:17948]
ALDH4A1	0.644602	aldehyde dehydrogenase 4 family member A1 [Source:HGNC Symbol;Acc:HGNC:406]
DAW1	0.644441	dynein assembly factor with WD repeats 1 [Source:HGNC Symbol;Acc:HGNC:26383]
EVI5L	0.644367	ecotropic viral integration site 5 like [Source:HGNC Symbol;Acc:HGNC:30464]
C2CD2	0.644305	C2 calcium dependent domain containing 2 [Source:HGNC Symbol;Acc:HGNC:1266]
TMEM140	0.64415	transmembrane protein 140 [Source:HGNC Symbol;Acc:HGNC:21870]
PEX26	0.643805	peroxisomal biogenesis factor 26 [Source:HGNC Symbol;Acc:HGNC:22965]
SMARCD1	0.643753	SWI/SNF related, matrix associated, actin dependent regulator of chromatin, subfamily d, member 1 [Source:HGNC Symbol;Acc:HGNC:11106]
NEIL3	0.64371	nei like DNA glycosylase 3 [Source:HGNC Symbol;Acc:HGNC:24573]
CLEC18A	0.643705	C+type lectin domain family 18 member A [Source:HGNC Symbol;Acc:HGNC:30388]
SPHK1	0.643125	sphingosine kinase 1 [Source:HGNC Symbol;Acc:HGNC:11240]
TRMT112	0.642406	tRNA methyltransferase subunit 11+2 [Source:HGNC Symbol;Acc:HGNC:26940]
BNIPL	0.641476	BCL2 interacting protein like [Source:HGNC Symbol;Acc:HGNC:16976]
SMARCB1	0.641369	SWI/SNF related, matrix associated, actin dependent regulator of chromatin, subfamily b, member 1 [Source:HGNC Symbol;Acc:HGNC:11103]
FBXO27	0.641101	F+box protein 27 [Source:HGNC Symbol;Acc:HGNC:18753]
OAF	0.640934	out at first homolog [Source:HGNC Symbol;Acc:HGNC:28752]
SNTB1	0.640816	syntrophin beta 1 [Source:HGNC Symbol;Acc:HGNC:11168]
RFNG	0.640719	RFNG O+fucosylpeptide 3+beta+N+acetylglucosaminyltransferase [Source:HGNC Symbol;Acc:HGNC:9974]
SOX15	0.640482	SRY+box transcription factor 15 [Source:HGNC Symbol;Acc:HGNC:11196]
FGFBP1	0.639849	fibroblast growth factor binding protein 1 [Source:HGNC Symbol;Acc:HGNC:19695]
OGFR	0.63942	opioid growth factor receptor [Source:HGNC Symbol;Acc:HGNC:15768]
CAMK2N2	0.639268	calcium/calmodulin dependent protein kinase II inhibitor 2 [Source:HGNC Symbol;Acc:HGNC:24197]
CLDN18	0.63892	claudin 18 [Source:HGNC Symbol;Acc:HGNC:2039]
NR1D2	0.638749	nuclear receptor subfamily 1 group D member 2 [Source:HGNC Symbol;Acc:HGNC:7963]
HRAS	0.638569	HRas proto+oncogene, GTPase [Source:HGNC Symbol;Acc:HGNC:5173]
PRSS50	0.638223	serine protease 50 [Source:HGNC Symbol;Acc:HGNC:17910]
ZNF703	0.638105	zinc finger protein 703 [Source:HGNC Symbol;Acc:HGNC:25883]
HEPACAM2	0.637803	HEPACAM family member 2 [Source:HGNC Symbol;Acc:HGNC:27364]
FLCN	0.637564	folliculin [Source:HGNC Symbol;Acc:HGNC:27310]
CDKN3	0.637412	cyclin dependent kinase inhibitor 3 [Source:HGNC Symbol;Acc:HGNC:1791]
MED10	0.637323	mediator complex subunit 10 [Source:HGNC Symbol;Acc:HGNC:28760]
BATF2	0.636939	basic leucine zipper ATF+like transcription factor 2 [Source:HGNC Symbol;Acc:HGNC:25163]
PDIA3	0.636927	protein disulfide isomerase family A member 3 [Source:HGNC Symbol;Acc:HGNC:4606]
IL15RA	0.63656	interleukin 15 receptor subunit alpha [Source:HGNC Symbol;Acc:HGNC:5978]
PIWIL4	0.63651	piwi like RNA+mediated gene silencing 4 [Source:HGNC Symbol;Acc:HGNC:18444]
CTNNAL1	0.636378	catenin alpha like 1 [Source:HGNC Symbol;Acc:HGNC:2512]
DUS1L	0.636378	dihydrouridine synthase 1 like [Source:HGNC Symbol;Acc:HGNC:30086]
CDC42EP2	0.63605	CDC42 effector protein 2 [Source:HGNC Symbol;Acc:HGNC:16263]
TARBP2	0.635921	TARBP2 subunit of RISC loading complex [Source:HGNC Symbol;Acc:HGNC:11569]
DOT1L	0.635495	DOT1 like histone lysine methyltransferase [Source:HGNC Symbol;Acc:HGNC:24948]
NEURL1	0.635493	neuralized E3 ubiquitin protein ligase 1 [Source:HGNC Symbol;Acc:HGNC:7761]
TMEM94	0.635489	transmembrane protein 94 [Source:HGNC Symbol;Acc:HGNC:28983]
TIMM8B	0.635366	translocase of inner mitochondrial membrane 8 homolog B [Source:HGNC Symbol;Acc:HGNC:11818]
TLDC2	0.634989	TBC/LysM+associated domain containing 2 [Source:HGNC Symbol;Acc:HGNC:16112]
TMSB10	0.634784	thymosin beta 10 [Source:HGNC Symbol;Acc:HGNC:11879]
KSR1	0.634646	kinase suppressor of ras 1 [Source:HGNC Symbol;Acc:HGNC:6465]
ADCK5	0.634447	aarF domain containing kinase 5 [Source:HGNC Symbol;Acc:HGNC:21738]
SF3B5	0.634077	splicing factor 3b subunit 5 [Source:HGNC Symbol;Acc:HGNC:21083]
PARP3	0.633457	poly(ADP+ribose) polymerase family member 3 [Source:HGNC Symbol;Acc:HGNC:273]
STAT5A	0.63334	signal transducer and activator of transcription 5A [Source:HGNC Symbol;Acc:HGNC:11366]
MYBPC3	0.63323	myosin binding protein C3 [Source:HGNC Symbol;Acc:HGNC:7551]
ZFHX4	0.63256	zinc finger homeobox 4 [Source:HGNC Symbol;Acc:HGNC:30939]
KIF18B	0.632335	kinesin family member 18B [Source:HGNC Symbol;Acc:HGNC:27102]
ASCL2	0.631805	achaete+scute family bHLH transcription factor 2 [Source:HGNC Symbol;Acc:HGNC:739]
CMTM3	0.631317	CKLF like MARVEL transmembrane domain containing 3 [Source:HGNC Symbol;Acc:HGNC:19174]
RERE	0.631289	arginine+glutamic acid dipeptide repeats [Source:HGNC Symbol;Acc:HGNC:9965]
PCDHGC3	0.631187	protocadherin gamma subfamily C, 3 [Source:HGNC Symbol;Acc:HGNC:8716]
LRRC59	0.630954	leucine rich repeat containing 59 [Source:HGNC Symbol;Acc:HGNC:28817]
KRT7	0.630852	keratin 7 [Source:HGNC Symbol;Acc:HGNC:6445]
ITGA1	0.630551	integrin subunit alpha 1 [Source:HGNC Symbol;Acc:HGNC:6134]
IDUA	0.63011	alpha+L+iduronidase [Source:HGNC Symbol;Acc:HGNC:5391]
FAM117A	0.630093	family with sequence similarity 117 member A [Source:HGNC Symbol;Acc:HGNC:24179]
CPT1C	0.629679	carnitine palmitoyltransferase 1C [Source:HGNC Symbol;Acc:HGNC:18540]
DAPK3	0.629575	death associated protein kinase 3 [Source:HGNC Symbol;Acc:HGNC:2676]
APOA1	0.629523	apolipoprotein A1 [Source:HGNC Symbol;Acc:HGNC:600]
PIF1	0.629258	PIF1 5'+to+3' DNA helicase [Source:HGNC Symbol;Acc:HGNC:26220]
IGFBP5	0.62884	insulin like growth factor binding protein 5 [Source:HGNC Symbol;Acc:HGNC:5474]
PTPRH	0.62856	protein tyrosine phosphatase receptor type H [Source:HGNC Symbol;Acc:HGNC:9672]
AMIGO3	0.628551	adhesion molecule with Ig like domain 3 [Source:HGNC Symbol;Acc:HGNC:24075]
TTLL12	0.628544	tubulin tyrosine ligase like 12 [Source:HGNC Symbol;Acc:HGNC:28974]
D2HGDH	0.628229	D+2+hydroxyglutarate dehydrogenase [Source:HGNC Symbol;Acc:HGNC:28358]
DIRAS1	0.628148	DIRAS family GTPase 1 [Source:HGNC Symbol;Acc:HGNC:19127]
PTRHD1	0.628141	peptidyl+tRNA hydrolase domain containing 1 [Source:HGNC Symbol;Acc:HGNC:33782]
TUBA3E	0.628	tubulin alpha 3e [Source:HGNC Symbol;Acc:HGNC:20765]
CENPW	0.627903	centromere protein W [Source:HGNC Symbol;Acc:HGNC:21488]
NUCB1	0.627505	nucleobindin 1 [Source:HGNC Symbol;Acc:HGNC:8043]
LMOD3	0.626961	leiomodin 3 [Source:HGNC Symbol;Acc:HGNC:6649]
DNASE2	0.62695	deoxyribonuclease 2, lysosomal [Source:HGNC Symbol;Acc:HGNC:2960]
CSF1	0.626425	colony stimulating factor 1 [Source:HGNC Symbol;Acc:HGNC:2432]
LSM1	0.625322	LSM1 homolog, mRNA degradation associated [Source:HGNC Symbol;Acc:HGNC:20472]
FES	0.625038	FES proto+oncogene, tyrosine kinase [Source:HGNC Symbol;Acc:HGNC:3657]
CYSRT1	0.624938	cysteine rich tail 1 [Source:HGNC Symbol;Acc:HGNC:30529]
SMIM20	0.624927	small integral membrane protein 20 [Source:HGNC Symbol;Acc:HGNC:37260]
HTRA3	0.624838	HtrA serine peptidase 3 [Source:HGNC Symbol;Acc:HGNC:30406]
COX14	0.624443	cytochrome c oxidase assembly factor COX14 [Source:HGNC Symbol;Acc:HGNC:28216]
P2RY2	0.624184	purinergic receptor P2Y2 [Source:HGNC Symbol;Acc:HGNC:8541]
ZMIZ1	0.62378	zinc finger MIZ+type containing 1 [Source:HGNC Symbol;Acc:HGNC:16493]
AP5S1	0.623695	adaptor related protein complex 5 subunit sigma 1 [Source:HGNC Symbol;Acc:HGNC:15875]
COL20A1	0.622879	collagen type XX alpha 1 chain [Source:HGNC Symbol;Acc:HGNC:14670]
FAM83D	0.622126	family with sequence similarity 83 member D [Source:HGNC Symbol;Acc:HGNC:16122]
MDH2	0.621986	malate dehydrogenase 2 [Source:HGNC Symbol;Acc:HGNC:6971]
CCDC59	0.621985	coiled+coil domain containing 59 [Source:HGNC Symbol;Acc:HGNC:25005]
POLE	0.62124	DNA polymerase epsilon, catalytic subunit [Source:HGNC Symbol;Acc:HGNC:9177]
PATL1	0.620845	PAT1 homolog 1, processing body mRNA decay factor [Source:HGNC Symbol;Acc:HGNC:26721]
ATOH7	0.620616	atonal bHLH transcription factor 7 [Source:HGNC Symbol;Acc:HGNC:13907]
RANBP6	0.620457	RAN binding protein 6 [Source:HGNC Symbol;Acc:HGNC:9851]
PRKAG3	0.620175	protein kinase AMP+activated non+catalytic subunit gamma 3 [Source:HGNC Symbol;Acc:HGNC:9387]
ZNF282	0.619924	zinc finger protein 282 [Source:HGNC Symbol;Acc:HGNC:13076]
MRPL18	0.619844	mitochondrial ribosomal protein L18 [Source:HGNC Symbol;Acc:HGNC:14477]
ASGR2	0.619752	asialoglycoprotein receptor 2 [Source:HGNC Symbol;Acc:HGNC:743]
SRC	0.619618	SRC proto+oncogene, non+receptor tyrosine kinase [Source:HGNC Symbol;Acc:HGNC:11283]
CDKN1C	0.619288	cyclin dependent kinase inhibitor 1C [Source:HGNC Symbol;Acc:HGNC:1786]
SIRT6	0.619068	sirtuin 6 [Source:HGNC Symbol;Acc:HGNC:14934]
CFL2	0.618702	cofilin 2 [Source:HGNC Symbol;Acc:HGNC:1875]
NUCB2	0.618536	nucleobindin 2 [Source:HGNC Symbol;Acc:HGNC:8044]
MIA3	0.618161	MIA SH3 domain ER export factor 3 [Source:HGNC Symbol;Acc:HGNC:24008]
COX5B	0.618117	cytochrome c oxidase subunit 5B [Source:HGNC Symbol;Acc:HGNC:2269]
CCDC113	0.617733	coiled+coil domain containing 113 [Source:HGNC Symbol;Acc:HGNC:25002]
PLEKHH1	0.616918	pleckstrin homology, MyTH4 and FERM domain containing H1 [Source:HGNC Symbol;Acc:HGNC:17733]
CA14	0.616566	carbonic anhydrase 14 [Source:HGNC Symbol;Acc:HGNC:1372]
RPA4	0.61587	replication protein A4 [Source:HGNC Symbol;Acc:HGNC:30305]
TMEM17	0.615749	transmembrane protein 17 [Source:HGNC Symbol;Acc:HGNC:26623]
QTRT1	0.615716	queuine tRNA+ribosyltransferase catalytic subunit 1 [Source:HGNC Symbol;Acc:HGNC:23797]
NAV2	0.615655	neuron navigator 2 [Source:HGNC Symbol;Acc:HGNC:15997]
TNFSF13	0.615518	TNF superfamily member 13 [Source:HGNC Symbol;Acc:HGNC:11928]
LRRC61	0.614489	leucine rich repeat containing 61 [Source:HGNC Symbol;Acc:HGNC:21704]
TNK2	0.613847	tyrosine kinase non receptor 2 [Source:HGNC Symbol;Acc:HGNC:19297]
YBX1	0.613282	Y+box binding protein 1 [Source:HGNC Symbol;Acc:HGNC:8014]
KLHDC7B	0.612047	kelch domain containing 7B [Source:HGNC Symbol;Acc:HGNC:25145]
SVIP	0.610664	small VCP interacting protein [Source:HGNC Symbol;Acc:HGNC:25238]
STX17	0.610606	syntaxin 17 [Source:HGNC Symbol;Acc:HGNC:11432]
C21orf91	0.610291	chromosome 21 open reading frame 91 [Source:HGNC Symbol;Acc:HGNC:16459]
DHX37	0.610258	DEAH+box helicase 37 [Source:HGNC Symbol;Acc:HGNC:17210]
BRF2	0.610169	BRF2 RNA polymerase III transcription initiation factor subunit [Source:HGNC Symbol;Acc:HGNC:17298]
FFAR2	0.609685	free fatty acid receptor 2 [Source:HGNC Symbol;Acc:HGNC:4501]
NIPSNAP3A	0.609608	nipsnap homolog 3A [Source:HGNC Symbol;Acc:HGNC:23619]
PLAGL2	0.609553	PLAG1 like zinc finger 2 [Source:HGNC Symbol;Acc:HGNC:9047]
PIP4K2C	0.609227	phosphatidylinositol+5+phosphate 4+kinase type 2 gamma [Source:HGNC Symbol;Acc:HGNC:23786]
SCG3	0.609196	secretogranin III [Source:HGNC Symbol;Acc:HGNC:13707]
TMED3	0.609027	transmembrane p24 trafficking protein 3 [Source:HGNC Symbol;Acc:HGNC:28889]
PRKD2	0.6088	protein kinase D2 [Source:HGNC Symbol;Acc:HGNC:17293]
LCTL	0.608105	lactase like [Source:HGNC Symbol;Acc:HGNC:15583]
CENPB	0.608068	centromere protein B [Source:HGNC Symbol;Acc:HGNC:1852]
MS4A3	0.607455	membrane spanning 4+domains A3 [Source:HGNC Symbol;Acc:HGNC:7317]
BUB1B	0.606144	BUB1 mitotic checkpoint serine/threonine kinase B [Source:HGNC Symbol;Acc:HGNC:1149]
NKPD1	0.605898	NTPase KAP family P+loop domain containing 1 [Source:HGNC Symbol;Acc:HGNC:24739]
MAD2L1BP	0.605882	MAD2L1 binding protein [Source:HGNC Symbol;Acc:HGNC:21059]
MYO1C	0.605754	myosin IC [Source:HGNC Symbol;Acc:HGNC:7597]
RPL28	0.604663	ribosomal protein L28 [Source:HGNC Symbol;Acc:HGNC:10330]
IQSEC3	0.604428	IQ motif and Sec7 domain ArfGEF 3 [Source:HGNC Symbol;Acc:HGNC:29193]
BRMS1	0.603848	BRMS1 transcriptional repressor and anoikis regulator [Source:HGNC Symbol;Acc:HGNC:17262]
CDC25A	0.6034	cell division cycle 25A [Source:HGNC Symbol;Acc:HGNC:1725]
TRMT2A	0.603106	tRNA methyltransferase 2 homolog A [Source:HGNC Symbol;Acc:HGNC:24974]
NDUFA3	0.603084	NADH:ubiquinone oxidoreductase subunit A3 [Source:HGNC Symbol;Acc:HGNC:7686]
LTB	0.602961	lymphotoxin beta [Source:HGNC Symbol;Acc:HGNC:6711]
DLG2	0.602843	discs large MAGUK scaffold protein 2 [Source:HGNC Symbol;Acc:HGNC:2901]
SEC61B	0.602587	SEC61 translocon subunit beta [Source:HGNC Symbol;Acc:HGNC:16993]
GATA1	0.602375	GATA binding protein 1 [Source:HGNC Symbol;Acc:HGNC:4170]
ITPKB	0.601879	inositol+trisphosphate 3+kinase B [Source:HGNC Symbol;Acc:HGNC:6179]
GDPD3	0.601603	glycerophosphodiester phosphodiesterase domain containing 3 [Source:HGNC Symbol;Acc:HGNC:28638]
TPX2	0.601523	TPX2 microtubule nucleation factor [Source:HGNC Symbol;Acc:HGNC:1249]
MRPL49	0.600668	mitochondrial ribosomal protein L49 [Source:HGNC Symbol;Acc:HGNC:1176]
C7orf26	0.600226	chromosome 7 open reading frame 26 [Source:HGNC Symbol;Acc:HGNC:21702]
HSP90AA1	0.600212	heat shock protein 90 alpha family class A member 1 [Source:HGNC Symbol;Acc:HGNC:5253]
KIR3DL1	0.599616	killer cell immunoglobulin like receptor, three Ig domains and long cytoplasmic tail 1 [Source:HGNC Symbol;Acc:HGNC:6338]
MAD2L1	0.599585	mitotic arrest deficient 2 like 1 [Source:HGNC Symbol;Acc:HGNC:6763]
CEACAM8	0.599225	CEA cell adhesion molecule 8 [Source:HGNC Symbol;Acc:HGNC:1820]
NPM3	0.596903	nucleophosmin/nucleoplasmin 3 [Source:HGNC Symbol;Acc:HGNC:7931]
FAM180B	0.596647	family with sequence similarity 180 member B [Source:HGNC Symbol;Acc:HGNC:34451]
RAD51	0.59611	RAD51 recombinase [Source:HGNC Symbol;Acc:HGNC:9817]
CHCHD10	0.595767	coiled+coil+helix+coiled+coil+helix domain containing 10 [Source:HGNC Symbol;Acc:HGNC:15559]
EDEM2	0.595337	ER degradation enhancing alpha+mannosidase like protein 2 [Source:HGNC Symbol;Acc:HGNC:15877]
COPRS	0.595332	coordinator of PRMT5 and differentiation stimulator [Source:HGNC Symbol;Acc:HGNC:28848]
TP73	0.594948	tumor protein p73 [Source:HGNC Symbol;Acc:HGNC:12003]
SLC2A4RG	0.594914	SLC2A4 regulator [Source:HGNC Symbol;Acc:HGNC:15930]
CCDC120	0.594832	coiled+coil domain containing 120 [Source:HGNC Symbol;Acc:HGNC:28910]
IP6K2	0.59483	inositol hexakisphosphate kinase 2 [Source:HGNC Symbol;Acc:HGNC:17313]
ATP13A2	0.594617	ATPase cation transporting 13A2 [Source:HGNC Symbol;Acc:HGNC:30213]
LRRD1	0.594592	leucine rich repeats and death domain containing 1 [Source:HGNC Symbol;Acc:HGNC:34300]
CDC20	0.594497	cell division cycle 20 [Source:HGNC Symbol;Acc:HGNC:1723]
RAB34	0.594395	RAB34, member RAS oncogene family [Source:HGNC Symbol;Acc:HGNC:16519]
PCYT2	0.594288	phosphate cytidylyltransferase 2, ethanolamine [Source:HGNC Symbol;Acc:HGNC:8756]
CCDC167	0.594203	coiled+coil domain containing 167 [Source:HGNC Symbol;Acc:HGNC:21239]
LRRC4B	0.593726	leucine rich repeat containing 4B [Source:HGNC Symbol;Acc:HGNC:25042]
FOXP4	0.59343	forkhead box P4 [Source:HGNC Symbol;Acc:HGNC:20842]
MALSU1	0.593295	mitochondrial assembly of ribosomal large subunit 1 [Source:HGNC Symbol;Acc:HGNC:21721]
ARMC5	0.593194	armadillo repeat containing 5 [Source:HGNC Symbol;Acc:HGNC:25781]
NFKB1	0.592977	nuclear factor kappa B subunit 1 [Source:HGNC Symbol;Acc:HGNC:7794]
UCHL3	0.592673	ubiquitin C+terminal hydrolase L3 [Source:HGNC Symbol;Acc:HGNC:12515]
CDCA3	0.592561	cell division cycle associated 3 [Source:HGNC Symbol;Acc:HGNC:14624]
MPG	0.592427	N+methylpurine DNA glycosylase [Source:HGNC Symbol;Acc:HGNC:7211]
KANSL2	0.592423	KAT8 regulatory NSL complex subunit 2 [Source:HGNC Symbol;Acc:HGNC:26024]
EDC4	0.592057	enhancer of mRNA decapping 4 [Source:HGNC Symbol;Acc:HGNC:17157]
ASAP3	0.591692	ArfGAP with SH3 domain, ankyrin repeat and PH domain 3 [Source:HGNC Symbol;Acc:HGNC:14987]
CD300A	0.591673	CD300a molecule [Source:HGNC Symbol;Acc:HGNC:19319]
IFIT5	0.591047	interferon induced protein with tetratricopeptide repeats 5 [Source:HGNC Symbol;Acc:HGNC:13328]
PLSCR2	0.590928	phospholipid scramblase 2 [Source:HGNC Symbol;Acc:HGNC:16494]
MRPS18A	0.590729	mitochondrial ribosomal protein S18A [Source:HGNC Symbol;Acc:HGNC:14515]
BPI	0.590251	bactericidal permeability increasing protein [Source:HGNC Symbol;Acc:HGNC:1095]
DEFB1	0.590113	defensin beta 1 [Source:HGNC Symbol;Acc:HGNC:2766]
RELB	0.589888	RELB proto+oncogene, NF+kB subunit [Source:HGNC Symbol;Acc:HGNC:9956]
XRN1	0.58925	5'+3' exoribonuclease 1 [Source:HGNC Symbol;Acc:HGNC:30654]
FAM222A	0.589083	family with sequence similarity 222 member A [Source:HGNC Symbol;Acc:HGNC:25915]
AGPAT2	0.588781	1+acylglycerol+3+phosphate O+acyltransferase 2 [Source:HGNC Symbol;Acc:HGNC:325]
SLC27A4	0.588707	solute carrier family 27 member 4 [Source:HGNC Symbol;Acc:HGNC:10998]
DNAJC9	0.587948	DnaJ heat shock protein family (Hsp40) member C9 [Source:HGNC Symbol;Acc:HGNC:19123]
SNRPF	0.587867	small nuclear ribonucleoprotein polypeptide F [Source:HGNC Symbol;Acc:HGNC:11162]
ANTXRL	0.587782	ANTXR like [Source:HGNC Symbol;Acc:HGNC:27277]
ACSM1	0.587352	acyl+CoA synthetase medium chain family member 1 [Source:HGNC Symbol;Acc:HGNC:18049]
GGT5	0.587338	gamma+glutamyltransferase 5 [Source:HGNC Symbol;Acc:HGNC:4260]
EDF1	0.586988	endothelial differentiation related factor 1 [Source:HGNC Symbol;Acc:HGNC:3164]
CHEK1	0.586773	checkpoint kinase 1 [Source:HGNC Symbol;Acc:HGNC:1925]
ARL6IP4	0.586668	ADP ribosylation factor like GTPase 6 interacting protein 4 [Source:HGNC Symbol;Acc:HGNC:18076]
KIAA1614	0.586639	KIAA1614 [Source:HGNC Symbol;Acc:HGNC:29327]
ANKRD39	0.58641	ankyrin repeat domain 39 [Source:HGNC Symbol;Acc:HGNC:28640]
PRRT4	0.586288	proline rich transmembrane protein 4 [Source:HGNC Symbol;Acc:HGNC:37280]
MORN2	0.586051	MORN repeat containing 2 [Source:HGNC Symbol;Acc:HGNC:30166]
SLC16A12	0.585929	solute carrier family 16 member 12 [Source:HGNC Symbol;Acc:HGNC:23094]
ANKRD22	0.585851	ankyrin repeat domain 22 [Source:HGNC Symbol;Acc:HGNC:28321]
MAMDC2	0.58546	MAM domain containing 2 [Source:HGNC Symbol;Acc:HGNC:23673]
FIBP	0.585252	FGF1 intracellular binding protein [Source:HGNC Symbol;Acc:HGNC:3705]
PPRC1	0.585119	PPARG related coactivator 1 [Source:HGNC Symbol;Acc:HGNC:30025]
IL17RC	0.585068	interleukin 17 receptor C [Source:HGNC Symbol;Acc:HGNC:18358]
INA	0.584895	internexin neuronal intermediate filament protein alpha [Source:HGNC Symbol;Acc:HGNC:6057]
CCNA2	0.584832	cyclin A2 [Source:HGNC Symbol;Acc:HGNC:1578]
HES1	0.584803	hes family bHLH transcription factor 1 [Source:HGNC Symbol;Acc:HGNC:5192]
RNF113A	0.584396	ring finger protein 113A [Source:HGNC Symbol;Acc:HGNC:12974]
FBLN7	0.583303	fibulin 7 [Source:HGNC Symbol;Acc:HGNC:26740]
PLXNB2	0.5831	plexin B2 [Source:HGNC Symbol;Acc:HGNC:9104]
VILL	0.583056	villin like [Source:HGNC Symbol;Acc:HGNC:30906]
ESRP2	0.582984	epithelial splicing regulatory protein 2 [Source:HGNC Symbol;Acc:HGNC:26152]
PDE4D	0.582965	phosphodiesterase 4D [Source:HGNC Symbol;Acc:HGNC:8783]
CD7	0.582805	CD7 molecule [Source:HGNC Symbol;Acc:HGNC:1695]
KIR2DS4	0.582592	killer cell immunoglobulin like receptor, two Ig domains and short cytoplasmic tail 4 [Source:HGNC Symbol;Acc:HGNC:6336]
MAP3K19	0.582259	mitogen+activated protein kinase kinase kinase 19 [Source:HGNC Symbol;Acc:HGNC:26249]
SLC2A5	0.582038	solute carrier family 2 member 5 [Source:HGNC Symbol;Acc:HGNC:11010]
PPP1R17	0.581872	protein phosphatase 1 regulatory subunit 17 [Source:HGNC Symbol;Acc:HGNC:16973]
ADAMTSL4	0.58177	ADAMTS like 4 [Source:HGNC Symbol;Acc:HGNC:19706]
OR6K3	0.581737	olfactory receptor family 6 subfamily K member 3 [Source:HGNC Symbol;Acc:HGNC:15030]
OR52H1	0.581631	olfactory receptor family 52 subfamily H member 1 [Source:HGNC Symbol;Acc:HGNC:15218]
PEX16	0.58131	peroxisomal biogenesis factor 16 [Source:HGNC Symbol;Acc:HGNC:8857]
TSN	0.581169	translin [Source:HGNC Symbol;Acc:HGNC:12379]
BEX4	0.580237	brain expressed X+linked 4 [Source:HGNC Symbol;Acc:HGNC:25475]
LDHD	0.579897	lactate dehydrogenase D [Source:HGNC Symbol;Acc:HGNC:19708]
NPDC1	0.579664	neural proliferation, differentiation and control 1 [Source:HGNC Symbol;Acc:HGNC:7899]
TRIM6	0.579611	tripartite motif containing 6 [Source:HGNC Symbol;Acc:HGNC:16277]
KIF7	0.57959	kinesin family member 7 [Source:HGNC Symbol;Acc:HGNC:30497]
MAPK8IP2	0.579125	mitogen+activated protein kinase 8 interacting protein 2 [Source:HGNC Symbol;Acc:HGNC:6883]
C4BPB	0.578897	complement component 4 binding protein beta [Source:HGNC Symbol;Acc:HGNC:1328]
USP5	0.578873	ubiquitin specific peptidase 5 [Source:HGNC Symbol;Acc:HGNC:12628]
SLC5A11	0.578798	solute carrier family 5 member 11 [Source:HGNC Symbol;Acc:HGNC:23091]
GTF2A2	0.57859	general transcription factor IIA subunit 2 [Source:HGNC Symbol;Acc:HGNC:4647]
FSTL3	0.578175	follistatin like 3 [Source:HGNC Symbol;Acc:HGNC:3973]
ANKFY1	0.57774	ankyrin repeat and FYVE domain containing 1 [Source:HGNC Symbol;Acc:HGNC:20763]
GMNN	0.577587	geminin DNA replication inhibitor [Source:HGNC Symbol;Acc:HGNC:17493]
TNFAIP2	0.577574	TNF alpha induced protein 2 [Source:HGNC Symbol;Acc:HGNC:11895]
IFI27	0.576908	interferon alpha inducible protein 27 [Source:HGNC Symbol;Acc:HGNC:5397]
MAPK11	0.576891	mitogen+activated protein kinase 11 [Source:HGNC Symbol;Acc:HGNC:6873]
DDX47	0.576724	DEAD+box helicase 47 [Source:HGNC Symbol;Acc:HGNC:18682]
NPAS1	0.576582	neuronal PAS domain protein 1 [Source:HGNC Symbol;Acc:HGNC:7894]
MPST	0.576426	mercaptopyruvate sulfurtransferase [Source:HGNC Symbol;Acc:HGNC:7223]
OLR1	0.575666	oxidized low density lipoprotein receptor 1 [Source:HGNC Symbol;Acc:HGNC:8133]
RAD23A	0.575536	RAD23 homolog A, nucleotide excision repair protein [Source:HGNC Symbol;Acc:HGNC:9812]
AANAT	0.57513	aralkylamine N+acetyltransferase [Source:HGNC Symbol;Acc:HGNC:19]
WDR81	0.5748	WD repeat domain 81 [Source:HGNC Symbol;Acc:HGNC:26600]
LCN2	0.574415	lipocalin 2 [Source:HGNC Symbol;Acc:HGNC:6526]
RAI1	0.574107	retinoic acid induced 1 [Source:HGNC Symbol;Acc:HGNC:9834]
CDK15	0.573839	cyclin dependent kinase 15 [Source:HGNC Symbol;Acc:HGNC:14434]
MOCOS	0.573303	molybdenum cofactor sulfurase [Source:HGNC Symbol;Acc:HGNC:18234]
FKBPL	0.573106	FKBP prolyl isomerase like [Source:HGNC Symbol;Acc:HGNC:13949]
PMP22	0.57298	peripheral myelin protein 22 [Source:HGNC Symbol;Acc:HGNC:9118]
MICALL1	0.57284	MICAL like 1 [Source:HGNC Symbol;Acc:HGNC:29804]
LTF	0.572616	lactotransferrin [Source:HGNC Symbol;Acc:HGNC:6720]
REC8	0.572367	REC8 meiotic recombination protein [Source:HGNC Symbol;Acc:HGNC:16879]
HIC2	0.572276	HIC ZBTB transcriptional repressor 2 [Source:HGNC Symbol;Acc:HGNC:18595]
FLT3LG	0.572253	fms related receptor tyrosine kinase 3 ligand [Source:HGNC Symbol;Acc:HGNC:3766]
NUF2	0.572064	NUF2 component of NDC80 kinetochore complex [Source:HGNC Symbol;Acc:HGNC:14621]
PRG4	0.570656	proteoglycan 4 [Source:HGNC Symbol;Acc:HGNC:9364]
CADM2	0.570591	cell adhesion molecule 2 [Source:HGNC Symbol;Acc:HGNC:29849]
POLD4	0.57046	DNA polymerase delta 4, accessory subunit [Source:HGNC Symbol;Acc:HGNC:14106]
KIF4A	0.570211	kinesin family member 4A [Source:HGNC Symbol;Acc:HGNC:13339]
C14orf93	0.570133	chromosome 14 open reading frame 93 [Source:HGNC Symbol;Acc:HGNC:20162]
SP100	0.570013	SP100 nuclear antigen [Source:HGNC Symbol;Acc:HGNC:11206]
LTBR	0.569836	lymphotoxin beta receptor [Source:HGNC Symbol;Acc:HGNC:6718]
RCL1	0.569746	RNA terminal phosphate cyclase like 1 [Source:HGNC Symbol;Acc:HGNC:17687]
MLLT6	0.569642	MLLT6, PHD finger containing [Source:HGNC Symbol;Acc:HGNC:7138]
UBE2V1	0.569122	ubiquitin conjugating enzyme E2 V1 [Source:HGNC Symbol;Acc:HGNC:12494]
DNAJC2	0.56892	DnaJ heat shock protein family (Hsp40) member C2 [Source:HGNC Symbol;Acc:HGNC:13192]
OXER1	0.568652	oxoeicosanoid receptor 1 [Source:HGNC Symbol;Acc:HGNC:24884]
ABCA13	0.5686	ATP binding cassette subfamily A member 13 [Source:HGNC Symbol;Acc:HGNC:14638]
TMEM14C	0.567964	transmembrane protein 14C [Source:HGNC Symbol;Acc:HGNC:20952]
CEBPB	0.567676	CCAAT enhancer binding protein beta [Source:HGNC Symbol;Acc:HGNC:1834]
BRCA2	0.567239	BRCA2 DNA repair associated [Source:HGNC Symbol;Acc:HGNC:1101]
CRYM	0.567224	crystallin mu [Source:HGNC Symbol;Acc:HGNC:2418]
CBR1	0.567173	carbonyl reductase 1 [Source:HGNC Symbol;Acc:HGNC:1548]
NTAN1	0.567	N+terminal asparagine amidase [Source:HGNC Symbol;Acc:HGNC:29909]
FITM1	0.566761	fat storage inducing transmembrane protein 1 [Source:HGNC Symbol;Acc:HGNC:33714]
ATOX1	0.566724	antioxidant 1 copper chaperone [Source:HGNC Symbol;Acc:HGNC:798]
NACA2	0.566236	nascent polypeptide associated complex subunit alpha 2 [Source:HGNC Symbol;Acc:HGNC:23290]
PGLS	0.566148	6+phosphogluconolactonase [Source:HGNC Symbol;Acc:HGNC:8903]
STAB2	0.56611	stabilin 2 [Source:HGNC Symbol;Acc:HGNC:18629]
SPDYC	0.565733	speedy/RINGO cell cycle regulator family member C [Source:HGNC Symbol;Acc:HGNC:32681]
GJB2	0.565628	gap junction protein beta 2 [Source:HGNC Symbol;Acc:HGNC:4284]
TMEM161A	0.565546	transmembrane protein 161A [Source:HGNC Symbol;Acc:HGNC:26020]
NEU1	0.565469	neuraminidase 1 [Source:HGNC Symbol;Acc:HGNC:7758]
NOVA1	0.564485	NOVA alternative splicing regulator 1 [Source:HGNC Symbol;Acc:HGNC:7886]
SF3B2	0.564178	splicing factor 3b subunit 2 [Source:HGNC Symbol;Acc:HGNC:10769]
COX17	0.564031	cytochrome c oxidase copper chaperone COX17 [Source:HGNC Symbol;Acc:HGNC:2264]
SLC22A31	0.563928	solute carrier family 22 member 31 [Source:HGNC Symbol;Acc:HGNC:27091]
RS1	0.563788	retinoschisin 1 [Source:HGNC Symbol;Acc:HGNC:10457]
C11orf68	0.563668	chromosome 11 open reading frame 68 [Source:HGNC Symbol;Acc:HGNC:28801]
SLC12A7	0.563446	solute carrier family 12 member 7 [Source:HGNC Symbol;Acc:HGNC:10915]
APBA1	0.562501	amyloid beta precursor protein binding family A member 1 [Source:HGNC Symbol;Acc:HGNC:578]
GRIP1	0.562285	glutamate receptor interacting protein 1 [Source:HGNC Symbol;Acc:HGNC:18708]
LRP1	0.562125	LDL receptor related protein 1 [Source:HGNC Symbol;Acc:HGNC:6692]
SDHA	0.561845	succinate dehydrogenase complex flavoprotein subunit A [Source:HGNC Symbol;Acc:HGNC:10680]
FBXL22	0.560669	F+box and leucine rich repeat protein 22 [Source:HGNC Symbol;Acc:HGNC:27537]
DCTN3	0.560616	dynactin subunit 3 [Source:HGNC Symbol;Acc:HGNC:2713]
ECT2	0.560542	epithelial cell transforming 2 [Source:HGNC Symbol;Acc:HGNC:3155]
NAGPA	0.56034	N+acetylglucosamine+1+phosphodiester alpha+N+acetylglucosaminidase [Source:HGNC Symbol;Acc:HGNC:17378]
MCM4	0.560022	minichromosome maintenance complex component 4 [Source:HGNC Symbol;Acc:HGNC:6947]
MRPL9	0.559919	mitochondrial ribosomal protein L9 [Source:HGNC Symbol;Acc:HGNC:14277]
PRMT1	0.559761	protein arginine methyltransferase 1 [Source:HGNC Symbol;Acc:HGNC:5187]
SLC35G6	0.559517	solute carrier family 35 member G6 [Source:HGNC Symbol;Acc:HGNC:31351]
SFTPD	0.559448	surfactant protein D [Source:HGNC Symbol;Acc:HGNC:10803]
SSTR2	0.559407	somatostatin receptor 2 [Source:HGNC Symbol;Acc:HGNC:11331]
PLGRKT	0.559379	plasminogen receptor with a C+terminal lysine [Source:HGNC Symbol;Acc:HGNC:23633]
GBP3	0.559358	guanylate binding protein 3 [Source:HGNC Symbol;Acc:HGNC:4184]
PPIF	0.558617	peptidylprolyl isomerase F [Source:HGNC Symbol;Acc:HGNC:9259]
DVL2	0.558205	dishevelled segment polarity protein 2 [Source:HGNC Symbol;Acc:HGNC:3086]
POLR2E	0.558111	RNA polymerase II, I and III subunit E [Source:HGNC Symbol;Acc:HGNC:9192]
OSR2	0.558093	odd+skipped related transciption factor 2 [Source:HGNC Symbol;Acc:HGNC:15830]
TIMM44	0.557738	translocase of inner mitochondrial membrane 44 [Source:HGNC Symbol;Acc:HGNC:17316]
HMGN2	0.557506	high mobility group nucleosomal binding domain 2 [Source:HGNC Symbol;Acc:HGNC:4986]
MYBL2	0.557478	MYB proto+oncogene like 2 [Source:HGNC Symbol;Acc:HGNC:7548]
THRSP	0.557322	thyroid hormone responsive [Source:HGNC Symbol;Acc:HGNC:11800]
FBLIM1	0.55719	filamin binding LIM protein 1 [Source:HGNC Symbol;Acc:HGNC:24686]
TMEM160	0.556922	transmembrane protein 160 [Source:HGNC Symbol;Acc:HGNC:26042]
NECAB3	0.556823	N+terminal EF+hand calcium binding protein 3 [Source:HGNC Symbol;Acc:HGNC:15851]
FKBP6	0.556627	FKBP prolyl isomerase 6 [Source:HGNC Symbol;Acc:HGNC:3722]
MELK	0.556547	maternal embryonic leucine zipper kinase [Source:HGNC Symbol;Acc:HGNC:16870]
FAM32A	0.556397	family with sequence similarity 32 member A [Source:HGNC Symbol;Acc:HGNC:24563]
H2BC5	0.556311	H2B clustered histone 5 [Source:HGNC Symbol;Acc:HGNC:4747]
RABGGTA	0.556296	Rab geranylgeranyltransferase subunit alpha [Source:HGNC Symbol;Acc:HGNC:9795]
PRADC1	0.556086	protease associated domain containing 1 [Source:HGNC Symbol;Acc:HGNC:16047]
CADPS2	0.555835	calcium dependent secretion activator 2 [Source:HGNC Symbol;Acc:HGNC:16018]
UBE2Q1	0.555674	ubiquitin conjugating enzyme E2 Q1 [Source:HGNC Symbol;Acc:HGNC:15698]
ZNF512B	0.555599	zinc finger protein 512B [Source:HGNC Symbol;Acc:HGNC:29212]
TUBA1C	0.555225	tubulin alpha 1c [Source:HGNC Symbol;Acc:HGNC:20768]
DGCR6	0.555188	DiGeorge syndrome critical region gene 6 [Source:HGNC Symbol;Acc:HGNC:2846]
FAM160B2	0.554773	family with sequence similarity 160 member B2 [Source:HGNC Symbol;Acc:HGNC:16492]
CKAP2L	0.554756	cytoskeleton associated protein 2 like [Source:HGNC Symbol;Acc:HGNC:26877]
PSMB6	0.554577	proteasome 20S subunit beta 6 [Source:HGNC Symbol;Acc:HGNC:9543]
PACS2	0.554571	phosphofurin acidic cluster sorting protein 2 [Source:HGNC Symbol;Acc:HGNC:23794]
ORC6	0.554125	origin recognition complex subunit 6 [Source:HGNC Symbol;Acc:HGNC:17151]
ZGLP1	0.553073	zinc finger GATA like protein 1 [Source:HGNC Symbol;Acc:HGNC:37245]
RRM2	0.552964	ribonucleotide reductase regulatory subunit M2 [Source:HGNC Symbol;Acc:HGNC:10452]
C19orf44	0.552875	chromosome 19 open reading frame 44 [Source:HGNC Symbol;Acc:HGNC:26141]
UVRAG	0.552314	UV radiation resistance associated [Source:HGNC Symbol;Acc:HGNC:12640]
DNAL4	0.552291	dynein axonemal light chain 4 [Source:HGNC Symbol;Acc:HGNC:2955]
CDC42EP4	0.552242	CDC42 effector protein 4 [Source:HGNC Symbol;Acc:HGNC:17147]
HOXB9	0.552212	homeobox B9 [Source:HGNC Symbol;Acc:HGNC:5120]
MYL5	0.551746	myosin light chain 5 [Source:HGNC Symbol;Acc:HGNC:7586]
FLYWCH1	0.55155	FLYWCH+type zinc finger 1 [Source:HGNC Symbol;Acc:HGNC:25404]
TXNL4B	0.55121	thioredoxin like 4B [Source:HGNC Symbol;Acc:HGNC:26041]
APOBEC4	0.551149	apolipoprotein B mRNA editing enzyme catalytic polypeptide like 4 [Source:HGNC Symbol;Acc:HGNC:32152]
UNC93B1	0.550719	unc+93 homolog B1, TLR signaling regulator [Source:HGNC Symbol;Acc:HGNC:13481]
POU5F1	0.550585	POU class 5 homeobox 1 [Source:HGNC Symbol;Acc:HGNC:9221]
DZIP1L	0.550104	DAZ interacting zinc finger protein 1 like [Source:HGNC Symbol;Acc:HGNC:26551]
ACSL5	0.549906	acyl+CoA synthetase long chain family member 5 [Source:HGNC Symbol;Acc:HGNC:16526]
ZNF213	0.549614	zinc finger protein 213 [Source:HGNC Symbol;Acc:HGNC:13005]
ZNF684	0.549275	zinc finger protein 684 [Source:HGNC Symbol;Acc:HGNC:28418]
DNASE1	0.549054	deoxyribonuclease 1 [Source:HGNC Symbol;Acc:HGNC:2956]
CFAP53	0.548898	cilia and flagella associated protein 53 [Source:HGNC Symbol;Acc:HGNC:26530]
CD81	0.548736	CD81 molecule [Source:HGNC Symbol;Acc:HGNC:1701]
POLE3	0.548278	DNA polymerase epsilon 3, accessory subunit [Source:HGNC Symbol;Acc:HGNC:13546]
SPATA22	0.548255	spermatogenesis associated 22 [Source:HGNC Symbol;Acc:HGNC:30705]
PKIG	0.548085	cAMP+dependent protein kinase inhibitor gamma [Source:HGNC Symbol;Acc:HGNC:9019]
PSMG3	0.548082	proteasome assembly chaperone 3 [Source:HGNC Symbol;Acc:HGNC:22420]
MAP2K2	0.547845	mitogen+activated protein kinase kinase 2 [Source:HGNC Symbol;Acc:HGNC:6842]
NOSIP	0.547717	nitric oxide synthase interacting protein [Source:HGNC Symbol;Acc:HGNC:17946]
IKZF4	0.547438	IKAROS family zinc finger 4 [Source:HGNC Symbol;Acc:HGNC:13179]
EXO1	0.547288	exonuclease 1 [Source:HGNC Symbol;Acc:HGNC:3511]
PPP1R37	0.54694	protein phosphatase 1 regulatory subunit 37 [Source:HGNC Symbol;Acc:HGNC:27607]
RPLP2	0.546636	ribosomal protein lateral stalk subunit P2 [Source:HGNC Symbol;Acc:HGNC:10377]
EXOSC6	0.546443	exosome component 6 [Source:HGNC Symbol;Acc:HGNC:19055]
ISOC2	0.546427	isochorismatase domain containing 2 [Source:HGNC Symbol;Acc:HGNC:26278]
CYLD	0.546403	CYLD lysine 63 deubiquitinase [Source:HGNC Symbol;Acc:HGNC:2584]
RHAG	0.545633	Rh associated glycoprotein [Source:HGNC Symbol;Acc:HGNC:10006]
EMC7	0.545543	ER membrane protein complex subunit 7 [Source:HGNC Symbol;Acc:HGNC:24301]
ANXA4	0.545149	annexin A4 [Source:HGNC Symbol;Acc:HGNC:542]
AP1S1	0.54502	adaptor related protein complex 1 subunit sigma 1 [Source:HGNC Symbol;Acc:HGNC:559]
CIITA	0.544957	class II major histocompatibility complex transactivator [Source:HGNC Symbol;Acc:HGNC:7067]
ARL14EPL	0.544756	ADP ribosylation factor like GTPase 14 effector protein like [Source:HGNC Symbol;Acc:HGNC:44201]
FCGR1B	0.544019	Fc fragment of IgG receptor Ib [Source:HGNC Symbol;Acc:HGNC:3614]
PTCH2	0.543995	patched 2 [Source:HGNC Symbol;Acc:HGNC:9586]
FPGS	0.543989	folylpolyglutamate synthase [Source:HGNC Symbol;Acc:HGNC:3824]
SLC10A1	0.543872	solute carrier family 10 member 1 [Source:HGNC Symbol;Acc:HGNC:10905]
PARPBP	0.542899	PARP1 binding protein [Source:HGNC Symbol;Acc:HGNC:26074]
EFCAB2	0.542847	EF+hand calcium binding domain 2 [Source:HGNC Symbol;Acc:HGNC:28166]
H2AC6	0.542816	H2A clustered histone 6 [Source:HGNC Symbol;Acc:HGNC:4733]
CYB561A3	0.542713	cytochrome b561 family member A3 [Source:HGNC Symbol;Acc:HGNC:23014]
ZBTB49	0.542289	zinc finger and BTB domain containing 49 [Source:HGNC Symbol;Acc:HGNC:19883]
ICAM5	0.542284	intercellular adhesion molecule 5 [Source:HGNC Symbol;Acc:HGNC:5348]
CBX6	0.542219	chromobox 6 [Source:HGNC Symbol;Acc:HGNC:1556]
ITPK1	0.541845	inositol+tetrakisphosphate 1+kinase [Source:HGNC Symbol;Acc:HGNC:6177]
PSMB3	0.541794	proteasome 20S subunit beta 3 [Source:HGNC Symbol;Acc:HGNC:9540]
DUT	0.541741	deoxyuridine triphosphatase [Source:HGNC Symbol;Acc:HGNC:3078]
ALYREF	0.541469	Aly/REF export factor [Source:HGNC Symbol;Acc:HGNC:19071]
POLE2	0.541155	DNA polymerase epsilon 2, accessory subunit [Source:HGNC Symbol;Acc:HGNC:9178]
NRAS	0.54091	NRAS proto+oncogene, GTPase [Source:HGNC Symbol;Acc:HGNC:7989]
IFI27L1	0.540609	interferon alpha inducible protein 27 like 1 [Source:HGNC Symbol;Acc:HGNC:19754]
FAM83G	0.54057	family with sequence similarity 83 member G [Source:HGNC Symbol;Acc:HGNC:32554]
SIK1	0.540357	salt inducible kinase 1 [Source:HGNC Symbol;Acc:HGNC:11142]
CAPN1	0.540071	calpain 1 [Source:HGNC Symbol;Acc:HGNC:1476]
CHST2	0.540057	carbohydrate sulfotransferase 2 [Source:HGNC Symbol;Acc:HGNC:1970]
UTP15	0.539748	UTP15 small subunit processome component [Source:HGNC Symbol;Acc:HGNC:25758]
ILF2	0.538841	interleukin enhancer binding factor 2 [Source:HGNC Symbol;Acc:HGNC:6037]
SEMA3D	0.538767	semaphorin 3D [Source:HGNC Symbol;Acc:HGNC:10726]
FOXRED2	0.538136	FAD dependent oxidoreductase domain containing 2 [Source:HGNC Symbol;Acc:HGNC:26264]
SRP19	0.537919	signal recognition particle 19 [Source:HGNC Symbol;Acc:HGNC:11300]
CSRP3	0.537781	cysteine and glycine rich protein 3 [Source:HGNC Symbol;Acc:HGNC:2472]
ZHX2	0.537774	zinc fingers and homeoboxes 2 [Source:HGNC Symbol;Acc:HGNC:18513]
TNFRSF1B	0.537667	TNF receptor superfamily member 1B [Source:HGNC Symbol;Acc:HGNC:11917]
FEN1	0.537531	flap structure+specific endonuclease 1 [Source:HGNC Symbol;Acc:HGNC:3650]
LGSN	0.537376	lengsin, lens protein with glutamine synthetase domain [Source:HGNC Symbol;Acc:HGNC:21016]
C19orf47	0.53724	chromosome 19 open reading frame 47 [Source:HGNC Symbol;Acc:HGNC:26723]
HLA+DOB	0.537052	major histocompatibility complex, class II, DO beta [Source:HGNC Symbol;Acc:HGNC:4937]
TNFRSF14	0.536872	TNF receptor superfamily member 14 [Source:HGNC Symbol;Acc:HGNC:11912]
[truncated: 5,270 more rows]
