# Supplementary material for: Impact of BNT162b First Vaccination on the Immune Transcriptome of Elderly Patients Infected with the B.1.351 SARS-CoV-2 Variant
Source: Res Sq. 2021 Jun 1:rs.3.rs-509143. Preprint. [Version 1] doi: 10.21203/rs.3.rs-509143/v1 (PMC8183022; doi:10.21203/rs.3.rs-509143/v1)
Supplement: Supplement 6 [file ffa54529ed33c9f4775eccc9.xlsx]

## Sheet: B1351_Non_vaccine vs Non_vaccin
Gene	ID1_1st	ID6_1st	ID7_1st	ID14_1st	ID24_1st	log2FoldChange	pvalue	padj	meanNon_vaccine	meanNon_vaccine_young
A1BG	3.59139	3.39224	2.14926	1.90789	17.0435	1.39913	0.300723	NA	3.49181	7.03354
A1BG-AS1	26.3369	6.78447	3.22389	29.5724	19.0486	-0.0979375	0.874357	0.937175	16.5607	17.2816
A1CF	3.59139	3.39224	3.22389	3.81579	10.0256	0.73267	0.466333	NA	3.49181	5.68842
A2M	52.6738	84.8059	185.911	62.9605	108.276	0.645044	0.165981	0.344277	68.7398	119.049
A2M-AS1	21.5484	35.6185	38.6867	24.8026	31.0793	-0.00721758	0.990146	0.995479	28.5834	31.5229
A2ML1	4.78852	5.08835	2.14926	0.953947	1.00256	-1.84553	0.140888	NA	4.93844	1.36859
A2MP1	83.7992	69.5408	182.687	61.0526	69.1765	0.242266	0.672708	0.809594	76.67	104.305
A3GALT2	489.627	754.773	580.3	156.447	326.834	-0.966023	0.0110412	0.0569833	622.2	354.527
A4GNT	5.98565	1.69612	1.07463	2.86184	4.01023	-0.612958	0.601527	NA	3.84089	2.6489
AAAS	803.275	613.995	894.092	771.743	708.808	0.157344	0.263245	0.460074	708.635	791.548
AACS	155.627	150.955	147.224	176.48	155.396	0.0553322	0.85724	0.928864	153.291	159.7
AAED1	173.584	218.799	252.538	340.559	437.115	0.81236	0.00134241	0.0133721	196.192	343.404
AAGAB	1786.12	1497.67	1510.93	1926.02	2293.85	0.211235	0.241307	0.435229	1641.9	1910.27
AAK1	5045.91	4842.42	7387.01	7449.37	8009.43	0.619785	0.000149053	0.00277554	4944.16	7615.27
AAMDC	114.925	152.651	92.4182	219.408	186.476	0.279797	0.325629	0.52483	133.788	166.101
AAMP	1277.34	912.512	896.241	1425.2	1102.81	0.0551377	0.781196	0.881368	1094.93	1141.42
AANAT	126.896	145.866	290.15	181.25	411.048	1.05792	0.0314021	0.114206	136.381	294.149
AAR2	286.114	432.51	562.031	717.368	694.772	0.872537	0.000104928	0.00218778	359.312	658.057
AARD	0	3.39224	4.29852	5.72368	0	0.710531	0.682899	NA	1.69612	3.34073
AARS	791.304	346.008	485.733	1044.57	885.258	0.533825	0.108809	0.262021	568.656	805.188
AARS2	180.767	176.396	246.09	270.921	320.818	0.650833	0.000388807	0.00557231	178.582	279.276
AASDH	487.232	322.262	498.628	816.579	400.02	0.476248	0.0169848	0.0760872	404.747	571.742
AASDHPPT	763.77	444.383	477.136	1227.73	691.765	0.351964	0.0861595	0.224907	604.076	798.877
AASS	228.652	162.827	205.254	110.658	229.586	-0.132421	0.700652	0.828471	195.74	181.833
AATBC	123.304	55.9719	95.6421	230.855	123.315	0.74102	0.0883775	0.22847	89.6382	149.937
AATF	2591.79	3638.17	2726.34	2444.97	2443.23	-0.272595	0.0253008	0.0989257	3114.98	2538.18
AATK	226.258	803.96	274.031	93.4868	197.504	-1.40307	0.0384788	0.130975	515.109	188.34
ABALON	3.59139	33.9224	20.418	7.63158	12.0307	-0.179988	0.807278	0.897786	18.7569	13.3601
ABAT	2536.72	3326.09	1824.72	1536.81	1905.86	-0.728897	0.0178872	0.0786688	2931.4	1755.8
ABCA1	16234.3	22970.5	13270.6	18044.9	22660.8	-0.0879553	0.831813	0.913049	19602.4	17992.1
ABCA10	198.724	232.368	132.179	88.7171	99.2532	-1.02852	0.000592894	0.00746265	215.546	106.717
ABCA11P	87.3906	39.0107	78.448	103.98	61.156	0.422932	0.293798	0.492405	63.2006	81.1947
ABCA12	5.98565	1.69612	4.29852	0.953947	7.0179	0.217595	0.862185	NA	3.84089	4.09012
ABCA13	457.304	1334.85	400.837	663.947	421.074	-0.677715	0.593531	0.751976	896.075	495.286
ABCA17P	4.78852	6.78447	5.37315	4.76973	2.00511	-0.561122	0.579697	NA	5.7865	4.04933
ABCA2	2110.54	3449.9	2487.77	1072.24	2398.12	-0.51444	0.237206	0.431257	2780.22	1986.04
ABCA3	47.8852	54.2758	62.3285	64.8684	48.1227	0.144077	0.751134	0.861335	51.0805	58.4399
ABCA4	0	6.78447	1.07463	0.953947	0	-2.13613	0.284074	NA	3.39224	0.676192
ABCA5	3225.07	4148.71	2808.01	1614.08	1760.49	-0.872915	0.00399633	0.0279975	3686.89	2060.86
ABCA6	53.8709	32.2262	1668.9	138.322	11.0281	3.07162	0.000912638	0.0101412	43.0486	606.084
ABCA7	5423	6998.18	2549.02	1465.26	4487.45	-1.16714	0.00492725	0.0326381	6210.59	2833.91
ABCA9	58.6594	57.668	1058.51	40.0658	15.0384	1.47599	0.0652706	0.187011	58.1637	371.205
ABCB1	181.964	184.877	706.032	622.927	319.816	1.42121	0.00141237	0.0138506	183.42	549.592
ABCB10	1219.88	924.384	1365.85	1864.01	1196.05	0.45197	0.00496714	0.0328053	1072.13	1475.31
ABCB11	77.8135	44.0991	33.3135	90.625	23.0588	-0.382218	0.677827	0.813444	60.9563	48.9991
ABCB4	79.0106	11.8728	141.851	66.7763	81.2071	1.21632	0.20326	0.391495	45.4417	96.6115
ABCB6	446.53	395.196	284.777	408.289	219.56	-0.477564	0.0939564	0.237565	420.863	304.209
ABCB7	700.322	424.03	661.972	1048.39	624.593	0.451518	0.012363	0.0618926	562.176	778.318
ABCB8	184.358	181.485	238.568	176.48	297.76	0.365339	0.187059	0.37248	182.921	237.603
ABCB9	44.2938	5.08835	51.5822	20.0329	36.0921	0.640891	0.388475	0.584091	24.6911	35.9024
ABCC1	1980.05	1942.06	1562.51	2273.26	1870.77	-0.0610739	0.752985	0.862196	1961.05	1902.18
ABCC10	629.691	574.984	862.928	650.592	659.683	0.267621	0.168725	0.348084	602.337	724.401
ABCC11	156.824	308.694	221.374	103.026	6.01534	-1.15918	0.237698	0.431751	232.759	110.138
ABCC13	2.39426	3.39224	5.37315	0	0	-1.17923	0.508527	NA	2.89325	1.79105
ABCC2	997.21	1036.33	645.853	565.691	725.851	-0.67188	0.0104095	0.0547686	1016.77	645.798
ABCC3	763.77	1282.27	243.941	832.796	780.992	-0.826813	0.135166	0.300521	1023.02	619.243
ABCC4	957.705	478.305	494.33	1090.36	1138.91	0.450185	0.456067	0.647586	718.005	907.865
ABCC5	5208.72	10870.4	2870.34	2822.73	1203.07	-1.73999	6.45633e-05	0.00152914	8039.57	2298.71
ABCC5-AS1	2.39426	8.48059	3.22389	0.953947	0	-2.02186	0.285317	NA	5.43743	1.39261
ABCC6	985.239	1731.74	990.809	423.552	180.46	-1.3551	0.0125907	0.062624	1358.49	531.607
ABCC6P1	14.3656	5.08835	42.9852	15.2632	0	0.860208	0.434479	0.627159	9.72696	19.4161
ABCC8	0	5.08835	0	0.953947	0	-1.5627	0.743973	NA	2.54418	0.317982
ABCD1	158.021	212.015	144	229.901	228.583	0.115587	0.784491	0.883139	185.018	200.828
ABCD2	172.387	72.9331	344.956	228.947	448.143	1.54424	1.6393e-06	0.00010665	122.66	340.682
ABCD3	735.038	639.437	771.584	1108.49	807.059	0.366018	0.029242	0.109033	687.237	895.71
ABCD4	979.253	915.904	1210.03	1042.66	986.516	0.191769	0.332345	0.531122	947.578	1079.74
ABCE1	1055.87	612.299	1090.75	1567.33	1449.7	0.744737	0.000942224	0.0103129	834.084	1369.26
ABCF1	1023.55	1399.3	1406.69	1593.09	3426.74	0.830619	0.0120452	0.0608429	1211.42	2142.17
ABCF2	1031.93	561.415	767.286	1617.89	961.452	0.451811	0.00145018	0.0140998	796.671	1115.54
ABCF3	2120.12	4606.66	3695.65	1407.07	2767.06	-0.389528	0.0701724	0.196724	3363.39	2623.26
ABCG1	3317.25	6738.68	2460.9	2539.41	2140.46	-0.975501	0.00461665	0.0311734	5027.96	2380.26
ABCG2	22.7455	3.39224	7.52241	31.4802	15.0384	0.704192	0.460592	0.65136	13.0689	18.0137
ABCG4	2.39426	0	0	0	0	-2.82391	0.310807	NA	1.19713	0
ABHD1	32.3225	15.2651	11.8209	23.8487	19.0486	-0.378956	0.524175	0.70059	23.7938	18.2394
ABHD10	677.576	273.075	548.061	1023.59	554.414	0.597441	0.0247543	0.0976655	475.326	708.687
ABHD11	343.577	262.898	175.165	169.803	123.315	-0.950066	0.000426974	0.00591912	303.237	156.094
ABHD11-AS1	15.5627	6.78447	4.29852	6.67763	3.00767	-1.25453	0.280697	NA	11.1736	4.66127
ABHD12	259.777	171.308	218.15	333.881	284.726	0.36324	0.0594909	0.175926	215.543	278.919
ABHD12B	906.228	1148.27	764.062	697.335	554.414	-0.601555	0.163302	0.340299	1027.25	671.937
ABHD13	4710.71	6056.84	5451.6	3480.95	4114.49	-0.315097	0.00801584	0.0454296	5383.77	4349.01
ABHD14A	20.3512	40.7068	23.6419	28.6184	24.0614	-0.266372	0.560019	0.727709	30.529	25.4405
ABHD14B	492.021	254.418	448.121	535.164	412.051	0.360711	0.0306963	0.112566	373.219	465.112
ABHD15	220.272	162.827	346.031	357.73	192.491	0.642439	0.0244389	0.0969868	191.55	298.751
ABHD16A	4193.55	7905.61	4568.25	2086.28	4280.92	-0.730554	0.000400333	0.00567238	6049.58	3645.15
ABHD16B	15.5627	11.8728	3.22389	8.58552	10.0256	-0.965929	0.192886	NA	13.7178	7.27833
ABHD17A	67.0393	196.75	78.448	37.2039	102.261	-0.929197	0.0720694	0.200244	131.895	72.6376
ABHD17B	906.228	761.557	1309.97	911.019	620.583	0.172019	0.472985	0.660826	833.893	947.192
ABHD17C	229.849	167.916	390.091	106.842	63.1611	-0.25691	0.6819	0.816021	198.882	186.698
ABHD2	10508.4	16862.8	14495.7	20768.4	9290.7	0.132064	0.679352	0.814248	13685.6	14851.6
ABHD3	11302.1	14084.6	9148.32	5029.21	7863.06	-0.823734	0.000163412	0.00296544	12693.3	7346.86
ABHD4	2232.65	4082.56	2657.56	1680.85	1559.98	-0.646244	0.0155932	0.0719303	3157.6	1966.13
ABHD5	11828.9	24907.5	14060.5	7060.16	4809.27	-1.02358	0.00738776	0.0431279	18368.2	8643.3
ABHD6	120.91	135.689	118.209	375.855	57.1458	0.240558	0.583125	0.744711	128.3	183.737
ABHD8	23.9426	11.8728	11.8209	24.8026	36.0921	0.415698	0.523554	0.700207	17.9077	24.2385
ABI1	10035.5	15263.4	9440.62	9255.19	10062.7	-0.365679	0.0124885	0.0622398	12649.5	9586.16
ABI2	873.906	590.249	1426.03	632.467	1125.87	0.4726	0.00844606	0.0470367	732.077	1061.46
ABI3	822.429	1034.63	620.061	624.835	237.606	-1.00052	0.0184499	0.0802653	928.531	494.168
ABI3BP	27.534	28.834	33.3135	13.3553	46.1176	0.023064	0.970722	0.985313	28.184	30.9288
ABL1	560.257	586.857	809.196	892.894	813.074	0.547833	0.000175368	0.00313058	573.557	838.388
ABL2	1381.49	2050.61	2278.22	1822.04	2812.17	0.440252	0.0241263	0.0965715	1716.05	2304.14
ABLIM1	2650.45	2191.38	3929.92	2750.23	6436.42	0.826879	0.0247945	0.0977503	2420.92	4372.19
ABLIM2	9.57705	5.08835	18.2687	3.81579	18.046	0.614644	0.438869	0.63146	7.3327	13.3768
ABLIM3	2121.32	2550.96	469.613	1217.24	957.442	-1.4026	0.0191392	0.0823047	2336.14	881.431
ABO	59.8565	39.0107	20.418	107.796	101.258	0.489516	0.463379	0.653572	49.4336	76.4908
ABR	4110.95	7829.28	6435.96	4492.14	4909.52	-0.11964	0.613462	0.765436	5970.11	5279.21
ABRA	15.5627	15.2651	10.7463	13.3553	7.0179	-0.589915	0.446144	0.638879	15.4139	10.3732
ABRACL	1725.07	1261.91	883.346	2382.96	2177.55	0.209053	0.474423	0.661963	1493.49	1814.62
ABT1	307.663	415.549	415.882	417.829	499.274	0.299855	0.149184	0.319893	361.606	444.328
ABTB1	10002	21550.9	9133.28	5065.46	3850.82	-1.32622	0.00422263	0.0291205	15776.5	6016.52
ABTB2	142.459	259.506	135.403	129.737	329.841	0.0453259	0.906894	0.953604	200.982	198.327
ACAA1	5718.69	6599.6	3221.74	3067.89	2907.42	-0.997466	2.60477e-06	0.000149052	6159.15	3065.68
ACAA2	651.239	732.723	756.539	1818.22	841.146	0.594725	0.00410225	0.0285423	691.981	1138.64
ACACA	411.813	234.064	552.36	710.69	760.941	1.08699	7.88916e-06	0.000333407	322.939	674.664
ACACB	363.928	739.508	789.853	340.559	445.135	-0.133882	0.65022	0.792753	551.718	525.182
ACAD10	1302.48	1112.65	1082.15	1355.56	1063.71	-0.0581849	0.707979	0.833694	1207.57	1167.14
ACAD11	22.7455	18.6573	21.4926	22.8947	45.1151	0.566847	0.224884	0.417259	20.7014	29.8341
ACAD8	1443.74	1853.86	2167.53	1287.83	1343.43	-0.0546472	0.791108	0.887209	1648.8	1599.59
ACAD9	399.842	396.892	346.031	536.118	402.025	0.0831474	0.570399	0.736193	398.367	428.058
ACADM	790.106	530.885	747.942	1480.53	797.033	0.566163	0.0115595	0.058902	660.496	1008.5
ACADS	29.9283	28.834	39.7613	47.6973	47.1202	0.618066	0.135889	0.301786	29.3811	44.8596
ACADSB	804.472	798.872	1121.91	1113.26	707.805	0.285762	0.169177	0.348788	801.672	980.992
ACADVL	8839.61	8307.59	8005.99	8234.47	6890.58	-0.152543	0.441483	0.63429	8573.6	7710.35
ACAN	0	0	5.37315	2.86184	15.0384	4.90074	0.00364905	NA	0	7.75778
ACAP1	4613.74	10926.4	6775.54	4638.09	5048.88	-0.409269	0.130803	0.294748	7770.07	5487.5
ACAP2	25035.6	26759.7	22832.7	20164.5	20335.9	-0.300315	0.072971	0.201926	25897.6	21111
ACAP3	469.275	464.736	357.852	298.585	382.977	-0.41586	0.129873	0.293709	467.006	346.471
ACAT1	542.3	398.588	533.016	678.256	681.739	0.42943	0.0253096	0.0989352	470.444	631.004
ACAT2	227.455	230.672	192.359	275.691	384.982	0.309839	0.306984	0.506067	229.063	284.344
ACBD3	1879.5	1723.26	2055.77	2361.02	1969.02	0.23623	0.0931726	0.236193	1801.38	2128.6
ACBD4	198.724	139.082	243.941	224.178	182.465	0.373364	0.188914	0.37491	168.903	216.861
ACBD5	1885.48	1762.27	1657.08	1884.05	1875.78	-0.0167348	0.883511	0.942409	1823.87	1805.64
ACBD6	471.67	980.356	491.106	506.546	317.811	-0.635668	0.0233458	0.0945837	726.013	438.487
ACBD7	499.204	456.256	223.523	128.783	29.0742	-1.86174	0.0216276	0.0898763	477.73	127.127
ACCS	610.537	276.467	1012.3	783.19	1907.87	1.49235	0.00100946	0.0108597	443.502	1234.45
ACCSL	25.1397	37.3146	9.67167	5.72368	7.0179	-2.06803	0.0215035	0.0896208	31.2272	7.47108
ACD	247.806	217.103	154.747	103.98	112.286	-0.9204	2.32706e-05	0.00073265	232.455	123.671
ACE	10.7742	8.48059	13.9702	27.6645	68.1739	1.97317	0.0178452	0.078572	9.62738	36.6028
ACE2	50.2795	113.64	35.4628	27.6645	35.0895	-1.19422	0.00623851	0.0382982	81.9597	32.7389
ACER1	8.37992	13.5689	11.8209	10.4934	19.0486	0.309832	0.663291	0.802264	10.9744	13.7876
ACER2	53.8709	32.2262	73.0748	120.197	69.1765	1.03212	0.0162661	0.0739453	43.0486	87.4829
ACER3	2141.67	2167.64	1528.12	2907.63	2612.66	0.0821368	0.711094	0.835462	2154.65	2349.47
ACIN1	13366	15731.5	12358.2	12139.9	12892.9	-0.216392	0.0124743	0.0622091	14548.7	12463.7
ACKR1	2.39426	1.69612	2.14926	0	1.00256	-0.731414	0.718207	NA	2.04519	1.05061
ACKR2	8.37992	3.39224	7.52241	9.53947	1.00256	0.0147459	0.986824	NA	5.88608	6.02148
ACKR3	17.957	42.403	139.702	66.7763	28.0716	1.1419	0.112051	0.266963	30.18	78.1833
ACKR4	113.727	62.7564	95.6421	38.1579	64.1637	-0.541751	0.0942329	0.238102	88.2419	65.9879
ACLY	2888.68	3039.44	2716.66	4356.68	3279.36	0.19503	0.0991756	0.245962	2964.06	3450.9
ACMSD	28.7311	23.7457	23.6419	12.4013	26.0665	-0.392849	0.445243	0.63794	26.2384	20.7032
ACO1	702.716	778.518	463.165	728.815	2067.27	0.542873	0.248484	0.443228	740.617	1086.42
ACO2	679.97	637.74	764.062	1180.03	964.46	0.537993	0.00555851	0.0353625	658.855	969.518
ACOT1	15.5627	16.9612	4.29852	37.2039	2.00511	-0.742561	0.384132	0.580567	16.2619	14.5025
ACOT11	3.59139	8.48059	5.37315	4.76973	4.01023	-0.436021	0.684923	NA	6.03599	4.7177
ACOT12	4.78852	3.39224	4.29852	0.953947	1.00256	-1.05198	0.518139	NA	4.09038	2.08501
ACOT13	1273.75	1495.98	996.182	1121.84	1062.71	-0.377641	0.00388961	0.0274585	1384.86	1060.24
ACOT2	96.9676	78.0214	162.269	126.875	112.286	0.623918	0.0112322	0.0577218	87.4945	133.81
ACOT4	4.78852	16.9612	16.1194	11.4474	6.01534	-0.0522937	0.944673	0.972175	10.8749	11.1941
ACOT7	27.534	57.668	25.7911	29.5724	28.0716	-0.713795	0.208169	0.397308	42.601	27.8117
ACOT8	232.243	361.273	235.344	252.796	213.545	-0.328648	0.200963	0.388808	296.758	233.895
ACOT9	2357.15	2946.16	1881.68	2820.82	4471.41	0.20845	0.449897	0.642142	2651.65	3057.97
ACOX1	10847.2	23352.2	12121.8	9613.88	7861.05	-0.697751	0.0489414	0.153451	17099.7	9865.58
ACOX2	7.18279	15.2651	5.37315	24.8026	10.0256	0.0404981	0.954071	0.977002	11.2239	13.4004
ACOX3	167.598	191.661	164.418	222.27	228.583	0.189783	0.355585	0.554196	179.63	205.09
ACOXL	106.545	42.403	19.3433	26.7105	63.1611	-1.16796	0.116075	0.273428	74.4738	36.405
ACP1	1243.82	797.176	1343.29	1679.9	1552.96	0.600134	0.000362791	0.00533102	1020.5	1525.38
ACP2	225.061	200.142	208.478	583.816	390.997	0.7902	0.000569357	0.00724589	212.601	394.43
ACP5	298.086	173.004	319.165	248.98	139.355	0.0172075	0.964799	0.982104	235.545	235.834
ACP6	275.34	471.521	311.643	401.612	164.419	-0.340142	0.331469	0.530317	373.43	292.558
ACPP	2185.96	2540.79	1090.75	2470.72	1461.73	-0.610452	0.0755622	0.206085	2363.37	1674.4
ACPT	4.78852	5.08835	2.14926	3.81579	15.0384	0.468847	0.674278	NA	4.93844	7.00114
ACRBP	2213.5	3678.88	769.435	2577.56	2243.72	-0.701314	0.164004	0.341353	2946.19	1863.57
ACRC	488.429	798.872	739.345	464.572	547.396	-0.133885	0.527586	0.703403	643.651	583.771
ACRV1	1.19713	0	1.07463	0.953947	3.00767	1.2456	0.518912	NA	0.598565	1.67875
ACSBG1	93.3762	130.601	25.7911	18.125	31.0793	-2.17022	0.000468922	0.00628417	111.989	24.9985
ACSBG2	14.3656	25.4418	13.9702	20.9868	19.0486	-0.159829	0.786862	0.884856	19.9037	18.0019
ACSF2	345.971	125.513	257.911	248.026	206.527	0.100285	0.795856	0.889515	235.742	237.488
ACSF3	237.032	215.407	237.493	231.809	326.834	0.237251	0.311025	0.509509	226.219	265.379
ACSL1	183208	307671	211912	142707	165671	-0.485966	0.173567	0.354158	245439	173430
ACSL3	3160.43	4001.14	4392.01	3771.91	4362.13	0.223191	0.21462	0.404983	3580.78	4175.35
ACSL4	8174.01	16857.7	13191.1	15022.8	7831.98	0.0386295	0.883959	0.942509	12515.9	12015.3
ACSL5	1899.85	2303.33	2564.07	3252.96	3047.77	0.491481	0.00606049	0.0374842	2101.59	2954.93
ACSL6	154.43	303.605	148.299	271.875	360.921	0.0185488	0.974859	0.987455	229.018	260.365
ACSM1	9.57705	8.48059	27.9404	10.4934	39.0997	1.39109	0.0215113	0.0896294	9.02882	25.8445
ACSM3	35.9139	30.5301	39.7613	56.2829	64.1637	0.706085	0.0331399	0.118562	33.222	53.4026
ACSM4	17.957	0	8.59704	135.46	20.0511	1.99693	0.0915556	0.233225	8.97848	54.7029
ACSM6	0	0	2.14926	0.953947	1.00256	2.35883	0.306845	NA	0	1.36859
ACSS1	1884.28	1002.41	1543.17	1339.34	1452.71	0.0509813	0.735708	0.851705	1443.34	1445.07
ACSS2	2662.42	2991.95	1885.98	2422.07	2265.78	-0.374379	0.0251398	0.0985672	2827.19	2191.28
ACSS3	41.8996	98.3749	73.0748	6.67763	38.0972	-1.15648	0.0817726	0.217639	70.1372	39.2832
ACTA2	98.1647	156.043	162.269	152.632	223.57	0.53207	0.10643	0.258198	127.104	179.49
ACTA2-AS1	31.1254	8.48059	44.0598	12.4013	72.1841	0.897234	0.0933242	0.236424	19.803	42.8818
ACTB	170592	284787	114790	113999	101591	-0.99996	1.79633e-06	0.000114027	227690	110127
ACTG1	30982.9	37837	18798.5	23046.4	13863.4	-0.890419	9.40256e-06	0.000384916	34410	18569.4
ACTG1P17	81.4049	39.0107	65.5524	18.125	85.2174	-0.217077	0.591589	0.750568	60.2078	56.2983
ACTG1P20	292.1	641.133	618.987	433.092	667.703	0.347136	0.127074	0.289299	466.616	573.261
ACTG1P4	55.068	25.4418	59.1046	30.5263	41.1048	0.0356413	0.929064	0.963046	40.2549	43.5786
ACTG2	2.39426	0	1.07463	0	0	-1.43148	0.594694	NA	1.19713	0.35821
ACTL10	4.78852	0	4.29852	4.76973	7.0179	1.3637	0.356526	NA	2.39426	5.36205
ACTL6A	572.229	424.03	544.837	1068.42	491.253	0.435538	0.0279969	0.1058	498.129	701.504
ACTN1	12714.7	24013.6	11227.7	11495.1	13423.2	-0.533608	0.0702357	0.196823	18364.2	12048.7
ACTN1-AS1	4.78852	3.39224	4.29852	5.72368	8.02046	0.575724	0.664521	NA	4.09038	6.01422
ACTN2	1.19713	0	0	0.953947	4.01023	1.42398	0.584051	NA	0.598565	1.65473
ACTN3	2.39426	0	7.52241	1.90789	0	1.27484	0.464865	NA	1.19713	3.14343
ACTN4	4223.48	6341.79	4350.1	4723.95	4073.39	-0.239039	0.217507	0.408028	5282.63	4382.48
ACTR10	2559.47	3142.91	1989.14	2222.7	2027.17	-0.446466	0.00140223	0.013807	2851.19	2079.67
ACTR1A	3439.36	5212.17	3224.96	4263.19	3422.73	-0.23343	0.122001	0.281882	4325.76	3636.96
ACTR1B	654.831	727.635	845.734	701.151	705.8	0.114726	0.662752	0.801774	691.233	750.895
ACTR2	52655.8	84061.3	47361.1	66239.2	37689.1	-0.420848	0.0338588	0.120325	68358.6	50429.8
ACTR3	30196.4	50664.7	26147.9	24295.1	30914.9	-0.532878	0.000522426	0.0068089	40430.6	27119.3
ACTR3B	166.401	195.054	87.045	203.191	111.284	-0.516604	0.183094	0.367148	180.727	133.84
ACTR3C	38.3082	35.6185	60.1793	20.9868	43.11	0.0355767	0.915474	0.957312	36.9633	41.4254
ACTR5	380.688	254.418	610.39	262.335	349.892	0.279174	0.160681	0.336808	317.553	407.539
ACTR6	456.107	395.196	580.3	968.256	585.493	0.70828	8.67737e-05	0.00191085	425.651	711.35
ACTR8	605.748	620.779	845.734	1028.35	545.391	0.386444	0.104101	0.254159	613.264	806.493
ACTRT3	4.78852	1.69612	3.22389	8.58552	2.00511	0.485837	0.72652	NA	3.24232	4.60484
ACVR1	665.605	615.691	297.672	688.75	731.867	-0.201836	0.447455	0.639823	640.648	572.763
ACVR1B	2881.49	4191.11	2531.83	5083.58	1456.72	-0.283976	0.356135	0.554749	3536.3	3024.04
ACVR1C	149.641	45.7952	145.075	73.4539	335.857	1.03112	0.0748318	0.204937	97.7183	184.795
ACVR2A	521.949	332.439	470.688	435.954	767.959	0.427703	0.238026	0.432079	427.194	558.2
ACVR2B	179.57	235.76	233.195	289.046	527.345	0.72491	0.13464	0.299949	207.665	349.862
ACVR2B-AS1	4.78852	3.39224	4.29852	0.953947	2.00511	-0.87907	0.446359	NA	4.09038	2.41919
ACVRL1	20.3512	32.2262	12.8956	198.421	25.0639	0.690725	0.153776	0.326635	26.2887	78.7935
ACY3	9.57705	3.39224	7.52241	0	2.00511	-1.33542	0.283083	NA	6.48464	3.17584
ACYP1	234.638	144.17	219.224	190.789	291.744	0.330599	0.199884	0.387293	189.404	233.919
ACYP2	84.9963	54.2758	42.9852	85.8552	104.266	0.167607	0.637064	0.783468	69.636	77.7021
ADA	249.003	212.015	314.867	281.414	397.013	0.498584	0.190643	0.376887	230.509	331.098
ADAD2	2.39426	0	4.29852	0	3.00767	1.57085	0.48646	NA	1.19713	2.4354
ADAL	152.036	132.297	85.9704	165.033	93.2378	-0.350531	0.151385	0.323285	142.166	114.747
ADAM10	9981.68	10958.6	8081.22	14314.9	7925.22	-0.0948926	0.572703	0.73765	10470.1	10107.1
ADAM11	5.98565	16.9612	4.29852	10.4934	13.0332	-0.306093	0.699631	NA	11.4734	9.27506
ADAM12	47.8852	28.834	35.4628	32.4342	24.0614	-0.278154	0.63187	0.779943	38.3596	30.6528
ADAM15	1148.05	1265.3	695.286	1064.6	890.271	-0.461212	0.0889882	0.229105	1206.68	883.387
ADAM17	6817.66	12943.1	7062.47	7977.86	6516.62	-0.40219	0.140401	0.308052	9880.37	7185.65
ADAM19	11681.6	18124.7	14656.9	13181.6	5483.99	-0.383377	0.308778	0.507701	14903.2	11107.5
ADAM1A	240.623	215.407	346.031	482.697	186.476	0.527749	0.132403	0.296775	228.015	338.401
ADAM20	33.5197	22.0495	4.29852	5.72368	28.0716	-1.09855	0.0959121	0.240917	27.7846	12.6979
ADAM20P1	94.5733	81.4137	55.8808	32.4342	78.1995	-0.708662	0.0238472	0.0958462	87.9935	55.5048
ADAM21	7.18279	3.39224	13.9702	11.4474	11.0281	1.23609	0.116497	0.273888	5.28751	12.1486
ADAM22	153.233	140.778	221.374	129.737	165.422	0.197781	0.443458	0.636311	147.005	172.177
ADAM23	56.2652	33.9224	17.1941	53.421	93.2378	0.298948	0.718134	0.840291	45.0938	54.6176
ADAM28	7717.9	2567.92	4640.25	1748.58	1728.41	-0.953837	0.0319561	0.115474	5142.91	2705.75
ADAM30	4.78852	1.69612	0	0.953947	2.00511	-2.0083	0.316849	NA	3.24232	0.986354
ADAM32	10.7742	25.4418	3.22389	1.90789	12.0307	-1.66309	0.0532986	NA	18.108	5.72082
ADAM33	0	0	0	0	2.00511	1.26895	0.622232	NA	0	0.668372
ADAM8	6075.44	11269	4640.25	1927.93	5733.62	-1.09824	0.00243329	0.0199537	8672.22	4100.6
ADAM9	3322.04	3901.07	2513.56	5441.31	3693.42	0.036048	0.89439	0.948086	3611.56	3882.76
ADAMDEC1	26.3369	13.5689	16.1194	80.1315	23.0588	0.57729	0.308878	0.507701	19.9529	39.7699
ADAMTS1	83.7992	117.032	159.045	425.46	50.1279	0.534675	0.401723	0.598329	100.416	211.544
ADAMTS10	95.7705	178.092	309.493	99.2105	228.583	0.299758	0.578424	0.741464	136.931	212.429
ADAMTS13	9.57705	8.48059	13.9702	12.4013	14.0358	0.582256	0.347001	0.545645	9.02882	13.4691
ADAMTS14	2.39426	6.78447	3.22389	6.67763	4.01023	-0.0914359	0.924681	0.96173	4.58937	4.63725
ADAMTS15	1.19713	1.69612	2.14926	0	2.00511	-0.559647	0.850044	NA	1.44662	1.38479
ADAMTS16	1.19713	0	9.67167	2.86184	4.01023	3.02539	0.0381722	NA	0.598565	5.51458
ADAMTS17	29.9283	45.7952	45.1345	5.72368	74.1892	-0.0918247	0.898885	0.950189	37.8617	41.6825
ADAMTS2	2092.58	2243.96	1820.42	4336.64	309.79	-0.168608	0.875249	0.937645	2168.27	2155.62
ADAMTS3	9.57705	66.1486	3.22389	9.53947	0	-2.60303	0.0471237	NA	37.8628	4.25445
ADAMTS4	10.7742	11.8728	6.44778	14.3092	9.02302	-0.243373	0.739689	0.854304	11.3235	9.92667
ADAMTS5	53.8709	10.1767	0	20.9868	2.00511	-3.656	5.87427e-05	0.00144236	32.0238	7.66398
ADAMTS6	27.534	30.5301	148.299	82.0394	82.2097	1.81969	0.000210565	0.00358463	29.0321	104.183
ADAMTS7P1	0	6.78447	5.37315	0	1.00256	-0.73557	0.620134	NA	3.39224	2.12524
ADAMTS8	7.18279	0	2.14926	3.81579	0	-0.74889	0.513143	NA	3.59139	1.98835
ADAMTSL4	4935.77	8378.82	5511.78	3756.64	6386.29	-0.309618	0.307287	0.506194	6657.3	5218.24
ADAMTSL4-AS1	596.171	703.889	581.375	337.697	638.629	-0.368816	0.230885	0.424386	650.03	519.234
ADAMTSL5	15.5627	11.8728	30.0896	7.63158	47.1202	0.858175	0.199411	0.386909	13.7178	28.2805
ADAP1	515.963	1026.15	494.33	434.046	472.204	-0.650274	0.0614017	0.179404	771.057	466.86
ADAP2	979.253	695.408	389.016	1895.49	1444.68	0.379172	0.274045	0.471932	837.331	1243.06
ADAR	43170.9	56993	40330.9	59968.9	79096.8	0.257292	0.264913	0.461452	50081.9	59798.8
ADARB1	991.224	781.91	848.958	860.46	1906.86	0.454031	0.206835	0.39587	886.567	1205.43
ADARB2	2.39426	703.889	341.732	1.90789	668.706	0.209126	0.927046	0.962717	353.142	337.449
ADAT1	993.619	1911.53	1975.17	1360.33	858.189	-0.050288	0.877262	0.938687	1452.57	1397.9
ADAT2	926.579	581.769	1040.24	865.23	1032.63	0.402392	0.026193	0.101159	754.174	979.369
ADAT3	5.98565	16.9612	17.1941	5.72368	12.0307	0.0899329	0.893956	0.948011	11.4734	11.6495
ADCK1	392.659	96.6787	135.403	171.71	248.634	-0.106505	0.860013	0.930672	244.669	185.249
ADCK2	113.727	96.6787	153.672	149.77	169.432	0.605267	0.084991	0.223164	105.203	157.625
ADCK3	1322.83	1389.12	1105.79	861.414	671.713	-0.610601	0.0190799	0.0821493	1355.98	879.641
ADCK4	433.361	826.01	638.33	573.322	338.864	-0.242332	0.427869	0.621681	629.685	516.839
ADCK5	32.3225	18.6573	32.2389	22.8947	55.1406	0.587882	0.2983	0.496923	25.4899	36.7581
ADCY1	3.59139	1.69612	7.52241	2.86184	5.01279	0.945714	0.521065	NA	2.64376	5.13235
ADCY10	69.4336	71.237	81.6719	29.5724	43.11	-0.549718	0.187712	0.373543	70.3353	51.4514
ADCY10P1	3243.03	3393.93	2867.11	1296.41	2392.1	-0.697208	0.00185238	0.0164646	3318.48	2185.21
ADCY3	199.921	305.301	194.508	217.5	275.703	-0.103213	0.754149	0.863151	252.611	229.237
ADCY4	1520.36	1864.03	986.51	914.835	1177	-0.729853	0.0017505	0.0160223	1692.2	1026.12
ADCY5	20.3512	8.48059	26.8657	36.25	12.0307	0.909512	0.0834568	0.220364	14.4159	25.0488
ADCY6	82.602	61.0603	10.7463	72.5	20.0511	-1.36415	0.0536487	0.163618	71.8311	34.4325
ADCY7	14067.5	15855.3	16446.1	19665.6	15749.2	0.20684	0.080974	0.216543	14961.4	17287
ADCY9	162.81	137.386	146.15	227.993	229.586	0.457782	0.241467	0.435419	150.098	201.243
ADD1	9991.25	12369.8	10315.4	8471.05	7336.71	-0.351823	0.0518226	0.159761	11180.5	8707.71
ADD2	57.4623	13.5689	10.7463	36.25	120.307	1.0124	0.26062	0.456872	35.5156	55.7677
ADD3	18845.2	25954	22755.3	29026.7	12006.6	-0.0702244	0.80173	0.894112	22399.6	21262.9
ADD3-AS1	98.1647	100.071	36.5374	43.8816	15.0384	-1.63909	0.00124603	0.0126942	99.1179	31.8191
ADGB	52.6738	66.1486	19.3433	42.9276	7.0179	-1.42604	0.0858845	0.224685	59.4112	23.0963
ADGRA2	37.1111	62.7564	45.1345	259.474	79.202	0.906766	0.106226	0.2579	49.9337	127.937
ADGRA3	13.1684	42.403	41.9106	32.4342	78.1995	0.790578	0.225461	0.417891	27.7857	50.8481
ADGRB1	19.1541	11.8728	15.0448	1.90789	8.02046	-1.20172	0.0769586	0.208771	15.5135	8.32439
ADGRB2	4.78852	16.9612	11.8209	11.4474	17.0435	0.284382	0.689394	0.821166	10.8749	13.4373
ADGRB3	38.3082	13.5689	15.0448	30.5263	0	-0.820513	0.51266	0.692215	25.9386	15.1904
ADGRD1	16.7598	10.1767	8.59704	66.7763	22.0563	0.837033	0.145624	0.315311	13.4683	32.4765
ADGRE1	709.899	4934.01	430.927	3189.04	3036.75	-0.205143	0.736567	0.852172	2821.95	2218.91
ADGRE2	11391.9	34058.1	14282.9	9291.44	8944.82	-0.875703	0.0148684	0.0697341	22725	10839.7
ADGRE3	7155.25	15680.6	7216.14	4156.35	3419.72	-1.13417	0.00886696	0.0488493	11417.9	4930.74
ADGRE4P	331.605	325.655	124.657	276.645	244.624	-0.662056	0.521112	0.698574	328.63	215.309
ADGRE5	18474.1	60926.3	17161.8	13780.7	28510.7	-0.927333	0.0463441	0.147929	39700.2	19817.8
ADGRF3	79.0106	28.834	39.7613	82.9934	100.256	0.499785	0.232206	0.42582	53.9223	74.3368
ADGRG1	658.422	1141.49	2682.28	1389.9	763.949	0.577831	0.339386	0.538369	899.955	1612.04
ADGRG2	46.6881	62.7564	37.612	41.9737	28.0716	-0.590509	0.148788	0.319306	54.7222	35.8858
ADGRG3	13593.4	38067.7	22835.9	10155.7	14325.5	-0.581841	0.136428	0.30263	25830.5	15772.4
ADGRG5	252.595	312.086	581.375	417.829	363.928	0.585456	0.225335	0.417764	282.34	454.377
ADGRG6	2.39426	8.48059	3.22389	18.125	6.01534	0.663325	0.421789	0.616331	5.43743	9.12141
ADGRL1	441.741	498.659	542.688	465.526	566.445	0.153342	0.624217	0.774296	470.2	524.886
ADGRL2	80.2078	0	7.52241	2.86184	0	-2.88528	0.186997	NA	40.1039	3.46142
ADGRV1	86.1934	33.9224	48.3583	12.4013	29.0742	-1.10843	0.0564602	0.16954	60.0579	29.9446
ADH1A	0	0	3.22389	0	4.01023	2.6532	0.415977	NA	0	2.41137
ADH4	3.59139	0	1.07463	1.90789	1.00256	-0.0995806	0.95857	NA	1.7957	1.32836
ADH5	1359.94	1138.1	1424.96	2222.7	1177	0.332089	0.0346157	0.122046	1249.02	1608.22
ADH6	10.7742	1.69612	48.3583	11.4474	24.0614	2.04204	0.00168433	0.015621	6.23515	27.9557
ADHFE1	389.068	493.57	416.956	521.809	444.133	0.0105007	0.973534	0.986914	441.319	460.966
ADI1	1343.18	1380.64	1172.42	1171.45	1061.71	-0.261754	0.0457653	0.146527	1361.91	1135.19
ADIPOR1	24465.8	34834.9	22437.2	12302.1	11562.5	-0.944722	9.30596e-05	0.00201809	29650.3	15433.9
ADIPOR2	3420.2	2886.79	3698.88	4922.37	2731.97	0.248478	0.172176	0.35242	3153.5	3784.4
ADIRF	8.37992	3.39224	3.22389	6.67763	6.01534	-0.0306147	0.969397	NA	5.88608	5.30562
ADK	770.952	558.023	272.956	317.664	489.248	-0.873537	0.0429292	0.140605	664.488	359.956
ADM	2181.17	3809.48	3223.89	924.375	6379.27	-0.0456098	0.926316	0.962235	2995.33	3509.18
ADM2	40.7025	91.5904	31.1643	20.0329	61.156	-0.764752	0.150311	0.321513	66.1464	37.451
ADM5	32.3225	35.6185	32.2389	18.125	25.0639	-0.46169	0.288507	0.486659	33.9705	25.1426
ADNP	4508.4	5860.09	5504.25	5971.71	4580.68	0.0551872	0.682756	0.816639	5184.24	5352.22
ADNP-AS1	324.422	564.807	641.554	169.803	477.217	-0.201008	0.155015	0.328267	444.615	429.525
ADNP2	1283.32	1925.09	2007.41	750.756	1877.79	-0.142649	0.50577	0.686542	1604.21	1545.32
ADO	460.895	483.394	510.449	859.506	692.767	0.516552	0.00237712	0.0196577	472.145	687.574
ADORA1	0	0	0	1.90789	0	0.922448	0.778323	NA	0	0.635965
ADORA2A	52.6738	400.284	84.8958	25.7566	478.22	-0.000322057	0.999636	0.999763	226.479	196.291
ADORA2A-AS1	125.699	858.236	184.836	64.8684	1137.9	0.094472	0.884452	0.942597	491.967	462.536
ADORA2B	34.7168	39.0107	36.5374	167.895	49.1253	0.903257	0.0127216	0.0628625	36.8638	84.5191
ADORA3	435.756	195.054	176.239	607.664	29.0742	-0.473929	0.480605	0.666878	315.405	270.993
ADPGK	7884.3	9233.67	6284.44	6689.08	6322.13	-0.405419	3.09223e-07	2.93836e-05	8558.99	6431.88
ADPGK-AS1	116.122	156.043	162.269	89.671	174.445	0.0281691	0.911716	0.955846	136.082	142.128
ADPRH	373.505	230.672	307.344	1209.6	740.89	1.13388	0.000171138	0.00307362	302.088	752.613
ADPRHL1	40.7025	13.5689	12.8956	11.4474	19.0486	-0.915069	0.227922	0.420988	27.1357	14.4638
ADPRHL2	411.813	437.598	406.21	495.098	555.417	0.194538	0.448181	0.640439	424.706	485.575
ADPRM	642.859	376.538	742.569	864.276	910.322	0.758056	0.0116177	0.0591219	509.699	839.056
ADRA2A	19.1541	49.1874	5.37315	16.2171	15.0384	-1.44037	0.0255987	0.0997421	34.1708	12.2095
ADRA2B	5.98565	6.78447	8.59704	0	3.00767	-1.86208	0.233356	NA	6.38506	3.86824
ADRB1	15.5627	5.08835	6.44778	13.3553	40.1023	1.21708	0.240527	0.434564	10.3255	19.9684
ADRB2	1422.19	883.678	627.584	756.48	574.465	-0.813805	0.00113244	0.0118528	1152.93	652.843
ADRBK1	8496.04	12402	8277.87	8250.69	8996.95	-0.263945	0.280579	0.478219	10449	8508.5
ADRBK2	3779.34	2211.74	3970.76	4912.83	2855.28	0.382264	0.188151	0.373964	2995.54	3912.96
ADRM1	401.039	505.443	333.135	363.454	418.066	-0.268959	0.247376	0.442209	453.241	371.552
ADSL	1268.96	971.876	1069.26	1405.16	1389.54	0.203733	0.146381	0.316364	1120.42	1287.99
ADSS	2797.7	3066.58	2863.89	2723.52	1381.52	-0.329548	0.261291	0.457596	2932.14	2322.98
ADSSL1	26.3369	8.48059	10.7463	41.9737	17.0435	0.29977	0.606305	0.761024	17.4087	23.2545
ADTRP	119.713	127.209	1572.18	269.967	1115.85	2.66111	6.83403e-08	9.92137e-06	123.461	985.999
AEBP1	143.656	35.6185	582.449	118.289	150.384	1.44598	0.0407703	0.136182	89.6371	283.707
AEBP2	1106.15	1175.41	1632.36	1326.94	1445.69	0.356716	0.0279887	0.1058	1140.78	1468.33
AEN	622.508	535.973	948.898	352.96	946.414	0.259575	0.310223	0.508902	579.241	749.424
AES	2088.99	1212.72	3926.7	2383.91	3095.9	0.944891	1.31924e-05	0.000489286	1650.86	3135.5
AFAP1	405.827	695.408	97.7913	133.553	379.969	-1.43878	0.00284956	0.022161	550.618	203.771
AFAP1-AS1	32.3225	39.0107	5.37315	10.4934	16.0409	-1.65049	0.0244132	0.0969868	35.6666	10.6358
AFAP1L1	13.1684	1.69612	0	10.4934	18.046	0.256319	0.843204	NA	7.43228	9.51315
AFAP1L2	56.2652	81.4137	37.612	126.875	37.0946	-0.222206	0.632455	0.780132	68.8394	67.1939
AFF1	8140.49	10807.7	12323.9	11444.5	17778.3	0.555712	0.0151122	0.0704352	9474.08	13848.9
AFF2	167.598	162.827	87.045	95.3947	108.276	-0.763653	0.134517	0.299842	165.213	96.9053
AFF3	911.017	133.993	2873.56	289.046	605.545	0.707243	0.319384	0.51871	522.505	1256.05
AFF4	9841.61	10821.2	14387.1	8980.46	14291.5	0.253827	0.121824	0.281722	10331.4	12553
AFG3L1P	1112.13	868.413	1432.48	1214.37	789.013	0.21173	0.300413	0.49933	990.274	1145.29
AFG3L2	688.35	413.853	745.793	794.638	738.885	0.480164	0.00472149	0.0316766	551.102	759.772
AFMID	250.2	101.767	203.105	469.342	227.58	0.731222	0.0456341	0.146348	175.984	300.009
AFTPH	7155.25	7483.27	5720.25	7033.45	5333.6	-0.283749	0.0598949	0.176806	7319.26	6029.1
AGA	482.444	347.704	634.032	476.02	586.496	0.438059	0.0655019	0.187478	415.074	565.516
AGAP1	61.0537	110.248	356.777	118.289	61.156	0.681865	0.254537	0.45054	85.6507	178.741
AGAP11	9.57705	0	1.07463	3.81579	11.0281	0.575256	0.609721	NA	4.78852	5.30618
AGAP2	2030.33	4513.37	2613.5	1504.37	1413.61	-0.778089	0.00935528	0.0508076	3271.85	1843.83
AGAP3	229.849	227.28	166.568	228.947	212.542	-0.157952	0.66055	0.80043	228.564	202.686
AGAP4	143.656	281.556	162.269	34.3421	165.422	-0.986055	0.0918574	0.23388	212.606	120.678
AGAP5	234.638	123.817	177.314	234.671	153.391	0.0775498	0.744458	0.857128	179.227	188.459
AGAP6	682.365	361.273	516.897	600.033	624.593	0.2041	0.304685	0.503973	521.819	580.508
AGAP7P	397.447	810.744	397.613	235.625	175.448	-1.3652	0.0464401	0.148134	604.096	269.562
AGAP9	46.6881	32.2262	54.8061	64.8684	36.0921	0.384228	0.458797	0.649985	39.4572	51.9222
AGBL2	132.882	76.3253	94.5674	91.5789	108.276	-0.0491615	0.885373	0.942995	104.603	98.1408
AGBL3	43.0967	57.668	39.7613	34.3421	51.1304	-0.280047	0.477965	0.664785	50.3824	41.7446
AGBL4	3.59139	3.39224	0	0	1.00256	-3.27855	0.153458	NA	3.49181	0.334186
AGBL5	555.469	490.178	474.986	483.651	591.509	-0.0164441	0.923809	0.961141	522.823	516.715
AGER	2808.47	3653.44	1894.57	1246.81	1590.06	-1.04033	2.32738e-06	0.000139279	3230.95	1577.15
AGFG1	20606.2	32178.8	26608.9	18715.5	15116.6	-0.344537	0.175468	0.356553	26392.5	20147
AGFG2	181.964	89.8943	121.433	100.164	127.325	-0.198739	0.376646	0.573566	135.929	116.307
AGGF1	1678.38	1300.92	1163.82	2505.06	1368.49	0.101311	0.500765	0.68262	1489.65	1679.13
AGK	823.626	663.182	1116.54	964.44	985.514	0.462372	0.00276246	0.0217542	743.404	1022.16
AGL	1308.46	1175.41	1824.72	1688.49	1239.16	0.35174	0.0636531	0.183865	1241.94	1584.12
AGMAT	65.8422	45.7952	77.3733	70.5921	107.274	0.650796	0.0942034	0.238102	55.8187	85.0797
AGMO	20.3512	15.2651	8.59704	0.953947	3.00767	-2.44221	0.0278679	0.105414	17.8081	4.18622
AGO1	4589.8	5179.94	4342.58	4332.83	3178.11	-0.296687	0.0758724	0.206528	4884.87	3951.17
AGO2	1405.43	2362.69	1391.65	671.579	1047.67	-0.859152	0.00241649	0.0198607	1884.06	1036.97
AGO3	915.805	1009.19	816.719	781.283	817.084	-0.2551	0.130644	0.29461	962.498	805.028
AGO4	33353.3	51204.1	28633.5	26044.7	16202.3	-0.794056	0.00467477	0.0314304	42278.7	23626.8
AGPAT1	2339.19	2271.1	1309.97	1503.42	1377.51	-0.724716	0.00155837	0.0147546	2305.15	1396.97
AGPAT2	93.3762	198.446	107.463	117.335	119.304	-0.260307	0.553524	0.722683	145.911	114.701
AGPAT3	798.486	639.437	953.197	1503.42	1507.85	0.875123	0.000238747	0.00391858	718.961	1321.49
AGPAT4	954.113	1226.29	1412.06	1113.26	1147.93	0.105481	0.776934	0.878906	1090.2	1224.42
AGPAT4-IT1	43.0967	59.3641	59.1046	70.5921	55.1406	0.203789	0.693019	0.823216	51.2304	61.6125
AGPAT5	439.347	162.827	1085.38	800.361	309.79	1.36055	0.000630907	0.00783214	301.087	731.843
AGPAT6	4242.63	8809.64	7291.36	4078.12	4039.3	-0.285855	0.263805	0.460446	6526.13	5136.26
AGPAT9	3420.2	5039.17	2383.53	2657.7	2681.84	-0.682329	0.0300233	0.11097	4229.69	2574.36
AGPS	1727.46	1326.36	1667.83	2561.35	1652.21	0.341108	0.102031	0.250704	1526.91	1960.46
AGRN	20.3512	16.9612	27.9404	27.6645	183.468	2.00871	0.032643	0.116985	18.6562	79.6909
AGRP	3.59139	0	0	9.53947	4.01023	1.17633	0.468259	NA	1.7957	4.51657
AGTPBP1	16570.7	29059.6	16757.8	14336.9	11317.9	-0.622271	0.00353792	0.0258125	22815.1	14137.5
AGTRAP	3147.26	5190.12	2200.84	2436.38	2985.62	-0.659682	0.043652	0.142114	4168.69	2540.95
AHCTF1	12487.3	21508.5	14937.4	7697.4	11590.6	-0.57075	0.0236245	0.095388	16997.9	11408.4
AHCTF1P1	37.1111	78.0214	46.2091	8.58552	45.1151	-1.03525	0.0683668	0.192896	57.5662	33.3032
AHCY	557.863	432.51	426.628	643.914	497.268	0.0645461	0.743357	0.856453	495.187	522.604
AHCYL1	2670.8	3185.31	2509.26	3972.24	1893.83	-0.103261	0.587434	0.747621	2928.05	2791.78
AHCYL2	780.529	612.299	821.017	1015.95	857.186	0.368493	0.0124574	0.0622037	696.414	898.052
AHDC1	43.0967	61.0603	84.8958	70.5921	59.1509	0.451605	0.202694	0.390952	52.0785	71.5462
AHI1	114.925	128.905	261.135	110.658	206.527	0.576876	0.260805	0.457094	121.915	192.773
AHNAK	73385.3	65500.7	64546.6	116889	105480	0.436676	0.0303271	0.111672	69443	95638.5
AHNAK2	19.1541	3.39224	60.1793	3.81579	54.1381	0.861942	0.440055	0.632877	11.2732	39.3777
AHR	6715.9	9720.45	1645.26	8279.31	20520.3	0.296202	0.63066	0.779328	8218.18	10148.3
AHRR	53.8709	37.3146	23.6419	21.9408	52.133	-0.600638	0.332741	0.531538	45.5927	32.5719
AHSA1	1449.73	1287.35	994.033	1293.55	1214.1	-0.235997	0.0240248	0.096339	1368.54	1167.23
AHSA2	4498.82	3904.46	5550.46	5048.29	2718.94	0.0788751	0.747712	0.859352	4201.64	4439.23
AHSP	28.7311	44.0991	35.4628	2.86184	9.02302	-1.513	0.149152	0.319868	36.4151	15.7825
AICDA	37.1111	37.3146	10.7463	4.76973	3.00767	-2.66597	0.000237174	0.00390205	37.2128	6.17457
AIDA	1188.75	797.176	1437.85	1730.46	1414.61	0.631405	0.00323166	0.0241506	992.963	1527.64
AIF1	18711.2	21143.8	9756.56	17286.5	15795.3	-0.497171	0.0337578	0.12002	19927.5	14279.4
AIF1L	3.59139	3.39224	3.22389	12.4013	5.01279	0.893233	0.353503	NA	3.49181	6.87933
AIFM1	714.687	520.708	450.27	956.809	663.693	0.108831	0.586895	0.747198	617.698	690.257
AIFM2	107.742	54.2758	69.8509	98.2565	78.1995	0.0499009	0.882382	0.942044	81.0088	82.1023
AIFM3	37.1111	30.5301	39.7613	64.8684	86.2199	0.904888	0.0323716	0.116438	33.8206	63.6165
AIG1	602.157	866.716	487.882	580.954	777.984	-0.219672	0.482813	0.668376	734.437	615.607
AIM1	10331.2	9349	14015.3	11784.1	10552.9	0.28968	0.0848465	0.222907	9840.12	12117.4
AIM1L	96.9676	147.562	268.657	66.7763	55.1406	-0.111288	0.810528	0.899955	122.265	130.191
AIM2	1019.96	1975.98	2497.44	4285.13	3642.29	1.33604	0.00230859	0.0192534	1497.97	3474.95
AIMP1	1110.94	734.419	1021.97	1429.97	1218.11	0.41088	0.00695401	0.0412698	922.678	1223.35
AIMP2	80.2078	50.8835	34.3882	97.3026	54.1381	-0.189065	0.539466	0.712037	65.5457	61.9429
AIP	426.179	556.327	596.42	618.158	648.655	0.342702	0.245893	0.440763	491.253	621.077
AIRE	1.19713	1.69612	36.5374	0	2.00511	1.39922	0.355791	NA	1.44662	12.8475
AIRN	25.1397	71.237	16.1194	13.3553	23.0588	-1.34883	0.0143699	0.0679653	48.1884	17.5112
AJAP1	0	0	0	0	3.00767	1.94018	0.303883	NA	0	1.00256
AJUBA	64.6451	42.403	84.8958	20.0329	35.0895	-0.522771	0.297217	0.495858	53.524	46.6727
AK1	122.107	186.573	233.195	102.072	287.734	0.298705	0.540914	0.713108	154.34	207.667
AK2	3007.19	2109.97	2542.57	4734.44	3142.01	0.40146	0.00903523	0.049498	2558.58	3473.01
AK3	973.267	702.193	1087.53	1094.18	1034.64	0.375158	0.0663674	0.18885	837.73	1072.11
AK4	31.1254	49.1874	15.0448	180.296	126.322	1.14636	0.0186302	0.0808028	40.1564	107.221
AK5	37.1111	72.9331	49.433	67.7302	159.407	0.651835	0.278694	0.47642	55.0221	92.1899
AK6	122.107	81.4137	105.314	187.928	95.2429	0.311363	0.239622	0.433637	101.761	129.495
AK7	4.78852	3.39224	1.07463	0.953947	0	-2.65251	0.105995	NA	4.09038	0.676192
AK8	5.98565	1.69612	3.22389	2.86184	1.00256	-0.638934	0.65716	NA	3.84089	2.36276
AK9	630.888	619.083	599.643	583.816	641.637	-0.0380589	0.820187	0.906188	624.986	608.365
AKAP1	434.559	203.534	348.18	539.934	394.005	0.472427	0.0396539	0.133448	319.046	427.373
AKAP10	4271.36	5220.65	4075	4073.35	3591.16	-0.266479	0.146414	0.316364	4746.01	3913.17
AKAP11	2387.08	1211.03	3639.77	3194.77	2049.23	0.768742	0.0009177	0.0101626	1799.05	2961.26
AKAP12	9.57705	11.8728	12.8956	41.0197	44.1125	1.56605	0.0805872	0.215801	10.7249	32.6759
AKAP13	26691.2	47710.1	41013.2	42781.7	36702.6	0.150588	0.475114	0.662456	37200.7	40165.8
AKAP14	3.59139	6.78447	4.29852	0.953947	7.0179	-0.455789	0.675567	NA	5.18793	4.09012
AKAP3	28.7311	1.69612	25.7911	26.7105	28.0716	1.06315	0.19714	0.383874	15.2136	26.8577
AKAP5	113.727	86.502	552.36	292.862	205.524	1.71353	0.00170414	0.0157375	100.115	350.249
AKAP6	19.1541	1.69612	10.7463	34.3421	25.0639	1.25874	0.138761	0.305911	10.4251	23.3841
AKAP7	228.652	139.082	121.433	353.914	378.967	0.623005	0.114221	0.270689	183.867	284.771
AKAP8	1519.16	2384.74	2717.74	1443.32	2885.36	0.245822	0.137451	0.304004	1951.95	2348.81
AKAP8L	2585.8	3395.63	3544.13	2814.14	2793.12	0.038234	0.808976	0.898678	2990.72	3050.47
AKAP9	5451.73	4382.77	6937.81	6343.75	6474.51	0.419956	0.0226281	0.0926094	4917.25	6585.36
AKIP1	81.4049	59.3641	46.2091	120.197	60.1534	-0.00668252	0.982156	0.991132	70.3845	75.5199
AKIRIN1	8156.05	11806.7	7291.36	6036.58	7985.37	-0.470947	0.000740527	0.00876281	9981.37	7104.44
AKIRIN2	7183.98	10521	4059.95	3607.83	5404.79	-0.999213	4.36006e-06	0.000214299	8852.5	4357.52
AKNA	16242.7	22682.2	15759.4	10654.6	13622.7	-0.538526	0.0249788	0.0981315	19462.4	13345.6
AKNAD1	1.19713	1.69612	4.29852	0	0	-0.29061	0.872474	NA	1.44662	1.43284
AKR1A1	1189.95	620.779	747.942	1668.45	1676.28	0.579928	0.0530418	0.16224	905.364	1364.22
AKR1B1	563.849	430.814	554.509	649.638	585.493	0.268855	0.0830855	0.219753	497.331	596.547
AKR1C1	41.8996	22.0495	20.418	24.8026	36.0921	-0.379037	0.465621	0.655221	31.9746	27.1042
AKR1C2	9.57705	10.1767	1.07463	2.86184	10.0256	-1.05761	0.246506	NA	9.87688	4.65401
AKR1C3	263.369	300.213	258.986	427.368	199.509	-0.0100924	0.979898	0.989874	281.791	295.288
AKR1C4	63.4479	62.7564	52.6569	24.8026	45.1151	-0.697226	0.202656	0.390925	63.1022	40.8582
AKR1C6P	1.19713	0	0	0.953947	4.01023	1.28077	0.499696	NA	0.598565	1.65473
AKR1C8P	23.9426	11.8728	21.4926	4.76973	4.01023	-1.05068	0.159921	0.335579	17.9077	10.0909
AKR1E2	31.1254	15.2651	21.4926	25.7566	41.1048	0.322361	0.584568	0.745865	23.1952	29.4513
AKR7A2	152.036	94.9826	147.224	178.388	116.297	0.25525	0.238325	0.432288	123.509	147.303
AKR7A2P1	5.98565	1.69612	8.59704	4.76973	27.069	1.57009	0.117892	0.275639	3.84089	13.4786
AKR7A3	10.7742	3.39224	4.29852	2.86184	1.00256	-1.34175	0.161174	NA	7.08321	2.72097
AKR7L	13.1684	11.8728	23.6419	14.3092	24.0614	0.670554	0.255003	0.450958	12.5206	20.6708
AKT1	3442.95	3667.01	2662.93	2038.58	1803.6	-0.690649	0.07055	0.197316	3554.98	2168.37
AKT1S1	266.96	446.079	458.867	279.506	310.793	-0.0135035	0.961413	0.980604	356.52	349.722
AKT2	2450.53	3030.96	2906.87	1857.33	2982.61	-0.0949073	0.705184	0.831774	2740.75	2582.27
AKT3	773.347	741.204	1277.73	970.164	1296.31	0.618962	0.0192688	0.082681	757.275	1181.4
AKTIP	2794.1	3161.56	1990.21	1832.53	1058.7	-0.862682	0.000366513	0.00535061	2977.83	1627.15
ALAD	1392.26	1407.78	1143.41	1761.94	980.501	-0.14525	0.286058	0.48383	1400.02	1295.28
ALAS1	4540.72	1857.25	1034.87	2500.29	2530.45	-0.793388	0.0304747	0.112057	3198.98	2021.87
ALAS2	138.867	625.868	146.15	64.8684	80.2046	-1.57581	0.221281	0.412786	382.367	97.0742
ALB	9.57705	1.69612	8.59704	3.81579	11.0281	0.574694	0.543693	NA	5.63658	7.81365
ALCAM	1375.5	1429.83	1646.33	1506.28	1074.74	0.00841367	0.982222	0.991135	1402.67	1409.12
ALDH16A1	250.2	227.28	263.284	166.941	318.813	0.0461976	0.869613	0.93518	238.74	249.679
ALDH18A1	480.05	237.457	428.777	449.309	551.406	0.481375	0.192174	0.378728	358.753	476.498
ALDH1A1	893.06	252.722	399.762	1806.78	451.151	0.386471	0.490587	0.674499	572.891	885.896
ALDH1A2	81.4049	127.209	46.2091	20.0329	38.0972	-1.61922	0.00412384	0.0286344	104.307	34.7797
ALDH1A3	22.7455	22.0495	9.67167	16.2171	3.00767	-1.30544	0.0396141	0.133375	22.3975	9.63215
ALDH1B1	39.5053	30.5301	16.1194	76.3158	24.0614	-0.10239	0.872393	0.936151	35.0177	38.8322
ALDH1L2	114.925	23.7457	40.8359	138.322	114.292	0.554416	0.458633	0.649879	69.3351	97.8166
ALDH2	2679.18	2925.8	1359.41	4414.87	1484.79	-0.412607	0.154072	0.326932	2802.49	2419.69
ALDH3A2	870.314	508.835	872.599	1624.57	873.227	0.674837	6.35877e-05	0.00151875	689.575	1123.47
ALDH3B1	1169.6	1251.74	726.45	1074.14	541.381	-0.656032	0.00254425	0.0204781	1210.67	780.658
ALDH4A1	98.1647	101.767	36.5374	64.8684	122.312	-0.407163	0.396406	0.59255	99.9659	74.5726
ALDH5A1	263.369	125.513	422.33	213.684	192.491	0.498476	0.0983459	0.244577	194.441	276.168
ALDH6A1	153.233	139.082	156.896	207.006	158.404	0.24703	0.269163	0.466269	146.157	174.102
ALDH7A1	46.6881	0	49.433	47.6973	23.0588	1.32268	0.13255	0.297064	23.3441	40.063
ALDH8A1	51.4766	55.9719	50.5076	63.9144	54.1381	0.0643266	0.869769	0.935213	53.7243	56.1867
ALDH9A1	1989.63	2221.91	1710.81	2423.98	1698.33	-0.130739	0.378162	0.574757	2105.77	1944.37
ALDOA	12948.2	20448.4	9924.21	10937	9470.16	-0.685829	0.00771684	0.0443132	16698.3	10110.5
ALDOB	34.7168	22.0495	25.7911	12.4013	11.0281	-0.836766	0.243566	0.437797	28.3832	16.4069
ALDOC	367.519	383.323	181.612	177.434	225.575	-0.935039	0.000229787	0.00382061	375.421	194.874
ALG1	90.982	39.0107	87.045	140.23	84.2148	0.699758	0.0758375	0.206528	64.9963	103.83
ALG10	263.369	206.926	465.315	403.52	372.951	0.821749	0.00208705	0.0179636	235.148	413.929
ALG10B	849.963	496.963	1460.42	810.855	992.532	0.678596	0.00127138	0.0129038	673.463	1087.94
ALG11	162.81	179.789	270.807	352.006	491.253	1.11778	3.38119e-05	0.000956926	171.299	371.355
ALG12	187.95	228.976	247.165	166.941	215.55	0.0102847	0.974285	0.987129	208.463	209.885
ALG13	1872.31	1562.12	2497.44	2550.85	1808.61	0.412544	0.0292949	0.109179	1717.22	2285.64
ALG14	106.545	61.0603	55.8808	111.612	101.258	0.0894124	0.829782	0.911422	83.8025	89.5836
ALG1L	0	0	9.67167	1.90789	0	3.58148	0.10463	NA	0	3.85985
ALG1L2	4.78852	16.9612	10.7463	1.90789	5.01279	-0.960056	0.312668	NA	10.8749	5.88899
ALG1L9P	22.7455	6.78447	19.3433	6.67763	15.0384	-0.0322621	0.959485	0.979962	14.765	13.6864
ALG2	395.053	332.439	509.375	678.256	411.048	0.537644	0.0103321	0.0544708	363.746	532.893
ALG3	164.007	156.043	125.732	296.677	191.488	0.282681	0.189743	0.375866	160.025	204.633
ALG5	464.487	252.722	329.911	352.96	398.015	0.0209764	0.951356	0.976109	358.604	360.296
ALG6	1295.3	1346.72	1058.51	1230.59	804.051	-0.358958	0.0529862	0.162133	1321.01	1031.05
ALG8	359.139	173.004	242.866	478.881	385.985	0.475389	0.0313746	0.114206	266.072	369.244
ALG9	453.713	208.623	517.972	381.579	567.447	0.607026	0.015219	0.0707857	331.168	488.999
ALK	13.1684	0	13.9702	24.8026	17.0435	1.44801	0.0583348	0.173261	6.58422	18.6054
ALKBH1	235.835	232.368	225.672	385.395	232.593	0.234543	0.320199	0.519495	234.101	281.22
ALKBH2	95.7705	94.9826	108.538	104.934	123.315	0.244341	0.288817	0.487078	95.3765	112.262
ALKBH3	269.354	193.357	203.105	333.881	222.568	0.121276	0.47495	0.662404	231.356	253.185
ALKBH3-AS1	9.57705	5.08835	13.9702	14.3092	16.0409	1.02659	0.107186	0.259348	7.3327	14.7734
ALKBH4	336.394	729.331	381.494	306.217	341.872	-0.56198	0.198283	0.385431	532.862	343.194
ALKBH5	1965.69	2450.89	2110.57	1375.59	1670.26	-0.375121	0.0135601	0.0654985	2208.29	1718.81
ALKBH6	682.365	673.359	783.405	629.605	716.828	0.056437	0.690547	0.822086	677.862	709.946
ALKBH7	25.1397	40.7068	44.0598	9.53947	25.0639	-0.444244	0.409616	0.605369	32.9233	26.2211
ALKBH8	287.311	145.866	413.732	471.25	581.483	1.21395	1.64972e-08	3.11637e-06	216.589	488.822
ALMS1	634.479	334.135	1120.84	682.072	950.424	0.930375	7.24194e-06	0.0003128	484.307	917.778
ALMS1-IT1	77.8135	72.9331	97.7913	30.5263	90.2302	-0.158832	0.692858	0.823148	75.3733	72.8493
ALMS1P	8.37992	1.69612	12.8956	20.0329	56.1432	2.36217	0.0447001	0.144179	5.03802	29.6906
ALOX12	1187.55	1390.82	707.106	1237.27	971.478	-0.424553	0.250837	0.446254	1289.19	971.951
ALOX12-AS1	183.161	201.838	155.821	158.355	199.509	-0.166243	0.476104	0.663187	192.5	171.228
ALOX12B	11.9713	3.39224	8.59704	4.76973	4.01023	-0.355253	0.648676	NA	7.68177	5.79233
ALOX12P2	40.7025	39.0107	82.7465	54.375	45.1151	0.587224	0.251785	0.447421	39.8566	60.7455
ALOX15	0	23.7457	2.14926	0	0	-4.60145	0.0112747	0.0578942	11.8728	0.71642
ALOX15B	1112.13	1219.51	1150.93	928.19	27.069	-0.712164	0.401429	0.598062	1165.82	702.063
ALOX15P1	31.1254	6.78447	41.9106	19.0789	29.0742	0.704276	0.192054	0.378692	18.9549	30.0212
ALOX5	24841.7	47683	22611.3	16583.4	19322.3	-0.818663	9.78684e-05	0.00207723	36262.3	19505.7
ALOX5AP	45554.4	68441.8	38099.9	38977.3	20893.3	-0.752865	0.0680767	0.19226	56998.1	32656.8
ALOXE3	4.78852	1.69612	2.14926	2.86184	8.02046	0.578563	0.6884	NA	3.24232	4.34385
ALPK1	16553.9	28584.7	14126	12663.6	17047.5	-0.575256	0.0473923	0.150437	22569.3	14612.4
ALPK2	13.1684	3.39224	32.2389	8.58552	4.01023	0.503497	0.590469	0.749693	8.28034	14.9449
ALPK3	380.688	239.153	243.941	81.0855	214.547	-1.02609	0.0142383	0.0675488	309.92	179.858
ALPL	6288.53	29392	5417.21	5087.4	11373	-0.931095	0.087874	0.227506	17840.3	7292.54
ALS2	1206.71	1029.54	1035.94	832.796	848.163	-0.31239	0.117324	0.275006	1118.13	905.634
ALS2CL	102.953	47.4913	135.403	151.678	325.831	1.58649	0.00772446	0.0443146	75.2223	204.304
ALS2CR11	22.7455	6.78447	9.67167	31.4802	20.0511	0.583627	0.34861	0.547462	14.765	20.401
ALS2CR12	155.627	128.905	175.165	133.553	178.455	0.179238	0.500252	0.682291	142.266	162.391
ALX3	167.598	186.573	161.194	143.092	212.542	-0.0405597	0.86857	0.934618	177.086	172.276
ALX4	2.39426	1.69612	5.37315	1.90789	2.00511	0.517674	0.760526	NA	2.04519	3.09539
ALYREF	317.24	744.596	554.509	246.118	487.243	-0.312888	0.336698	0.535461	530.918	429.29
AMACR	0	3.39224	0	2.86184	2.00511	-0.200611	0.928453	NA	1.69612	1.62232
AMBN	5.98565	0	26.8657	3.81579	7.0179	1.88185	0.238149	NA	2.99283	12.5665
AMBRA1	519.555	561.415	659.823	727.862	1136.9	0.641056	0.00543693	0.034909	540.485	841.528
AMD1	9888.3	5107.01	4765.98	8067.53	6499.58	-0.222464	0.301326	0.500357	7497.66	6444.36
AMDHD1	52.6738	100.071	50.5076	78.2236	33.0844	-0.482908	0.3675	0.56537	76.3724	53.9385
AMDHD2	53.8709	100.071	56.9554	20.0329	37.0946	-1.08941	0.143884	0.312826	76.9709	38.0276
AMER1	216.681	188.269	293.374	346.283	387.99	0.767135	0.000112741	0.00229269	202.475	342.549
AMFR	1193.54	965.091	1444.3	1891.68	1110.83	0.446888	0.0200588	0.0852076	1079.32	1482.27
AMH	1.19713	0	4.29852	0	4.01023	2.0311	0.401081	NA	0.598565	2.76958
AMHR2	8.37992	16.9612	2.14926	2.86184	4.01023	-1.97802	0.0753098	NA	12.6705	3.00711
AMICA1	51057.6	71944.2	24185.6	30162.8	34438.8	-1.02029	0.00219714	0.0185609	61500.9	29595.8
AMIGO1	93.3762	61.0603	84.8958	163.125	143.366	0.756539	0.0903813	0.231458	77.2182	130.462
AMIGO2	739.827	417.245	339.583	675.394	886.261	0.13412	0.759079	0.866321	578.536	633.746
AMIGO3	47.8852	54.2758	68.7763	30.5263	60.1534	0.0480771	0.927286	0.962795	51.0805	53.152
AMMECR1	1139.67	983.749	1320.72	751.71	1460.73	0.105032	0.526333	0.702235	1061.71	1177.72
AMMECR1L	1283.32	1580.78	1270.21	1677.99	1241.17	-0.040512	0.762007	0.868152	1432.05	1396.46
AMN1	3314.86	2669.69	1560.36	1937.47	1293.3	-0.913126	0.00535061	0.034552	2992.27	1597.04
AMOT	94.5733	120.424	109.612	89.671	80.2046	-0.261944	0.430498	0.623997	107.499	93.1626
AMOTL1	70.6307	74.6292	64.4778	159.309	72.1841	0.389706	0.386133	0.582077	72.63	98.657
AMPD1	13.1684	10.1767	1.07463	2.86184	9.02302	-1.41808	0.249685	NA	11.6726	4.31983
AMPD2	5174	18855.7	17299.4	1898.35	8344.28	-0.688154	0.228633	0.421586	12014.9	9180.68
AMPD3	3047.9	2679.87	1753.8	2327.63	2989.63	-0.301009	0.320624	0.51997	2863.88	2357.02
AMPH	629.691	1394.21	867.226	963.486	47.1202	-0.661068	0.355027	0.553877	1011.95	625.944
AMT	673.985	722.546	553.434	729.769	622.588	-0.14333	0.560891	0.728299	698.266	635.264
AMY2B	4087.01	3619.52	2573.74	2360.06	1911.88	-0.752127	0.000799599	0.00925311	3853.26	2281.89
AMZ1	3.59139	0	10.7463	2.86184	8.02046	1.678	0.117532	NA	1.7957	7.20953
AMZ2	2903.04	2578.1	2645.74	2197.89	1536.92	-0.366961	0.0764776	0.207779	2740.57	2126.85
AMZ2P1	802.078	747.988	957.495	494.145	536.368	-0.286993	0.256245	0.452191	775.033	662.669
ANAPC1	1142.06	519.012	1338.99	1233.45	1310.34	0.701197	0.000457755	0.00619787	830.538	1294.26
ANAPC10	94.5733	88.1981	65.5524	125.921	77.1969	-0.07147	0.768238	0.872629	91.3857	89.5568
ANAPC11	125.699	142.474	123.582	124.013	138.353	-0.0506294	0.871207	0.93568	134.086	128.649
ANAPC13	1373.11	1801.28	1008	1374.64	951.427	-0.510018	0.0442521	0.143383	1587.19	1111.36
ANAPC15	169.993	274.771	232.12	151.678	149.381	-0.308338	0.159265	0.3346	222.382	177.726
ANAPC16	4381.5	3929.91	4827.24	4400.56	2747.01	-0.059695	0.765257	0.870658	4155.7	3991.6
ANAPC1P1	11.9713	23.7457	26.8657	15.2632	16.0409	-0.0388043	0.96196	0.980709	17.8585	19.3899
ANAPC2	289.706	306.997	336.359	249.934	361.923	0.0896595	0.826243	0.909811	298.352	316.072
ANAPC4	3887.08	2545.87	2790.81	2552.76	2734.98	-0.248878	0.123503	0.284138	3216.48	2692.85
ANAPC5	4149.26	3336.26	3950.34	3591.61	3767.61	0.0145074	0.902511	0.951612	3742.76	3769.85
ANAPC7	1575.42	1328.06	1442.15	1645.56	1274.25	0.0015744	0.990708	0.995541	1451.74	1453.99
ANG	104.15	27.1379	13.9702	100.164	21.0537	-0.921441	0.062754	0.182039	65.6441	45.0628
ANGEL1	477.655	239.153	554.509	611.48	341.872	0.535996	0.0079979	0.0453687	358.404	502.62
ANGEL2	2361.94	1982.76	2640.37	2379.14	2080.31	0.123382	0.275311	0.473155	2172.35	2366.61
ANGPT1	307.663	907.423	63.4032	107.796	45.1151	-3.27964	3.96782e-06	0.000199301	607.543	72.1047
ANGPT2	13.1684	13.5689	13.9702	18.125	26.0665	0.562286	0.279804	0.47758	13.3687	19.3872
ANGPT4	41.8996	25.4418	15.0448	12.4013	20.0511	-1.08399	0.0311468	0.113748	33.6707	15.8324
ANGPTL1	81.4049	137.386	297.672	30.5263	103.263	-0.114404	0.787762	0.885181	109.395	143.821
ANGPTL2	4.78852	6.78447	7.52241	0	2.00511	-1.18556	0.243176	NA	5.7865	3.17584
ANGPTL3	5.98565	0	4.29852	0.953947	5.01279	0.0892419	0.940078	NA	2.99283	3.42175
ANGPTL4	8.37992	3.39224	3.22389	11.4474	6.01534	0.031779	0.977957	NA	5.88608	6.89553
ANGPTL6	14.3656	11.8728	30.0896	7.63158	13.0332	0.121082	0.843233	0.919821	13.1192	16.9182
ANGPTL7	0	6.78447	7.52241	1.90789	4.01023	0.648012	0.544812	NA	3.39224	4.48018
ANK1	201.118	259.506	104.239	245.164	203.519	-0.37026	0.471344	0.659498	230.312	184.308
ANK2	0	3.39224	3.22389	1.90789	6.01534	1.79214	0.46357	0.653653	1.69612	3.71571
ANK3	247.806	184.877	228.896	253.75	525.34	0.650828	0.109324	0.262978	216.341	335.995
ANKAR	205.907	164.523	248.239	171.71	139.355	-0.00512232	0.980155	0.990005	185.215	186.435
ANKDD1A	1337.2	1767.36	931.704	1419.47	909.319	-0.521804	0.195842	0.382306	1552.28	1086.83
ANKDD1B	43.0967	47.4913	30.0896	58.1908	47.1202	0.0550191	0.922249	0.960405	45.294	45.1335
ANKEF1	52.6738	32.2262	35.4628	86.8092	64.1637	0.545705	0.207353	0.396475	42.45	62.1452
ANKFY1	4133.69	4077.47	5099.12	5369.77	8469.6	0.612899	0.00645551	0.0391248	4105.58	6312.83
ANKH	1189.95	848.059	1588.3	1270.66	1283.27	0.445109	0.00438546	0.0299345	1019	1380.74
ANKHD1	803.275	922.688	629.733	433.092	630.609	-0.628937	0.000151231	0.00280277	862.982	564.478
ANKHD1-EIF4EBP3	136.473	113.64	67.7017	45.7895	92.2353	-0.930257	0.00449486	0.0305351	125.056	68.5755
ANKIB1	2115.33	1672.37	2372.78	2988.72	2537.47	0.471065	0.000663302	0.0081632	1893.85	2632.99
ANKK1	7.18279	5.08835	13.9702	11.4474	28.0716	1.56293	0.0760882	0.206864	6.13557	17.8297
ANKLE1	94.5733	59.3641	54.8061	92.5329	146.373	0.306294	0.426735	0.620723	76.9687	97.9041
ANKLE2	3281.34	3580.51	4131.95	3018.29	2855.28	-0.051153	0.676114	0.812258	3430.92	3335.17
ANKMY1	160.416	118.728	233.195	218.454	226.578	0.704309	0.00812606	0.045766	139.572	226.075
ANKMY2	658.422	466.433	571.703	625.789	671.713	0.154749	0.272579	0.470213	562.427	623.069
ANKRA2	1169.6	1782.62	2004.18	1423.29	1448.7	0.146088	0.487032	0.671785	1476.11	1625.39
ANKRD1	2.39426	0	0	0	5.01279	0.443356	0.902409	NA	1.19713	1.67093
ANKRD10	5493.63	6116.2	6115.72	3245.33	5805.81	-0.252204	0.224503	0.416764	5804.92	5055.62
ANKRD11	3444.15	5146.02	4586.52	3293.98	3747.56	-0.146522	0.431537	0.624753	4295.08	3876.02
ANKRD12	10407.9	12517.4	12569.9	8230.65	10376.5	-0.154167	0.350486	0.549143	11462.6	10392.4
ANKRD13A	19770.6	30906.7	19152.1	13843.7	16888.1	-0.580841	0.000615521	0.00769597	25338.6	16627.9
ANKRD13B	14.3656	30.5301	31.1643	11.4474	24.0614	-0.0999923	0.882981	0.942107	22.4478	22.2243
ANKRD13C	683.562	471.521	827.465	1055.07	707.805	0.58307	0.00116077	0.0120929	577.541	863.445
ANKRD13D	2722.28	4438.74	2391.05	1491.97	2736.98	-0.677641	0.0781392	0.211341	3580.51	2206.67
ANKRD16	43.0967	23.7457	56.9554	62.0066	37.0946	0.672577	0.122795	0.282925	33.4212	52.0189
ANKRD17	4357.56	4489.62	5623.54	6199.7	5636.38	0.396997	0.00505496	0.0332453	4423.59	5819.87
ANKRD18A	56.2652	128.905	39.7613	29.5724	88.225	-0.812409	0.247574	0.442361	92.5851	52.5196
ANKRD18DP	26.3369	20.3534	67.7017	22.8947	4.01023	0.295374	0.748053	0.859466	23.3451	31.5355
ANKRD19P	93.3762	101.767	62.3285	90.625	99.2532	-0.230544	0.530264	0.705893	97.5717	84.0689
ANKRD2	16.7598	44.0991	13.9702	12.4013	24.0614	-0.740479	0.2007	0.388396	30.4295	16.811
ANKRD20A11P	5.98565	3.39224	33.3135	2.86184	24.0614	1.65532	0.083766	0.220808	4.68895	20.0789
ANKRD20A12P	4.78852	3.39224	2.14926	0	0	-2.84158	0.111835	NA	4.09038	0.71642
ANKRD20A4	39.5053	0	47.2837	18.125	20.0511	2.4093	0.244453	0.439036	19.7527	28.4866
ANKRD20A5P	52.6738	72.9331	262.21	101.118	85.2174	1.15371	0.00352981	0.0257653	62.8034	149.515
ANKRD20A8P	2.39426	8.48059	0	0.953947	0	-3.943	0.0456095	NA	5.43743	0.317982
ANKRD20A9P	1.19713	3.39224	7.52241	2.86184	3.00767	1.11948	0.447298	NA	2.29468	4.46397
ANKRD22	913.411	1458.66	855.405	1768.62	2852.28	0.543556	0.216629	0.407209	1186.04	1825.43
ANKRD23	73.025	66.1486	85.9704	63.9144	101.258	0.262268	0.304639	0.503973	69.5868	83.7144
ANKRD24	32.3225	1.69612	27.9404	26.7105	35.0895	1.01616	0.178692	0.360673	17.0093	29.9135
ANKRD26	344.774	342.616	461.016	553.289	485.238	0.540167	0.0262601	0.101237	343.695	499.848
ANKRD26P1	16.7598	5.08835	3.22389	0	0	-3.53126	0.0132271	NA	10.9241	1.07463
ANKRD27	957.705	1253.43	1478.69	1405.16	916.337	0.210284	0.309103	0.507798	1105.57	1266.73
ANKRD28	2525.95	3670.4	2199.77	2698.72	3044.77	-0.225821	0.443502	0.636317	3098.17	2647.75
ANKRD29	1.19713	6.78447	1.07463	1.90789	4.01023	-0.675788	0.596923	NA	3.9908	2.33092
ANKRD30B	0	0	5.37315	2.86184	0	3.40636	0.198167	NA	0	2.745
ANKRD30BL	1.19713	0	19.3433	4.76973	0	3.35286	0.278477	NA	0.598565	8.03769
ANKRD31	17.957	5.08835	5.37315	20.0329	28.0716	0.747828	0.322087	0.521157	11.5227	17.8259
ANKRD32	1193.54	1730.04	1368	1324.08	889.268	-0.244975	0.345064	0.544182	1461.79	1193.78
ANKRD33B	926.579	1131.31	541.613	865.23	1634.17	-0.0364853	0.92838	0.963022	1028.95	1013.67
ANKRD34A	122.107	103.463	99.9406	114.474	49.1253	-0.352124	0.435791	0.628486	112.785	87.8465
ANKRD34B	177.175	291.732	10.7463	703.059	349.892	-0.0982386	0.936929	0.96803	234.454	354.566
ANKRD35	10.7742	1.69612	2.14926	22.8947	3.00767	-0.106772	0.92	NA	6.23515	9.35055
ANKRD36	650.042	561.415	1661.38	580.954	1084.77	0.748117	0.000294846	0.00458619	605.729	1109.03
ANKRD36B	223.863	149.258	557.733	331.02	376.962	1.16812	0.00117725	0.0122158	186.561	421.905
ANKRD36BP1	933.762	876.893	1617.32	961.579	2863.3	0.926613	0.00103528	0.0110611	905.328	1814.07
ANKRD36BP2	292.1	67.8447	1057.44	159.309	351.898	1.26577	0.081499	0.217169	179.972	522.881
ANKRD36C	173.584	98.3749	384.717	162.171	337.862	1.04991	6.30875e-05	0.0015171	135.979	294.917
ANKRD37	8.37992	10.1767	29.015	10.4934	16.0409	0.915628	0.147725	0.318099	9.27831	18.5164
ANKRD39	25.1397	22.0495	32.2389	18.125	43.11	0.398249	0.394534	0.590821	23.5946	31.1579
ANKRD40	863.131	549.542	847.883	1526.32	1009.58	0.650639	1.86026e-06	0.000116987	706.337	1127.92
ANKRD42	596.171	873.501	587.823	465.526	1078.75	-0.0604479	0.865001	0.933082	734.836	710.7
ANKRD44	19395.9	21252.4	18794.2	12785.8	13574.6	-0.444408	0.000704246	0.0084794	20324.1	15051.5
ANKRD44-IT1	536.315	374.842	320.24	115.428	229.586	-1.18839	0.000100809	0.00213018	455.578	221.751
ANKRD45	25.1397	11.8728	34.3882	31.4802	57.1458	1.01911	0.4047	0.600937	18.5063	41.0047
ANKRD46	210.695	128.905	182.687	214.638	177.453	0.211634	0.445414	0.638068	169.8	191.593
ANKRD49	1788.51	2250.75	2952.01	1998.52	2434.21	0.277391	0.0280889	0.105969	2019.63	2461.58
ANKRD50	885.877	581.769	653.375	1819.18	716.828	0.384154	0.143843	0.312826	733.823	1063.13
ANKRD52	2561.86	2159.16	3834.28	2425.89	3129.98	0.38622	0.00647607	0.0392343	2360.51	3130.05
ANKRD53	5.98565	3.39224	18.2687	21.9408	10.0256	1.78522	0.0177162	0.0781798	4.68895	16.745
ANKRD54	199.921	189.965	168.717	144.046	203.519	-0.185207	0.532823	0.70755	194.943	172.094
ANKRD55	404.63	637.74	655.524	317.664	256.655	-0.357009	0.388266	0.583944	521.185	409.948
ANKRD6	463.29	693.712	289.075	384.441	211.54	-0.96037	0.00282141	0.0220492	578.501	295.019
ANKRD61	102.953	94.9826	185.911	127.829	168.43	0.677285	0.0242584	0.0968066	98.9679	160.723
ANKRD62	9.57705	6.78447	12.8956	0.953947	3.00767	-1.0599	0.288451	NA	8.18076	5.61906
ANKRD62P1-PARP4P3	7.18279	8.48059	6.44778	3.81579	10.0256	-0.24525	0.784219	NA	7.83169	6.76305
ANKRD7	1.19713	1.69612	0	0	2.00511	-1.01464	0.654771	NA	1.44662	0.668372
ANKRD9	40.7025	59.3641	66.6271	36.25	28.0716	-0.228456	0.605651	0.760488	50.0333	43.6495
ANKS1A	1365.93	3148	1766.69	1645.56	929.371	-0.573127	0.0427138	0.140136	2256.96	1447.21
ANKS1B	4.78852	0	3.22389	2.86184	0	-0.250264	0.867891	NA	2.39426	2.02858
ANKS3	71.8279	54.2758	89.1943	45.7895	66.1688	0.0676077	0.834232	0.914168	63.0518	67.0508
ANKS6	177.175	135.689	413.732	135.46	263.673	0.655506	0.0127305	0.0628665	156.432	270.955
ANKUB1	38.3082	59.3641	19.3433	10.4934	6.01534	-2.32324	0.00436165	0.029785	48.8362	11.9507
ANKZF1	5541.52	4046.94	4114.76	2971.54	1781.54	-0.698603	0.00568497	0.0358402	4794.23	2955.95
ANLN	102.953	130.601	47.2837	168.849	146.373	-0.0349244	0.956921	0.978642	116.777	120.835
ANO10	1231.85	1636.75	733.972	1207.7	639.632	-0.752392	0.015909	0.0728709	1434.3	860.434
ANO2	29.9283	10.1767	4.29852	10.4934	16.0409	-0.956079	0.380866	0.577412	20.0525	10.2776
ANO5	38.3082	20.3534	32.2389	225.131	99.2532	1.654	0.0017125	0.0157652	29.3308	118.875
ANO6	4497.62	3504.18	3148.67	5858.19	4061.36	0.0912361	0.698128	0.826858	4000.9	4356.07
ANO7	3.59139	23.7457	15.0448	10.4934	17.0435	0.218325	0.828472	0.91057	13.6685	14.1939
ANO8	113.727	84.8059	144	210.822	176.45	0.84832	0.0114415	0.058491	99.2667	177.091
ANO9	259.777	281.556	283.702	162.171	499.274	0.159555	0.706579	0.832841	270.667	315.049
ANOS1	96.9676	74.6292	13.9702	13.3553	13.0332	-2.81055	0.000365309	0.00534873	85.7984	13.4529
ANP32A	41411.2	64817.2	24019.1	28870.3	29115.3	-0.91971	0.0001392	0.00264437	53114.2	27334.9
ANP32A-IT1	1084.6	1438.31	1306.75	535.164	651.662	-0.670469	0.00423138	0.0291493	1261.45	831.192
ANP32AP1	11.9713	28.834	5.37315	12.4013	6.01534	-1.34745	0.0686465	NA	20.4027	7.92993
ANP32B	4069.05	3616.12	3463.53	4536.02	3783.65	0.0264754	0.893387	0.947663	3842.59	3927.73
ANP32C	1.19713	16.9612	3.22389	0	5.01279	-1.71891	0.153283	NA	9.07916	2.74556
ANP32E	3724.27	2583.19	2744.6	4847	4035.29	0.271838	0.200507	0.388118	3153.73	3875.63
ANPEP	10428.2	35632.1	14554.8	8479.63	12695.4	-0.74281	0.128856	0.292082	23030.1	11909.9
ANTXR1	8.37992	5.08835	10.7463	9.53947	1.00256	0.0817413	0.950306	NA	6.73414	7.09611
ANTXR2	5995.23	6870.97	4649.92	5943.09	5008.78	-0.306537	0.206069	0.394982	6433.1	5200.6
ANTXRL	5.98565	13.5689	15.0448	1.90789	2.00511	-0.956312	0.477603	0.664448	9.7773	6.31928
ANTXRLP1	20.3512	11.8728	109.612	50.5592	89.2276	2.3812	2.66129e-06	0.000150849	16.112	83.133
ANXA1	27893.2	49080.6	14935.2	35022.3	35305.1	-0.451713	0.1326	0.297089	38486.9	28420.8
ANXA10	11.9713	11.8728	2.14926	11.4474	74.1892	1.2101	0.203226	0.391495	11.9221	29.262
ANXA11	15489.7	25105.9	13485.5	9185.56	8724.25	-0.923657	0.000149729	0.00278483	20297.8	10465.1
ANXA2	14298.5	9097.98	5347.36	19679.9	14966.2	0.055455	0.836414	0.915602	11698.3	13331.2
ANXA2P2	10.7742	20.3534	6.44778	31.4802	13.0332	-0.124316	0.841883	0.919366	15.5638	16.9871
ANXA2R	355.548	200.142	355.702	410.197	639.632	0.772686	0.0139746	0.0668217	277.845	468.51
ANXA3	7344.4	25012.7	8937.7	10531.6	17048.5	-0.160812	0.700582	0.82845	16178.5	12172.6
ANXA4	1194.74	1300.92	1124.06	1722.83	1911.88	0.334156	0.10495	0.25547	1247.83	1586.26
ANXA5	7163.63	6287.51	4278.1	8378.52	9172.4	0.0755366	0.781732	0.881592	6725.57	7276.34
ANXA6	6773.37	4735.56	4905.69	8674.24	7330.7	0.265745	0.212227	0.402261	5754.46	6970.21
ANXA7	4600.57	5851.61	4625.21	4476.87	4772.17	-0.162724	0.181978	0.365519	5226.09	4624.75
ANXA8	4.78852	1.69612	3.22389	10.4934	0	0.29286	0.876014	NA	3.24232	4.57244
ANXA8L1	3.59139	6.78447	5.37315	18.125	8.02046	0.842815	0.512115	NA	5.18793	10.5062
ANXA9	3803.28	3970.61	1923.59	2854.21	1395.56	-0.941041	0.00892867	0.0490686	3886.95	2057.79
AOAH	13127.7	12793.8	11669.4	11633.4	10177	-0.21427	0.356251	0.55483	12960.8	11159.9
AOAH-IT1	235.835	267.987	414.807	199.375	176.45	-0.00297262	0.995838	0.998384	251.911	263.544
AOC1	19.1541	259.506	10.7463	56.2829	1.00256	-2.37717	0.0387231	0.131415	139.33	22.6772
AOC2	1203.12	1450.18	877.973	470.296	552.409	-1.08304	0.00740681	0.0431644	1326.65	633.559
AOC3	853.554	858.236	527.643	326.25	411.048	-1.03526	0.0262431	0.101208	855.895	421.647
AOC4P	76.6164	69.5408	32.2389	9.53947	27.069	-1.85295	5.85295e-05	0.00144236	73.0786	22.9491
AOX1	13.1684	6.78447	8.59704	2.86184	2.00511	-1.2107	0.236898	NA	9.97646	4.488
AOX2P	3.59139	0	2.14926	0	0	-2.02093	0.426778	NA	1.7957	0.71642
AP1AR	530.329	391.803	315.941	750.756	646.649	0.262578	0.248302	0.443105	461.066	571.116
AP1B1	1218.68	961.699	1115.47	1762.89	1273.25	0.327619	0.266086	0.462592	1090.19	1383.87
AP1G1	10066.7	13972.6	13874.5	8810.65	12199.1	-0.0494041	0.659195	0.799468	12019.6	11628.1
AP1G2	3436.96	2656.12	4108.31	3625	3394.66	0.291365	0.143239	0.312016	3046.54	3709.32
AP1M1	833.203	1338.24	1068.18	840.427	704.798	-0.282591	0.297677	0.496202	1085.72	871.136
AP1M2	141.261	83.1098	63.4032	124.967	51.1304	-0.483604	0.533878	0.708239	112.186	79.8335
AP1S1	203.512	111.944	99.9406	272.829	223.57	0.279393	0.317335	0.516559	157.728	198.78
AP1S2	5361.95	3848.49	2002.04	7150.79	3704.45	-0.269842	0.251958	0.447532	4605.22	4285.76
AP1S3	237.032	94.9826	554.509	137.368	320.818	0.729826	0.130015	0.293859	166.007	337.565
AP2A1	1161.22	1706.29	1389.5	877.631	1045.67	-0.377411	0.170843	0.350733	1433.76	1104.26
AP2A2	685.956	712.37	715.703	863.322	647.652	0.0773566	0.654525	0.795779	699.163	742.226
AP2B1	5584.62	6769.21	6035.12	6171.08	6358.22	0.00220395	0.985695	0.992787	6176.91	6188.14
AP2M1	6448.94	8132.89	5012.07	6016.54	4660.89	-0.475849	0.00404189	0.0282033	7290.92	5229.84
AP2S1	764.967	708.977	393.315	949.177	683.744	-0.202679	0.34382	0.543016	736.972	675.412
AP3B1	3345.98	3694.15	3978.28	3828.19	4021.26	0.16403	0.263863	0.460446	3520.06	3942.58
AP3B2	120.91	1526.51	19.3433	65.8223	124.317	-2.76585	0.013957	0.0667781	823.708	69.8276
AP3D1	1480.85	1629.97	1397.02	1408.03	1548.95	-0.0955673	0.518912	0.697472	1555.41	1451.33
AP3M1	2554.68	2184.6	1961.2	2755	1832.67	-0.135967	0.358928	0.557357	2369.64	2182.96
AP3M2	827.217	863.324	1057.44	427.368	1728.41	0.228234	0.489106	0.673013	845.271	1071.07
AP3S1	3381.89	4469.27	2388.9	2196.94	2141.46	-0.789103	7.34783e-07	5.90803e-05	3925.58	2242.43
AP3S2	7.18279	6.78447	13.9702	5.72368	10.0256	0.434262	0.557013	NA	6.98363	9.90648
AP4B1	1422.19	1166.93	1796.78	1345.07	1084.77	0.116303	0.549362	0.719531	1294.56	1408.87
AP4B1-AS1	142.459	173.004	239.642	191.743	107.274	0.188369	0.552525	0.72186	157.731	179.553
AP4E1	1033.12	902.335	1154.15	1850.66	935.386	0.409035	0.114142	0.270583	967.729	1313.4
AP4M1	81.4049	110.248	125.732	145.954	95.2429	0.361065	0.246504	0.441333	95.8263	122.31
AP4S1	317.24	313.782	511.524	459.802	452.153	0.590701	0.000258262	0.00414983	315.511	474.493
AP5B1	17544	25775.9	16713.7	19080.8	22908.4	-0.127099	0.598032	0.755016	21659.9	19567.7
AP5M1	1715.49	1611.31	1845.14	2696.81	2019.15	0.376297	0.00330908	0.0245542	1663.4	2187.03
AP5S1	63.4479	83.1098	73.0748	101.118	135.345	0.504121	0.106441	0.258198	73.2789	103.179
AP5Z1	432.164	590.249	398.688	234.671	547.396	-0.388568	0.303455	0.502681	511.207	393.585
APAF1	15034.8	21937.6	11527.6	16864.8	9789.97	-0.531458	0.0846133	0.222611	18486.2	12727.5
APBA1	8.37992	1.69612	6.44778	7.63158	21.0537	1.275	0.111075	0.265602	5.03802	11.711
APBA2	148.444	383.323	581.375	305.263	224.573	0.00720522	0.990656	0.995541	265.883	370.404
APBA3	44.2938	57.668	45.1345	26.7105	158.404	0.595995	0.333254	0.531925	50.9809	76.7497
APBB1	264.566	198.446	529.793	302.401	478.22	0.873573	0.0136024	0.0655816	231.506	436.805
APBB1IP	16249.9	25521.5	12158.4	15656.2	11751	-0.621646	0.00117568	0.0122076	20885.7	13188.5
APBB2	287.311	617.387	405.135	270.921	138.353	-0.592222	0.237272	0.431257	452.349	271.47
APBB3	2363.14	3622.91	1332.54	1160	2240.72	-0.899032	0.000210825	0.00358518	2993.02	1577.75
APC	4740.64	7038.89	5309.75	5837.2	5436.87	-0.0593788	0.752307	0.861869	5889.76	5527.94
APC2	26.3369	32.2262	23.6419	25.7566	35.0895	-0.0514134	0.931296	0.964133	29.2816	28.1626
APCDD1	14.3656	20.3534	5.37315	43.8816	11.0281	-0.392104	0.612055	0.764837	17.3595	20.0943
APCDD1L	5.98565	1.69612	2.14926	1.90789	2.00511	-0.858516	0.513379	NA	3.84089	2.02076
APCDD1L-AS1	8.37992	5.08835	6.44778	0.953947	4.01023	-1.26033	0.237342	NA	6.73414	3.80399
APEH	1313.25	1248.34	1301.38	1371.78	1093.79	-0.0248631	0.897224	0.949411	1280.8	1255.65
APEX1	1741.83	1109.26	1703.29	2434.47	1446.69	0.383421	0.00672576	0.0402647	1425.54	1861.48
APEX2	252.595	228.976	236.419	505.592	226.578	0.332228	0.135816	0.301698	240.785	322.863
APH1A	3475.27	4494.71	3941.74	4121.05	4470.4	0.0814737	0.409951	0.60575	3984.99	4177.73
APH1B	1806.47	3210.75	2681.2	3719.44	851.171	-0.0443187	0.909401	0.954704	2508.61	2417.27
API5	1965.69	1265.3	2286.81	3619.27	2138.45	0.717675	6.21586e-07	5.18396e-05	1615.5	2681.51
APIP	547.089	325.655	289.075	466.48	398.015	-0.183867	0.425446	0.619998	436.372	384.524
APITD1	3.59139	8.48059	10.7463	2.86184	4.01023	-0.256126	0.815587	NA	6.03599	5.87279
APLF	155.627	81.4137	78.448	138.322	117.299	-0.0797699	0.833042	0.913897	118.52	111.356
APLN	0	3.39224	0	0.953947	1.00256	-0.978008	0.596445	NA	1.69612	0.652168
APLP1	17.957	6.78447	11.8209	7.63158	18.046	-0.0218678	0.97935	0.989702	12.3707	12.4995
APLP2	33878.8	35398	20658.7	36305.3	26066.5	-0.355408	0.0190572	0.0821099	34638.4	27676.8
APMAP	9629.72	27763.8	12590.4	12040.7	4706	-0.790442	0.0541637	0.16458	18696.7	9779.03
APOA1-AS	23.9426	16.9612	30.0896	18.125	42.1074	0.472271	0.254582	0.45057	20.4519	30.1073
APOA1BP	275.34	181.485	245.016	274.737	271.693	0.217817	0.325673	0.52483	228.412	263.815
APOA2	386.673	413.853	371.822	136.414	1411.6	0.319064	0.644693	0.789082	400.263	639.946
APOBEC2	69.4336	44.0991	85.9704	79.1776	72.1841	0.474704	0.155118	0.328371	56.7663	79.1107
APOBEC3A	1953.72	5519.17	2507.11	883.355	4179.66	-0.552293	0.0748404	0.204937	3736.44	2523.38
APOBEC3B	65.8422	42.403	25.7911	69.6381	287.734	1.23962	0.208991	0.398343	54.1226	127.721
APOBEC3B-AS1	15.5627	13.5689	2.14926	12.4013	6.01534	-1.23359	0.142089	NA	14.5658	6.8553
APOBEC3C	744.615	373.146	654.45	1457.63	1194.05	0.964856	0.00110047	0.0115879	558.881	1102.04
APOBEC3D	436.953	239.153	551.285	483.651	625.596	0.750357	0.0134385	0.0650916	338.053	553.511
APOBEC3F	617.72	281.556	400.837	896.71	1164.97	0.917684	0.0200256	0.0851129	449.638	820.84
APOBEC3G	1327.62	1287.35	1443.23	2250.36	2176.55	0.56864	0.00226824	0.0189866	1307.49	1956.71
APOBEC3H	219.075	189.965	258.986	148.816	144.368	-0.19374	0.621344	0.772076	204.52	184.057
APOBEC4	1.19713	3.39224	2.14926	0.953947	6.01534	0.429927	0.739024	NA	2.29468	3.03952
APOBR	28910.7	54937.3	16273.1	16013.9	28250.1	-0.989765	0.000828723	0.00951054	41924	20179
APOC1	1.19713	0	1.07463	0	2.00511	-1.18524	0.848494	NA	0.598565	1.02658
APOD	1.19713	1.69612	6.44778	0	2.00511	-0.0662175	0.980144	NA	1.44662	2.81763
APOE	14.3656	10.1767	25.7911	0.953947	20.0511	-0.327837	0.73853	0.853624	12.2711	15.5987
APOF	4.78852	6.78447	2.14926	2.86184	17.0435	0.314379	0.760949	NA	5.7865	7.35152
APOL1	2008.79	2857.96	2026.75	4532.2	10811.6	1.23617	0.013096	0.0639662	2433.37	5790.18
APOL2	5901.86	7649.49	4744.49	7774.67	14462.9	0.398283	0.228252	0.421329	6775.67	8994.02
APOL3	1405.43	581.769	1399.17	3820.56	3274.35	1.48952	2.91734e-05	0.00086795	993.6	2831.36
APOL4	44.2938	30.5301	19.3433	110.658	96.2455	0.81267	0.279581	0.477321	37.412	75.4156
APOL5	0	0	1.07463	0.953947	3.00767	2.74217	0.305319	NA	0	1.67875
APOL6	9951.75	11364	16430	33660	79406.5	1.99225	0.000301199	0.0046665	10657.9	43165.5
APOLD1	193.935	96.6787	156.896	91.5789	96.2455	-0.319664	0.45213	0.643982	145.307	114.907
APOM	257.383	415.549	305.195	120.197	346.885	-0.449902	0.0286025	0.107287	336.466	257.426
APOO	117.319	113.64	75.2241	100.164	113.289	-0.263704	0.395415	0.591632	115.479	96.2258
APOOL	464.487	293.428	466.389	730.723	518.322	0.584913	0.00278731	0.0218949	378.958	571.812
APOPT1	177.175	208.623	189.135	216.546	177.453	0.0136194	0.943828	0.971653	192.899	194.378
APP	4482.06	4638.88	3718.22	7150.79	4662.89	0.134165	0.464671	0.654472	4560.47	5177.3
APPBP2	3136.48	2571.32	2402.87	3265.36	2746	-0.028832	0.846426	0.921541	2853.9	2804.75
APPL1	1868.72	1043.11	2281.44	2727.33	1788.56	0.647793	0.00653649	0.0395544	1455.92	2265.78
APPL2	5924.6	7895.43	5337.69	3652.66	3416.72	-0.732572	2.71351e-05	0.000822922	6910.02	4135.69
APRT	166.401	173.004	151.523	193.651	305.78	0.37327	0.350968	0.549481	169.703	216.985
APTR	568.637	619.083	416.956	320.526	191.488	-0.937055	0.00194843	0.0170287	593.86	309.657
APTX	588.988	520.708	635.106	642.96	631.611	0.194605	0.201108	0.388993	554.848	636.559
AQP1	73.025	40.7068	18.2687	7.63158	24.0614	-1.94001	0.0012302	0.0125709	56.8659	16.6539
AQP10	403.433	410.461	40.8359	82.9934	225.575	-1.73858	0.0394465	0.133121	406.947	116.468
AQP11	116.122	37.3146	85.9704	75.3618	92.2353	0.205207	0.534461	0.708533	76.7182	84.5225
AQP3	664.408	101.767	195.583	598.125	867.212	0.962916	0.190196	0.376335	383.087	553.64
AQP7	3.59139	1.69612	5.37315	1.90789	6.01534	0.613895	0.646924	NA	2.64376	4.43213
AQP7P1	43.0967	118.728	8.59704	48.6513	6.01534	-2.3649	0.0077433	0.0443823	80.9125	21.0879
AQP7P3	5.98565	16.9612	0	3.81579	0	-4.29982	0.0369998	NA	11.4734	1.27193
AQP8	1.19713	5.08835	2.14926	2.86184	15.0384	1.22967	0.382541	NA	3.14274	6.68315
AQP9	101161	196209	101418	93472.5	75471.5	-0.622063	0.0691239	0.194577	148685	90120.7
AQR	2005.19	1706.29	2546.87	2598.55	2761.04	0.503441	0.000158307	0.00290644	1855.74	2635.49
AR	4.78852	8.48059	1.07463	20.0329	7.0179	-0.0295823	0.974672	0.987348	6.63456	9.37514
ARAF	2444.54	5056.13	3915.95	2019.51	3695.43	-0.209214	0.381513	0.578114	3750.33	3210.29
ARAP1	10694	19390	9803.85	7059.21	9758.89	-0.704829	0.0102386	0.0541421	15042	8873.98
ARAP2	5655.25	4794.93	6849.69	8316.51	8271.1	0.573579	0.0109114	0.0566117	5225.09	7812.43
ARAP3	9398.67	11915.2	5469.87	3182.37	3655.32	-1.38215	1.73856e-05	0.000590019	10657	4102.52
ARCN1	3996.02	3285.38	3301.26	6736.77	3394.66	0.224991	0.236123	0.430349	3640.7	4477.57
AREG	47.8852	208.623	625.435	28.6184	35.0895	0.329619	0.686093	0.819163	128.254	229.714
AREL1	5196.75	8312.68	5460.19	6029.9	3852.83	-0.358805	0.0710333	0.198173	6754.71	5114.31
ARF1	11464.9	18489.4	10228.3	8980.46	10782.5	-0.549903	0.00114977	0.0119942	14977.2	9997.1
ARF3	11643.3	14026.9	7869.51	11620	8613.97	-0.464462	0.0001356	0.00261188	12835.1	9367.84
ARF4	8190.77	9932.47	7173.15	6192.07	6408.35	-0.45122	0.0305902	0.112377	9061.62	6591.19
ARF5	2328.42	2735.84	1562.51	1412.8	1574.01	-0.723482	0.000990076	0.010691	2532.13	1516.44
ARF6	6510	6835.36	5437.63	6886.54	5634.37	-0.163416	0.278012	0.475661	6672.68	5986.18
ARFGAP1	770.952	1187.28	701.733	644.868	862.199	-0.391613	0.138822	0.305978	979.118	736.267
ARFGAP2	2719.88	3163.26	3384.01	3115.59	3614.22	0.204141	0.267768	0.464656	2941.57	3371.27
ARFGAP3	4404.24	6855.71	3900.91	2744.51	3336.51	-0.731968	2.66399e-05	0.00081262	5629.98	3327.31
ARFGEF1	5299.7	6089.06	5606.34	7332.99	3998.2	-0.019111	0.928353	0.963022	5694.38	5645.84
ARFGEF2	2203.92	1304.31	3195.95	3100.33	3159.06	0.864386	4.73662e-07	4.04638e-05	1754.12	3151.78
ARFGEF3	11.9713	10.1767	4.29852	6.67763	28.0716	0.275775	0.760057	0.866875	11.074	13.0159
ARFIP1	5534.34	4355.63	1711.89	2398.22	3252.3	-1.03701	0.00665735	0.0400079	4944.98	2454.13
ARFIP2	982.845	759.861	994.033	1026.45	997.544	0.206519	0.0806141	0.215801	871.353	1006.01
ARFRP1	232.243	267.987	191.284	297.631	207.529	-0.133547	0.517512	0.696128	250.115	232.148
ARG1	10898.7	44224.6	19831.2	10454.3	1710.36	-0.983232	0.194344	0.380877	27561.6	10665.3
ARG2	392.659	401.98	312.717	537.072	410.046	0.0550565	0.816538	0.903813	397.319	419.945
ARGFX	2.39426	5.08835	2.14926	0	0	-2.74161	0.154323	NA	3.74131	0.71642
ARGFXP2	341.182	330.743	284.777	293.816	373.954	-0.0986529	0.74267	0.856029	335.963	317.515
ARGLU1	12171.2	13277.2	13737	10352.2	11357	-0.113222	0.297585	0.496202	12724.2	11815.4
ARHGAP1	3130.5	4672.81	2796.19	3016.38	2755.03	-0.427857	0.0537849	0.16385	3901.65	2855.86
ARHGAP10	203.512	120.424	202.03	153.585	172.44	0.15738	0.648246	0.7917	161.968	176.019
ARHGAP11A	363.928	193.357	347.105	598.125	461.176	0.73545	0.0478429	0.151353	278.643	468.802
ARHGAP11B	45.491	35.6185	68.7763	106.842	66.1688	0.951445	0.0047906	0.0319897	40.5547	80.5957
ARHGAP12	1954.91	1602.83	2700.54	1715.2	1403.58	0.105573	0.592347	0.751226	1778.87	1939.77
ARHGAP15	5741.44	11978	5434.4	4254.6	6060.46	-0.681329	0.00173682	0.0159436	8859.71	5249.82
ARHGAP17	1276.14	1188.98	1932.18	1826.81	1986.07	0.632854	0.000648416	0.00799394	1232.56	1915.02
ARHGAP18	1409.02	1458.66	750.092	2050.99	1046.67	-0.271652	0.340747	0.539872	1433.84	1282.58
ARHGAP19	5144.07	5783.76	3779.47	3396.05	1702.34	-0.878472	0.00852087	0.0473754	5463.92	2959.29
ARHGAP20	16.7598	5.08835	55.8808	7.63158	1.00256	0.482645	0.620299	0.771205	10.9241	21.505
ARHGAP21	1878.3	2062.48	1635.59	2986.81	2030.18	0.116609	0.687983	0.820233	1970.39	2217.52
ARHGAP22	27.534	10.1767	2.14926	9.53947	30.0767	-0.285628	0.732444	0.849597	18.8554	13.9218
ARHGAP23	10.7742	8.48059	7.52241	37.2039	34.0869	1.26179	0.127041	0.289299	9.62738	26.2711
ARHGAP24	1728.66	1416.26	4542.46	1793.42	1048.67	0.521068	0.281064	0.478688	1572.46	2461.52
ARHGAP25	23277	26430.6	16210.8	14771.9	14650.4	-0.703455	0.00112697	0.0118192	24853.8	15211
ARHGAP26	24846.5	46746.7	23623.6	18866.2	23208.2	-0.646975	0.00120132	0.0123674	35796.6	21899.3
ARHGAP26-AS1	9.57705	23.7457	9.67167	1.90789	19.0486	-0.809423	0.290054	0.48825	16.6614	10.2094
ARHGAP26-IT1	99.3619	174.7	124.657	53.421	98.2506	-0.596239	0.147593	0.317878	137.031	92.1096
ARHGAP27	10638.9	14449.2	7225.81	8139.08	8682.15	-0.61952	0.00801832	0.0454296	12544.1	8015.68
ARHGAP29	481.247	237.457	306.27	523.717	58.1483	-0.331848	0.586663	0.747198	359.352	296.045
ARHGAP30	40374.4	63867.3	34201.2	35960	33114.5	-0.560488	0.000728889	0.00867749	52120.9	34425.2
ARHGAP31	758.981	422.333	478.21	1550.16	963.458	0.586128	0.055622	0.167905	590.657	997.277
ARHGAP31-AS1	21.5484	6.78447	23.6419	39.1118	29.0742	0.974108	0.0336762	0.119906	14.1664	30.6093
ARHGAP32	223.863	142.474	111.762	372.039	329.841	0.506939	0.0816975	0.217476	183.169	271.214
ARHGAP33	101.756	189.965	74.1495	48.6513	128.327	-0.777227	0.132198	0.296452	145.861	83.7094
ARHGAP35	1142.06	993.925	1567.88	1428.06	1069.73	0.348944	0.0663984	0.188864	1067.99	1355.22
ARHGAP39	2.39426	1.69612	0	0.953947	2.00511	-0.897147	0.625938	NA	2.04519	0.986354
ARHGAP4	2874.31	5398.74	2653.26	1805.82	2796.13	-0.749526	0.0117697	0.0597786	4136.53	2418.4
ARHGAP42	70.6307	15.2651	141.851	62.9605	108.276	1.37639	0.138677	0.305772	42.9479	104.363
ARHGAP44	16.7598	3.39224	4.29852	6.67763	18.046	-0.12578	0.891567	NA	10.076	9.67406
ARHGAP5	1338.39	831.098	1657.08	1458.58	1525.89	0.531006	0.023593	0.0953142	1084.75	1547.19
ARHGAP5-AS1	14.3656	3.39224	15.0448	9.53947	12.0307	0.424837	0.509356	0.689821	8.8789	12.205
ARHGAP6	247.806	259.506	235.344	247.072	211.54	-0.0883011	0.882227	0.941943	253.656	231.319
ARHGAP9	26467.4	34709.4	15937.8	14545.8	14583.2	-1.00611	4.13552e-05	0.00111502	30588.4	15022.3
ARHGDIA	1176.78	3298.95	1494.81	907.204	1943.96	-0.552024	0.127773	0.290678	2237.86	1448.66
ARHGDIB	78595.2	122677	60671.5	57996.2	42026.2	-0.883247	0.000841863	0.00961367	100636	53564.6
ARHGEF1	6041.92	10938.3	6850.77	3303.52	5302.53	-0.726459	0.0588912	0.174745	8490.09	5152.27
ARHGEF10	63.4479	47.4913	66.6271	106.842	136.348	0.911797	0.0788138	0.212725	55.4696	103.272
ARHGEF10L	161.613	83.1098	58.03	224.178	162.414	0.245184	0.581596	0.743817	122.361	148.207
ARHGEF11	6161.63	9243.84	6077.03	6352.33	6245.93	-0.270444	0.175996	0.357256	7702.74	6225.1
ARHGEF12	1927.38	1904.74	1710.81	3526.74	1633.17	0.21391	0.552335	0.721745	1916.06	2290.24
ARHGEF17	143.656	140.778	73.0748	41.0197	31.0793	-1.61766	0.0108471	0.0564274	142.217	48.3913
ARHGEF18	1507.19	1519.72	2622.1	1192.43	1483.78	0.155606	0.490208	0.674089	1513.45	1766.11
ARHGEF19	254.989	237.457	861.853	170.757	147.376	0.359352	0.412825	0.608448	246.223	393.329
ARHGEF2	8446.96	8249.92	4522.04	5651.18	5213.3	-0.709638	2.02844e-05	0.000661203	8348.44	5128.84
ARHGEF25	10.7742	3.39224	18.2687	45.7895	9.02302	1.71788	0.0158164	0.0726755	7.08321	24.3604
ARHGEF26	19.1541	10.1767	40.8359	41.9737	17.0435	1.15904	0.0854979	0.224025	14.6654	33.2844
ARHGEF26-AS1	4.78852	6.78447	0	0	0	-4.9404	0.0110896	NA	5.7865	0
ARHGEF28	5.98565	13.5689	81.6719	19.0789	10.0256	1.62766	0.0578487	0.172337	9.7773	36.9255
ARHGEF3	3004.8	2717.18	3879.41	4142.99	4781.2	0.578681	0.000404424	0.00570992	2860.99	4267.87
ARHGEF33	7.18279	3.39224	5.37315	11.4474	20.0511	1.25792	0.164395	NA	5.28751	12.2906
ARHGEF34P	44.2938	45.7952	47.2837	61.0526	48.1227	0.196813	0.729024	0.847007	45.0445	52.153
ARHGEF35	38.3082	15.2651	23.6419	20.9868	31.0793	-0.0738957	0.887796	0.94448	26.7866	25.236
ARHGEF37	33.5197	22.0495	0	19.0789	11.0281	-1.91685	0.0237463	0.0956379	27.7846	10.0357
ARHGEF39	95.7705	66.1486	128.956	102.072	42.1074	0.167684	0.690507	0.822086	80.9595	91.0451
ARHGEF4	20.3512	25.4418	16.1194	9.53947	8.02046	-1.022	0.108423	0.261172	22.8965	11.2265
ARHGEF40	12395.1	25292.5	7754.53	4088.62	5734.63	-1.67773	1.98018e-05	0.000650887	18843.8	5859.26
ARHGEF5	107.742	96.6787	76.2987	103.98	81.2071	-0.229571	0.612934	0.765307	102.21	87.162
ARHGEF6	9368.75	10509.1	8489.58	10390.4	7143.22	-0.20324	0.205106	0.393907	9938.95	8674.4
ARHGEF7	1960.9	2425.45	2398.57	1835.39	2298.86	-0.0145324	0.917818	0.958662	2193.17	2177.61
ARHGEF9	508.781	495.267	735.047	538.026	534.363	0.231491	0.25926	0.455098	502.024	602.479
ARHGEF9-IT1	2.39426	5.08835	11.8209	2.86184	6.01534	0.690541	0.514533	NA	3.74131	6.89937
ARID1A	9791.33	13214.5	10131.6	9060.59	9323.78	-0.260016	0.0613211	0.179396	11502.9	9505.33
ARID1B	2713.9	2340.64	3864.37	2441.15	3039.75	0.278795	0.0851568	0.223348	2527.27	3115.09
ARID2	2393.06	2783.33	3709.62	2424.93	2818.19	0.18998	0.187669	0.373503	2588.2	2984.25
ARID3A	715.884	1423.04	624.36	1163.82	466.189	-0.504052	0.056216	0.169112	1069.46	751.455
ARID3B	2688.76	3721.28	2726.34	1569.24	2696.88	-0.478383	0.000137761	0.00263059	3205.02	2330.82
ARID3C	4.78852	0	0	0	1.00256	-2.81922	0.290931	NA	2.39426	0.334186
ARID4A	7956.13	11263.9	8433.7	7007.69	8563.84	-0.245225	0.149299	0.320008	9610.03	8001.74
ARID4B	10483.3	15806.1	12380.8	10243.5	15578.7	-0.0196907	0.9087	0.954581	13144.7	12734.3
ARID5A	946.931	3061.49	1888.12	598.125	1811.62	-0.407616	0.287605	0.485579	2004.21	1432.62
ARID5B	2803.68	1913.22	4477.98	1336.48	4641.84	0.342988	0.321627	0.520842	2358.45	3485.43
ARIH1	5752.21	6988.01	7219.36	3954.11	6079.51	-0.183948	0.124854	0.286592	6370.11	5750.99
ARIH2	3513.58	3304.04	4034.16	4026.61	3619.23	0.190433	0.0836425	0.220563	3408.81	3893.33
ARIH2OS	15.5627	47.4913	39.7613	47.6973	40.1023	0.498246	0.279138	0.476962	31.527	42.5203
ARL1	761.375	415.549	776.957	1143.78	729.862	0.60648	0.00181915	0.0163852	588.462	883.534
ARL10	68.2365	40.7068	127.881	52.4671	124.317	0.862655	0.0072972	0.0427232	54.4716	101.555
ARL11	2412.22	2964.81	2311.53	2354.34	1199.06	-0.442874	0.131744	0.295891	2688.52	1954.98
ARL13A	52.6738	13.5689	80.5972	39.1118	57.1458	0.862137	0.0680085	0.192147	33.1214	58.9516
ARL13B	271.749	222.191	195.583	320.526	268.685	0.0641493	0.739717	0.854304	246.97	261.598
ARL14	0	1.69612	0	0	6.01534	1.33485	0.728217	NA	0.848059	2.00511
ARL14EP	393.856	271.379	498.628	886.217	691.765	1.05295	5.67925e-06	0.00025985	332.617	692.203
ARL14EPL	0	0	0	0.953947	1.00256	1.24164	0.66748	NA	0	0.652168
ARL15	1211.5	905.727	894.092	1200.07	649.657	-0.228825	0.391983	0.588113	1058.61	914.605
ARL16	435.756	347.704	358.926	226.085	169.432	-0.658301	0.0114633	0.0585475	391.73	251.481
ARL17A	1261.78	1975.98	1001.56	1070.33	890.271	-0.777007	0.053022	0.162211	1618.88	987.385
ARL2	4.78852	6.78447	3.22389	10.4934	12.0307	0.585265	0.432335	NA	5.7865	8.58266
ARL2BP	1078.61	810.744	946.749	1374.64	1097.8	0.260653	0.018099	0.0793075	944.68	1139.73
ARL3	834.4	1073.64	444.897	541.842	394.005	-1.04352	2.60669e-05	0.000796691	954.022	460.248
ARL4A	1814.85	2552.66	1385.2	2414.44	2400.12	-0.0612556	0.827993	0.91041	2183.75	2066.59
ARL4C	2347.57	2880.01	7917.87	3760.46	3167.08	0.759857	0.0960602	0.241058	2613.79	4948.47
ARL4D	27.534	16.9612	25.7911	24.8026	3.00767	-0.31465	0.615403	0.767187	22.2476	17.8671
ARL5A	1778.94	1368.77	1407.77	2204.57	1729.41	0.164894	0.313794	0.512337	1573.85	1780.58
ARL5B	946.931	2094.71	2019.23	1030.26	3750.57	0.579988	0.127847	0.290736	1520.82	2266.69
ARL5C	3.59139	0	3.22389	10.4934	3.00767	1.33738	0.278134	NA	1.7957	5.57499
ARL6	64.6451	27.1379	63.4032	51.5131	55.1406	0.328785	0.326331	0.52542	45.8915	56.6856
ARL6IP1	5839.6	5403.83	4259.83	4709.64	3793.68	-0.40291	0.0117457	0.059676	5621.72	4254.38
ARL6IP4	699.124	634.348	644.778	610.526	743.897	0.00831012	0.973836	0.986993	666.736	666.4
ARL6IP5	8815.67	10047.8	6667	10783.4	6779.29	-0.252177	0.140428	0.308068	9431.74	8076.57
ARL6IP6	1088.19	1355.2	874.749	1323.12	590.506	-0.41343	0.0516993	0.159513	1221.7	929.46
ARL8A	2543.9	4649.06	2698.4	1667.5	2815.18	-0.551155	0.00484336	0.032287	3596.48	2393.69
ARL8B	3555.48	2622.2	2708.07	4229.8	3672.37	0.159818	0.413961	0.609378	3088.84	3536.75
ARL9	0	0	0	0.953947	3.00767	2.35839	0.257578	NA	0	1.32054
ARMC1	418.996	251.025	452.419	765.065	312.798	0.577779	0.00805114	0.0454894	335.011	510.094
ARMC10	544.695	502.051	415.882	704.967	512.307	0.0218463	0.909634	0.954711	523.373	544.385
ARMC12	301.677	483.394	627.584	272.829	55.1406	-0.295901	0.669376	0.807257	392.535	318.518
ARMC2	319.634	630.956	312.717	277.599	310.793	-0.620346	0.0403077	0.135088	475.295	300.37
ARMC2-AS1	35.9139	67.8447	32.2389	26.7105	37.0946	-0.63955	0.229856	0.423243	51.8793	32.0147
ARMC3	40.7025	78.0214	11.8209	27.6645	23.0588	-1.52984	0.0102083	0.0540905	59.3619	20.8481
ARMC4	0	1.69612	2.14926	0	2.00511	0.429112	0.843995	NA	0.848059	1.38479
ARMC5	32.3225	89.8943	87.045	69.6381	135.345	0.692643	0.133209	0.298029	61.1084	97.3428
ARMC6	65.8422	93.2865	98.8659	121.151	74.1892	0.292956	0.501455	0.683263	79.5644	98.0688
ARMC7	397.447	517.316	280.478	516.085	381.974	-0.242814	0.190355	0.376412	457.382	392.846
ARMC8	3289.72	3524.53	3191.65	3700.36	3064.82	-0.0377141	0.724254	0.843842	3407.12	3318.94
ARMC9	5.98565	5.08835	8.59704	4.76973	10.0256	0.429958	0.605366	0.760296	5.537	7.79745
ARMCX1	16.7598	10.1767	13.9702	45.7895	21.0537	0.834444	0.143145	0.311934	13.4683	26.9378
ARMCX2	74.2221	23.7457	78.448	90.625	76.1944	0.786547	0.278675	0.47642	48.9839	81.7558
ARMCX3	2315.25	2133.72	2062.21	2655.79	2075.29	0.0214255	0.924541	0.961648	2224.48	2264.43
ARMCX4	682.365	720.85	940.301	838.519	697.78	0.239929	0.241686	0.435612	701.607	825.533
ARMCX5	227.455	286.644	361.076	418.783	328.839	0.51355	0.0244864	0.0970236	257.049	369.566
ARMCX5-GPRASP2	16.7598	10.1767	5.37315	15.2632	11.0281	-0.379919	0.484273	0.669923	13.4683	10.5548
ARMCX6	424.981	395.196	455.643	606.71	515.314	0.351013	0.0350968	0.123162	410.089	525.889
ARMT1	1456.91	1328.06	749.017	1878.32	828.112	-0.390178	0.029169	0.108839	1392.48	1151.82
ARNT	4814.86	4913.65	4516.67	6212.1	3244.28	-0.0806685	0.681588	0.815862	4864.26	4657.68
ARNT2	3.59139	3.39224	0	0.953947	1.00256	-2.51151	0.244462	NA	3.49181	0.652168
ARNTL	5626.52	8451.76	6765.87	3176.64	4607.75	-0.565059	0.000346379	0.00513315	7039.14	4850.09
ARNTL2	96.9676	35.6185	40.8359	153.585	253.647	1.0924	0.0793647	0.213734	66.293	149.356
ARPC1A	1723.87	2286.37	1515.23	1930.79	1879.79	-0.163997	0.126697	0.288985	2005.12	1775.27
ARPC1B	3075.43	4954.36	2171.83	2868.52	2901.4	-0.572371	0.0229438	0.0936347	4014.9	2647.25
ARPC2	34491.7	53337.8	28258.5	26791.6	26359.2	-0.661994	1.36776e-05	0.000498723	43914.8	27136.4
ARPC3	33474.2	58405.8	31392.1	30812.5	27535.2	-0.562605	0.00220792	0.0186218	45940	29913.3
ARPC4	6260.99	9652.61	4898.16	5180.89	4492.46	-0.681753	0.00084806	0.00966973	7956.8	4857.17
ARPC5	22055.9	22941.7	14357.1	24677.7	10013.5	-0.510788	0.0641139	0.184685	22498.8	16349.4
ARPC5L	1576.62	1528.2	1066.03	733.585	1658.23	-0.469658	0.106109	0.257706	1552.41	1152.62
ARPIN	658.422	437.598	297.672	2233.19	550.404	0.414829	0.402119	0.598634	548.01	1027.09
ARPP19	8601.39	9009.78	7906.05	8557.86	7986.37	-0.109342	0.431943	0.625168	8805.58	8150.09
ARPP21	1.19713	0	0	0	0	-1.8165	0.619363	NA	0.598565	0
ARR3	108.939	57.668	97.7913	81.0855	92.2353	0.0971225	0.766802	0.872058	83.3035	90.3707
ARRB1	5347.58	4513.37	4007.29	5746.58	4767.16	-0.0125499	0.961846	0.980709	4930.48	4840.34
ARRB2	48747.2	75614.6	47216	36721.2	39547.9	-0.55816	0.000195439	0.00338603	62180.9	41161.7
ARRDC1	555.469	849.755	593.196	372.039	456.164	-0.520255	0.174202	0.355039	702.612	473.8
ARRDC1-AS1	128.093	98.3749	95.6421	88.7171	84.2148	-0.329023	0.158903	0.334196	113.234	89.5246
ARRDC2	2254.2	1763.96	4123.35	1897.4	1769.51	0.308293	0.177411	0.358986	2009.08	2596.76
ARRDC3	11304.5	9642.43	7150.59	7532.37	3963.11	-0.752092	0.0276574	0.104947	10473.5	6215.35
ARRDC3-AS1	161.613	149.258	193.433	94.4407	122.312	-0.236398	0.30809	0.50725	155.436	136.729
ARRDC4	2470.88	1982.76	1254.09	2499.34	4844.36	0.346507	0.441851	0.634586	2226.82	2865.93
ARRDC5	164.007	210.319	309.493	364.408	112.286	0.473575	0.231023	0.424511	187.163	262.063
ARSA	1033.12	1940.36	1143.41	574.276	920.348	-0.77632	0.0149312	0.069924	1486.74	879.343
ARSB	1209.1	831.098	1218.63	1837.3	1754.48	0.586173	0.0486902	0.153012	1020.1	1603.47
ARSD	1266.56	1039.72	773.733	2257.04	852.174	0.00140031	0.995009	0.998129	1153.14	1294.32
ARSG	1252.2	2929.2	1372.3	1269.7	718.834	-0.849443	0.0277216	0.105114	2090.7	1120.28
ARSJ	0	1.69612	3.22389	13.3553	1.00256	2.56842	0.118584	NA	0.848059	5.86057
ARSK	87.3906	50.8835	78.448	140.23	64.1637	0.444799	0.227198	0.420026	69.1371	94.2806
ART1	5.98565	27.1379	11.8209	2.86184	7.0179	-1.20009	0.165887	NA	16.5618	7.23356
ART3	2.39426	1.69612	16.1194	1.90789	13.0332	1.82234	0.120061	NA	2.04519	10.3535
ARTN	2.39426	0	4.29852	1.90789	1.00256	1.13196	0.521343	NA	1.19713	2.40299
ARV1	233.441	145.866	141.851	337.697	162.414	0.0964429	0.708615	0.834049	189.653	213.988
ARVCF	11.9713	20.3534	33.3135	23.8487	30.0767	0.766712	0.337841	0.536895	16.1624	29.0796
ASAH1	28828.1	51872.4	30607.6	20169.3	14741.6	-0.843936	0.00655653	0.0396146	40350.2	21839.5
ASAH2	0	1.69612	0	1.90789	0	-0.214894	0.933843	NA	0.848059	0.635965
ASAH2B	7.18279	1.69612	12.8956	17.171	9.02302	1.46882	0.0502286	0.156153	4.43945	13.0299
ASAP1	14207.5	21238.8	11483.5	12533.9	17701.2	-0.338793	0.229585	0.422844	17723.2	13906.2
ASAP1-IT1	2.39426	10.1767	7.52241	1.90789	5.01279	-0.453615	0.62602	NA	6.28549	4.81436
ASAP1-IT2	59.8565	115.336	50.5076	28.6184	120.307	-0.419015	0.40542	0.60155	87.5963	66.4776
ASAP2	328.014	352.793	77.3733	352.96	368.941	-0.368847	0.57556	0.739265	340.403	266.425
ASAP3	27.534	8.48059	155.821	17.171	28.0716	1.17313	0.126474	0.288602	18.0073	67.0213
ASB1	1449.73	1696.12	1717.26	1787.7	1196.05	-0.00907359	0.963275	0.981172	1572.92	1567
ASB11	0	1.69612	3.22389	2.86184	3.00767	2.0253	0.287533	NA	0.848059	3.03113
ASB12	3.59139	1.69612	15.0448	0.953947	14.0358	1.25325	0.279773	NA	2.64376	10.0115
ASB13	165.204	83.1098	76.2987	274.737	53.1355	-0.136935	0.652748	0.794425	124.157	134.724
ASB14	281.326	145.866	474.986	286.184	268.685	0.651711	0.0283959	0.106698	213.596	343.285
ASB15	1.19713	3.39224	7.52241	1.90789	32.0818	2.50596	0.0271662	NA	2.29468	13.8374
ASB16	532.723	551.238	560.957	540.888	349.892	-0.168808	0.442332	0.634986	541.981	483.912
ASB16-AS1	527.935	483.394	614.688	551.381	389.995	0.0357013	0.889596	0.945331	505.664	518.688
ASB2	14.3656	5.08835	10.7463	14.3092	17.0435	0.604446	0.380548	0.577042	9.72696	14.033
ASB3	49.0824	35.6185	23.6419	12.4013	32.0818	-0.912935	0.0277547	0.105138	42.3504	22.7083
ASB6	897.848	1183.89	1074.63	559.967	641.637	-0.488066	0.0175615	0.0778255	1040.87	758.744
ASB7	2431.37	3327.78	2362.04	2274.21	2445.24	-0.265438	0.0643426	0.185174	2879.58	2360.49
ASB8	2958.11	4153.79	3327.05	3608.78	3118.96	-0.0629998	0.636803	0.783277	3555.95	3351.6
ASB9	19.1541	6.78447	11.8209	20.0329	22.0563	0.524758	0.493198	0.67654	12.9693	17.97
ASB9P1	153.233	230.672	103.164	73.4539	153.391	-0.826919	0.0687111	0.193612	191.952	110.003
ASCC1	1511.98	1400.99	1461.5	1883.09	797.033	-0.0802088	0.782151	0.881811	1456.48	1380.54
ASCC2	1143.26	1153.36	1280.96	1425.2	1337.41	0.231581	0.126987	0.289299	1148.31	1347.86
ASCC3	1300.08	673.359	2183.65	1635.07	2147.48	1.02584	2.22268e-05	0.000706886	986.722	1988.73
ASCL2	9.57705	22.0495	13.9702	28.6184	22.0563	0.436079	0.411539	0.607276	15.8133	21.5483
ASCL3	1.19713	0	1.07463	3.81579	1.00256	1.34016	0.476166	NA	0.598565	1.96432
ASF1A	239.426	162.827	202.03	503.684	194.496	0.477408	0.0953153	0.239995	201.127	300.07
ASF1B	381.885	451.167	192.359	248.98	95.2429	-1.25575	0.00465696	0.0313375	416.526	178.861
ASGR1	50.2795	27.1379	16.1194	90.625	76.1944	0.546294	0.283927	0.48168	38.7087	60.9796
ASGR2	557.863	776.822	449.195	694.473	805.053	0.0170498	0.970441	0.985271	667.343	649.574
ASH1L	7699.95	7717.34	9828.56	7705.98	8851.58	0.178988	0.17275	0.353151	7708.64	8795.38
ASH1L-AS1	57.4623	72.9331	70.9256	62.0066	137.35	0.464086	0.193411	0.379917	65.1977	90.0942
ASH2L	1704.71	1635.06	1527.05	2289.47	1492.81	0.0590962	0.694088	0.823697	1669.89	1769.78
ASIC1	10.7742	6.78447	15.0448	4.76973	27.069	0.78899	0.310717	0.509383	8.77933	15.6279
ASIC3	55.068	42.403	60.1793	38.1579	83.2123	0.297868	0.518247	0.696818	48.7355	60.5165
ASIC4	3.59139	0	0	0.953947	1.00256	-1.33638	0.55321	NA	1.7957	0.652168
ASIP	2.39426	0	4.29852	0	4.01023	0.304763	0.861579	NA	1.19713	2.76958
ASL	723.067	975.268	637.256	490.329	332.849	-0.794478	0.0152699	0.0709382	849.168	486.811
ASNA1	417.799	585.161	396.538	538.026	766.956	0.194758	0.564999	0.731877	501.48	567.174
ASNS	931.368	1080.43	890.868	915.789	1395.56	0.074785	0.843172	0.919821	1005.9	1067.41
ASNSD1	2048.29	2790.11	1268.06	1807.73	1706.35	-0.586491	0.00992254	0.0530328	2419.2	1594.05
ASPDH	40.7025	27.1379	48.3583	82.9934	37.0946	0.714318	0.177614	0.359053	33.9202	56.1488
ASPH	16060.7	34168.3	16853.4	10857.8	3184.12	-1.12759	0.0458828	0.146786	25114.5	10298.5
ASPHD1	7.18279	0	2.14926	10.4934	7.0179	0.59237	0.589073	NA	3.59139	6.55353
ASPHD2	155.627	161.131	130.03	226.085	260.665	0.354575	0.253921	0.449754	158.379	205.594
ASPM	184.358	140.778	113.911	452.171	325.831	0.783108	0.204744	0.393404	162.568	297.304
ASPN	2.39426	0	4.29852	0	4.01023	1.22054	0.523238	NA	1.19713	2.76958
ASPRV1	1446.13	2912.23	1071.41	1082.73	859.192	-1.01912	0.000120587	0.0024006	2179.18	1004.44
ASPSCR1	74.2221	89.8943	77.3733	70.5921	89.2276	-0.0325882	0.937491	0.96803	82.0582	79.0643
ASRGL1	130.487	132.297	47.2837	240.395	175.448	0.0443623	0.903725	0.95238	131.392	154.375
ASS1	8.37992	1.69612	1.07463	2.86184	7.0179	-0.396431	0.872405	NA	5.03802	3.65146
ASTE1	233.441	249.329	275.105	488.421	394.005	0.653361	0.0049185	0.0325939	241.385	385.844
ASTL	5.98565	5.08835	31.1643	2.86184	3.00767	0.51158	0.60385	0.759487	5.537	12.3446
ASTN2	16.7598	1.69612	6.44778	12.4013	21.0537	0.647944	0.370781	0.567673	9.22798	13.3009
ASTN2-AS1	2.39426	1.69612	3.22389	4.76973	10.0256	1.75256	0.228914	NA	2.04519	6.0064
ASUN	654.831	344.312	550.21	934.868	692.767	0.545097	0.00529794	0.0343664	499.571	725.949
ASXL1	4078.63	4104.61	4637.03	3976.05	5702.55	0.216543	0.123986	0.284957	4091.62	4771.87
ASXL2	2199.13	2589.97	2914.4	3017.33	2702.89	0.272578	0.0920222	0.234147	2394.55	2878.21
ASXL3	2.39426	15.2651	2.14926	0	5.01279	-1.74294	0.262027	NA	8.82966	2.38735
ATAD1	1577.82	1487.5	1723.71	1697.07	1545.94	0.112723	0.484965	0.67029	1532.66	1655.57
ATAD2	730.25	486.786	1150.93	1044.57	1062.71	0.848845	6.3245e-05	0.00151856	608.518	1086.07
ATAD2B	1862.74	1752.09	1907.47	3000.16	1877.79	0.296429	0.120571	0.279608	1807.41	2261.81
ATAD3A	25.1397	33.9224	24.7165	28.6184	38.0972	0.0559727	0.902413	0.951573	29.5311	30.4774
ATAD3B	52.6738	47.4913	79.5226	43.8816	117.299	0.663868	0.149249	0.319988	50.0825	80.2345
ATAD3C	9.57705	13.5689	31.1643	7.63158	8.02046	0.196787	0.776992	0.878906	11.573	15.6054
ATAD5	336.394	220.495	380.419	493.191	331.846	0.538078	0.0442032	0.143283	278.445	401.819
ATAT1	332.802	378.234	367.523	304.309	323.826	-0.0999343	0.502522	0.684241	355.518	331.886
ATE1	1127.7	1060.07	1245.5	1460.49	1270.24	0.274598	0.0236228	0.095388	1093.89	1325.41
ATE1-AS1	7.18279	11.8728	4.29852	8.58552	17.0435	0.0917689	0.917778	NA	9.52781	9.97584
ATF1	960.099	771.734	974.689	1444.28	897.289	0.333186	0.0503828	0.156488	865.916	1105.42
ATF2	3917.01	4029.98	3136.84	3257.73	3784.65	-0.226455	0.113454	0.269318	3973.49	3393.08
ATF3	162.81	178.092	79.5226	123.059	2540.48	2.19454	0.0341542	0.120991	170.451	914.354
ATF4	16880.7	16143.7	11788.7	9047.23	13135.5	-0.56522	0.00392755	0.0276516	16512.2	11323.8
ATF5	195.132	149.258	243.941	294.77	615.57	1.12396	0.0153734	0.0711656	172.195	384.76
ATF6	7647.27	13857.3	7414.95	6954.27	6366.24	-0.563882	0.000819917	0.00943868	10752.3	6911.82
ATF6B	3080.22	4274.22	3209.92	2834.18	3166.08	-0.241757	0.329379	0.527994	3677.22	3070.06
ATF7	3037.12	2856.26	3134.7	3327.37	2771.07	0.056599	0.71559	0.838671	2946.69	3077.71
ATF7IP	14089	12081.4	15885.2	10268.3	12975.1	-0.0308911	0.834643	0.914491	13085.2	13042.9
ATF7IP2	536.315	368.058	679.166	560.921	905.309	0.680168	0.0023149	0.0192837	452.186	715.132
ATG10	323.225	340.92	173.015	233.717	321.821	-0.454061	0.0775048	0.209951	332.073	242.851
ATG101	154.43	212.015	183.762	269.013	185.473	0.194169	0.507741	0.688299	183.222	212.749
ATG12	3073.04	3867.15	2896.13	3330.23	2893.38	-0.179834	0.0724708	0.200861	3470.09	3039.91
ATG13	3193.95	4226.73	3125.02	3317.83	3477.87	-0.151264	0.0981112	0.244289	3710.34	3306.91
ATG14	1610.14	1572.3	2172.9	1837.3	2536.47	0.449303	0.000368483	0.00536937	1591.22	2182.22
ATG16L1	2093.78	1808.06	2658.63	1541.58	1855.73	0.01626	0.893901	0.948011	1950.92	2018.65
ATG16L2	20405.1	30284.2	15366.1	8669.47	10919.9	-1.11411	0.00107677	0.0113918	25344.6	11651.8
ATG2A	1563.45	5191.82	4742.34	625.789	2163.52	-0.700088	0.141077	0.309104	3377.64	2510.55
ATG2B	5275.76	6005.95	6199.54	4971.02	3516.97	-0.200688	0.309726	0.508662	5640.86	4895.84
ATG3	7091.8	7082.99	4251.24	5100.75	8382.38	-0.291517	0.217614	0.40813	7087.4	5911.46
ATG4A	537.512	500.355	428.777	695.427	617.575	0.144038	0.576297	0.739787	518.933	580.593
ATG4B	875.103	1233.08	1055.29	1021.68	781.995	-0.148002	0.517172	0.69579	1054.09	952.986
ATG4C	393.856	186.573	266.508	735.493	237.606	0.408472	0.164181	0.341569	290.215	413.202
ATG4D	245.412	676.751	511.524	136.414	560.43	-0.237335	0.51011	0.690198	461.081	402.789
ATG5	1404.23	1345.02	1150.93	1243.95	1322.37	-0.153339	0.23901	0.432937	1374.63	1239.08
ATG7	2546.3	3266.72	1625.91	2544.18	2016.14	-0.502894	0.00387026	0.0273835	2906.51	2062.08
ATG9A	4211.51	4969.63	4134.1	1944.14	1368.49	-0.930825	0.00378102	0.0269835	4590.57	2482.25
ATG9B	17.957	20.3534	31.1643	18.125	48.1227	0.710256	0.263439	0.460116	19.1552	32.4707
ATHL1	9474.09	16618.6	7827.6	3232.93	7999.4	-1.11809	0.0109837	0.0568739	13046.3	6353.31
ATIC	762.572	400.284	690.987	907.204	770.967	0.498869	0.0409014	0.136387	581.428	789.719
ATL1	130.487	71.237	59.1046	98.2565	55.1406	-0.479867	0.295397	0.494135	100.862	70.8339
ATL2	2045.9	2479.72	2166.45	1521.55	1329.39	-0.445664	0.0122804	0.061682	2262.81	1672.46
ATL3	1687.95	1555.34	1712.96	3381.74	1867.76	0.45231	0.000754726	0.00888389	1621.65	2320.82
ATM	14230.3	13097.4	23256.1	20838	17465.5	0.571006	0.000545595	0.00701754	13663.9	20519.9
ATMIN	1668.8	1222.9	1793.56	1991.84	1725.4	0.35337	0.0322082	0.116109	1445.85	1836.93
ATN1	318.437	169.612	536.24	338.651	556.419	0.997767	0.0130355	0.0638734	244.024	477.104
ATOH7	4.78852	1.69612	3.22389	0.953947	2.00511	-0.605988	0.681387	NA	3.24232	2.06098
ATOH8	143.656	161.131	269.732	62.9605	43.11	-0.34066	0.679444	0.814263	152.393	125.268
ATOX1	265.763	371.45	363.225	540.888	542.383	0.599293	0.00189064	0.0166349	318.606	482.165
ATP10A	302.874	251.025	539.464	694.473	952.429	1.4017	1.47653e-05	0.000534653	276.95	728.789
ATP10B	2.39426	0	8.59704	2.86184	3.00767	1.81952	0.185001	NA	1.19713	4.82218
ATP10D	1177.98	583.465	961.794	1849.7	1243.17	0.596407	0.0240134	0.0963178	880.721	1351.56
ATP11A	7115.75	12071.3	8910.83	8405.23	6484.54	-0.225557	0.273228	0.470814	9593.51	7933.53
ATP11A-AS1	77.8135	123.817	54.8061	14.3092	65.1662	-1.29876	0.0138313	0.0663903	100.815	44.7605
ATP11AUN	17.957	6.78447	9.67167	6.67763	12.0307	-0.479743	0.569232	NA	12.3707	9.45999
ATP11B	14784.6	28691.5	17367.1	19611.2	12552	-0.298093	0.207604	0.396749	21738.1	16510.1
ATP11C	1288.11	1180.5	1505.56	1770.53	1550.96	0.374731	0.0139097	0.0666327	1234.31	1609.01
ATP13A1	529.132	420.637	612.539	599.079	746.905	0.476803	0.110552	0.264835	474.885	652.841
ATP13A2	148.444	128.905	125.732	137.368	176.45	0.113007	0.759643	0.866719	138.675	146.517
ATP13A3	2843.19	2557.75	3241.08	4337.6	3697.43	0.464048	0.00945961	0.0513031	2700.47	3758.7
ATP13A4	195.132	76.3253	111.762	103.98	156.399	-0.00165215	0.997724	0.999271	135.729	124.047
ATP13A4-AS1	1.19713	0	2.14926	0	4.01023	1.06019	0.620318	NA	0.598565	2.05316
ATP13A5	8.37992	25.4418	0	0.953947	0	-5.63432	9.51384e-05	NA	16.9108	0.317982
ATP13A5-AS1	2.39426	6.78447	0	3.81579	0	-2.17842	0.131528	NA	4.58937	1.27193
ATP1A1	3542.31	4214.85	4018.04	5779.01	6950.73	0.522071	0.0169217	0.075987	3878.58	5582.59
ATP1A1-AS1	44.2938	86.502	46.2091	55.3289	116.297	0.18885	0.658066	0.798593	65.3979	72.6115
ATP1A2	0	0	0	0	0	0	1	NA	0	0
ATP1A3	43.0967	35.6185	59.1046	37.2039	49.1253	0.308195	0.542716	0.714162	39.3576	48.478
ATP1A4	3.59139	40.7068	23.6419	83.9473	43.11	1.00476	0.589522	0.749109	22.1491	50.233
ATP1B1	93.3762	33.9224	31.1643	40.0658	71.1816	-0.349266	0.627325	0.776457	63.6493	47.4705
ATP1B2	5.98565	3.39224	7.52241	5.72368	10.0256	0.479243	0.694745	NA	4.68895	7.75722
ATP1B3	1689.15	1334.85	2185.8	1750.49	1605.09	0.30779	0.329761	0.528392	1512	1847.13
ATP2A1	190.344	150.955	96.7167	74.4079	100.256	-0.949453	5.07473e-05	0.00129588	170.649	90.4601
ATP2A2	4662.83	3360.01	5200.13	5998.42	7548.25	0.640639	0.00213362	0.0181929	4011.42	6248.94
ATP2A3	4668.81	6670.83	4476.91	2583.29	2914.43	-0.78711	0.00787764	0.0448977	5669.82	3324.88
ATP2B1	9020.38	11874.5	11931.6	4522.66	13167.6	-0.17007	0.553948	0.722936	10447.5	9873.95
ATP2B2	13.1684	8.48059	19.3433	6.67763	25.0639	0.459034	0.473957	0.661606	10.8245	17.0283
ATP2B4	8893.49	13046.5	13485.5	16013.9	10081.7	0.289355	0.195263	0.381546	10970	13193.7
ATP2C1	2618.13	2037.04	2810.16	3272.04	2472.31	0.290465	0.0345628	0.121983	2327.58	2851.5
ATP2C2	148.444	571.592	213.851	104.934	113.289	-1.21685	0.0204674	0.0864284	360.018	144.025
ATP5A1	5918.62	3850.19	5000.25	8383.29	5737.64	0.368171	0.0537381	0.163795	4884.4	6373.72
ATP5B	11730.7	8706.17	9495.43	12310.7	9260.62	0.00701122	0.967104	0.983367	10218.4	10355.6
ATP5C1	2807.27	2282.98	2028.9	3194.77	2561.53	0.00759222	0.962502	0.980709	2545.12	2595.07
ATP5D	16.7598	20.3534	6.44778	10.4934	8.02046	-1.23156	0.117194	0.274804	18.5566	8.32055
ATP5E	3.59139	0	1.07463	0.953947	0	-1.39502	0.463216	NA	1.7957	0.676192
ATP5F1	4370.73	5508.99	3702.1	4867.99	2945.51	-0.370859	0.0489952	0.153578	4939.86	3838.53
ATP5G1	703.913	366.362	418.031	818.486	753.923	0.310262	0.289316	0.487552	535.137	663.48
ATP5G2	4808.87	3765.38	4277.03	6783.52	4683.95	0.268694	0.129221	0.292615	4287.13	5248.16
ATP5G3	1333.6	1041.42	821.017	1711.38	1652.21	0.200889	0.3924	0.588412	1187.51	1394.87
ATP5H	2272.15	2106.58	1433.56	3445.66	2506.39	0.0963691	0.631058	0.779614	2189.37	2461.87
ATP5I	616.522	881.981	504.001	533.256	660.685	-0.393735	0.183392	0.367315	749.252	565.981
ATP5J	1614.93	1577.39	889.794	1774.34	1523.89	-0.230603	0.290726	0.488721	1596.16	1396.01
ATP5J2	132.882	132.297	79.5226	142.138	105.269	-0.320435	0.231865	0.425443	132.589	108.976
ATP5L	5797.71	6033.09	3935.29	5940.23	4908.52	-0.280129	0.0639976	0.184452	5915.4	4928.01
ATP5L2	0	5.08835	4.29852	1.90789	3.00767	0.480089	0.692421	NA	2.54418	3.07136
ATP5O	2571.44	2189.69	1696.84	2961.05	2518.42	-0.0212212	0.899434	0.950467	2380.56	2392.11
ATP5S	234.638	249.329	353.553	358.684	255.652	0.410102	0.0490643	0.153733	241.984	322.63
ATP5SL	260.975	239.153	235.344	330.066	240.614	0.086007	0.642895	0.787496	250.064	268.674
ATP6AP1	6347.19	9579.68	4291	4510.26	3774.63	-0.890651	1.80097e-05	0.000604656	7963.43	4191.96
ATP6AP1L	140.064	74.6292	67.7017	82.9934	201.514	0.183898	0.69945	0.827736	107.347	117.403
ATP6AP2	8458.93	9905.33	5596.67	8204.9	5950.18	-0.494612	0.00145054	0.0140998	9182.13	6583.92
ATP6V0A1	5020.77	4574.43	2981.02	4039.97	3548.05	-0.472417	0.0433144	0.141367	4797.6	3523.01
ATP6V0A2	1539.51	1273.78	2137.44	1772.43	1268.23	0.294343	0.130662	0.29461	1406.65	1726.04
ATP6V0B	16206.8	28903.6	12743	6044.21	9908.27	-1.23786	2.16739e-08	3.90603e-06	22555.2	9565.15
ATP6V0C	890.665	1640.15	620.061	475.066	530.353	-1.18028	1.75039e-07	1.91919e-05	1265.41	541.827
ATP6V0D1	5304.49	9457.56	4080.37	3988.45	4850.37	-0.720536	0.016682	0.0752464	7381.02	4306.4
ATP6V0E1	9544.72	14930.9	6495.06	10055.6	6953.74	-0.633091	0.00010514	0.00218778	12237.8	7834.78
ATP6V0E2	94.5733	132.297	121.433	164.079	110.281	0.0114701	0.979334	0.989702	113.435	131.931
ATP6V0E2-AS1	28.7311	5.08835	27.9404	22.8947	33.0844	0.814724	0.111493	0.266357	16.9097	27.9732
ATP6V1A	12126.9	14023.5	9104.26	11822.3	5525.09	-0.577334	0.039798	0.133703	13075.2	8817.21
ATP6V1B1	9.57705	0	1.07463	0.953947	1.00256	-2.50152	0.150312	NA	4.78852	1.01038
ATP6V1B1-AS1	0	1.69612	3.22389	0	4.01023	1.2045	0.568349	NA	0.848059	2.41137
ATP6V1B2	32301	22090.2	11002.1	23163.7	12925	-0.864481	0.00103651	0.0110611	27195.6	15696.9
ATP6V1C1	6193.96	8857.13	3750.46	7222.33	4943.61	-0.52045	0.0524465	0.160924	7525.54	5305.47
ATP6V1C2	29.9283	47.4913	40.8359	36.25	58.1483	0.244352	0.539733	0.712106	38.7098	45.0781
ATP6V1D	1243.82	2003.12	1124.06	1383.22	1371.5	-0.291672	0.0792877	0.21367	1623.47	1292.93
ATP6V1E1	5967.7	6379.1	4479.06	6338.02	4636.83	-0.274085	0.0646565	0.185838	6173.4	5151.3
ATP6V1E2	94.5733	115.336	132.179	132.599	74.1892	0.0708174	0.854332	0.926776	104.955	112.989
ATP6V1F	906.228	1234.77	560.957	1118.98	1342.42	-0.102653	0.669707	0.807474	1070.5	1007.45
ATP6V1G1	5112.95	5408.92	3676.31	3840.59	5966.22	-0.228004	0.22562	0.418044	5260.93	4494.37
ATP6V1G2	37.1111	37.3146	41.9106	20.9868	66.1688	0.118003	0.818895	0.90535	37.2128	43.0221
ATP6V1H	616.522	725.939	545.912	876.677	650.66	0.0287331	0.821772	0.907491	671.231	691.083
ATP7A	2408.63	2647.64	2369.56	2231.28	1691.31	-0.263796	0.203619	0.391819	2528.13	2097.38
ATP7B	225.061	393.499	61.2539	189.835	144.368	-1.29089	0.00251084	0.0203239	309.28	131.819
ATP8A1	4195.94	2455.98	5715.96	3699.41	3547.05	0.379052	0.133345	0.298206	3325.96	4320.8
ATP8A2	11.9713	5.08835	8.59704	13.3553	10.0256	0.438006	0.555008	0.723597	8.52983	10.6593
ATP8B1	135.276	83.1098	142.926	199.375	200.511	0.734521	0.00694669	0.0412698	109.193	180.937
ATP8B2	2509.19	1351.81	2784.37	3236.74	3825.76	0.833714	0.0025429	0.0204781	1930.5	3282.29
ATP8B3	94.5733	91.5904	153.672	134.507	88.225	0.40601	0.343394	0.542585	93.0819	125.468
ATP8B4	1357.55	1662.2	801.674	1647.47	1435.66	-0.260574	0.528029	0.703815	1509.87	1294.93
ATP8B5P	2.39426	0	1.07463	4.76973	4.01023	0.785806	0.623492	NA	1.19713	3.28486
ATP9A	385.476	2282.98	68.7763	583.816	759.938	-1.50078	0.0180759	0.079254	1334.23	470.843
ATP9B	433.361	515.62	565.255	412.105	581.483	0.125256	0.499303	0.681338	474.491	519.615
ATPAF1	590.186	578.376	661.972	636.283	562.435	0.0863427	0.5955	0.753214	584.281	620.23
ATPAF2	306.466	167.916	270.807	278.553	299.765	0.254092	0.325115	0.52454	237.191	283.041
ATPIF1	962.493	1043.11	766.211	602.894	607.55	-0.617598	0.0038676	0.0273835	1002.8	658.885
ATR	1637.68	1124.53	2156.78	2094.87	2438.22	0.702129	1.05799e-05	0.000418896	1381.1	2229.96
ATRAID	919.397	827.706	789.853	1097.04	941.401	0.0990821	0.505268	0.686542	873.551	942.764
ATRIP	380.688	374.842	304.12	299.539	270.69	-0.374388	0.0850588	0.22324	377.765	291.45
ATRN	994.816	734.419	1055.29	1678.95	1046.67	0.518945	0.000487873	0.00646698	864.617	1260.3
ATRNL1	0	0	0	0.953947	3.00767	2.37095	0.403716	NA	0	1.32054
ATRX	6446.55	7486.67	7546.05	8517.79	7670.57	0.187981	0.181508	0.36476	6966.61	7911.47
ATXN1	5989.25	7730.91	5305.45	4342.37	4225.78	-0.556285	7.82978e-05	0.00176892	6860.08	4624.53
ATXN10	1000.8	549.542	818.868	1200.07	984.511	0.38032	0.043298	0.141343	775.172	1001.15
ATXN1L	7392.28	13843.7	13225.5	4958.62	11502.3	-0.154745	0.287826	0.485773	10618	9895.48
ATXN2	780.529	995.621	824.241	980.657	770.967	-0.0415383	0.752041	0.861744	888.075	858.622
ATXN2L	3198.73	4822.06	4220.07	3039.27	5616.33	0.104267	0.562806	0.729879	4010.4	4291.89
ATXN3	2968.88	3339.66	3463.53	2834.18	3119.96	-0.00872209	0.965594	0.982356	3154.27	3139.22
ATXN3L	0	1.69612	1.07463	4.76973	2.00511	2.11256	0.414172	NA	0.848059	2.61649
ATXN7	10081	14089.7	13561.8	10518.2	15926.6	0.149852	0.464869	0.654574	12085.3	13335.6
ATXN7L1	1664.01	1697.81	1430.33	2030.95	1475.76	-0.0449044	0.794684	0.889101	1680.91	1645.68
ATXN7L2	92.1791	162.827	214.926	103.98	236.604	0.516069	0.0991454	0.245926	127.503	185.17
ATXN7L3	4648.46	9820.52	6013.63	4270.82	4834.33	-0.454153	0.0100239	0.053421	7234.49	5039.59
ATXN7L3B	2661.22	2954.64	4952.97	4145.85	4621.79	0.684866	2.60276e-06	0.000149052	2807.93	4573.54
AUH	584.2	659.79	798.45	496.052	379.969	-0.172883	0.456438	0.647684	621.995	558.157
AUNIP	23.9426	15.2651	21.4926	31.4802	41.1048	0.665819	0.209473	0.399061	19.6038	31.3592
AUP1	4831.62	4508.28	4945.45	3668.88	4484.44	-0.105	0.534742	0.708725	4669.95	4366.26
AURKA	79.0106	81.4137	55.8808	167.895	63.1611	0.0903774	0.81662	0.903839	80.2122	95.6455
AURKAIP1	244.215	432.51	248.239	150.724	256.655	-0.598928	0.0799891	0.214788	338.362	218.539
AURKAPS1	112.53	215.407	220.299	124.013	155.396	0.0331876	0.901618	0.951119	163.969	166.57
AURKB	181.964	150.955	98.8659	137.368	144.368	-0.409643	0.253464	0.449403	166.459	126.868
AURKC	69.4336	39.0107	95.6421	38.1579	64.1637	0.180087	0.654305	0.795663	54.2222	65.9879
AUTS2	377.096	620.779	939.226	302.401	273.698	-0.258009	0.59343	0.751932	498.938	505.109
AVEN	125.699	91.5904	145.075	131.645	131.335	0.328589	0.206053	0.394982	108.645	136.018
AVIL	1551.48	2116.76	1179.94	976.842	1116.85	-0.739583	0.107555	0.259769	1834.12	1091.21
AVL9	6219.1	6295.99	5425.81	5402.2	4347.09	-0.306811	0.0670782	0.190356	6257.54	5058.37
AVPI1	51.4766	30.5301	64.4778	20.0329	37.0946	-0.15894	0.76174	0.868148	41.0034	40.5351
AVPR1A	55.068	27.1379	7.52241	128.783	39.0997	0.0715212	0.888395	0.944669	41.103	58.4683
AVPR1B	7.18279	1.69612	3.22389	0.953947	5.01279	-0.954965	0.612636	NA	4.43945	3.06354
AVPR2	28.7311	47.4913	32.2389	20.0329	65.1662	0.0925114	0.885589	0.943093	38.1112	39.146
AWAT1	2.39426	0	1.07463	7.63158	1.00256	1.57672	0.39912	NA	1.19713	3.23625
AXDND1	3.59139	16.9612	7.52241	5.72368	7.0179	-0.541488	0.526178	NA	10.2763	6.75466
AXIN1	532.723	888.766	900.54	639.144	759.938	0.114505	0.665008	0.803534	710.745	766.541
AXIN2	177.175	96.6787	336.359	110.658	395.008	0.962882	0.0229919	0.093731	136.927	280.675
AXL	7.18279	10.1767	15.0448	68.6842	89.2276	2.6651	0.000903943	0.0100761	8.67975	57.6522
AZI2	2675.59	3968.92	2423.29	4800.26	2456.27	-0.0788086	0.746196	0.858309	3322.25	3226.61
AZIN1	9739.86	16165.7	10284.2	10313.1	9596.48	-0.315499	0.122775	0.28292	12952.8	10064.6
AZIN1-AS1	7.18279	22.0495	18.2687	15.2632	9.02302	0.0810499	0.901173	0.950845	14.6162	14.185
AZIN2	22.7455	35.6185	27.9404	35.296	48.1227	0.314415	0.56081	0.728254	29.182	37.1197
AZU1	31.1254	76.3253	20.418	10.4934	13.0332	-1.67836	0.120515	0.279561	53.7254	14.6482
B2M	773066	1.03599e+06	549879	558185	702543	-0.566037	0.000139311	0.00264437	904530	603536
B3GALNT1	58.6594	71.237	46.2091	93.4868	28.0716	-0.3725	0.482452	0.668112	64.9482	55.9225
B3GALNT2	508.781	337.528	415.882	697.335	536.368	0.383855	0.168086	0.347085	423.154	549.862
B3GALT2	1.19713	15.2651	10.7463	11.4474	18.046	0.788722	0.410264	0.6061	8.2311	13.4132
B3GALT4	68.2365	122.121	61.2539	137.368	75.1918	-0.112559	0.681598	0.815862	95.1785	91.2714
B3GALT6	71.8279	72.9331	83.8211	126.875	73.1867	0.356185	0.246568	0.441333	72.3805	94.6276
B3GAT1	84.9963	186.573	412.658	136.414	61.156	0.0778452	0.91815	0.95877	135.785	203.409
B3GAT3	354.351	296.821	394.389	235.625	338.864	-0.035822	0.876238	0.938232	325.586	322.959
B3GLCT	214.286	188.269	352.479	240.395	274.701	0.514906	0.055836	0.168356	201.278	289.191
B3GNT2	5794.11	3834.92	2619.95	3437.07	3125.97	-0.692689	0.0126133	0.0626431	4814.52	3061
B3GNT3	0	0	0	0	5.01279	2.37869	0.244913	NA	0	1.67093
B3GNT4	5.98565	3.39224	10.7463	1.90789	13.0332	0.480895	0.589241	NA	4.68895	8.56248
B3GNT5	5212.31	10919.6	11865	3428.49	14474.9	0.219371	0.652811	0.794429	8065.96	9922.8
B3GNT7	8.37992	66.1486	280.478	14.3092	37.0946	0.433951	0.649654	0.792211	37.2643	110.627
B3GNT8	93.3762	262.898	63.4032	111.612	75.1918	-0.947711	0.0542162	0.164644	178.137	83.4022
B3GNT9	44.2938	40.7068	31.1643	26.7105	25.0639	-0.667482	0.124049	0.284957	42.5003	27.6462
B3GNTL1	514.766	1051.59	507.225	435.954	511.304	-0.63653	0.117863	0.275639	783.18	484.828
B4GALNT3	37.1111	223.888	61.2539	23.8487	36.0921	-1.78634	0.0232745	0.0943755	130.499	40.3982
B4GALNT4	3.59139	3.39224	11.8209	5.72368	5.01279	1.06776	0.454367	NA	3.49181	7.51913
B4GALT1	12286.2	14315.2	12220.7	9350.59	9296.71	-0.370074	0.0250289	0.0982791	13300.7	10289.3
B4GALT1-AS1	88.5877	101.767	42.9852	20.9868	20.0511	-1.80973	6.17191e-05	0.00149798	95.1774	28.0077
B4GALT2	45.491	25.4418	40.8359	29.5724	46.1176	0.0835577	0.890894	0.946106	35.4664	38.842
B4GALT3	1301.28	1658.8	1177.79	1036.94	1750.46	-0.161059	0.544759	0.715762	1480.04	1321.73
B4GALT4	2104.56	2228.7	2522.16	1822.04	731.867	-0.343108	0.386988	0.582805	2166.63	1692.02
B4GALT4-AS1	46.6881	37.3146	47.2837	13.3553	8.02046	-1.07578	0.12891	0.292113	42.0014	22.8865
B4GALT5	14480.5	32395.9	15803.5	35293.2	17332.2	-0.0199581	0.955723	0.977976	23438.2	22809.6
B4GALT6	204.709	242.545	128.956	290.954	129.33	-0.467195	0.174744	0.355681	223.627	183.08
B4GALT7	80.2078	89.8943	107.463	90.625	134.343	0.377592	0.285937	0.483776	85.051	110.81
B4GAT1	19.1541	16.9612	18.2687	31.4802	14.0358	0.238118	0.596728	0.754192	18.0576	21.2616
B9D1	26.3369	10.1767	13.9702	20.9868	12.0307	-0.134435	0.873856	0.936927	18.2568	15.6626
B9D2	71.8279	157.739	91.3435	62.9605	111.284	-0.311753	0.34357	0.542717	114.783	88.5293
BAALC	8.37992	22.0495	16.1194	6.67763	12.0307	-0.395631	0.550224	0.720235	15.2147	11.6093
BAALC-AS1	0	3.39224	1.07463	0	2.00511	-0.320754	0.906294	NA	1.69612	1.02658
BAAT	1.19713	3.39224	4.29852	1.90789	2.00511	0.182521	0.888939	NA	2.29468	2.73718
BABAM1	837.992	819.225	1067.11	887.171	1021.61	0.262035	0.170859	0.350733	828.608	991.961
BACE1	569.834	201.838	401.912	606.71	380.972	0.330631	0.110226	0.264297	385.836	463.198
BACE1-AS	39.5053	20.3534	25.7911	47.6973	11.0281	-0.147457	0.726235	0.845459	29.9294	28.1722
BACE2	107.742	23.7457	311.643	89.671	46.1176	1.04003	0.208867	0.398212	65.7437	149.144
BACH1	17403.9	17648.1	9597.52	21362.7	24613.8	0.0223966	0.936433	0.967804	17526	18524.7
BACH1-IT2	108.939	213.711	144	112.566	184.471	-0.0596918	0.836168	0.915602	161.325	147.012
BACH2	1204.31	471.521	2791.89	905.296	3014.69	1.36923	0.0149114	0.0698733	837.917	2237.29
BAD	40.7025	72.9331	38.6867	35.296	64.1637	-0.271246	0.540747	0.713068	56.8178	46.0488
BAG1	1964.49	2347.43	1683.94	1282.1	2106.37	-0.358125	0.0806025	0.215801	2155.96	1690.81
BAG2	64.6451	49.1874	122.508	101.118	69.1765	0.78499	0.00792085	0.0450948	56.9162	97.6009
BAG3	220.272	78.0214	156.896	138.322	336.859	0.579179	0.158996	0.334302	149.147	210.693
BAG4	1881.89	1156.75	1279.88	1219.14	1403.58	-0.259284	0.268661	0.465658	1519.32	1300.87
BAG5	2458.91	2818.95	3490.4	2665.33	3141.01	0.223552	0.116997	0.274568	2638.93	3098.91
BAG6	5254.21	7457.83	5680.49	4706.77	5555.17	-0.238648	0.0540056	0.164227	6356.02	5314.15
BAHCC1	58.6594	45.7952	29.015	98.2565	49.1253	-0.0144173	0.967999	0.983747	52.2273	58.7989
BAHD1	784.121	805.656	1002.63	1072.24	990.527	0.35668	0.0784733	0.212025	794.888	1021.8
BAIAP2	220.272	435.902	214.926	98.2565	181.463	-1.05797	0.016434	0.0744708	328.087	164.882
BAIAP2-AS1	474.064	220.495	410.509	600.987	147.376	0.196296	0.629759	0.778644	347.28	386.29
BAIAP2L1	527.935	383.323	329.911	271.875	363.928	-0.579448	0.102118	0.25084	455.629	321.905
BAIAP2L2	41.8996	30.5301	50.5076	39.1118	20.0511	0.0129295	0.979884	0.989874	36.2149	36.5569
BAIAP3	666.802	683.536	256.837	27.6645	123.315	-2.81414	4.98558e-10	1.98938e-07	675.169	135.939
BAK1	2727.06	1645.23	1784.96	1864.01	1281.27	-0.419564	0.188231	0.374052	2186.15	1643.41
BAMBI	35.9139	42.403	16.1194	109.704	59.1509	0.550135	0.505788	0.686542	39.1584	61.6581
BANF1	657.225	656.398	372.897	1060.79	811.069	0.0906016	0.67522	0.811496	656.811	748.251
BANK1	2071.04	373.146	3175.53	859.506	1403.58	0.524034	0.456107	0.647586	1222.09	1812.87
BANP	847.569	1187.28	803.823	541.842	793.023	-0.514864	0.0052124	0.0340522	1017.43	712.896
BAP1	2349.97	5690.48	4039.53	2162.6	4287.94	-0.158964	0.520367	0.698144	4020.22	3496.69
BARD1	389.068	266.291	529.793	367.27	537.371	0.517266	0.0229595	0.0936721	327.679	478.144
BARX2	0	0	1.07463	0.953947	0	1.3002	0.61627	NA	0	0.676192
BASP1	17952.2	41032.5	16466.6	15238.3	15727.1	-0.764785	0.0315791	0.11464	29492.3	15810.7
BATF	274.143	407.068	156.896	217.5	898.291	0.344293	0.539611	0.712101	340.606	424.229
BATF2	239.426	278.163	270.807	1325.99	1643.19	1.97487	0.00756797	0.0437853	258.795	1079.99
BATF3	10.7742	45.7952	9.67167	9.53947	63.1611	0.0605959	0.943129	0.971325	28.2847	27.4574
BAX	1070.24	1273.78	962.868	967.302	1098.8	-0.205432	0.361675	0.560235	1172.01	1009.66
BAZ1A	14795.3	22526.1	15300.6	20065.3	22885.4	0.0887172	0.68199	0.816046	18660.7	19417.1
BAZ1B	2683.97	1877.6	2811.23	4260.33	3189.13	0.580304	6.02515e-05	0.00146918	2280.79	3420.23
BAZ2A	23553.6	29939.9	30692.5	20265.6	30478.7	0.00667271	0.962248	0.980709	26746.7	27145.6
BAZ2B	12973.3	15141.2	7921.1	9831.38	10643.1	-0.568152	0.090272	0.23127	14057.3	9465.21
BBC3	122.107	108.552	17.1941	34.3421	50.1279	-1.79353	0.00208024	0.0179209	115.329	33.888
BBIP1	1415.01	2014.99	1520.6	1234.41	1325.38	-0.311126	0.0610295	0.17888	1715	1360.13
BBS1	293.297	220.495	276.18	317.664	293.749	0.202062	0.359264	0.557713	256.896	295.864
BBS10	743.418	459.648	421.255	802.269	363.928	-0.226417	0.434583	0.627251	601.533	529.151
BBS12	34.7168	32.2262	36.5374	132.599	76.1944	1.16952	0.00395434	0.0278027	33.4715	81.7768
BBS2	1285.72	1083.82	1548.54	1525.36	807.059	0.121153	0.662174	0.801623	1184.77	1293.65
BBS4	1239.03	1046.5	1220.78	823.256	904.307	-0.259457	0.256248	0.452191	1142.77	982.781
BBS5	29.9283	32.2262	35.4628	25.7566	47.1202	0.214519	0.618306	0.76946	31.0773	36.1132
BBS7	369.913	254.418	270.807	465.526	295.754	0.119337	0.558804	0.726672	312.166	344.029
BBS9	532.723	271.379	444.897	410.197	450.148	0.124459	0.569035	0.73516	402.051	435.081
BBX	3994.83	3405.81	5640.73	4095.29	7166.28	0.579184	0.00375482	0.0268724	3700.32	5634.1
BCAP29	1015.17	888.766	940.301	1139.97	747.908	-0.0223566	0.905946	0.953297	951.966	942.725
BCAP31	4527.55	8187.16	4351.18	4043.78	3180.11	-0.669718	0.00163969	0.0152846	6357.36	3858.36
BCAR3	26.3369	16.9612	11.8209	21.9408	33.0844	0.0586508	0.920304	0.959698	21.649	22.282
BCAR4	0	1.69612	1.07463	0	3.00767	0.696227	0.75008	NA	0.848059	1.36077
BCAS1	29.9283	61.0603	49.433	62.0066	44.1125	0.205552	0.711434	0.835674	45.4943	51.8507
BCAS2	1149.25	1596.05	1449.68	1087.5	1806.61	0.0744326	0.691774	0.822689	1372.65	1447.93
BCAS3	1349.17	1736.83	1177.79	932.006	1059.7	-0.537093	0.00337952	0.0249236	1543	1056.5
BCAS4	37.1111	28.834	165.493	69.6381	72.1841	1.57162	0.00136583	0.0135195	32.9725	102.438
BCAT1	2062.66	4735.56	2659.71	1910.76	113.289	-0.959626	0.199317	0.386865	3399.11	1561.25
BCAT2	92.1791	54.2758	105.314	109.704	153.391	0.762709	0.00535418	0.0345608	73.2274	122.803
BCCIP	778.135	600.426	846.808	1031.22	1248.18	0.600856	0.00173175	0.0159124	689.28	1042.07
BCDIN3D	112.53	78.0214	80.5972	131.645	123.315	0.214956	0.526298	0.702235	95.2759	111.852
BCDIN3D-AS1	17.957	13.5689	47.2837	38.1579	42.1074	1.41685	0.000892988	0.0100188	15.763	42.5163
BCKDHA	584.2	792.087	334.21	538.98	387.99	-0.716256	0.0350971	0.123162	688.144	420.393
BCKDHB	175.978	115.336	186.986	140.23	213.545	0.330491	0.199704	0.387185	145.657	180.253
BCKDK	826.02	1353.5	707.106	982.565	601.534	-0.504041	0.110476	0.264733	1089.76	763.735
BCL10	1589.79	3288.77	1798.93	1529.18	3212.19	-0.0957607	0.701335	0.828904	2439.28	2180.1
BCL11A	644.056	103.463	1155.23	292.862	590.506	0.717095	0.142979	0.31177	373.76	679.532
BCL11B	3410.63	2113.36	3755.83	2535.59	6016.35	0.590453	0.162921	0.339867	2761.99	4102.59
BCL2	2122.51	1058.38	5364.55	2104.41	3190.14	1.11854	2.88324e-07	2.87939e-05	1590.45	3553.03
BCL2A1	39789	80389.2	31096.6	26763	49328.8	-0.675691	0.0626158	0.181739	60089.1	35729.5
BCL2L1	933.762	1294.14	529.793	856.644	976.491	-0.501828	0.117697	0.275551	1113.95	787.643
BCL2L10	7.18279	3.39224	2.14926	1.90789	12.0307	-0.0722298	0.954467	NA	5.28751	5.36261
BCL2L11	4775.36	3387.15	5123.84	3015.43	3374.61	-0.170501	0.493087	0.676447	4081.25	3837.96
BCL2L12	1027.14	834.49	1563.59	1172.4	1279.26	0.511505	0.00145911	0.0141393	930.814	1338.42
BCL2L13	1945.34	1465.45	1188.54	2092.01	1604.09	-0.101539	0.535121	0.708866	1705.39	1628.21
BCL2L14	5.98565	0	8.59704	8.58552	27.069	2.13526	0.0313713	0.114206	2.99283	14.7505
BCL2L15	216.681	205.23	199.881	167.895	103.263	-0.424477	0.51137	0.691239	210.956	157.013
BCL2L2	984.042	776.822	723.226	1343.16	884.255	0.116398	0.494444	0.67742	880.432	983.546
BCL3	2395.46	10030.8	3306.64	1987.07	9345.84	-0.144065	0.704705	0.831382	6213.15	4879.85
BCL6	77601.6	122967	87723.1	51848.9	67421	-0.545062	0.0863666	0.225165	100284	68997.7
BCL6B	3.59139	1.69612	5.37315	4.76973	2.00511	0.667818	0.643364	NA	2.64376	4.04933
BCL7A	181.964	22.0495	4.29852	94.4407	179.458	0.16445	0.868692	0.934684	102.007	92.7323
BCL7B	671.59	1594.35	816.719	807.039	1312.35	-0.14297	0.602911	0.758721	1132.97	978.702
BCL7C	17.957	11.8728	13.9702	21.9408	9.02302	-0.0315164	0.959524	0.979962	14.9149	14.978
BCL9	396.25	681.84	543.763	361.546	540.378	-0.13673	0.525906	0.702118	539.045	481.896
BCL9L	638.071	520.708	1354.03	881.447	1235.15	0.979726	0.0035578	0.0258973	579.39	1156.88
BCLAF1	16743.1	39896.1	27877	14572.5	34460.9	-0.116582	0.601098	0.75724	28319.6	25636.8
BCO2	155.627	101.767	98.8659	116.382	104.266	-0.2815	0.37792	0.574502	128.697	106.504
BCOR	996.013	359.577	434.15	1190.53	1105.82	0.443391	0.249617	0.444542	677.795	910.166
BCORL1	627.297	1314.49	654.45	743.125	559.427	-0.491909	0.0663709	0.18885	970.894	652.334
BCORP1	0	0	352.479	0	0	16.8894	0.00351809	0.0257038	0	117.493
BCR	780.529	1724.95	1380.9	893.848	1246.18	-0.130339	0.726455	0.845499	1252.74	1173.64
BCRP3	15.5627	10.1767	3.22389	7.63158	15.0384	-0.520195	0.544993	NA	12.8697	8.63127
BCS1L	367.519	212.015	313.792	338.651	397.013	0.305858	0.100348	0.247902	289.767	349.819
BDH1	180.767	105.159	225.672	148.816	184.471	0.406628	0.185898	0.370731	142.963	186.32
BDH2	250.2	174.7	343.882	624.835	293.749	0.944614	0.000678646	0.00828699	212.45	420.822
BDKRB2	10.7742	0	1.07463	0	0	-3.31518	0.336505	NA	5.38709	0.35821
BDNF	7.18279	3.39224	5.37315	10.4934	6.01534	0.459965	0.648002	NA	5.28751	7.29397
BDNF-AS	23.9426	18.6573	10.7463	21.9408	16.0409	-0.363965	0.464212	0.654001	21.3	16.2427
BDP1	3044.3	2216.83	4530.64	3967.47	3581.13	0.621925	9.02723e-06	0.000374439	2630.57	4026.41
BEAN1	258.58	432.51	301.971	187.928	114.292	-0.726423	0.178133	0.359795	345.545	201.397
BEAN1-AS1	197.527	240.849	153.672	107.796	72.1841	-0.993863	0.0449077	0.144729	219.188	111.217
BECN1	2294.9	2778.24	2496.37	2753.09	2405.13	0.0174285	0.863808	0.932308	2536.57	2551.53
BEGAIN	26.3369	49.1874	21.4926	20.0329	11.0281	-1.10499	0.0701576	0.196724	37.7622	17.5179
BEND2	620.114	883.678	180.538	127.829	230.588	-2.11125	0.000772605	0.00903077	751.896	179.652
BEND3	34.7168	20.3534	40.8359	50.5592	37.0946	0.66125	0.239821	0.433747	27.5351	42.8299
BEND3P3	360.336	315.478	182.687	375.855	557.422	0.082292	0.880374	0.940991	337.907	371.988
BEND4	245.412	33.9224	294.449	68.6842	175.448	0.0766059	0.923584	0.961141	139.667	179.527
BEND5	44.2938	13.5689	27.9404	17.171	32.0818	-0.0095341	0.985256	0.992692	28.9314	25.7311
BEND6	0	0	0	0	4.01023	2.22624	0.306043	NA	0	1.33674
BEND7	743.418	1545.16	253.613	435.954	218.557	-1.88518	0.00280672	0.0219839	1144.29	302.708
BEST1	4098.98	5663.34	3662.34	4432.99	1993.08	-0.511779	0.177642	0.359062	4881.16	3362.8
BEST2	3.59139	8.48059	2.14926	2.86184	2.00511	-1.2948	0.270553	NA	6.03599	2.33874
BEST3	8.37992	10.1767	8.59704	4.76973	3.00767	-0.789944	0.488215	NA	9.27831	5.45815
BEST4	19.1541	28.834	13.9702	12.4013	14.0358	-0.810986	0.213554	0.404094	23.9941	13.4691
BET1	270.552	162.827	133.254	607.664	218.557	0.338363	0.373849	0.57097	216.689	319.825
BET1L	2224.27	1479.02	2539.35	1490.07	1314.35	-0.07087	0.802412	0.894682	1851.64	1781.26
BEX1	10.7742	81.4137	3.22389	11.4474	5.01279	-2.79141	0.0137826	0.0662267	46.0939	6.56135
BEX2	63.4479	118.728	166.568	76.3158	218.557	0.650821	0.124225	0.285298	91.0881	153.814
BEX4	556.666	385.019	957.495	555.197	1029.63	0.800847	0.0202999	0.0859755	470.842	847.44
BEX5	22.7455	30.5301	9.67167	14.3092	52.133	-0.0766163	0.911445	0.955761	26.6378	25.3713
BFAR	1048.69	1148.27	1470.09	1606.45	1257.21	0.396905	0.0230799	0.0938946	1098.48	1444.58
BFSP1	43.0967	42.403	47.2837	31.4802	14.0358	-0.433948	0.494061	0.677073	42.7498	30.9333
BFSP2	16.7598	0	8.59704	5.72368	14.0358	0.198909	0.832724	NA	8.37992	9.45217
BGLAP	5.98565	5.08835	5.37315	3.81579	3.00767	-0.510909	0.705406	NA	5.537	4.06554
BHLHB9	58.6594	62.7564	88.1196	74.4079	76.1944	0.375404	0.371862	0.568934	60.7079	79.574
BHLHE40	2861.14	2786.72	2142.81	1143.78	3561.08	-0.364875	0.402308	0.598764	2823.93	2282.56
BHLHE40-AS1	5.98565	18.6573	23.6419	12.4013	20.0511	0.584023	0.405139	0.60145	12.3215	18.6981
BHLHE41	144.853	15.2651	33.3135	71.546	42.1074	-0.298912	0.795319	0.889407	80.059	48.989
BHMT	2.39426	0	1.07463	0.953947	0	-0.923496	0.66895	NA	1.19713	0.676192
BHMT2	7.18279	5.08835	1.07463	0.953947	2.00511	-2.23446	0.169094	NA	6.13557	1.34456
BICC1	1.19713	3.39224	0	1.90789	6.01534	0.298154	0.840213	NA	2.29468	2.64108
BICD1	187.95	133.993	373.971	112.566	143.366	0.199377	0.441694	0.634477	160.971	209.968
BICD2	3924.2	4116.48	3221.74	3748.06	2172.54	-0.399146	0.0815695	0.217283	4020.34	3047.45
BID	2044.7	2628.98	1131.59	1198.16	2392.1	-0.568987	0.0741105	0.203642	2336.84	1573.95
BIK	37.1111	40.7068	26.8657	29.5724	64.1637	0.030955	0.941893	0.970681	38.9089	40.2006
BIN1	330.408	315.478	669.494	427.368	667.703	0.818709	0.00566451	0.0357656	322.943	588.189
BIN2	34904.7	51723.1	36230.1	31592.8	25181.2	-0.450106	0.011388	0.0582934	43313.9	31001.4
BIN3	1116.92	2213.43	1487.29	1263.03	1746.45	-0.0813699	0.616995	0.768791	1665.18	1498.92
BIN3-IT1	28.7311	44.0991	35.4628	2.86184	55.1406	-0.586629	0.267787	0.464656	36.4151	31.1551
BIRC2	4865.14	5505.6	3307.71	5924.96	6806.36	0.0282958	0.905437	0.953208	5185.37	5346.35
BIRC3	6878.71	3655.13	5116.31	5474.7	12384.6	0.565591	0.140057	0.307557	5266.92	7658.53
BIRC5	100.559	76.3253	16.1194	98.2565	135.345	-0.149751	0.832195	0.913358	88.4422	83.2404
BIRC6	6419.02	6723.41	8971.01	11167.9	7399.88	0.475607	0.00992117	0.0530328	6571.21	9179.58
BIRC6-AS2	38.3082	25.4418	22.5672	14.3092	31.0793	-0.53059	0.230347	0.423753	31.875	22.6519
BISPR	533.92	456.256	710.33	1197.2	1856.74	1.31696	0.000581948	0.00737025	495.088	1254.76
BIVM	193.935	191.661	182.687	165.987	136.348	-0.278561	0.386123	0.582077	192.798	161.674
BLACAT1	4.78852	1.69612	3.22389	0.953947	3.00767	-0.363355	0.786195	NA	3.24232	2.39517
BLACE	2.39426	0	0	1.90789	0	-1.29153	0.658466	NA	1.19713	0.635965
BLCAP	1857.95	1899.65	1309.97	1575.92	1579.03	-0.337932	0.00307398	0.0233512	1878.8	1488.31
BLK	1326.42	167.916	4591.89	521.809	1009.58	1.04006	0.32937	0.527994	747.168	2041.09
BLM	387.87	188.269	491.106	757.434	274.701	0.84268	0.0306259	0.112438	288.07	507.747
BLMH	691.942	542.758	765.136	872.861	576.47	0.25769	0.277889	0.475554	617.35	738.156
BLNK	720.673	67.8447	709.256	375.855	579.478	0.731922	0.332015	0.530649	394.259	554.863
BLOC1S1	186.752	296.821	182.687	225.131	184.471	-0.255652	0.199929	0.387333	241.787	197.43
BLOC1S2	3591.39	6129.77	3695.65	3210.03	3760.59	-0.402285	0.00424205	0.0291875	4860.58	3555.43
BLOC1S3	937.354	900.639	850.032	579.046	602.537	-0.460382	0.00381073	0.0270968	918.996	677.205
BLOC1S4	159.218	164.523	142.926	145.954	132.338	-0.20743	0.35654	0.555189	161.871	140.406
BLOC1S6	2988.04	4669.41	3963.23	3879.7	6503.59	0.344932	0.145109	0.314554	3828.73	4782.18
BLVRA	739.827	758.165	455.643	1552.07	1906.86	0.730312	0.0477304	0.151093	748.996	1304.86
BLVRB	301.677	247.633	123.582	501.776	222.568	-0.1873	0.602073	0.758004	274.655	282.642
BLZF1	830.809	1155.06	934.928	1248.72	1764.5	0.428427	0.0963583	0.241507	992.933	1316.05
BMF	2760.58	1484.1	3535.53	1811.55	2022.16	0.100823	0.783801	0.882709	2122.34	2456.41
BMI1	1.19713	0	1.07463	0	1.00256	-0.162755	0.946357	NA	0.598565	0.692396
BMP1	41.8996	78.0214	79.5226	65.8223	90.2302	0.485255	0.317528	0.51676	59.9605	78.525
BMP10	15.5627	11.8728	12.8956	2.86184	4.01023	-1.52213	0.0593084	NA	13.7178	6.58921
BMP2	4.78852	23.7457	3.22389	7.63158	69.1765	0.871735	0.48802	0.672379	14.2671	26.6773
BMP2K	2314.05	2444.11	1270.21	2071.97	2622.69	-0.276017	0.297206	0.495858	2379.08	1988.29
BMP3	22.7455	5.08835	7.52241	9.53947	8.02046	-0.416704	0.725321	NA	13.9169	8.36078
BMP6	217.878	396.892	111.762	452.171	208.532	-0.433336	0.41662	0.611628	307.385	257.488
BMP8A	392.659	59.3641	199.881	381.579	361.923	0.767425	0.161182	0.337587	226.012	314.461
BMP8B	101.756	52.5797	107.463	97.3026	138.353	0.620087	0.118961	0.277187	77.1679	114.373
BMPER	3.59139	0	1.07463	0	0	-1.91153	0.449513	NA	1.7957	0.35821
BMPR1A	82.602	66.1486	328.837	124.013	170.435	1.37448	0.000239271	0.0039201	74.3753	207.762
BMPR1B	2.39426	1.69612	5.37315	0.953947	2.00511	0.267239	0.826955	NA	2.04519	2.7774
BMPR2	1347.97	761.557	2273.92	3141.35	2439.22	1.31758	1.02942e-07	1.28098e-05	1054.76	2618.16
BMS1	890.665	569.896	929.555	1503.42	1033.64	0.661778	0.000605522	0.00759519	730.281	1155.54
BMS1P20	1726.26	1816.54	1219.7	1884.05	3912.98	0.406678	0.429878	0.623617	1771.4	2338.91
BMS1P4	405.827	283.252	550.21	582.862	491.253	0.66078	0.00371256	0.0266675	344.54	541.442
BMS1P5	49.0824	33.9224	45.1345	48.6513	51.1304	0.231723	0.544537	0.715718	41.5024	48.3054
BMS1P6	3.59139	3.39224	8.59704	11.4474	4.01023	1.20139	0.214073	0.404371	3.49181	8.01821
BMX	1048.69	2718.88	1725.86	2128.26	806.056	-0.0379666	0.948057	0.973919	1883.78	1553.39
BNC2	134.079	215.407	929.555	318.618	238.609	1.14583	0.0599125	0.176806	174.743	495.594
BNIP1	160.416	225.584	363.225	204.145	539.376	0.897999	0.00584966	0.036526	193	368.915
BNIP2	10066.7	13770.8	10043.5	9004.31	10214.1	-0.269474	0.0106949	0.0558393	11918.7	9753.95
BNIP3	519.555	437.598	438.449	392.072	363.928	-0.262391	0.213374	0.403857	478.577	398.15
BNIP3L	12359.2	20573.9	9527.67	8270.72	8216.96	-0.885227	1.06748e-05	0.000420528	16466.5	8671.78
BNIPL	243.018	283.252	171.941	130.691	166.425	-0.759374	0.000301537	0.00466713	263.135	156.352
BOC	0	5.08835	1.07463	0.953947	8.02046	1.18042	0.493464	NA	2.54418	3.34968
BOD1	140.064	128.905	173.015	254.704	257.657	0.760634	0.000105156	0.00218778	134.485	228.459
BOD1L1	24548.4	34809.4	22826.2	20344.8	14993.2	-0.584716	0.0539243	0.164108	29678.9	19388.1
BOK	5.98565	10.1767	26.8657	12.4013	14.0358	0.727666	0.480984	0.667022	8.08118	17.7676
BOLA1	14.3656	78.0214	8.59704	27.6645	15.0384	-1.57913	0.0252184	0.0987757	46.1935	17.1
BOLA3	37.1111	22.0495	32.2389	26.7105	51.1304	0.316659	0.493044	0.676447	29.5803	36.6933
BOLA3-AS1	104.15	132.297	103.164	88.7171	189.483	0.104348	0.713781	0.837114	118.224	127.122
BOLL	7.18279	3.39224	46.2091	14.3092	15.0384	2.02887	0.00871309	0.0481539	5.28751	25.1855
BOP1	34.7168	57.668	37.612	34.3421	67.1713	-0.010502	0.982575	0.991286	46.1924	46.3752
BORA	246.609	139.082	371.822	479.835	329.841	1.03142	8.77207e-09	1.88407e-06	192.845	393.833
BPGM	806.866	912.512	889.794	733.585	961.452	0.00306571	0.987015	0.993693	859.689	861.61
BPHL	88.5877	40.7068	49.433	70.5921	34.0869	-0.330494	0.309996	0.508732	64.6473	51.3707
BPI	515.963	2366.08	381.494	476.973	774.977	-1.20788	0.311111	0.509548	1441.02	544.481
BPIFB3	2.39426	8.48059	0	0	0	-5.27749	0.0248093	NA	5.43743	0
BPNT1	231.046	162.827	243.941	653.454	243.621	0.821943	0.00187656	0.0165488	196.937	380.339
BPTF	6596.19	7713.95	8966.71	8693.32	7452.01	0.234853	0.0969501	0.242321	7155.07	8370.68
BRAF	938.551	1512.94	1383.05	1118.98	1016.59	-0.014383	0.950228	0.975424	1225.74	1172.87
BRAP	1525.14	1796.19	1470.09	1499.6	1815.63	-0.0526661	0.694093	0.823697	1660.67	1595.11
BRAT1	350.759	335.831	284.777	148.816	504.286	-0.14585	0.754341	0.863307	343.295	312.626
BRCA1	1205.51	1127.92	796.301	1328.85	955.437	-0.211353	0.444406	0.637089	1166.71	1026.86
BRCA2	366.322	279.86	336.359	497.006	768.961	0.713927	0.0580663	0.172854	323.091	534.109
BRCAT107	31.1254	81.4137	0	0	0	-9.80074	0.000137913	0.00263059	56.2695	0
BRCAT54	2.39426	1.69612	7.52241	8.58552	10.0256	2.1959	0.0427758	NA	2.04519	8.71117
BRCC3	924.185	1126.22	881.196	1043.62	808.061	-0.173305	0.325873	0.525016	1025.2	910.959
BRD1	647.648	653.006	877.973	631.513	545.391	0.0685524	0.74792	0.859466	650.327	684.959
BRD2	20439.8	39183.7	20966	17295.1	33467.4	-0.263912	0.179374	0.361585	29811.8	23909.5
BRD3	586.594	853.147	699.584	841.381	400.02	-0.162014	0.568986	0.735157	719.871	646.995
BRD4	2364.33	3918.03	3199.17	2211.25	2231.69	-0.27388	0.19531	0.38159	3141.18	2547.37
BRD7	2241.03	1838.59	3784.85	2977.27	3486.89	0.731726	3.87506e-05	0.00106779	2039.81	3416.34
BRD7P3	59.8565	66.1486	21.4926	8.58552	14.0358	-2.13848	2.55882e-08	4.40876e-06	63.0026	14.7046
BRD8	1974.07	3081.85	2302.93	2524.14	1277.26	-0.283737	0.385535	0.58168	2527.96	2034.78
BRD9	1040.31	919.296	1150.93	979.704	990.527	0.0856354	0.459275	0.650259	979.801	1040.39
BRDT	2.39426	1.69612	2.14926	0.953947	0	-1.06637	0.524261	NA	2.04519	1.0344
BRE	1201.92	1563.82	963.943	909.111	827.11	-0.600452	0.000459805	0.00620421	1382.87	900.055
BRE-AS1	31.1254	191.661	231.045	35.296	148.378	0.308943	0.624988	0.774823	111.393	138.24
BREA2	27.534	15.2651	39.7613	17.171	36.0921	0.529336	0.280863	0.478449	21.3995	31.0081
BRF1	118.516	128.905	190.209	165.987	133.34	0.390425	0.166202	0.344557	123.71	163.179
BRF2	391.462	456.256	276.18	327.204	394.005	-0.342831	0.049905	0.155497	423.859	332.463
BRI3	4064.26	5123.97	2394.28	2269.44	3122.97	-0.827062	0.000110943	0.00227383	4594.12	2595.56
BRI3BP	5.98565	8.48059	12.8956	7.63158	8.02046	0.43222	0.539906	0.712221	7.23312	9.51586
BRICD5	10.7742	16.9612	6.44778	2.86184	4.01023	-1.68946	0.0625347	0.181685	13.8677	4.43995
BRIP1	80.2078	59.3641	108.538	129.737	89.2276	0.650575	0.130841	0.294749	69.786	109.167
BRIX1	344.774	274.771	741.495	489.375	824.102	1.12137	6.47637e-10	2.3078e-07	309.772	684.99
BRK1	4133.69	5091.75	3361.44	4312.79	3742.55	-0.275332	0.133334	0.298206	4612.72	3805.59
BRMS1	1035.52	1826.72	1140.18	829.934	1503.84	-0.271245	0.324544	0.524158	1431.12	1157.98
BRMS1L	148.444	144.17	256.837	143.092	299.765	0.630648	0.0136396	0.0657205	146.307	233.231
BROX	5924.6	6384.19	5518.22	6343.75	5578.23	-0.0825994	0.62385	0.774024	6154.39	5813.4
BRPF1	1403.04	1799.58	1553.91	1102.76	1912.88	-0.0789479	0.685301	0.818529	1601.31	1523.19
BRPF3	1917.8	2947.85	2271.77	2002.33	1814.63	-0.230932	0.244889	0.439532	2432.83	2029.58
BRSK1	33.5197	16.9612	37.612	78.2236	71.1816	1.24654	0.00685386	0.0409066	25.2404	62.3391
BRSK2	5.98565	5.08835	4.29852	0	4.01023	-1.72211	0.254317	NA	5.537	2.76958
BRWD1	6515.98	6048.36	9485.76	7003.88	6552.71	0.280159	0.033159	0.11859	6282.17	7680.78
BRWD1-AS1	1.19713	1.69612	0	4.76973	3.00767	0.705429	0.656186	NA	1.44662	2.59247
BRWD1-IT2	5.98565	1.69612	3.22389	4.76973	1.00256	-0.398043	0.724208	NA	3.84089	2.99873
BRWD3	8423.01	11923.7	10218.7	9659.67	7884.11	-0.105982	0.619521	0.770544	10173.4	9254.14
BSCL2	37.1111	28.834	39.7613	74.4079	39.0997	0.576224	0.225984	0.418521	32.9725	51.0896
BSDC1	2892.27	3846.8	3634.4	3551.54	3002.66	0.0180023	0.913661	0.956869	3369.53	3396.2
BSG	1267.76	2678.17	1112.24	1043.62	1296.31	-0.748136	0.130831	0.294749	1972.97	1150.72
BSN	16.7598	6.78447	8.59704	17.171	16.0409	0.249462	0.704139	0.831006	11.7722	13.9363
BSND	2.39426	20.3534	25.7911	9.53947	4.01023	0.580496	0.631055	NA	11.3738	13.1136
BSPRY	14.3656	10.1767	34.3882	9.53947	14.0358	0.49439	0.438737	0.631411	12.2711	19.3211
BST1	6425	13502.8	4365.15	4435.85	7254.5	-0.805874	0.00342415	0.0251462	9963.9	5351.83
BST2	1078.61	1024.46	801.674	1515.82	4205.73	1.04937	0.0437802	0.142384	1051.54	2174.41
BTAF1	7841.21	7992.11	9292.32	10806.3	7218.41	0.206047	0.372139	0.569244	7916.66	9105.68
BTBD1	2930.58	2338.95	2829.5	3029.74	2800.14	0.130003	0.394778	0.591021	2634.76	2886.46
BTBD10	2266.17	2508.56	2041.8	2431.61	1654.22	-0.224575	0.249231	0.444057	2387.36	2042.54
BTBD11	670.393	142.474	291.225	260.428	305.78	-0.168601	0.718218	0.840291	406.434	285.811
BTBD18	11.9713	8.48059	5.37315	8.58552	8.02046	-0.543393	0.427797	NA	10.226	7.32638
BTBD19	271.749	922.688	334.21	486.513	485.238	-0.343689	0.449259	0.641575	597.219	435.32
BTBD2	158.021	235.76	211.702	161.217	216.552	0.000519276	0.998883	0.999648	196.891	196.49
BTBD3	430.967	123.817	144	311.941	360.921	0.000375266	0.999263	0.999712	277.392	272.287
BTBD6	306.466	413.853	313.792	245.164	245.627	-0.448923	0.0932835	0.23636	360.159	268.194
BTBD7	1672.39	1629.97	1952.6	1907.89	1591.06	0.138849	0.244414	0.439016	1651.18	1817.18
BTBD8	51.4766	47.4913	54.8061	25.7566	34.0869	-0.449141	0.285704	0.483492	49.484	38.2165
BTBD9	922.988	1194.07	1056.36	586.677	906.312	-0.343443	0.0124812	0.0622236	1058.53	849.783
BTD	442.938	478.305	401.912	345.329	313.8	-0.379628	0.0415649	0.137838	460.622	353.68
BTF3	7765.79	6945.6	7610.53	7995.03	8008.43	0.100193	0.460473	0.651309	7355.7	7871.33
BTF3L4	2312.86	1964.1	1640.96	2962.01	1924.91	-0.0173069	0.917778	0.958662	2138.48	2175.96
BTG1	38465	49021.2	48236.9	16955.5	22140.5	-0.695061	0.000151879	0.00281147	43743.1	29110.9
BTG2	35208.8	47219.9	23503.2	26850.7	27968.3	-0.641197	0.0121182	0.0610938	41214.4	26107.4
BTG3	351.956	293.428	563.106	120.197	578.476	0.110149	0.756404	0.864797	322.692	420.593
BTK	7896.28	6989.7	4207.18	8200.13	5312.55	-0.391107	0.02281	0.0932078	7442.99	5906.62
BTLA	2455.32	291.732	1557.14	1199.11	1038.65	0.177216	0.75745	0.86569	1373.52	1264.97
BTN1A1	81.4049	52.5797	22.5672	46.7434	49.1253	-0.78557	0.0866143	0.225538	66.9923	39.4786
BTN2A1	14127.3	14408.5	10160.6	12286.8	13215.7	-0.269699	0.228177	0.421239	14267.9	11887.7
BTN2A2	3347.18	1482.41	959.644	3313.06	2797.13	-0.0683591	0.857583	0.929108	2414.79	2356.61
BTN2A3P	439.347	325.655	102.09	425.46	386.987	-0.425936	0.295946	0.494527	382.501	304.846
BTN3A1	42541.2	25426.5	24294.2	31203.6	31392.1	-0.210363	0.61026	0.763554	33983.9	28963.3
BTN3A2	10812.5	5587.01	8372.44	16625.4	11533.4	0.570206	0.120509	0.279561	8199.75	12177.1
BTN3A3	5699.54	4019.8	3954.64	8203.94	6103.57	0.301588	0.26809	0.464924	4859.67	6087.38
BTNL10	0	1.69612	0	0.953947	4.01023	1.09263	0.593566	NA	0.848059	1.65473
BTNL2	20.3512	0	127.881	8.58552	20.0511	1.95436	0.0846855	0.222745	10.1756	52.1725
BTNL3	1904.64	2864.74	1780.66	0	530.353	-5.82772	0.0658026	0.187968	2384.69	770.338
BTNL8	3221.48	5239.31	1296	1590.23	1292.3	-1.56393	0.00192588	0.0168692	4230.39	1392.84
BTNL9	22.7455	15.2651	8.59704	16.2171	65.1662	0.649082	0.51946	0.697766	19.0053	29.9935
BTRC	508.781	361.273	593.196	642.96	636.624	0.536599	0.000334679	0.00500709	435.027	624.26
BUB1	293.297	84.8059	65.5524	445.493	393.002	0.647596	0.416806	0.611666	189.051	301.349
BUB1B	93.3762	64.4525	63.4032	154.539	153.391	0.602513	0.322085	0.521157	78.9144	123.778
BUB3	1992.03	1819.93	2810.16	2148.29	1977.04	0.267897	0.0816017	0.217325	1905.98	2311.83
BUD13	517.161	566.503	540.539	1176.22	641.637	0.462155	0.00086747	0.0098336	541.832	786.131
BUD31	1977.66	2732.45	1488.36	1413.75	2785.1	-0.312017	0.143393	0.31217	2355.05	1895.74
BVES	7.18279	3.39224	2.14926	23.8487	20.0511	1.57898	0.244897	0.439532	5.28751	15.3497
BYSL	178.373	150.955	203.105	134.507	121.309	-0.11857	0.711225	0.835491	164.664	152.974
BZRAP1	1072.63	1704.6	1883.83	648.684	2152.49	0.0495358	0.896531	0.949143	1388.61	1561.67
BZRAP1-AS1	392.659	590.249	387.941	266.151	723.846	-0.116296	0.692378	0.822819	491.454	459.313
BZW1	6707.52	10027.5	8229.52	5726.54	8179.86	-0.173128	0.227933	0.420988	8367.49	7378.64
BZW2	499.204	344.312	263.284	495.098	424.082	-0.102529	0.714345	0.837588	421.758	394.155
C10orf10	100.559	98.3749	73.0748	714.506	93.2378	0.848459	0.043934	0.142676	99.4669	293.606
C10orf105	3144.86	3629.69	3073.44	2665.33	1620.13	-0.449943	0.124862	0.286592	3387.28	2452.97
C10orf11	87.3906	78.0214	50.5076	134.507	67.1713	-0.120914	0.673294	0.809867	82.706	84.0618
C10orf111	3.59139	10.1767	6.44778	0.953947	45.1151	1.177	0.291459	NA	6.88405	17.5056
C10orf113	0	39.0107	0	0	0	-5.26161	0.393915	NA	19.5054	0
C10orf12	800.881	987.141	1270.21	860.46	793.023	0.124006	0.583618	0.745159	894.011	974.565
C10orf128	4149.26	2540.79	2387.83	1256.35	753.923	-1.2081	0.00514687	0.0337224	3345.02	1466.03
C10orf131	195.132	291.732	136.478	86.8092	85.2174	-1.22205	0.0032436	0.0242058	243.432	102.835
C10orf2	113.727	108.552	130.03	347.237	235.601	1.00091	0.00539656	0.03472	111.14	237.623
C10orf25	153.233	91.5904	76.2987	274.737	191.488	0.444202	0.116754	0.274286	122.412	180.841
C10orf32	521.949	412.157	353.553	491.283	428.092	-0.143188	0.462627	0.653192	467.053	424.309
C10orf35	11.9713	20.3534	9.67167	12.4013	18.046	-0.382191	0.647395	0.791014	16.1624	13.373
C10orf54	35281.8	68753.8	39663.5	19996.6	20095.3	-0.951631	0.0109999	0.0568823	52017.8	26585.1
C10orf55	8.37992	30.5301	2.14926	0	9.02302	-2.55996	0.0627836	0.182057	19.455	3.72409
C10orf67	0	0	1.07463	1.90789	3.00767	2.98778	0.204377	NA	0	1.99673
C10orf76	1253.4	1212.72	1278.81	1792.47	1722.39	0.365233	0.00569312	0.0358523	1233.06	1597.89
C10orf82	0	0	0	0.953947	0	0.300307	0.923867	NA	0	0.317982
C10orf88	237.032	140.778	335.285	393.98	223.57	0.775636	0.000961246	0.0104517	188.905	317.612
C10orf91	7.18279	3.39224	7.52241	4.76973	9.02302	0.494301	0.619283	NA	5.28751	7.10505
C10orf95	4.78852	0	3.22389	1.90789	6.01534	0.421843	0.79896	NA	2.39426	3.71571
C11orf1	90.982	59.3641	99.9406	118.289	137.35	0.692668	0.0181608	0.0794706	75.173	118.527
C11orf16	1.19713	0	0	5.72368	2.00511	1.25189	0.632515	NA	0.598565	2.57627
C11orf21	4019.97	5705.74	4507	5205.69	3524.99	-0.120747	0.545038	0.716016	4862.85	4412.56
C11orf24	126.896	62.7564	123.582	171.71	125.32	0.578812	0.128805	0.292082	94.8261	140.204
C11orf30	2333.21	2791.81	2782.22	2455.46	2155.5	-0.0493679	0.723446	0.843285	2562.51	2464.39
C11orf31	257.383	195.054	196.657	197.467	223.57	-0.131655	0.480748	0.666878	226.218	205.898
C11orf42	23.9426	50.8835	42.9852	59.1447	17.0435	0.167435	0.744916	0.857466	37.4131	39.7245
C11orf45	7.18279	5.08835	2.14926	19.0789	3.00767	0.0289238	0.973249	0.986844	6.13557	8.07862
C11orf49	184.358	249.329	286.926	193.651	279.713	0.219483	0.329295	0.527994	216.844	253.43
C11orf54	2682.77	3281.99	1989.14	2472.63	1499.83	-0.578969	0.00825697	0.0463022	2982.38	1987.2
C11orf57	790.106	551.238	805.972	1155.23	827.11	0.461961	0.000109121	0.00224744	670.672	929.437
C11orf58	4290.52	4426.87	4401.68	5872.5	6108.58	0.320119	0.00517191	0.0338299	4358.69	5460.92
C11orf63	83.7992	47.4913	101.015	47.6973	74.1892	0.166551	0.61091	0.764076	65.6452	74.3006
C11orf65	8.37992	5.08835	17.1941	4.76973	30.0767	1.13621	0.112629	0.267929	6.73414	17.3468
C11orf68	387.87	534.277	203.105	424.506	300.767	-0.61754	0.00181716	0.0163837	461.074	309.46
C11orf71	320.831	329.047	296.598	272.829	331.846	-0.114334	0.508317	0.688901	324.939	300.424
C11orf72	0	0	1.07463	1.90789	2.00511	2.71755	0.317322	NA	0	1.66255
C11orf73	317.24	234.064	211.702	399.704	301.77	0.114541	0.544587	0.715723	275.652	304.392
C11orf74	55.068	30.5301	19.3433	104.934	58.1483	0.276939	0.442287	0.634986	42.7991	60.8086
C11orf80	475.261	130.601	796.301	141.184	325.831	0.267784	0.571174	0.736588	302.931	421.105
C11orf84	63.4479	42.403	60.1793	43.8816	54.1381	0.00443009	0.989439	0.995105	52.9254	52.733
C11orf85	5.98565	3.39224	21.4926	20.9868	22.0563	2.26343	0.0319266	0.11542	4.68895	21.5119
C11orf91	2.39426	3.39224	7.52241	9.53947	9.02302	1.71461	0.135153	NA	2.89325	8.69496
C11orf94	1.19713	0	1.07463	0.953947	1.00256	0.646487	0.748928	NA	0.598565	1.01038
C11orf95	108.939	88.1981	117.135	171.71	104.266	0.399565	0.0938364	0.237415	98.5685	131.037
C12orf10	288.509	201.838	202.03	264.243	197.504	-0.160662	0.429954	0.623658	245.173	221.259
C12orf29	202.315	147.562	379.344	204.145	211.54	0.561911	0.00684534	0.0409025	174.939	265.01
C12orf4	399.842	378.234	562.031	784.144	856.184	0.909985	5.21192e-05	0.00131803	389.038	734.12
C12orf40	1.19713	0	2.14926	1.90789	7.0179	2.3871	0.1776	NA	0.598565	3.69168
C12orf42	112.53	16.9612	92.4182	80.1315	55.1406	0.390819	0.645135	0.789438	64.7457	75.8968
C12orf43	172.387	137.386	198.807	265.197	237.606	0.587782	0.0029815	0.0228368	154.886	233.87
C12orf45	69.4336	33.9224	63.4032	52.4671	67.1713	0.259008	0.444708	0.637405	51.678	61.0139
C12orf49	733.841	627.564	1178.87	1258.26	768.961	0.648455	0.00120687	0.012392	680.702	1068.7
C12orf54	1.19713	1.69612	0	5.72368	0	-0.637027	0.731358	NA	1.44662	1.90789
C12orf56	3.59139	0	5.37315	2.86184	1.00256	1.02322	0.563316	NA	1.7957	3.07918
C12orf57	99.3619	96.6787	128.956	56.2829	116.297	-0.0517957	0.859501	0.930671	98.0203	100.512
C12orf60	25.1397	18.6573	17.1941	31.4802	14.0358	-0.110862	0.865787	0.933224	21.8985	20.9034
C12orf65	159.218	83.1098	217.075	287.138	310.793	1.19996	1.05069e-06	7.73415e-05	121.164	271.669
C12orf66	251.397	145.866	313.792	303.355	227.58	0.535472	0.0300366	0.110993	198.632	281.576
C12orf71	44.2938	40.7068	99.9406	24.8026	62.1585	0.329033	0.400094	0.596697	42.5003	62.3006
C12orf73	86.1934	30.5301	90.2689	112.566	52.133	0.579261	0.074436	0.20425	58.3618	84.9892
C12orf74	1.19713	0	10.7463	0.953947	5.01279	2.45133	0.252137	NA	0.598565	5.57101
C12orf75	627.297	420.637	609.315	511.316	604.542	0.147036	0.742906	0.856158	523.967	575.058
C12orf76	531.526	724.242	372.897	471.25	464.184	-0.512696	0.125778	0.287601	627.884	436.11
C12orf79	220.272	222.191	396.538	165.987	164.419	0.0423831	0.898707	0.950157	221.232	242.315
C14orf1	175.978	157.739	169.792	181.25	264.675	0.303549	0.277734	0.475482	166.859	205.239
C14orf119	808.063	725.939	407.285	1154.28	442.128	-0.355585	0.0321124	0.115851	767.001	667.896
C14orf132	13.1684	15.2651	37.612	69.6381	47.1202	1.73254	0.0130123	0.0638362	14.2168	51.4568
C14orf142	160.416	133.993	67.7017	156.447	125.32	-0.403128	0.074402	0.204243	147.204	116.49
C14orf159	5719.89	8845.26	7766.35	4844.14	10162.9	0.0534755	0.8396	0.917486	7282.57	7591.14
C14orf166	1740.63	1329.76	1344.36	2021.41	2088.33	0.235426	0.211014	0.401029	1535.19	1818.03
C14orf169	101.756	89.8943	120.359	174.572	196.501	0.789085	0.00084934	0.00966973	95.8252	163.811
C14orf178	1.19713	6.78447	7.52241	0	3.00767	-0.394092	0.786413	NA	3.9908	3.51003
C14orf2	4142.07	5008.64	2054.69	3428.49	2855.28	-0.736153	0.00012065	0.0024006	4575.36	2779.49
C14orf28	175.978	181.485	167.642	225.131	125.32	-0.0629288	0.78441	0.883139	178.731	172.698
C14orf37	4.78852	1.69612	4.29852	0.953947	0	-1.04026	0.538725	NA	3.24232	1.75082
C14orf79	43.0967	39.0107	30.0896	20.0329	18.046	-0.883652	0.0565474	0.169691	41.0537	22.7229
C14orf80	13.1684	39.0107	8.59704	6.67763	25.0639	-0.866856	0.163555	0.340736	26.0896	13.4462
C14orf93	911.017	900.639	571.703	630.559	713.821	-0.517022	0.0082294	0.0461806	905.828	638.694
C15orf26	220.272	115.336	34.3882	41.9737	74.1892	-1.64048	0.02444	0.0969868	167.804	50.1837
C15orf27	3.59139	3.39224	5.37315	4.76973	13.0332	1.14259	0.236941	NA	3.49181	7.72538
C15orf39	3353.16	4357.33	2224.48	1290.69	5132.09	-0.447158	0.278705	0.47642	3855.25	2882.42
C15orf40	379.491	257.81	279.404	469.342	267.683	0.0614797	0.751488	0.861589	318.65	338.809
C15orf41	57.4623	54.2758	70.9256	85.8552	50.1279	0.308296	0.275776	0.473592	55.869	68.9696
C15orf43	10.7742	40.7068	64.4778	1.90789	9.02302	-0.725529	0.372825	0.570128	25.7405	25.1362
C15orf48	29.9283	72.9331	24.7165	17.171	95.2429	-0.113313	0.877351	0.938719	51.4307	45.7102
C15orf52	554.272	647.917	481.434	653.454	262.67	-0.441299	0.211046	0.401041	601.094	465.853
C15orf53	7.18279	13.5689	4.29852	9.53947	18.046	0.102636	0.899728	0.950467	10.3759	10.628
C15orf54	96.9676	8.48059	3.22389	24.8026	23.0588	-1.1111	0.253722	0.449555	52.7241	17.0284
C15orf56	0	0	4.29852	0	1.00256	1.87911	0.524708	NA	0	1.76703
C15orf57	683.562	883.678	914.51	888.125	961.452	0.248236	0.107844	0.260114	783.62	921.362
C15orf61	11.9713	3.39224	8.59704	10.4934	15.0384	0.586214	0.428166	0.622013	7.68177	11.3763
C15orf62	113.727	111.944	182.687	133.553	107.274	0.318808	0.215959	0.406534	112.836	141.171
C15orf65	9.57705	6.78447	7.52241	12.4013	7.0179	0.112755	0.906393	0.953297	8.18076	8.98054
C16orf13	77.8135	45.7952	81.6719	74.4079	109.279	0.568483	0.194648	0.381057	61.8044	88.4528
C16orf45	590.186	444.383	106.388	204.145	239.611	-1.48379	2.16771e-05	0.000696768	517.284	183.381
C16orf46	15.5627	10.1767	20.418	20.9868	37.0946	1.0011	0.0480203	0.151613	12.8697	26.1665
C16orf47	1.19713	0	0	6.67763	0	0.500178	0.809672	NA	0.598565	2.22588
C16orf52	489.627	295.125	568.479	689.704	370.946	0.488303	0.0387506	0.131443	392.376	543.043
C16orf54	5782.14	12173	4186.76	6207.33	5948.17	-0.678877	0.0376246	0.128972	8977.59	5447.42
C16orf58	478.852	371.45	640.479	443.585	645.647	0.433978	0.0337309	0.119979	425.151	576.571
C16orf59	1.19713	5.08835	0	1.90789	6.01534	-0.16243	0.894598	NA	3.14274	2.64108
C16orf62	829.612	719.154	838.211	1362.24	933.381	0.40107	0.000755344	0.0088845	774.383	1044.61
C16orf70	1674.79	1626.58	911.286	1512.01	1223.12	-0.475147	0.00386395	0.0273835	1650.68	1215.47
C16orf71	13.1684	15.2651	13.9702	7.63158	20.0511	-0.0352852	0.957694	0.978922	14.2168	13.8843
C16orf72	12452.6	17653.2	10111.2	7716.48	11163.5	-0.632786	0.000525123	0.00683838	15052.9	9663.71
C16orf74	16.7598	13.5689	24.7165	10.4934	5.01279	-0.277171	0.617908	0.76927	15.1644	13.4076
C16orf86	9.57705	35.6185	11.8209	18.125	15.0384	-0.622183	0.331892	0.530603	22.5978	14.9948
C16orf87	870.314	546.15	552.36	514.177	957.442	-0.105277	0.734625	0.851182	708.232	674.66
C16orf89	2.39426	1.69612	5.37315	3.81579	5.01279	1.22611	0.333632	NA	2.04519	4.73391
C16orf90	2.39426	1.69612	6.44778	1.90789	1.00256	0.340975	0.824864	NA	2.04519	3.11941
C16orf91	56.2652	67.8447	55.8808	24.8026	49.1253	-0.560459	0.146426	0.316364	62.0549	43.2696
C16orf95	9.57705	6.78447	11.8209	5.72368	15.0384	0.342506	0.668154	0.806217	8.18076	10.861
C16orf96	16.7598	49.1874	29.015	3.81579	17.0435	-1.3377	0.0396238	0.133375	32.9736	16.6248
C17orf100	56.2652	22.0495	60.1793	41.9737	62.1585	0.584896	0.178015	0.359632	39.1573	54.7705
C17orf104	34.7168	50.8835	66.6271	38.1579	71.1816	0.438063	0.281241	0.478781	42.8002	58.6555
C17orf105	1.19713	5.08835	3.22389	15.2632	3.00767	1.09691	0.348944	NA	3.14274	7.1649
C17orf107	7.18279	61.0603	19.3433	0	19.0486	-1.76603	0.0539246	0.164108	34.1215	12.7973
C17orf47	0	0	0	4.76973	4.01023	3.18323	0.0790454	NA	0	2.92665
C17orf50	1.19713	0	5.37315	0.953947	4.01023	1.91496	0.226488	NA	0.598565	3.44578
C17orf51	86.1934	94.9826	137.553	309.079	133.34	0.98446	0.0760826	0.206864	90.588	193.324
C17orf53	329.211	364.665	842.51	248.98	72.1841	0.0059592	0.991585	0.995904	346.938	387.891
C17orf58	105.348	106.855	77.3733	104.934	80.2046	-0.294299	0.261909	0.458465	106.101	87.504
C17orf59	135.276	208.623	89.1943	123.059	72.1841	-0.88872	0.0217273	0.0901939	171.949	94.8125
C17orf62	3567.45	6295.99	3298.04	3536.28	3775.63	-0.418978	0.122686	0.282818	4931.72	3536.65
C17orf67	135.276	86.502	121.433	83.9473	133.34	0.0192414	0.952009	0.976613	110.889	112.907
C17orf75	307.663	257.81	435.225	475.066	298.762	0.509239	0.0180346	0.0791171	282.736	403.018
C17orf77	15.5627	6.78447	10.7463	14.3092	18.046	0.395873	0.575473	0.739214	11.1736	14.3672
C17orf78	0	0	2.14926	8.58552	8.02046	4.4548	0.0109328	NA	0	6.25175
C17orf80	404.63	283.252	312.717	980.657	279.713	0.433594	0.120599	0.279633	343.941	524.363
C17orf85	3340	4559.17	3867.59	3680.33	2631.71	-0.206724	0.225006	0.417351	3949.58	3393.21
C17orf89	47.8852	55.9719	48.3583	43.8816	44.1125	-0.18864	0.617959	0.769272	51.9286	45.4508
C17orf96	46.6881	20.3534	22.5672	25.7566	105.269	0.398466	0.53529	0.708912	33.5208	51.1974
C17orf97	87.3906	35.6185	45.1345	69.6381	42.1074	-0.30822	0.489642	0.673421	61.5045	52.2933
C17orf99	0	0	1.07463	1.90789	2.00511	2.68778	0.256333	NA	0	1.66255
C18orf21	511.175	508.835	608.24	505.592	840.143	0.336896	0.0890735	0.229161	510.005	651.325
C18orf25	7820.86	9971.48	8780.8	5172.3	10820.6	-0.141311	0.531339	0.706604	8896.17	8257.9
C18orf54	108.939	76.3253	147.224	195.559	78.1995	0.589849	0.0566307	0.169871	92.6321	140.328
C18orf61	21.5484	40.7068	12.8956	2.86184	24.0614	-1.3324	0.0592941	0.175509	31.1276	13.2729
C18orf65	19.1541	11.8728	9.67167	22.8947	6.01534	-0.436124	0.577024	0.740311	15.5135	12.8606
C18orf8	2267.37	2754.5	2647.89	1677.99	2979.6	-0.0692885	0.614042	0.765976	2510.93	2435.16
C19orf12	288.509	261.202	533.016	645.822	627.601	1.1303	8.1233e-05	0.00181458	274.855	602.146
C19orf18	50.2795	33.9224	33.3135	27.6645	27.069	-0.537269	0.304618	0.503973	42.1009	29.349
C19orf24	7.18279	16.9612	6.44778	3.81579	13.0332	-0.623153	0.54262	0.714162	12.072	7.7656
C19orf25	29.9283	49.1874	34.3882	41.9737	34.0869	-0.11029	0.866712	0.933643	39.5579	36.8163
C19orf35	729.053	607.21	457.792	398.75	413.054	-0.676514	0.0060108	0.0372651	668.132	423.199
C19orf38	2334.41	4682.98	1796.78	1846.84	2267.78	-0.748997	0.00359516	0.0261086	3508.69	1970.47
C19orf43	1398.25	1830.11	1157.38	974.934	992.532	-0.622021	0.000790669	0.0091761	1614.18	1041.61
C19orf44	56.2652	71.237	101.015	38.1579	70.179	0.0478817	0.890618	0.946071	63.7511	69.784
C19orf45	113.727	128.905	307.344	4.76973	207.529	-0.766845	0.195846	0.382306	121.316	173.214
C19orf47	82.602	84.8059	70.9256	82.9934	105.269	0.0539345	0.891464	0.946457	83.704	86.3958
C19orf48	140.064	81.4137	190.209	95.3947	199.509	0.510885	0.144387	0.313667	110.739	161.704
C19orf52	105.348	62.7564	135.403	156.447	122.312	0.706566	0.0033415	0.0247129	84.0519	138.054
C19orf53	378.293	444.383	297.672	335.789	551.406	-0.0487687	0.881351	0.941448	411.338	394.956
C19orf54	362.731	388.411	443.822	742.171	349.892	0.406511	0.0613304	0.179396	375.571	511.962
C19orf57	2.39426	5.08835	9.67167	7.63158	8.02046	1.23525	0.159052	NA	3.74131	8.44123
C19orf60	28.7311	25.4418	30.0896	23.8487	30.0767	0.0679105	0.883745	0.942409	27.0865	28.005
C19orf66	1060.66	1333.15	938.152	653.454	2581.58	0.171098	0.666065	0.804564	1196.9	1391.06
C19orf67	3.59139	1.69612	5.37315	2.86184	2.00511	0.254952	0.854257	NA	2.64376	3.41337
C19orf68	520.752	342.616	432.001	572.368	582.486	0.2902	0.21179	0.401815	431.684	528.952
C19orf70	57.4623	55.9719	49.433	40.0658	120.307	0.296345	0.471442	0.659505	56.7171	69.9352
C19orf71	45.491	66.1486	38.6867	15.2632	63.1611	-0.563961	0.384496	0.581006	55.8198	39.037
C19orf84	10.7742	11.8728	49.433	25.7566	29.0742	1.60997	0.0188282	0.0813756	11.3235	34.7546
C1D	1315.65	2976.69	2042.87	1725.69	1887.82	-0.103004	0.586931	0.747198	2146.17	1885.46
C1GALT1	5264.98	5966.94	6413.39	6739.64	10412.6	0.485179	0.0431844	0.141119	5615.96	7855.2
C1GALT1C1	911.017	1324.67	723.226	1247.76	835.13	-0.262146	0.14024	0.307872	1117.84	935.373
C1orf100	55.068	54.2758	11.8209	16.2171	28.0716	-1.54337	0.000177169	0.0031563	54.6719	18.7032
C1orf101	34.7168	40.7068	34.3882	31.4802	45.1151	-0.0197725	0.957093	0.978754	37.7118	36.9945
C1orf105	5.98565	5.08835	5.37315	2.86184	7.0179	-0.21163	0.861473	0.931341	5.537	5.0843
C1orf106	11.9713	8.48059	2.14926	11.4474	5.01279	-0.954045	0.433372	NA	10.226	6.20314
C1orf109	215.484	103.463	224.598	276.645	195.499	0.557795	0.00976594	0.0524564	159.473	232.247
C1orf111	0	10.1767	3.22389	4.76973	1.00256	-0.582768	0.713291	NA	5.08835	2.99873
C1orf112	536.315	395.196	377.195	522.763	438.118	-0.0663447	0.777911	0.87937	465.755	446.025
C1orf115	164.007	76.3253	40.8359	109.704	45.1151	-0.939568	0.0515848	0.159338	120.166	65.2183
C1orf116	84.9963	66.1486	80.5972	48.6513	51.1304	-0.392634	0.347986	0.546726	75.5725	60.1263
C1orf122	172.387	208.623	92.4182	74.4079	96.2455	-1.11428	2.52655e-05	0.00077674	190.505	87.6905
C1orf123	617.72	519.012	570.628	691.612	594.516	0.121619	0.395029	0.591224	568.366	618.919
C1orf127	31.1254	3.39224	9.67167	43.8816	13.0332	0.084029	0.905136	0.953116	17.2588	22.1955
C1orf131	159.218	189.965	207.404	662.039	329.841	1.04093	2.3138e-05	0.000729941	174.592	399.761
C1orf145	21.5484	15.2651	33.3135	13.3553	71.1816	1.02459	0.0935885	0.236979	18.4067	39.2834
C1orf146	22.7455	5.08835	37.612	10.4934	16.0409	0.456958	0.414167	0.609625	13.9169	21.3821
C1orf159	8.37992	6.78447	9.67167	6.67763	15.0384	0.534584	0.528114	0.703867	7.58219	10.4626
C1orf162	12589	13865.8	9827.49	17701.4	5325.58	-0.330688	0.268867	0.465859	13227.4	10951.5
C1orf167	7.18279	1.69612	3.22389	0	1.00256	-2.66662	0.146647	NA	4.43945	1.40882
C1orf174	1025.94	1048.2	931.704	1016.91	705.8	-0.242648	0.261351	0.457596	1037.07	884.804
C1orf177	29.9283	47.4913	72.0002	49.6052	18.046	0.107307	0.86569	0.933183	38.7098	46.5505
C1orf186	61.0537	6.78447	106.388	98.2565	45.1151	1.45566	0.0723224	0.200591	33.9191	83.2533
C1orf189	14.3656	25.4418	15.0448	7.63158	16.0409	-0.632818	0.22453	0.416764	19.9037	12.9058
C1orf194	25.1397	79.7176	31.1643	6.67763	46.1176	-1.02843	0.169794	0.349508	52.4287	27.9865
C1orf195	0	0	0	0.953947	1.00256	1.24765	0.683489	NA	0	0.652168
C1orf198	193.935	261.202	73.0748	153.585	205.524	-0.695714	0.166952	0.345517	227.569	144.062
C1orf204	185.555	103.463	89.1943	41.9737	74.1892	-1.15384	0.00793305	0.0451478	144.509	68.4524
C1orf21	450.121	527.493	1571.11	645.822	326.834	0.559577	0.314704	0.513182	488.807	847.922
C1orf216	520.752	305.301	323.464	542.796	272.696	-0.140288	0.555925	0.72437	413.027	379.652
C1orf220	68.2365	13.5689	50.5076	87.7631	29.0742	0.584088	0.357201	0.555831	40.9027	55.7816
C1orf226	33.5197	122.121	63.4032	106.842	18.046	-0.0490011	0.935648	0.967297	77.8201	62.7637
C1orf228	209.498	369.754	127.881	225.131	234.598	-0.583836	0.144446	0.313679	289.626	195.87
C1orf233	3.59139	10.1767	0	0.953947	5.01279	-1.85034	0.188528	NA	6.88405	1.98891
C1orf234	0	0	1.07463	0	2.00511	1.60503	0.422606	NA	0	1.02658
C1orf27	1432.97	1704.6	1589.38	1510.1	1855.73	0.0799079	0.612353	0.765027	1568.78	1651.74
C1orf35	87.3906	71.237	73.0748	61.0526	61.156	-0.285832	0.308971	0.507701	79.3138	65.0945
C1orf43	2834.81	2829.13	2046.1	3716.58	2316.91	-0.117888	0.334808	0.533482	2831.97	2693.19
C1orf50	198.724	133.993	210.627	162.171	171.437	0.1076	0.641465	0.786463	166.359	181.412
C1orf52	1279.73	1965.8	1628.06	932.96	1605.09	-0.236181	0.0869799	0.226085	1622.77	1388.71
C1orf54	55.068	42.403	69.8509	114.474	109.279	1.0002	0.0139991	0.0668571	48.7355	97.8678
C1orf56	140.064	123.817	56.9554	45.7895	55.1406	-1.34469	2.98617e-05	0.000884354	131.94	52.6285
C1orf61	4.78852	10.1767	11.8209	0.953947	9.02302	-0.222107	0.800985	NA	7.48262	7.26596
C1orf74	511.175	274.771	350.329	713.552	134.343	-0.0414203	0.91966	0.959459	392.973	399.408
C1orf87	1.19713	0	1.07463	39.1118	0	2.31592	0.385751	0.581781	0.598565	13.3955
C1orf95	10.7742	11.8728	63.4032	0	30.0767	-0.0830173	0.937716	0.968158	11.3235	31.16
C1QA	71.8279	42.403	204.18	548.519	409.043	2.81312	7.39271e-05	0.00169944	57.1154	387.248
C1QB	43.0967	39.0107	96.7167	313.849	173.442	2.22901	0.00485151	0.0323092	41.0537	194.669
C1QBP	337.591	274.771	262.21	448.355	470.199	0.357777	0.171433	0.351543	306.181	393.588
C1QC	7.18279	10.1767	26.8657	61.0526	60.1534	2.54425	0.00522504	0.0341064	8.67975	49.3573
C1QL3	55.068	40.7068	110.687	52.4671	53.1355	0.532017	0.236954	0.431147	47.8874	72.0965
C1QTNF3	77.8135	39.0107	117.135	66.7763	102.261	0.686449	0.0107199	0.0559324	58.4121	95.3906
C1QTNF3-AMACR	2.39426	5.08835	11.8209	3.81579	7.0179	0.924614	0.347405	NA	3.74131	7.55154
C1QTNF6	179.57	212.015	220.299	126.875	184.471	-0.191293	0.617287	0.768978	195.792	177.215
C1QTNF7	49.0824	39.0107	46.2091	13.3553	99.2532	-0.111423	0.871093	0.93568	44.0465	52.9392
C1QTNF9	5.98565	8.48059	13.9702	2.86184	10.0256	0.0306782	0.977347	NA	7.23312	8.95253
C1QTNF9B-AS1	0	0	1.07463	2.86184	1.00256	2.60219	0.202081	NA	0	1.64634
C1R	409.419	512.228	292.299	147.862	345.882	-0.873348	0.0048508	0.0323092	460.823	262.014
C1RL	10993.3	14322	6582.11	8841.18	5985.27	-0.820318	0.00031065	0.00475653	12657.6	7136.18
C1RL-AS1	438.15	3281.99	3051.95	3178.55	3250.29	1.00195	0.132783	0.297372	1860.07	3160.26
C1S	69.4336	28.834	79.5226	59.1447	96.2455	0.630679	0.111769	0.266731	49.1338	78.3043
C2	213.089	72.9331	150.448	1665.59	921.35	2.38284	0.000103894	0.00218358	143.011	912.463
C2-AS1	4.78852	6.78447	4.29852	29.5724	10.0256	1.04438	0.292753	NA	5.7865	14.6321
C20orf173	2.39426	5.08835	7.52241	3.81579	5.01279	0.606371	0.531447	NA	3.74131	5.45033
C20orf194	840.386	535.973	636.181	996.875	606.547	0.109783	0.614535	0.766288	688.18	746.534
C20orf195	14.3656	5.08835	8.59704	0.953947	26.0665	0.0438756	0.965025	0.982104	9.72696	11.8725
C20orf196	191.541	215.407	175.165	262.335	229.586	0.125093	0.557117	0.725201	203.474	222.362
C20orf197	1441.35	1972.59	642.629	1160	461.176	-1.2515	0.00029409	0.00458354	1706.97	754.601
C20orf202	13.1684	0	4.29852	10.4934	9.02302	0.428805	0.641267	NA	6.58422	7.93832
C20orf203	7.18279	0	16.1194	8.58552	4.01023	1.34331	0.186952	NA	3.59139	9.57173
C20orf24	383.082	305.301	295.523	128.783	262.67	-0.726128	0.0153815	0.0711656	344.192	228.992
C20orf27	136.473	122.121	67.7017	155.493	71.1816	-0.503699	0.141904	0.31018	129.297	98.1255
C20orf62	2.39426	5.08835	2.14926	0	3.00767	-1.52488	0.285574	NA	3.74131	1.71898
C20orf96	165.204	105.159	220.299	248.026	149.381	0.593689	0.144288	0.313597	135.182	205.902
C21orf140	26.3369	18.6573	37.612	35.296	23.0588	0.520771	0.248532	0.443248	22.4971	31.989
C21orf2	210.695	145.866	338.508	157.401	367.939	0.625163	0.00975911	0.0524377	178.281	287.949
C21orf33	621.311	410.461	557.733	745.987	530.353	0.244631	0.111477	0.266357	515.886	611.357
C21orf58	77.8135	54.2758	91.3435	97.3026	91.2327	0.503004	0.0442019	0.143283	66.0446	93.2929
C21orf59	283.72	206.926	221.374	365.362	255.652	0.184043	0.242261	0.436197	245.323	280.796
C21orf62	14.3656	1.69612	16.1194	18.125	20.0511	1.44476	0.0518494	0.159777	8.03084	18.0985
C21orf62-AS1	51.4766	22.0495	44.0598	74.4079	40.1023	0.599127	0.13718	0.303778	36.7631	52.8567
C21orf91	2138.08	2070.96	1276.66	2220.79	2512.41	-0.0929721	0.697722	0.826627	2104.52	2003.29
C21orf91-OT1	39.5053	39.0107	29.015	29.5724	11.0281	-0.750937	0.23091	0.424386	39.258	23.2052
C22orf15	7.18279	5.08835	5.37315	10.4934	17.0435	0.834644	0.338236	NA	6.13557	10.97
C22orf23	207.104	189.965	343.882	317.664	445.135	0.896997	0.000888788	0.00998708	198.534	368.894
C22orf24	33.5197	16.9612	11.8209	9.53947	24.0614	-0.750275	0.19211	0.378713	25.2404	15.1406
C22orf29	434.559	312.086	512.598	559.967	563.437	0.559282	0.0102381	0.0541421	373.322	545.334
C22orf34	137.67	91.5904	221.374	354.868	130.332	0.992268	0.0302906	0.111616	114.63	235.525
C22orf39	796.092	824.313	665.196	596.217	489.248	-0.474876	0.00394652	0.0277602	810.203	583.554
C22orf42	1.19713	1.69612	0	7.63158	1.00256	0.124464	0.948217	NA	1.44662	2.87804
C22orf46	866.723	627.564	828.54	1139.01	1307.33	0.55916	0.0190116	0.0819864	747.143	1091.63
C2CD2	337.591	147.562	418.031	371.085	418.066	0.75695	0.00530231	0.0343664	242.577	402.394
C2CD2L	1895.06	1275.48	844.659	958.717	737.882	-0.882209	0.000219633	0.00368697	1585.27	847.086
C2CD3	2212.3	2026.86	2442.63	2093.91	2867.31	0.205539	0.298551	0.497173	2119.58	2467.95
C2CD4D	4.78852	6.78447	16.1194	4.76973	9.02302	0.672086	0.479166	NA	5.7865	9.97073
C2CD5	4351.57	4160.58	3389.38	6443.91	2330.95	-0.150567	0.51031	0.69036	4256.07	4054.75
C2orf15	14.3656	20.3534	20.418	23.8487	7.0179	-0.0332458	0.960131	0.980079	17.3595	17.0948
C2orf16	22.7455	15.2651	17.1941	22.8947	7.0179	-0.299188	0.588362	0.74829	19.0053	15.7022
C2orf27A	22.7455	13.5689	29.015	16.2171	22.0563	0.290464	0.680486	0.814952	18.1572	22.4295
C2orf40	3.59139	6.78447	6.44778	1.90789	1.00256	-1.22011	0.294854	NA	5.18793	3.11941
C2orf42	395.053	237.457	269.732	437.862	387.99	0.209119	0.329411	0.527994	316.255	365.194
C2orf44	111.333	55.9719	144	293.816	68.1739	0.949611	0.00524613	0.0341445	83.6525	168.663
C2orf47	102.953	145.866	190.209	244.21	275.703	0.945453	0.00129849	0.0130842	124.41	236.708
C2orf48	16.7598	44.0991	36.5374	72.5	26.0665	0.457734	0.489153	0.673013	30.4295	45.0346
C2orf49	1237.83	1967.5	2050.39	1395.62	1494.81	0.0443185	0.78057	0.880979	1602.67	1646.94
C2orf50	1.19713	3.39224	2.14926	1.90789	11.0281	1.16181	0.454405	NA	2.29468	5.02843
C2orf61	57.4623	72.9331	72.0002	51.5131	27.069	-0.376141	0.496005	0.679124	65.1977	50.1941
C2orf66	46.6881	22.0495	16.1194	7.63158	73.1867	-0.154779	0.850617	0.92405	34.3688	32.3126
C2orf68	4221.08	3743.33	2960.61	3521.97	2235.7	-0.459897	0.00476499	0.031873	3982.21	2906.09
C2orf69	1407.83	2408.49	2256.72	1610.26	1653.22	-0.0114885	0.952965	0.976702	1908.16	1840.07
C2orf71	0	0	3.22389	1.90789	5.01279	3.69497	0.0708952	NA	0	3.38152
C2orf74	256.186	154.347	120.359	322.434	277.708	0.205384	0.522137	0.699053	205.266	240.167
C2orf76	384.279	369.754	219.224	304.309	231.591	-0.595472	0.0126853	0.0628171	377.016	251.708
C2orf81	15.5627	3.39224	8.59704	0.953947	6.01534	-0.776205	0.382511	NA	9.47747	5.18878
C2orf88	2831.21	2143.89	715.703	1677.04	1511.86	-0.898603	0.106145	0.257744	2487.55	1301.53
C2orf91	2.39426	0	0	0	0	-2.95448	0.169364	NA	1.19713	0
C3	208.301	281.556	42.9852	112.566	289.739	-0.725544	0.189612	0.375781	244.928	148.43
C3AR1	7592.2	10076.6	2981.02	11244.2	4337.06	-0.738168	0.240984	0.434748	8834.42	6187.42
C3orf14	33.5197	30.5301	18.2687	38.1579	85.2174	0.516904	0.380082	0.576447	32.0249	47.2147
C3orf17	1834	1468.84	2824.13	2250.36	1831.67	0.476738	0.00384948	0.0273351	1651.42	2302.05
C3orf18	197.527	157.739	160.12	162.171	316.808	0.275069	0.419657	0.614276	177.633	213.033
C3orf20	160.416	227.28	82.7465	204.145	97.2481	-0.675509	0.0728854	0.20176	193.848	128.046
C3orf22	16.7598	27.1379	8.59704	37.2039	16.0409	-0.281482	0.706	0.832471	21.9489	20.614
C3orf33	61.0537	49.1874	42.9852	48.6513	64.1637	-0.0712504	0.849363	0.923223	55.1206	51.9334
C3orf35	141.261	135.689	181.612	81.0855	237.606	0.159681	0.530402	0.706017	138.475	166.768
C3orf38	1110.94	873.501	1299.23	1392.76	2267.78	0.72523	0.00122544	0.0125416	992.219	1653.26
C3orf49	26.3369	33.9224	31.1643	57.2368	58.1483	0.710689	0.135146	0.300519	30.1296	48.8498
C3orf52	33.5197	8.48059	19.3433	28.6184	34.0869	0.528366	0.426373	0.62037	21.0001	27.3496
C3orf58	1862.74	1251.74	1397.02	2010.92	2017.15	0.178977	0.473458	0.66111	1557.24	1808.36
C3orf62	6651.26	9930.77	4369.44	3002.07	3210.19	-1.22351	7.40299e-05	0.00169944	8291.02	3527.23
C3orf67	5.98565	5.08835	0	1.90789	10.0256	-0.53395	0.679733	NA	5.537	3.97782
C3orf70	10.7742	10.1767	8.59704	5.72368	13.0332	-0.264933	0.718217	0.840291	10.4754	9.11799
C3orf80	1.19713	1.69612	0	4.76973	0	-0.561916	0.800127	NA	1.44662	1.58991
C3orf84	0	1.69612	2.14926	1.90789	0	1.22385	0.620337	NA	0.848059	1.35238
C4BPA	4177.99	659.79	155.821	62.0066	32.0818	-5.46045	7.02813e-05	0.00163736	2418.89	83.3032
C4BPB	3.59139	5.08835	13.9702	2.86184	12.0307	0.969787	0.327319	NA	4.33987	9.62091
C4orf17	2.39426	1.69612	0	1.90789	3.00767	-0.491062	0.83771	NA	2.04519	1.63852
C4orf19	180.767	447.775	173.015	70.5921	73.1867	-1.65146	0.00161241	0.0150985	314.271	105.598
C4orf22	2.39426	3.39224	0	3.81579	6.01534	0.280908	0.893289	NA	2.89325	3.27704
C4orf26	21.5484	8.48059	3.22389	3.81579	3.00767	-2.10002	0.0469016	NA	15.0145	3.34912
C4orf27	202.315	154.347	163.344	313.849	192.491	0.27114	0.228344	0.421406	178.331	223.228
C4orf29	1007.98	966.787	1039.17	1078.91	1089.78	0.112076	0.408649	0.60451	987.386	1069.29
C4orf3	11184.8	15504.2	11145	11473.1	10664.2	-0.240197	0.25748	0.453242	13344.5	11094.1
C4orf32	706.307	647.917	416.956	813.717	991.529	0.0945654	0.742139	0.855949	677.112	740.734
C4orf33	1108.54	1253.43	887.644	1222.01	1263.22	-0.0756643	0.697104	0.826328	1180.99	1124.29
C4orf36	2.39426	5.08835	5.37315	3.81579	12.0307	1.07817	0.432301	NA	3.74131	7.07321
C4orf45	14.3656	8.48059	12.8956	4.76973	21.0537	-0.0706382	0.930052	0.963337	11.4231	12.9063
C4orf46	620.114	753.076	456.718	489.375	786.005	-0.239168	0.331919	0.530603	686.595	577.366
C4orf47	2.39426	0	3.22389	3.81579	5.01279	1.80637	0.228945	NA	1.19713	4.01749
C5	519.555	357.881	574.927	784.144	535.366	0.519762	0.0214229	0.0893324	438.718	631.479
C5AR1	22624.6	43086.5	19490.6	18361.6	14734.6	-0.83916	0.0397139	0.133564	32855.5	17528.9
C5AR2	1757.39	2595.06	1388.42	1153.32	739.887	-0.953744	0.00489632	0.0325019	2176.22	1093.88
C5orf15	1365.93	1200.85	1155.23	2028.09	1392.55	0.211054	0.0959951	0.24104	1283.39	1525.29
C5orf17	0	5.08835	0	4.76973	0	-2.47358	0.239874	NA	2.54418	1.58991
C5orf22	624.902	415.549	573.852	1104.67	489.248	0.419527	0.0799473	0.214713	520.226	722.59
C5orf24	2015.97	1348.41	2256.72	2296.15	1639.18	0.311072	0.0563288	0.169354	1682.19	2064.02
C5orf28	271.749	188.269	355.702	422.598	277.708	0.627521	0.00161989	0.0151451	230.009	352.003
C5orf30	3685.97	3212.45	4136.25	4702	235.601	-0.131224	0.863805	0.932308	3449.21	3024.62
C5orf34	81.4049	50.8835	81.6719	101.118	61.156	0.323179	0.298109	0.49671	66.1442	81.3154
C5orf42	205.907	140.778	423.404	452.171	284.726	1.17014	7.77112e-05	0.00176074	173.342	386.767
C5orf45	274.143	128.905	390.091	149.77	343.877	0.460859	0.144986	0.314461	201.524	294.579
C5orf47	110.136	47.4913	36.5374	33.3881	94.2404	-0.752164	0.351177	0.549676	78.8137	54.722
C5orf51	1740.63	1139.79	983.286	2873.29	1247.18	0.12285	0.617033	0.768791	1440.21	1701.25
C5orf56	894.257	1455.27	924.182	612.434	3132.99	0.352148	0.436456	0.629259	1174.76	1556.54
C5orf58	987.633	987.141	609.315	423.552	1090.78	-0.53177	0.0977688	0.243746	987.387	707.883
C5orf60	2.39426	1.69612	2.14926	0.953947	3.00767	-0.108089	0.953831	NA	2.04519	2.03696
C5orf63	316.043	179.789	441.673	252.796	411.048	0.575081	0.0525642	0.161138	247.916	368.506
C5orf64	0	0	0	0	0	0	1	NA	0	0
C5orf66	4916.62	5295.28	3689.2	1568.29	1817.64	-1.1954	1.40869e-06	9.60299e-05	5105.95	2358.38
C5orf67	204.709	390.107	192.359	82.0394	270.69	-0.762377	0.0487646	0.15313	297.408	181.696
C6orf1	247.806	364.665	176.239	116.382	251.642	-0.755199	0.00396618	0.0278485	306.236	181.421
C6orf10	4.78852	0	51.5822	1.90789	7.0179	1.64042	0.236267	0.430398	2.39426	20.1693
C6orf106	4444.95	3460.08	4379.12	4696.28	5149.13	0.263197	0.0802118	0.215202	3952.51	4741.51
C6orf120	907.425	761.557	1348.66	1219.14	1048.67	0.533951	0.00140299	0.013807	834.491	1205.49
C6orf132	22.7455	22.0495	21.4926	6.67763	11.0281	-0.90296	0.235181	0.429317	22.3975	13.0661
C6orf136	666.802	854.844	625.435	309.079	785.002	-0.463963	0.0836181	0.220563	760.823	573.172
C6orf163	292.1	327.351	205.254	96.3486	59.1509	-1.4194	0.00101304	0.0108865	309.725	120.251
C6orf165	31.1254	32.2262	16.1194	17.171	16.0409	-0.967444	0.12401	0.284957	31.6758	16.4438
C6orf201	49.0824	33.9224	106.388	77.2697	60.1534	0.981556	0.0222017	0.0914369	41.5024	81.2705
C6orf203	189.147	91.5904	253.613	248.98	173.442	0.714377	0.00248173	0.0202135	140.369	225.345
C6orf222	20.3512	10.1767	27.9404	14.3092	70.179	0.953934	0.21905	0.410059	15.264	37.4762
C6orf226	28.7311	15.2651	9.67167	5.72368	8.02046	-1.53743	0.0122155	0.0614855	21.9981	7.80527
C6orf229	325.62	573.288	243.941	248.026	181.463	-0.989883	0.000135167	0.00260674	449.454	224.477
C6orf25	3219.09	5203.69	1115.47	2083.42	2426.19	-1.06358	0.0473983	0.150437	4211.39	1875.02
C6orf47	1374.31	1689.33	1124.06	1688.49	1396.56	-0.1339	0.258593	0.454385	1531.82	1403.04
C6orf48	1715.49	763.253	1125.14	1509.14	1037.65	0.0336921	0.880794	0.941156	1239.37	1223.98
C6orf52	8.37992	3.39224	8.59704	16.2171	10.0256	0.936103	0.212994	NA	5.88608	11.6132
C6orf58	0	1.69612	1.07463	0.953947	9.02302	2.27603	0.215916	NA	0.848059	3.68386
C6orf62	14534.4	19033.8	10679.7	14843.4	9663.65	-0.51295	0.0441775	0.143259	16784.1	11728.9
C6orf89	7170.81	8758.75	6592.85	7279.57	5069.93	-0.329145	0.0181517	0.0794529	7964.78	6314.12
C6orf99	7.18279	3.39224	11.8209	0.953947	2.00511	-0.903461	0.409188	NA	5.28751	4.92666
C7	0	0	1.07463	0	1.00256	1.14374	0.608007	NA	0	0.692396
C7orf13	21.5484	6.78447	41.9106	24.8026	14.0358	1.00696	0.194855	0.381272	14.1664	26.9163
C7orf25	457.304	386.715	458.867	1397.53	173.442	0.454351	0.340468	0.539593	422.009	676.614
C7orf26	459.698	588.553	454.568	476.02	584.491	-0.0422727	0.848351	0.922575	524.126	505.026
C7orf31	251.397	167.916	281.553	352.96	276.706	0.519659	0.0319782	0.115527	209.657	303.74
C7orf34	185.555	493.57	274.031	75.3618	109.279	-1.16617	0.0222415	0.0915288	339.563	152.89
C7orf43	1575.42	2535.7	1777.44	893.848	992.532	-0.768014	0.0192548	0.0826434	2055.56	1221.27
C7orf49	1692.74	2415.27	1473.32	1829.67	2255.75	-0.128325	0.547227	0.71799	2054.01	1852.91
C7orf50	38.3082	20.3534	30.0896	7.63158	32.0818	-0.383502	0.524129	0.70059	29.3308	23.2677
C7orf55	2.39426	3.39224	1.07463	1.90789	5.01279	-0.038801	0.972475	NA	2.89325	2.6651
C7orf57	14.3656	8.48059	9.67167	8.58552	14.0358	-0.134256	0.833945	0.914145	11.4231	10.7643
C7orf60	2146.46	2768.06	1821.5	1587.37	1961	-0.446757	0.0150294	0.0701947	2457.26	1789.96
C7orf61	116.122	133.993	73.0748	41.9737	110.281	-0.822845	0.0357214	0.124627	125.058	75.1099
C7orf71	20.3512	30.5301	45.1345	41.0197	46.1176	0.827054	0.0923515	0.234795	25.4407	44.0906
C7orf73	3211.9	3192.09	1720.48	2938.16	2029.18	-0.55611	0.000468938	0.00628417	3202	2229.27
C8B	0	89.8943	0	0.953947	0	-7.36438	0.123669	NA	44.9471	0.317982
C8G	2.39426	6.78447	6.44778	2.86184	5.01279	0.0497703	0.960312	NA	4.58937	4.77414
C8orf31	37.1111	27.1379	31.1643	69.6381	153.391	1.43745	0.0993926	0.246345	32.1245	84.7312
C8orf33	398.645	274.771	463.165	515.131	582.486	0.645608	0.0026025	0.0208081	336.708	520.261
C8orf37	99.3619	49.1874	90.2689	107.796	93.2378	0.413817	0.139	0.306221	74.2746	97.1009
C8orf37-AS1	3.59139	3.39224	4.29852	8.58552	4.01023	0.664315	0.545989	NA	3.49181	5.63142
C8orf44	259.777	183.181	238.568	288.092	157.401	0.0338485	0.908111	0.954243	221.479	228.02
C8orf44-SGK3	0	3.39224	0	0.953947	0	-1.90888	0.329637	NA	1.69612	0.317982
C8orf46	41.8996	117.032	22.5672	57.2368	35.0895	-1.16649	0.0688688	0.193963	79.4659	38.2978
C8orf58	549.483	747.988	517.972	269.967	642.639	-0.48823	0.0399036	0.134029	648.736	476.859
C8orf59	1049.88	620.779	902.689	1348.88	1086.77	0.416175	0.0208187	0.0875345	835.332	1112.78
C8orf76	96.9676	101.767	70.9256	55.3289	67.1713	-0.628945	0.114265	0.270714	99.3673	64.4753
C8orf82	29.9283	25.4418	17.1941	22.8947	46.1176	0.0608438	0.906123	0.953297	27.685	28.7355
C8orf88	26.3369	40.7068	46.2091	12.4013	35.0895	-0.225001	0.629966	0.778778	33.5219	31.2333
C9	4.78852	1.69612	1.07463	0	2.00511	-1.64995	0.385922	NA	3.24232	1.02658
C9orf106	20.3512	40.7068	10.7463	29.5724	19.0486	-0.581375	0.266087	0.462592	30.529	19.7891
C9orf114	335.197	306.997	386.867	324.342	414.056	0.226412	0.345287	0.544369	321.097	375.088
C9orf116	9.57705	3.39224	2.14926	0	5.01279	-2.11767	0.130581	NA	6.48464	2.38735
C9orf117	8.37992	13.5689	13.9702	10.4934	7.0179	-0.0325198	0.955664	0.977976	10.9744	10.4938
C9orf131	205.907	293.428	255.762	123.059	200.511	-0.404712	0.0888527	0.228906	249.667	193.111
C9orf135	1.19713	0	0	1.90789	0	-0.729292	0.866732	NA	0.598565	0.635965
C9orf139	410.616	396.892	214.926	350.099	144.368	-0.819022	0.01206	0.0608903	403.754	236.464
C9orf142	68.2365	74.6292	106.388	51.5131	71.1816	0.0995473	0.85983	0.930672	71.4328	76.361
C9orf152	3.59139	1.69612	9.67167	0.953947	6.01534	0.479138	0.688426	NA	2.64376	5.54699
C9orf153	8.37992	15.2651	9.67167	2.86184	5.01279	-1.23698	0.121485	NA	11.8225	5.84877
C9orf156	712.293	1475.62	1257.32	901.48	608.552	-0.206302	0.514753	0.693905	1093.96	922.45
C9orf16	37.1111	42.403	19.3433	48.6513	52.133	-0.0281347	0.9514	0.976109	39.757	40.0425
C9orf163	1.19713	1.69612	1.07463	0.953947	0	-1.1705	0.639639	NA	1.44662	0.676192
C9orf171	2.39426	3.39224	3.22389	0.953947	2.00511	-0.487254	0.743524	NA	2.89325	2.06098
C9orf173-AS1	2.39426	3.39224	5.37315	4.76973	6.01534	0.912906	0.54038	NA	2.89325	5.38608
C9orf24	8.37992	11.8728	3.22389	5.72368	8.02046	-0.849922	0.333345	NA	10.1264	5.65601
C9orf3	153.233	142.474	170.866	119.243	88.225	-0.243878	0.326568	0.525635	147.853	126.112
C9orf40	227.455	227.28	124.657	108.75	109.279	-0.996828	1.16785e-05	0.000453234	227.367	114.229
C9orf41	247.806	176.396	262.21	341.513	274.701	0.468765	0.0293675	0.109293	212.101	292.808
C9orf41-AS1	22.7455	16.9612	35.4628	18.125	22.0563	0.29974	0.49072	0.674499	19.8533	25.2147
C9orf43	17.957	13.5689	13.9702	15.2632	10.0256	-0.264057	0.660704	0.800506	15.763	13.0863
C9orf47	202.315	50.8835	46.2091	326.25	62.1585	-0.164301	0.788041	0.885332	126.599	144.872
C9orf64	178.373	188.269	110.687	610.526	74.1892	-0.00112281	0.99776	0.999271	183.321	265.134
C9orf66	108.939	171.308	64.4778	70.5921	103.263	-0.782594	0.0158562	0.0727565	140.123	79.4444
[truncated: 16,994 more rows]

## Sheet: significantly regulated genes
Gene	ID1_1st	ID6_1st	ID7_1st	ID14_1st	ID24_1st	log2FoldChange	pvalue	padj	meanNon_vaccine	meanNon_vaccine_young
CCDC68	1.19713	3.39224	706.032	20.0329	9.02302	5.64356	4.68469e-05	0.00123034	2.29468	245.029
CLNK	1.19713	3.39224	353.553	15.2632	15.0384	4.77282	1.72974e-05	0.000590019	2.29468	127.952
GBP1P1	25.1397	32.2262	24.7165	357.73	1907.87	4.62846	0.000139522	0.00264518	28.683	763.438
IL31RA	4.78852	10.1767	10.7463	32.4342	402.025	4.60507	4.13893e-05	0.00111502	7.48262	148.402
OTOF	83.7992	66.1486	33.3135	331.974	5228.34	4.5114	0.00150949	0.014411	74.9739	1864.54
PAX8-AS1	98.1647	6.78447	1307.82	743.125	329.841	4.24669	0.00264609	0.021092	52.4746	793.597
IL4I1	1.19713	1.69612	5.37315	9.53947	53.1355	4.21829	0.00289718	0.022432	1.44662	22.6827
LOC728989	7.18279	1.69612	39.7613	23.8487	136.348	3.85164	0.000174062	0.00311899	4.43945	66.6526
TLR3	4.78852	1.69612	21.4926	100.164	15.0384	3.60812	1.87357e-05	0.000622367	3.24232	45.5651
CXCL10	38.3082	5.08835	6.44778	591.447	353.903	3.47291	0.00622244	0.0382595	21.6983	317.266
IFI44L	9087.42	4085.95	5013.15	40108.7	151830	3.29181	0.00356306	0.0259115	6586.68	65650.7
FAM153B	44.2938	16.9612	62.3285	58.1908	662.69	3.25607	0.00301471	0.0230349	30.6275	261.07
ZNF702P	16.7598	1.69612	16.1194	184.112	51.1304	3.14679	0.00489003	0.0324739	9.22798	83.7872
SPATS2L	221.469	132.297	463.165	710.69	3996.19	3.10181	3.85151e-05	0.00106504	176.883	1723.35
ABCA6	53.8709	32.2262	1668.9	138.322	11.0281	3.07162	0.000912638	0.0101412	43.0486	606.084
FRMD6	2.39426	3.39224	21.4926	16.2171	31.0793	3.03505	0.00117222	0.0121798	2.89325	22.9297
SNORA38B	1.19713	5.08835	24.7165	17.171	26.0665	2.96875	0.000170688	0.00307344	3.14274	22.6513
LOC101926935	2.39426	1.69612	29.015	8.58552	13.0332	2.95909	0.00664746	0.0399922	2.04519	16.8779
LINC00925	27.534	37.3146	468.539	177.434	104.266	2.88049	2.34416e-06	0.000139363	32.4243	250.08
C1QA	71.8279	42.403	204.18	548.519	409.043	2.81312	7.39271e-05	0.00169944	57.1154	387.248
FAM153A	41.8996	11.8728	51.5822	85.8552	299.765	2.79524	0.00181185	0.0163452	26.8862	145.734
LRRC16A	94.5733	16.9612	815.644	200.329	175.448	2.76231	1.54247e-05	0.000546179	55.7673	397.14
TGM2	8.37992	5.08835	7.52241	68.6842	77.1969	2.74452	0.00245762	0.0200902	6.73414	51.1345
NUP210L	44.2938	101.767	106.388	29.5724	1502.83	2.73745	0.00417437	0.0288962	73.0305	546.265
SNORD116-24	3.59139	1.69612	36.5374	7.63158	17.0435	2.68413	0.00233522	0.0193872	2.64376	20.4042
RTP4	135.276	100.071	61.2539	1055.07	1430.65	2.67177	0.000181878	0.0032074	117.673	848.989
AXL	7.18279	10.1767	15.0448	68.6842	89.2276	2.6651	0.000903943	0.0100761	8.67975	57.6522
ADTRP	119.713	127.209	1572.18	269.967	1115.85	2.66111	6.83403e-08	9.92137e-06	123.461	985.999
FAM225A	9.57705	20.3534	4.29852	83.9473	188.481	2.61208	0.00378566	0.0270043	14.9652	92.2422
HPCAL4	19.1541	30.5301	101.015	111.612	267.683	2.5896	0.000323103	0.00490073	24.8421	160.103
SORCS3	9.57705	5.08835	29.015	23.8487	63.1611	2.5559	0.00631731	0.0386006	7.3327	38.6749
C1QC	7.18279	10.1767	26.8657	61.0526	60.1534	2.54425	0.00522504	0.0341064	8.67975	49.3573
MDS2	51.4766	22.0495	701.733	74.4079	122.312	2.53633	1.32744e-05	0.000489286	36.7631	299.484
RNF144A-AS1	43.0967	32.2262	23.6419	50.5592	680.736	2.52579	0.00899127	0.0493434	37.6615	251.646
PCDH1	7.18279	6.78447	45.1345	52.4671	24.0614	2.52469	0.00333791	0.024698	6.98363	40.5543
GBP4	1217.48	997.317	1480.84	3784.31	13752.1	2.49049	0.000136208	0.00261715	1107.4	6339.08
ERAP2	1795.7	885.374	7229.04	4967.2	8741.3	2.44604	1.18227e-05	0.000454492	1340.54	6979.18
NHLRC1	2.39426	3.39224	13.9702	28.6184	5.01279	2.44484	0.00799769	0.0453687	2.89325	15.8671
CCR7	397.447	149.258	1179.94	1043.62	1752.47	2.42883	1.36749e-06	9.40387e-05	273.353	1325.34
C2	213.089	72.9331	150.448	1665.59	921.35	2.38284	0.000103894	0.00218358	143.011	912.463
ANTXRLP1	20.3512	11.8728	109.612	50.5592	89.2276	2.3812	2.66129e-06	0.000150849	16.112	83.133
ZNF221	10.7742	6.78447	59.1046	59.1447	17.0435	2.37979	0.000218906	0.0036825	8.77933	45.0976
SLC16A10	11.9713	8.48059	49.433	37.2039	59.1509	2.35202	0.000407368	0.0057181	10.226	48.5959
LAMP3	56.2652	96.6787	60.1793	73.4539	1098.8	2.31564	0.00759859	0.0438653	76.4719	410.812
IGFBP4	14.3656	5.08835	59.1046	33.3881	53.1355	2.30758	0.00091713	0.0101626	9.72696	48.5428
PSMA8	2.39426	6.78447	21.4926	25.7566	17.0435	2.2993	0.00546467	0.0350145	4.58937	21.4309
LOC101927418	2.39426	5.08835	15.0448	27.6645	11.0281	2.28937	0.0059349	0.0369552	3.74131	17.9125
TTC24	35.9139	13.5689	195.583	99.2105	65.1662	2.28838	0.000410472	0.00574389	24.7414	119.986
GBP5	9328.04	13750.4	16885.7	36015.3	111372	2.25403	0.000424233	0.00588633	11539.2	54757.7
KRT73	22.7455	18.6573	117.135	148.816	46.1176	2.2458	0.00487419	0.0323961	20.7014	104.023
CNTNAP2	71.8279	16.9612	299.822	56.2829	225.575	2.23108	0.00705161	0.0416744	44.3945	193.893
TKTL1	106.545	49.1874	450.27	421.645	167.427	2.22916	0.000333759	0.00499809	77.866	346.447
C1QB	43.0967	39.0107	96.7167	313.849	173.442	2.22901	0.00485151	0.0323092	41.0537	194.669
SYDE2	27.534	6.78447	47.2837	59.1447	95.2429	2.22013	0.00122819	0.0125615	17.1592	67.2238
SDK2	44.2938	16.9612	202.03	68.6842	148.378	2.17479	0.000129272	0.00252285	30.6275	139.698
TMEM30B	15.5627	18.6573	70.9256	33.3881	138.353	2.17004	0.000200889	0.00345746	17.11	80.8889
FBLN7	8.37992	1.69612	19.3433	9.53947	36.0921	2.16621	0.00537426	0.0346619	5.03802	21.6583
LOC100129461	5.98565	3.39224	23.6419	21.9408	17.0435	2.13474	0.00152448	0.0144951	4.68895	20.8754
XAF1	7601.78	5346.16	4210.4	20299	63064.9	2.13036	0.00282805	0.0220492	6473.97	29191.4
RUFY4	124.502	94.9826	74.1495	497.96	947.417	2.12777	0.000319045	0.0048566	109.742	506.509
GBP1	3948.14	5892.31	4238.34	18200.4	39456.6	2.0751	0.00288669	0.022384	4920.23	20631.8
OBSCN	112.53	62.7564	267.583	129.737	687.754	2.06397	0.00048629	0.006456	87.6433	361.691
EDAR	51.4766	20.3534	82.7465	61.0526	256.655	2.05786	0.00310358	0.0235305	35.915	133.485
TUBA3D	10.7742	11.8728	56.9554	25.7566	60.1534	2.05665	4.86391e-05	0.00125844	11.3235	47.6218
ADH6	10.7742	1.69612	48.3583	11.4474	24.0614	2.04204	0.00168433	0.015621	6.23515	27.9557
ST3GAL5-AS1	8.37992	1.69612	16.1194	35.296	15.0384	2.03229	0.00420564	0.0290742	5.03802	22.1513
BOLL	7.18279	3.39224	46.2091	14.3092	15.0384	2.02887	0.00871309	0.0481539	5.28751	25.1855
TLR7	249.003	147.562	85.9704	1492.93	1329.39	2.01552	0.00045735	0.00619787	198.283	969.429
FILIP1L	41.8996	3.39224	85.9704	116.382	53.1355	2.00636	0.00322808	0.0241506	22.6459	85.1625
LINC01260	20.3512	13.5689	35.4628	57.2368	99.2532	2.00515	0.00128043	0.0129584	16.9601	63.9843
APOL6	9951.75	11364	16430	33660	79406.5	1.99225	0.000301199	0.0046665	10657.9	43165.5
BATF2	239.426	278.163	270.807	1325.99	1643.19	1.97487	0.00756797	0.0437853	258.795	1079.99
CA6	70.6307	27.1379	126.806	111.612	275.703	1.96986	0.00292714	0.0226082	48.8843	171.374
TSHZ2	146.05	45.7952	147.224	264.243	534.363	1.96238	0.000221979	0.00371839	95.9226	315.277
ENC1	1273.75	1163.54	12949.3	2378.19	2534.46	1.95467	0.000773266	0.00903077	1218.64	5953.98
TMPRSS6	13.1684	10.1767	51.5822	20.0329	68.1739	1.93438	0.00408665	0.0284523	11.6726	46.5963
CD28	726.658	496.963	1603.35	999.736	4339.07	1.92224	0.00013729	0.00262509	611.811	2314.05
LAP3	3573.44	2335.55	1829.02	8445.29	26203.8	1.91299	0.00737527	0.0430838	2954.5	12159.4
IL17RE	10.7742	6.78447	47.2837	24.8026	29.0742	1.91014	0.00373392	0.0267495	8.77933	33.7202
LOC400685	10.7742	15.2651	82.7465	41.0197	27.069	1.90665	0.00041357	0.00576901	13.0196	50.2784
ZXDA	120.91	96.6787	514.748	249.934	504.286	1.89378	2.39356e-20	3.75286e-16	108.794	422.989
ISPD	8.37992	10.1767	38.6867	37.2039	25.0639	1.87978	0.0040558	0.0282752	9.27831	33.6515
OLMALINC	10.7742	5.08835	54.8061	15.2632	27.069	1.87834	0.00529587	0.0343664	7.93127	32.3794
USP51	16.7598	10.1767	27.9404	35.296	80.2046	1.87808	0.0010642	0.0112893	13.4683	47.8137
NEDD4L	69.4336	33.9224	305.195	146.908	154.394	1.87475	5.08345e-06	0.000240796	51.678	202.166
NBPF3	86.1934	94.9826	495.404	320.526	232.593	1.87353	0.000542452	0.00698285	90.588	349.508
CD274	535.118	676.751	413.732	1919.34	5535.12	1.87038	0.0043412	0.0296841	605.934	2622.73
OAS2	7158.84	4074.08	2871.41	17186.3	43994.2	1.87016	0.00825555	0.0463022	5616.46	21350.6
INPP4B	232.243	137.386	499.703	393.98	1054.69	1.86643	5.7996e-06	0.000263571	184.814	649.458
GIMAP7	483.641	218.799	283.702	6610.85	870.22	1.86204	5.61162e-06	0.000259169	351.22	2588.26
CDCP1	23.9426	6.78447	10.7463	79.1776	96.2455	1.84834	0.00869414	0.0480831	15.3635	62.0565
DHX58	271.749	245.937	327.762	654.408	1793.57	1.84737	0.00242326	0.0198819	258.843	925.248
MKRN2OS	9.57705	10.1767	35.4628	24.8026	42.1074	1.83607	0.000884246	0.009967	9.87688	34.1243
ST14	136.473	78.0214	318.09	540.888	293.749	1.82354	0.000630223	0.00782985	107.247	384.243
ADAMTS6	27.534	30.5301	148.299	82.0394	82.2097	1.81969	0.000210565	0.00358463	29.0321	104.183
CAMK4	135.276	106.855	250.389	293.816	724.849	1.81666	0.000417954	0.00581981	121.066	423.018
EML6	243.018	125.513	4808.97	118.289	334.854	1.81063	0.00654993	0.0395899	184.265	1754.04
PLEKHA7	35.9139	27.1379	367.523	36.25	86.2199	1.80245	0.00291965	0.0225615	31.5259	163.331
HAVCR1	27.534	25.4418	79.5226	141.184	65.1662	1.78773	0.000257878	0.00414983	26.4879	95.291
SLC35G1	11.9713	8.48059	29.015	49.6052	26.0665	1.7877	0.000944395	0.0103186	10.226	34.8956
THAP7	10.7742	11.8728	44.0598	26.7105	48.1227	1.7862	0.000107927	0.00222656	11.3235	39.631
TCF4	1333.6	295.125	7864.14	1348.88	2127.43	1.76491	0.0086919	0.0480831	814.364	3780.15
USP44	28.7311	27.1379	157.971	60.0987	87.2225	1.76233	0.000930158	0.0102343	27.9345	101.764
CD101	147.247	181.485	177.314	1548.26	556.419	1.74707	1.66279e-09	4.91904e-07	164.366	760.663
ICOS	350.759	111.944	344.956	364.408	1377.51	1.74701	0.00262988	0.0209735	231.352	695.626
GBP6	79.0106	169.612	132.179	248.98	724.849	1.73796	0.00664311	0.0399836	124.311	368.67
MYC	344.774	261.202	285.852	952.993	1772.52	1.73156	0.00123636	0.0126122	302.988	1003.79
GBP3	1186.36	647.917	1092.9	2902.86	5295.51	1.72754	0.00136242	0.0135128	917.137	3097.09
TCEA3	52.6738	20.3534	117.135	57.2368	185.473	1.72639	0.00147342	0.0141641	36.5136	119.948
AKAP5	113.727	86.502	552.36	292.862	205.524	1.71353	0.00170414	0.0157375	100.115	350.249
RDH13	69.4336	28.834	144	156.447	155.396	1.71159	8.24392e-07	6.3052e-05	49.1338	151.948
PTPRO	266.96	93.2865	458.867	980.657	372.951	1.70536	0.000256238	0.00413755	180.123	604.159
ZNF813	74.2221	39.0107	154.747	240.395	140.358	1.70497	1.65423e-05	0.000572554	56.6164	178.5
CCR8	4.78852	10.1767	8.59704	50.5592	25.0639	1.69659	0.00748182	0.043399	7.48262	28.0734
CCDC144B	159.218	228.976	909.137	673.487	236.604	1.68326	0.000710926	0.00851536	194.097	606.409
CARD17	108.939	291.732	196.657	367.27	1112.84	1.67123	0.00663998	0.0399801	200.336	558.922
LOC101928370	14.3656	6.78447	23.6419	46.7434	31.0793	1.66911	0.00241985	0.0198643	10.575	33.8215
LINC00920	25.1397	3.39224	33.3135	69.6381	25.0639	1.66229	0.00579854	0.0362851	14.266	42.6719
ANO5	38.3082	20.3534	32.2389	225.131	99.2532	1.654	0.0017125	0.0157652	29.3308	118.875
ZNF483	43.0967	35.6185	128.956	64.8684	187.478	1.64868	7.15093e-06	0.000309722	39.3576	127.101
MYOF	755.39	256.114	282.628	3050.72	2187.58	1.63889	0.00266004	0.0211817	505.752	1840.31
SDC3	61.0537	40.7068	55.8808	272.829	214.547	1.63638	0.000329609	0.00496246	50.8803	181.086
TCF7	829.612	956.611	1588.3	1613.12	5754.68	1.63016	0.00506715	0.0332975	893.111	2985.37
ENPP2	26.3369	39.0107	96.7167	62.0066	147.376	1.62675	0.00169656	0.0156938	32.6738	102.033
MIR4712	113.727	42.403	217.075	214.638	240.614	1.62585	0.00902918	0.049498	78.0652	224.109
RNF157	317.24	174.7	409.434	437.862	1273.25	1.60946	0.000926391	0.010221	245.97	706.848
IFIT5	1149.25	1718.17	1264.84	4180.2	7639.49	1.60617	0.00313892	0.0237295	1433.71	4361.51
LOC101929162	38.3082	69.5408	330.986	82.9934	132.338	1.60065	4.70457e-05	0.00123349	53.9245	182.106
ZNF496	93.3762	78.0214	170.866	127.829	529.35	1.59566	0.00433024	0.029635	85.6988	276.015
HIVEP3	158.021	186.573	479.285	322.434	748.91	1.59497	6.49279e-05	0.00153545	172.297	516.876
FZD5	74.2221	57.668	48.3583	250.888	350.895	1.59141	0.00258205	0.0206867	65.9451	216.714
MOV10	1203.12	1109.26	1358.33	1865.92	7494.12	1.58997	0.00368946	0.0265678	1156.19	3572.79
ZNF32-AS2	26.3369	57.668	164.418	100.164	116.297	1.58919	1.36336e-05	0.000498277	42.0024	126.96
NELL2	249.003	174.7	408.359	626.743	897.289	1.58708	0.00321154	0.0240714	211.852	644.13
MIR641	10.7742	10.1767	33.3135	33.3881	26.0665	1.58667	0.0063687	0.0388114	10.4754	30.9227
ALS2CL	102.953	47.4913	135.403	151.678	325.831	1.58649	0.00772446	0.0443146	75.2223	204.304
PEX5L	22.7455	10.1767	54.8061	17.171	94.2404	1.5835	0.0017655	0.0160844	16.4611	55.4058
ZNF879	57.4623	28.834	139.702	170.757	77.1969	1.57872	1.67721e-05	0.000577956	43.1481	129.218
CDHR3	25.1397	16.9612	69.8509	28.6184	91.2327	1.57716	0.00183129	0.0163852	21.0505	63.234
BCAS4	37.1111	28.834	165.493	69.6381	72.1841	1.57162	0.00136583	0.0135195	32.9725	102.438
PLAC8	2452.92	2294.85	4068.55	5910.66	11163.5	1.56792	4.50188e-05	0.00119231	2373.88	7047.56
ZNF614	68.2365	106.855	236.419	291.908	243.621	1.5667	3.04693e-07	2.91297e-05	87.546	257.316
ZNF286B	57.4623	28.834	145.075	110.658	115.294	1.5641	4.66472e-07	4.04638e-05	43.1481	123.676
GCH1	1474.87	1168.63	1728	2683.45	7559.28	1.56259	0.0028415	0.0221183	1321.75	3990.25
RNF157-AS1	34.7168	32.2262	58.03	41.0197	203.519	1.558	0.00889156	0.0489152	33.4715	100.856
USP30-AS1	94.5733	71.237	294.449	160.263	312.798	1.55375	1.07012e-09	3.49369e-07	82.9052	255.837
CABP4	38.3082	22.0495	144	47.6973	101.258	1.55184	0.0035513	0.0258715	30.1789	97.652
LIPT2	8.37992	15.2651	33.3135	31.4802	35.0895	1.5452	0.00250914	0.0203206	11.8225	33.2944
ABCD2	172.387	72.9331	344.956	228.947	448.143	1.54424	1.6393e-06	0.00010665	122.66	340.682
TBC1D4	802.078	276.467	840.361	1052.2	2111.39	1.54265	0.000182064	0.0032074	539.272	1334.65
RORA-AS1	62.2508	30.5301	197.732	51.5131	209.534	1.53116	1.54427e-05	0.000546179	46.3905	152.926
GPRIN3	1163.61	932.865	2997.14	1651.28	4656.88	1.5307	3.54826e-06	0.000183608	1048.24	3101.77
S1PR1	381.885	422.333	862.928	2073.88	796.03	1.5248	0.00776471	0.0444642	402.109	1244.28
PNPLA7	59.8565	13.5689	95.6421	73.4539	109.279	1.52406	0.00778872	0.0445691	36.7127	92.7916
CD2AP	912.214	705.585	1308.9	1761.94	3953.08	1.51876	0.000273364	0.00434253	808.899	2341.31
HERC6	1055.87	851.451	821.017	2035.72	5390.75	1.51814	0.00645539	0.0391248	953.66	2749.16
CLCN2	23.9426	23.7457	87.045	57.2368	60.1534	1.51196	1.28636e-05	0.000483666	23.8441	68.1451
ZNF845	203.512	242.545	552.36	804.177	560.43	1.51178	9.43064e-11	5.28082e-08	223.029	638.989
SCN8A	28.7311	27.1379	74.1495	72.5	88.225	1.50667	0.004772	0.0318971	27.9345	78.2915
SMA4	141.261	98.3749	391.165	247.072	381.974	1.50568	0.00587117	0.0366457	119.818	340.071
ZNF268	246.609	169.612	665.196	683.026	404.031	1.50536	4.12963e-08	6.47484e-06	208.11	584.084
PDGFRB	55.068	44.0991	198.807	99.2105	129.33	1.50406	0.0011293	0.0118282	49.5835	142.449
ZFP82	63.4479	22.0495	159.045	114.474	64.1637	1.49581	0.00224416	0.0188061	42.7487	112.561
ZNF35	69.4336	52.5797	212.777	169.803	135.345	1.49425	7.49837e-07	5.9811e-05	61.0066	172.641
ACCS	610.537	276.467	1012.3	783.19	1907.87	1.49235	0.00100946	0.0108597	443.502	1234.45
GPRASP1	1268.96	502.051	3496.85	1084.64	3195.15	1.49014	8.87496e-06	0.000369099	885.505	2592.21
APOL3	1405.43	581.769	1399.17	3820.56	3274.35	1.48952	2.91734e-05	0.00086795	993.6	2831.36
ZDBF2	243.018	71.237	535.166	297.631	429.095	1.48852	4.82388e-06	0.000233264	157.127	420.631
ZXDB	383.082	493.57	1606.57	523.717	1980.05	1.48749	3.95846e-08	6.38579e-06	438.326	1370.11
ZKSCAN2	119.713	94.9826	260.06	277.599	355.908	1.47625	1.06961e-08	2.20662e-06	107.348	297.856
EXPH5	32.3225	35.6185	70.9256	93.4868	113.289	1.45763	0.00582178	0.0363954	33.9705	92.5671
FAM110B	32.3225	55.9719	137.553	85.8552	125.32	1.44864	0.00427486	0.029355	44.1472	116.243
ZNF765	167.598	167.916	406.21	637.237	343.877	1.43376	7.67959e-08	1.04917e-05	167.757	462.441
TNFRSF10A	320.831	152.651	625.435	597.171	616.573	1.43053	4.04278e-08	6.4027e-06	236.741	613.059
MAF	584.2	279.86	865.077	1536.81	985.514	1.42192	8.73306e-07	6.58296e-05	432.03	1129.13
ABCB1	181.964	184.877	706.032	622.927	319.816	1.42121	0.00141237	0.0138506	183.42	549.592
BCDIN3D-AS1	17.957	13.5689	47.2837	38.1579	42.1074	1.41685	0.000892988	0.0100188	15.763	42.5163
ZNF239	31.1254	11.8728	41.9106	67.7302	64.1637	1.41316	0.00133099	0.0132836	21.4991	57.9348
ZIK1	105.348	28.834	196.657	194.605	82.2097	1.40469	0.00140314	0.013807	67.0908	157.824
ATP10A	302.874	251.025	539.464	694.473	952.429	1.4017	1.47653e-05	0.000534653	276.95	728.789
ZFP1	104.15	96.6787	212.777	290	291.744	1.40107	9.18105e-08	1.17992e-05	100.415	264.84
SNORD11	31.1254	13.5689	102.09	22.8947	86.2199	1.3998	0.00167414	0.0155411	22.3472	70.4015
SNORA71B	34.7168	25.4418	110.687	47.6973	86.2199	1.39594	0.00021416	0.00362224	30.0793	81.5347
CTLA4	330.408	167.916	531.942	444.539	892.276	1.39175	0.00141342	0.0138506	249.162	622.919
TNFRSF25	405.827	279.86	481.434	555.197	1579.03	1.39153	0.00487407	0.0323961	342.843	871.886
MAN1C1	95.7705	71.237	91.3435	235.625	328.839	1.38615	0.00556432	0.0353722	83.5037	218.602
ZNF823	35.9139	16.9612	55.8808	104.934	46.1176	1.38276	0.00126385	0.0128424	26.4376	68.9775
ZNF689	118.516	144.17	294.449	335.789	385.985	1.37792	1.01623e-10	5.49431e-08	131.343	338.741
TRABD2A	682.365	249.329	661.972	602.894	1898.84	1.37628	0.00908024	0.0496925	465.847	1054.57
BMPR1A	82.602	66.1486	328.837	124.013	170.435	1.37448	0.000239271	0.0039201	74.3753	207.762
GRWD1	64.6451	52.5797	145.075	136.414	173.442	1.37223	0.000109369	0.00224744	58.6124	151.644
CD81-AS1	21.5484	16.9612	64.4778	33.3881	61.156	1.36713	0.00118625	0.0122525	19.2548	53.0073
AGPAT5	439.347	162.827	1085.38	800.361	309.79	1.36055	0.000630907	0.00783214	301.087	731.843
SGOL1	63.4479	59.3641	178.389	76.3158	245.627	1.35905	1.59186e-05	0.000554639	61.406	166.777
PLCXD2	88.5877	59.3641	295.523	103.026	205.524	1.35543	1.19769e-06	8.49713e-05	73.9759	201.358
DIEXF	310.057	276.467	714.629	678.256	848.163	1.35095	3.41488e-09	8.77736e-07	293.262	747.016
ZNF525	199.921	111.944	472.837	356.776	344.88	1.34662	1.04427e-07	1.28922e-05	155.932	391.498
ZNF781	22.7455	11.8728	47.2837	48.6513	29.0742	1.34652	0.00295566	0.0226944	17.3092	41.6697
SDR42E1	40.7025	42.403	111.762	70.5921	138.353	1.34573	0.000705143	0.0084794	41.5527	106.902
LAX1	538.709	308.694	1392.72	1070.33	619.58	1.33605	0.00333034	0.0246615	423.701	1027.54
AIM2	1019.96	1975.98	2497.44	4285.13	3642.29	1.33604	0.00230859	0.0192534	1497.97	3474.95
ZNF225	110.136	52.5797	184.836	379.671	72.1841	1.33563	0.000641592	0.00794591	81.3579	212.23
ZNF43	336.394	189.965	773.733	690.658	511.304	1.33289	4.67728e-06	0.000227749	263.18	658.565
CLUHP3	148.444	167.916	442.747	177.434	682.741	1.33254	0.0024376	0.0199682	158.18	434.308
KNOP1	39.5053	28.834	55.8808	121.151	87.2225	1.32849	0.000252929	0.00409677	34.1697	88.0848
TESPA1	824.823	481.698	1028.42	1251.58	2415.16	1.32746	0.00132248	0.0132199	653.26	1565.05
ZNF304	208.301	147.562	426.628	482.697	390.997	1.3247	1.55039e-05	0.000546179	177.932	433.441
SOCS3	2190.75	4187.72	10570.1	2696.81	13529.5	1.32138	0.000904212	0.0100761	3189.23	8932.13
CA11	125.699	54.2758	276.18	144.046	244.624	1.32055	5.00347e-06	0.000237725	89.9873	221.617
IL2RA	226.258	113.64	749.017	250.888	370.946	1.31919	0.000386166	0.00553952	169.949	456.95
BMPR2	1347.97	761.557	2273.92	3141.35	2439.22	1.31758	1.02942e-07	1.28098e-05	1054.76	2618.16
BISPR	533.92	456.256	710.33	1197.2	1856.74	1.31696	0.000581948	0.00737025	495.088	1254.76
ZNF829	65.8422	45.7952	159.045	160.263	93.2378	1.31584	0.000583148	0.00737948	55.8187	137.515
TOX	175.978	127.209	625.435	270.921	290.742	1.31525	0.00146852	0.0141641	151.594	395.699
RCAN3	628.494	364.665	695.286	916.743	1894.83	1.31333	0.00292882	0.0226101	496.58	1168.95
GAREML	17.957	13.5689	52.6569	27.6645	42.1074	1.31308	0.00316832	0.0238827	15.763	40.8096
ZNF624	105.348	94.9826	184.836	421.645	189.483	1.30694	2.3697e-05	0.00074458	100.165	265.321
CCDC94	167.598	262.898	458.867	465.526	639.632	1.30316	3.22311e-07	2.99025e-05	215.248	521.342
LDOC1L	216.681	301.909	888.719	641.052	472.204	1.30051	0.00128082	0.0129584	259.295	667.325
CSTF2T	1045.1	917.6	2084.78	2526.05	2618.68	1.29631	6.09547e-12	7.35161e-09	981.348	2409.84
NRAV	33.5197	20.3534	76.2987	62.0066	56.1432	1.28565	0.00145539	0.0141294	26.9365	64.8162
GEMIN4	143.656	161.131	354.628	368.224	387.99	1.28552	4.70244e-10	1.94025e-07	152.393	370.28
HDX	51.4766	28.834	79.5226	110.658	110.281	1.28315	0.000247248	0.00402973	40.1553	100.154
EML5	162.81	86.502	375.046	179.342	357.913	1.27998	0.000129713	0.00252285	124.656	304.1
SLC16A7	1158.82	932.865	2063.29	3263.45	2381.07	1.27862	1.24195e-11	1.0818e-08	1045.84	2569.27
LINC00476	314.845	167.916	581.375	577.138	539.376	1.27704	0.00455971	0.030842	241.381	565.963
KLF8	391.462	161.131	1877.38	269.013	473.207	1.27221	0.00453758	0.0307449	276.297	873.199
LOC100130950	88.5877	32.2262	145.075	227.039	56.1432	1.26656	0.00651857	0.0394613	60.407	142.753
FLJ27354	15.5627	15.2651	48.3583	23.8487	43.11	1.26525	0.00221584	0.0186485	15.4139	38.439
SNORA68	20.3512	15.2651	50.5076	29.5724	54.1381	1.26458	0.00495694	0.0327517	17.8081	44.7393
FZD3	141.261	72.9331	397.613	153.585	265.678	1.26211	3.14183e-05	0.000915627	107.097	272.292
ZNF551	195.132	179.789	687.763	322.434	406.036	1.2606	3.21652e-07	2.99025e-05	187.46	472.078
ZNF416	39.5053	33.9224	102.09	102.072	54.1381	1.25407	0.000277657	0.00440626	36.7138	86.1001
MPHOSPH9	568.637	430.814	1479.77	1073.19	1029.63	1.2532	3.76508e-16	1.47582e-12	499.726	1194.19
SH3PXD2A	457.304	208.623	961.794	683.98	631.611	1.25069	4.11859e-06	0.000205001	332.963	759.128
KPNA5	328.014	145.866	758.689	393.98	568.45	1.25052	4.12853e-10	1.83464e-07	236.94	573.706
ZNF675	274.143	140.778	569.554	476.02	399.018	1.25042	2.72692e-06	0.000152155	207.46	481.53
TBC1D9	736.236	446.079	1939.71	1493.88	793.023	1.24748	0.00071164	0.00851741	591.157	1408.87
BRSK1	33.5197	16.9612	37.612	78.2236	71.1816	1.24654	0.00685386	0.0409066	25.2404	62.3391
TAS2R5	35.9139	40.7068	89.1943	74.4079	107.274	1.24653	0.000119041	0.0023837	38.3104	90.2919
KIF5C	132.882	61.0603	133.254	165.987	326.834	1.24581	0.00365031	0.0263748	96.9709	208.692
ZNF354C	159.218	101.767	400.837	264.243	259.662	1.24436	7.97459e-08	1.0507e-05	130.493	308.248
CENPK	150.838	132.297	342.807	264.243	403.028	1.24137	0.00235859	0.019525	141.568	336.693
CUL1	1777.74	1319.58	2197.62	3741.38	5141.11	1.24018	0.000114245	0.00231727	1548.66	3693.37
KLF11	805.669	1596.05	2645.74	2175	3573.11	1.23974	0.000116213	0.00233903	1200.86	2797.95
DOCK10	2510.38	1333.15	4057.8	4238.39	4950.63	1.23947	2.36656e-06	0.00014002	1921.77	4415.61
TMEM102	45.491	16.9612	45.1345	152.632	63.1611	1.23525	0.000259511	0.00415615	31.2261	86.9757
MTMR8	40.7025	20.3534	76.2987	65.8223	71.1816	1.232	0.000392138	0.0056026	30.5279	71.1009
CAMK2D	1082.21	357.881	2286.81	1429.01	1258.21	1.22474	0.00146714	0.0141641	720.044	1658.01
MANEA-AS1	79.0106	39.0107	114.985	169.803	119.304	1.21978	6.81512e-05	0.00159962	59.0107	134.697
FOXO3B	64.6451	76.3253	267.583	123.059	136.348	1.21894	0.000605465	0.00759519	70.4852	175.663
ALKBH8	287.311	145.866	413.732	471.25	581.483	1.21395	1.64972e-08	3.11637e-06	216.589	488.822
SCIMP	672.788	393.499	992.958	2547.04	588.501	1.21247	0.000391876	0.0056026	533.144	1376.17
GTF2H4	259.777	166.22	778.032	454.079	260.665	1.21024	5.87017e-05	0.00144236	212.998	497.592
KCNA3	3743.43	1984.46	5157.15	4195.46	9734.83	1.20791	0.000720238	0.00859407	2863.94	6362.48
FLNB	600.96	329.047	1156.3	1003.55	985.514	1.20723	1.49145e-06	9.95086e-05	465.003	1048.46
ZNF599	38.3082	13.5689	81.6719	28.6184	73.1867	1.20512	0.00462731	0.031205	25.9386	61.159
MFHAS1	325.62	157.739	369.673	591.447	617.575	1.20375	2.17472e-06	0.000131144	241.679	526.232
CCR4	140.064	72.9331	180.538	344.375	207.529	1.20296	0.00277668	0.0218337	106.499	244.147
CASC5	118.516	91.5904	203.105	298.585	228.583	1.20119	0.00898859	0.0493434	105.053	243.424
SMG8	209.498	242.545	336.359	912.927	445.135	1.20117	1.36922e-07	1.59022e-05	226.021	564.807
CTAGE7P	33.5197	11.8728	56.9554	44.8355	52.133	1.20064	0.00182015	0.0163852	22.6962	51.308
METTL8	644.056	249.329	2621.02	522.763	557.422	1.20045	0.00246468	0.0201269	446.693	1233.74
EVL	2087.8	1565.52	4640.25	2731.15	5427.84	1.20011	8.02303e-07	6.23168e-05	1826.66	4266.42
C12orf65	159.218	83.1098	217.075	287.138	310.793	1.19996	1.05069e-06	7.73415e-05	121.164	271.669
SCAMP1-AS1	83.7992	110.248	191.284	208.914	260.665	1.19775	2.23634e-07	2.33757e-05	97.0234	220.288
ZNF649	62.2508	69.5408	156.896	211.776	92.2353	1.1945	0.000103829	0.00218358	65.8958	153.636
GTF3C4	266.96	183.181	454.568	515.131	571.458	1.19314	1.05242e-11	1.06417e-08	225.07	513.719
SCRN1	798.486	318.87	1232.6	1536.81	907.314	1.18619	0.000588194	0.00741939	558.678	1225.57
ZNF92	499.204	437.598	1199.29	919.605	1084.77	1.18406	3.70694e-08	6.11801e-06	468.401	1067.89
SLC18B1	440.544	322.262	1000.48	730.723	883.253	1.18366	2.31413e-09	6.47916e-07	381.403	871.486
SFMBT1	566.243	356.185	1687.17	756.48	793.023	1.18301	2.82157e-06	0.000155773	461.214	1078.89
MIR17HG	58.6594	27.1379	99.9406	136.414	53.1355	1.1822	0.00771958	0.0443132	42.8987	96.4968
FLJ22447	29.9283	39.0107	94.5674	62.0066	79.202	1.18191	0.000982277	0.0106361	34.4695	78.592
FBXO21	417.799	269.683	1059.59	650.592	657.678	1.18073	2.98051e-10	1.4161e-07	343.741	789.285
ZNF337-AS1	26.3369	10.1767	51.5822	43.8816	32.0818	1.17988	0.00744925	0.0432421	18.2568	42.5152
PARP11	842.78	715.762	1191.76	1171.45	3118.96	1.17782	0.00761663	0.0439533	779.271	1827.39
RFX7	1031.93	673.359	1947.23	2020.46	1742.44	1.17775	2.21431e-11	1.65325e-08	852.643	1903.38
NDUFA6-AS1	21.5484	13.5689	52.6569	25.7566	46.1176	1.17597	0.00534691	0.0345518	17.5587	41.5104
TMEM229B	266.96	195.054	294.449	503.684	740.89	1.17564	0.000691961	0.00836489	231.007	513.007
SAMHD1	6017.98	3767.08	4984.13	13212.2	15518.6	1.1748	0.000927977	0.0102218	4892.53	11238.3
CRYBG3	373.505	210.319	439.524	1059.84	595.519	1.1743	3.21334e-06	0.000173134	291.912	698.293
C5orf42	205.907	140.778	423.404	452.171	284.726	1.17014	7.77112e-05	0.00176074	173.342	386.767
SACS	750.601	425.726	1342.21	1346.02	1153.94	1.16976	3.04219e-08	5.12888e-06	588.163	1280.73
BBS12	34.7168	32.2262	36.5374	132.599	76.1944	1.16952	0.00395434	0.0278027	33.4715	81.7768
ANKRD36B	223.863	149.258	557.733	331.02	376.962	1.16812	0.00117725	0.0122158	186.561	421.905
LZTS2	52.6738	30.5301	96.7167	100.164	80.2046	1.1673	0.000315595	0.00482753	41.6019	92.3619
ZHX1	421.39	502.051	941.376	1255.39	934.383	1.16559	4.91995e-14	1.102e-10	461.721	1043.72
DOCK7	172.387	105.159	308.419	355.822	256.655	1.16235	0.000175507	0.00313058	138.773	306.965
KDELC2	168.795	139.082	354.628	357.73	314.803	1.16123	5.2194e-07	4.42351e-05	153.939	342.387
C9orf91	912.214	466.433	917.734	1636.97	2028.17	1.157	0.000178411	0.00317156	689.323	1527.63
ANKRD20A5P	52.6738	72.9331	262.21	101.118	85.2174	1.15371	0.00352981	0.0257653	62.8034	149.515
TSPYL5	89.7848	49.1874	295.523	94.4407	105.269	1.15222	0.00573977	0.0360666	69.4861	165.077
GOLGA2P5	323.225	201.838	934.928	340.559	603.539	1.15151	0.00260586	0.0208243	262.532	626.342
MGC57346	100.559	49.1874	227.822	128.783	141.361	1.15092	0.00073059	0.00868335	74.8732	165.988
P2RX7	600.96	561.415	795.226	1843.98	1381.52	1.15078	0.000172066	0.00308676	581.187	1340.24
PLXNA1	39.5053	25.4418	109.612	20.9868	120.307	1.14963	0.0070806	0.0418093	32.4735	83.6353
LINC01237	46.6881	28.834	126.806	26.7105	133.34	1.14916	0.00895992	0.0492231	37.7611	95.619
MYO9A	463.29	261.202	816.719	797.5	735.877	1.14553	5.67331e-11	3.70633e-08	362.246	783.365
FAM133B	37.1111	23.7457	111.762	38.1579	80.2046	1.14313	0.000272621	0.0043375	30.4284	76.708
N6AMT1	37.1111	16.9612	53.7315	82.0394	34.0869	1.13489	0.00395936	0.0278256	27.0361	56.6193
ZNF510	409.419	273.075	656.599	821.348	735.877	1.13412	2.68104e-09	7.17716e-07	341.247	737.941
ADPRH	373.505	230.672	307.344	1209.6	740.89	1.13388	0.000171138	0.00307362	302.088	752.613
ZNF256	191.541	191.661	843.584	236.579	372.951	1.13298	0.000174333	0.00312028	191.601	484.372
C19orf12	288.509	261.202	533.016	645.822	627.601	1.1303	8.1233e-05	0.00181458	274.855	602.146
SMIM15	462.093	303.605	538.39	1367.96	773.974	1.12996	8.59093e-06	0.000359193	382.849	893.441
MLLT3	243.018	174.7	407.285	298.585	655.672	1.12932	0.00216564	0.0183938	208.859	453.848
LMO7	231.046	120.424	338.508	245.164	531.355	1.12868	0.000562962	0.00718785	175.735	371.676
NT5C3B	119.713	79.7176	285.852	217.5	144.368	1.12421	0.001302	0.0131028	99.7153	215.907
HOOK1	197.527	89.8943	327.762	207.96	354.905	1.12402	0.00431137	0.0295188	143.71	296.876
NBPF12	84.9963	55.9719	203.105	132.599	135.345	1.12335	1.92212e-05	0.000634463	70.4841	157.016
BRIX1	344.774	274.771	741.495	489.375	824.102	1.12137	6.47637e-10	2.3078e-07	309.772	684.99
NR3C2	229.849	122.121	601.793	179.342	466.189	1.12134	0.000473578	0.00633552	175.985	415.775
BCL2	2122.51	1058.38	5364.55	2104.41	3190.14	1.11854	2.88324e-07	2.87939e-05	1590.45	3553.03
ALG11	162.81	179.789	270.807	352.006	491.253	1.11778	3.38119e-05	0.000956926	171.299	371.355
PDE4D	1478.46	2145.59	8550.83	1574.01	4027.27	1.11553	0.00695947	0.0412698	1812.02	4717.37
FASTKD2	514.766	368.058	785.554	1124.7	949.422	1.11281	2.73859e-10	1.34183e-07	441.412	953.227
PHAX	210.695	235.76	411.583	817.533	332.849	1.11186	2.806e-05	0.000844439	223.228	520.655
PASK	317.24	239.153	708.181	482.697	620.583	1.10653	6.62412e-05	0.00155945	278.196	603.82
MRPL39	222.666	105.159	395.464	322.434	328.839	1.10371	0.000120455	0.0024006	163.913	348.912
SEMA4F	102.953	100.071	342.807	137.368	218.557	1.10328	1.90857e-05	0.000631318	101.512	232.911
ERCC4	223.863	154.347	285.852	655.362	325.831	1.10227	3.89129e-07	3.50641e-05	189.105	422.348
HEATR1	747.01	408.764	1251.94	1091.32	1321.37	1.10099	6.71192e-09	1.54759e-06	577.887	1221.54
KANTR	37.1111	37.3146	91.3435	67.7302	80.2046	1.10058	0.0015124	0.0144239	37.2128	79.7595
FANCF	117.319	122.121	190.209	346.283	244.624	1.0997	1.22959e-07	1.4605e-05	119.72	260.372
EXOSC9	553.074	520.708	1032.72	931.052	1490.8	1.09812	3.72188e-09	9.41214e-07	536.891	1151.52
ZNF726	19.1541	30.5301	63.4032	37.2039	60.1534	1.09796	0.00371633	0.0266675	24.8421	53.5868
TWISTNB	247.806	439.295	987.585	388.256	961.452	1.09761	3.93098e-05	0.00107376	343.55	779.098
CHMP7	1565.85	683.536	3502.22	1836.35	1763.5	1.09683	0.000556531	0.00713238	1124.69	2367.35
GDF11	122.107	81.4137	272.956	228.947	145.371	1.0958	7.26917e-05	0.00167608	101.761	215.758
NUP205	1385.08	781.91	1965.5	2238.91	2584.59	1.09433	1.38032e-07	1.59133e-05	1083.5	2263
DNMT1	938.551	810.744	1629.14	1921.25	2038.2	1.09393	4.89416e-18	3.83677e-14	874.648	1862.86
NR1D2	1166.01	1358.59	3022.93	1295.46	4225.78	1.09168	0.000494793	0.00652469	1262.3	2848.06
NCOA7	1456.91	1580.78	2024.6	3966.51	3929.02	1.09168	0.00048311	0.00642839	1518.85	3306.71
IL21R	126.896	86.502	280.478	145.954	266.68	1.09078	0.00222754	0.0187168	106.699	231.038
DDI2	105.348	59.3641	141.851	250.888	149.381	1.08854	1.17116e-06	8.38475e-05	82.3558	180.707
ACACA	411.813	234.064	552.36	710.69	760.941	1.08699	7.88916e-06	0.000333407	322.939	674.664
ZNF468	325.62	457.952	712.48	1048.39	729.862	1.08538	1.57588e-07	1.76487e-05	391.786	830.243
HAVCR2	621.311	517.316	868.301	2236.05	860.194	1.08383	5.6261e-05	0.00140464	569.314	1321.52
DOPEY1	830.809	544.454	1728	1428.06	1188.03	1.08249	1.1899e-11	1.0818e-08	687.631	1448.03
MPHOSPH10	427.376	468.129	831.764	1068.42	951.427	1.08114	8.04277e-12	9.00733e-09	447.752	950.537
LOC100128494	89.7848	62.7564	211.702	183.158	87.2225	1.08111	0.00335714	0.0247935	76.2706	160.694
RHOU	658.422	383.323	382.568	2319.05	1316.36	1.08071	0.00345572	0.0253306	520.872	1339.32
CCDC141	73.025	23.7457	318.09	31.4802	101.258	1.07686	0.00856422	0.0475149	48.3853	150.276
CASP7	530.329	262.898	496.479	1164.77	946.414	1.07447	0.00430292	0.0294738	396.614	869.221
MSANTD4	281.326	149.258	343.882	803.223	283.724	1.07422	5.68095e-05	0.00141608	215.292	476.943
RPL7L1	515.963	395.196	722.151	1643.65	702.793	1.07167	3.78657e-10	1.74617e-07	455.579	1022.86
NAGPA	69.4336	105.159	157.971	190.789	198.506	1.07132	0.000459696	0.00620421	87.2965	182.422
NOC3L	357.942	188.269	516.897	798.454	381.974	1.0686	1.16784e-05	0.000453234	273.106	565.775
SIPA1L3	184.358	110.248	476.061	210.822	284.726	1.0686	0.00410504	0.0285423	147.303	323.87
ZNF480	260.975	173.004	384.717	769.835	274.701	1.06806	0.000357462	0.00527248	216.989	476.418
CCR2	1216.29	546.15	370.747	16658.8	763.949	1.06683	0.00379857	0.0270348	881.218	5931.16
ZNF461	225.061	132.297	609.315	276.645	276.706	1.06664	6.35042e-05	0.00151875	178.679	387.555
TET1	44.2938	28.834	89.1943	81.0855	54.1381	1.06544	0.00439836	0.0300095	36.5639	74.806
CYP2U1	178.373	55.9719	344.956	198.421	153.391	1.06331	0.000993016	0.010708	117.172	232.256
PWAR5	319.634	181.485	822.092	218.454	730.864	1.06242	5.40451e-05	0.00136015	250.559	590.47
MAN1A2	1205.51	837.882	2103.05	2299.97	1948.97	1.06118	9.32392e-11	5.28082e-08	1021.7	2117.33
TULP3	122.107	49.1874	213.851	152.632	146.373	1.06054	0.000527449	0.0068516	85.6474	170.952
PHF10	642.859	425.726	1656	684.934	1193.04	1.06015	4.21246e-10	1.83464e-07	534.292	1177.99
GTPBP8	130.487	122.121	260.06	268.059	258.66	1.05826	3.55411e-07	3.25876e-05	126.304	262.26
PUS3	124.502	123.817	182.687	365.362	254.65	1.05709	6.75111e-06	0.000294848	124.159	267.566
ARL14EP	393.856	271.379	498.628	886.217	691.765	1.05295	5.67925e-06	0.00025985	332.617	692.203
DTX3	247.806	203.534	625.435	372.039	451.151	1.0529	0.000446991	0.00611093	225.67	482.875
CEP76	88.5877	67.8447	156.896	174.572	151.386	1.05195	0.000104267	0.00218778	78.2162	160.951
DYRK2	1977.66	1509.55	2814.46	2433.52	5537.12	1.05033	0.0016089	0.0150873	1743.6	3595.03
ANKRD36C	173.584	98.3749	384.717	162.171	337.862	1.04991	6.30875e-05	0.0015171	135.979	294.917
POLR3D	209.498	120.424	332.061	304.309	381.974	1.04897	6.30993e-06	0.000283477	164.961	339.448
MRPS17	74.2221	72.9331	118.209	196.513	148.378	1.04642	0.000428501	0.00592458	73.5776	154.367
PDCD7	234.638	152.651	340.658	565.691	310.793	1.04565	1.30346e-09	4.00724e-07	193.644	405.714
TRIO	1199.53	686.928	2492.07	1920.3	1411.6	1.04553	0.00142855	0.0139727	943.227	1941.32
KIAA1586	173.584	79.7176	200.956	393.98	209.534	1.0453	3.57426e-06	0.000183796	126.651	268.157
JMY	970.873	686.928	2669.38	1005.46	1810.62	1.04347	4.70323e-07	4.04638e-05	828.901	1828.49
TMPO	2967.69	1823.33	4143.77	6831.21	3893.93	1.04251	4.80368e-09	1.16056e-06	2395.51	4956.31
C1orf131	159.218	189.965	207.404	662.039	329.841	1.04093	2.3138e-05	0.000729941	174.592	399.761
DDX24	3162.82	2505.17	6468.2	4355.72	6932.68	1.03981	1.58493e-11	1.3079e-08	2833.99	5918.87
OTUD4	2711.5	1767.36	4399.53	3871.12	5520.08	1.0375	9.89394e-08	1.25102e-05	2239.43	4596.91
KIF20B	300.48	195.054	495.404	492.237	504.286	1.03738	0.000989914	0.010691	247.767	497.309
RAB23	70.6307	52.5797	132.179	102.072	140.358	1.03384	0.000304629	0.00470106	61.6052	124.87
EXT2	615.325	498.659	1093.97	1063.65	1256.2	1.03288	2.05048e-08	3.80085e-06	556.992	1137.94
DNAJA4	323.225	273.075	593.196	444.539	801.043	1.03235	1.67622e-05	0.000577956	298.15	612.926
CALHM2	100.559	69.5408	99.9406	373.947	131.335	1.0316	0.000691297	0.00836331	85.0499	201.741
BORA	246.609	139.082	371.822	479.835	329.841	1.03142	8.77207e-09	1.88407e-06	192.845	393.833
CASD1	630.888	368.058	1307.82	875.723	841.146	1.03105	2.70076e-09	7.17716e-07	499.473	1008.23
TXK	1350.36	1370.46	2749.98	3297.79	2960.55	1.03086	0.00310013	0.0235157	1360.41	3002.77
ASCC3	1300.08	673.359	2183.65	1635.07	2147.48	1.02584	2.22268e-05	0.000706886	986.722	1988.73
POLR1C	433.361	442.687	694.211	577.138	1431.65	1.02548	0.000653751	0.00805197	438.024	901
PEX14	71.8279	86.502	120.359	186.974	178.455	1.02532	0.000105501	0.00218802	79.1649	161.929
POLR1A	319.634	242.545	538.39	608.618	555.417	1.02357	1.65941e-07	1.83225e-05	281.089	567.475
NAA15	747.01	520.708	1120.84	1174.31	1563.99	1.02353	6.18666e-05	0.00149842	633.859	1286.38
SNORD110	70.6307	44.0991	133.254	90.625	137.35	1.02314	5.74366e-05	0.00142944	57.3649	120.41
TOE1	181.964	286.644	596.42	281.414	590.506	1.01928	3.27937e-06	0.000175563	234.304	489.447
TCAF1	169.993	139.082	364.3	333.881	239.611	1.0178	0.000162385	0.00296051	154.537	312.597
ZNF530	90.982	49.1874	164.418	170.757	81.2071	1.01666	0.00519655	0.0339628	70.0847	138.794
MCPH1	499.204	398.588	1043.47	565.691	1235.15	1.01505	1.06189e-05	0.00041938	448.896	948.102
FDXACB1	79.0106	57.668	184.836	127.829	102.261	1.01275	0.00188411	0.0165961	68.3393	138.309
ITK	3434.57	2060.78	6174.82	4182.1	6024.37	1.01234	0.00322553	0.0241506	2747.68	5460.43
RNF125	2211.1	2461.07	8926.95	2953.42	3853.83	1.01207	0.00174719	0.0160106	2336.08	5244.73
TMEM245	979.253	651.309	1451.82	1880.23	1538.93	1.01105	5.45593e-10	1.98938e-07	815.281	1623.66
ZNF566	144.853	93.2865	283.702	269.967	155.396	1.011	0.000958912	0.0104408	119.07	236.355
SPRYD4	130.487	86.502	293.374	153.585	242.619	1.00961	1.27769e-05	0.00048156	108.495	229.859
SLC41A1	452.515	337.528	1153.08	506.546	843.151	1.00802	1.50202e-07	1.70654e-05	395.022	834.258
TTC28	40.7025	30.5301	84.8958	74.4079	51.1304	1.00782	0.00669715	0.0402162	35.6163	70.1447
HERC2	861.934	461.344	1254.09	1452.86	1149.93	1.0074	2.9894e-05	0.000884354	661.639	1285.63
ZNF16	82.602	27.1379	125.732	112.566	78.1995	1.00731	0.00372069	0.0266865	54.87	105.499
RORA	3217.89	3504.18	8382.11	4022.79	9405.99	1.00629	0.00533602	0.0345004	3361.03	7270.3
ZNF790	43.0967	28.834	75.2241	92.5329	44.1125	1.00465	0.00444114	0.0302225	35.9654	70.6232
UTP20	547.089	240.849	943.525	597.171	807.059	1.00429	8.06169e-05	0.00180829	393.969	782.585
NUFIP1	68.2365	64.4525	135.403	136.414	126.322	1.00332	0.000917334	0.0101626	66.3445	132.713
ZNF121	518.358	262.898	936.003	643.914	763.949	1.00269	2.917e-08	4.97127e-06	390.628	781.288
ZNF816	110.136	91.5904	153.672	363.454	131.335	1.00125	0.00269495	0.0213945	100.863	216.154
C10orf2	113.727	108.552	130.03	347.237	235.601	1.00091	0.00539656	0.03472	111.14	237.623
RNMTL1	55.068	93.2865	138.627	128.783	170.435	0.999629	0.000558266	0.00714039	74.1773	145.948
DDX47	1495.22	993.925	3258.28	1415.66	3247.28	0.999328	1.65234e-06	0.000107054	1244.57	2640.41
CEP70	93.3762	37.3146	175.165	90.625	135.345	0.998102	0.000831551	0.00953062	65.3454	133.712
RCN1	329.211	284.948	400.837	757.434	713.821	0.997881	1.11222e-06	8.07341e-05	307.079	624.031
EXOSC6	233.441	188.269	368.598	348.191	539.376	0.99708	0.000148505	0.00276861	210.855	418.721
PITPNM2	193.935	349.4	1106.87	290.954	498.271	0.99546	0.00418567	0.0289489	271.668	632.031
C9orf40	227.455	227.28	124.657	108.75	109.279	-0.996828	1.16785e-05	0.000453234	227.367	114.229
ACAA1	5718.69	6599.6	3221.74	3067.89	2907.42	-0.997466	2.60477e-06	0.000149052	6159.15	3065.68
MLF2	5296.11	8292.32	5329.09	2247.5	2893.38	-0.998951	5.19764e-05	0.00131654	6794.21	3489.99
AKIRIN2	7183.98	10521	4059.95	3607.83	5404.79	-0.999213	4.36006e-06	0.000214299	8852.5	4357.52
YPEL5	26415.9	66876.2	30174.5	12625.5	26311.1	-0.999304	0.00014356	0.00270214	46646.1	23037
ACTB	170592	284787	114790	113999	101591	-0.99996	1.79633e-06	0.000114027	227690	110127
NRADDP	336.394	396.892	219.224	131.645	218.557	-1.00013	0.00177365	0.0161304	366.643	189.809
LOC101927131	318.437	702.193	297.672	127.829	332.849	-1.00138	0.000454443	0.00617436	510.315	252.783
LOC100288798	114.925	161.131	78.448	45.7895	85.2174	-1.00274	0.00141279	0.0138506	138.028	69.8183
TOR1AIP2	12587.8	13068.6	7912.5	4754.47	7362.78	-1.00285	1.45085e-08	2.80838e-06	12828.2	6676.58
SLC26A11	468.078	388.411	127.881	192.697	324.829	-1.00342	0.00212017	0.018175	428.245	215.136
RNF130	14475.7	19773.3	8926.95	9338.19	6911.63	-1.00403	2.50192e-06	0.000145287	17124.5	8392.26
ZFYVE21	240.623	262.898	118.209	192.697	80.2046	-1.00535	0.00032746	0.00494628	251.761	130.37
ARHGAP9	26467.4	34709.4	15937.8	14545.8	14583.2	-1.00611	4.13552e-05	0.00111502	30588.4	15022.3
TSC22D3	108037	149721	90863.2	51325.2	51785.1	-1.00634	0.000829192	0.00951054	128879	64657.8
DGCR11	489.627	447.775	274.031	150.724	299.765	-1.00988	0.00538419	0.0346797	468.701	241.506
LOC105747689	5092.6	9710.28	3505.44	4014.21	2749.01	-1.0105	0.00011237	0.00229108	7401.44	3422.89
DDIT4	9128.12	7647.8	8823.79	2438.29	2993.64	-1.01051	0.000328902	0.00495851	8387.96	4751.9
NOXRED1	413.01	620.779	267.583	290	183.468	-1.01067	0.00396458	0.0278485	516.895	247.017
ASPRV1	1446.13	2912.23	1071.41	1082.73	859.192	-1.01912	0.000120587	0.0024006	2179.18	1004.44
ITGA5	12747.1	11006.1	4773.51	8278.35	5009.78	-1.01949	0.00030909	0.0047419	11876.6	6020.55
TMEM120A	1262.97	2534	1244.42	784.144	622.588	-1.01964	0.00428764	0.0293819	1898.49	883.718
AMICA1	51057.6	71944.2	24185.6	30162.8	34438.8	-1.02029	0.00219714	0.0185609	61500.9	29595.8
HSDL2	8382.31	14620.5	6956.08	4727.76	4721.04	-1.02047	0.000195819	0.0033888	11501.4	5468.29
LY96	8650.47	13046.5	4269.5	4579.9	6991.83	-1.02113	0.000694981	0.00838591	10848.5	5280.41
RARA-AS1	440.544	785.303	323.464	236.579	315.806	-1.02185	0.00214374	0.0182474	612.923	291.949
ABHD5	11828.9	24907.5	14060.5	7060.16	4809.27	-1.02358	0.00738776	0.0431279	18368.2	8643.3
PDCD4-AS1	1158.82	2549.27	1355.11	542.796	854.179	-1.02486	4.21005e-05	0.00113224	1854.04	917.361
GABARAPL1	14573.9	34745	19007	8298.38	7825.96	-1.02499	0.00389379	0.0274632	24659.4	11710.4
CPEB2	8710.32	11806.7	7773.87	2955.33	5292.5	-1.0279	1.80869e-06	0.000114349	10258.5	5340.57
CBWD6	1229.45	1170.32	546.987	447.401	840.143	-1.0282	0.00177725	0.0161445	1199.89	611.51
ABCA10	198.724	232.368	132.179	88.7171	99.2532	-1.02852	0.000592894	0.00746265	215.546	106.717
PACSIN2	6458.52	12354.5	4820.79	4142.04	4226.78	-1.03082	0.000124045	0.00243722	9406.52	4396.54
NSFL1C	10616.2	14807.1	5863.18	8396.64	4691.97	-1.03171	0.00072828	0.00867682	12711.6	6317.26
LINC01002	1094.18	5375	1188.54	935.822	1497.82	-1.03202	0.00230305	0.0192179	3234.59	1207.39
MARCH2	1043.9	1760.57	471.763	767.927	794.025	-1.03235	0.00310764	0.0235498	1402.23	677.905
RGS14	2777.34	3641.57	1264.84	1786.74	1626.15	-1.03283	0.00182852	0.0163852	3209.45	1559.24
STX6	4674.8	4525.24	2227.71	2607.14	1923.91	-1.03416	8.90288e-09	1.88633e-06	4600.02	2252.92
ZFAS1	17534.4	21795.1	11284.7	7955.92	9534.32	-1.03427	4.83518e-06	0.000233264	19664.7	9591.64
LRMP	19793.4	29872	15739	9436.44	11076.3	-1.03607	1.96034e-05	0.000645717	24832.7	12083.9
RAB40C	107.742	222.191	107.463	64.8684	58.1483	-1.03699	0.00700031	0.041465	164.967	76.8266
ARFIP1	5534.34	4355.63	1711.89	2398.22	3252.3	-1.03701	0.00665735	0.0400079	4944.98	2454.13
TPM1	1880.69	1372.16	588.897	1098.95	752.92	-1.03877	0.00178541	0.0161811	1626.43	813.588
ELF3	235.835	201.838	157.971	64.8684	118.302	-1.03982	0.00386063	0.0273835	218.836	113.714
PTOV1-AS1	2320.04	3738.24	1487.29	1224.87	1689.31	-1.04005	0.00314875	0.0237695	3029.14	1467.15
AGER	2808.47	3653.44	1894.57	1246.81	1590.06	-1.04033	2.32738e-06	0.000139279	3230.95	1577.15
SYCP2	2233.85	3334.57	2170.75	942.5	1063.71	-1.04048	7.64875e-05	0.00173804	2784.21	1392.32
LOC101929095	117.319	196.75	149.374	34.3421	74.1892	-1.04064	3.00731e-05	0.000887978	157.034	85.9683
SCAP	2262.58	3485.52	1791.41	1248.72	1199.06	-1.04201	0.00660525	0.0398322	2874.05	1413.06
UNKL	791.304	1156.75	630.808	371.085	423.079	-1.04329	1.313e-05	0.000489142	974.028	474.991
ARL3	834.4	1073.64	444.897	541.842	394.005	-1.04352	2.60669e-05	0.000796691	954.022	460.248
SLC9A3R1	4088.2	5176.55	2616.72	1648.42	2502.38	-1.04497	0.00038515	0.00553952	4632.38	2255.84
STARD10	934.959	1531.59	557.733	430.23	773.974	-1.04615	0.00420988	0.0290907	1233.28	587.312
MAST3	6679.99	12520.7	6517.63	3833.91	3335.51	-1.04887	0.00190711	0.0167516	9600.37	4562.35
RAB32	3243.03	4018.1	1341.14	1911.71	2018.15	-1.05079	4.84294e-05	0.00125844	3630.57	1757
ULK1	1393.46	2595.06	1449.68	601.941	848.163	-1.05434	0.00210701	0.0181018	1994.26	966.593
CIPC	1600.56	2581.49	1559.29	1009.28	492.256	-1.0552	0.00630902	0.03858	2091.03	1020.27
CRABP2	186.752	240.849	113.911	67.7302	135.345	-1.05531	0.00363829	0.0263121	213.801	105.662
CIB3	199.921	274.771	106.388	79.1776	158.404	-1.05706	0.00806166	0.0454894	237.346	114.657
RHOB	2961.7	1855.55	875.823	1688.49	1003.56	-1.05801	0.000131673	0.00254877	2408.63	1189.29
CYSTM1	2601.37	8607.8	2560.84	1466.22	3036.75	-1.05895	0.00547616	0.0350595	5604.58	2354.6
TSEN34	3011.98	4060.51	2114.87	1278.29	1713.37	-1.05911	0.000316938	0.00483378	3536.24	1702.18
HLA-C	164219	185615	93234.9	90313	66455.5	-1.05992	0.000467593	0.00628226	174917	83334.5
GABARAPL2	4212.7	7016.84	3378.64	2569.93	1887.82	-1.06026	3.03086e-05	0.000893248	5614.77	2612.13
NOMO3	466.881	610.603	315.941	182.204	285.729	-1.06267	0.0062825	0.0384946	538.742	261.291
LOC101929023	132.882	113.64	48.3583	64.8684	67.1713	-1.06287	0.000288537	0.00452878	123.261	60.1327
SIAH1	679.97	1022.76	493.255	284.276	457.166	-1.06394	7.86282e-08	1.04917e-05	851.365	411.566
CDKN2D	8768.98	16525.3	6679.9	3481.91	7848.02	-1.06447	0.000621815	0.0077438	12647.1	6003.27
LOC100289473	385.476	552.935	264.359	232.763	159.407	-1.06522	0.00182709	0.0163852	469.205	218.843
PAPLN	3908.63	5179.94	3561.32	1152.37	2472.31	-1.06869	1.54489e-05	0.000546179	4544.29	2395.33
TMCO3	3378.3	7101.65	3136.84	2480.26	1428.64	-1.06993	0.00144986	0.0140998	5239.98	2348.58
DEF8	6694.36	9683.14	5449.45	3151.84	3022.71	-1.074	0.000744806	0.00880016	8188.75	3874.67
MRPL55	413.01	310.39	240.717	103.026	205.524	-1.07409	1.17957e-05	0.000454492	361.7	183.089
CHIC2	2417.01	3841.71	1416.36	1450	1468.75	-1.07595	1.0729e-16	5.60731e-13	3129.36	1445.04
LOC101926933	117.319	240.849	79.5226	84.9013	69.1765	-1.07606	0.00233576	0.0193872	179.084	77.8668
M1AP	573.426	403.676	245.016	281.414	174.445	-1.08186	0.000379892	0.00548425	488.551	233.625
AOC2	1203.12	1450.18	877.973	470.296	552.409	-1.08304	0.00740681	0.0431644	1326.65	633.559
KLF16	1312.06	1774.14	925.256	527.533	733.872	-1.08382	0.000405718	0.00571028	1543.1	728.887
MARK4	464.487	1986.15	552.36	486.513	492.256	-1.08426	0.00140384	0.013807	1225.32	510.376
LRCH4	4006.8	6414.72	3313.08	1574.01	2494.36	-1.08488	0.00269762	0.0214049	5210.76	2460.49
LGMN	594.974	541.062	320.24	148.816	402.025	-1.0863	0.000365733	0.00534873	568.018	290.36
CAMK1D	5913.83	10890.8	4808.97	4340.46	2729.96	-1.08867	0.00422534	0.0291205	8402.3	3959.8
CCPG1	3026.35	3171.74	1525.97	1671.32	1187.03	-1.08907	0.000682256	0.00831597	3099.04	1461.44
CNN2	19854.4	33101.4	12753.7	9271.41	14368.7	-1.08967	6.94406e-05	0.00162259	26477.9	12131.3
KCNQ1OT1	565.046	586.857	348.18	247.072	211.54	-1.0903	1.08433e-05	0.000426094	575.951	268.931
REM2	3239.44	4508.28	2458.75	1102.76	2134.44	-1.09111	3.91015e-05	0.00106993	3873.86	1898.65
UNC119	4251.01	5325.81	2292.19	1372.73	3177.1	-1.09218	1.04668e-05	0.000415467	4788.41	2280.67
REPS2	12832	20216	11154.7	6432.46	5115.05	-1.09332	0.00319245	0.0240184	16524	7567.39
LINC00173	1942.94	2941.07	992.958	1291.64	954.435	-1.0948	0.00575532	0.0360957	2442.01	1079.68
DHRS7	6337.61	10767	4491.95	3917.86	3073.84	-1.09499	1.03069e-05	0.000412249	8552.28	3827.88
OAZ2	14481.7	21700.1	7697.57	8644.67	8577.88	-1.09818	1.60403e-05	0.000557639	18090.9	8306.71
ADAM8	6075.44	11269	4640.25	1927.93	5733.62	-1.09824	0.00243329	0.0199537	8672.22	4100.6
NLGN3	921.791	1094	499.703	392.072	524.337	-1.09887	1.63604e-05	0.000567509	1007.89	472.038
MKLN1-AS	120.91	186.573	87.045	60.0987	66.1688	-1.10001	0.00187514	0.0165488	153.742	71.1042
PARD6G	177.175	195.054	151.523	65.8223	56.1432	-1.10072	0.00191972	0.0168251	186.114	91.1628
WNT4	50.2795	47.4913	25.7911	23.8487	19.0486	-1.1012	0.00183603	0.0163852	48.8854	22.8961
DLGAP1-AS1	684.759	912.512	434.15	366.316	317.811	-1.10134	0.000453579	0.00617436	798.635	372.759
PHC2	31385.2	51360.2	29255.7	16756.1	10317.3	-1.10347	0.00711186	0.0419446	41372.7	18776.4
TPTEP1	836.795	856.54	307.344	409.243	470.199	-1.10416	0.00529072	0.0343634	846.667	395.596
SNORD12	610.537	819.225	528.718	200.329	340.869	-1.10562	0.00255767	0.020565	714.881	356.639
FRAT1	2692.35	3865.45	1031.64	3034.51	1036.64	-1.10623	0.00309615	0.0234969	3278.9	1700.93
RNU6-78P	849.963	1243.25	689.912	435	314.803	-1.10654	0.000406337	0.00571387	1046.61	479.905
CEBPA	1470.08	1280.57	468.539	1087.5	512.307	-1.10841	0.000780782	0.00908151	1375.32	689.448
LINC-PINT	3429.78	9686.53	6108.2	831.842	3818.74	-1.10868	4.96326e-06	0.000237227	6558.16	3586.26
ROPN1L	652.436	1202.55	424.479	369.177	429.095	-1.10964	0.00749193	0.0434403	927.492	407.584
MST1	93.3762	98.3749	31.1643	45.7895	57.1458	-1.10983	0.00778063	0.0445391	95.8755	44.6998
UBE2B	17354.8	27716.3	11991.8	8645.62	9819.05	-1.11259	2.94938e-07	2.89021e-05	22535.5	10152.2
TPD52L2	10959.7	19990.4	7749.16	5987.92	6923.66	-1.11322	4.90642e-06	0.000235975	15475.1	6886.91
ATG16L2	20405.1	30284.2	15366.1	8669.47	10919.9	-1.11411	0.00107677	0.0113918	25344.6	11651.8
C1orf122	172.387	208.623	92.4182	74.4079	96.2455	-1.11428	2.52655e-05	0.00077674	190.505	87.6905
GPN3	743.418	491.874	225.672	500.822	196.501	-1.1163	0.000294484	0.00458512	617.646	307.665
CCNG2	13981.3	23840.6	12259.4	6598.45	6942.71	-1.1166	9.77174e-05	0.00207723	18911	8600.18
NLRP1	38754.7	54492.9	30120.8	15283.2	19886.7	-1.1197	6.52146e-06	0.000290483	46623.8	21763.6
MIR628	181.964	276.467	145.075	74.4079	101.258	-1.12024	0.000121053	0.00240556	229.216	106.914
LOC148696	263.369	714.066	400.837	107.796	209.534	-1.12033	0.00332144	0.0246226	488.717	239.389
MBOAT7	8492.45	13640.2	5984.61	4002.76	4929.57	-1.12102	0.000518947	0.00677483	11066.3	4972.32
MIR616	940.945	910.815	779.107	249.934	493.258	-1.12341	0.000784647	0.0091197	925.88	507.433
PLIN4	1863.93	4462.49	1868.78	943.454	1265.23	-1.12346	0.00386382	0.0273835	3163.21	1359.15
DEDD2	3498.02	6738.68	2644.66	1346.97	3000.65	-1.12659	2.41449e-05	0.000755625	5118.35	2330.76
VENTX	642.859	464.736	221.374	284.276	226.578	-1.12753	0.00616412	0.0380052	553.798	244.076
CXCL16	5894.67	11201.2	6731.48	2154.97	3329.49	-1.1277	0.00082836	0.00951054	8547.92	4071.98
GSTO2	77.8135	79.7176	24.7165	22.8947	62.1585	-1.13324	0.00380038	0.0270355	78.7655	36.5899
ADGRE3	7155.25	15680.6	7216.14	4156.35	3419.72	-1.13417	0.00886696	0.0488493	11417.9	4930.74
TMEM55A	7187.57	7644.4	3358.22	3751.87	3019.7	-1.13509	9.76825e-06	0.000396778	7415.99	3376.6
TMCC1	4660.43	4835.63	3277.62	1678.95	1639.18	-1.14051	0.00103626	0.0110611	4748.03	2198.58
LINC00869	498.006	546.15	286.926	170.757	270.69	-1.14077	5.85001e-12	7.35161e-09	522.078	242.791
SNORD12C	202.315	323.959	168.717	69.6381	132.338	-1.14117	0.000992793	0.010708	263.137	123.564
NHLH1	128.093	84.8059	40.8359	46.7434	68.1739	-1.1423	0.00530171	0.0343664	106.449	51.9177
PDLIM7	3670.4	5955.07	2355.59	1648.42	2396.11	-1.14311	0.00148623	0.0142698	4812.74	2133.37
SCLT1	4926.19	6491.04	2550.1	1749.54	3531.01	-1.14332	1.61306e-07	1.7937e-05	5708.62	2610.21
SPTB	1607.75	3056.4	1059.59	854.736	1269.24	-1.14421	0.00670041	0.0402193	2332.08	1061.19
NR6A1	1161.22	2255.84	867.226	600.987	743.897	-1.14526	0.000805491	0.00930277	1708.53	737.37
PINK1	486.035	909.119	377.195	313.849	210.537	-1.14612	0.000936273	0.0102707	697.577	300.527
EFCAB12	286.114	351.096	194.508	115.428	131.335	-1.14681	4.95252e-05	0.00127715	318.605	147.09
CKLF	389.068	351.096	171.941	197.467	144.368	-1.14991	0.00186076	0.0165109	370.082	171.259
TUBA4A	26036.4	31915.9	23178.7	10951.3	6093.54	-1.15045	0.0074467	0.0432421	28976.1	13407.8
VAMP2	14837.2	16543.9	11160	4503.58	6903.61	-1.15062	3.78027e-15	9.87847e-12	15690.6	7522.41
CC2D2B	440.544	461.344	178.389	284.276	150.384	-1.15074	0.00259436	0.0207642	450.944	204.349
LPPR2	3656.04	5171.46	2335.17	2190.26	1320.37	-1.15236	0.000433312	0.00596045	4413.75	1948.6
MIR22HG	9732.67	19998.9	12638.7	2663.42	7035.95	-1.15311	0.000158218	0.00290644	14865.8	7446.03
C1orf204	185.555	103.463	89.1943	41.9737	74.1892	-1.15384	0.00793305	0.0451478	144.509	68.4524
DTD1	776.938	1336.54	725.375	310.987	440.123	-1.15387	0.0021879	0.0185327	1056.74	492.161
FCGRT	5021.96	7900.52	3510.82	2566.12	2403.13	-1.15466	0.00134749	0.0134056	6461.24	2826.69
RNF175	5335.61	8253.31	3833.2	2990.62	1946.97	-1.15624	0.000875987	0.00990238	6794.46	2923.6
DGAT2	11174	25150	9827.49	6785.42	5658.43	-1.15759	0.00287737	0.0223229	18162	7423.78
TAGLN2	40226	76077.7	27887.7	18519	31895.4	-1.15973	0.00554523	0.035343	58151.8	26100.7
LOC645166	95.7705	169.612	85.9704	31.4802	62.1585	-1.16125	3.94851e-05	0.00107667	132.691	59.8697
LPAR2	5604.97	7362.85	4705.8	1414.7	3398.67	-1.16127	0.000813215	0.0093684	6483.91	3173.06
EXT1	1710.7	4241.99	1429.26	901.48	1364.48	-1.16166	1.0269e-07	1.28098e-05	2976.35	1231.74
FAM114A1	130.487	346.008	75.2241	145.954	91.2327	-1.16172	0.0027918	0.0219149	238.248	104.137
RALBP1	5862.35	13144.9	4435	4880.39	2753.02	-1.16219	0.0025792	0.0206744	9503.63	4022.8
VMP1	39528.1	64835.8	30639.8	24796.9	12182.1	-1.1626	0.00284255	0.0221183	52181.9	22539.6
ABCA7	5423	6998.18	2549.02	1465.26	4487.45	-1.16714	0.00492725	0.0326381	6210.59	2833.91
CTDP1	567.44	1541.77	505.076	382.533	418.066	-1.16733	2.47269e-07	2.53394e-05	1054.61	435.225
KIAA1257	335.197	602.122	269.732	186.02	144.368	-1.16773	0.00257577	0.0206681	468.659	200.04
PPM1F	4670.01	6986.31	2617.8	2629.08	2324.93	-1.1678	0.000854006	0.00970287	5828.16	2523.94
LINC01191	93.3762	100.071	29.015	27.6645	77.1969	-1.16843	0.00633538	0.0386808	96.7236	44.6255
PIGX	2650.45	3533.01	1556.06	1453.82	1065.72	-1.16899	0.00190831	0.0167528	3091.73	1358.53
ERF	780.529	1901.35	999.406	302.401	505.289	-1.16949	0.000324713	0.00490952	1340.94	602.365
CATSPER1	259.777	356.185	76.2987	262.335	126.322	-1.17484	3.16808e-05	0.000918322	307.981	154.985
ORM2	514.766	990.533	509.375	284.276	192.491	-1.17591	0.00201369	0.0174917	752.65	328.714
ZNF746	2716.29	3626.3	1768.84	1351.74	1015.59	-1.17816	4.85509e-05	0.00125844	3171.3	1378.72
TUBB4B	1647.25	4888.21	1635.59	804.177	1669.26	-1.17819	0.000215808	0.00363833	3267.73	1369.67
ATP6V0C	890.665	1640.15	620.061	475.066	530.353	-1.18028	1.75039e-07	1.91919e-05	1265.41	541.827
IRAIN	129.29	320.566	220.299	32.4342	91.2327	-1.18462	0.00285086	0.022161	224.928	114.655
CUEDC1	480.05	1005.8	237.493	351.052	366.936	-1.18758	0.00223024	0.0187225	742.924	318.494
ANKRD44-IT1	536.315	374.842	320.24	115.428	229.586	-1.18839	0.000100809	0.00213018	455.578	221.751
FOXO3	23084.3	37694.5	22380.2	7881.51	11841.2	-1.18934	1.56153e-05	0.000547722	30389.4	14034.3
CBX4	1847.17	3085.24	1780.66	576.184	1115.85	-1.19194	1.9649e-09	5.70513e-07	2466.21	1157.56
ACE2	50.2795	113.64	35.4628	27.6645	35.0895	-1.19422	0.00623851	0.0382982	81.9597	32.7389
C5orf66	4916.62	5295.28	3689.2	1568.29	1817.64	-1.1954	1.40869e-06	9.60299e-05	5105.95	2358.38
NPL	16309.7	24597.1	8748.56	9660.62	7549.26	-1.19906	0.000434797	0.00597117	20453.4	8652.81
HSPA1A	1738.23	2522.13	1064.96	780.329	801.043	-1.20018	0.00305332	0.0232539	2130.18	882.11
VIPR1	2060.26	1443.4	1122.99	784.144	347.887	-1.20413	0.000902217	0.0100682	1751.83	751.673
ST3GAL3	235.835	317.174	153.672	79.1776	149.381	-1.20431	0.00105769	0.0112431	276.504	127.41
DCST2	203.512	198.446	87.045	77.2697	99.2532	-1.20568	6.73455e-06	0.000294848	200.979	87.856
COL7A1	125.699	252.722	126.806	40.0658	89.2276	-1.20758	0.00628277	0.0384946	189.21	85.3666
TREM1	37676.1	98235.8	30471.1	20441.2	31281.8	-1.20808	0.00119249	0.0122926	67955.9	27398
C10orf128	4149.26	2540.79	2387.83	1256.35	753.923	-1.2081	0.00514687	0.0337224	3345.02	1466.03
SRXN1	5773.76	10225.9	3526.94	3554.41	2911.43	-1.20908	0.000179143	0.00317427	7999.83	3330.92
GIF	90.982	78.0214	41.9106	15.2632	65.1662	-1.21058	0.00700932	0.0415027	84.5017	40.78
CXCL5	517.161	474.913	277.255	163.125	226.578	-1.21113	0.00203362	0.0175967	496.037	222.319
TUFT1	1737.04	1957.32	639.405	476.973	1368.49	-1.21197	0.00127591	0.0129399	1847.18	828.29
DDIT3	11627.7	12408.8	8713.1	2890.46	6441.43	-1.21664	8.48962e-05	0.00188273	12018.3	6015
C10orf131	195.132	291.732	136.478	86.8092	85.2174	-1.22205	0.0032436	0.0242058	243.432	102.835
C3orf62	6651.26	9930.77	4369.44	3002.07	3210.19	-1.22351	7.40299e-05	0.00169944	8291.02	3527.23
CASP2	4375.51	13172.1	3505.44	4101.02	3022.71	-1.22524	2.6842e-05	0.000815611	8773.78	3543.06
PRDX5	1826.82	3938.39	1153.08	1039.8	1301.32	-1.22978	5.46957e-06	0.00025372	2882.6	1164.73
SERTAD3	3373.51	1845.38	1488.36	871.908	1098.8	-1.2319	3.63699e-05	0.00102011	2609.45	1153.02
PSRC1	659.619	262.898	214.926	255.658	94.2404	-1.23295	0.00475467	0.0318311	461.259	188.275
SMAP2	190443	311114	177849	100704	38376.9	-1.23463	0.00831722	0.0466068	250779	105643
TREML3P	1243.82	1947.14	816.719	456.941	803.048	-1.23589	0.0064407	0.0390955	1595.48	692.236
NECAP1	13090.6	18513.1	9284.8	4034.24	7692.62	-1.23742	2.50804e-13	4.70724e-10	15801.9	7003.89
ATP6V0B	16206.8	28903.6	12743	6044.21	9908.27	-1.23786	2.16739e-08	3.90603e-06	22555.2	9565.15
MIR142	438.15	473.217	247.165	104.934	248.634	-1.23971	0.000495328	0.00652626	455.683	200.244
LSMEM1	2023.15	1670.68	1128.36	551.381	843.151	-1.24114	0.000266646	0.00425305	1846.91	840.964
LOC101929567	191.541	256.114	166.568	75.3618	47.1202	-1.24839	0.00855734	0.047494	223.827	96.3499
C20orf197	1441.35	1972.59	642.629	1160	461.176	-1.2515	0.00029409	0.00458354	1706.97	754.601
CYP17A1	80.2078	133.993	62.3285	36.25	36.0921	-1.25295	5.56715e-05	0.0013966	107.101	44.8902
LINC00243	1138.47	1565.52	715.703	635.329	304.777	-1.25304	0.00462474	0.031205	1351.99	551.937
ERV3-1	5970.09	6679.31	4227.59	1883.09	2206.63	-1.25438	8.53667e-05	0.00188782	6324.7	2772.44
DPYD-AS2	116.122	196.75	78.448	47.6973	67.1713	-1.2557	0.00379127	0.0270197	156.436	64.4389
ASF1B	381.885	451.167	192.359	248.98	95.2429	-1.25575	0.00465696	0.0313375	416.526	178.861
SNAI3	190.344	139.082	73.0748	70.5921	62.1585	-1.26022	2.44492e-05	0.000763623	164.713	68.6085
SV2C	168.795	64.4525	38.6867	59.1447	43.11	-1.2604	0.00382513	0.0271869	116.624	46.9804
LHX4-AS1	1136.08	2790.11	916.659	777.467	535.366	-1.26126	0.000405328	0.00570992	1963.1	743.164
LOC643339	52.6738	111.944	42.9852	32.4342	21.0537	-1.26258	0.00504311	0.0331812	82.3088	32.1577
CFAP58	780.529	988.837	326.687	292.862	491.253	-1.2627	0.000558334	0.00714039	884.683	370.267
COL9A3	209.498	705.585	137.553	108.75	244.624	-1.27083	0.00251941	0.0203437	457.542	163.642
MAP7D1	5850.38	9667.87	2541.5	2595.69	4272.9	-1.27293	2.78244e-06	0.00015462	7759.13	3136.7
TIMP1	3990.04	9418.54	1949.38	3476.18	3132.99	-1.2734	0.00052095	0.00679532	6704.29	2852.85
SNORD1A	55.068	149.258	67.7017	22.8947	33.0844	-1.27769	0.00594509	0.0369998	102.163	41.2269
LINC01160	129.29	174.7	59.1046	56.2829	70.179	-1.27897	4.00814e-07	3.57066e-05	151.995	61.8555
PBXIP1	12426.2	20760.5	8548.68	5257.2	7663.55	-1.2797	0.000687934	0.00834838	16593.4	7156.48
IFT81	185.555	201.838	78.448	84.9013	74.1892	-1.28149	1.52601e-05	0.000545503	193.697	79.1795
GNMT	343.577	340.92	180.538	103.026	143.366	-1.28985	3.89255e-05	0.00106849	342.248	142.31
ATP7B	225.061	393.499	61.2539	189.835	144.368	-1.29089	0.00251084	0.0203239	309.28	131.819
FAM209B	407.025	400.284	222.448	102.072	206.527	-1.29161	3.99137e-08	6.38579e-06	403.654	177.016
FBXO40	470.472	390.107	141.851	210.822	174.445	-1.29511	3.06104e-05	0.000897085	430.29	175.706
RCN3	800.881	1102.48	587.823	227.993	379.969	-1.29738	0.00441334	0.0300725	951.679	398.595
WDR66	207.104	189.965	104.239	84.9013	58.1483	-1.30424	0.00574107	0.0360666	198.534	82.4296
MTURN	7264.19	9443.99	4684.31	2338.12	3642.29	-1.30538	0.000279611	0.00442757	8354.09	3554.91
CERS4	950.522	1236.47	506.151	500.822	324.829	-1.30572	1.21282e-05	0.00046267	1093.5	443.934
LOC100268168	274.143	607.21	346.031	97.3026	131.335	-1.30598	0.000479734	0.00639604	440.677	191.556
EXTL3	5807.28	8806.25	4462.94	2574.7	1721.39	-1.30602	0.00160921	0.0150873	7306.76	2919.68
ITGAD	401.039	639.437	301.971	124.013	219.56	-1.30645	0.00184246	0.016409	520.238	215.181
MYB	587.791	213.711	116.06	223.224	139.355	-1.3077	0.0055041	0.0351809	400.751	159.546
MYH11	1817.24	2824.04	906.988	613.388	1294.3	-1.30951	1.1435e-05	0.000445993	2320.64	938.226
SULT1A1	3253.8	6828.57	1595.83	1929.83	2708.91	-1.31282	0.00272618	0.0215443	5041.19	2078.19
DPEP2	19419.9	22019	11099.9	8700.95	5134.1	-1.31373	0.00028181	0.00443624	20719.4	8311.63
KCNK7	265.763	410.461	193.433	34.3421	261.667	-1.31377	0.00672523	0.0402647	338.112	163.148
HEXIM2	693.139	671.663	241.792	356.776	233.596	-1.31621	2.70203e-13	4.70724e-10	682.401	277.388
SLC45A4	3095.78	7244.12	2572.66	1651.28	1694.32	-1.31797	0.00152019	0.0144682	5169.95	1972.76
FGGY	606.945	688.624	333.135	179.342	294.752	-1.31885	9.7585e-05	0.00207723	647.785	269.076
VIM-AS1	3521.96	6716.63	1596.9	2335.26	2023.16	-1.32209	7.03516e-08	1.01197e-05	5119.29	1985.11
FCGR2B	2097.37	1752.09	1202.51	392.072	922.353	-1.32315	0.000187516	0.00328499	1924.73	838.979
ABTB1	10002	21550.9	9133.28	5065.46	3850.82	-1.32622	0.00422263	0.0291205	15776.5	6016.52
EPOR	986.436	593.641	402.986	334.835	193.494	-1.32818	7.55815e-05	0.00172495	790.039	310.438
SNORD12B	820.035	1127.92	566.33	249.934	409.043	-1.33152	0.000191662	0.00333896	973.977	408.436
KIF3C	448.924	1116.05	272.956	264.243	342.875	-1.33173	0.00023958	0.00392106	782.485	293.358
ING2	1061.86	1275.48	688.838	266.151	534.363	-1.33944	3.91701e-08	6.38579e-06	1168.67	496.451
LY6G5C	249.003	283.252	93.4928	110.658	112.286	-1.34066	0.00151013	0.014411	266.127	105.479
LOC101928988	282.523	386.715	231.045	97.3026	81.2071	-1.34263	0.0054571	0.0349803	334.619	136.518
C1orf56	140.064	123.817	56.9554	45.7895	55.1406	-1.34469	2.98617e-05	0.000884354	131.94	52.6285
CEP295NL	189.147	269.683	108.538	66.7763	95.2429	-1.3482	0.000202654	0.00347338	229.415	90.1856
DOCK4-AS1	58.6594	94.9826	16.1194	14.3092	60.1534	-1.35255	0.00844769	0.0470367	76.821	30.194
FAM53C	27232.3	22532.9	11098.8	8740.06	10271.2	-1.35681	2.80273e-05	0.000844439	24882.6	10036.7
RPS6KA5	1790.91	2645.94	1364.78	639.144	675.724	-1.35728	0.00135262	0.0134396	2218.43	893.216
MGLL	689.547	798.872	128.956	330.066	421.074	-1.359	0.00176151	0.0160761	744.21	293.365
TMC3	161.613	139.082	121.433	18.125	88.225	-1.36321	1.26585e-05	0.000478249	150.347	75.9277
TRPC2	47.8852	40.7068	6.44778	38.1579	17.0435	-1.36388	0.00323312	0.0241506	44.296	20.5497
CECR6	1096.57	1367.07	350.329	813.717	370.946	-1.36541	0.00407505	0.0283842	1231.82	511.664
MIR373	132.882	117.032	41.9106	66.7763	39.0997	-1.36764	0.000452497	0.00617436	124.957	49.2622
GPR55	186.752	576.68	101.015	186.02	182.465	-1.37035	0.0076932	0.0442486	381.716	156.5
FTH1	164991	286593	106097	56516.6	97766.4	-1.3705	1.11072e-07	1.33962e-05	225792	86793.4
FAM174A	405.827	586.857	203.105	233.717	143.366	-1.37176	0.00146646	0.0141641	496.342	193.396
CADM4	319.634	364.665	133.254	65.8223	215.55	-1.37979	0.000161443	0.00294676	342.15	138.209
ARAP3	9398.67	11915.2	5469.87	3182.37	3655.32	-1.38215	1.73856e-05	0.000590019	10657	4102.52
YPEL3	4571.84	6596.2	2924.07	1840.16	1577.02	-1.38297	2.2144e-05	0.000706886	5584.02	2113.75
PITPNM3	64.6451	47.4913	22.5672	30.5263	12.0307	-1.38426	0.0022092	0.0186226	56.0682	21.7081
ISOC1	299.283	712.37	167.642	221.316	189.483	-1.38645	0.0016966	0.0156938	505.826	192.814
EFHC2	496.809	971.876	270.807	276.645	233.596	-1.38744	0.00271464	0.0214747	734.343	260.349
MEGF6	3311.26	3353.23	2243.83	939.638	814.076	-1.39403	1.736e-05	0.000590019	3332.24	1332.51
MARCKSL1	1055.87	1363.68	348.18	383.487	639.632	-1.39541	0.00414381	0.0287354	1209.77	457.099
CFD	161.613	468.129	195.583	81.0855	58.1483	-1.39855	0.00599774	0.0372135	314.871	111.605
LINC01270	1448.53	1713.08	678.091	664.901	420.071	-1.40042	0.00121858	0.0124795	1580.8	587.688
OMG	1241.42	1601.14	708.181	373.947	573.463	-1.40263	9.84558e-08	1.25102e-05	1421.28	551.864
LINC01590	350.759	239.153	168.717	119.243	49.1253	-1.41287	0.00424251	0.0291875	294.956	112.362
HIST1H1C	2500.81	1112.65	1154.15	484.605	573.463	-1.41426	0.00842577	0.046985	1806.73	737.407
C6orf163	292.1	327.351	205.254	96.3486	59.1509	-1.4194	0.00101304	0.0108865	309.725	120.251
PRMT5	1782.53	3821.35	1331.47	712.598	935.386	-1.42082	6.0707e-08	8.89556e-06	2801.94	993.15
LINC00622	64.6451	79.7176	53.7315	13.3553	20.0511	-1.42339	0.00563919	0.035652	72.1813	29.046
C9orf89	1473.67	1730.04	916.659	253.75	890.271	-1.42497	5.75416e-06	0.000262266	1601.85	686.893
SLC22A1	1496.41	1017.67	603.942	367.27	597.524	-1.43054	0.000563867	0.00719355	1257.04	522.912
LOC100505658	86.1934	230.672	58.03	27.6645	82.2097	-1.43261	7.49918e-05	0.00171649	158.433	55.9681
LYRM9	372.308	237.457	125.732	116.382	91.2327	-1.4334	1.1097e-06	8.07341e-05	304.882	111.115
SDC4	933.762	875.197	481.434	356.776	170.435	-1.4351	0.001446	0.0140819	904.48	336.215
AFAP1	405.827	695.408	97.7913	133.553	379.969	-1.43878	0.00284956	0.022161	550.618	203.771
LINC01271	462.093	702.193	235.344	231.809	153.391	-1.44502	7.12561e-05	0.0016467	582.143	206.848
PRDM8	906.228	873.501	265.434	270.921	441.125	-1.45129	7.65306e-06	0.000326413	889.864	325.827
SEMA3C	1069.04	1277.18	290.15	842.335	325.831	-1.45194	0.000250204	0.00406523	1173.11	486.105
PER1	12678.8	31803.9	18539.5	3286.35	7286.59	-1.45295	0.000400546	0.00567238	22241.4	9704.15
MYLK3	143.656	125.513	40.8359	67.7302	41.1048	-1.46517	6.22884e-05	0.00150481	134.584	49.8903
TSPAN16	4628.11	6921.86	2219.11	2021.41	1857.74	-1.46773	4.14766e-06	0.000205795	5774.98	2032.75
TTC26	640.465	2227	445.971	501.776	423.079	-1.46801	0.000759643	0.00892837	1433.73	456.942
IL1RAP	9184.39	22878.9	7860.92	4724.9	4231.79	-1.46852	0.000898591	0.010056	16031.7	5605.87
MIR4298	20.3512	27.1379	13.9702	1.90789	12.0307	-1.46861	0.00641971	0.0390127	23.7446	9.30292
DLGAP1-AS2	440.544	320.566	226.747	111.612	84.2148	-1.46912	0.000893311	0.0100188	380.555	140.858
CD151	438.15	1345.02	122.508	462.664	445.135	-1.47248	0.00569375	0.0358523	891.586	343.436
SYP	164.007	310.39	39.7613	88.7171	123.315	-1.47281	0.000240038	0.00392445	237.198	83.931
HRAT92	58.6594	84.8059	17.1941	33.3881	27.069	-1.47559	0.00176777	0.0160957	71.7327	25.8838
HIST1H3A	28.7311	20.3534	18.2687	3.81579	10.0256	-1.48237	0.00771587	0.0443132	24.5423	10.7034
C16orf45	590.186	444.383	106.388	204.145	239.611	-1.48379	2.16771e-05	0.000696768	517.284	183.381
GPR143	50.2795	54.2758	35.4628	8.58552	24.0614	-1.48387	0.00177467	0.0161304	52.2776	22.7032
LY6G6C	241.82	149.258	91.3435	55.3289	105.269	-1.48495	0.00336723	0.0248563	195.539	83.9803
MTRNR2L2	190.344	378.234	170.866	123.059	43.11	-1.48539	0.0085444	0.0474726	284.289	112.345
MAK	4334.81	6682.71	1657.08	1264.93	2972.58	-1.48779	8.03999e-05	0.001806	5508.76	1964.87
PPDPF	81.4049	125.513	25.7911	23.8487	60.1534	-1.48935	0.00620317	0.0382009	103.459	36.5977
ZNF117	19952.6	18058.6	10799	5134.14	5335.61	-1.49043	1.78902e-06	0.000114025	19005.6	7089.57
LINC00936	549.483	907.423	336.359	174.572	263.673	-1.49433	2.22183e-05	0.000706886	728.453	258.201
RAB3A	159.218	103.463	102.09	19.0789	53.1355	-1.50229	0.00135984	0.0135028	131.341	58.1014
MFSD6L	47.8852	93.2865	24.7165	20.9868	26.0665	-1.50698	0.000514037	0.00671632	70.5859	23.9233
LOC101927817	52.6738	142.474	69.8509	4.76973	59.1509	-1.52247	0.000502998	0.00660541	97.5738	44.5905
CPLX3	35.9139	54.2758	30.0896	6.67763	15.0384	-1.52789	0.00118553	0.0122525	45.0949	17.2685
CYP4F12	380.688	332.439	173.015	53.421	182.465	-1.53279	0.00128105	0.0129584	356.563	136.301
NRGN	1489.23	2908.84	393.315	832.796	1084.77	-1.53535	0.00620951	0.0382161	2199.04	770.292
HIST1H2AG	39.5053	78.0214	17.1941	17.171	25.0639	-1.53975	0.00124471	0.0126891	58.7634	19.8097
COL11A2	84.9963	83.1098	42.9852	18.125	29.0742	-1.54282	1.5708e-05	0.000549744	84.053	30.0614
C1orf100	55.068	54.2758	11.8209	16.2171	28.0716	-1.54337	0.000177169	0.0031563	54.6719	18.7032
CDH13	100.559	27.1379	27.9404	20.9868	14.0358	-1.54417	0.00720055	0.0423435	63.8484	20.9877
PARD6A	23.9426	32.2262	8.59704	10.4934	10.0256	-1.5465	0.0053918	0.0347036	28.0844	9.70534
BTNL8	3221.48	5239.31	1296	1590.23	1292.3	-1.56393	0.00192588	0.0168692	4230.39	1392.84
PAQR6	1253.4	1860.64	606.091	517.039	417.064	-1.56566	5.98268e-06	0.000271105	1557.02	513.398
LOC102723854	254.989	220.495	104.239	108.75	29.0742	-1.5743	0.00269191	0.021392	237.742	80.6877
KIFC3	76.6164	288.34	56.9554	49.6052	82.2097	-1.58129	0.00258976	0.020738	182.478	62.9234
LOC100507006	17369.2	22777.2	7978.05	6936.15	5275.46	-1.58441	3.05656e-05	0.000897085	20073.2	6729.89
MYBPHL	27.534	61.0603	36.5374	4.76973	17.0435	-1.58666	0.00560715	0.035496	44.2971	19.4502
FSTL1	454.91	607.21	124.657	173.618	197.504	-1.5875	0.00464785	0.0313107	531.06	165.26
CASC1	77.8135	59.3641	37.612	13.3553	24.0614	-1.58862	0.000191051	0.00333203	68.5888	25.0096
DOCK6	69.4336	106.855	23.6419	23.8487	38.0972	-1.59262	0.000305475	0.00470486	88.1445	28.5292
CCNJL	4318.05	7420.52	2609.2	1631.25	1403.58	-1.59806	2.58594e-06	0.000149052	5869.28	1881.34
FAM71F2	1975.27	2764.67	1075.7	398.75	1043.66	-1.60121	1.09185e-09	3.49369e-07	2369.97	839.372
CHRNE	64.6451	79.7176	41.9106	12.4013	22.0563	-1.60793	0.000707187	0.00849011	72.1813	25.456
RELL1	4707.12	8614.58	3477.5	2118.72	1255.2	-1.60836	0.000734902	0.00871598	6660.85	2283.81
LTBP2	300.48	702.193	180.538	145.954	141.361	-1.60973	5.63247e-06	0.000259169	501.336	155.951
VSIG8	180.767	132.297	53.7315	41.0197	59.1509	-1.6139	5.81248e-05	0.00144236	156.532	51.3007
RNASET2	11135.7	21364.3	5982.46	3599.24	5918.1	-1.6177	1.12495e-09	3.52761e-07	16250	5166.6
CFAP54	323.225	373.146	166.568	79.1776	108.276	-1.61916	2.90162e-05	0.000864913	348.186	118.007
ALDH1A2	81.4049	127.209	46.2091	20.0329	38.0972	-1.61922	0.00412384	0.0286344	104.307	34.7797
TREML4	2572.63	4048.63	1867.71	628.651	885.258	-1.62607	0.000641327	0.00794591	3310.63	1127.21
ISL2	74.2221	45.7952	18.2687	23.8487	17.0435	-1.62858	0.00239963	0.0197916	60.0087	19.7203
KIAA0319	1337.2	3741.64	1026.27	451.217	787.007	-1.62862	5.13128e-05	0.00130315	2539.42	754.832
LOC102467147	156.824	546.15	78.448	99.2105	121.309	-1.62996	7.92525e-07	6.23168e-05	351.487	99.656
RNF122	2663.62	3268.42	1732.3	693.519	596.522	-1.63032	3.32787e-05	0.000945247	2966.02	1007.45
LOC101927066	195.132	330.743	157.971	27.6645	107.274	-1.63087	3.51161e-06	0.000182313	262.938	97.6362
DNAH14	244.215	132.297	70.9256	66.7763	47.1202	-1.63323	2.18847e-05	0.000701698	188.256	61.6073
NSUN7	2984.45	9545.75	1723.71	2383.91	900.296	-1.63616	0.000323507	0.00490073	6265.1	1669.31
TAS1R1	71.8279	67.8447	44.0598	9.53947	30.0767	-1.63725	0.0012846	0.0129776	69.8363	27.892
ADD3-AS1	98.1647	100.071	36.5374	43.8816	15.0384	-1.63909	0.00124603	0.0126942	99.1179	31.8191
PDZD3	167.598	369.754	121.433	62.0066	65.1662	-1.64075	0.00110811	0.0116604	268.676	82.8686
LOC728392	1868.72	2154.07	924.182	383.487	725.851	-1.64165	2.10736e-08	3.84201e-06	2011.4	677.84
C4orf19	180.767	447.775	173.015	70.5921	73.1867	-1.65146	0.00161241	0.0150985	314.271	105.598
LOC283575	870.314	807.352	311.643	383.487	92.2353	-1.65753	0.00733922	0.0429212	838.833	262.455
ZNF697	894.257	1365.38	462.091	356.776	219.56	-1.66462	6.71001e-07	5.4511e-05	1129.82	346.142
LINC01537	20.3512	39.0107	9.67167	9.53947	7.0179	-1.66673	0.00805646	0.0454894	29.681	8.74301
LOC101927069	1727.46	1921.7	360.001	1216.28	434.107	-1.66765	3.83672e-06	0.000195311	1824.58	670.13
SH3BGRL2	2224.27	2634.07	582.449	894.802	790.015	-1.66921	0.00538588	0.0346797	2429.17	755.756
MTRNR2L9	100.559	183.181	104.239	34.3421	15.0384	-1.6735	0.000870171	0.00985083	141.87	51.2065
SDC2	165.204	100.071	27.9404	68.6842	32.0818	-1.6736	0.00897554	0.0492916	132.638	42.9021
ARHGEF40	12395.1	25292.5	7754.53	4088.62	5734.63	-1.67773	1.98018e-05	0.000650887	18843.8	5859.26
SPATA6	2281.73	2354.21	1362.63	585.723	328.839	-1.68043	2.79083e-06	0.00015462	2317.97	759.064
CCDC153	138.867	434.206	97.7913	74.4079	75.1918	-1.68418	0.000986298	0.0106649	286.537	82.4637
LRRC6	1923.79	2964.81	1658.15	209.868	1169.98	-1.68928	0.000800333	0.009254	2444.3	1012.67
CCL3	125.699	1080.43	132.179	168.849	179.458	-1.69045	0.00411333	0.0285872	603.063	160.162
HAS1	64.6451	44.0991	46.2091	4.76973	19.0486	-1.69274	0.00224255	0.0188026	54.3721	23.3425
CCDC85B	41.8996	39.0107	25.7911	1.90789	21.0537	-1.70033	0.00724464	0.0425267	40.4552	16.2509
PLCL1	3246.62	3970.61	1199.29	1130.43	1024.61	-1.70843	1.71671e-05	0.000590019	3608.62	1118.11
VEPH1	181.964	303.605	80.5972	40.0658	104.266	-1.71223	0.00155182	0.0147104	242.785	74.9763
MIR2355	22.7455	67.8447	29.015	1.90789	20.0511	-1.72578	0.000238929	0.00391858	45.2951	16.9913
ABCC5	5208.72	10870.4	2870.34	2822.73	1203.07	-1.73999	6.45633e-05	0.00152914	8039.57	2298.71
LINC01151	125.699	240.849	53.7315	34.3421	71.1816	-1.74023	0.00240895	0.0198244	183.274	53.085
HSD3BP4	52.6738	52.5797	41.9106	7.63158	6.01534	-1.74304	0.00510629	0.0334985	52.6267	18.5192
LOC100129973	38.3082	28.834	15.0448	6.67763	11.0281	-1.75388	0.00211132	0.0181211	33.5711	10.9169
RAPGEFL1	1483.25	4898.39	1067.11	649.638	1030.63	-1.76235	0.000408254	0.00572035	3190.82	915.791
SULF2	14666.1	14118.5	4563.95	3993.22	3913.98	-1.76404	1.42565e-06	9.63805e-05	14392.3	4157.05
CMTM2	7824.45	18280.8	4989.51	3489.54	2675.83	-1.76877	0.00146443	0.0141641	13052.6	3718.29
CCDC170	633.282	1168.63	298.747	236.579	249.637	-1.77311	2.19734e-05	0.000703105	900.954	261.654
MIR29C	586.594	1226.29	369.673	213.684	218.557	-1.77695	6.41926e-05	0.00152728	906.444	267.305
BBC3	122.107	108.552	17.1941	34.3421	50.1279	-1.79353	0.00208024	0.0179209	115.329	33.888
KRT23	4679.58	10451.5	1847.29	750.756	4077.4	-1.80639	0.00765249	0.0441116	7565.53	2225.15
MIR21	95.7705	105.159	37.612	20.0329	26.0665	-1.80853	0.00241766	0.0198607	100.465	27.9038
B4GALT1-AS1	88.5877	101.767	42.9852	20.9868	20.0511	-1.80973	6.17191e-05	0.00149798	95.1774	28.0077
LOC101929595	62.2508	142.474	21.4926	32.4342	32.0818	-1.81267	3.81909e-05	0.00105794	102.362	28.6695
SFRP2	77.8135	113.64	39.7613	17.171	29.0742	-1.81426	4.88142e-05	0.00126089	95.7267	28.6688
SLC4A9	46.6881	57.668	19.3433	11.4474	20.0511	-1.81514	0.00543706	0.034909	52.1781	16.9473
SSPN	367.519	69.5408	46.2091	42.9276	68.1739	-1.8219	0.00186733	0.0165412	218.53	52.4369
PPM1E	56.2652	110.248	33.3135	17.171	21.0537	-1.82853	0.000360694	0.00530518	83.2564	23.8461
TMEM119	930.171	1048.2	241.792	235.625	357.913	-1.83422	6.85666e-07	5.54152e-05	989.186	278.443
PTTG2	329.211	390.107	185.911	55.3289	88.225	-1.83982	4.63238e-05	0.00121864	359.659	109.822
SOX13	475.261	296.821	130.03	97.3026	87.2225	-1.84125	0.00165728	0.0154211	386.041	104.852
NUP50-AS1	1415.01	1333.15	409.434	412.105	324.829	-1.84173	1.30688e-07	1.52914e-05	1374.08	382.123
CCDC36	399.842	439.295	221.374	63.9144	111.284	-1.84343	3.31441e-06	0.000175563	419.568	132.191
METTL21EP	25.1397	67.8447	26.8657	7.63158	7.0179	-1.84733	0.00738832	0.0431279	46.4922	13.8384
AOC4P	76.6164	69.5408	32.2389	9.53947	27.069	-1.85295	5.85295e-05	0.00144236	73.0786	22.9491
KATNBL1	6621.33	12447.8	4396.31	1973.72	1253.2	-1.85904	3.14177e-06	0.000170449	9534.57	2541.07
VWF	232.243	356.185	45.1345	82.9934	114.292	-1.8677	0.00218155	0.0185089	294.214	80.8065
SERPINA9	73.025	113.64	46.2091	8.58552	44.1125	-1.87562	0.00039235	0.0056026	93.3325	32.969
BEND7	743.418	1545.16	253.613	435.954	218.557	-1.88518	0.00280672	0.0219839	1144.29	302.708
CREG2	39.5053	37.3146	7.52241	11.4474	13.0332	-1.89229	0.00369681	0.0266004	38.41	10.6677
PIAS2	6366.34	7422.21	4913.21	965.394	815.079	-1.89257	0.000385759	0.00553952	6894.28	2231.23
MIR3939	15.5627	52.5797	7.52241	4.76973	13.0332	-1.91235	0.00525466	0.0341858	34.0712	8.4418
WFDC12	29.9283	22.0495	12.8956	2.86184	8.02046	-1.91561	0.000943214	0.0103129	25.9889	7.92595
NLRP6	1517.96	3392.24	1492.66	245.164	514.312	-1.92308	3.03173e-07	2.91297e-05	2455.1	750.712
DSC2	8810.88	15344.8	2064.36	1156.18	6806.36	-1.92435	0.000745578	0.00880265	12077.8	3342.3
PRMT5-AS1	40.7025	35.6185	15.0448	7.63158	11.0281	-1.93145	0.00270641	0.0214397	38.1605	11.2348
AQP1	73.025	40.7068	18.2687	7.63158	24.0614	-1.94001	0.0012302	0.0125709	56.8659	16.6539
PHF13	4356.36	2630.68	2283.59	409.243	1053.69	-1.94418	1.62712e-06	0.000106477	3493.52	1248.84
MAP7	287.311	203.534	93.4928	41.0197	56.1432	-1.95601	0.0033998	0.0250261	245.423	63.5519
PTRF	16.7598	32.2262	4.29852	7.63158	6.01534	-1.9641	0.000365554	0.00534873	24.493	5.98181
WASF3	159.218	152.651	13.9702	43.8816	59.1509	-1.97287	0.00221753	0.0186527	155.935	39.0009
NT5M	120.91	162.827	17.1941	49.6052	41.1048	-1.98973	0.000121624	0.00240776	141.869	35.9681
SERPINA11	135.276	191.661	42.9852	28.6184	57.1458	-1.99294	3.96509e-06	0.000199301	163.469	42.9165
LINC00671	2014.77	3531.32	1285.26	393.98	514.312	-2.00497	1.92322e-06	0.000120136	2773.04	731.183
PHOSPHO1	3120.92	9296.42	2800.49	1577.83	748.91	-2.01493	0.00390214	0.0274973	6208.67	1709.07
CORIN	122.107	213.711	88.1196	20.0329	38.0972	-2.02008	0.00400893	0.0280323	167.909	48.7499
COL9A2	3854.76	3823.05	1340.06	1070.33	389.995	-2.02837	0.000138683	0.00263885	3838.91	933.462
CCDC3	13.1684	27.1379	3.22389	6.67763	4.01023	-2.04094	0.0054437	0.0349373	20.1532	4.63725
TNFRSF12A	383.082	274.771	94.5674	58.1908	92.2353	-2.06374	1.60399e-06	0.000106113	328.927	81.6645
CASC15	37.1111	27.1379	2.14926	13.3553	9.02302	-2.07789	0.00518913	0.0339284	32.1245	8.17584
WWC1	64.6451	49.1874	8.59704	13.3553	16.0409	-2.08247	0.000737616	0.00874156	56.9162	12.6644
TIAM2	2420.6	725.939	584.599	362.5	212.542	-2.08449	0.000507484	0.00665288	1573.27	386.547
IL1RL2	20.3512	45.7952	21.4926	1.90789	6.01534	-2.08776	0.00665213	0.0399922	33.0732	9.80528
EHD2	16.7598	16.9612	1.07463	6.67763	5.01279	-2.08946	0.00902041	0.0494687	16.8605	4.25501
BEND2	620.114	883.678	180.538	127.829	230.588	-2.11125	0.000772605	0.00903077	751.896	179.652
IER5L	63.4479	8.48059	10.7463	5.72368	11.0281	-2.11822	0.00386854	0.0273835	35.9643	9.16604
BRD7P3	59.8565	66.1486	21.4926	8.58552	14.0358	-2.13848	2.55882e-08	4.40876e-06	63.0026	14.7046
RPGRIP1	2504.4	2289.76	655.524	525.625	450.148	-2.14612	1.31341e-05	0.000489142	2397.08	543.766
LIPN	2782.13	3646.65	1116.54	677.302	293.749	-2.16214	0.000510882	0.00668624	3214.39	695.864
SAMD14	114.925	184.877	33.3135	18.125	50.1279	-2.16899	9.9744e-05	0.00211336	149.901	33.8555
ACSBG1	93.3762	130.601	25.7911	18.125	31.0793	-2.17022	0.000468922	0.00628417	111.989	24.9985
P4HA2	58.6594	42.403	24.7165	12.4013	3.00767	-2.17345	0.00218396	0.0185193	50.5312	13.3752
PLXNA2	2026.74	2854.57	1098.27	302.401	329.841	-2.18635	4.09169e-06	0.000204311	2440.65	576.838
SULT1A2	301.677	824.313	83.8211	101.118	176.45	-2.18762	0.000467371	0.00628226	562.995	120.463
SOX6	83.7992	147.562	51.5822	7.63158	35.0895	-2.18822	0.000289777	0.00453434	115.681	31.4344
SEC14L5	295.691	283.252	17.1941	179.342	46.1176	-2.19193	0.00627485	0.0384946	289.472	80.8846
SPDYE4	86.1934	74.6292	24.7165	8.58552	20.0511	-2.20754	0.000279847	0.00442757	80.4113	17.7844
FABP6	590.186	1261.91	368.598	77.2697	235.601	-2.20888	3.40902e-13	4.8591e-10	926.049	227.156
SLC25A27	183.161	94.9826	41.9106	13.3553	39.0997	-2.21531	2.44703e-06	0.000142628	139.072	31.4552
MOCS1	80.2078	284.948	182.687	10.4934	13.0332	-2.23233	0.00356471	0.0259115	182.578	68.7379
LOC101927854	372.308	649.613	109.612	165.033	111.284	-2.25427	0.00276029	0.021748	510.96	128.643
DPEP3	2019.56	2198.17	568.479	403.52	351.898	-2.26278	4.81131e-09	1.16056e-06	2108.86	441.299
GPR21	31.1254	16.9612	7.52241	1.90789	8.02046	-2.2634	0.00216199	0.0183733	24.0433	5.81692
MIR29B2	458.501	632.652	238.568	74.4079	62.1585	-2.26737	3.53443e-05	0.000996696	545.577	125.045
LOC643406	28.7311	11.8728	4.29852	0.953947	10.0256	-2.27377	0.00433556	0.0296585	20.302	5.09268
PTPRF	25.1397	79.7176	3.22389	7.63158	20.0511	-2.27839	0.00332762	0.0246568	52.4287	10.3022
LOC101928694	178.373	159.435	38.6867	34.3421	47.1202	-2.28127	0.000453662	0.00617436	168.904	40.0497
CASR	40.7025	62.7564	12.8956	13.3553	6.01534	-2.28574	9.48327e-05	0.00203962	51.7294	10.7554
SLPI	5868.34	8641.72	2124.54	815.625	2002.11	-2.29049	0.00175871	0.0160693	7255.03	1647.42
DCLK3	21.5484	42.403	11.8209	0.953947	9.02302	-2.29367	0.00557073	0.0353722	31.9757	7.26596
COL27A1	59.8565	125.513	33.3135	10.4934	15.0384	-2.2996	0.000464081	0.00625651	92.6846	19.6151
ANKUB1	38.3082	59.3641	19.3433	10.4934	6.01534	-2.32324	0.00436165	0.029785	48.8362	11.9507
TMED11P	45.491	108.552	46.2091	7.63158	7.0179	-2.32792	0.00517038	0.0338299	77.0213	20.2862
RAB3C	27.534	23.7457	11.8209	0.953947	4.01023	-2.3552	0.00323309	0.0241506	25.6398	5.59503
AQP7P1	43.0967	118.728	8.59704	48.6513	6.01534	-2.3649	0.0077433	0.0443823	80.9125	21.0879
FAM169B	126.896	96.6787	47.2837	11.4474	21.0537	-2.38477	0.000116855	0.00234326	111.787	26.5949
RYR2	45.491	49.1874	15.0448	4.76973	11.0281	-2.40952	0.00102221	0.0109401	47.3392	10.2809
CABP5	453.713	466.433	68.7763	57.2368	140.358	-2.43284	0.00131917	0.0132161	460.073	88.7904
RAI2	44.2938	196.75	23.6419	10.4934	23.0588	-2.43614	0.000293807	0.00458354	120.522	19.0647
EFNA5	39.5053	378.234	63.4032	41.9737	13.0332	-2.46008	0.00218555	0.0185228	208.87	39.47
GGTA1P	761.375	941.346	124.657	323.388	89.2276	-2.47583	2.35173e-08	4.143e-06	851.36	179.091
KCNH3	447.727	505.443	263.284	19.0789	56.1432	-2.47936	0.000401217	0.00567238	476.585	112.835
CNTNAP3	9682.4	23301.3	4437.15	1549.21	2690.86	-2.49392	9.65438e-06	0.000393172	16491.8	2892.41
HRASLS	77.8135	130.601	18.2687	10.4934	26.0665	-2.50275	4.7883e-05	0.00125279	104.207	18.2762
GPR87	68.2365	55.9719	11.8209	2.86184	27.069	-2.52335	0.000385834	0.00553952	62.1042	13.9173
TMEM253	152.036	176.396	48.3583	18.125	26.0665	-2.52358	8.38753e-06	0.000351626	164.216	30.8499
MCAM	79.0106	653.006	117.135	31.4802	42.1074	-2.52909	4.38949e-05	0.00116649	366.008	63.5741
MYL9	3456.12	4294.57	412.658	497.006	1049.68	-2.54612	0.000167056	0.00302443	3875.34	653.114
CALD1	383.082	218.799	25.7911	49.6052	70.179	-2.5566	0.00040019	0.00567238	300.941	48.5251
TREML5P	124.502	206.926	45.1345	13.3553	32.0818	-2.56509	0.00285605	0.0221903	165.714	30.1905
GSG1L	68.2365	54.2758	16.1194	3.81579	16.0409	-2.62648	0.000254557	0.00411888	61.2561	11.9921
PTP4A3	623.705	1468.84	113.911	118.289	272.696	-2.64137	3.07789e-05	0.000900339	1046.27	168.299
AICDA	37.1111	37.3146	10.7463	4.76973	3.00767	-2.66597	0.000237174	0.00390205	37.2128	6.17457
THCAT158	41.8996	78.0214	7.52241	11.4474	9.02302	-2.67223	0.000205944	0.00351359	59.9605	9.33093
GRAMD1C	2253	2510.25	704.957	321.48	134.343	-2.722	9.602e-06	0.000392057	2381.63	386.927
TMC5	94.5733	578.376	56.9554	42.9276	22.0563	-2.73078	5.45405e-06	0.00025372	336.475	40.6464
CAPN13	319.634	330.743	46.2091	28.6184	98.2506	-2.73407	0.000492582	0.006501	325.189	57.6927
ST8SIA5	34.7168	71.237	21.4926	1.90789	8.02046	-2.73744	0.0069543	0.0412698	52.9769	10.4736
LOC105375734	28.7311	35.6185	4.29852	1.90789	9.02302	-2.75339	0.000666703	0.00819296	32.1748	5.07648
LINC01305	63.4479	54.2758	4.29852	6.67763	19.0486	-2.77147	0.00325574	0.0242733	58.8619	10.0082
LINC00639	228.652	1350.11	139.702	58.1908	115.294	-2.79645	0.00117103	0.0121755	789.381	104.396
SCN2B	99.3619	103.463	19.3433	5.72368	26.0665	-2.8015	0.00213257	0.0181929	101.413	17.0445
ANOS1	96.9676	74.6292	13.9702	13.3553	13.0332	-2.81055	0.000365309	0.00534873	85.7984	13.4529
FAM71F1	41.8996	72.9331	19.3433	2.86184	6.01534	-2.81372	0.00169929	0.0157095	57.4163	9.40684
BAIAP3	666.802	683.536	256.837	27.6645	123.315	-2.81414	4.98558e-10	1.98938e-07	675.169	135.939
HSPA1B	958.902	481.698	65.5524	138.322	153.391	-2.86642	7.19799e-08	1.02598e-05	720.3	119.089
FLT1	897.848	4667.72	974.689	158.355	77.1969	-2.8885	0.00305462	0.0232539	2782.78	403.414
OLIG2	7.18279	66.1486	1.07463	5.72368	7.0179	-2.9177	0.0016695	0.0155164	36.6657	4.6054
MKX	43.0967	8.48059	3.22389	2.86184	4.01023	-2.97876	0.000603779	0.00758545	25.7887	3.36532
IL12B	14.3656	37.3146	1.07463	3.81579	3.00767	-3.08491	0.00256051	0.0205773	25.8401	2.6327
ORM1	2493.62	7546.03	778.032	470.296	115.294	-3.12871	0.000500808	0.00659293	5019.83	454.541
CDH2	81.4049	132.297	13.9702	3.81579	20.0511	-3.18503	6.36154e-05	0.00151875	106.851	12.6124
NOV	2926.99	2355.91	752.241	115.428	215.55	-3.18521	2.50618e-05	0.000771991	2641.45	361.073
PI3	1169.6	6813.31	339.583	162.171	570.455	-3.18987	0.00180231	0.0162966	3991.45	357.403
CD9	4058.27	2963.12	101.015	857.598	452.153	-3.19497	5.3397e-10	1.98938e-07	3510.7	470.256
PHF24	216.681	798.872	237.493	24.8026	3.00767	-3.20117	0.00623615	0.0382982	507.776	88.4345
TMTC1	1392.26	3059.8	30.0896	426.414	371.949	-3.21438	0.0022306	0.0187225	2226.03	276.151
ANGPT1	307.663	907.423	63.4032	107.796	45.1151	-3.27964	3.96782e-06	0.000199301	607.543	72.1047
RGS7	55.068	91.5904	8.59704	4.76973	8.02046	-3.33148	2.62861e-07	2.64192e-05	73.3292	7.12908
LIFR	58.6594	325.655	39.7613	5.72368	4.01023	-3.44938	0.00241814	0.0198607	192.157	16.4984
NECAB2	824.823	1755.48	247.165	25.7566	157.401	-3.44959	7.87454e-09	1.78499e-06	1290.15	143.441
SPTSSB	15.5627	308.694	6.44778	71.546	12.0307	-3.47064	0.000933905	0.010254	162.128	30.0082
ITGB4	56.2652	362.969	15.0448	1.90789	29.0742	-3.4866	3.96589e-05	0.00107772	209.617	15.3423
KCNMA1	872.708	975.268	191.284	20.9868	154.394	-3.56499	0.00589246	0.0367507	923.988	122.222
MADCAM1	38.3082	59.3641	6.44778	1.90789	4.01023	-3.7156	0.00179475	0.0162471	48.8362	4.12197
COL13A1	5.98565	117.032	5.37315	25.7566	8.02046	-3.72694	0.00233323	0.0193867	61.5089	13.0501
DDX11L9	23.9426	142.474	4.29852	4.76973	6.01534	-3.91126	1.22984e-05	0.000468027	83.2083	5.02787
RIPK4	49.0824	291.732	5.37315	5.72368	27.069	-4.04096	0.000686993	0.00834343	170.407	12.722
DDX11L1	9.57705	86.502	2.14926	0.953947	5.01279	-4.37472	0.000939389	0.0102926	48.0395	2.70533
FOXQ1	8.37992	122.121	2.14926	1.90789	4.01023	-4.88997	0.00719328	0.0423203	65.2502	2.68913
C4BPA	4177.99	659.79	155.821	62.0066	32.0818	-5.46045	7.02813e-05	0.00163736	2418.89	83.3032
NEBL	29.9283	2418.66	5.37315	13.3553	14.0358	-6.04169	0.000553481	0.00710732	1224.3	10.9214
SPP1	521.949	863.324	56.9554	1.90789	3.00767	-6.05756	6.38571e-06	0.000286061	692.637	20.6236
MIR6723	829.612	622.475	4.29852	5.72368	2.00511	-8.17031	8.61669e-07	6.52662e-05	726.044	4.00911

## Sheet: GSEA-H
Gene Set Name	# Genes in Gene Set (K)	Description	# Genes in Overlap (k)	k/K	p-value	FDR q-value
HALLMARK_INTERFERON_GAMMA_RESPONSE	200	Genes up-regulated in response to IFNG [GeneID=3458].	17	0.085	3.22e-11	1.61e-09
HALLMARK_INTERFERON_ALPHA_RESPONSE	97	Genes up-regulated in response to alpha interferon proteins.	11	0.1134	4.79e-09	1.2e-07
HALLMARK_IL2_STAT5_SIGNALING	199	Genes up-regulated by STAT5 in response to IL2 stimulation.	14	0.0704	2.03e-08	3.39e-07
HALLMARK_INFLAMMATORY_RESPONSE	200	Genes defining inflammatory response.	11	0.055	7.35e-06	9.19e-05
HALLMARK_COMPLEMENT	200	Genes encoding components of the complement system, which is part of the innate immune system.	10	0.05	4.3e-05	0.00043
HALLMARK_UV_RESPONSE_DN	144	Genes down-regulated in response to ultraviolet (UV) radiation.	8	0.0556	0.000121	0.00101
Gene Symbol	HALLMARK_INTERFERON_GAMMA_RESPONSE	HALLMARK_INTERFERON_ALPHA_RESPONSE	HALLMARK_IL2_STAT5_SIGNALING	HALLMARK_INFLAMMATORY_RESPONSE	HALLMARK_COMPLEMENT
CXCL10	HALLMARK_INTERFERON_GAMMA_RESPONSE	HALLMARK_INTERFERON_ALPHA_RESPONSE	HALLMARK_IL2_STAT5_SIGNALING	HALLMARK_INFLAMMATORY_RESPONSE
GBP4	HALLMARK_INTERFERON_GAMMA_RESPONSE	HALLMARK_INTERFERON_ALPHA_RESPONSE	HALLMARK_IL2_STAT5_SIGNALING
RTP4	HALLMARK_INTERFERON_GAMMA_RESPONSE	HALLMARK_INTERFERON_ALPHA_RESPONSE		HALLMARK_INFLAMMATORY_RESPONSE
LAP3	HALLMARK_INTERFERON_GAMMA_RESPONSE	HALLMARK_INTERFERON_ALPHA_RESPONSE			HALLMARK_COMPLEMENT
IFI44L	HALLMARK_INTERFERON_GAMMA_RESPONSE	HALLMARK_INTERFERON_ALPHA_RESPONSE
BATF2	HALLMARK_INTERFERON_GAMMA_RESPONSE	HALLMARK_INTERFERON_ALPHA_RESPONSE
HERC6	HALLMARK_INTERFERON_GAMMA_RESPONSE	HALLMARK_INTERFERON_ALPHA_RESPONSE
DHX58	HALLMARK_INTERFERON_GAMMA_RESPONSE	HALLMARK_INTERFERON_ALPHA_RESPONSE
GCH1	HALLMARK_INTERFERON_GAMMA_RESPONSE			HALLMARK_INFLAMMATORY_RESPONSE
CASP7	HALLMARK_INTERFERON_GAMMA_RESPONSE				HALLMARK_COMPLEMENT
SOCS3	HALLMARK_INTERFERON_GAMMA_RESPONSE
CD274	HALLMARK_INTERFERON_GAMMA_RESPONSE
GBP6	HALLMARK_INTERFERON_GAMMA_RESPONSE
SAMHD1	HALLMARK_INTERFERON_GAMMA_RESPONSE
OAS2	HALLMARK_INTERFERON_GAMMA_RESPONSE
XAF1	HALLMARK_INTERFERON_GAMMA_RESPONSE
APOL6	HALLMARK_INTERFERON_GAMMA_RESPONSE
LAMP3		HALLMARK_INTERFERON_ALPHA_RESPONSE		HALLMARK_INFLAMMATORY_RESPONSE
NCOA7		HALLMARK_INTERFERON_ALPHA_RESPONSE
MOV10		HALLMARK_INTERFERON_ALPHA_RESPONSE
MYC			HALLMARK_IL2_STAT5_SIGNALING	HALLMARK_INFLAMMATORY_RESPONSE
BCL2			HALLMARK_IL2_STAT5_SIGNALING
TGM2			HALLMARK_IL2_STAT5_SIGNALING
RORA			HALLMARK_IL2_STAT5_SIGNALING
IL2RA			HALLMARK_IL2_STAT5_SIGNALING
ABCB1			HALLMARK_IL2_STAT5_SIGNALING
BMPR2			HALLMARK_IL2_STAT5_SIGNALING
CCR4			HALLMARK_IL2_STAT5_SIGNALING
CTLA4			HALLMARK_IL2_STAT5_SIGNALING
ICOS			HALLMARK_IL2_STAT5_SIGNALING
TLR7			HALLMARK_IL2_STAT5_SIGNALING
CDCP1			HALLMARK_IL2_STAT5_SIGNALING
TLR3				HALLMARK_INFLAMMATORY_RESPONSE
FZD5				HALLMARK_INFLAMMATORY_RESPONSE
CCR7				HALLMARK_INFLAMMATORY_RESPONSE
KCNA3				HALLMARK_INFLAMMATORY_RESPONSE
P2RX7				HALLMARK_INFLAMMATORY_RESPONSE
AXL				HALLMARK_INFLAMMATORY_RESPONSE
C2					HALLMARK_COMPLEMENT
TMPRSS6					HALLMARK_COMPLEMENT
C1QA					HALLMARK_COMPLEMENT
HPCAL4					HALLMARK_COMPLEMENT
DOCK10					HALLMARK_COMPLEMENT
ERAP2					HALLMARK_COMPLEMENT
C1QC					HALLMARK_COMPLEMENT
DYRK2					HALLMARK_COMPLEMENT

## Sheet: GSEA-C2
Gene Set Name	# Genes in Gene Set (K)	Description	# Genes in Overlap (k)	k/K	p-value	FDR q-value
BLANCO_MELO_HUMAN_PARAINFLUENZA_VIRUS_3_INFECTION_A594_CELLS_UP	204	Genes up-regulated in HPIV3 (A549 cells, MOI: 2, 24hpi)	25	0.1225	1.07e-19	6.72e-16
REACTOME_RNA_POLYMERASE_II_TRANSCRIPTION	1374	RNA Polymerase II Transcription	52	0.0378	4.7e-16	1.48e-12
BOSCO_TH1_CYTOTOXIC_MODULE	114	Genes representing Th1 / cytotoxic module in sputum during asthma exacerbations.	17	0.1491	2.9e-15	5.68e-12
BLANCO_MELO_RESPIRATORY_SYNCYTIAL_VIRUS_INFECTION_A594_CELLS_UP	286	Genes up-regulated in RSV (A549 cells, MOI: 2, 24hpi)	24	0.0839	3.61e-15	5.68e-12
NUYTTEN_EZH2_TARGETS_UP	1033	Genes up-regulated in PC3 cells (prostate cancer) after knockdown of EZH2 [GeneID=2146] by RNAi.	43	0.0416	7.79e-15	9.8e-12
BLANCO_MELO_BETA_INTERFERON_TREATED_BRONCHIAL_EPITHELIAL_CELLS_UP	378	Genes up-regulated on treatment of normal human bronchial epithelial cells with beta interferon (hIFNB treatment 100u/ml, 4-12hrs).	25	0.0661	2.19e-13	2.18e-10
BLANCO_MELO_BRONCHIAL_EPITHELIAL_CELLS_INFLUENZA_A_DEL_NS1_INFECTION_UP	644	Genes up-regulated on infection of normal human bronchial epithelial cells by mutant Influenza A lacking its antiviral antagonist (IAV_NS1) (MOI: 3, 12hpi)	32	0.0497	2.42e-13	2.18e-10
DODD_NASOPHARYNGEAL_CARCINOMA_DN	1408	Genes down-regulated in nasopharyngeal carcinoma (NPC) compared to the normal tissue.	48	0.0341	3.25e-13	2.52e-10
ZHENG_BOUND_BY_FOXP3	495	Genes whose promoters are bound by FOXP3 [GeneID=50943] based an a ChIP-chip analysis.	28	0.0566	3.6e-13	2.52e-10
HECKER_IFNB1_TARGETS	95	Genes transcriptionally modulated in the blood of multiple sclerosis patients in response to subcutaneous treatment with recombinant IFNB1 [GeneID = 3456].	14	0.1474	9.84e-13	6.19e-10
XIE_ST_HSC_S1PR3_OE_UP	188	Genes upregulated in short-term hematopoietic stem cells (CD34+,CD38_,CD45RA_,CD90_,CD49f_) upon overexpression of Sphingosine-1-Phosphate Receptor 3 (S1PR3)	18	0.0957	1.12e-12	6.41e-10
BOSCO_INTERFERON_INDUCED_ANTIVIRAL_MODULE	78	Genes representing interferon-induced antiviral module in sputum during asthma exacerbations.	13	0.1667	1.25e-12	6.55e-10
GRYDER_PAX3FOXO1_ENHANCERS_IN_TADS	1008	Expressed genes (FPKM>1) associated with high-confidence PAX3-FOXO1 sites with enhancers in primary tumors and cell lines, restricted to those within topological domain boundaries	39	0.0387	1.43e-12	6.93e-10
BLANCO_MELO_COVID19_SARS_COV_2_INFECTION_CALU3_CELLS_UP	339	Genes up-regulated in SARS-CoV-2 infection (Calu-3 cells, MOI: 2, 24hpi)	22	0.0649	8.94e-12	4.02e-09
SANA_RESPONSE_TO_IFNG_UP	76	Genes up-regulated in five primary endothelial cell types (lung, aortic, iliac, dermal, and colon) by IFNG [GeneID=3458].	12	0.1579	1.8e-11	7.56e-09
KRIGE_RESPONSE_TO_TOSEDOSTAT_24HR_DN	1047	Genes down-regulated in HL-60 cells (acute promyelocytic leukemia, APL) after treatment with the aminopeptidase inhibitor tosedostat (CHR-2797) [PubChem=15547703] for 24 h.	37	0.0353	7.32e-11	2.88e-08
REACTOME_CYTOKINE_SIGNALING_IN_IMMUNE_SYSTEM	719	Cytokine Signaling in Immune system	30	0.0417	1.02e-10	3.59e-08
TAKEDA_TARGETS_OF_NUP98_HOXA9_FUSION_3D_UP	186	Genes up-regulated in CD34+ [GeneID=947] hematopoetic cells by expression of NUP98-HOXA9 fusion [GeneID=4928;3205] off a retroviral vector at 3 days after transduction.	16	0.086	1.03e-10	3.59e-08
LEE_BMP2_TARGETS_DN	898	Genes down-regulated in uterus upon knockout of BMP2 [GeneID=650].	32	0.0356	1.21e-09	4.02e-07
BROWNE_INTERFERON_RESPONSIVE_GENES	67	Genes up-regulated in primary fibroblast culture after treatment with interferon alpha for 6 h.	10	0.1493	1.57e-09	4.83e-07
Gene Symbol	BLANCO_MELO_HUMAN_PARAINFLUENZA_VIRUS_3_INFECTION_A594_CELLS_UP	BLANCO_MELO_RESPIRATORY_SYNCYTIAL_VIRUS_INFECTION_A594_CELLS_UP	BLANCO_MELO_BETA_INTERFERON_TREATED_BRONCHIAL_EPITHELIAL_CELLS_UP	BLANCO_MELO_BRONCHIAL_EPITHELIAL_CELLS_INFLUENZA_A_DEL_NS1_INFECTION_UP	HECKER_IFNB1_TARGETS	BOSCO_INTERFERON_INDUCED_ANTIVIRAL_MODULE	BLANCO_MELO_COVID19_SARS_COV_2_INFECTION_CALU3_CELLS_UP	SANA_RESPONSE_TO_IFNG_UP	REACTOME_CYTOKINE_SIGNALING_IN_IMMUNE_SYSTEM	BROWNE_INTERFERON_RESPONSIVE_GENES
BATF2	BLANCO_MELO_HUMAN_PARAINFLUENZA_VIRUS_3_INFECTION_A594_CELLS_UP	BLANCO_MELO_RESPIRATORY_SYNCYTIAL_VIRUS_INFECTION_A594_CELLS_UP	BLANCO_MELO_BETA_INTERFERON_TREATED_BRONCHIAL_EPITHELIAL_CELLS_UP	BLANCO_MELO_BRONCHIAL_EPITHELIAL_CELLS_INFLUENZA_A_DEL_NS1_INFECTION_UP			BLANCO_MELO_COVID19_SARS_COV_2_INFECTION_CALU3_CELLS_UP	SANA_RESPONSE_TO_IFNG_UP
CXCL10	BLANCO_MELO_HUMAN_PARAINFLUENZA_VIRUS_3_INFECTION_A594_CELLS_UP	BLANCO_MELO_RESPIRATORY_SYNCYTIAL_VIRUS_INFECTION_A594_CELLS_UP		BLANCO_MELO_BRONCHIAL_EPITHELIAL_CELLS_INFLUENZA_A_DEL_NS1_INFECTION_UP	HECKER_IFNB1_TARGETS		BLANCO_MELO_COVID19_SARS_COV_2_INFECTION_CALU3_CELLS_UP	SANA_RESPONSE_TO_IFNG_UP	REACTOME_CYTOKINE_SIGNALING_IN_IMMUNE_SYSTEM	BROWNE_INTERFERON_RESPONSIVE_GENES
HERC6	BLANCO_MELO_HUMAN_PARAINFLUENZA_VIRUS_3_INFECTION_A594_CELLS_UP	BLANCO_MELO_RESPIRATORY_SYNCYTIAL_VIRUS_INFECTION_A594_CELLS_UP		BLANCO_MELO_BRONCHIAL_EPITHELIAL_CELLS_INFLUENZA_A_DEL_NS1_INFECTION_UP	HECKER_IFNB1_TARGETS
APOL3	BLANCO_MELO_HUMAN_PARAINFLUENZA_VIRUS_3_INFECTION_A594_CELLS_UP	BLANCO_MELO_RESPIRATORY_SYNCYTIAL_VIRUS_INFECTION_A594_CELLS_UP		BLANCO_MELO_BRONCHIAL_EPITHELIAL_CELLS_INFLUENZA_A_DEL_NS1_INFECTION_UP			BLANCO_MELO_COVID19_SARS_COV_2_INFECTION_CALU3_CELLS_UP	SANA_RESPONSE_TO_IFNG_UP
RTP4	BLANCO_MELO_HUMAN_PARAINFLUENZA_VIRUS_3_INFECTION_A594_CELLS_UP		BLANCO_MELO_BETA_INTERFERON_TREATED_BRONCHIAL_EPITHELIAL_CELLS_UP	BLANCO_MELO_BRONCHIAL_EPITHELIAL_CELLS_INFLUENZA_A_DEL_NS1_INFECTION_UP	HECKER_IFNB1_TARGETS		BLANCO_MELO_COVID19_SARS_COV_2_INFECTION_CALU3_CELLS_UP
IL4I1	BLANCO_MELO_HUMAN_PARAINFLUENZA_VIRUS_3_INFECTION_A594_CELLS_UP
XAF1	BLANCO_MELO_HUMAN_PARAINFLUENZA_VIRUS_3_INFECTION_A594_CELLS_UP	BLANCO_MELO_RESPIRATORY_SYNCYTIAL_VIRUS_INFECTION_A594_CELLS_UP	BLANCO_MELO_BETA_INTERFERON_TREATED_BRONCHIAL_EPITHELIAL_CELLS_UP	BLANCO_MELO_BRONCHIAL_EPITHELIAL_CELLS_INFLUENZA_A_DEL_NS1_INFECTION_UP	HECKER_IFNB1_TARGETS	BOSCO_INTERFERON_INDUCED_ANTIVIRAL_MODULE	BLANCO_MELO_COVID19_SARS_COV_2_INFECTION_CALU3_CELLS_UP		REACTOME_CYTOKINE_SIGNALING_IN_IMMUNE_SYSTEM	BROWNE_INTERFERON_RESPONSIVE_GENES
LAP3	BLANCO_MELO_HUMAN_PARAINFLUENZA_VIRUS_3_INFECTION_A594_CELLS_UP	BLANCO_MELO_RESPIRATORY_SYNCYTIAL_VIRUS_INFECTION_A594_CELLS_UP	BLANCO_MELO_BETA_INTERFERON_TREATED_BRONCHIAL_EPITHELIAL_CELLS_UP	BLANCO_MELO_BRONCHIAL_EPITHELIAL_CELLS_INFLUENZA_A_DEL_NS1_INFECTION_UP	HECKER_IFNB1_TARGETS			SANA_RESPONSE_TO_IFNG_UP
SAMHD1	BLANCO_MELO_HUMAN_PARAINFLUENZA_VIRUS_3_INFECTION_A594_CELLS_UP	BLANCO_MELO_RESPIRATORY_SYNCYTIAL_VIRUS_INFECTION_A594_CELLS_UP	BLANCO_MELO_BETA_INTERFERON_TREATED_BRONCHIAL_EPITHELIAL_CELLS_UP	BLANCO_MELO_BRONCHIAL_EPITHELIAL_CELLS_INFLUENZA_A_DEL_NS1_INFECTION_UP			BLANCO_MELO_COVID19_SARS_COV_2_INFECTION_CALU3_CELLS_UP	SANA_RESPONSE_TO_IFNG_UP	REACTOME_CYTOKINE_SIGNALING_IN_IMMUNE_SYSTEM	BROWNE_INTERFERON_RESPONSIVE_GENES
APOL6	BLANCO_MELO_HUMAN_PARAINFLUENZA_VIRUS_3_INFECTION_A594_CELLS_UP	BLANCO_MELO_RESPIRATORY_SYNCYTIAL_VIRUS_INFECTION_A594_CELLS_UP	BLANCO_MELO_BETA_INTERFERON_TREATED_BRONCHIAL_EPITHELIAL_CELLS_UP	BLANCO_MELO_BRONCHIAL_EPITHELIAL_CELLS_INFLUENZA_A_DEL_NS1_INFECTION_UP		BOSCO_INTERFERON_INDUCED_ANTIVIRAL_MODULE	BLANCO_MELO_COVID19_SARS_COV_2_INFECTION_CALU3_CELLS_UP
GBP3	BLANCO_MELO_HUMAN_PARAINFLUENZA_VIRUS_3_INFECTION_A594_CELLS_UP	BLANCO_MELO_RESPIRATORY_SYNCYTIAL_VIRUS_INFECTION_A594_CELLS_UP	BLANCO_MELO_BETA_INTERFERON_TREATED_BRONCHIAL_EPITHELIAL_CELLS_UP	BLANCO_MELO_BRONCHIAL_EPITHELIAL_CELLS_INFLUENZA_A_DEL_NS1_INFECTION_UP				SANA_RESPONSE_TO_IFNG_UP	REACTOME_CYTOKINE_SIGNALING_IN_IMMUNE_SYSTEM
ERAP2	BLANCO_MELO_HUMAN_PARAINFLUENZA_VIRUS_3_INFECTION_A594_CELLS_UP	BLANCO_MELO_RESPIRATORY_SYNCYTIAL_VIRUS_INFECTION_A594_CELLS_UP	BLANCO_MELO_BETA_INTERFERON_TREATED_BRONCHIAL_EPITHELIAL_CELLS_UP	BLANCO_MELO_BRONCHIAL_EPITHELIAL_CELLS_INFLUENZA_A_DEL_NS1_INFECTION_UP
TGM2	BLANCO_MELO_HUMAN_PARAINFLUENZA_VIRUS_3_INFECTION_A594_CELLS_UP	BLANCO_MELO_RESPIRATORY_SYNCYTIAL_VIRUS_INFECTION_A594_CELLS_UP	BLANCO_MELO_BETA_INTERFERON_TREATED_BRONCHIAL_EPITHELIAL_CELLS_UP	BLANCO_MELO_BRONCHIAL_EPITHELIAL_CELLS_INFLUENZA_A_DEL_NS1_INFECTION_UP
GBP5	BLANCO_MELO_HUMAN_PARAINFLUENZA_VIRUS_3_INFECTION_A594_CELLS_UP	BLANCO_MELO_RESPIRATORY_SYNCYTIAL_VIRUS_INFECTION_A594_CELLS_UP	BLANCO_MELO_BETA_INTERFERON_TREATED_BRONCHIAL_EPITHELIAL_CELLS_UP				BLANCO_MELO_COVID19_SARS_COV_2_INFECTION_CALU3_CELLS_UP		REACTOME_CYTOKINE_SIGNALING_IN_IMMUNE_SYSTEM
TLR3	BLANCO_MELO_HUMAN_PARAINFLUENZA_VIRUS_3_INFECTION_A594_CELLS_UP	BLANCO_MELO_RESPIRATORY_SYNCYTIAL_VIRUS_INFECTION_A594_CELLS_UP		BLANCO_MELO_BRONCHIAL_EPITHELIAL_CELLS_INFLUENZA_A_DEL_NS1_INFECTION_UP			BLANCO_MELO_COVID19_SARS_COV_2_INFECTION_CALU3_CELLS_UP			BROWNE_INTERFERON_RESPONSIVE_GENES
GBP4	BLANCO_MELO_HUMAN_PARAINFLUENZA_VIRUS_3_INFECTION_A594_CELLS_UP	BLANCO_MELO_RESPIRATORY_SYNCYTIAL_VIRUS_INFECTION_A594_CELLS_UP				BOSCO_INTERFERON_INDUCED_ANTIVIRAL_MODULE	BLANCO_MELO_COVID19_SARS_COV_2_INFECTION_CALU3_CELLS_UP	SANA_RESPONSE_TO_IFNG_UP	REACTOME_CYTOKINE_SIGNALING_IN_IMMUNE_SYSTEM
LAMP3	BLANCO_MELO_HUMAN_PARAINFLUENZA_VIRUS_3_INFECTION_A594_CELLS_UP	BLANCO_MELO_RESPIRATORY_SYNCYTIAL_VIRUS_INFECTION_A594_CELLS_UP			HECKER_IFNB1_TARGETS	BOSCO_INTERFERON_INDUCED_ANTIVIRAL_MODULE	BLANCO_MELO_COVID19_SARS_COV_2_INFECTION_CALU3_CELLS_UP
GBP1	BLANCO_MELO_HUMAN_PARAINFLUENZA_VIRUS_3_INFECTION_A594_CELLS_UP	BLANCO_MELO_RESPIRATORY_SYNCYTIAL_VIRUS_INFECTION_A594_CELLS_UP	BLANCO_MELO_BETA_INTERFERON_TREATED_BRONCHIAL_EPITHELIAL_CELLS_UP	BLANCO_MELO_BRONCHIAL_EPITHELIAL_CELLS_INFLUENZA_A_DEL_NS1_INFECTION_UP	HECKER_IFNB1_TARGETS		BLANCO_MELO_COVID19_SARS_COV_2_INFECTION_CALU3_CELLS_UP	SANA_RESPONSE_TO_IFNG_UP	REACTOME_CYTOKINE_SIGNALING_IN_IMMUNE_SYSTEM	BROWNE_INTERFERON_RESPONSIVE_GENES
DHX58	BLANCO_MELO_HUMAN_PARAINFLUENZA_VIRUS_3_INFECTION_A594_CELLS_UP	BLANCO_MELO_RESPIRATORY_SYNCYTIAL_VIRUS_INFECTION_A594_CELLS_UP	BLANCO_MELO_BETA_INTERFERON_TREATED_BRONCHIAL_EPITHELIAL_CELLS_UP	BLANCO_MELO_BRONCHIAL_EPITHELIAL_CELLS_INFLUENZA_A_DEL_NS1_INFECTION_UP	HECKER_IFNB1_TARGETS	BOSCO_INTERFERON_INDUCED_ANTIVIRAL_MODULE	BLANCO_MELO_COVID19_SARS_COV_2_INFECTION_CALU3_CELLS_UP
CD274	BLANCO_MELO_HUMAN_PARAINFLUENZA_VIRUS_3_INFECTION_A594_CELLS_UP	BLANCO_MELO_RESPIRATORY_SYNCYTIAL_VIRUS_INFECTION_A594_CELLS_UP	BLANCO_MELO_BETA_INTERFERON_TREATED_BRONCHIAL_EPITHELIAL_CELLS_UP			BOSCO_INTERFERON_INDUCED_ANTIVIRAL_MODULE	BLANCO_MELO_COVID19_SARS_COV_2_INFECTION_CALU3_CELLS_UP	SANA_RESPONSE_TO_IFNG_UP
CDCP1	BLANCO_MELO_HUMAN_PARAINFLUENZA_VIRUS_3_INFECTION_A594_CELLS_UP	BLANCO_MELO_RESPIRATORY_SYNCYTIAL_VIRUS_INFECTION_A594_CELLS_UP	BLANCO_MELO_BETA_INTERFERON_TREATED_BRONCHIAL_EPITHELIAL_CELLS_UP
IFI44L	BLANCO_MELO_HUMAN_PARAINFLUENZA_VIRUS_3_INFECTION_A594_CELLS_UP	BLANCO_MELO_RESPIRATORY_SYNCYTIAL_VIRUS_INFECTION_A594_CELLS_UP		BLANCO_MELO_BRONCHIAL_EPITHELIAL_CELLS_INFLUENZA_A_DEL_NS1_INFECTION_UP	HECKER_IFNB1_TARGETS	BOSCO_INTERFERON_INDUCED_ANTIVIRAL_MODULE	BLANCO_MELO_COVID19_SARS_COV_2_INFECTION_CALU3_CELLS_UP	SANA_RESPONSE_TO_IFNG_UP		BROWNE_INTERFERON_RESPONSIVE_GENES
IFIT5	BLANCO_MELO_HUMAN_PARAINFLUENZA_VIRUS_3_INFECTION_A594_CELLS_UP		BLANCO_MELO_BETA_INTERFERON_TREATED_BRONCHIAL_EPITHELIAL_CELLS_UP	BLANCO_MELO_BRONCHIAL_EPITHELIAL_CELLS_INFLUENZA_A_DEL_NS1_INFECTION_UP	HECKER_IFNB1_TARGETS	BOSCO_INTERFERON_INDUCED_ANTIVIRAL_MODULE	BLANCO_MELO_COVID19_SARS_COV_2_INFECTION_CALU3_CELLS_UP		REACTOME_CYTOKINE_SIGNALING_IN_IMMUNE_SYSTEM	BROWNE_INTERFERON_RESPONSIVE_GENES
OAS2	BLANCO_MELO_HUMAN_PARAINFLUENZA_VIRUS_3_INFECTION_A594_CELLS_UP			BLANCO_MELO_BRONCHIAL_EPITHELIAL_CELLS_INFLUENZA_A_DEL_NS1_INFECTION_UP	HECKER_IFNB1_TARGETS	BOSCO_INTERFERON_INDUCED_ANTIVIRAL_MODULE	BLANCO_MELO_COVID19_SARS_COV_2_INFECTION_CALU3_CELLS_UP	SANA_RESPONSE_TO_IFNG_UP	REACTOME_CYTOKINE_SIGNALING_IN_IMMUNE_SYSTEM	BROWNE_INTERFERON_RESPONSIVE_GENES
RUFY4	BLANCO_MELO_HUMAN_PARAINFLUENZA_VIRUS_3_INFECTION_A594_CELLS_UP
IL2RA									REACTOME_CYTOKINE_SIGNALING_IN_IMMUNE_SYSTEM
HIVEP3		BLANCO_MELO_RESPIRATORY_SYNCYTIAL_VIRUS_INFECTION_A594_CELLS_UP
SOCS3		BLANCO_MELO_RESPIRATORY_SYNCYTIAL_VIRUS_INFECTION_A594_CELLS_UP	BLANCO_MELO_BETA_INTERFERON_TREATED_BRONCHIAL_EPITHELIAL_CELLS_UP	BLANCO_MELO_BRONCHIAL_EPITHELIAL_CELLS_INFLUENZA_A_DEL_NS1_INFECTION_UP					REACTOME_CYTOKINE_SIGNALING_IN_IMMUNE_SYSTEM
TNFRSF10A		BLANCO_MELO_RESPIRATORY_SYNCYTIAL_VIRUS_INFECTION_A594_CELLS_UP	BLANCO_MELO_BETA_INTERFERON_TREATED_BRONCHIAL_EPITHELIAL_CELLS_UP
ZNF461				BLANCO_MELO_BRONCHIAL_EPITHELIAL_CELLS_INFLUENZA_A_DEL_NS1_INFECTION_UP
MYC									REACTOME_CYTOKINE_SIGNALING_IN_IMMUNE_SYSTEM
CUL1									REACTOME_CYTOKINE_SIGNALING_IN_IMMUNE_SYSTEM
MOV10						BOSCO_INTERFERON_INDUCED_ANTIVIRAL_MODULE
RORA									REACTOME_CYTOKINE_SIGNALING_IN_IMMUNE_SYSTEM
CAMK2D									REACTOME_CYTOKINE_SIGNALING_IN_IMMUNE_SYSTEM
PSMA8									REACTOME_CYTOKINE_SIGNALING_IN_IMMUNE_SYSTEM
TMEM229B			BLANCO_MELO_BETA_INTERFERON_TREATED_BRONCHIAL_EPITHELIAL_CELLS_UP	BLANCO_MELO_BRONCHIAL_EPITHELIAL_CELLS_INFLUENZA_A_DEL_NS1_INFECTION_UP
BCL2									REACTOME_CYTOKINE_SIGNALING_IN_IMMUNE_SYSTEM
GIMAP7								SANA_RESPONSE_TO_IFNG_UP
GBP6									REACTOME_CYTOKINE_SIGNALING_IN_IMMUNE_SYSTEM
IL21R		BLANCO_MELO_RESPIRATORY_SYNCYTIAL_VIRUS_INFECTION_A594_CELLS_UP							REACTOME_CYTOKINE_SIGNALING_IN_IMMUNE_SYSTEM
AIM2			BLANCO_MELO_BETA_INTERFERON_TREATED_BRONCHIAL_EPITHELIAL_CELLS_UP	BLANCO_MELO_BRONCHIAL_EPITHELIAL_CELLS_INFLUENZA_A_DEL_NS1_INFECTION_UP
NCOA7			BLANCO_MELO_BETA_INTERFERON_TREATED_BRONCHIAL_EPITHELIAL_CELLS_UP	BLANCO_MELO_BRONCHIAL_EPITHELIAL_CELLS_INFLUENZA_A_DEL_NS1_INFECTION_UP		BOSCO_INTERFERON_INDUCED_ANTIVIRAL_MODULE	BLANCO_MELO_COVID19_SARS_COV_2_INFECTION_CALU3_CELLS_UP
CASP7			BLANCO_MELO_BETA_INTERFERON_TREATED_BRONCHIAL_EPITHELIAL_CELLS_UP	BLANCO_MELO_BRONCHIAL_EPITHELIAL_CELLS_INFLUENZA_A_DEL_NS1_INFECTION_UP
ADAMTS6			BLANCO_MELO_BETA_INTERFERON_TREATED_BRONCHIAL_EPITHELIAL_CELLS_UP				BLANCO_MELO_COVID19_SARS_COV_2_INFECTION_CALU3_CELLS_UP
BMPR2			BLANCO_MELO_BETA_INTERFERON_TREATED_BRONCHIAL_EPITHELIAL_CELLS_UP
FZD5				BLANCO_MELO_BRONCHIAL_EPITHELIAL_CELLS_INFLUENZA_A_DEL_NS1_INFECTION_UP
PLEKHA7				BLANCO_MELO_BRONCHIAL_EPITHELIAL_CELLS_INFLUENZA_A_DEL_NS1_INFECTION_UP
CARD17				BLANCO_MELO_BRONCHIAL_EPITHELIAL_CELLS_INFLUENZA_A_DEL_NS1_INFECTION_UP
S1PR1									REACTOME_CYTOKINE_SIGNALING_IN_IMMUNE_SYSTEM
KPNA5									REACTOME_CYTOKINE_SIGNALING_IN_IMMUNE_SYSTEM
RHOU									REACTOME_CYTOKINE_SIGNALING_IN_IMMUNE_SYSTEM
ATP10A			BLANCO_MELO_BETA_INTERFERON_TREATED_BRONCHIAL_EPITHELIAL_CELLS_UP	BLANCO_MELO_BRONCHIAL_EPITHELIAL_CELLS_INFLUENZA_A_DEL_NS1_INFECTION_UP
AXL			BLANCO_MELO_BETA_INTERFERON_TREATED_BRONCHIAL_EPITHELIAL_CELLS_UP
GCH1				BLANCO_MELO_BRONCHIAL_EPITHELIAL_CELLS_INFLUENZA_A_DEL_NS1_INFECTION_UP		BOSCO_INTERFERON_INDUCED_ANTIVIRAL_MODULE				BROWNE_INTERFERON_RESPONSIVE_GENES
ENC1				BLANCO_MELO_BRONCHIAL_EPITHELIAL_CELLS_INFLUENZA_A_DEL_NS1_INFECTION_UP
HDX				BLANCO_MELO_BRONCHIAL_EPITHELIAL_CELLS_INFLUENZA_A_DEL_NS1_INFECTION_UP			BLANCO_MELO_COVID19_SARS_COV_2_INFECTION_CALU3_CELLS_UP
CLUHP3				BLANCO_MELO_BRONCHIAL_EPITHELIAL_CELLS_INFLUENZA_A_DEL_NS1_INFECTION_UP
C1QB					HECKER_IFNB1_TARGETS
NUP205									REACTOME_CYTOKINE_SIGNALING_IN_IMMUNE_SYSTEM
HAVCR2									REACTOME_CYTOKINE_SIGNALING_IN_IMMUNE_SYSTEM
C1QC					HECKER_IFNB1_TARGETS
C1QA					HECKER_IFNB1_TARGETS
SDC3						BOSCO_INTERFERON_INDUCED_ANTIVIRAL_MODULE
USP30-AS1							BLANCO_MELO_COVID19_SARS_COV_2_INFECTION_CALU3_CELLS_UP
GBP1P1							BLANCO_MELO_COVID19_SARS_COV_2_INFECTION_CALU3_CELLS_UP
FLNB									REACTOME_CYTOKINE_SIGNALING_IN_IMMUNE_SYSTEM
IL31RA									REACTOME_CYTOKINE_SIGNALING_IN_IMMUNE_SYSTEM
CCR2									REACTOME_CYTOKINE_SIGNALING_IN_IMMUNE_SYSTEM
TNFRSF25									REACTOME_CYTOKINE_SIGNALING_IN_IMMUNE_SYSTEM
EDAR									REACTOME_CYTOKINE_SIGNALING_IN_IMMUNE_SYSTEM
IL17RE									REACTOME_CYTOKINE_SIGNALING_IN_IMMUNE_SYSTEM
KIF5C										BROWNE_INTERFERON_RESPONSIVE_GENES

## Sheet: GSEA-C5
Gene Set Name	# Genes in Gene Set (K)	Description	# Genes in Overlap (k)	k/K	p-value	FDR q-value
GOMF_DNA_BINDING_TRANSCRIPTION_FACTOR_ACTIVITY	1430	A transcription regulator activity that modulates transcription of gene sets via selective and non-covalent binding to a specific double-stranded genomic DNA sequence (sometimes referred to as a motif) within a cis-regulatory region. Regulatory regions include promoters (proximal and distal) and enhancers. Genes are transcriptional units, and include bacterial operons. [GOC:txnOH-2018]	59	0.0413	6.88e-20	1.03e-15
GOMF_TRANSCRIPTION_REGULATOR_ACTIVITY	1909	A molecular function that controls the rate, timing and/or magnitude of gene transcription. The function of transcriptional regulators is to modulate gene expression at the transcription step so that they are expressed in the right cell at the right time and in the right amount throughout the life of the cell and the organism. Genes are transcriptional units, and include bacterial operons. [GOC:p…	67	0.0351	7.77e-19	5.83e-15
GOMF_SEQUENCE_SPECIFIC_DNA_BINDING	1672	Interacting selectively and non-covalently with DNA of a specific nucleotide composition, e.g. GC-rich DNA binding, or with a specific sequence motif or type of DNA e.g. promotor binding or rDNA binding. [GOC:jl]	60	0.0359	2.37e-17	1.19e-13
GOMF_CIS_REGULATORY_REGION_SEQUENCE_SPECIFIC_DNA_BINDING	1219	Interacting selectively and non-covalently with a specific upstream regulatory DNA sequence (transcription factor recognition sequence or binding site) located in cis relative to the transcription start site (i.e., on the same strand of DNA) of a gene transcribed by some RNA polymerase. The proximal promoter is in cis with and relatively close to the core promoter. [GOC:txnOH-2018]	50	0.041	7.55e-17	2.83e-13
GOBP_DEFENSE_RESPONSE	1790	Reactions, triggered in response to the presence of a foreign body or the occurrence of an injury, which result in restriction of damage to the organism attacked or prevention/recovery from the infection caused by the attack. [GOC:go_curators]	54	0.0302	1.17e-12	3.52e-09
GOBP_REGULATION_OF_IMMUNE_SYSTEM_PROCESS	1593	Any process that modulates the frequency, rate, or extent of an immune system process. [GOC:add]	50	0.0314	2.11e-12	5.27e-09
GOBP_RESPONSE_TO_CYTOKINE	1188	Any process that results in a change in state or activity of a cell or an organism (in terms of movement, secretion, enzyme production, gene expression, etc.) as a result of a cytokine stimulus. [GOC:sl]	41	0.0345	1.34e-11	2.73e-08
GOBP_IMMUNE_SYSTEM_DEVELOPMENT	989	The process whose specific outcome is the progression of an organismal system whose objective is to provide calibrated responses by an organism to a potential internal or invasive threat, over time, from its formation to the mature structure. A system is a regularly interacting or interdependent group of organs or tissues that work together to carry out a given biological process. [GOC:add, GOC:d…	37	0.0374	1.46e-11	2.73e-08
GOBP_DEFENSE_RESPONSE_TO_OTHER_ORGANISM	1208	Reactions triggered in response to the presence of another organism that act to protect the cell or organism from damage caused by that organism. [GOC:dos]	39	0.0323	3.01e-10	5.01e-07
GOBP_RESPONSE_TO_BIOTIC_STIMULUS	1606	Any process that results in a change in state or activity of a cell or an organism (in terms of movement, secretion, enzyme production, gene expression, etc.) as a result of a biotic stimulus, a stimulus caused or produced by a living organism. [GOC:hb]	46	0.0286	3.45e-10	5.18e-07
GOBP_POSITIVE_REGULATION_OF_IMMUNE_SYSTEM_PROCESS	1050	Any process that activates or increases the frequency, rate, or extent of an immune system process. [GOC:add]	35	0.0333	1.13e-09	1.54e-06
GOBP_LEUKOCYTE_DIFFERENTIATION	525	The process in which a relatively unspecialized hemopoietic precursor cell acquires the specialized features of a leukocyte. A leukocyte is an achromatic cell of the myeloid or lymphoid lineages capable of ameboid movement, found in blood or other tissue. [CL:0000738, GOC:add, PMID:16551264]	24	0.0457	1.34e-09	1.67e-06
GOBP_DEFENSE_RESPONSE_TO_VIRUS	260	Reactions triggered in response to the presence of a virus that act to protect the cell or organism. [GOC:ai]	17	0.0654	1.89e-09	2.18e-06
GOBP_CYTOKINE_MEDIATED_SIGNALING_PATHWAY	803	A series of molecular signals initiated by the binding of a cytokine to a receptor on the surface of a cell, and ending with regulation of a downstream cellular process, e.g. transcription. [GOC:mah, GOC:signaling, PMID:19295629]	29	0.0361	5.54e-09	5.93e-06
GOMF_RIBONUCLEOTIDE_BINDING	1898	Interacting selectively and non-covalently with a ribonucleotide, any compound consisting of a ribonucleoside that is esterified with (ortho)phosphate or an oligophosphate at any hydroxyl group on the ribose moiety. [GOC:mah]	48	0.0253	7.7e-09	7.7e-06
GOBP_REGULATION_OF_RESPONSE_TO_EXTERNAL_STIMULUS	1036	Any process that modulates the frequency, rate or extent of a response to an external stimulus. [GOC:mah]	33	0.0319	1.03e-08	9.68e-06
GOCC_NUCLEOLUS	1386	A small, dense body one or more of which are present in the nucleus of eukaryotic cells. It is rich in RNA and protein, is not bounded by a limiting membrane, and is not seen during mitosis. Its prime function is the transcription of the nucleolar DNA into 45S ribosomal-precursor RNA, the processing of this RNA into 5.8S, 18S, and 28S components of ribosomal RNA, and the association of these comp…	39	0.0281	1.35e-08	1.19e-05
GOBP_POSITIVE_REGULATION_OF_RESPONSE_TO_EXTERNAL_STIMULUS	507	Any process that activates, maintains or increases the rate of a response to an external stimulus. [GOC:mah]	22	0.0434	1.67e-08	1.39e-05
GOBP_APOPTOTIC_PROCESS	1931	A programmed cell death process which begins when a cell receives an internal (e.g. DNA damage) or external signal (e.g. an extracellular death ligand), and proceeds through a series of biochemical events (signaling pathway phase) which trigger an execution phase. The execution phase is the last step of an apoptotic process, and is typically characterized by rounding-up of the cell, retraction of…	47	0.0243	3.56e-08	2.81e-05
GOBP_REGULATION_OF_CELL_ACTIVATION	626	Any process that modulates the frequency, rate or extent of cell activation, the change in the morphology or behavior of a cell resulting from exposure to an activating factor such as a cellular or soluble ligand. [GOC:ai]	24	0.0383	3.91e-08	2.93e-05

## Sheet: GSEA-C7
Gene Set Name	# Genes in Gene Set (K)	Description	# Genes in Overlap (k)	k/K	p-value	FDR q-value
OSMAN_BLOOD_CHAD63_KH_AGE_18_50YO_HIGH_DOSE_SUBJECTS_24HR_DN	1886	Genes down-regulated in blood 24hr vs 0hr in adults (18-50) (high dose subjects) after exposure to ChAd63-KH , time point 24H , administered Intramuscular injection. Comment: DE gene list for high dose subjects.	106	0.0562	1.84e-48	9.58e-45
HOWARD_MONOCYTE_INACT_MONOV_INFLUENZA_A_INDONESIA_05_2005_H5N1_AGE_18_49YO_1DY_UP	231	Genes up-regulated in monocyte 1d vs 0d in adults (18-49) after exposure to inactivated monovalent influenza A/Indonesia/05/2005 H5N1 split-virus vaccine , time point 1D , administered i.m.	35	0.1515	2.36e-30	6.16e-27
HOWARD_NEUTROPHIL_INACT_MONOV_INFLUENZA_A_INDONESIA_05_2005_H5N1_AGE_18_49YO_3DY_UP	119	Genes up-regulated in neutrophil 3d vs 0d in adults (18-49) after exposure to inactivated monovalent influenza A/Indonesia/05/2005 H5N1 split-virus vaccine , time point 3D , administered i.m.	28	0.2353	3.69e-30	6.43e-27
HOWARD_NEUTROPHIL_INACT_MONOV_INFLUENZA_A_INDONESIA_05_2005_H5N1_AGE_18_49YO_1DY_UP	394	Genes up-regulated in neutrophil 1d vs 0d in adults (18-49) after exposure to inactivated monovalent influenza A/Indonesia/05/2005 H5N1 split-virus vaccine , time point 1D , administered i.m.	40	0.1015	1.2e-27	1.56e-24
HOWARD_PBMC_INACT_MONOV_INFLUENZA_A_INDONESIA_05_2005_H5N1_AGE_19_39YO_AS03_ADJUVANT_VS_BUFFER_1DY_UP	377	Genes up-regulated in peripheral blood mononuclear cell vaccinated with AS03 adjuvant vs phosphate-bufferred saline in adults (19-39) after exposure to inactivated monovalent influenza A/Indonesia/05/2005 H5N1 split-virus vaccine , time point 1D , administered i.m.	39	0.1034	2.75e-27	2.87e-24
HOWARD_DENDRITIC_CELL_INACT_MONOV_INFLUENZA_A_INDONESIA_05_2005_H5N1_AGE_18_49YO_1DY_UP	159	Genes up-regulated in dendritic cell 1d vs 0d in adults (18-49) after exposure to inactivated monovalent influenza A/Indonesia/05/2005 H5N1 split-virus vaccine , time point 1D , administered i.m.	28	0.1761	2.16e-26	1.88e-23
HARALAMBIEVA_PBMC_M_M_R_II_AGE_11_22YO_VACCINATED_VS_UNVACCINATED_7YR_UP	973	Genes up-regulated in peripheral blood mononuclear cell vaccinated vs unvaccinated in adolescent/young adults (11-22) after exposure to M-M-R II , time point 7Y	53	0.0545	2.91e-23	2.17e-20
FRANCO_BLOOD_SANOFI_PASTEUR_SA_INACTIVATED_INFLUENZA_VACCINE_CORRELATED_WITH_ANTIBODY_RESPONSE_AGE_18_40YO_1DY_POSITIVE	129	Genes positively correlated with antibody response in blood in adults (18-40) after exposure to Sanofi Pasteur, SA, Inactivated influenza vaccine , time point 1D	23	0.1783	4.99e-22	3.25e-19
GSE13485_DAY1_VS_DAY7_YF17D_VACCINE_PBMC_DN	198	Genes down-regulated in comparison of unstimulated peripheral blood mononuclear cells (PBMC) 1 day after stimulation with YF17D vaccine versus PBMC 7 days after the stimulation.	26	0.1313	3.28e-21	1.9e-18
GAUCHER_PBMC_YF_VAX_STAMARIL_UNKNOWN_AGE_7DY_UP	292	Genes up-regulated in peripheral blood mononuclear cell 7d vs 0d in unknown after exposure to YF-Vax/Stamaril , time point 7D	30	0.1027	3.76e-21	1.96e-18
GSE13485_CTRL_VS_DAY7_YF17D_VACCINE_PBMC_DN	200	Genes down-regulated in comparison of unstimulated peripheral blood mononuclear cells (PBMC) versus PBMC 7 days after stimulation with YF17D vaccine.	26	0.13	4.25e-21	2.02e-18
ZAK_PBMC_MRKAD5_HIV_1_GAG_POL_NEF_AGE_20_50YO_1DY_DN	1010	Genes down-regulated in peripheral blood mononuclear cell 1d vs 0d in adults (20-50) after exposure to MRKAd5 HIV-1 gag/pol/nef , time point 1D. Comment: Table includes specific cell types	51	0.0505	5.7e-21	2.48e-18
ZAK_PBMC_MRKAD5_HIV_1_GAG_POL_NEF_AGE_20_50YO_1DY_UP	1012	Genes up-regulated in peripheral blood mononuclear cell 1d vs 0d in adults (20-50) after exposure to MRKAd5 HIV-1 gag/pol/nef , time point 1D. Comment: Table includes specific cell types	51	0.0504	6.21e-21	2.49e-18
OSMAN_BLOOD_CHAD63_KH_AGE_18_50YO_HIGH_DOSE_SUBJECTS_24HR_UP	1992	Genes up-regulated in blood 24hr vs 0hr in adults (18-50) (high dose subjects) after exposure to ChAd63-KH , time point 24H , administered Intramuscular injection. Comment: DE gene list for high dose subjects.	69	0.0346	4.32e-19	1.61e-16
GAUCHER_PBMC_YF_VAX_STAMARIL_UNKNOWN_AGE_10DY_UP	196	Genes up-regulated in peripheral blood mononuclear cell 10d vs 0d in unknown after exposure to YF-Vax/Stamaril , time point 10D	24	0.1224	5.95e-19	2.07e-16
GSE22886_NAIVE_CD4_TCELL_VS_MONOCYTE_UP	197	Genes up-regulated in comparison of naive CD4 [GeneID=920] T cells versus day 0 monocytes.	24	0.1218	6.71e-19	2.19e-16
ERWIN_COHEN_BLOOD_TC_83_AGE_23_48YO_VACCINATED_VS_CONTROL_2DY_UP	119	Genes up-regulated in blood vaccinated vs control in adults (23-48) after exposure to Live attenuated vaccine TC-83 , time point 2D	20	0.1681	8.64e-19	2.65e-16
GSE33424_CD161_INT_VS_NEG_CD8_TCELL_UP	200	Genes up-regulated in CD8 T cells: KLRB1 int [GeneID=3820] versus KLRB1- [GeneID=3820].	24	0.12	9.6e-19	2.78e-16
GSE42724_NAIVE_BCELL_VS_PLASMABLAST_UP	197	Genes up-regulated in B lymphocytes: naÔve versus plasmablasts.	23	0.1168	9.54e-18	2.62e-15
GSE18791_CTRL_VS_NEWCASTLE_VIRUS_DC_8H_DN	196	Genes down-regulated in comparison of control conventional dendritic cells (cDC) at 0 h versus cDCs infected with Newcastle disease virus (NDV) at 8 h.	22	0.1122	1.16e-16	3.01e-14
Gene Symbol	OSMAN_BLOOD_CHAD63_KH_AGE_18_50YO_HIGH_DOSE_SUBJECTS_24HR_DN	HOWARD_MONOCYTE_INACT_MONOV_INFLUENZA_A_INDONESIA_05_2005_H5N1_AGE_18_49YO_1DY_UP	HOWARD_NEUTROPHIL_INACT_MONOV_INFLUENZA_A_INDONESIA_05_2005_H5N1_AGE_18_49YO_3DY_UP	HOWARD_NEUTROPHIL_INACT_MONOV_INFLUENZA_A_INDONESIA_05_2005_H5N1_AGE_18_49YO_1DY_UP	HOWARD_PBMC_INACT_MONOV_INFLUENZA_A_INDONESIA_05_2005_H5N1_AGE_19_39YO_AS03_ADJUVANT_VS_BUFFER_1DY_UP	HOWARD_DENDRITIC_CELL_INACT_MONOV_INFLUENZA_A_INDONESIA_05_2005_H5N1_AGE_18_49YO_1DY_UP	HARALAMBIEVA_PBMC_M_M_R_II_AGE_11_22YO_VACCINATED_VS_UNVACCINATED_7YR_UP	FRANCO_BLOOD_SANOFI_PASTEUR_SA_INACTIVATED_INFLUENZA_VACCINE_CORRELATED_WITH_ANTIBODY_RESPONSE_AGE_18_40YO_1DY_POSITIVE	GSE13485_DAY1_VS_DAY7_YF17D_VACCINE_PBMC_DN	GAUCHER_PBMC_YF_VAX_STAMARIL_UNKNOWN_AGE_7DY_UP	GSE13485_CTRL_VS_DAY7_YF17D_VACCINE_PBMC_DN	ZAK_PBMC_MRKAD5_HIV_1_GAG_POL_NEF_AGE_20_50YO_1DY_DN	ZAK_PBMC_MRKAD5_HIV_1_GAG_POL_NEF_AGE_20_50YO_1DY_UP	OSMAN_BLOOD_CHAD63_KH_AGE_18_50YO_HIGH_DOSE_SUBJECTS_24HR_UP	GAUCHER_PBMC_YF_VAX_STAMARIL_UNKNOWN_AGE_10DY_UP	ERWIN_COHEN_BLOOD_TC_83_AGE_23_48YO_VACCINATED_VS_CONTROL_2DY_UP	GSE18791_CTRL_VS_NEWCASTLE_VIRUS_DC_8H_DN
FILIP1L	OSMAN_BLOOD_CHAD63_KH_AGE_18_50YO_HIGH_DOSE_SUBJECTS_24HR_DN	HOWARD_MONOCYTE_INACT_MONOV_INFLUENZA_A_INDONESIA_05_2005_H5N1_AGE_18_49YO_1DY_UP
PLCXD2	OSMAN_BLOOD_CHAD63_KH_AGE_18_50YO_HIGH_DOSE_SUBJECTS_24HR_DN					HOWARD_DENDRITIC_CELL_INACT_MONOV_INFLUENZA_A_INDONESIA_05_2005_H5N1_AGE_18_49YO_1DY_UP
RORA	OSMAN_BLOOD_CHAD63_KH_AGE_18_50YO_HIGH_DOSE_SUBJECTS_24HR_DN											ZAK_PBMC_MRKAD5_HIV_1_GAG_POL_NEF_AGE_20_50YO_1DY_DN
ITK	OSMAN_BLOOD_CHAD63_KH_AGE_18_50YO_HIGH_DOSE_SUBJECTS_24HR_DN											ZAK_PBMC_MRKAD5_HIV_1_GAG_POL_NEF_AGE_20_50YO_1DY_DN
CD28	OSMAN_BLOOD_CHAD63_KH_AGE_18_50YO_HIGH_DOSE_SUBJECTS_24HR_DN											ZAK_PBMC_MRKAD5_HIV_1_GAG_POL_NEF_AGE_20_50YO_1DY_DN
TXK	OSMAN_BLOOD_CHAD63_KH_AGE_18_50YO_HIGH_DOSE_SUBJECTS_24HR_DN											ZAK_PBMC_MRKAD5_HIV_1_GAG_POL_NEF_AGE_20_50YO_1DY_DN
NELL2	OSMAN_BLOOD_CHAD63_KH_AGE_18_50YO_HIGH_DOSE_SUBJECTS_24HR_DN											ZAK_PBMC_MRKAD5_HIV_1_GAG_POL_NEF_AGE_20_50YO_1DY_DN
BCL2	OSMAN_BLOOD_CHAD63_KH_AGE_18_50YO_HIGH_DOSE_SUBJECTS_24HR_DN											ZAK_PBMC_MRKAD5_HIV_1_GAG_POL_NEF_AGE_20_50YO_1DY_DN
S1PR1	OSMAN_BLOOD_CHAD63_KH_AGE_18_50YO_HIGH_DOSE_SUBJECTS_24HR_DN											ZAK_PBMC_MRKAD5_HIV_1_GAG_POL_NEF_AGE_20_50YO_1DY_DN
INPP4B	OSMAN_BLOOD_CHAD63_KH_AGE_18_50YO_HIGH_DOSE_SUBJECTS_24HR_DN											ZAK_PBMC_MRKAD5_HIV_1_GAG_POL_NEF_AGE_20_50YO_1DY_DN
TESPA1	OSMAN_BLOOD_CHAD63_KH_AGE_18_50YO_HIGH_DOSE_SUBJECTS_24HR_DN											ZAK_PBMC_MRKAD5_HIV_1_GAG_POL_NEF_AGE_20_50YO_1DY_DN
CAMK4	OSMAN_BLOOD_CHAD63_KH_AGE_18_50YO_HIGH_DOSE_SUBJECTS_24HR_DN											ZAK_PBMC_MRKAD5_HIV_1_GAG_POL_NEF_AGE_20_50YO_1DY_DN
SLC16A10	OSMAN_BLOOD_CHAD63_KH_AGE_18_50YO_HIGH_DOSE_SUBJECTS_24HR_DN											ZAK_PBMC_MRKAD5_HIV_1_GAG_POL_NEF_AGE_20_50YO_1DY_DN
CHMP7	OSMAN_BLOOD_CHAD63_KH_AGE_18_50YO_HIGH_DOSE_SUBJECTS_24HR_DN											ZAK_PBMC_MRKAD5_HIV_1_GAG_POL_NEF_AGE_20_50YO_1DY_DN
NR3C2	OSMAN_BLOOD_CHAD63_KH_AGE_18_50YO_HIGH_DOSE_SUBJECTS_24HR_DN											ZAK_PBMC_MRKAD5_HIV_1_GAG_POL_NEF_AGE_20_50YO_1DY_DN
TOX	OSMAN_BLOOD_CHAD63_KH_AGE_18_50YO_HIGH_DOSE_SUBJECTS_24HR_DN											ZAK_PBMC_MRKAD5_HIV_1_GAG_POL_NEF_AGE_20_50YO_1DY_DN
ABCB1	OSMAN_BLOOD_CHAD63_KH_AGE_18_50YO_HIGH_DOSE_SUBJECTS_24HR_DN											ZAK_PBMC_MRKAD5_HIV_1_GAG_POL_NEF_AGE_20_50YO_1DY_DN
HPCAL4	OSMAN_BLOOD_CHAD63_KH_AGE_18_50YO_HIGH_DOSE_SUBJECTS_24HR_DN											ZAK_PBMC_MRKAD5_HIV_1_GAG_POL_NEF_AGE_20_50YO_1DY_DN					GSE18791_CTRL_VS_NEWCASTLE_VIRUS_DC_8H_DN
TKTL1	OSMAN_BLOOD_CHAD63_KH_AGE_18_50YO_HIGH_DOSE_SUBJECTS_24HR_DN											ZAK_PBMC_MRKAD5_HIV_1_GAG_POL_NEF_AGE_20_50YO_1DY_DN
DYRK2	OSMAN_BLOOD_CHAD63_KH_AGE_18_50YO_HIGH_DOSE_SUBJECTS_24HR_DN											ZAK_PBMC_MRKAD5_HIV_1_GAG_POL_NEF_AGE_20_50YO_1DY_DN
TCF7	OSMAN_BLOOD_CHAD63_KH_AGE_18_50YO_HIGH_DOSE_SUBJECTS_24HR_DN											ZAK_PBMC_MRKAD5_HIV_1_GAG_POL_NEF_AGE_20_50YO_1DY_DN
RCAN3	OSMAN_BLOOD_CHAD63_KH_AGE_18_50YO_HIGH_DOSE_SUBJECTS_24HR_DN											ZAK_PBMC_MRKAD5_HIV_1_GAG_POL_NEF_AGE_20_50YO_1DY_DN
TRABD2A	OSMAN_BLOOD_CHAD63_KH_AGE_18_50YO_HIGH_DOSE_SUBJECTS_24HR_DN											ZAK_PBMC_MRKAD5_HIV_1_GAG_POL_NEF_AGE_20_50YO_1DY_DN
FLNB	OSMAN_BLOOD_CHAD63_KH_AGE_18_50YO_HIGH_DOSE_SUBJECTS_24HR_DN											ZAK_PBMC_MRKAD5_HIV_1_GAG_POL_NEF_AGE_20_50YO_1DY_DN
ZNF43	OSMAN_BLOOD_CHAD63_KH_AGE_18_50YO_HIGH_DOSE_SUBJECTS_24HR_DN											ZAK_PBMC_MRKAD5_HIV_1_GAG_POL_NEF_AGE_20_50YO_1DY_DN
NR1D2	OSMAN_BLOOD_CHAD63_KH_AGE_18_50YO_HIGH_DOSE_SUBJECTS_24HR_DN											ZAK_PBMC_MRKAD5_HIV_1_GAG_POL_NEF_AGE_20_50YO_1DY_DN
SLC16A7	OSMAN_BLOOD_CHAD63_KH_AGE_18_50YO_HIGH_DOSE_SUBJECTS_24HR_DN											ZAK_PBMC_MRKAD5_HIV_1_GAG_POL_NEF_AGE_20_50YO_1DY_DN
ANKRD36B	OSMAN_BLOOD_CHAD63_KH_AGE_18_50YO_HIGH_DOSE_SUBJECTS_24HR_DN											ZAK_PBMC_MRKAD5_HIV_1_GAG_POL_NEF_AGE_20_50YO_1DY_DN
ANKRD36C	OSMAN_BLOOD_CHAD63_KH_AGE_18_50YO_HIGH_DOSE_SUBJECTS_24HR_DN											ZAK_PBMC_MRKAD5_HIV_1_GAG_POL_NEF_AGE_20_50YO_1DY_DN
RNF157	OSMAN_BLOOD_CHAD63_KH_AGE_18_50YO_HIGH_DOSE_SUBJECTS_24HR_DN											ZAK_PBMC_MRKAD5_HIV_1_GAG_POL_NEF_AGE_20_50YO_1DY_DN
MPHOSPH9	OSMAN_BLOOD_CHAD63_KH_AGE_18_50YO_HIGH_DOSE_SUBJECTS_24HR_DN											ZAK_PBMC_MRKAD5_HIV_1_GAG_POL_NEF_AGE_20_50YO_1DY_DN
TCEA3	OSMAN_BLOOD_CHAD63_KH_AGE_18_50YO_HIGH_DOSE_SUBJECTS_24HR_DN											ZAK_PBMC_MRKAD5_HIV_1_GAG_POL_NEF_AGE_20_50YO_1DY_DN
SFMBT1	OSMAN_BLOOD_CHAD63_KH_AGE_18_50YO_HIGH_DOSE_SUBJECTS_24HR_DN											ZAK_PBMC_MRKAD5_HIV_1_GAG_POL_NEF_AGE_20_50YO_1DY_DN
LAX1	OSMAN_BLOOD_CHAD63_KH_AGE_18_50YO_HIGH_DOSE_SUBJECTS_24HR_DN											ZAK_PBMC_MRKAD5_HIV_1_GAG_POL_NEF_AGE_20_50YO_1DY_DN
RNF125	OSMAN_BLOOD_CHAD63_KH_AGE_18_50YO_HIGH_DOSE_SUBJECTS_24HR_DN											ZAK_PBMC_MRKAD5_HIV_1_GAG_POL_NEF_AGE_20_50YO_1DY_DN
CASD1	OSMAN_BLOOD_CHAD63_KH_AGE_18_50YO_HIGH_DOSE_SUBJECTS_24HR_DN											ZAK_PBMC_MRKAD5_HIV_1_GAG_POL_NEF_AGE_20_50YO_1DY_DN
RFX7	OSMAN_BLOOD_CHAD63_KH_AGE_18_50YO_HIGH_DOSE_SUBJECTS_24HR_DN											ZAK_PBMC_MRKAD5_HIV_1_GAG_POL_NEF_AGE_20_50YO_1DY_DN
SACS	OSMAN_BLOOD_CHAD63_KH_AGE_18_50YO_HIGH_DOSE_SUBJECTS_24HR_DN											ZAK_PBMC_MRKAD5_HIV_1_GAG_POL_NEF_AGE_20_50YO_1DY_DN
ABCD2	OSMAN_BLOOD_CHAD63_KH_AGE_18_50YO_HIGH_DOSE_SUBJECTS_24HR_DN											ZAK_PBMC_MRKAD5_HIV_1_GAG_POL_NEF_AGE_20_50YO_1DY_DN
ZDBF2	OSMAN_BLOOD_CHAD63_KH_AGE_18_50YO_HIGH_DOSE_SUBJECTS_24HR_DN											ZAK_PBMC_MRKAD5_HIV_1_GAG_POL_NEF_AGE_20_50YO_1DY_DN
SLC41A1	OSMAN_BLOOD_CHAD63_KH_AGE_18_50YO_HIGH_DOSE_SUBJECTS_24HR_DN											ZAK_PBMC_MRKAD5_HIV_1_GAG_POL_NEF_AGE_20_50YO_1DY_DN
LINC00920	OSMAN_BLOOD_CHAD63_KH_AGE_18_50YO_HIGH_DOSE_SUBJECTS_24HR_DN											ZAK_PBMC_MRKAD5_HIV_1_GAG_POL_NEF_AGE_20_50YO_1DY_DN
MLLT3	OSMAN_BLOOD_CHAD63_KH_AGE_18_50YO_HIGH_DOSE_SUBJECTS_24HR_DN
TBC1D4	OSMAN_BLOOD_CHAD63_KH_AGE_18_50YO_HIGH_DOSE_SUBJECTS_24HR_DN
ICOS	OSMAN_BLOOD_CHAD63_KH_AGE_18_50YO_HIGH_DOSE_SUBJECTS_24HR_DN
PDE4D	OSMAN_BLOOD_CHAD63_KH_AGE_18_50YO_HIGH_DOSE_SUBJECTS_24HR_DN
GPRASP1	OSMAN_BLOOD_CHAD63_KH_AGE_18_50YO_HIGH_DOSE_SUBJECTS_24HR_DN
PASK	OSMAN_BLOOD_CHAD63_KH_AGE_18_50YO_HIGH_DOSE_SUBJECTS_24HR_DN
KIF5C	OSMAN_BLOOD_CHAD63_KH_AGE_18_50YO_HIGH_DOSE_SUBJECTS_24HR_DN
ZNF551	OSMAN_BLOOD_CHAD63_KH_AGE_18_50YO_HIGH_DOSE_SUBJECTS_24HR_DN
N6AMT1	OSMAN_BLOOD_CHAD63_KH_AGE_18_50YO_HIGH_DOSE_SUBJECTS_24HR_DN
MYC	OSMAN_BLOOD_CHAD63_KH_AGE_18_50YO_HIGH_DOSE_SUBJECTS_24HR_DN
EDAR	OSMAN_BLOOD_CHAD63_KH_AGE_18_50YO_HIGH_DOSE_SUBJECTS_24HR_DN
RNF157-AS1	OSMAN_BLOOD_CHAD63_KH_AGE_18_50YO_HIGH_DOSE_SUBJECTS_24HR_DN
TTC28	OSMAN_BLOOD_CHAD63_KH_AGE_18_50YO_HIGH_DOSE_SUBJECTS_24HR_DN
TMEM245	OSMAN_BLOOD_CHAD63_KH_AGE_18_50YO_HIGH_DOSE_SUBJECTS_24HR_DN
USP44	OSMAN_BLOOD_CHAD63_KH_AGE_18_50YO_HIGH_DOSE_SUBJECTS_24HR_DN
ZNF510	OSMAN_BLOOD_CHAD63_KH_AGE_18_50YO_HIGH_DOSE_SUBJECTS_24HR_DN
LMO7	OSMAN_BLOOD_CHAD63_KH_AGE_18_50YO_HIGH_DOSE_SUBJECTS_24HR_DN
JMY	OSMAN_BLOOD_CHAD63_KH_AGE_18_50YO_HIGH_DOSE_SUBJECTS_24HR_DN
FAM153A	OSMAN_BLOOD_CHAD63_KH_AGE_18_50YO_HIGH_DOSE_SUBJECTS_24HR_DN
ARL14EP	OSMAN_BLOOD_CHAD63_KH_AGE_18_50YO_HIGH_DOSE_SUBJECTS_24HR_DN
SLC35G1	OSMAN_BLOOD_CHAD63_KH_AGE_18_50YO_HIGH_DOSE_SUBJECTS_24HR_DN
PHF10	OSMAN_BLOOD_CHAD63_KH_AGE_18_50YO_HIGH_DOSE_SUBJECTS_24HR_DN
ZNF566	OSMAN_BLOOD_CHAD63_KH_AGE_18_50YO_HIGH_DOSE_SUBJECTS_24HR_DN
EML5	OSMAN_BLOOD_CHAD63_KH_AGE_18_50YO_HIGH_DOSE_SUBJECTS_24HR_DN
C12orf65	OSMAN_BLOOD_CHAD63_KH_AGE_18_50YO_HIGH_DOSE_SUBJECTS_24HR_DN
GOLGA2P5	OSMAN_BLOOD_CHAD63_KH_AGE_18_50YO_HIGH_DOSE_SUBJECTS_24HR_DN
ZNF823	OSMAN_BLOOD_CHAD63_KH_AGE_18_50YO_HIGH_DOSE_SUBJECTS_24HR_DN
HOOK1	OSMAN_BLOOD_CHAD63_KH_AGE_18_50YO_HIGH_DOSE_SUBJECTS_24HR_DN
GDF11	OSMAN_BLOOD_CHAD63_KH_AGE_18_50YO_HIGH_DOSE_SUBJECTS_24HR_DN
CCDC141	OSMAN_BLOOD_CHAD63_KH_AGE_18_50YO_HIGH_DOSE_SUBJECTS_24HR_DN
TET1	OSMAN_BLOOD_CHAD63_KH_AGE_18_50YO_HIGH_DOSE_SUBJECTS_24HR_DN
GTPBP8	OSMAN_BLOOD_CHAD63_KH_AGE_18_50YO_HIGH_DOSE_SUBJECTS_24HR_DN
HAVCR1	OSMAN_BLOOD_CHAD63_KH_AGE_18_50YO_HIGH_DOSE_SUBJECTS_24HR_DN
MIR17HG	OSMAN_BLOOD_CHAD63_KH_AGE_18_50YO_HIGH_DOSE_SUBJECTS_24HR_DN
GPRIN3	OSMAN_BLOOD_CHAD63_KH_AGE_18_50YO_HIGH_DOSE_SUBJECTS_24HR_DN
SYDE2	OSMAN_BLOOD_CHAD63_KH_AGE_18_50YO_HIGH_DOSE_SUBJECTS_24HR_DN
SEMA4F	OSMAN_BLOOD_CHAD63_KH_AGE_18_50YO_HIGH_DOSE_SUBJECTS_24HR_DN
MYO9A	OSMAN_BLOOD_CHAD63_KH_AGE_18_50YO_HIGH_DOSE_SUBJECTS_24HR_DN
ZNF416	OSMAN_BLOOD_CHAD63_KH_AGE_18_50YO_HIGH_DOSE_SUBJECTS_24HR_DN
KLF8	OSMAN_BLOOD_CHAD63_KH_AGE_18_50YO_HIGH_DOSE_SUBJECTS_24HR_DN
KRT73	OSMAN_BLOOD_CHAD63_KH_AGE_18_50YO_HIGH_DOSE_SUBJECTS_24HR_DN
LIPT2	OSMAN_BLOOD_CHAD63_KH_AGE_18_50YO_HIGH_DOSE_SUBJECTS_24HR_DN
CEP70	OSMAN_BLOOD_CHAD63_KH_AGE_18_50YO_HIGH_DOSE_SUBJECTS_24HR_DN
ZNF256	OSMAN_BLOOD_CHAD63_KH_AGE_18_50YO_HIGH_DOSE_SUBJECTS_24HR_DN
ZNF304	OSMAN_BLOOD_CHAD63_KH_AGE_18_50YO_HIGH_DOSE_SUBJECTS_24HR_DN
ZNF354C	OSMAN_BLOOD_CHAD63_KH_AGE_18_50YO_HIGH_DOSE_SUBJECTS_24HR_DN
ZNF483	OSMAN_BLOOD_CHAD63_KH_AGE_18_50YO_HIGH_DOSE_SUBJECTS_24HR_DN
FZD3	OSMAN_BLOOD_CHAD63_KH_AGE_18_50YO_HIGH_DOSE_SUBJECTS_24HR_DN
ABCA6	OSMAN_BLOOD_CHAD63_KH_AGE_18_50YO_HIGH_DOSE_SUBJECTS_24HR_DN
CDHR3	OSMAN_BLOOD_CHAD63_KH_AGE_18_50YO_HIGH_DOSE_SUBJECTS_24HR_DN
RTL6	OSMAN_BLOOD_CHAD63_KH_AGE_18_50YO_HIGH_DOSE_SUBJECTS_24HR_DN
ZNF649	OSMAN_BLOOD_CHAD63_KH_AGE_18_50YO_HIGH_DOSE_SUBJECTS_24HR_DN
LZTS2	OSMAN_BLOOD_CHAD63_KH_AGE_18_50YO_HIGH_DOSE_SUBJECTS_24HR_DN
ZNF599	OSMAN_BLOOD_CHAD63_KH_AGE_18_50YO_HIGH_DOSE_SUBJECTS_24HR_DN
LINC00476	OSMAN_BLOOD_CHAD63_KH_AGE_18_50YO_HIGH_DOSE_SUBJECTS_24HR_DN
ZNF530	OSMAN_BLOOD_CHAD63_KH_AGE_18_50YO_HIGH_DOSE_SUBJECTS_24HR_DN
ZNF781	OSMAN_BLOOD_CHAD63_KH_AGE_18_50YO_HIGH_DOSE_SUBJECTS_24HR_DN
SDR42E1	OSMAN_BLOOD_CHAD63_KH_AGE_18_50YO_HIGH_DOSE_SUBJECTS_24HR_DN
ZNF461	OSMAN_BLOOD_CHAD63_KH_AGE_18_50YO_HIGH_DOSE_SUBJECTS_24HR_DN
ZNF829	OSMAN_BLOOD_CHAD63_KH_AGE_18_50YO_HIGH_DOSE_SUBJECTS_24HR_DN
NBPF3	OSMAN_BLOOD_CHAD63_KH_AGE_18_50YO_HIGH_DOSE_SUBJECTS_24HR_DN
ANTXRLP1	OSMAN_BLOOD_CHAD63_KH_AGE_18_50YO_HIGH_DOSE_SUBJECTS_24HR_DN
ANKRD20A5P	OSMAN_BLOOD_CHAD63_KH_AGE_18_50YO_HIGH_DOSE_SUBJECTS_24HR_DN
ZNF286B	OSMAN_BLOOD_CHAD63_KH_AGE_18_50YO_HIGH_DOSE_SUBJECTS_24HR_DN
IFI44L		HOWARD_MONOCYTE_INACT_MONOV_INFLUENZA_A_INDONESIA_05_2005_H5N1_AGE_18_49YO_1DY_UP	HOWARD_NEUTROPHIL_INACT_MONOV_INFLUENZA_A_INDONESIA_05_2005_H5N1_AGE_18_49YO_3DY_UP	HOWARD_NEUTROPHIL_INACT_MONOV_INFLUENZA_A_INDONESIA_05_2005_H5N1_AGE_18_49YO_1DY_UP	HOWARD_PBMC_INACT_MONOV_INFLUENZA_A_INDONESIA_05_2005_H5N1_AGE_19_39YO_AS03_ADJUVANT_VS_BUFFER_1DY_UP	HOWARD_DENDRITIC_CELL_INACT_MONOV_INFLUENZA_A_INDONESIA_05_2005_H5N1_AGE_18_49YO_1DY_UP	HARALAMBIEVA_PBMC_M_M_R_II_AGE_11_22YO_VACCINATED_VS_UNVACCINATED_7YR_UP	FRANCO_BLOOD_SANOFI_PASTEUR_SA_INACTIVATED_INFLUENZA_VACCINE_CORRELATED_WITH_ANTIBODY_RESPONSE_AGE_18_40YO_1DY_POSITIVE	GSE13485_DAY1_VS_DAY7_YF17D_VACCINE_PBMC_DN	GAUCHER_PBMC_YF_VAX_STAMARIL_UNKNOWN_AGE_7DY_UP	GSE13485_CTRL_VS_DAY7_YF17D_VACCINE_PBMC_DN		ZAK_PBMC_MRKAD5_HIV_1_GAG_POL_NEF_AGE_20_50YO_1DY_UP	OSMAN_BLOOD_CHAD63_KH_AGE_18_50YO_HIGH_DOSE_SUBJECTS_24HR_UP	GAUCHER_PBMC_YF_VAX_STAMARIL_UNKNOWN_AGE_10DY_UP	ERWIN_COHEN_BLOOD_TC_83_AGE_23_48YO_VACCINATED_VS_CONTROL_2DY_UP	GSE18791_CTRL_VS_NEWCASTLE_VIRUS_DC_8H_DN
XAF1		HOWARD_MONOCYTE_INACT_MONOV_INFLUENZA_A_INDONESIA_05_2005_H5N1_AGE_18_49YO_1DY_UP	HOWARD_NEUTROPHIL_INACT_MONOV_INFLUENZA_A_INDONESIA_05_2005_H5N1_AGE_18_49YO_3DY_UP	HOWARD_NEUTROPHIL_INACT_MONOV_INFLUENZA_A_INDONESIA_05_2005_H5N1_AGE_18_49YO_1DY_UP	HOWARD_PBMC_INACT_MONOV_INFLUENZA_A_INDONESIA_05_2005_H5N1_AGE_19_39YO_AS03_ADJUVANT_VS_BUFFER_1DY_UP	HOWARD_DENDRITIC_CELL_INACT_MONOV_INFLUENZA_A_INDONESIA_05_2005_H5N1_AGE_18_49YO_1DY_UP	HARALAMBIEVA_PBMC_M_M_R_II_AGE_11_22YO_VACCINATED_VS_UNVACCINATED_7YR_UP	FRANCO_BLOOD_SANOFI_PASTEUR_SA_INACTIVATED_INFLUENZA_VACCINE_CORRELATED_WITH_ANTIBODY_RESPONSE_AGE_18_40YO_1DY_POSITIVE	GSE13485_DAY1_VS_DAY7_YF17D_VACCINE_PBMC_DN	GAUCHER_PBMC_YF_VAX_STAMARIL_UNKNOWN_AGE_7DY_UP	GSE13485_CTRL_VS_DAY7_YF17D_VACCINE_PBMC_DN		ZAK_PBMC_MRKAD5_HIV_1_GAG_POL_NEF_AGE_20_50YO_1DY_UP	OSMAN_BLOOD_CHAD63_KH_AGE_18_50YO_HIGH_DOSE_SUBJECTS_24HR_UP	GAUCHER_PBMC_YF_VAX_STAMARIL_UNKNOWN_AGE_10DY_UP	ERWIN_COHEN_BLOOD_TC_83_AGE_23_48YO_VACCINATED_VS_CONTROL_2DY_UP	GSE18791_CTRL_VS_NEWCASTLE_VIRUS_DC_8H_DN
LAP3		HOWARD_MONOCYTE_INACT_MONOV_INFLUENZA_A_INDONESIA_05_2005_H5N1_AGE_18_49YO_1DY_UP	HOWARD_NEUTROPHIL_INACT_MONOV_INFLUENZA_A_INDONESIA_05_2005_H5N1_AGE_18_49YO_3DY_UP	HOWARD_NEUTROPHIL_INACT_MONOV_INFLUENZA_A_INDONESIA_05_2005_H5N1_AGE_18_49YO_1DY_UP	HOWARD_PBMC_INACT_MONOV_INFLUENZA_A_INDONESIA_05_2005_H5N1_AGE_19_39YO_AS03_ADJUVANT_VS_BUFFER_1DY_UP	HOWARD_DENDRITIC_CELL_INACT_MONOV_INFLUENZA_A_INDONESIA_05_2005_H5N1_AGE_18_49YO_1DY_UP	HARALAMBIEVA_PBMC_M_M_R_II_AGE_11_22YO_VACCINATED_VS_UNVACCINATED_7YR_UP	FRANCO_BLOOD_SANOFI_PASTEUR_SA_INACTIVATED_INFLUENZA_VACCINE_CORRELATED_WITH_ANTIBODY_RESPONSE_AGE_18_40YO_1DY_POSITIVE	GSE13485_DAY1_VS_DAY7_YF17D_VACCINE_PBMC_DN	GAUCHER_PBMC_YF_VAX_STAMARIL_UNKNOWN_AGE_7DY_UP	GSE13485_CTRL_VS_DAY7_YF17D_VACCINE_PBMC_DN		ZAK_PBMC_MRKAD5_HIV_1_GAG_POL_NEF_AGE_20_50YO_1DY_UP	OSMAN_BLOOD_CHAD63_KH_AGE_18_50YO_HIGH_DOSE_SUBJECTS_24HR_UP	GAUCHER_PBMC_YF_VAX_STAMARIL_UNKNOWN_AGE_10DY_UP	ERWIN_COHEN_BLOOD_TC_83_AGE_23_48YO_VACCINATED_VS_CONTROL_2DY_UP
GBP1		HOWARD_MONOCYTE_INACT_MONOV_INFLUENZA_A_INDONESIA_05_2005_H5N1_AGE_18_49YO_1DY_UP	HOWARD_NEUTROPHIL_INACT_MONOV_INFLUENZA_A_INDONESIA_05_2005_H5N1_AGE_18_49YO_3DY_UP	HOWARD_NEUTROPHIL_INACT_MONOV_INFLUENZA_A_INDONESIA_05_2005_H5N1_AGE_18_49YO_1DY_UP	HOWARD_PBMC_INACT_MONOV_INFLUENZA_A_INDONESIA_05_2005_H5N1_AGE_19_39YO_AS03_ADJUVANT_VS_BUFFER_1DY_UP	HOWARD_DENDRITIC_CELL_INACT_MONOV_INFLUENZA_A_INDONESIA_05_2005_H5N1_AGE_18_49YO_1DY_UP	HARALAMBIEVA_PBMC_M_M_R_II_AGE_11_22YO_VACCINATED_VS_UNVACCINATED_7YR_UP	FRANCO_BLOOD_SANOFI_PASTEUR_SA_INACTIVATED_INFLUENZA_VACCINE_CORRELATED_WITH_ANTIBODY_RESPONSE_AGE_18_40YO_1DY_POSITIVE	GSE13485_DAY1_VS_DAY7_YF17D_VACCINE_PBMC_DN	GAUCHER_PBMC_YF_VAX_STAMARIL_UNKNOWN_AGE_7DY_UP	GSE13485_CTRL_VS_DAY7_YF17D_VACCINE_PBMC_DN		ZAK_PBMC_MRKAD5_HIV_1_GAG_POL_NEF_AGE_20_50YO_1DY_UP	OSMAN_BLOOD_CHAD63_KH_AGE_18_50YO_HIGH_DOSE_SUBJECTS_24HR_UP	GAUCHER_PBMC_YF_VAX_STAMARIL_UNKNOWN_AGE_10DY_UP	ERWIN_COHEN_BLOOD_TC_83_AGE_23_48YO_VACCINATED_VS_CONTROL_2DY_UP	GSE18791_CTRL_VS_NEWCASTLE_VIRUS_DC_8H_DN
AIM2		HOWARD_MONOCYTE_INACT_MONOV_INFLUENZA_A_INDONESIA_05_2005_H5N1_AGE_18_49YO_1DY_UP	HOWARD_NEUTROPHIL_INACT_MONOV_INFLUENZA_A_INDONESIA_05_2005_H5N1_AGE_18_49YO_3DY_UP	HOWARD_NEUTROPHIL_INACT_MONOV_INFLUENZA_A_INDONESIA_05_2005_H5N1_AGE_18_49YO_1DY_UP	HOWARD_PBMC_INACT_MONOV_INFLUENZA_A_INDONESIA_05_2005_H5N1_AGE_19_39YO_AS03_ADJUVANT_VS_BUFFER_1DY_UP	HOWARD_DENDRITIC_CELL_INACT_MONOV_INFLUENZA_A_INDONESIA_05_2005_H5N1_AGE_18_49YO_1DY_UP	HARALAMBIEVA_PBMC_M_M_R_II_AGE_11_22YO_VACCINATED_VS_UNVACCINATED_7YR_UP	FRANCO_BLOOD_SANOFI_PASTEUR_SA_INACTIVATED_INFLUENZA_VACCINE_CORRELATED_WITH_ANTIBODY_RESPONSE_AGE_18_40YO_1DY_POSITIVE	GSE13485_DAY1_VS_DAY7_YF17D_VACCINE_PBMC_DN	GAUCHER_PBMC_YF_VAX_STAMARIL_UNKNOWN_AGE_7DY_UP	GSE13485_CTRL_VS_DAY7_YF17D_VACCINE_PBMC_DN		ZAK_PBMC_MRKAD5_HIV_1_GAG_POL_NEF_AGE_20_50YO_1DY_UP	OSMAN_BLOOD_CHAD63_KH_AGE_18_50YO_HIGH_DOSE_SUBJECTS_24HR_UP	GAUCHER_PBMC_YF_VAX_STAMARIL_UNKNOWN_AGE_10DY_UP		GSE18791_CTRL_VS_NEWCASTLE_VIRUS_DC_8H_DN
GBP4		HOWARD_MONOCYTE_INACT_MONOV_INFLUENZA_A_INDONESIA_05_2005_H5N1_AGE_18_49YO_1DY_UP	HOWARD_NEUTROPHIL_INACT_MONOV_INFLUENZA_A_INDONESIA_05_2005_H5N1_AGE_18_49YO_3DY_UP	HOWARD_NEUTROPHIL_INACT_MONOV_INFLUENZA_A_INDONESIA_05_2005_H5N1_AGE_18_49YO_1DY_UP	HOWARD_PBMC_INACT_MONOV_INFLUENZA_A_INDONESIA_05_2005_H5N1_AGE_19_39YO_AS03_ADJUVANT_VS_BUFFER_1DY_UP	HOWARD_DENDRITIC_CELL_INACT_MONOV_INFLUENZA_A_INDONESIA_05_2005_H5N1_AGE_18_49YO_1DY_UP	HARALAMBIEVA_PBMC_M_M_R_II_AGE_11_22YO_VACCINATED_VS_UNVACCINATED_7YR_UP	FRANCO_BLOOD_SANOFI_PASTEUR_SA_INACTIVATED_INFLUENZA_VACCINE_CORRELATED_WITH_ANTIBODY_RESPONSE_AGE_18_40YO_1DY_POSITIVE	GSE13485_DAY1_VS_DAY7_YF17D_VACCINE_PBMC_DN	GAUCHER_PBMC_YF_VAX_STAMARIL_UNKNOWN_AGE_7DY_UP	GSE13485_CTRL_VS_DAY7_YF17D_VACCINE_PBMC_DN		ZAK_PBMC_MRKAD5_HIV_1_GAG_POL_NEF_AGE_20_50YO_1DY_UP	OSMAN_BLOOD_CHAD63_KH_AGE_18_50YO_HIGH_DOSE_SUBJECTS_24HR_UP		ERWIN_COHEN_BLOOD_TC_83_AGE_23_48YO_VACCINATED_VS_CONTROL_2DY_UP	GSE18791_CTRL_VS_NEWCASTLE_VIRUS_DC_8H_DN
BATF2		HOWARD_MONOCYTE_INACT_MONOV_INFLUENZA_A_INDONESIA_05_2005_H5N1_AGE_18_49YO_1DY_UP	HOWARD_NEUTROPHIL_INACT_MONOV_INFLUENZA_A_INDONESIA_05_2005_H5N1_AGE_18_49YO_3DY_UP	HOWARD_NEUTROPHIL_INACT_MONOV_INFLUENZA_A_INDONESIA_05_2005_H5N1_AGE_18_49YO_1DY_UP	HOWARD_PBMC_INACT_MONOV_INFLUENZA_A_INDONESIA_05_2005_H5N1_AGE_19_39YO_AS03_ADJUVANT_VS_BUFFER_1DY_UP	HOWARD_DENDRITIC_CELL_INACT_MONOV_INFLUENZA_A_INDONESIA_05_2005_H5N1_AGE_18_49YO_1DY_UP	HARALAMBIEVA_PBMC_M_M_R_II_AGE_11_22YO_VACCINATED_VS_UNVACCINATED_7YR_UP	FRANCO_BLOOD_SANOFI_PASTEUR_SA_INACTIVATED_INFLUENZA_VACCINE_CORRELATED_WITH_ANTIBODY_RESPONSE_AGE_18_40YO_1DY_POSITIVE		GAUCHER_PBMC_YF_VAX_STAMARIL_UNKNOWN_AGE_7DY_UP	GSE13485_CTRL_VS_DAY7_YF17D_VACCINE_PBMC_DN		ZAK_PBMC_MRKAD5_HIV_1_GAG_POL_NEF_AGE_20_50YO_1DY_UP	OSMAN_BLOOD_CHAD63_KH_AGE_18_50YO_HIGH_DOSE_SUBJECTS_24HR_UP	GAUCHER_PBMC_YF_VAX_STAMARIL_UNKNOWN_AGE_10DY_UP	ERWIN_COHEN_BLOOD_TC_83_AGE_23_48YO_VACCINATED_VS_CONTROL_2DY_UP	GSE18791_CTRL_VS_NEWCASTLE_VIRUS_DC_8H_DN
GBP5		HOWARD_MONOCYTE_INACT_MONOV_INFLUENZA_A_INDONESIA_05_2005_H5N1_AGE_18_49YO_1DY_UP	HOWARD_NEUTROPHIL_INACT_MONOV_INFLUENZA_A_INDONESIA_05_2005_H5N1_AGE_18_49YO_3DY_UP	HOWARD_NEUTROPHIL_INACT_MONOV_INFLUENZA_A_INDONESIA_05_2005_H5N1_AGE_18_49YO_1DY_UP	HOWARD_PBMC_INACT_MONOV_INFLUENZA_A_INDONESIA_05_2005_H5N1_AGE_19_39YO_AS03_ADJUVANT_VS_BUFFER_1DY_UP	HOWARD_DENDRITIC_CELL_INACT_MONOV_INFLUENZA_A_INDONESIA_05_2005_H5N1_AGE_18_49YO_1DY_UP	HARALAMBIEVA_PBMC_M_M_R_II_AGE_11_22YO_VACCINATED_VS_UNVACCINATED_7YR_UP	FRANCO_BLOOD_SANOFI_PASTEUR_SA_INACTIVATED_INFLUENZA_VACCINE_CORRELATED_WITH_ANTIBODY_RESPONSE_AGE_18_40YO_1DY_POSITIVE		GAUCHER_PBMC_YF_VAX_STAMARIL_UNKNOWN_AGE_7DY_UP			ZAK_PBMC_MRKAD5_HIV_1_GAG_POL_NEF_AGE_20_50YO_1DY_UP	OSMAN_BLOOD_CHAD63_KH_AGE_18_50YO_HIGH_DOSE_SUBJECTS_24HR_UP	GAUCHER_PBMC_YF_VAX_STAMARIL_UNKNOWN_AGE_10DY_UP	ERWIN_COHEN_BLOOD_TC_83_AGE_23_48YO_VACCINATED_VS_CONTROL_2DY_UP	GSE18791_CTRL_VS_NEWCASTLE_VIRUS_DC_8H_DN
APOL3		HOWARD_MONOCYTE_INACT_MONOV_INFLUENZA_A_INDONESIA_05_2005_H5N1_AGE_18_49YO_1DY_UP	HOWARD_NEUTROPHIL_INACT_MONOV_INFLUENZA_A_INDONESIA_05_2005_H5N1_AGE_18_49YO_3DY_UP	HOWARD_NEUTROPHIL_INACT_MONOV_INFLUENZA_A_INDONESIA_05_2005_H5N1_AGE_18_49YO_1DY_UP	HOWARD_PBMC_INACT_MONOV_INFLUENZA_A_INDONESIA_05_2005_H5N1_AGE_19_39YO_AS03_ADJUVANT_VS_BUFFER_1DY_UP	HOWARD_DENDRITIC_CELL_INACT_MONOV_INFLUENZA_A_INDONESIA_05_2005_H5N1_AGE_18_49YO_1DY_UP	HARALAMBIEVA_PBMC_M_M_R_II_AGE_11_22YO_VACCINATED_VS_UNVACCINATED_7YR_UP	FRANCO_BLOOD_SANOFI_PASTEUR_SA_INACTIVATED_INFLUENZA_VACCINE_CORRELATED_WITH_ANTIBODY_RESPONSE_AGE_18_40YO_1DY_POSITIVE		GAUCHER_PBMC_YF_VAX_STAMARIL_UNKNOWN_AGE_7DY_UP			ZAK_PBMC_MRKAD5_HIV_1_GAG_POL_NEF_AGE_20_50YO_1DY_UP	OSMAN_BLOOD_CHAD63_KH_AGE_18_50YO_HIGH_DOSE_SUBJECTS_24HR_UP	GAUCHER_PBMC_YF_VAX_STAMARIL_UNKNOWN_AGE_10DY_UP
GBP3		HOWARD_MONOCYTE_INACT_MONOV_INFLUENZA_A_INDONESIA_05_2005_H5N1_AGE_18_49YO_1DY_UP	HOWARD_NEUTROPHIL_INACT_MONOV_INFLUENZA_A_INDONESIA_05_2005_H5N1_AGE_18_49YO_3DY_UP	HOWARD_NEUTROPHIL_INACT_MONOV_INFLUENZA_A_INDONESIA_05_2005_H5N1_AGE_18_49YO_1DY_UP	HOWARD_PBMC_INACT_MONOV_INFLUENZA_A_INDONESIA_05_2005_H5N1_AGE_19_39YO_AS03_ADJUVANT_VS_BUFFER_1DY_UP	HOWARD_DENDRITIC_CELL_INACT_MONOV_INFLUENZA_A_INDONESIA_05_2005_H5N1_AGE_18_49YO_1DY_UP	HARALAMBIEVA_PBMC_M_M_R_II_AGE_11_22YO_VACCINATED_VS_UNVACCINATED_7YR_UP		GSE13485_DAY1_VS_DAY7_YF17D_VACCINE_PBMC_DN		GSE13485_CTRL_VS_DAY7_YF17D_VACCINE_PBMC_DN		ZAK_PBMC_MRKAD5_HIV_1_GAG_POL_NEF_AGE_20_50YO_1DY_UP	OSMAN_BLOOD_CHAD63_KH_AGE_18_50YO_HIGH_DOSE_SUBJECTS_24HR_UP
CD274		HOWARD_MONOCYTE_INACT_MONOV_INFLUENZA_A_INDONESIA_05_2005_H5N1_AGE_18_49YO_1DY_UP	HOWARD_NEUTROPHIL_INACT_MONOV_INFLUENZA_A_INDONESIA_05_2005_H5N1_AGE_18_49YO_3DY_UP	HOWARD_NEUTROPHIL_INACT_MONOV_INFLUENZA_A_INDONESIA_05_2005_H5N1_AGE_18_49YO_1DY_UP	HOWARD_PBMC_INACT_MONOV_INFLUENZA_A_INDONESIA_05_2005_H5N1_AGE_19_39YO_AS03_ADJUVANT_VS_BUFFER_1DY_UP	HOWARD_DENDRITIC_CELL_INACT_MONOV_INFLUENZA_A_INDONESIA_05_2005_H5N1_AGE_18_49YO_1DY_UP	HARALAMBIEVA_PBMC_M_M_R_II_AGE_11_22YO_VACCINATED_VS_UNVACCINATED_7YR_UP						ZAK_PBMC_MRKAD5_HIV_1_GAG_POL_NEF_AGE_20_50YO_1DY_UP	OSMAN_BLOOD_CHAD63_KH_AGE_18_50YO_HIGH_DOSE_SUBJECTS_24HR_UP		ERWIN_COHEN_BLOOD_TC_83_AGE_23_48YO_VACCINATED_VS_CONTROL_2DY_UP	GSE18791_CTRL_VS_NEWCASTLE_VIRUS_DC_8H_DN
OAS2		HOWARD_MONOCYTE_INACT_MONOV_INFLUENZA_A_INDONESIA_05_2005_H5N1_AGE_18_49YO_1DY_UP	HOWARD_NEUTROPHIL_INACT_MONOV_INFLUENZA_A_INDONESIA_05_2005_H5N1_AGE_18_49YO_3DY_UP	HOWARD_NEUTROPHIL_INACT_MONOV_INFLUENZA_A_INDONESIA_05_2005_H5N1_AGE_18_49YO_1DY_UP	HOWARD_PBMC_INACT_MONOV_INFLUENZA_A_INDONESIA_05_2005_H5N1_AGE_19_39YO_AS03_ADJUVANT_VS_BUFFER_1DY_UP		HARALAMBIEVA_PBMC_M_M_R_II_AGE_11_22YO_VACCINATED_VS_UNVACCINATED_7YR_UP	FRANCO_BLOOD_SANOFI_PASTEUR_SA_INACTIVATED_INFLUENZA_VACCINE_CORRELATED_WITH_ANTIBODY_RESPONSE_AGE_18_40YO_1DY_POSITIVE	GSE13485_DAY1_VS_DAY7_YF17D_VACCINE_PBMC_DN	GAUCHER_PBMC_YF_VAX_STAMARIL_UNKNOWN_AGE_7DY_UP	GSE13485_CTRL_VS_DAY7_YF17D_VACCINE_PBMC_DN		ZAK_PBMC_MRKAD5_HIV_1_GAG_POL_NEF_AGE_20_50YO_1DY_UP	OSMAN_BLOOD_CHAD63_KH_AGE_18_50YO_HIGH_DOSE_SUBJECTS_24HR_UP	GAUCHER_PBMC_YF_VAX_STAMARIL_UNKNOWN_AGE_10DY_UP	ERWIN_COHEN_BLOOD_TC_83_AGE_23_48YO_VACCINATED_VS_CONTROL_2DY_UP	GSE18791_CTRL_VS_NEWCASTLE_VIRUS_DC_8H_DN
GCH1		HOWARD_MONOCYTE_INACT_MONOV_INFLUENZA_A_INDONESIA_05_2005_H5N1_AGE_18_49YO_1DY_UP	HOWARD_NEUTROPHIL_INACT_MONOV_INFLUENZA_A_INDONESIA_05_2005_H5N1_AGE_18_49YO_3DY_UP	HOWARD_NEUTROPHIL_INACT_MONOV_INFLUENZA_A_INDONESIA_05_2005_H5N1_AGE_18_49YO_1DY_UP	HOWARD_PBMC_INACT_MONOV_INFLUENZA_A_INDONESIA_05_2005_H5N1_AGE_19_39YO_AS03_ADJUVANT_VS_BUFFER_1DY_UP		HARALAMBIEVA_PBMC_M_M_R_II_AGE_11_22YO_VACCINATED_VS_UNVACCINATED_7YR_UP	FRANCO_BLOOD_SANOFI_PASTEUR_SA_INACTIVATED_INFLUENZA_VACCINE_CORRELATED_WITH_ANTIBODY_RESPONSE_AGE_18_40YO_1DY_POSITIVE	GSE13485_DAY1_VS_DAY7_YF17D_VACCINE_PBMC_DN	GAUCHER_PBMC_YF_VAX_STAMARIL_UNKNOWN_AGE_7DY_UP	GSE13485_CTRL_VS_DAY7_YF17D_VACCINE_PBMC_DN		ZAK_PBMC_MRKAD5_HIV_1_GAG_POL_NEF_AGE_20_50YO_1DY_UP	OSMAN_BLOOD_CHAD63_KH_AGE_18_50YO_HIGH_DOSE_SUBJECTS_24HR_UP	GAUCHER_PBMC_YF_VAX_STAMARIL_UNKNOWN_AGE_10DY_UP	ERWIN_COHEN_BLOOD_TC_83_AGE_23_48YO_VACCINATED_VS_CONTROL_2DY_UP	GSE18791_CTRL_VS_NEWCASTLE_VIRUS_DC_8H_DN
RTP4		HOWARD_MONOCYTE_INACT_MONOV_INFLUENZA_A_INDONESIA_05_2005_H5N1_AGE_18_49YO_1DY_UP	HOWARD_NEUTROPHIL_INACT_MONOV_INFLUENZA_A_INDONESIA_05_2005_H5N1_AGE_18_49YO_3DY_UP	HOWARD_NEUTROPHIL_INACT_MONOV_INFLUENZA_A_INDONESIA_05_2005_H5N1_AGE_18_49YO_1DY_UP	HOWARD_PBMC_INACT_MONOV_INFLUENZA_A_INDONESIA_05_2005_H5N1_AGE_19_39YO_AS03_ADJUVANT_VS_BUFFER_1DY_UP		HARALAMBIEVA_PBMC_M_M_R_II_AGE_11_22YO_VACCINATED_VS_UNVACCINATED_7YR_UP		GSE13485_DAY1_VS_DAY7_YF17D_VACCINE_PBMC_DN	GAUCHER_PBMC_YF_VAX_STAMARIL_UNKNOWN_AGE_7DY_UP	GSE13485_CTRL_VS_DAY7_YF17D_VACCINE_PBMC_DN		ZAK_PBMC_MRKAD5_HIV_1_GAG_POL_NEF_AGE_20_50YO_1DY_UP	OSMAN_BLOOD_CHAD63_KH_AGE_18_50YO_HIGH_DOSE_SUBJECTS_24HR_UP	GAUCHER_PBMC_YF_VAX_STAMARIL_UNKNOWN_AGE_10DY_UP	ERWIN_COHEN_BLOOD_TC_83_AGE_23_48YO_VACCINATED_VS_CONTROL_2DY_UP	GSE18791_CTRL_VS_NEWCASTLE_VIRUS_DC_8H_DN
CARD17		HOWARD_MONOCYTE_INACT_MONOV_INFLUENZA_A_INDONESIA_05_2005_H5N1_AGE_18_49YO_1DY_UP	HOWARD_NEUTROPHIL_INACT_MONOV_INFLUENZA_A_INDONESIA_05_2005_H5N1_AGE_18_49YO_3DY_UP	HOWARD_NEUTROPHIL_INACT_MONOV_INFLUENZA_A_INDONESIA_05_2005_H5N1_AGE_18_49YO_1DY_UP	HOWARD_PBMC_INACT_MONOV_INFLUENZA_A_INDONESIA_05_2005_H5N1_AGE_19_39YO_AS03_ADJUVANT_VS_BUFFER_1DY_UP		HARALAMBIEVA_PBMC_M_M_R_II_AGE_11_22YO_VACCINATED_VS_UNVACCINATED_7YR_UP							OSMAN_BLOOD_CHAD63_KH_AGE_18_50YO_HIGH_DOSE_SUBJECTS_24HR_UP
IFIT5		HOWARD_MONOCYTE_INACT_MONOV_INFLUENZA_A_INDONESIA_05_2005_H5N1_AGE_18_49YO_1DY_UP	HOWARD_NEUTROPHIL_INACT_MONOV_INFLUENZA_A_INDONESIA_05_2005_H5N1_AGE_18_49YO_3DY_UP	HOWARD_NEUTROPHIL_INACT_MONOV_INFLUENZA_A_INDONESIA_05_2005_H5N1_AGE_18_49YO_1DY_UP			HARALAMBIEVA_PBMC_M_M_R_II_AGE_11_22YO_VACCINATED_VS_UNVACCINATED_7YR_UP		GSE13485_DAY1_VS_DAY7_YF17D_VACCINE_PBMC_DN	GAUCHER_PBMC_YF_VAX_STAMARIL_UNKNOWN_AGE_7DY_UP	GSE13485_CTRL_VS_DAY7_YF17D_VACCINE_PBMC_DN		ZAK_PBMC_MRKAD5_HIV_1_GAG_POL_NEF_AGE_20_50YO_1DY_UP	OSMAN_BLOOD_CHAD63_KH_AGE_18_50YO_HIGH_DOSE_SUBJECTS_24HR_UP	GAUCHER_PBMC_YF_VAX_STAMARIL_UNKNOWN_AGE_10DY_UP	ERWIN_COHEN_BLOOD_TC_83_AGE_23_48YO_VACCINATED_VS_CONTROL_2DY_UP	GSE18791_CTRL_VS_NEWCASTLE_VIRUS_DC_8H_DN
APOL6		HOWARD_MONOCYTE_INACT_MONOV_INFLUENZA_A_INDONESIA_05_2005_H5N1_AGE_18_49YO_1DY_UP		HOWARD_NEUTROPHIL_INACT_MONOV_INFLUENZA_A_INDONESIA_05_2005_H5N1_AGE_18_49YO_1DY_UP	HOWARD_PBMC_INACT_MONOV_INFLUENZA_A_INDONESIA_05_2005_H5N1_AGE_19_39YO_AS03_ADJUVANT_VS_BUFFER_1DY_UP	HOWARD_DENDRITIC_CELL_INACT_MONOV_INFLUENZA_A_INDONESIA_05_2005_H5N1_AGE_18_49YO_1DY_UP	HARALAMBIEVA_PBMC_M_M_R_II_AGE_11_22YO_VACCINATED_VS_UNVACCINATED_7YR_UP		GSE13485_DAY1_VS_DAY7_YF17D_VACCINE_PBMC_DN		GSE13485_CTRL_VS_DAY7_YF17D_VACCINE_PBMC_DN		ZAK_PBMC_MRKAD5_HIV_1_GAG_POL_NEF_AGE_20_50YO_1DY_UP	OSMAN_BLOOD_CHAD63_KH_AGE_18_50YO_HIGH_DOSE_SUBJECTS_24HR_UP		ERWIN_COHEN_BLOOD_TC_83_AGE_23_48YO_VACCINATED_VS_CONTROL_2DY_UP	GSE18791_CTRL_VS_NEWCASTLE_VIRUS_DC_8H_DN
CASP7		HOWARD_MONOCYTE_INACT_MONOV_INFLUENZA_A_INDONESIA_05_2005_H5N1_AGE_18_49YO_1DY_UP		HOWARD_NEUTROPHIL_INACT_MONOV_INFLUENZA_A_INDONESIA_05_2005_H5N1_AGE_18_49YO_1DY_UP	HOWARD_PBMC_INACT_MONOV_INFLUENZA_A_INDONESIA_05_2005_H5N1_AGE_19_39YO_AS03_ADJUVANT_VS_BUFFER_1DY_UP	HOWARD_DENDRITIC_CELL_INACT_MONOV_INFLUENZA_A_INDONESIA_05_2005_H5N1_AGE_18_49YO_1DY_UP	HARALAMBIEVA_PBMC_M_M_R_II_AGE_11_22YO_VACCINATED_VS_UNVACCINATED_7YR_UP		GSE13485_DAY1_VS_DAY7_YF17D_VACCINE_PBMC_DN				ZAK_PBMC_MRKAD5_HIV_1_GAG_POL_NEF_AGE_20_50YO_1DY_UP	OSMAN_BLOOD_CHAD63_KH_AGE_18_50YO_HIGH_DOSE_SUBJECTS_24HR_UP
GBP1P1		HOWARD_MONOCYTE_INACT_MONOV_INFLUENZA_A_INDONESIA_05_2005_H5N1_AGE_18_49YO_1DY_UP		HOWARD_NEUTROPHIL_INACT_MONOV_INFLUENZA_A_INDONESIA_05_2005_H5N1_AGE_18_49YO_1DY_UP	HOWARD_PBMC_INACT_MONOV_INFLUENZA_A_INDONESIA_05_2005_H5N1_AGE_19_39YO_AS03_ADJUVANT_VS_BUFFER_1DY_UP	HOWARD_DENDRITIC_CELL_INACT_MONOV_INFLUENZA_A_INDONESIA_05_2005_H5N1_AGE_18_49YO_1DY_UP								OSMAN_BLOOD_CHAD63_KH_AGE_18_50YO_HIGH_DOSE_SUBJECTS_24HR_UP
CXCL10		HOWARD_MONOCYTE_INACT_MONOV_INFLUENZA_A_INDONESIA_05_2005_H5N1_AGE_18_49YO_1DY_UP			HOWARD_PBMC_INACT_MONOV_INFLUENZA_A_INDONESIA_05_2005_H5N1_AGE_19_39YO_AS03_ADJUVANT_VS_BUFFER_1DY_UP	HOWARD_DENDRITIC_CELL_INACT_MONOV_INFLUENZA_A_INDONESIA_05_2005_H5N1_AGE_18_49YO_1DY_UP	HARALAMBIEVA_PBMC_M_M_R_II_AGE_11_22YO_VACCINATED_VS_UNVACCINATED_7YR_UP		GSE13485_DAY1_VS_DAY7_YF17D_VACCINE_PBMC_DN	GAUCHER_PBMC_YF_VAX_STAMARIL_UNKNOWN_AGE_7DY_UP	GSE13485_CTRL_VS_DAY7_YF17D_VACCINE_PBMC_DN		ZAK_PBMC_MRKAD5_HIV_1_GAG_POL_NEF_AGE_20_50YO_1DY_UP	OSMAN_BLOOD_CHAD63_KH_AGE_18_50YO_HIGH_DOSE_SUBJECTS_24HR_UP		ERWIN_COHEN_BLOOD_TC_83_AGE_23_48YO_VACCINATED_VS_CONTROL_2DY_UP	GSE18791_CTRL_VS_NEWCASTLE_VIRUS_DC_8H_DN
C2		HOWARD_MONOCYTE_INACT_MONOV_INFLUENZA_A_INDONESIA_05_2005_H5N1_AGE_18_49YO_1DY_UP			HOWARD_PBMC_INACT_MONOV_INFLUENZA_A_INDONESIA_05_2005_H5N1_AGE_19_39YO_AS03_ADJUVANT_VS_BUFFER_1DY_UP	HOWARD_DENDRITIC_CELL_INACT_MONOV_INFLUENZA_A_INDONESIA_05_2005_H5N1_AGE_18_49YO_1DY_UP	HARALAMBIEVA_PBMC_M_M_R_II_AGE_11_22YO_VACCINATED_VS_UNVACCINATED_7YR_UP				GSE13485_CTRL_VS_DAY7_YF17D_VACCINE_PBMC_DN		ZAK_PBMC_MRKAD5_HIV_1_GAG_POL_NEF_AGE_20_50YO_1DY_UP	OSMAN_BLOOD_CHAD63_KH_AGE_18_50YO_HIGH_DOSE_SUBJECTS_24HR_UP
SDC3		HOWARD_MONOCYTE_INACT_MONOV_INFLUENZA_A_INDONESIA_05_2005_H5N1_AGE_18_49YO_1DY_UP			HOWARD_PBMC_INACT_MONOV_INFLUENZA_A_INDONESIA_05_2005_H5N1_AGE_19_39YO_AS03_ADJUVANT_VS_BUFFER_1DY_UP	HOWARD_DENDRITIC_CELL_INACT_MONOV_INFLUENZA_A_INDONESIA_05_2005_H5N1_AGE_18_49YO_1DY_UP	HARALAMBIEVA_PBMC_M_M_R_II_AGE_11_22YO_VACCINATED_VS_UNVACCINATED_7YR_UP						ZAK_PBMC_MRKAD5_HIV_1_GAG_POL_NEF_AGE_20_50YO_1DY_UP	OSMAN_BLOOD_CHAD63_KH_AGE_18_50YO_HIGH_DOSE_SUBJECTS_24HR_UP
TGM2		HOWARD_MONOCYTE_INACT_MONOV_INFLUENZA_A_INDONESIA_05_2005_H5N1_AGE_18_49YO_1DY_UP			HOWARD_PBMC_INACT_MONOV_INFLUENZA_A_INDONESIA_05_2005_H5N1_AGE_19_39YO_AS03_ADJUVANT_VS_BUFFER_1DY_UP	HOWARD_DENDRITIC_CELL_INACT_MONOV_INFLUENZA_A_INDONESIA_05_2005_H5N1_AGE_18_49YO_1DY_UP							ZAK_PBMC_MRKAD5_HIV_1_GAG_POL_NEF_AGE_20_50YO_1DY_UP	OSMAN_BLOOD_CHAD63_KH_AGE_18_50YO_HIGH_DOSE_SUBJECTS_24HR_UP
SOCS3		HOWARD_MONOCYTE_INACT_MONOV_INFLUENZA_A_INDONESIA_05_2005_H5N1_AGE_18_49YO_1DY_UP			HOWARD_PBMC_INACT_MONOV_INFLUENZA_A_INDONESIA_05_2005_H5N1_AGE_19_39YO_AS03_ADJUVANT_VS_BUFFER_1DY_UP	HOWARD_DENDRITIC_CELL_INACT_MONOV_INFLUENZA_A_INDONESIA_05_2005_H5N1_AGE_18_49YO_1DY_UP							ZAK_PBMC_MRKAD5_HIV_1_GAG_POL_NEF_AGE_20_50YO_1DY_UP
CDCP1		HOWARD_MONOCYTE_INACT_MONOV_INFLUENZA_A_INDONESIA_05_2005_H5N1_AGE_18_49YO_1DY_UP			HOWARD_PBMC_INACT_MONOV_INFLUENZA_A_INDONESIA_05_2005_H5N1_AGE_19_39YO_AS03_ADJUVANT_VS_BUFFER_1DY_UP	HOWARD_DENDRITIC_CELL_INACT_MONOV_INFLUENZA_A_INDONESIA_05_2005_H5N1_AGE_18_49YO_1DY_UP
MYOF		HOWARD_MONOCYTE_INACT_MONOV_INFLUENZA_A_INDONESIA_05_2005_H5N1_AGE_18_49YO_1DY_UP			HOWARD_PBMC_INACT_MONOV_INFLUENZA_A_INDONESIA_05_2005_H5N1_AGE_19_39YO_AS03_ADJUVANT_VS_BUFFER_1DY_UP			FRANCO_BLOOD_SANOFI_PASTEUR_SA_INACTIVATED_INFLUENZA_VACCINE_CORRELATED_WITH_ANTIBODY_RESPONSE_AGE_18_40YO_1DY_POSITIVE	GSE13485_DAY1_VS_DAY7_YF17D_VACCINE_PBMC_DN	GAUCHER_PBMC_YF_VAX_STAMARIL_UNKNOWN_AGE_7DY_UP	GSE13485_CTRL_VS_DAY7_YF17D_VACCINE_PBMC_DN		ZAK_PBMC_MRKAD5_HIV_1_GAG_POL_NEF_AGE_20_50YO_1DY_UP	OSMAN_BLOOD_CHAD63_KH_AGE_18_50YO_HIGH_DOSE_SUBJECTS_24HR_UP	GAUCHER_PBMC_YF_VAX_STAMARIL_UNKNOWN_AGE_10DY_UP
IL31RA		HOWARD_MONOCYTE_INACT_MONOV_INFLUENZA_A_INDONESIA_05_2005_H5N1_AGE_18_49YO_1DY_UP			HOWARD_PBMC_INACT_MONOV_INFLUENZA_A_INDONESIA_05_2005_H5N1_AGE_19_39YO_AS03_ADJUVANT_VS_BUFFER_1DY_UP									OSMAN_BLOOD_CHAD63_KH_AGE_18_50YO_HIGH_DOSE_SUBJECTS_24HR_UP
ZNF702P		HOWARD_MONOCYTE_INACT_MONOV_INFLUENZA_A_INDONESIA_05_2005_H5N1_AGE_18_49YO_1DY_UP			HOWARD_PBMC_INACT_MONOV_INFLUENZA_A_INDONESIA_05_2005_H5N1_AGE_19_39YO_AS03_ADJUVANT_VS_BUFFER_1DY_UP									OSMAN_BLOOD_CHAD63_KH_AGE_18_50YO_HIGH_DOSE_SUBJECTS_24HR_UP
FAM225A		HOWARD_MONOCYTE_INACT_MONOV_INFLUENZA_A_INDONESIA_05_2005_H5N1_AGE_18_49YO_1DY_UP				HOWARD_DENDRITIC_CELL_INACT_MONOV_INFLUENZA_A_INDONESIA_05_2005_H5N1_AGE_18_49YO_1DY_UP	HARALAMBIEVA_PBMC_M_M_R_II_AGE_11_22YO_VACCINATED_VS_UNVACCINATED_7YR_UP	FRANCO_BLOOD_SANOFI_PASTEUR_SA_INACTIVATED_INFLUENZA_VACCINE_CORRELATED_WITH_ANTIBODY_RESPONSE_AGE_18_40YO_1DY_POSITIVE					ZAK_PBMC_MRKAD5_HIV_1_GAG_POL_NEF_AGE_20_50YO_1DY_UP	OSMAN_BLOOD_CHAD63_KH_AGE_18_50YO_HIGH_DOSE_SUBJECTS_24HR_UP
ENPP2		HOWARD_MONOCYTE_INACT_MONOV_INFLUENZA_A_INDONESIA_05_2005_H5N1_AGE_18_49YO_1DY_UP				HOWARD_DENDRITIC_CELL_INACT_MONOV_INFLUENZA_A_INDONESIA_05_2005_H5N1_AGE_18_49YO_1DY_UP	HARALAMBIEVA_PBMC_M_M_R_II_AGE_11_22YO_VACCINATED_VS_UNVACCINATED_7YR_UP							OSMAN_BLOOD_CHAD63_KH_AGE_18_50YO_HIGH_DOSE_SUBJECTS_24HR_UP
CUL1		HOWARD_MONOCYTE_INACT_MONOV_INFLUENZA_A_INDONESIA_05_2005_H5N1_AGE_18_49YO_1DY_UP				HOWARD_DENDRITIC_CELL_INACT_MONOV_INFLUENZA_A_INDONESIA_05_2005_H5N1_AGE_18_49YO_1DY_UP		FRANCO_BLOOD_SANOFI_PASTEUR_SA_INACTIVATED_INFLUENZA_VACCINE_CORRELATED_WITH_ANTIBODY_RESPONSE_AGE_18_40YO_1DY_POSITIVE		GAUCHER_PBMC_YF_VAX_STAMARIL_UNKNOWN_AGE_7DY_UP			ZAK_PBMC_MRKAD5_HIV_1_GAG_POL_NEF_AGE_20_50YO_1DY_UP	OSMAN_BLOOD_CHAD63_KH_AGE_18_50YO_HIGH_DOSE_SUBJECTS_24HR_UP	GAUCHER_PBMC_YF_VAX_STAMARIL_UNKNOWN_AGE_10DY_UP
PLAC8		HOWARD_MONOCYTE_INACT_MONOV_INFLUENZA_A_INDONESIA_05_2005_H5N1_AGE_18_49YO_1DY_UP				HOWARD_DENDRITIC_CELL_INACT_MONOV_INFLUENZA_A_INDONESIA_05_2005_H5N1_AGE_18_49YO_1DY_UP			GSE13485_DAY1_VS_DAY7_YF17D_VACCINE_PBMC_DN	GAUCHER_PBMC_YF_VAX_STAMARIL_UNKNOWN_AGE_7DY_UP	GSE13485_CTRL_VS_DAY7_YF17D_VACCINE_PBMC_DN		ZAK_PBMC_MRKAD5_HIV_1_GAG_POL_NEF_AGE_20_50YO_1DY_UP	OSMAN_BLOOD_CHAD63_KH_AGE_18_50YO_HIGH_DOSE_SUBJECTS_24HR_UP	GAUCHER_PBMC_YF_VAX_STAMARIL_UNKNOWN_AGE_10DY_UP
CAMK2D		HOWARD_MONOCYTE_INACT_MONOV_INFLUENZA_A_INDONESIA_05_2005_H5N1_AGE_18_49YO_1DY_UP											ZAK_PBMC_MRKAD5_HIV_1_GAG_POL_NEF_AGE_20_50YO_1DY_UP	OSMAN_BLOOD_CHAD63_KH_AGE_18_50YO_HIGH_DOSE_SUBJECTS_24HR_UP
PITPNM2		HOWARD_MONOCYTE_INACT_MONOV_INFLUENZA_A_INDONESIA_05_2005_H5N1_AGE_18_49YO_1DY_UP
LAMP3			HOWARD_NEUTROPHIL_INACT_MONOV_INFLUENZA_A_INDONESIA_05_2005_H5N1_AGE_18_49YO_3DY_UP	HOWARD_NEUTROPHIL_INACT_MONOV_INFLUENZA_A_INDONESIA_05_2005_H5N1_AGE_18_49YO_1DY_UP	HOWARD_PBMC_INACT_MONOV_INFLUENZA_A_INDONESIA_05_2005_H5N1_AGE_19_39YO_AS03_ADJUVANT_VS_BUFFER_1DY_UP		HARALAMBIEVA_PBMC_M_M_R_II_AGE_11_22YO_VACCINATED_VS_UNVACCINATED_7YR_UP	FRANCO_BLOOD_SANOFI_PASTEUR_SA_INACTIVATED_INFLUENZA_VACCINE_CORRELATED_WITH_ANTIBODY_RESPONSE_AGE_18_40YO_1DY_POSITIVE	GSE13485_DAY1_VS_DAY7_YF17D_VACCINE_PBMC_DN	GAUCHER_PBMC_YF_VAX_STAMARIL_UNKNOWN_AGE_7DY_UP	GSE13485_CTRL_VS_DAY7_YF17D_VACCINE_PBMC_DN		ZAK_PBMC_MRKAD5_HIV_1_GAG_POL_NEF_AGE_20_50YO_1DY_UP	OSMAN_BLOOD_CHAD63_KH_AGE_18_50YO_HIGH_DOSE_SUBJECTS_24HR_UP		ERWIN_COHEN_BLOOD_TC_83_AGE_23_48YO_VACCINATED_VS_CONTROL_2DY_UP
HERC6			HOWARD_NEUTROPHIL_INACT_MONOV_INFLUENZA_A_INDONESIA_05_2005_H5N1_AGE_18_49YO_3DY_UP	HOWARD_NEUTROPHIL_INACT_MONOV_INFLUENZA_A_INDONESIA_05_2005_H5N1_AGE_18_49YO_1DY_UP			HARALAMBIEVA_PBMC_M_M_R_II_AGE_11_22YO_VACCINATED_VS_UNVACCINATED_7YR_UP	FRANCO_BLOOD_SANOFI_PASTEUR_SA_INACTIVATED_INFLUENZA_VACCINE_CORRELATED_WITH_ANTIBODY_RESPONSE_AGE_18_40YO_1DY_POSITIVE	GSE13485_DAY1_VS_DAY7_YF17D_VACCINE_PBMC_DN	GAUCHER_PBMC_YF_VAX_STAMARIL_UNKNOWN_AGE_7DY_UP	GSE13485_CTRL_VS_DAY7_YF17D_VACCINE_PBMC_DN		ZAK_PBMC_MRKAD5_HIV_1_GAG_POL_NEF_AGE_20_50YO_1DY_UP	OSMAN_BLOOD_CHAD63_KH_AGE_18_50YO_HIGH_DOSE_SUBJECTS_24HR_UP	GAUCHER_PBMC_YF_VAX_STAMARIL_UNKNOWN_AGE_10DY_UP	ERWIN_COHEN_BLOOD_TC_83_AGE_23_48YO_VACCINATED_VS_CONTROL_2DY_UP	GSE18791_CTRL_VS_NEWCASTLE_VIRUS_DC_8H_DN
DHX58			HOWARD_NEUTROPHIL_INACT_MONOV_INFLUENZA_A_INDONESIA_05_2005_H5N1_AGE_18_49YO_3DY_UP	HOWARD_NEUTROPHIL_INACT_MONOV_INFLUENZA_A_INDONESIA_05_2005_H5N1_AGE_18_49YO_1DY_UP			HARALAMBIEVA_PBMC_M_M_R_II_AGE_11_22YO_VACCINATED_VS_UNVACCINATED_7YR_UP	FRANCO_BLOOD_SANOFI_PASTEUR_SA_INACTIVATED_INFLUENZA_VACCINE_CORRELATED_WITH_ANTIBODY_RESPONSE_AGE_18_40YO_1DY_POSITIVE	GSE13485_DAY1_VS_DAY7_YF17D_VACCINE_PBMC_DN	GAUCHER_PBMC_YF_VAX_STAMARIL_UNKNOWN_AGE_7DY_UP	GSE13485_CTRL_VS_DAY7_YF17D_VACCINE_PBMC_DN		ZAK_PBMC_MRKAD5_HIV_1_GAG_POL_NEF_AGE_20_50YO_1DY_UP	OSMAN_BLOOD_CHAD63_KH_AGE_18_50YO_HIGH_DOSE_SUBJECTS_24HR_UP	GAUCHER_PBMC_YF_VAX_STAMARIL_UNKNOWN_AGE_10DY_UP		GSE18791_CTRL_VS_NEWCASTLE_VIRUS_DC_8H_DN
MOV10			HOWARD_NEUTROPHIL_INACT_MONOV_INFLUENZA_A_INDONESIA_05_2005_H5N1_AGE_18_49YO_3DY_UP	HOWARD_NEUTROPHIL_INACT_MONOV_INFLUENZA_A_INDONESIA_05_2005_H5N1_AGE_18_49YO_1DY_UP			HARALAMBIEVA_PBMC_M_M_R_II_AGE_11_22YO_VACCINATED_VS_UNVACCINATED_7YR_UP	FRANCO_BLOOD_SANOFI_PASTEUR_SA_INACTIVATED_INFLUENZA_VACCINE_CORRELATED_WITH_ANTIBODY_RESPONSE_AGE_18_40YO_1DY_POSITIVE		GAUCHER_PBMC_YF_VAX_STAMARIL_UNKNOWN_AGE_7DY_UP			ZAK_PBMC_MRKAD5_HIV_1_GAG_POL_NEF_AGE_20_50YO_1DY_UP	OSMAN_BLOOD_CHAD63_KH_AGE_18_50YO_HIGH_DOSE_SUBJECTS_24HR_UP	GAUCHER_PBMC_YF_VAX_STAMARIL_UNKNOWN_AGE_10DY_UP	ERWIN_COHEN_BLOOD_TC_83_AGE_23_48YO_VACCINATED_VS_CONTROL_2DY_UP	GSE18791_CTRL_VS_NEWCASTLE_VIRUS_DC_8H_DN
SPATS2L			HOWARD_NEUTROPHIL_INACT_MONOV_INFLUENZA_A_INDONESIA_05_2005_H5N1_AGE_18_49YO_3DY_UP	HOWARD_NEUTROPHIL_INACT_MONOV_INFLUENZA_A_INDONESIA_05_2005_H5N1_AGE_18_49YO_1DY_UP			HARALAMBIEVA_PBMC_M_M_R_II_AGE_11_22YO_VACCINATED_VS_UNVACCINATED_7YR_UP		GSE13485_DAY1_VS_DAY7_YF17D_VACCINE_PBMC_DN	GAUCHER_PBMC_YF_VAX_STAMARIL_UNKNOWN_AGE_7DY_UP	GSE13485_CTRL_VS_DAY7_YF17D_VACCINE_PBMC_DN		ZAK_PBMC_MRKAD5_HIV_1_GAG_POL_NEF_AGE_20_50YO_1DY_UP	OSMAN_BLOOD_CHAD63_KH_AGE_18_50YO_HIGH_DOSE_SUBJECTS_24HR_UP	GAUCHER_PBMC_YF_VAX_STAMARIL_UNKNOWN_AGE_10DY_UP	ERWIN_COHEN_BLOOD_TC_83_AGE_23_48YO_VACCINATED_VS_CONTROL_2DY_UP
TMEM268			HOWARD_NEUTROPHIL_INACT_MONOV_INFLUENZA_A_INDONESIA_05_2005_H5N1_AGE_18_49YO_3DY_UP	HOWARD_NEUTROPHIL_INACT_MONOV_INFLUENZA_A_INDONESIA_05_2005_H5N1_AGE_18_49YO_1DY_UP			HARALAMBIEVA_PBMC_M_M_R_II_AGE_11_22YO_VACCINATED_VS_UNVACCINATED_7YR_UP		GSE13485_DAY1_VS_DAY7_YF17D_VACCINE_PBMC_DN	GAUCHER_PBMC_YF_VAX_STAMARIL_UNKNOWN_AGE_7DY_UP			ZAK_PBMC_MRKAD5_HIV_1_GAG_POL_NEF_AGE_20_50YO_1DY_UP	OSMAN_BLOOD_CHAD63_KH_AGE_18_50YO_HIGH_DOSE_SUBJECTS_24HR_UP	GAUCHER_PBMC_YF_VAX_STAMARIL_UNKNOWN_AGE_10DY_UP	ERWIN_COHEN_BLOOD_TC_83_AGE_23_48YO_VACCINATED_VS_CONTROL_2DY_UP	GSE18791_CTRL_VS_NEWCASTLE_VIRUS_DC_8H_DN
CD2AP			HOWARD_NEUTROPHIL_INACT_MONOV_INFLUENZA_A_INDONESIA_05_2005_H5N1_AGE_18_49YO_3DY_UP	HOWARD_NEUTROPHIL_INACT_MONOV_INFLUENZA_A_INDONESIA_05_2005_H5N1_AGE_18_49YO_1DY_UP			HARALAMBIEVA_PBMC_M_M_R_II_AGE_11_22YO_VACCINATED_VS_UNVACCINATED_7YR_UP						ZAK_PBMC_MRKAD5_HIV_1_GAG_POL_NEF_AGE_20_50YO_1DY_UP	OSMAN_BLOOD_CHAD63_KH_AGE_18_50YO_HIGH_DOSE_SUBJECTS_24HR_UP
GBP6			HOWARD_NEUTROPHIL_INACT_MONOV_INFLUENZA_A_INDONESIA_05_2005_H5N1_AGE_18_49YO_3DY_UP	HOWARD_NEUTROPHIL_INACT_MONOV_INFLUENZA_A_INDONESIA_05_2005_H5N1_AGE_18_49YO_1DY_UP			HARALAMBIEVA_PBMC_M_M_R_II_AGE_11_22YO_VACCINATED_VS_UNVACCINATED_7YR_UP							OSMAN_BLOOD_CHAD63_KH_AGE_18_50YO_HIGH_DOSE_SUBJECTS_24HR_UP
SAMHD1			HOWARD_NEUTROPHIL_INACT_MONOV_INFLUENZA_A_INDONESIA_05_2005_H5N1_AGE_18_49YO_3DY_UP	HOWARD_NEUTROPHIL_INACT_MONOV_INFLUENZA_A_INDONESIA_05_2005_H5N1_AGE_18_49YO_1DY_UP										OSMAN_BLOOD_CHAD63_KH_AGE_18_50YO_HIGH_DOSE_SUBJECTS_24HR_UP
ZNF496			HOWARD_NEUTROPHIL_INACT_MONOV_INFLUENZA_A_INDONESIA_05_2005_H5N1_AGE_18_49YO_3DY_UP	HOWARD_NEUTROPHIL_INACT_MONOV_INFLUENZA_A_INDONESIA_05_2005_H5N1_AGE_18_49YO_1DY_UP										OSMAN_BLOOD_CHAD63_KH_AGE_18_50YO_HIGH_DOSE_SUBJECTS_24HR_UP
EVL			HOWARD_NEUTROPHIL_INACT_MONOV_INFLUENZA_A_INDONESIA_05_2005_H5N1_AGE_18_49YO_3DY_UP									ZAK_PBMC_MRKAD5_HIV_1_GAG_POL_NEF_AGE_20_50YO_1DY_DN
EXOSC9			HOWARD_NEUTROPHIL_INACT_MONOV_INFLUENZA_A_INDONESIA_05_2005_H5N1_AGE_18_49YO_3DY_UP											OSMAN_BLOOD_CHAD63_KH_AGE_18_50YO_HIGH_DOSE_SUBJECTS_24HR_UP
FZD5				HOWARD_NEUTROPHIL_INACT_MONOV_INFLUENZA_A_INDONESIA_05_2005_H5N1_AGE_18_49YO_1DY_UP	HOWARD_PBMC_INACT_MONOV_INFLUENZA_A_INDONESIA_05_2005_H5N1_AGE_19_39YO_AS03_ADJUVANT_VS_BUFFER_1DY_UP									OSMAN_BLOOD_CHAD63_KH_AGE_18_50YO_HIGH_DOSE_SUBJECTS_24HR_UP
NCOA7				HOWARD_NEUTROPHIL_INACT_MONOV_INFLUENZA_A_INDONESIA_05_2005_H5N1_AGE_18_49YO_1DY_UP			HARALAMBIEVA_PBMC_M_M_R_II_AGE_11_22YO_VACCINATED_VS_UNVACCINATED_7YR_UP	FRANCO_BLOOD_SANOFI_PASTEUR_SA_INACTIVATED_INFLUENZA_VACCINE_CORRELATED_WITH_ANTIBODY_RESPONSE_AGE_18_40YO_1DY_POSITIVE	GSE13485_DAY1_VS_DAY7_YF17D_VACCINE_PBMC_DN	GAUCHER_PBMC_YF_VAX_STAMARIL_UNKNOWN_AGE_7DY_UP	GSE13485_CTRL_VS_DAY7_YF17D_VACCINE_PBMC_DN			OSMAN_BLOOD_CHAD63_KH_AGE_18_50YO_HIGH_DOSE_SUBJECTS_24HR_UP	GAUCHER_PBMC_YF_VAX_STAMARIL_UNKNOWN_AGE_10DY_UP	ERWIN_COHEN_BLOOD_TC_83_AGE_23_48YO_VACCINATED_VS_CONTROL_2DY_UP	GSE18791_CTRL_VS_NEWCASTLE_VIRUS_DC_8H_DN
PARP11				HOWARD_NEUTROPHIL_INACT_MONOV_INFLUENZA_A_INDONESIA_05_2005_H5N1_AGE_18_49YO_1DY_UP			HARALAMBIEVA_PBMC_M_M_R_II_AGE_11_22YO_VACCINATED_VS_UNVACCINATED_7YR_UP						ZAK_PBMC_MRKAD5_HIV_1_GAG_POL_NEF_AGE_20_50YO_1DY_UP	OSMAN_BLOOD_CHAD63_KH_AGE_18_50YO_HIGH_DOSE_SUBJECTS_24HR_UP
TMEM229B				HOWARD_NEUTROPHIL_INACT_MONOV_INFLUENZA_A_INDONESIA_05_2005_H5N1_AGE_18_49YO_1DY_UP			HARALAMBIEVA_PBMC_M_M_R_II_AGE_11_22YO_VACCINATED_VS_UNVACCINATED_7YR_UP						ZAK_PBMC_MRKAD5_HIV_1_GAG_POL_NEF_AGE_20_50YO_1DY_UP	OSMAN_BLOOD_CHAD63_KH_AGE_18_50YO_HIGH_DOSE_SUBJECTS_24HR_UP
C19orf12				HOWARD_NEUTROPHIL_INACT_MONOV_INFLUENZA_A_INDONESIA_05_2005_H5N1_AGE_18_49YO_1DY_UP										OSMAN_BLOOD_CHAD63_KH_AGE_18_50YO_HIGH_DOSE_SUBJECTS_24HR_UP
PUS3				HOWARD_NEUTROPHIL_INACT_MONOV_INFLUENZA_A_INDONESIA_05_2005_H5N1_AGE_18_49YO_1DY_UP										OSMAN_BLOOD_CHAD63_KH_AGE_18_50YO_HIGH_DOSE_SUBJECTS_24HR_UP
ERAP2				HOWARD_NEUTROPHIL_INACT_MONOV_INFLUENZA_A_INDONESIA_05_2005_H5N1_AGE_18_49YO_1DY_UP										OSMAN_BLOOD_CHAD63_KH_AGE_18_50YO_HIGH_DOSE_SUBJECTS_24HR_UP
NUP205				HOWARD_NEUTROPHIL_INACT_MONOV_INFLUENZA_A_INDONESIA_05_2005_H5N1_AGE_18_49YO_1DY_UP										OSMAN_BLOOD_CHAD63_KH_AGE_18_50YO_HIGH_DOSE_SUBJECTS_24HR_UP
SCRN1				HOWARD_NEUTROPHIL_INACT_MONOV_INFLUENZA_A_INDONESIA_05_2005_H5N1_AGE_18_49YO_1DY_UP
SH3PXD2A				HOWARD_NEUTROPHIL_INACT_MONOV_INFLUENZA_A_INDONESIA_05_2005_H5N1_AGE_18_49YO_1DY_UP
NAA15				HOWARD_NEUTROPHIL_INACT_MONOV_INFLUENZA_A_INDONESIA_05_2005_H5N1_AGE_18_49YO_1DY_UP
RUFY4					HOWARD_PBMC_INACT_MONOV_INFLUENZA_A_INDONESIA_05_2005_H5N1_AGE_19_39YO_AS03_ADJUVANT_VS_BUFFER_1DY_UP	HOWARD_DENDRITIC_CELL_INACT_MONOV_INFLUENZA_A_INDONESIA_05_2005_H5N1_AGE_18_49YO_1DY_UP	HARALAMBIEVA_PBMC_M_M_R_II_AGE_11_22YO_VACCINATED_VS_UNVACCINATED_7YR_UP						ZAK_PBMC_MRKAD5_HIV_1_GAG_POL_NEF_AGE_20_50YO_1DY_UP	OSMAN_BLOOD_CHAD63_KH_AGE_18_50YO_HIGH_DOSE_SUBJECTS_24HR_UP
C1QB					HOWARD_PBMC_INACT_MONOV_INFLUENZA_A_INDONESIA_05_2005_H5N1_AGE_19_39YO_AS03_ADJUVANT_VS_BUFFER_1DY_UP	HOWARD_DENDRITIC_CELL_INACT_MONOV_INFLUENZA_A_INDONESIA_05_2005_H5N1_AGE_18_49YO_1DY_UP				GAUCHER_PBMC_YF_VAX_STAMARIL_UNKNOWN_AGE_7DY_UP			ZAK_PBMC_MRKAD5_HIV_1_GAG_POL_NEF_AGE_20_50YO_1DY_UP	OSMAN_BLOOD_CHAD63_KH_AGE_18_50YO_HIGH_DOSE_SUBJECTS_24HR_UP
IL4I1					HOWARD_PBMC_INACT_MONOV_INFLUENZA_A_INDONESIA_05_2005_H5N1_AGE_19_39YO_AS03_ADJUVANT_VS_BUFFER_1DY_UP		HARALAMBIEVA_PBMC_M_M_R_II_AGE_11_22YO_VACCINATED_VS_UNVACCINATED_7YR_UP				GSE13485_CTRL_VS_DAY7_YF17D_VACCINE_PBMC_DN		ZAK_PBMC_MRKAD5_HIV_1_GAG_POL_NEF_AGE_20_50YO_1DY_UP	OSMAN_BLOOD_CHAD63_KH_AGE_18_50YO_HIGH_DOSE_SUBJECTS_24HR_UP
ADPRH					HOWARD_PBMC_INACT_MONOV_INFLUENZA_A_INDONESIA_05_2005_H5N1_AGE_19_39YO_AS03_ADJUVANT_VS_BUFFER_1DY_UP		HARALAMBIEVA_PBMC_M_M_R_II_AGE_11_22YO_VACCINATED_VS_UNVACCINATED_7YR_UP						ZAK_PBMC_MRKAD5_HIV_1_GAG_POL_NEF_AGE_20_50YO_1DY_UP	OSMAN_BLOOD_CHAD63_KH_AGE_18_50YO_HIGH_DOSE_SUBJECTS_24HR_UP
P2RX7					HOWARD_PBMC_INACT_MONOV_INFLUENZA_A_INDONESIA_05_2005_H5N1_AGE_19_39YO_AS03_ADJUVANT_VS_BUFFER_1DY_UP		HARALAMBIEVA_PBMC_M_M_R_II_AGE_11_22YO_VACCINATED_VS_UNVACCINATED_7YR_UP						ZAK_PBMC_MRKAD5_HIV_1_GAG_POL_NEF_AGE_20_50YO_1DY_UP	OSMAN_BLOOD_CHAD63_KH_AGE_18_50YO_HIGH_DOSE_SUBJECTS_24HR_UP
SCIMP					HOWARD_PBMC_INACT_MONOV_INFLUENZA_A_INDONESIA_05_2005_H5N1_AGE_19_39YO_AS03_ADJUVANT_VS_BUFFER_1DY_UP			FRANCO_BLOOD_SANOFI_PASTEUR_SA_INACTIVATED_INFLUENZA_VACCINE_CORRELATED_WITH_ANTIBODY_RESPONSE_AGE_18_40YO_1DY_POSITIVE		GAUCHER_PBMC_YF_VAX_STAMARIL_UNKNOWN_AGE_7DY_UP			ZAK_PBMC_MRKAD5_HIV_1_GAG_POL_NEF_AGE_20_50YO_1DY_UP	OSMAN_BLOOD_CHAD63_KH_AGE_18_50YO_HIGH_DOSE_SUBJECTS_24HR_UP
C1QA					HOWARD_PBMC_INACT_MONOV_INFLUENZA_A_INDONESIA_05_2005_H5N1_AGE_19_39YO_AS03_ADJUVANT_VS_BUFFER_1DY_UP					GAUCHER_PBMC_YF_VAX_STAMARIL_UNKNOWN_AGE_7DY_UP				OSMAN_BLOOD_CHAD63_KH_AGE_18_50YO_HIGH_DOSE_SUBJECTS_24HR_UP
CCR2					HOWARD_PBMC_INACT_MONOV_INFLUENZA_A_INDONESIA_05_2005_H5N1_AGE_19_39YO_AS03_ADJUVANT_VS_BUFFER_1DY_UP								ZAK_PBMC_MRKAD5_HIV_1_GAG_POL_NEF_AGE_20_50YO_1DY_UP	OSMAN_BLOOD_CHAD63_KH_AGE_18_50YO_HIGH_DOSE_SUBJECTS_24HR_UP
ANO5					HOWARD_PBMC_INACT_MONOV_INFLUENZA_A_INDONESIA_05_2005_H5N1_AGE_19_39YO_AS03_ADJUVANT_VS_BUFFER_1DY_UP									OSMAN_BLOOD_CHAD63_KH_AGE_18_50YO_HIGH_DOSE_SUBJECTS_24HR_UP
FAM110B					HOWARD_PBMC_INACT_MONOV_INFLUENZA_A_INDONESIA_05_2005_H5N1_AGE_19_39YO_AS03_ADJUVANT_VS_BUFFER_1DY_UP
C1QC						HOWARD_DENDRITIC_CELL_INACT_MONOV_INFLUENZA_A_INDONESIA_05_2005_H5N1_AGE_18_49YO_1DY_UP							ZAK_PBMC_MRKAD5_HIV_1_GAG_POL_NEF_AGE_20_50YO_1DY_UP
OTOF							HARALAMBIEVA_PBMC_M_M_R_II_AGE_11_22YO_VACCINATED_VS_UNVACCINATED_7YR_UP	FRANCO_BLOOD_SANOFI_PASTEUR_SA_INACTIVATED_INFLUENZA_VACCINE_CORRELATED_WITH_ANTIBODY_RESPONSE_AGE_18_40YO_1DY_POSITIVE		GAUCHER_PBMC_YF_VAX_STAMARIL_UNKNOWN_AGE_7DY_UP	GSE13485_CTRL_VS_DAY7_YF17D_VACCINE_PBMC_DN		ZAK_PBMC_MRKAD5_HIV_1_GAG_POL_NEF_AGE_20_50YO_1DY_UP	OSMAN_BLOOD_CHAD63_KH_AGE_18_50YO_HIGH_DOSE_SUBJECTS_24HR_UP	GAUCHER_PBMC_YF_VAX_STAMARIL_UNKNOWN_AGE_10DY_UP
AXL							HARALAMBIEVA_PBMC_M_M_R_II_AGE_11_22YO_VACCINATED_VS_UNVACCINATED_7YR_UP				GSE13485_CTRL_VS_DAY7_YF17D_VACCINE_PBMC_DN		ZAK_PBMC_MRKAD5_HIV_1_GAG_POL_NEF_AGE_20_50YO_1DY_UP
ATP10A							HARALAMBIEVA_PBMC_M_M_R_II_AGE_11_22YO_VACCINATED_VS_UNVACCINATED_7YR_UP				GSE13485_CTRL_VS_DAY7_YF17D_VACCINE_PBMC_DN
USP30-AS1							HARALAMBIEVA_PBMC_M_M_R_II_AGE_11_22YO_VACCINATED_VS_UNVACCINATED_7YR_UP						ZAK_PBMC_MRKAD5_HIV_1_GAG_POL_NEF_AGE_20_50YO_1DY_UP	OSMAN_BLOOD_CHAD63_KH_AGE_18_50YO_HIGH_DOSE_SUBJECTS_24HR_UP
TLR3							HARALAMBIEVA_PBMC_M_M_R_II_AGE_11_22YO_VACCINATED_VS_UNVACCINATED_7YR_UP							OSMAN_BLOOD_CHAD63_KH_AGE_18_50YO_HIGH_DOSE_SUBJECTS_24HR_UP
HDX							HARALAMBIEVA_PBMC_M_M_R_II_AGE_11_22YO_VACCINATED_VS_UNVACCINATED_7YR_UP							OSMAN_BLOOD_CHAD63_KH_AGE_18_50YO_HIGH_DOSE_SUBJECTS_24HR_UP
LINC01260							HARALAMBIEVA_PBMC_M_M_R_II_AGE_11_22YO_VACCINATED_VS_UNVACCINATED_7YR_UP										GSE18791_CTRL_VS_NEWCASTLE_VIRUS_DC_8H_DN
IL2RA							HARALAMBIEVA_PBMC_M_M_R_II_AGE_11_22YO_VACCINATED_VS_UNVACCINATED_7YR_UP
IGFBP4							HARALAMBIEVA_PBMC_M_M_R_II_AGE_11_22YO_VACCINATED_VS_UNVACCINATED_7YR_UP
BRSK1							HARALAMBIEVA_PBMC_M_M_R_II_AGE_11_22YO_VACCINATED_VS_UNVACCINATED_7YR_UP
BBS12							HARALAMBIEVA_PBMC_M_M_R_II_AGE_11_22YO_VACCINATED_VS_UNVACCINATED_7YR_UP
POGLUT3							HARALAMBIEVA_PBMC_M_M_R_II_AGE_11_22YO_VACCINATED_VS_UNVACCINATED_7YR_UP
DOP1A							HARALAMBIEVA_PBMC_M_M_R_II_AGE_11_22YO_VACCINATED_VS_UNVACCINATED_7YR_UP
PLEKHA7							HARALAMBIEVA_PBMC_M_M_R_II_AGE_11_22YO_VACCINATED_VS_UNVACCINATED_7YR_UP
PAX8-AS1							HARALAMBIEVA_PBMC_M_M_R_II_AGE_11_22YO_VACCINATED_VS_UNVACCINATED_7YR_UP
TLR7								FRANCO_BLOOD_SANOFI_PASTEUR_SA_INACTIVATED_INFLUENZA_VACCINE_CORRELATED_WITH_ANTIBODY_RESPONSE_AGE_18_40YO_1DY_POSITIVE	GSE13485_DAY1_VS_DAY7_YF17D_VACCINE_PBMC_DN	GAUCHER_PBMC_YF_VAX_STAMARIL_UNKNOWN_AGE_7DY_UP			ZAK_PBMC_MRKAD5_HIV_1_GAG_POL_NEF_AGE_20_50YO_1DY_UP	OSMAN_BLOOD_CHAD63_KH_AGE_18_50YO_HIGH_DOSE_SUBJECTS_24HR_UP	GAUCHER_PBMC_YF_VAX_STAMARIL_UNKNOWN_AGE_10DY_UP
PTPRO								FRANCO_BLOOD_SANOFI_PASTEUR_SA_INACTIVATED_INFLUENZA_VACCINE_CORRELATED_WITH_ANTIBODY_RESPONSE_AGE_18_40YO_1DY_POSITIVE					ZAK_PBMC_MRKAD5_HIV_1_GAG_POL_NEF_AGE_20_50YO_1DY_UP	OSMAN_BLOOD_CHAD63_KH_AGE_18_50YO_HIGH_DOSE_SUBJECTS_24HR_UP
HAVCR2									GSE13485_DAY1_VS_DAY7_YF17D_VACCINE_PBMC_DN	GAUCHER_PBMC_YF_VAX_STAMARIL_UNKNOWN_AGE_7DY_UP			ZAK_PBMC_MRKAD5_HIV_1_GAG_POL_NEF_AGE_20_50YO_1DY_UP	OSMAN_BLOOD_CHAD63_KH_AGE_18_50YO_HIGH_DOSE_SUBJECTS_24HR_UP	GAUCHER_PBMC_YF_VAX_STAMARIL_UNKNOWN_AGE_10DY_UP
BMPR2									GSE13485_DAY1_VS_DAY7_YF17D_VACCINE_PBMC_DN					OSMAN_BLOOD_CHAD63_KH_AGE_18_50YO_HIGH_DOSE_SUBJECTS_24HR_UP
SCAMP1-AS1									GSE13485_DAY1_VS_DAY7_YF17D_VACCINE_PBMC_DN
ZFP1												ZAK_PBMC_MRKAD5_HIV_1_GAG_POL_NEF_AGE_20_50YO_1DY_DN
KCNA3												ZAK_PBMC_MRKAD5_HIV_1_GAG_POL_NEF_AGE_20_50YO_1DY_DN
ZIK1												ZAK_PBMC_MRKAD5_HIV_1_GAG_POL_NEF_AGE_20_50YO_1DY_DN
ZFP82												ZAK_PBMC_MRKAD5_HIV_1_GAG_POL_NEF_AGE_20_50YO_1DY_DN
CCR7												ZAK_PBMC_MRKAD5_HIV_1_GAG_POL_NEF_AGE_20_50YO_1DY_DN
PWAR5												ZAK_PBMC_MRKAD5_HIV_1_GAG_POL_NEF_AGE_20_50YO_1DY_DN
MFHAS1												ZAK_PBMC_MRKAD5_HIV_1_GAG_POL_NEF_AGE_20_50YO_1DY_DN
CCR4												ZAK_PBMC_MRKAD5_HIV_1_GAG_POL_NEF_AGE_20_50YO_1DY_DN
MAN1A2												ZAK_PBMC_MRKAD5_HIV_1_GAG_POL_NEF_AGE_20_50YO_1DY_DN
SNORA68												ZAK_PBMC_MRKAD5_HIV_1_GAG_POL_NEF_AGE_20_50YO_1DY_DN
ST14													ZAK_PBMC_MRKAD5_HIV_1_GAG_POL_NEF_AGE_20_50YO_1DY_UP
AGPAT5														OSMAN_BLOOD_CHAD63_KH_AGE_18_50YO_HIGH_DOSE_SUBJECTS_24HR_UP
RCN1														OSMAN_BLOOD_CHAD63_KH_AGE_18_50YO_HIGH_DOSE_SUBJECTS_24HR_UP
KPNA5																	GSE18791_CTRL_VS_NEWCASTLE_VIRUS_DC_8H_DN

## Sheet: gene families
	cytokines and growth factors	transcription factors	homeodomain proteins	cell differentiation markers	protein kinases	translocated cancer genes	oncogenes	tumor suppressors
tumor suppressors	0	0	0	1	1	0	0	4
oncogenes	1	3	0	1	2	10	10
translocated cancer genes	1	3	0	1	2	10
protein kinases	1	0	0	2	13
cell differentiation markers	1	0	0	17
homeodomain proteins	0	3	3
transcription factors	0	36
cytokines and growth factors	4
	CXCL10	GTF2H4	HDX	ABCB1	AXL	BCL2	BCL2	BMPR1A
	GDF11	GTF3C4	TSHZ2	BMPR1A	BMPR1A	IL21R	IL21R	ERCC4
	PDGFRB	HDX	ZHX1	CCR2	BMPR2	ITK	ITK	EXT2
	SEMA4F	KLF11		CCR4	BRSK1	KNL1	KNL1	FANCF
		KLF8		CCR7	CAMK2D	MAF	MAF
		LMO7		CCR8	CAMK4	MDS2	MDS2
		MAF		CD101	DYRK2	MLLT3	MLLT3
		MLLT3		CD274	ITK	MYC	MYC
		MYC		CD28	OBSCN	PDGFRB	PDGFRB
		NR1D2		CDCP1	PASK	TET1	TET1
		NR3C2		CTLA4	PDGFRB
		RORA		ICOS	TRIO
		TCF4		IL2RA	TXK
		TCF7		LAMP3
		TOX		PDGFRB
		TSHZ2		TLR3
		TULP3		TNFRSF10A
		ZHX1
		ZNF16
		ZNF221
		ZNF225
		ZNF239
		ZNF256
		ZNF268
		ZNF304
		ZNF35
		ZNF416
		ZNF43
		ZNF461
		ZNF483
		ZNF510
		ZNF649
		ZNF823
		ZNF92
		ZXDA
		ZXDB
