# Supplementary material for: Impact of BNT162b First Vaccination on the Immune Transcriptome of Elderly Patients Infected with the B.1.351 SARS-CoV-2 Variant
Source: Research Square preprint supplement (doi:10.21203/rs.3.rs-509143/v1), 2021-06-01
Supplement: Supplementary file [file d8c3602c6b535c347be59013.pdf]

## Supplementary Information

### **Impact of BNT162b first vaccination on the immune transcriptome of elderly patients infected with the B.1.351 SARS-CoV-2 variant**

Ludwig Knabl<sup>1,\*†</sup>, Hye Kyung Lee<sup>2,\*†</sup>, Manuel Wieser<sup>1</sup>, Anna Mur<sup>3</sup>, August Zabernigg<sup>3</sup>,  
Ludwig Knabl Sr.<sup>4</sup>, Simon Rauch<sup>5</sup>, Matthias Bock<sup>5, 6</sup>, Jana Schumacher<sup>7</sup>,  
Norbert Kaiser<sup>7</sup>, Priscilla A. Furth<sup>8,†</sup> and Lothar Hennighausen<sup>2,†</sup>

<sup>1</sup>TyrolPath, Zams, Austria; <sup>2</sup>National Institute of Diabetes, Digestive and Kidney Diseases, Bethesda, MD 20892, USA; <sup>3</sup>Division of Internal Medicine, Krankenhaus Kufstein, Kufstein, Austria; <sup>4</sup>Krankenhaus St. Vinzenz, Zams, Austria; <sup>5</sup>Division of Anesthesia and Intensive Care Medicine, Krankenhaus Meran, Meran, Italy; <sup>6</sup>Department of Anesthesiology, perioperative Medicine and Intensive Care Medicine, Paracelsus Medical University, Salzburg, Austria; <sup>7</sup>Division of Internal Medicine, Krankenhaus St. Johann, St. Johann, Austria; <sup>8</sup>Departments of Oncology & Medicine, Georgetown University, Washington, DC, USA.

\*equal contribution

†Corresponding authors: LK: [Ludwig.knabl@tyrolpath.at](mailto:Ludwig.knabl@tyrolpath.at); HKL: [hyekyung.lee@nih.gov](mailto:hyekyung.lee@nih.gov); PAF: [paf3@georgetown.edu](mailto:paf3@georgetown.edu); LH: [lotharh@nih.gov](mailto:lotharh@nih.gov)

## **Supplementary Tables**

**Supplementary Table 1.** Demographic and Clinical Characteristics of study population.

**Supplementary Table 2.** List of all genes with normalized read counts in each replicate at non-COVID controls and B.1.351 variant infected COVID-19 patients,  $\log_2$  (fold change),  $p$ -value and adjusted  $p$ -value as well as upregulated gene list and GSEA analysis.

**Supplementary Table 3.** List of all genes with normalized read counts in each replicate at unvaccinated and vaccinated groups,  $\log_2$  (fold change),  $p$ -value and adjusted  $p$ -value as well as upregulated gene list and GSEA analysis.

**Supplementary Table 4.** List of all genes with normalized read counts in each replicate at 1<sup>st</sup> and 2<sup>nd</sup> samples in vaccinated group,  $\log_2$  (fold change),  $p$ -value and adjusted  $p$ -value as well as upregulated gene list and GSEA analysis.

**Supplementary Table 5.** List of all genes with normalized read counts in each replicate at unvaccinated and young-unvaccinated groups,  $\log_2$  (fold change),  $p$ -value and adjusted  $p$ -value as well as upregulated gene list and GSEA analysis.

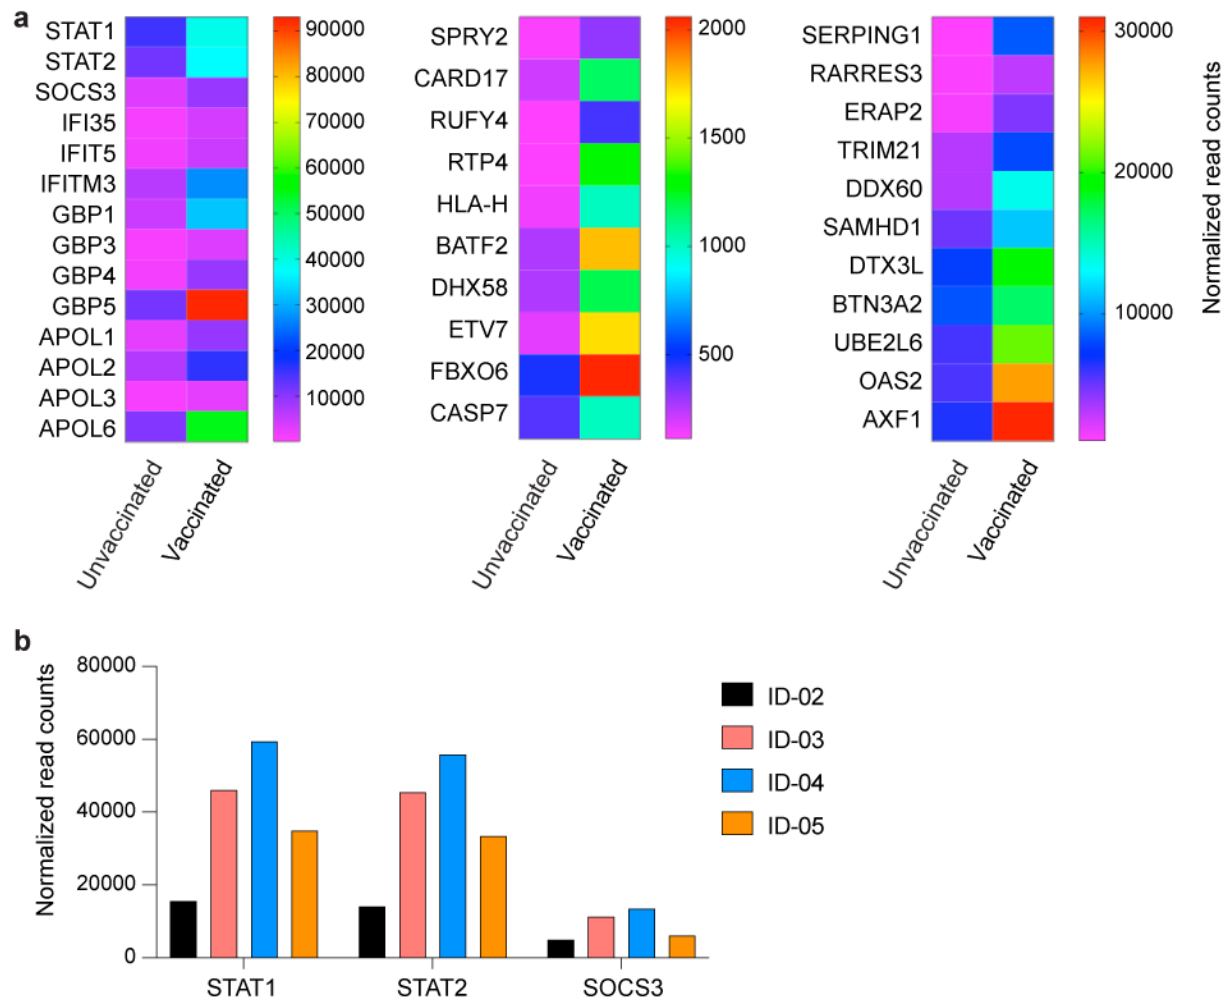

**Supplementary Figure 1. Upregulation of Interferon stimulated genes (ISGs), innate antiviral immunity and COVID-19-SARS-CoV-2 infection genes in vaccinated COVID-19 patients. a.** Heatmap showing the significant enriched genes related to immune responses and SARS-CoV-2 virus infection. **b.** mRNA levels of JAK/STAT signaling components, STAT1, STAT2 and SOCS3, measured by RNA-seq were presented by bar graphs.
